# Supplementary material for: Enantioconvergent and diastereoselective synthesis of atropisomeric hydrazides bearing a cyclic quaternary stereocenter through ternary catalysis
Source: Royal Society of Chemistry journal article supplement (doi:10.1039/d4sc03190c), 2024-01-01
Supplement: d4sc03190c1.pdf [file d4sc03190c1.pdf]

## Supporting Information

### **Enantioconvergent and Diastereoselective Synthesis of Atropisomeric Hydrazides Bearing a Cyclic Quaternary Stereocenter through Ternary Catalysis**

Xia Wang,<sup>1</sup> Shao-Jie Wang,<sup>1</sup> Xiaolan Xin,<sup>1</sup> Hao An,<sup>1</sup> Zhifeng Tu,<sup>1,\*</sup> Hui Yang,<sup>2</sup> Ming Wah Wong<sup>2,\*</sup> and Shenci Lu<sup>1,\*</sup>

<sup>1</sup>Frontiers Science Center for Flexible Electronics (FSCFE), Shaanxi Institute of Flexible Electronics (SIFE) & Shaanxi Institute of Biomedical Materials and Engineering (SIBME), Northwestern Polytechnical University (NPU), 127 West Youyi Road, Xi'an 710072, China

<sup>2</sup>Department of Chemistry, National University of Singapore, 3 Science Drive 3, Singapore 117543, Singapore

Email: iamzftu@nwpu.edu.cn; chmwmw@nus.edu.sg; iamsclu@nwpu.edu.cn

## Table of content

|                                                                                         |      |
|-----------------------------------------------------------------------------------------|------|
| 1. General information.....                                                             | S3   |
| 2. General procedure for the synthesis of substrates <b>1</b> and <b>3</b> .....        | S4   |
| 3. Characterization of substrates.....                                                  | S5   |
| 4. General procedure for the synthesis of product.....                                  | S14  |
| 5. One-mmol-scale reaction.....                                                         | S17  |
| 6. Synthetic Transformations of Product.....                                            | S18  |
| 7. NMR revealed the catalytic reaction profile.....                                     | S21  |
| 8. Control reactions and the stepwise reactions.....                                    | S22  |
| 9. Characterization of products.....                                                    | S23  |
| 10. X-ray Crystallographic .....                                                        | S55  |
| 11. <sup>1</sup> H NMR, <sup>13</sup> C NMR, <sup>19</sup> F NMR and HPLC spectra. .... | S59  |
| 12. Computational detail.....                                                           | S213 |
| 13. Reference .....                                                                     | S350 |

## 1. General information

All reactions were carried out under nitrogen atmosphere in a glovebox. Reagents were purchased from commercial sources and used without further purification.  $^1\text{H}$  NMR,  $^{19}\text{F}$  NMR and  $^{13}\text{C}$  NMR spectra were recorded at 25 °C (all substrates) on a Bruker AMX500 (500 MHz) spectrometer.  $^1\text{H}$  NMR,  $^{19}\text{F}$  NMR and  $^{13}\text{C}$  NMR spectra were recorded at 60 °C (all products) on a Bruker AMX500 (500 MHz) spectrometer. Chemical shifts were reported in parts per million (ppm), and the residual solvent peak was used as an internal reference:  $^1\text{H}$  (chloroform  $\delta$  7.26),  $^{13}\text{C}$  (chloroform  $\delta$  77.0). Data are reported as follows: chemical shift, multiplicity (s = singlet, d = doublet, t = triplet, q = quartet, m = multiplet, br = broad), coupling constants (Hz) and integration. Melting point (MP) was obtained on Buchi B-540. For thin layer chromatography (TLC), Merck pre-coated TLC plates (Merck 60 F254) were used, and compounds were visualized with a UV light at 254 nm. High resolution mass spectra (HRMS) were obtained on a Finnigan/MAT 95XL-T spectrometer. Specific rotations were measured using an Anton Paar MCP-150 digital polarimeter using a 1 cm glass cell. Enantiomeric excesses (ee) were determined by HPLC analysis on ThermoFisher HPLC units, including the following instruments: pump, LPG3400SDN; detector, VWD-3400RS; column, Chiralcel OD-H, Chiralpak AD-H, Chiralpak IA, Chiralpak IB-3. All chiral phosphoric acids were purchased from commercial sources. *Tert*-butyl (2-methyl-4-oxo-6-phenylhex-5-yn-3-yl)carbamate (**1a**) and *tert*-butyl (6-(4-methoxyphenyl)-2-methyl-4-oxohex-5-yn-3-yl)carbamate (**1e**) were synthesized by the reported procedure.<sup>1</sup> *Tert*-butyl (3-oxo-1,5-diphenylpent-4-yn-2-yl)carbamate (**1k**), *tert*-butyl (3-oxo-5-phenylpent-4-yn-2-yl)carbamate (**1j**) were synthesized by the reported procedure.<sup>2</sup> Diethyl (*E*)-diazene-1,2-dicarboxylate (**2a**), dibenzyl (*E*)-diazene-1,2-dicarboxylate (**2b**) and diisopropyl (*E*)-diazene-1,2-dicarboxylate (**2c**) were purchased from commercial sources. Ethyl 2-(((*tert*-butoxycarbonyl)oxy)methyl)acrylate (**4a**), methyl 2-(((*tert*-butoxycarbonyl)oxy)methyl)acrylate (**4h**) and isopropyl 2-(((*tert*-butoxycarbonyl)oxy)methyl)acrylate (**4i**) were synthesized by the reported procedure.<sup>3</sup>

## 2. General procedure for the synthesis of substrates 1 and 3

**A:** Typical procedure for the preparation of **1**<sup>4</sup>:

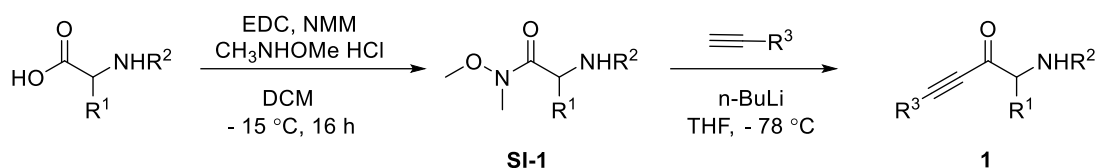

To a solution of amino acid (10 mmol, 1.0 equiv.), N,O-dimethyl hydroxylamine hydrochloride (11.0 mmol, 1.1 equiv.), NMM (11 mmol, 1.1 equiv.) in DCM (20 mL) at -15 °C was slowly added EDC (11 mmol, 1.1 equiv.) in four equal portion over 15 min. The mixture was stirred at -15 °C for 16 h and then washed with 1N aqueous HCl (2 × 20 mL), saturated aqueous NaHCO<sub>3</sub> (2 × 25 mL) and saturated aqueous brine (1 × 25 mL). The organic layer was then dried with Na<sub>2</sub>SO<sub>4</sub> and concentrated to afford tert-butyl (1-(methoxy(methyl)amino)-3-methyl-1-oxobutan-2-yl) carbamate as a white solid in quantitative yield.

To a stirred solution of arylacetylene (15.4 mmol, 4.0 equiv.) in THF (15 mL) at -78 °C, a solution of 2.5 M n-BuLi in hexanes (14.8 mmol, 3.85 equiv.) was added dropwise. The solution was stirred for 45 min. Then, a solution of **SI-1** (3.85 mmol) in THF (10 mL) was dropwise added at -78 °C and stirred for 1 h at the same temperature. The mixture was then allowed to warm to -20 °C and after 2 h, the reaction was quenched by addition of a 1 M NaH<sub>2</sub>PO<sub>4</sub> solution (60 mL). The aqueous phase was diluted by addition of 50 mL of water, then extracted with EtOAc (3 × 40 mL). The combined organic layers were washed with brine, then dried over Na<sub>2</sub>SO<sub>4</sub> and evaporated in vacuo. Purification of the residue by flash chromatography silica.

**B:** Typical procedure for the preparation of **4**<sup>[3]</sup>:

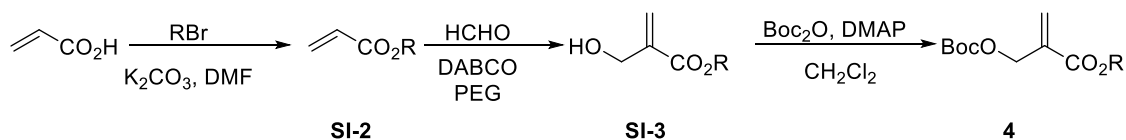

Under nitrogen atmosphere, a mixture of acrylic acid (5.40 g, 75 mmol) and K<sub>2</sub>CO<sub>3</sub> (10.35 g) in DMF (125 mL) was stirred at 0 °C for 45 min. After slowly adding alkyl bromide (63 mmol), the reaction mixture was stirred at 100 °C through an oil bath for 24 h. The reaction mixture was added into water (1 L) and the resulting mixture was then extracted with Et<sub>2</sub>O (250 mL × 2). The organic layer was dried over Na<sub>2</sub>SO<sub>4</sub>, concentrated, and purified by flash column to

provide the intermediate **SI-2**.

A mixture of **SI-2** (10 mmol), methyl aldehyde (0.36 g, 12 mmol) and triethylene diamine (1.12 g, 10 mmol) in polyethylene glycol was stirred at 25 °C for 24 h. The resulting reaction mixture was diluted with Et<sub>2</sub>O (50 mL) and washed with water. The organic layer was dried over Na<sub>2</sub>SO<sub>4</sub>, concentrated, and purified by flash column to provide the intermediate **SI-3**. The mixture of dibutyldicarbonate (1.31 g, 6 mmol) and 4-dimethylaminopyridine (0.12 g, 1 mmol) in DCM (10 mL) was slowly added (30 min) to the solution of **SI-3** (5 mmol, 1 equiv.) in DCM (10 mL). The mixture was stirred at 0 °C for 5 h. The resulting reaction mixture was washed with 1 N of aqueous HCl, saturated aqueous NaHCO<sub>3</sub>, and brine. The organic layer was dried over Na<sub>2</sub>SO<sub>4</sub>, concentrated and purified by flash column to provide product **4**.

### 3. Characterization of substrates

#### *tert*-butyl (2-methyl-4-oxo-6-(*p*-tolyl)hex-5-yn-3-yl)carbamate (**1d**)

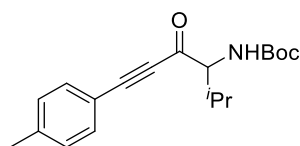

White solid, m.p. 100-102 °C, 62% yield.

**<sup>1</sup>H NMR** (500 MHz, CDCl<sub>3</sub>) δ 7.48 (d, *J* = 7.9 Hz, 2H), 7.20 (d, *J* = 7.9 Hz, 2H), 5.18 (d, *J* = 9.2 Hz, 1H), 4.50 (dd, *J* = 9.1, 3.9 Hz, 1H), 2.49 (s, 1H), 2.39 (s, 3H), 1.46 (s, 9H), 1.08 (d, *J* = 6.9 Hz, 3H), 0.89 (d, *J* = 6.9 Hz, 3H). **<sup>13</sup>C NMR** (126 MHz, CDCl<sub>3</sub>) δ 187.10, 155.83, 141.87, 133.22, 129.49, 116.52, 94.89, 86.63, 79.83, 65.90, 30.58, 28.32, 21.77, 19.72, 16.73. **HRMS** (ESI, *m/z*): calcd. for C<sub>19</sub>H<sub>25</sub>NO<sub>3</sub> [M+Na]<sup>+</sup> 338.1726, found 338.1758.

#### *tert*-butyl (6-(4-methoxyphenyl)-2-methyl-4-oxohex-5-yn-3-yl)carbamate (**1e**)

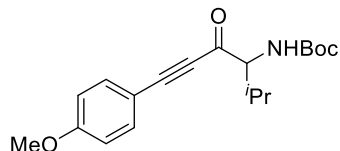

White solid, m.p. 90-92 °C, 48% yield.

**<sup>1</sup>H NMR** (500 MHz, CDCl<sub>3</sub>) δ 7.54 (d, *J* = 8.2 Hz, 2H), 6.91 (d, *J* = 8.9 Hz, 2H), 5.18 (d, *J* = 9.2 Hz, 1H), 4.49 (dd, *J* = 9.5, 3.8 Hz, 1H), 3.85 (s, 3H), 2.48 (dd, *J* = 12.2, 6.6 Hz, 1H), 1.46 (s, 9H), 1.07 (d, *J* = 6.9 Hz, 3H), 0.88 (d, *J* = 6.9 Hz, 3H). **<sup>13</sup>C NMR** (126 MHz, CDCl<sub>3</sub>) δ 187.00,

161.94, 155.84, 135.28, 114.44, 111.35, 95.46, 86.77, 79.78, 65.81, 55.43, 30.62, 28.31, 19.71, 16.74. **HRMS** (ESI, m/z): calcd. for C<sub>19</sub>H<sub>25</sub>NO<sub>4</sub> [M+Na]<sup>+</sup> 354.1676, found 354.1679.

**tert-butyl (6-(4-fluorophenyl)-2-methyl-4-oxohex-5-yn-3-yl)carbamate (1f)**

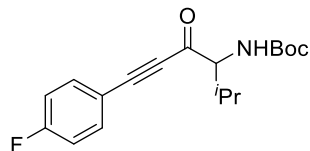

White solid, m.p. 88-90 °C, 55% yield.

**<sup>1</sup>H NMR** (500 MHz, CDCl<sub>3</sub>) δ 7.69 – 7.50 (m, 2H), 7.10 (t, *J* = 8.4 Hz, 2H), 5.21 (d, *J* = 9.1 Hz, 1H), 4.51 (dd, *J* = 9.1, 4.0 Hz, 1H), 2.48 (s, 1H), 1.46 (s, 9H), 1.09 (d, *J* = 6.8 Hz, 3H), 0.90 (d, *J* = 7.0 Hz, 3H). **<sup>13</sup>C NMR** (126 MHz, CDCl<sub>3</sub>) δ 186.97, 163.12, 160.48 (d, *J* = 1176.84 Hz), 135.48 (d, *J* = 8.82 Hz), 116.24 (d, *J* = 22.68 Hz), 115.77 (d, *J* = 3.78 Hz), 92.90, 86.67, 79.87, 65.90, 30.44, 28.28, 19.68, 16.72. **<sup>19</sup>F NMR** (471 MHz, CDCl<sub>3</sub>) δ -105.57. **HRMS** (ESI, m/z): calcd. for C<sub>18</sub>H<sub>22</sub>FNO<sub>3</sub> [M+H]<sup>+</sup> 320.1657, found 320.1655.

**tert-butyl (2-methyl-4-oxo-6-(m-tolyl)hex-5-yn-3-yl)carbamate (1g)**

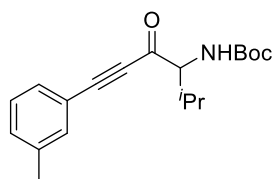

White solid, m.p. 74-76 °C, 55% yield.

**<sup>1</sup>H NMR** (500 MHz, CDCl<sub>3</sub>) δ 7.40 (d, *J* = 5.6 Hz, 2H), 7.29 – 7.27 (m, 2H), 5.17 (d, *J* = 9.2 Hz, 1H), 4.50 (dd, *J* = 9.4, 3.9 Hz, 1H), 2.50 (qq, *J* = 6.7, 3.3 Hz, 1H), 2.36 (s, 3H), 1.46 (s, 9H), 1.08 (d, *J* = 6.8 Hz, 3H), 0.89 (d, *J* = 6.8 Hz, 3H). **<sup>13</sup>C NMR** (126 MHz, CDCl<sub>3</sub>) δ 187.13, 155.84, 138.54, 133.65, 132.00, 130.33, 128.59, 119.44, 94.56, 86.49, 79.88, 65.94, 30.56, 28.32, 21.15, 19.73, 16.72. **HRMS** (ESI, m/z): calcd. for C<sub>19</sub>H<sub>25</sub>NO<sub>3</sub> [M+Na]<sup>+</sup> 338.1726, found 338.1722.

**tert-butyl (6-(3-chlorophenyl)-2-methyl-4-oxohex-5-yn-3-yl)carbamate (1h)**

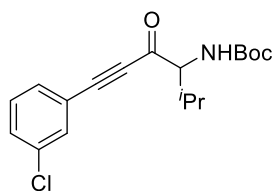

White solid, m.p. 74-76 °C, 65% yield.

**<sup>1</sup>H NMR** (500 MHz, CDCl<sub>3</sub>) δ 7.57 (s, 1H), 7.46 (t, *J* = 9.1 Hz, 2H), 7.34 (t, *J* = 7.0 Hz, 1H), 5.18 (d, *J* = 9.0 Hz, 1H), 4.49 (dd, *J* = 9.6, 4.0 Hz, 1H), 2.49 (s, 1H), 1.46 (s, 9H), 1.08 (d, *J* = 6.9 Hz, 3H), 0.89 (d, *J* = 7.1 Hz, 3H). **<sup>13</sup>C NMR** (126 MHz, CDCl<sub>3</sub>) δ 186.98, 155.81, 134.62, 132.74, 131.27, 131.17, 129.97, 121.36, 91.81, 87.14, 80.00, 65.97, 30.39, 28.30, 19.71, 16.74. **HRMS** (ESI, *m/z*): calcd. for C<sub>18</sub>H<sub>22</sub>ClNO<sub>3</sub> [M+Na]<sup>+</sup> 358.1180, found 358.1175.

***tert*-butyl (2-methyl-4-oxo-6-(*o*-tolyl)hex-5-yn-3-yl)carbamate (1i)**

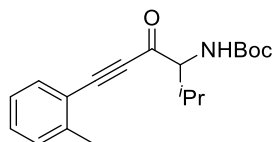

White solid, m.p. 59-61 °C, 68% yield.

**<sup>1</sup>H NMR** (500 MHz, CDCl<sub>3</sub>) δ 7.55 (d, *J* = 7.6 Hz, 1H), 7.36 (t, *J* = 7.6 Hz, 1H), 7.25 (s, 1H), 7.21 (t, *J* = 7.5 Hz, 1H), 5.18 (d, *J* = 9.1 Hz, 1H), 4.51 (d, *J* = 12.3 Hz, 1H), 2.50 (s, 3H), 1.46 (s, 9H), 1.08 (d, *J* = 6.8 Hz, 3H), 0.90 (d, *J* = 7.0 Hz, 3H). **<sup>13</sup>C NMR** (126 MHz, CDCl<sub>3</sub>) δ 187.06, 155.82, 142.33, 133.75, 131.12, 129.88, 125.95, 119.47, 93.29, 90.51, 79.91, 66.01, 30.71, 28.32, 20.67, 19.76, 16.74. **HRMS** (ESI, *m/z*): calcd. for C<sub>19</sub>H<sub>25</sub>NO<sub>3</sub> [M+Na]<sup>+</sup> 338.1726, found 338.1729.

***tert*-butyl (3-oxo-5-phenylpent-4-yn-2-yl)carbamate (1j)**

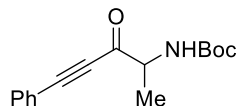

White solid, m.p. 95-97 °C, 70% yield.

**<sup>1</sup>H NMR** (500 MHz, CDCl<sub>3</sub>) δ 7.59 (t, *J* = 5.9 Hz, 2H), 7.52 – 7.44 (m, 1H), 7.44 – 7.36 (m, 2H), 5.33 (s, 1H), 4.53 (q, *J* = 8.1, 7.4 Hz, 1H), 1.52 – 1.44 (m, 12H). **<sup>13</sup>C NMR** (126 MHz, CDCl<sub>3</sub>) δ 187.18, 155.14, 133.18, 131.07, 128.69, 119.59, 94.29, 85.88, 79.91, 56.97, 28.33, 17.74. **HRMS** (ESI, *m/z*): calcd. for C<sub>16</sub>H<sub>19</sub>NO<sub>3</sub> [M+Na]<sup>+</sup> 372.1570, found 372.1563.

***tert*-butyl (3-oxo-1,5-diphenylpent-4-yn-2-yl)carbamate (1k)**

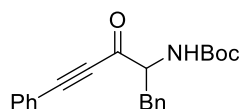

White solid, m.p. 93-95 °C, 70% yield.

**<sup>1</sup>H NMR** (500 MHz, CDCl<sub>3</sub>) δ 7.56 (d, *J* = 7.5 Hz, 2H), 7.47 (q, *J* = 7.1 Hz, 1H), 7.40 (t, *J* = 7.4 Hz, 2H), 7.34 – 7.14 (m, 5H), 5.14 (dd, *J* = 8.1, 3.9 Hz, 1H), 4.79 (t, *J* = 6.7 Hz, 1H), 3.28

(qd,  $J = 14.1, 6.5$  Hz, 2H), 1.43 (s, 9H).  $^{13}\text{C}$  NMR (126 MHz,  $\text{CDCl}_3$ )  $\delta$  185.97, 155.12, 133.25, 131.15, 129.54, 129.26, 128.69, 127.06, 119.53, 94.81, 86.41, 80.00, 62.08, 37.44, 28.32.

**HRMS** (ESI,  $m/z$ ): calcd. for  $\text{C}_{22}\text{H}_{23}\text{NO}_3$   $[\text{M}+\text{Na}]^+$  296.1257, found 296.1251.

***tert*-butyl (1-(4-nitrophenyl)-3-oxo-5-phenylpent-4-yn-2-yl)carbamate (1l)**

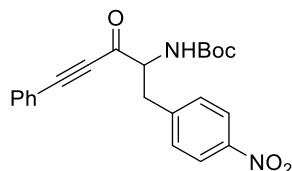

White solid, m.p. 165-167 °C, 70% yield.

$^1\text{H}$  NMR (500 MHz,  $\text{CDCl}_3$ )  $\delta$  8.15 (d,  $J = 8.8$  Hz, 2H), 7.57 (d,  $J = 7.3$  Hz, 2H), 7.51 (t,  $J = 7.5$  Hz, 1H), 7.41 (dd,  $J = 12.2, 8.0$  Hz, 4H), 5.26 (d,  $J = 7.8$  Hz, 1H), 4.85 (q,  $J = 6.7$  Hz, 1H), 3.47 (dd,  $J = 14.1, 6.0$  Hz, 1H), 3.31 (dd,  $J = 14.1, 6.2$  Hz, 1H), 1.43 (s, 9H).  $^{13}\text{C}$  NMR (126 MHz,  $\text{CDCl}_3$ )  $\delta$  184.66, 154.95, 147.15, 143.81, 133.29, 131.53, 130.48, 128.82, 123.67, 119.08, 95.72, 86.13, 80.43, 61.69, 37.48, 28.27. **HRMS** (ESI,  $m/z$ ): calcd. for  $\text{C}_{22}\text{H}_{22}\text{N}_2\text{O}_5$   $[\text{M}+\text{Na}]^+$  417.1421, found 417.1428.

***tert*-butyl (2,2-dimethyl-4-oxo-6-phenylhex-5-yn-3-yl)carbamate (1m)**

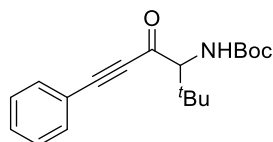

White solid, m.p. 113-115 °C, 2% yield.

$^1\text{H}$  NMR (500 MHz,  $\text{CDCl}_3$ )  $\delta$  7.57 (d,  $J = 6.0$  Hz, 2H), 7.47 (q,  $J = 5.9$  Hz, 1H), 7.39 (q,  $J = 5.9$  Hz, 2H), 5.22 (d,  $J = 16.1$  Hz, 1H), 4.50 (s, 1H), 2.13 – 1.96 (m, 1H), 1.78 – 1.63 (m, 1H), 1.48 – 1.29 (m, 13H), 0.91 (q,  $J = 5.7$  Hz, 3H).  $^{13}\text{C}$  NMR (126 MHz,  $\text{CDCl}_3$ )  $\delta$  187.15, 155.36, 133.07, 130.94, 128.59, 119.57, 93.97, 86.14, 79.80, 61.11, 31.29, 28.23, 27.14, 22.30, 13.73. **HRMS** (ESI,  $m/z$ ): calcd. for  $\text{C}_{19}\text{H}_{25}\text{NO}_3$   $[\text{M}+\text{H}]^+$  316.1907, found 316.1913.

***tert*-butyl (6-(4-ethylphenyl)-2-methyl-4-oxohex-5-yn-3-yl)carbamate (1n)**

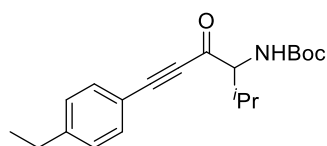

White solid, m.p. 53-55 °C, 61% yield.

$^1\text{H}$  NMR (500 MHz,  $\text{CDCl}_3$ )  $\delta$  7.51 (d,  $J = 7.8$  Hz, 2H), 7.23 (d,  $J = 7.8$  Hz, 2H), 5.19 (d,  $J =$



9.0 Hz, 1H), 4.51 (dd,  $J = 9.1, 3.9$  Hz, 1H), 2.68 (q,  $J = 7.6$  Hz, 2H), 2.50 (s, 1H), 1.46 (s, 9H), 1.24 (t,  $J = 7.6$  Hz, 3H), 1.08 (d,  $J = 6.9$  Hz, 3H), 0.89 (d,  $J = 6.9$  Hz, 3H).  $^{13}\text{C}$  NMR (126 MHz,  $\text{CDCl}_3$ )  $\delta$  187.10, 155.83, 148.07, 133.34, 128.31, 116.72, 94.94, 86.61, 79.83, 65.91, 30.60, 29.03, 28.32, 19.71, 16.74, 15.14. HRMS (ESI,  $m/z$ ): calcd. for  $\text{C}_{20}\text{H}_{27}\text{NO}_3$   $[\text{M}+\text{K}]^+$  368.1623, found 368.1627.

***tert*-butyl (6-(4-butylphenyl)-2-methyl-4-oxohex-5-yn-3-yl)carbamate (1o)**

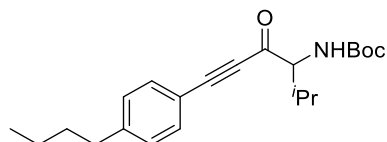

White solid, m.p. 92-94 °C, 53% yield.

$^1\text{H}$  NMR (500 MHz,  $\text{CDCl}_3$ )  $\delta$  7.50 (d,  $J = 8.1$  Hz, 2H), 7.21 (d,  $J = 8.1$  Hz, 2H), 5.19 (d,  $J = 9.1$  Hz, 1H), 4.50 (dd,  $J = 9.3, 3.9$  Hz, 1H), 2.64 (t,  $J = 7.8$  Hz, 2H), 2.49 (qt,  $J = 7.1, 4.4$  Hz, 1H), 1.62 – 1.57 (m, 2H), 1.46 (s, 9H), 1.37 – 1.30 (m, 2H), 1.08 (d,  $J = 6.9$  Hz, 3H), 0.91 (dt,  $J = 16.0, 6.9$  Hz, 6H).  $^{13}\text{C}$  NMR (126 MHz,  $\text{CDCl}_3$ )  $\delta$  187.08, 155.83, 146.82, 133.26, 128.84, 116.69, 94.97, 86.63, 79.82, 65.91, 35.78, 33.19, 30.61, 28.31, 22.27, 19.71, 16.73, 13.88. HRMS (ESI,  $m/z$ ): calcd. for  $\text{C}_{22}\text{H}_{31}\text{NO}_3$   $[\text{M}+\text{K}]^+$  396.1936, found 396.1934.

***tert*-butyl (6-(4-(*tert*-butyl)phenyl)-2-methyl-4-oxohex-5-yn-3-yl)carbamate (1p)**

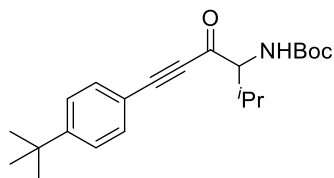

White solid, m.p. 54-56 °C, 40% yield.

$^1\text{H}$  NMR (500 MHz,  $\text{CDCl}_3$ )  $\delta$  7.53 (d,  $J = 8.4$  Hz, 2H), 7.41 (d,  $J = 8.4$  Hz, 2H), 5.28 (d,  $J = 5.8$  Hz, 1H), 4.52 (d,  $J = 5.0$  Hz, 1H), 2.50 (s, 1H), 1.46 (t,  $J = 2.8$  Hz, 9H), 1.32 (s, 9H), 1.08 (d,  $J = 6.8$  Hz, 3H), 0.90 (d,  $J = 7.2$  Hz, 3H).  $^{13}\text{C}$  NMR (126 MHz,  $\text{CDCl}_3$ )  $\delta$  187.00, 155.80, 154.81, 133.07, 125.72, 116.53, 94.75, 86.58, 79.69, 65.91, 35.05, 30.98, 30.57, 28.29, 19.67, 16.75. HRMS (ESI,  $m/z$ ): calcd. for  $\text{C}_{22}\text{H}_{31}\text{NO}_3$   $[\text{M}+\text{Na}]^+$  380.2196, found 380.2197.

***tert*-butyl (6-([1,1'-biphenyl]-4-yl)-2-methyl-4-oxohex-5-yn-3-yl)carbamate (1q)**

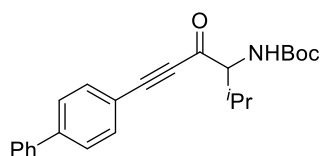

White solid, m.p. 114-116 °C, 50% yield.

**<sup>1</sup>H NMR** (500 MHz, CDCl<sub>3</sub>) δ 7.65 (d, *J* = 7.4 Hz, 2H), 7.63 – 7.55 (m, 4H), 7.47 – 7.41 (m, 2H), 7.41 – 7.35 (m, 1H), 5.23 (d, *J* = 10.3 Hz, 1H), 4.54 (dd, *J* = 9.3, 3.9 Hz, 1H), 2.52 (s, 1H), 1.47 (s, 9H), 1.10 (d, *J* = 6.9 Hz, 3H), 0.91 (d, *J* = 6.9 Hz, 3H). **<sup>13</sup>C NMR** (126 MHz, CDCl<sub>3</sub>) δ 187.08, 155.87, 143.87, 139.68, 133.72, 129.02, 128.29, 127.33, 127.15, 118.34, 94.23, 87.46, 79.89, 66.00, 30.58, 28.36, 19.77, 16.81. **HRMS** (ESI, *m/z*): calcd. for C<sub>24</sub>H<sub>27</sub>NO<sub>3</sub> [M+Na]<sup>+</sup> 400.1883, found 400.1885.

***tert*-butyl (6-(4'-ethyl-[1,1'-biphenyl]-4-yl)-2-methyl-4-oxohex-5-yn-3-yl)carbamate (1r)**

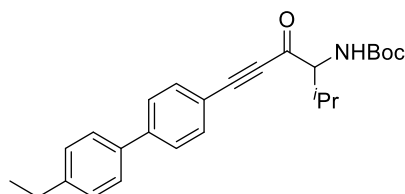

White solid, m.p. 142-144 °C, 58% yield.

**<sup>1</sup>H NMR** (500 MHz, CDCl<sub>3</sub>) δ 7.62 (q, *J* = 8.3 Hz, 4H), 7.52 (d, *J* = 6.5 Hz, 2H), 7.29 (d, *J* = 6.4 Hz, 2H), 5.20 (s, 1H), 4.53 (d, *J* = 7.9 Hz, 1H), 2.70 (q, *J* = 7.6 Hz, 2H), 2.61 – 2.29 (m, 1H), 1.47 (s, 9H), 1.27 (t, *J* = 7.6 Hz, 3H), 1.09 (d, *J* = 6.9 Hz, 3H), 0.91 (d, *J* = 6.9 Hz, 3H). **<sup>13</sup>C NMR** (126 MHz, CDCl<sub>3</sub>) δ 187.01, 155.80, 144.57, 143.81, 136.97, 133.65, 128.50, 127.06, 127.02, 117.91, 94.41, 87.34, 79.83, 65.91, 30.55, 28.51, 28.29, 19.69, 16.72, 15.48. **HRMS** (ESI, *m/z*): calcd. for C<sub>26</sub>H<sub>31</sub>NO<sub>3</sub> [M+K]<sup>+</sup> 444.1936, found 444.1935.

***tert*-butyl (6-(4-ethoxyphenyl)-2-methyl-4-oxohex-5-yn-3-yl)carbamate (1s)**

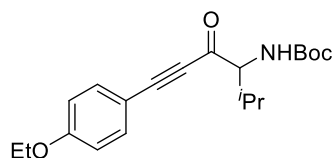

White solid, m.p. 109-111 °C, 57% yield.

**<sup>1</sup>H NMR** (500 MHz, CDCl<sub>3</sub>) δ 7.53 (d, *J* = 8.4 Hz, 2H), 6.89 (d, *J* = 8.4 Hz, 2H), 5.22 (d, *J* = 9.0 Hz, 1H), 4.49 (dd, *J* = 9.1, 3.9 Hz, 1H), 4.06 (q, *J* = 7.0 Hz, 2H), 2.49 (s, 1H), 1.49 – 1.39 (m, 12H), 1.08 (d, *J* = 6.9 Hz, 3H), 0.89 (d, *J* = 7.0 Hz, 3H). **<sup>13</sup>C NMR** (126 MHz, CDCl<sub>3</sub>) δ 186.96, 161.35, 155.83, 135.27, 114.86, 111.09, 95.62, 86.75, 79.74, 65.81, 63.75, 30.63, 28.30,

19.70, 16.74, 14.61. **HRMS** (ESI, m/z): calcd. for C<sub>20</sub>H<sub>27</sub>NO<sub>4</sub> [M+Na]<sup>+</sup> 368.1832, found 368.1829.

**tert-butyl (2-methyl-4-oxo-6-(4-(trifluoromethyl)phenyl)hex-5-yn-3-yl)carbamate (1t)**

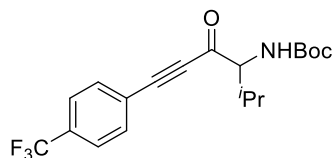

White solid, m.p. 88-90 °C, 65% yield.

**<sup>1</sup>H NMR** (500 MHz, CDCl<sub>3</sub>) δ 7.84 – 7.58 (m, 4H), 5.14 (d, *J* = 8.6 Hz, 1H), 4.52 (d, *J* = 8.8 Hz, 1H), 2.49 (s, 1H), 1.46 (s, 9H), 1.09 (d, *J* = 6.8 Hz, 3H), 0.90 (d, *J* = 6.8 Hz, 3H). **<sup>13</sup>C NMR** (126 MHz, CDCl<sub>3</sub>) δ 186.94, 155.81, 133.25, 132.48 (q, *J* = 32.76 Hz), 125.63 (q, *J* = 3.78 Hz), 123.46, 123.49 (q, *J* = 289.80 Hz), 91.27, 87.86, 80.07, 66.00, 30.35, 28.30, 19.71, 16.74. **<sup>19</sup>F NMR** (471 MHz, CDCl<sub>3</sub>) δ -63.22. **HRMS** (ESI, m/z): calcd. for C<sub>19</sub>H<sub>22</sub>F<sub>3</sub>NO<sub>3</sub> [M+H]<sup>+</sup> 370.1625, found 370.1622.

**tert-butyl (6-(3-fluorophenyl)-2-methyl-4-oxohex-5-yn-3-yl)carbamate (1u)**

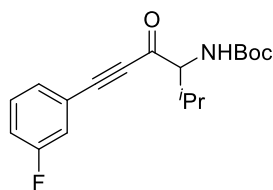

White solid, m.p. 93-95 °C, 48% yield.

**<sup>1</sup>H NMR** (500 MHz, CDCl<sub>3</sub>) δ 7.38 (t, *J* = 4.9 Hz, 2H), 7.28 (d, *J* = 6.9 Hz, 1H), 7.25 – 7.12 (m, 1H), 5.14 (d, *J* = 9.0 Hz, 1H), 4.50 (d, *J* = 12.2 Hz, 1H), 2.49 (s, 1H), 1.46 (s, 9H), 1.08 (d, *J* = 6.9 Hz, 3H), 0.89 (d, *J* = 7.0 Hz, 3H). **<sup>13</sup>C NMR** (126 MHz, CDCl<sub>3</sub>) δ 186.99, 162.22 (d, *J* = 248.22 Hz), 155.80, 130.44 (d, *J* = 7.56 Hz), 128.99 (d, *J* = 2.52 Hz), 121.43 (d, *J* = 8.82 Hz), 119.72 (d, *J* = 23.94 Hz), 118.45 (d, *J* = 85 Hz), 92.00, 86.91, 80.02, 65.98, 30.42, 28.31, 19.71, 16.74. **<sup>19</sup>F NMR** (471 MHz, CDCl<sub>3</sub>) δ -111.53. **HRMS** (ESI, m/z): calcd. for C<sub>18</sub>H<sub>22</sub>FNO<sub>3</sub> [M+Na]<sup>+</sup> 342.1476, found 342.1476.

**tert-butyl (6-(3,5-bis(trifluoromethyl)phenyl)-2-methyl-4-oxohex-5-yn-3-yl)carbamate (1v)**

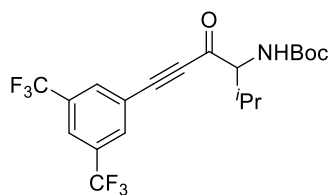

White solid, m.p. 95-97 °C, 55% yield.

**<sup>1</sup>H NMR** (500 MHz, CDCl<sub>3</sub>) δ 8.02 (d, *J* = 1.6 Hz, 2H), 7.96 (s, 1H), 5.13 (d, *J* = 9.0 Hz, 1H), 4.50 (d, *J* = 4.8 Hz, 1H), 2.48 (s, 1H), 1.46 (s, 9H), 1.10 (d, *J* = 6.9 Hz, 3H), 0.91 (d, *J* = 6.9 Hz, 3H). **<sup>13</sup>C NMR** (126 MHz, CDCl<sub>3</sub>) δ 186.72, 155.78, 132.93, 132.53 (q, *J* = 34.02 Hz), 124.17 (q, *J* = 3.78 Hz), 122.56 (q, *J* = 273.42 Hz), 122.20, 88.59, 88.29, 80.21, 65.97, 30.16, 28.26, 19.69, 16.75. **<sup>19</sup>F NMR** (471 MHz, CDCl<sub>3</sub>) δ -63.26. **HRMS** (ESI, *m/z*): calcd. for C<sub>20</sub>H<sub>21</sub>F<sub>6</sub>NO<sub>3</sub> [M+Na]<sup>+</sup> 460.1318, found 460.1314.

**tert-butyl (2-methyl-6-(naphthalen-1-yl)-4-oxohex-5-yn-3-yl)carbamate (1w)**

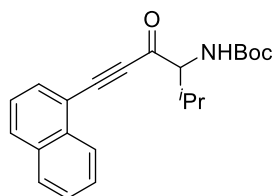

White solid, m.p. 80-82 °C, 48% yield.

**<sup>1</sup>H NMR** (500 MHz, CDCl<sub>3</sub>) δ 8.30 (d, *J* = 8.3 Hz, 1H), 7.97 (d, *J* = 8.2 Hz, 1H), 7.87 (dd, *J* = 11.4, 7.6 Hz, 2H), 7.64 (t, *J* = 7.0 Hz, 1H), 7.61 – 7.55 (m, 1H), 7.51 – 7.45 (m, 1H), 5.26 (d, *J* = 9.0 Hz, 1H), 4.62 (dd, *J* = 9.0, 3.9 Hz, 1H), 2.59 (qd, *J* = 10.6 Hz, 1H), 1.47 (s, 9H), 1.13 (d, *J* = 6.8 Hz, 3H), 0.95 (d, *J* = 6.9 Hz, 3H). **<sup>13</sup>C NMR** (126 MHz, CDCl<sub>3</sub>) δ 187.05, 155.89, 133.59, 133.05, 131.88, 128.61, 127.87, 127.03, 125.65, 125.18, 117.19, 92.46, 91.42, 79.99, 66.10, 30.75, 28.35, 19.80, 16.86. **HRMS** (ESI, *m/z*): calcd. for C<sub>22</sub>H<sub>25</sub>NO<sub>3</sub> [M+Na]<sup>+</sup> 374.1726, found 374.1724.

**benzyl (2-methyl-4-oxo-6-phenylhex-5-yn-3-yl)carbamate (1x)**

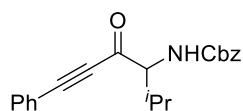

Yellow liquid, 70% yield.

**<sup>1</sup>H NMR** (500 MHz, CDCl<sub>3</sub>) δ 7.56 (d, *J* = 7.2 Hz, 2H), 7.46 (t, *J* = 7.5 Hz, 1H), 7.35 (td, *J* = 18.5, 17.1, 9.4 Hz, 7H), 5.46 (s, 1H), 5.13 (d, *J* = 4.4 Hz, 2H), 4.59 (dd, *J* = 9.0, 3.9 Hz, 1H), 2.53 (pd, *J* = 6.6, 3.8 Hz, 1H), 1.09 (d, *J* = 6.9 Hz, 3H), 0.89 (d, *J* = 6.9 Hz, 3H). **<sup>13</sup>C NMR** (126

MHz, CDCl<sub>3</sub>)  $\delta$  186.54, 156.48, 136.28, 133.24, 131.18, 128.73, 128.58, 128.23, 128.15, 119.51, 94.53, 86.60, 67.16, 66.41, 30.58, 19.74, 16.68. **HRMS** (ESI, m/z): calcd. for C<sub>21</sub>H<sub>21</sub>NO<sub>3</sub> [M+Na]<sup>+</sup> 358.1413, found 358.1417.

**tert-butyl (3-oxo-1-phenylhept-1-yn-4-yl)carbamate (1y)**

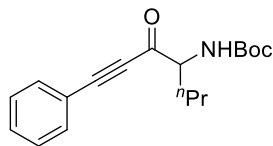

White solid, m.p. 105-107 °C, 48% yield.

**<sup>1</sup>H NMR** (500 MHz, CDCl<sub>3</sub>)  $\delta$  7.59 (d,  $J$  = 6.8 Hz, 2H), 7.47 (q,  $J$  = 5.9 Hz, 1H), 7.39 (q,  $J$  = 6.6, 6.1 Hz, 2H), 5.21 (d,  $J$  = 18.2 Hz, 1H), 4.51 (d,  $J$  = 11.6 Hz, 1H), 2.00 (tt,  $J$  = 10.8, 5.7 Hz, 1H), 1.74 – 1.61 (m, 1H), 1.56 – 1.31 (m, 11H), 1.07 – 0.89 (m, 3H). **<sup>13</sup>C NMR** (126 MHz, CDCl<sub>3</sub>)  $\delta$  187.18, 155.37, 133.09, 130.95, 128.60, 119.58, 94.00, 86.15, 79.80, 60.99, 33.77, 28.24, 18.48, 13.75. **HRMS** (ESI, m/z): calcd. for C<sub>18</sub>H<sub>23</sub>NO<sub>3</sub> [M+H]<sup>+</sup> 302.1760, found 302.1756.

**tert-butyl (1-cyclopentyl-2-oxo-4-phenylbut-3-yn-1-yl)carbamate (1z)**

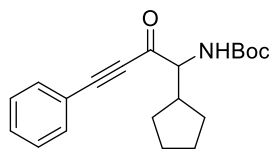

White solid, m.p. 101-103 °C, 38% yield.

**<sup>1</sup>H NMR** (500 MHz, CDCl<sub>3</sub>)  $\delta$  7.59 (d,  $J$  = 7.1 Hz, 2H), 7.51 – 7.44 (m, 1H), 7.40 (dt,  $J$  = 8.0, 4.1 Hz, 2H), 5.21 (d,  $J$  = 8.7 Hz, 1H), 4.53 (d,  $J$  = 12.2 Hz, 1H), 2.46 (h,  $J$  = 8.0 Hz, 1H), 1.91 – 1.81 (m, 1H), 1.67 (tt,  $J$  = 9.9, 5.5 Hz, 3H), 1.60 – 1.50 (m, 3H), 1.45 (s, 9H), 1.35 – 1.21 (m, 1H). **<sup>13</sup>C NMR** (126 MHz, CDCl<sub>3</sub>)  $\delta$  187.17, 155.66, 133.07, 130.90, 128.58, 119.64, 93.81, 86.66, 79.84, 63.83, 41.55, 29.20, 28.23, 27.44, 25.26, 25.01. **HRMS** (ESI, m/z): calcd. for C<sub>20</sub>H<sub>25</sub>NO<sub>3</sub> [M+H]<sup>+</sup> 328.1907, found 328.1913.

**tert-butyl (1-cyclohexyl-2-oxo-4-phenylbut-3-yn-1-yl)carbamate (1aa)**

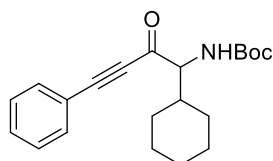

White solid, m.p. 108-110 °C, 25% yield.

**<sup>1</sup>H NMR** (500 MHz, CDCl<sub>3</sub>) δ 7.59 (d, *J* = 6.7 Hz, 2H), 7.47 (dd, *J* = 7.4, 2.8 Hz, 1H), 7.40 (t, *J* = 7.8 Hz, 2H), 5.20 (d, *J* = 9.0 Hz, 1H), 4.48 (d, *J* = 6.0 Hz, 1H), 2.09 (s, 1H), 1.84 – 1.74 (m, 3H), 1.67 (d, *J* = 12.9 Hz, 1H), 1.57 (d, *J* = 11.1 Hz, 1H), 1.46 (s, 9H), 1.27 (dd, *J* = 22.3, 12.8 Hz, 3H), 1.19 – 1.02 (m, 2H). **<sup>13</sup>C NMR** (126 MHz, CDCl<sub>3</sub>) δ 187.17, 155.66, 133.08, 130.93, 128.59, 119.61, 93.96, 86.73, 79.76, 65.65, 40.38, 29.94, 28.24, 27.21, 26.12, 26.01, 25.83. **HRMS** (ESI, *m/z*): calcd. for C<sub>21</sub>H<sub>27</sub>NO<sub>3</sub> [M+Na]<sup>+</sup> 364.1883, found 364.1889.

***tert*-butyl (2-oxo-1,4-diphenylbut-3-yn-1-yl)carbamate (1ab)**

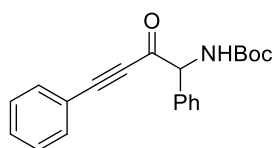

White solid, m.p. 110-112 °C, 40% yield.

**<sup>1</sup>H NMR** (500 MHz, CDCl<sub>3</sub>) δ 7.42 (qd, *J* = 10.0, 3.4 Hz, 7H), 7.34 (dd, *J* = 7.4, 4.5 Hz, 3H), 5.87 (s, 1H), 5.54 (d, *J* = 6.9 Hz, 1H), 1.43 (s, 9H). **<sup>13</sup>C NMR** (126 MHz, CDCl<sub>3</sub>) δ 183.18, 154.74, 135.88, 133.04, 131.05, 128.98, 128.63, 128.56, 127.96, 119.37, 95.60, 86.16, 80.12, 65.78, 28.24. **HRMS** (ESI, *m/z*): calcd. for C<sub>21</sub>H<sub>21</sub>NO<sub>3</sub> [M+Na]<sup>+</sup> 358.1413, found 358.1419.

**4. General procedure for the synthesis of product**

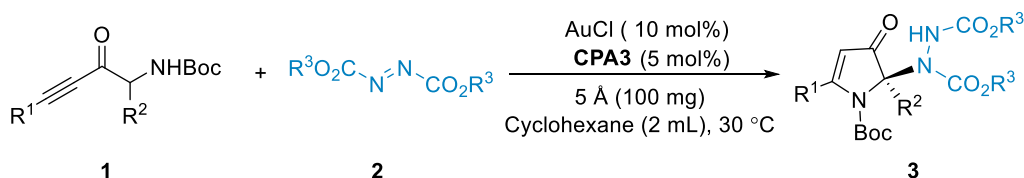

To a 4 mL vial was added **1** (0.12 mmol, 1.2 equiv.), which was taken into the glovebox, where **CPA3** (0.005 mmol, 5 mol%), AuCl (0.01 mmol, 10 mol%), 5 Å (100 mg), diethyl (E)-diazene-1,2-dicarboxylate (0.10 mmol, 1.0 equiv.) and cyclohexane (2 mL) were added. The reaction mixture was taken outside the glovebox. The vial was then sealed and the reaction mixture was allowed to stir at 30 °C for 18 h. The crude reaction mixture was directly purified by silica gel column chromatography with hexanes/ethyl acetate (8:1 v/v) as eluent to afford the product **3**.

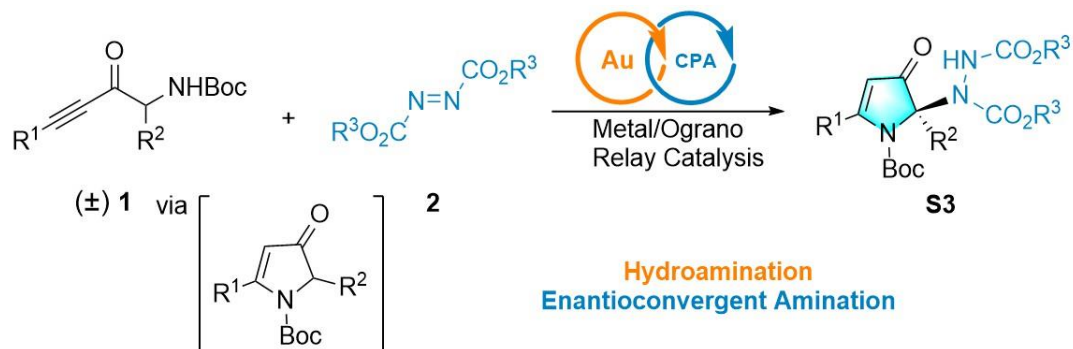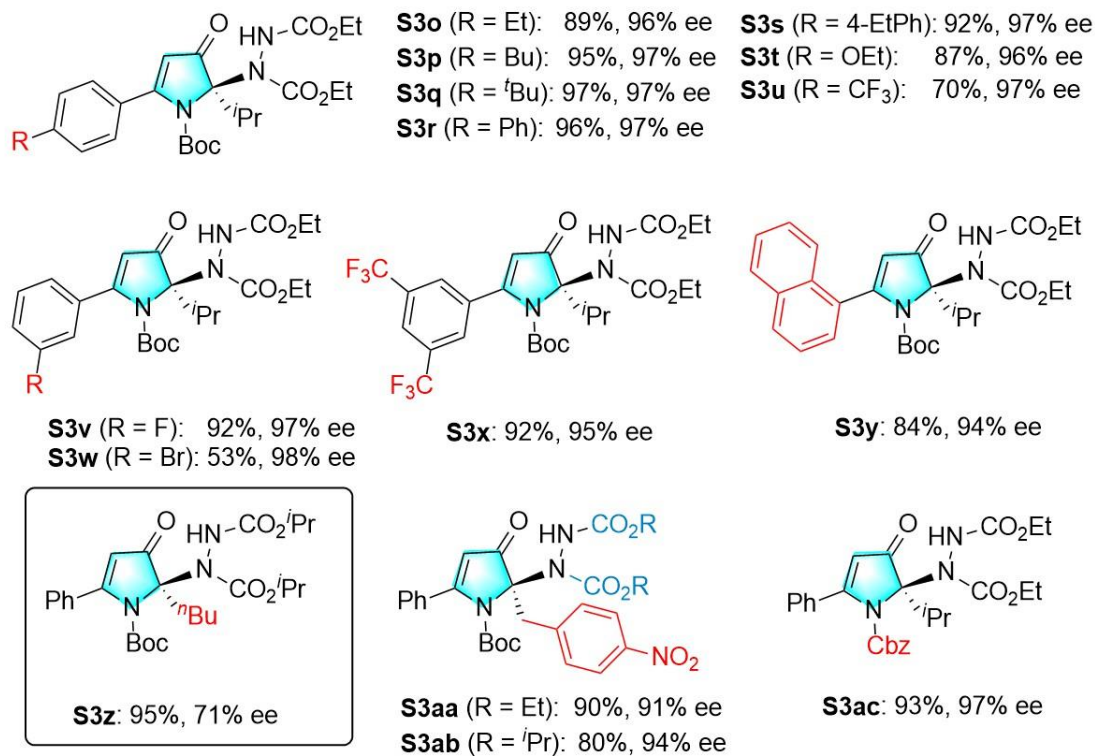

**Scheme S1.** Substrate scope for gold and CPA relay reaction

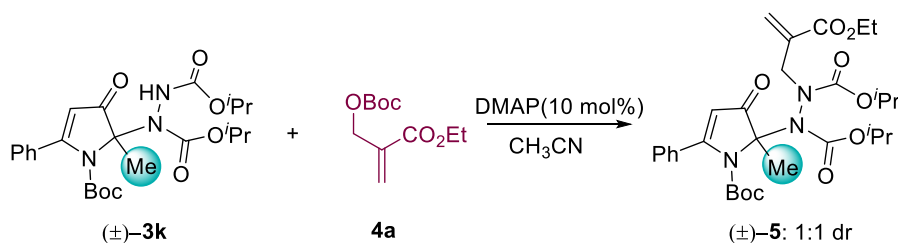

To a 4 mL vial was added **3k** (0.1 mmol), DMAP (10 mol%), CH<sub>3</sub>CN (2 mL) and ethyl 2-((tert-butoxycarbonyl)oxy)methylacrylate (0.3 mmol). The reaction mixture was allowed to stir at 30 °C for 6 h. The crude reaction mixture was directly purified by silica gel column chromatography with hexanes/ethyl acetate (8:1 v/v) as eluent to afford the product **5** (90%

yield, 1:1 dr).

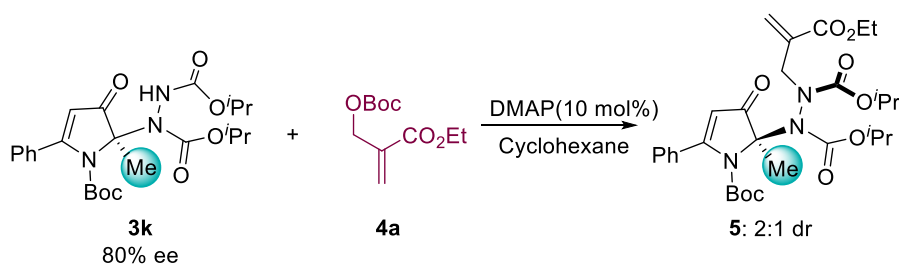

To a 4 mL vial was added **3k** (0.1 mmol), DMAP (10 mol%), cyclohexane (2 mL) and ethyl 2-(((tert-butoxycarbonyl)oxy)methyl)acrylate (0.3 mmol). The reaction mixture was allowed to stir at 30 °C for 6 h. The crude reaction mixture was directly purified by silica gel column chromatography with hexanes/ethyl acetate (8:1 v/v) as eluent to afford the product **5** (92% yield, 2:1 dr, 80% ee, 80% ee).

**Table S1.** Reaction conditions screening<sup>a</sup>

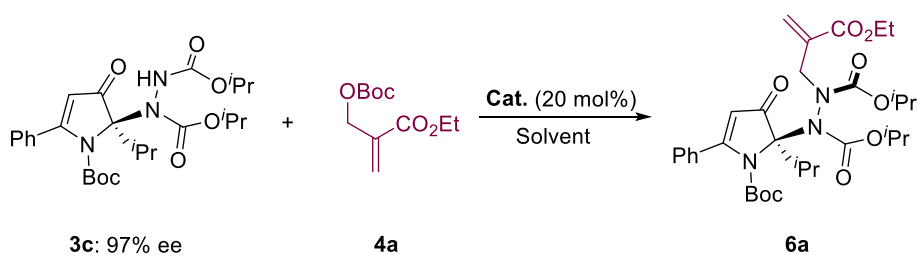

| Entry          | Cat.                    | Solvent           | yield (%) <sup>b</sup> | dr <sup>c</sup> | ee (%) <sup>d</sup> |
|----------------|-------------------------|-------------------|------------------------|-----------------|---------------------|
| 1              | DMAP                    | cyclohexane       | 92                     | > 98:2          | 97                  |
| 2              | DMAP                    | toluene           | 88                     | 8:1             | 97                  |
| 3              | DMAP                    | THF               | < 5                    | /               | /                   |
| 4              | DMAP                    | CHCl <sub>3</sub> | 76                     | 6:1             | 97                  |
| 5              | Quinine                 | cyclohexane       | < 5                    | /               | /                   |
| 6              | Quinidine               | cyclohexane       | < 5                    | /               | /                   |
| 7              | (DHQ) <sub>2</sub> PHAL | cyclohexane       | < 5                    | /               | /                   |
| 8 <sup>e</sup> | DMAP                    | cyclohexane       | 75                     | > 98:2          | 97                  |
| 9 <sup>f</sup> | DMAP                    | cyclohexane       | 79                     | > 98:2          | 97                  |

<sup>a</sup> Reaction conditions: **3c** (1.0 equiv., 0.05 mmol), **4a** (3.0 equiv., 0.15 mmol), **Cat.** (20 mol%), and solvent (0.5 M), 30 °C, N<sub>2</sub>, 6 hours. <sup>b</sup> Isolated yield. <sup>c</sup> Determined by <sup>1</sup>H NMR. <sup>d</sup> Determined by HPLC. <sup>e</sup> 2.0 equiv. instead of 3.0 equiv. **4a**. <sup>f</sup> 10 mol% instead of 20 mol% DMAP.



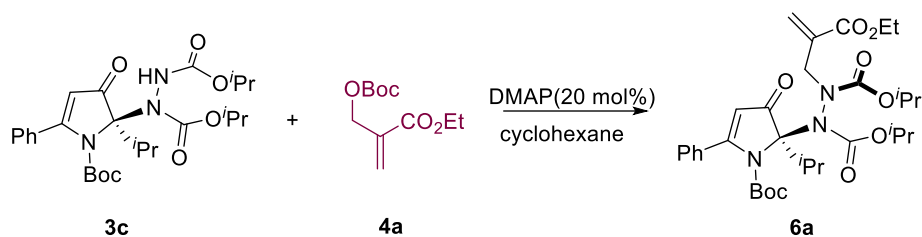

To a 4 mL vial was added **3c** (0.1 mmol), DMAP (20 mol%), cyclohexane (2 mL) and ethyl 2-(((tert-butoxycarbonyl)oxy)methyl)acrylate (0.3 mmol). The reaction mixture was allowed to stir at 30 °C for 6 h. The crude reaction mixture was directly purified by silica gel column chromatography with hexanes/ethyl acetate (8:1 v/v) as eluent to afford the product **6a** (92% yield, > 98:2 dr).

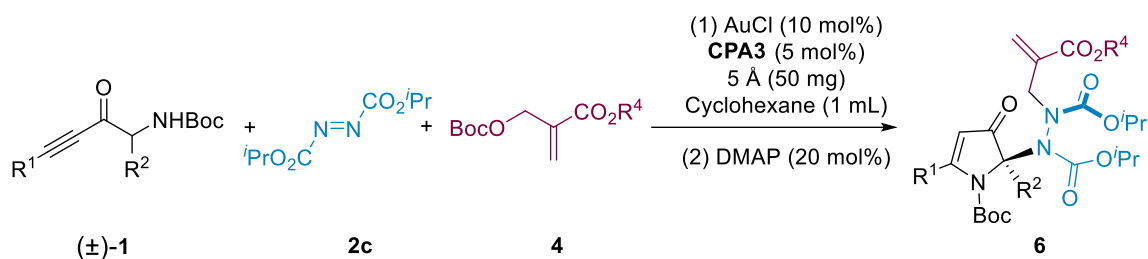

To a 4 mL vial was added  $\alpha$ -amino-ynone (0.12 mmol, 1.2 equiv.), which was taken into the glovebox, where **CPA3** (0.005 mmol, 5 mol%), AuCl (0.01 mmol, 10 mol%), 5 Å (100 mg), diisopropyl (E)-diazene-1,2-dicarboxylate (0.10 mmol, 1.0 equiv.) and cyclohexane (2 mL) were added. The reaction mixture was taken outside the glovebox. The vial was then sealed and the reaction mixture was allowed to stir at 30 °C for 18 h. Then compound **4** (0.3 mmol, 3.0 equiv.) and DMAP (20 mol%) were added. The reaction mixture was allowed to stir at 30 °C until TLC indicated the reaction was completed. The solvent was removed under reduced pressure. The residue was purified by silica gel column chromatography with hexane/ethyl acetate (10:1 v/v) as eluent to afford product **6**.

## 5. One-mmol-scale reaction

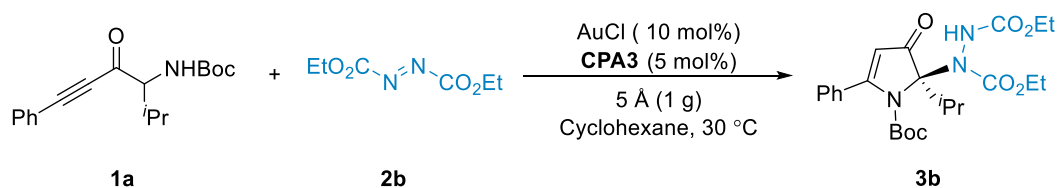

To a 50 mL vial was added **1a** (1.2 mmol, 1.2 equiv.), which was taken into the glovebox, where

**CPA3** (0.05 mmol, 5 mol%), AuCl (0.1 mmol, 10 mol%), 5Å (1 g), diethyl (E)-diazene-1,2-dicarboxylate (1.0 mmol, 1.0 equiv.) and cyclohexane (20 mL) were added. The reaction mixture was taken outside the glovebox. The vial was then sealed and the reaction mixture was allowed to stir at 30 °C for 24 h. The solvent was removed under reduced pressure. Then the residue was directly purified by silica gel column chromatography with hexanes/ethyl acetate (8:1 v/v) as eluent to afford the diethyl 1-(1-(tert-butoxycarbonyl)-2-isopropyl-3-oxo-5-phenyl-2,3-dihydro-1H-pyrrol-2-yl)hydrazine-1,2-dicarboxylate (451 mg, 95% yield, 97% ee).

## 6. Synthetic Transformations of Product

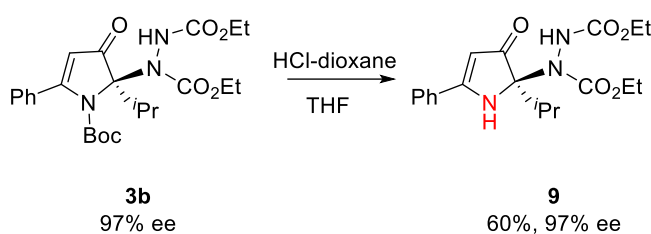

To the tube was added **3b** (1.0 equiv., 0.2 mmol) and THF (2 mL). Then HCl-dioxane (5.0 equiv., 1.0 mmol) was added to the mixture solution and stirred at 30 °C for 20 h. After complete consumption of the starting material. The mixture solution was quenched by aq. NaOH and extracted with EtOAc. The combined organic phase washed with brine, dried over Na<sub>2</sub>SO<sub>4</sub>, and concentrated in vacuum. The crude reaction mixture was purified by silica gel column chromatography with hexanes/ethyl acetate (5:1 v/v) as eluent to afford the diethyl 1-(2-isopropyl-3-oxo-5-phenyl-2,3-dihydro-1H-pyrrol-2-yl)hydrazine-1,2-dicarboxylate (44 mg, 60% yield).

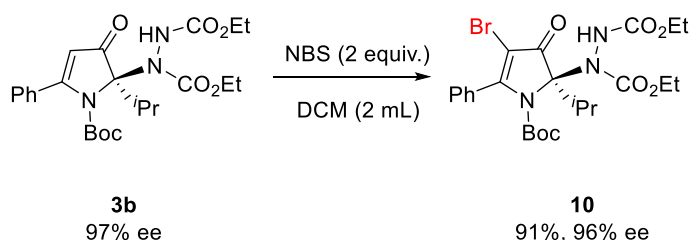

The NBS (2.0 equiv., 0.4 mmol) was dissolved in DCM (2 mL) containing compound **3b** (1.0 equiv., 0.2 mmol). The resulting mixture was stirred for 1 h at 30 °C. Subsequently, the solvent was removed under reduced to obtain a yellow oil residue. The residue was purified by column chromatography on silica gel (PE: EA=10: 1) to afford product as a white solid (91% yield, 96%

ee).

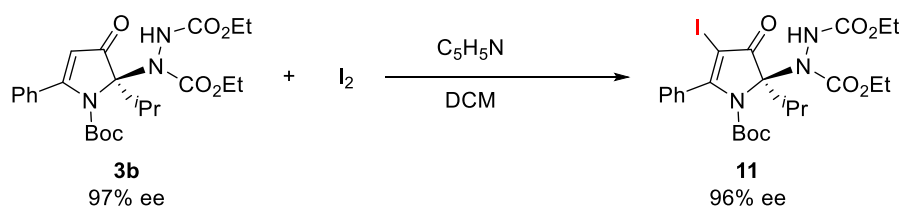

The **3b** (1.0 equiv., 0.2 mmol) and pyridine (1.2 equiv., 0.24 mmol) were dissolved in DCM (2 mL). Then iodine (2.0 equiv., 0.4 mmol) was added to the solution. The resulting mixture was stirred at rt. After complete consumption of the starting material. The mixture solution was quenched by aq. Na<sub>2</sub>SO<sub>3</sub> and extracted with DCM. The combined organic phase washed with brine, dried over Na<sub>2</sub>SO<sub>4</sub>, and concentrated in vacuum. The crude reaction mixture was purified by silica gel column chromatography with hexanes/ethyl acetate (5:1 v/v) as eluent to afford product as white solid (88% yield, 96% ee).

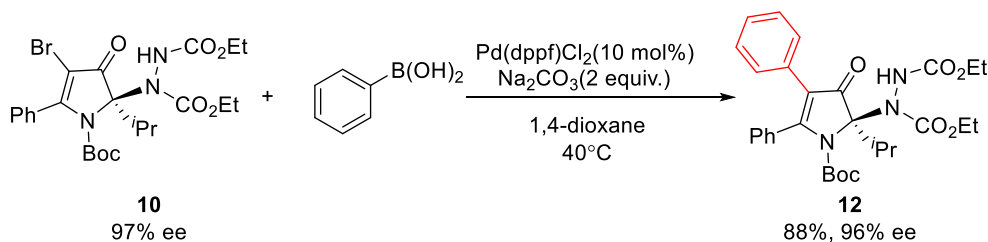

To a solution of **10** (1.0 equiv., 2 mmol) in 1,4-dioxane (2 mL) was added 2 M aqueous Na<sub>2</sub>CO<sub>3</sub> (2.0 equiv., 0.4 mmol), boric acid (2.0 equiv., 0.4 mmol) and PdCl<sub>2</sub>(dppf) (10% mol). The flask was flushed with nitrogen gas. The reaction mixture was allowed to stir at 40 °C until the starting material was complete consumption. The 1,4-dioxane was evaporated, and the residue was extracted with EtOAc (3 × 5 mL) and washed with brine, dried over sodium sulfate and concentrated in vacuum. The residue was purified by column chromatography to afford product **12** (88% yield, 96% ee).

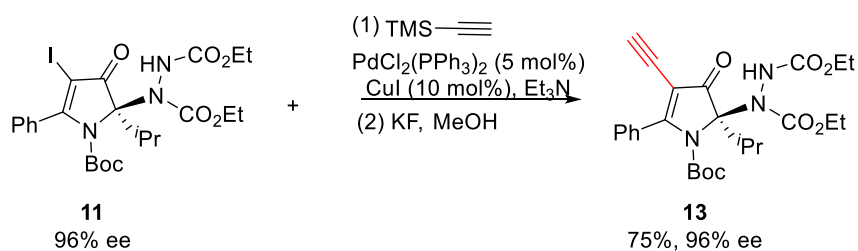

Palladium(II)bis(triphenylphosphine) dichloride (10 mol%), **11** (1.0 equiv., 0.2 mmol), and cuprous iodide (1.2 equiv., 0.24 mmol) were added to an oven-dried Schlenk tube equipped

with a stir bar. The tube was then sealed, evacuated, and backfilled with nitrogen three times using standard Schlenk techniques. Et<sub>3</sub>N (2 mL) and trimethylsilylacetylene (3.0 equiv., 0.6 mmol) were sequentially added by syringe at ambient temperature. The resulting mixture was vigorously stirred and heated at 40 °C (oil bath) for 24 h. After the mixture was cooled to room temperature, water (10 mL) was added. The resulting mixture was extracted with ethyl acetate (5 mL × 3). The combined organic layers were then washed with brine, dried over Na<sub>2</sub>SO<sub>4</sub>, and concentrated in vacuum. The residue was used without further purification. Then the mixture was added KF (2 equiv., 0.4 mmol) and MeOH (2 mL), and the resulting mixture was stirred at room temperature until TLC indicated the reaction was complete. The reaction mixture was diluted with water (5 mL) and extracted with ethyl acetate (5 mL × 3). The combined organic phase washed with brine, dried over Na<sub>2</sub>SO<sub>4</sub>, and concentrated in vacuum. The residue was purified by column chromatography to give product **13** (70% yield, 96% ee).

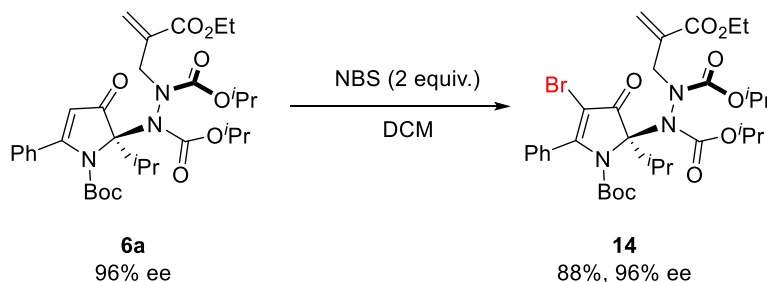

The NBS (0.4 mmol, 47.1 mg) was dissolved in DCM (2 mL) containing compound **6a** (0.2 mmol, 123 mg). The resulting mixture was stirred for 1 h at 30 °C. Subsequently, the solvent was removed under reduced to obtain a yellow oil residue. The residue was purified by column chromatography on silica gel (PE: EA=10: 1) to afford product as a white solid (88% yield, 96% ee).

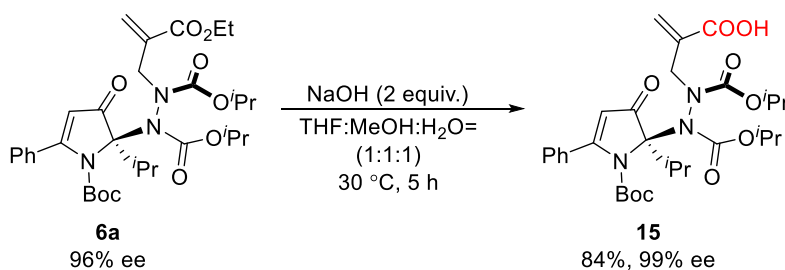

The NaOH (0.4 mmol, 16 mg) was dissolved in THF:MeOH:H<sub>2</sub>O (1:1:1=0.5 mL:0.5 mL:0.5 mL) containing compound **6a** (0.2 mmol, 123 mg). The resulting mixture was stirred for 5 h at 30 °C. Subsequently, the volatiles were evaporated under reduced pressure. The residual

aqueous solution was acidified with 3N HCl solution (pH < 1) and extracted with ethyl acetate. The combined organic layers were dried with Na<sub>2</sub>SO<sub>4</sub>, filtered and concentrated under reduced pressure. The residue was purified by column chromatography on silica gel (PE:EA=5:1) to afford product as a white solid (84% yield, 99% ee).

## 7. NMR revealed the catalytic reaction profile

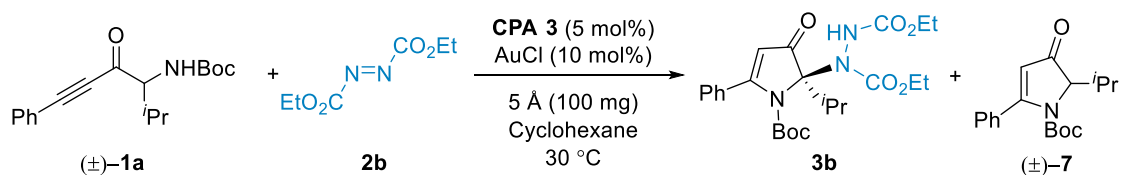

To a 4 mL vial was added **1a** (0.12 mmol, 1.2 equiv.), which was taken into the glovebox, where **CPA3** (0.005 mmol, 5mol%), AuCl (0.01 mmol, 10 mol%), 5Å (100 mg), diethyl (E)-diazene-1,2-dicarboxylate (0.1 mmol, 1.0 equiv.) and cyclohexane (2 mL) were added. The reaction mixture was taken outside the glovebox. The vial was then sealed and the reaction mixture was allowed to stir at 30 °C for the given time. The reaction mixture was filtered through silica gel and the solvent was removed under reduced pressure. Real time content was determined by <sup>1</sup>H NMR using 1,1,2,2-tetrachloroethane as the internal standard.

| Entry | Time (h) | <b>1a</b> (%) | <b>7</b> (%) | <b>3b</b> (%) |
|-------|----------|---------------|--------------|---------------|
| 1     | 0        | 120           | 0            | 0             |
| 2     | 0.15     | 70            | 50           | 0             |
| 3     | 0.30     | 45            | 75           | 0             |
| 4     | 0.45     | 10            | 95           | 10            |
| 5     | 1        | 0             | 78           | 30            |
| 6     | 2        | 0             | 60           | 55            |
| 7     | 4        | 0             | 48           | 69            |
| 8     | 6        | 0             | 35           | 77            |
| 9     | 8        | 0             | 30           | 83            |
| 10    | 12       | 0             | 28           | 88            |
| 11    | 16       | 0             | 23           | 92            |
| 12    | 18       | 0             | 17           | 97            |

## 8. Control reactions and the stepwise reactions

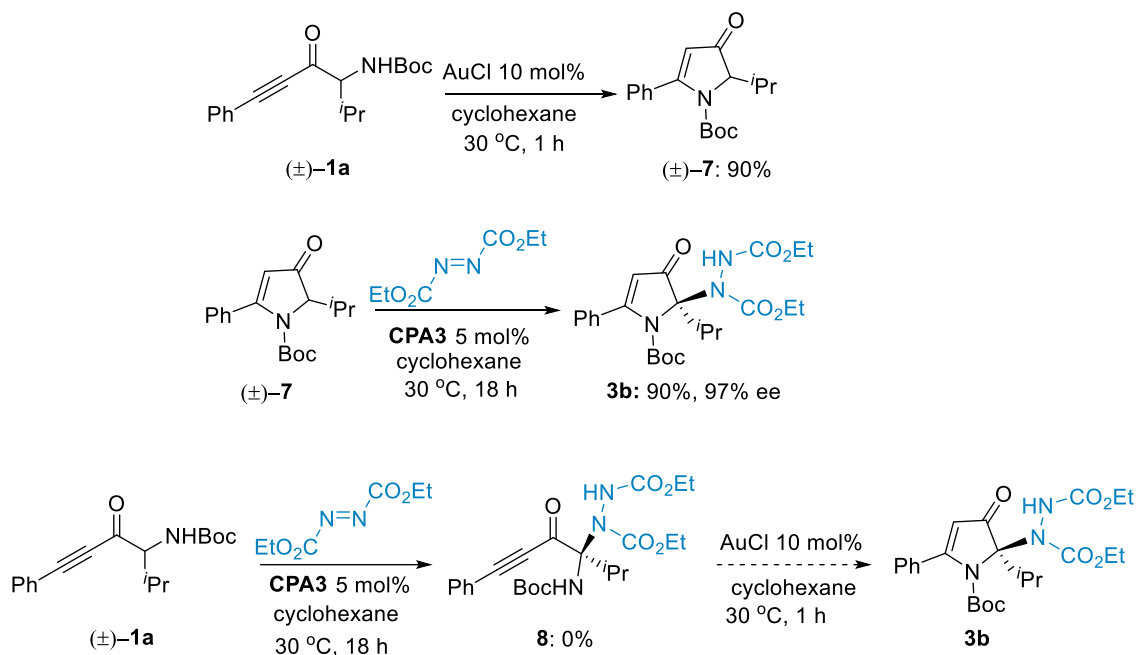

To a 4 mL vial was added tert-butyl (2-methyl-4-oxo-6-phenylhex-5-yn-3-yl)carbamate (**1a**) (0.12 mmol), which was taken into the glovebox, where AuCl (0.01 mmol, 10 mol %) and cyclohexane (2 mL) were added. The reaction mixture was stirred at 30 °C for 1 h. The crude reaction mixture was directly purified by silica gel column chromatography with hexane and ethyl acetate (5:1 v/v) as eluent to afford the product **7** in 90% yield.

To a 4 mL vial was added **7** (0.1 mmol, 1.2 equiv.), which was taken into the glovebox, where CPA3 (5 mol%), 5Å (100 mg) and cyclohexane (2 mL) were added. Then diethyl (E)-diazene-1,2-dicarboxylate (1.0 equiv.) was added. The reaction mixture was stirred at 30 °C for 18 h. The crude reaction mixture was directly purified by silica gel column chromatography with hexane and ethyl acetate (5:1 v/v) as eluent to afford the product **3b** (90% yield, 97% ee).

To a 4 mL vial was added the tert-butyl (2-methyl-4-oxo-6-phenylhex-5-yn-3-yl)carbamate (**1a**) (0.12 mmol, 1.2 equiv.), CPA3 (0.005 mmol, 5mol%), 5Å (100 mg), diethyl (E)-diazene-1,2-dicarboxylate (0.10 mmol, 1.0 equiv.) and cyclohexane (2 mL). The vial was then sealed and the reaction mixture was allowed to stir at 30 °C for 18 h. The reaction mixture was filtered through silica gel and the solvent was removed under reduced pressure. The residue was checked by crude <sup>1</sup>H NMR. No target material was obtained by crude <sup>1</sup>H NMR.

## 9. Characterization of products

### *tert*-butyl 2-isopropyl-3-oxo-5-phenyl-2,3-dihydro-1H-pyrrole-1-carboxylate (7)

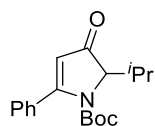

White solid, m.p. 108-110 °C, 90% yield.

**<sup>1</sup>H NMR** (500 MHz, CDCl<sub>3</sub>) δ 7.44 (q, *J* = 6.5, 5.8 Hz, 5H), 5.60 (s, 1H), 4.19 (d, *J* = 3.6 Hz, 1H), 2.62 (s, 1H), 1.24 (s, 9H), 1.18 (d, *J* = 7.2 Hz, 3H), 1.03 (d, *J* = 7.1 Hz, 3H). **<sup>13</sup>C NMR** (126 MHz, CDCl<sub>3</sub>) δ 200.74, 172.86, 150.34, 133.29, 130.08, 127.99, 127.07, 113.55, 82.57, 71.53, 32.07, 27.64, 17.18, 17.10. **HRMS** (ESI, *m/z*): calcd. for C<sub>18</sub>H<sub>23</sub>NO<sub>3</sub> [M+Na]<sup>+</sup> 324.1567, found 324.1569.

### dibenzyl (*R*) 1-(1-(*tert*-butoxycarbonyl)-2-isopropyl-3-oxo-5-phenyl-2,3-dihydro-1H-pyrrol-2-yl)hydrazine-1,2-dicarboxylate (3a)

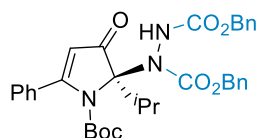

White solid, m.p. 73-75 °C, 93% yield.

**<sup>1</sup>H NMR** (500 MHz, CDCl<sub>3</sub>) δ 7.59 – 7.28 (m, 10H), 7.26 – 7.14 (m, 5H), 5.50 (s, 1H), 5.18 (s, 2H), 5.10 (s, 2H), 2.97 (p, *J* = 6.8 Hz, 1H), 1.13 – 0.97 (m, 15H). **<sup>13</sup>C NMR** (126 MHz, CDCl<sub>3</sub>) δ 193.24, 168.46, 155.17, 150.23, 136.21, 135.39, 133.84, 129.58, 128.40, 128.25, 128.16, 127.96, 126.60, 111.42, 86.46, 83.18, 68.84, 67.41, 32.32, 27.30, 17.08, 14.80. **HRMS** (ESI, *m/z*): calcd. for C<sub>34</sub>H<sub>37</sub>N<sub>3</sub>O<sub>7</sub> [M+Na]<sup>+</sup> 599.2632, found 599.2635.

**Specific Rotation:** [α]<sup>25</sup><sub>D</sub> = -89.6 (*c* = 1.0, CHCl<sub>3</sub>). 93% ee (HPLC condition: Chiralcel AD column, *n*-Hexane/*i*-PrOH = 80:20, flow rate = 1.0 mL/min, wavelength = 254 nm, *t*<sub>R</sub> = 7.718 min for minor isomer, *t*<sub>R</sub> = 9.913 min for major isomer).

### diethyl (*R*) 1-(1-(*tert*-butoxycarbonyl)-2-isopropyl-3-oxo-5-phenyl-2,3-dihydro-1H-pyrrol-2-yl)hydrazine-1,2-dicarboxylate (3b)

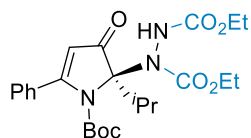

White solid, m.p. 111-113 °C, 96% yield.

**<sup>1</sup>H NMR** (500 MHz, CDCl<sub>3</sub>) δ 7.42 – 7.31 (m, 5H), 5.60 (s, 1H), 4.18 (dddt, *J* = 37.2, 30.3, 10.8, 7.5 Hz, 4H), 2.97 (p, *J* = 6.9 Hz, 1H), 1.67 (s, 1H), 1.31 (dt, *J* = 11.8, 5.1 Hz, 3H), 1.21 (t, *J* = 7.1 Hz, 3H), 1.18 – 0.89 (m, 15H). **<sup>13</sup>C NMR** (126 MHz, CDCl<sub>3</sub>) δ 193.33, 168.27, 155.17, 150.27, 133.98, 129.60, 128.02, 126.55, 111.42, 86.56, 83.02, 63.09, 61.54, 32.42, 27.29, 17.08, 14.74, 14.44, 14.11. **HRMS** (ESI, *m/z*): calcd. for C<sub>24</sub>H<sub>33</sub>N<sub>3</sub>O<sub>7</sub> [M+Na]<sup>+</sup> 498.2211, found 498.2214.

**Specific Rotation:** [α]<sub>D</sub><sup>25</sup> = -93.8 (*c* = 1.0, CHCl<sub>3</sub>). 97% ee (HPLC condition: Chiralcel OD column, *n*-Hexane/*i*-PrOH = 80:20, flow rate = 1.0 mL/min, wavelength = 254 nm, *t*<sub>R</sub> = 4.488 min for major isomer, *t*<sub>R</sub> = 5.492 min for minor isomer).

**diisopropyl (R) 1-(1-(tert-butoxycarbonyl)-2-isopropyl-3-oxo-5-phenyl-2,3-dihydro-1H-pyrrol-2-yl)hydrazine-1,2-dicarboxylate (3c)**

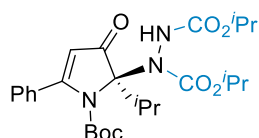

White solid, m.p. 100-102 °C, 92% yield.

**<sup>1</sup>H NMR** (500 MHz, CDCl<sub>3</sub>) δ 7.43 – 7.33 (m, 5H), 7.22 (s, 1H), 5.59 (s, 1H), 5.03 (h, *J* = 6.0 Hz, 1H), 4.89 (h, *J* = 6.2 Hz, 1H), 3.05 – 2.90 (m, 1H), 1.31 (td, *J* = 11.8, 10.8, 6.4 Hz, 6H), 1.21 (q, *J* = 5.2, 4.7 Hz, 6H), 1.15 – 1.02 (m, 15H). **<sup>13</sup>C NMR** (126 MHz, CDCl<sub>3</sub>) δ 193.49, 168.08, 154.89, 154.59, 150.18, 134.02, 129.56, 128.02, 126.54, 111.50, 86.62, 82.88, 71.30, 69.08, 32.59, 27.30, 21.71, 17.12, 14.73. **HRMS** (ESI, *m/z*): calcd. for C<sub>26</sub>H<sub>37</sub>N<sub>3</sub>O<sub>7</sub> [M+Na]<sup>+</sup> 526.2524, found 526.2524.

**Specific Rotation:** [α]<sub>D</sub><sup>25</sup> = -47.1 (*c* = 1.0, CHCl<sub>3</sub>). 97% ee (HPLC condition: Chiralcel AD column, *n*-Hexane/*i*-PrOH = 80:20, flow rate = 1.0 mL/min, wavelength = 254 nm, *t*<sub>R</sub> = 3.858 min for minor isomer, *t*<sub>R</sub> = 4.288 min for major isomer).

**diethyl (R) 1-(1-(tert-butoxycarbonyl)-2-isopropyl-3-oxo-5-(p-tolyl)-2,3-dihydro-1H-pyrrol-2-yl)hydrazine-1,2-dicarboxylate (3d)**

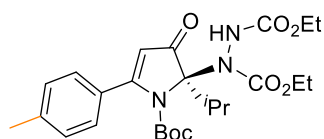



White solid, m.p. 117-119 °C, 87% yield.

**<sup>1</sup>H NMR** (500 MHz, CDCl<sub>3</sub>) δ 7.34 (s, 1H), 7.26 – 7.17 (m, 4H), 5.57 (s, 1H), 4.30 – 4.02 (m, 4H), 2.96 (p, *J* = 6.8 Hz, 1H), 2.38 (s, 3H), 1.91 (s, 1H), 1.29 (d, *J* = 17.5 Hz, 3H), 1.20 (t, *J* = 7.1 Hz, 3H), 1.07 (d, *J* = 22.9 Hz, 15H). **<sup>13</sup>C NMR** (126 MHz, CDCl<sub>3</sub>) δ 193.35, 168.55, 155.19, 150.41, 139.97, 131.04, 128.62, 126.55, 111.12, 86.68, 82.97, 63.09, 61.55, 32.53, 27.10, 21.18, 17.11, 14.79, 14.44, 14.11. **HRMS** (ESI, *m/z*): calcd. for C<sub>25</sub>H<sub>35</sub>N<sub>3</sub>O<sub>7</sub> [M+H]<sup>+</sup> 490.2548, found 490.2546.

**Specific Rotation:** [α]<sub>D</sub><sup>25</sup> = -66.0 (*c* = 1.0, CHCl<sub>3</sub>). 95% ee (HPLC condition: Chiralcel OD column, *n*-Hexane/*i*-PrOH = 80:20, flow rate = 1.0 mL/min, wavelength = 254 nm, *t*<sub>R</sub> = 4.298 min for major isomer, *t*<sub>R</sub> = 5.285 min for minor isomer).

**diethyl (R) 1-(1-(tert-butoxycarbonyl)-2-isopropyl-5-(4-methoxyphenyl)-3-oxo-2,3-dihydro-1H-pyrrol-2-yl)hydrazine-1,2-dicarboxylate (3e)**

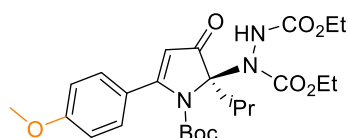

Yellow liquid, 83% yield.

**<sup>1</sup>H NMR** (500 MHz, CDCl<sub>3</sub>) δ 7.30 (d, *J* = 8.7 Hz, 2H), 6.92 (d, *J* = 8.7 Hz, 2H), 5.57 (s, 1H), 4.33 – 4.02 (m, 4H), 3.84 (s, 3H), 2.95 (p, *J* = 6.8 Hz, 1H), 1.85 (s, 1H), 1.30 (t, *J* = 7.2 Hz, 3H), 1.22 – 1.17 (m, 3H), 1.16 – 0.96 (m, 15H). **<sup>13</sup>C NMR** (126 MHz, CDCl<sub>3</sub>) δ 193.32, 168.26, 161.21, 155.21, 150.52, 128.15, 126.14, 113.60, 110.80, 86.87, 82.93, 63.09, 61.56, 55.41, 32.61, 27.42, 17.13, 14.85, 14.44, 14.10. **HRMS** (ESI, *m/z*): calcd. for C<sub>25</sub>H<sub>35</sub>N<sub>3</sub>O<sub>8</sub> [M+Na]<sup>+</sup> 528.2316, found 528.232.

**Specific Rotation:** [α]<sub>D</sub><sup>25</sup> = -33.0 (*c* = 1.0, CHCl<sub>3</sub>). 96% ee (HPLC condition: Chiralcel OD column, *n*-Hexane/*i*-PrOH = 80:20, flow rate = 1.0 mL/min, wavelength = 254 nm, *t*<sub>R</sub> = 5.142 min for major isomer, *t*<sub>R</sub> = 6.545 min for minor isomer).

**diethyl (R) 1-(1-(tert-butoxycarbonyl)-5-(4-fluorophenyl)-2-isopropyl-3-oxo-2,3-dihydro-1H-pyrrol-2-yl)hydrazine-1,2-dicarboxylate (3f)**

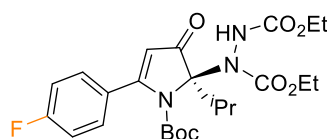

White solid, m.p. 59-61 °C, 95% yield.

**<sup>1</sup>H NMR** (500 MHz, CDCl<sub>3</sub>) δ 7.36 (t, *J* = 4.5 Hz, 2H), 7.21 (s, 1H), 7.10 (t, *J* = 7.4 Hz, 2H), 5.73 – 5.48 (m, 1H), 4.34 – 4.06 (m, 4H), 3.11 – 2.82 (m, 1H), 2.08 (s, 1H), 1.32 (d, *J* = 6.2 Hz, 3H), 1.21 (t, *J* = 5.8 Hz, 3H), 1.08 (dd, *J* = 42.2, 4.7 Hz, 15H). **<sup>13</sup>C NMR** (126 MHz, CDCl<sub>3</sub>) δ 193.14, 167.10, 163.55 (d, *J* = 250.74 Hz), 155.15, 150.15, 130.00, 128.54 (d, *J* = 7.56 Hz), 115.17 (d, *J* = 21.42 Hz), 111.51 (d, *J* = 13.86 Hz), 86.66, 83.27, 63.12, 61.59, 32.37, 27.37, 17.03, 14.73, 14.41, 14.09. **<sup>19</sup>F NMR** (471 MHz, CDCl<sub>3</sub>) δ -110.02. **HRMS** (ESI, *m/z*): calcd. for C<sub>24</sub>H<sub>32</sub>FN<sub>3</sub>O<sub>7</sub> [M+Na]<sup>+</sup> 516.2116, found 516.2118.

**Specific Rotation:** [α]<sup>25</sup><sub>D</sub> = -53.3 (*c* = 1.0, CHCl<sub>3</sub>). 97% ee (HPLC condition: Chiralcel OD column, *n*-Hexane/*i*-PrOH = 90:10, flow rate = 1.0 mL/min, wavelength = 254 nm, *t*<sub>R</sub> = 6.587 min for major isomer, *t*<sub>R</sub> = 8.672 min for minor isomer).

**diethyl (*R*) 1-(1-(tert-butoxycarbonyl)-2-isopropyl-3-oxo-5-(*m*-tolyl)-2,3-dihydro-1H-pyrrol-2-yl)hydrazine-1,2-dicarboxylate (3g)**

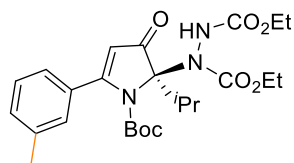

Yellow liquid, 94% yield.

**<sup>1</sup>H NMR** (500 MHz, CDCl<sub>3</sub>) δ 7.36 (s, 1H), 7.27 (d, *J* = 7.8 Hz, 1H), 7.22 (d, *J* = 7.8 Hz, 1H), 7.18 – 7.12 (m, 2H), 5.58 (s, 1H), 4.31 – 4.05 (m, 4H), 2.97 (p, *J* = 6.6 Hz, 1H), 2.38 (s, 3H), 2.05 (s, 1H), 1.34 – 1.28 (m, 3H), 1.21 (t, *J* = 7.1 Hz, 3H), 1.15 – 1.00 (m, 15H). **<sup>13</sup>C NMR** (126 MHz, CDCl<sub>3</sub>) δ 193.42, 168.58, 155.19, 150.33, 137.69, 133.83, 130.31, 127.97, 127.11, 123.73, 111.19, 86.53, 82.91, 63.11, 61.55, 32.42, 27.29, 21.09, 17.10, 14.73, 14.44, 14.10. **HRMS** (ESI, *m/z*): calcd. for C<sub>25</sub>H<sub>35</sub>N<sub>3</sub>O<sub>7</sub> [M+H]<sup>+</sup> 490.2548, found 490.2552.

**Specific Rotation:** [α]<sup>25</sup><sub>D</sub> = -44.3 (*c* = 1.0, CHCl<sub>3</sub>). 96% ee (HPLC condition: Chiralcel OD column, *n*-Hexane/*i*-PrOH = 90:10, flow rate = 1.0 mL/min, wavelength = 254 nm, *t*<sub>R</sub> = 6.318 min for major isomer, *t*<sub>R</sub> = 8.210 min for minor isomer).

**diethyl (*R*) 1-(1-(tert-butoxycarbonyl)-5-(3-chlorophenyl)-2-isopropyl-3-oxo-2,3-dihydro-1H-pyrrol-2-yl)hydrazine-1,2-dicarboxylate (3h)**

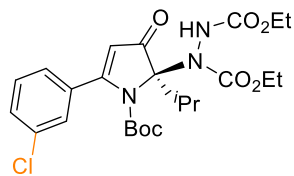

White solid, m.p. 69-72 °C, 81% yield.

**<sup>1</sup>H NMR** (500 MHz, CDCl<sub>3</sub>) δ 7.39 (d, *J* = 8.2 Hz, 1H), 7.33 (d, *J* = 5.8 Hz, 2H), 7.26 (t, *J* = 9.0 Hz, 1H), 5.61 (s, 1H), 4.37 – 4.03 (m, 4H), 2.97 (p, *J* = 6.8 Hz, 1H), 1.88 (s, 1H), 1.31 (d, *J* = 6.9 Hz, 3H), 1.22 (d, *J* = 7.1 Hz, 3H), 1.08 (d, *J* = 35.4 Hz, 15H). **<sup>13</sup>C NMR** (126 MHz, CDCl<sub>3</sub>) δ 193.13, 166.37, 155.24, 155.17, 149.97, 135.62, 134.16, 129.51, 129.45, 126.77, 124.79, 111.84, 86.54, 83.40, 63.18, 61.63, 32.32, 27.36, 17.06, 14.69, 14.44, 14.12. **HRMS** (ESI, *m/z*): calcd. for C<sub>24</sub>H<sub>32</sub>ClN<sub>3</sub>O<sub>7</sub> [M+Na]<sup>+</sup> 532.1821, found 532.1828.

**Specific Rotation:** [α]<sup>25</sup><sub>D</sub> = -111.9 (*c* = 1.0, CHCl<sub>3</sub>). 97% ee (HPLC condition: Chiralcel OD column, *n*-Hexane/*i*-PrOH = 90:10, flow rate = 1.0 mL/min, wavelength = 254 nm, *t*<sub>R</sub> = 6.842 min for major isomer, *t*<sub>R</sub> = 8.125 min for minor isomer).

**diethyl (R)-1-(1-(tert-butoxycarbonyl)-2-isopropyl-3-oxo-5-(o-tolyl)-2,3-dihydro-1H-pyrrol-2-yl)hydrazine-1,2-dicarboxylate (3i)**

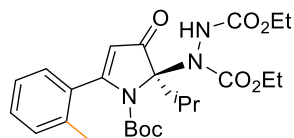

White solid, m.p. 101-103 °C. 65% yield.

**<sup>1</sup>H NMR** (500 MHz, CDCl<sub>3</sub>) δ 7.44 (s, 1H), 7.26 (d, *J* = 8.0 Hz, 1H), 7.18 (t, *J* = 7.8 Hz, 2H), 7.10 (d, *J* = 7.5 Hz, 1H), 5.46 (s, 1H), 4.22 (ddt, *J* = 38.6, 14.0, 7.5 Hz, 4H), 3.03 (s, 1H), 2.29 (s, 3H), 1.79 (s, 1H), 1.35 – 1.28 (m, 3H), 1.23 (t, *J* = 7.1 Hz, 3H), 1.16 – 1.01 (m, 15H). **<sup>13</sup>C NMR** (126 MHz, CDCl<sub>3</sub>) δ 193.09, 168.26, 155.02, 149.95, 134.34, 129.95, 128.87, 126.91, 125.20, 111.17, 85.08, 82.86, 63.09, 61.49, 31.32, 27.26, 16.83, 14.47, 14.40, 14.19, 14.11. **HRMS** (ESI, *m/z*): calcd. for C<sub>25</sub>H<sub>35</sub>N<sub>3</sub>O<sub>7</sub> [M+Na]<sup>+</sup> 512.2367, found 512.2371.

**Specific Rotation:** [α]<sup>25</sup><sub>D</sub> = -70.3 (*c* = 1.0, CHCl<sub>3</sub>). 88% ee (HPLC condition: Chiralcel OD column, *n*-Hexane/*i*-PrOH = 90:10, flow rate = 1.0 mL/min, wavelength = 254 nm, *t*<sub>R</sub> = 5.878 min for major isomer, *t*<sub>R</sub> = 6.818 min for minor isomer).

**diethyl (*R*)-1-(1-(tert-butoxycarbonyl)-2-methyl-3-oxo-5-phenyl-2,3-dihydro-1H-pyrrol-2-yl)hydrazine-1,2-dicarboxylate (3j)**

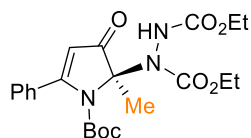

White solid, m.p. 93-95 °C, 95% yield.

**<sup>1</sup>H NMR** (500 MHz, CDCl<sub>3</sub>) δ 7.40 (q, *J* = 5.9 Hz, 3H), 7.35 (d, *J* = 5.8 Hz, 2H), 5.58 (s, 1H), 4.27 (tt, *J* = 15.2, 7.8 Hz, 2H), 4.21 – 4.06 (m, 2H), 1.66 (s, 3H), 1.32 (td, *J* = 7.2, 2.9 Hz, 3H), 1.21 (t, *J* = 7.1 Hz, 3H), 1.10 (s, 9H). **<sup>13</sup>C NMR** (126 MHz, CDCl<sub>3</sub>) δ 194.76, 167.39, 154.19, 149.72, 133.64, 129.66, 127.96, 126.68, 108.58, 83.09, 81.99, 62.92, 61.75, 27.32, 20.49, 14.37, 14.14. **HRMS** (ESI, *m/z*): calcd. for C<sub>22</sub>H<sub>29</sub>N<sub>3</sub>O<sub>7</sub> [M+Na]<sup>+</sup> 470.1898, found 470.1902.

**Specific Rotation:** [α]<sub>D</sub><sup>25</sup> = -60.2 (*c* = 1.0, CHCl<sub>3</sub>). 91% ee (HPLC condition: Chiralcel OD column, *n*-Hexane/*i*-PrOH = 80:20, flow rate = 1.0 mL/min, wavelength = 254 nm, *t*<sub>R</sub> = 4.880 min for major isomer, *t*<sub>R</sub> = 5.837 min for minor isomer).

**diisopropyl (*R*)-1-(1-(tert-butoxycarbonyl)-2-methyl-3-oxo-5-phenyl-2,3-dihydro-1H-pyrrol-2-yl)hydrazine-1,2-dicarboxylate (3k)**

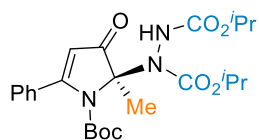

White solid, m.p. 82-84 °C, 95% yield.

**<sup>1</sup>H NMR** (500 MHz, CDCl<sub>3</sub>) δ 7.40 (q, *J* = 5.9 Hz, 3H), 7.38 – 7.33 (m, 2H), 5.57 (s, 1H), 5.03 (h, *J* = 6.2 Hz, 1H), 4.90 (h, *J* = 6.2 Hz, 1H), 1.66 (s, 3H), 1.36 – 1.28 (m, 6H), 1.21 (dd, *J* = 6.4, 2.7 Hz, 6H), 1.10 (s, 9H). **<sup>13</sup>C NMR** (126 MHz, CDCl<sub>3</sub>) δ 194.86, 167.12, 153.65, 149.62, 133.70, 129.63, 127.95, 126.66, 108.63, 82.90, 82.04, 71.02, 69.36, 27.32, 21.84, 21.81, 21.72, 21.67, 20.67. **HRMS** (ESI, *m/z*): calcd. for C<sub>24</sub>H<sub>33</sub>N<sub>3</sub>O<sub>7</sub> [M+Na]<sup>+</sup> 498.2211, found 498.2213.

**Specific Rotation:** [α]<sub>D</sub><sup>25</sup> = -52.8 (*c* = 1.0, CHCl<sub>3</sub>). 80% ee (HPLC condition: Chiralcel AD column, *n*-Hexane/*i*-PrOH = 90:10, flow rate = 1.0 mL/min, wavelength = 254 nm, *t*<sub>R</sub> = 7.995 min for minor isomer, *t*<sub>R</sub> = 10.362 min for major isomer).

**diethyl (*R*)-1-(2-benzyl-1-(tert-butoxycarbonyl)-3-oxo-5-phenyl-2,3-dihydro-1H-pyrrol-2-yl)hydrazine-1,2-dicarboxylate (3l)**

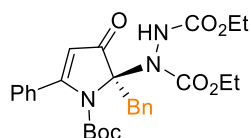

White solid, m.p. 83-85 °C, 95% yield.

**<sup>1</sup>H NMR** (500 MHz, CDCl<sub>3</sub>) δ 7.28 – 7.26 (m, 1H), 7.24 – 7.17 (m, 7H), 6.85 (d, *J* = 7.1 Hz, 2H), 5.19 (s, 1H), 4.38 – 4.23 (m, 2H), 4.17 (dq, *J* = 10.7, 7.2, 3.6 Hz, 2H), 3.85 (d, *J* = 12.7 Hz, 1H), 3.17 (s, 1H), 1.40 – 1.29 (m, 3H), 1.23 (t, *J* = 7.1 Hz, 3H), 1.11 (s, 9H). **<sup>13</sup>C NMR** (126 MHz, CDCl<sub>3</sub>) δ 194.73, 168.56, 154.25, 149.99, 133.49, 132.75, 130.85, 129.07, 127.91, 127.53, 127.40, 126.77, 111.38, 83.67, 83.00, 63.01, 61.91, 39.59, 27.40, 14.45, 14.21. **HRMS** (ESI, *m/z*): calcd. for C<sub>28</sub>H<sub>33</sub>N<sub>3</sub>O<sub>7</sub> [M+H]<sup>+</sup> 524.2392, found 524.2388.

**Specific Rotation:** [α]<sub>D</sub><sup>25</sup> = -63.0 (*c* = 1.0, CHCl<sub>3</sub>). 85% ee (HPLC condition: Chiralcel OD column, *n*-Hexane/*i*-PrOH = 80:20, flow rate = 1.0 mL/min, wavelength = 254 nm, *t*<sub>R</sub> = 4.875 min for major isomer, *t*<sub>R</sub> = 7.067 min for minor isomer).

**diisopropyl (R)-1-(1-(tert-butoxycarbonyl)-3-oxo-2,5-diphenyl-2,3-dihydro-1H-pyrrol-2-yl)hydrazine-1,2-dicarboxylate (3m)**

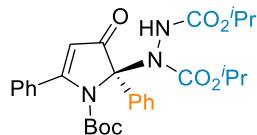

White solid, m.p. 101-103 °C, 92% yield.

**<sup>1</sup>H NMR** (500 MHz, CDCl<sub>3</sub>) δ 7.84 (d, *J* = 7.6 Hz, 2H), 7.45 (dt, *J* = 22.3, 3.7 Hz, 5H), 7.33 (p, *J* = 7.1, 6.7 Hz, 3H), 7.03 (s, 1H), 5.57 (s, 1H), 4.90 (dp, *J* = 51.0, 6.2 Hz, 2H), 1.41 (d, *J* = 6.3 Hz, 1H), 1.34 (d, *J* = 6.3 Hz, 1H), 1.25 (dd, *J* = 11.6, 5.8 Hz, 6H), 1.17 (d, *J* = 6.4 Hz, 2H), 1.12 (s, 9H), 1.02 (d, *J* = 6.3 Hz, 2H). **<sup>13</sup>C NMR** (126 MHz, CDCl<sub>3</sub>) δ 192.61, 167.60, 154.37, 150.62, 133.90, 133.00, 129.89, 129.01, 128.14, 128.09, 127.30, 127.13, 126.56, 109.69, 87.41, 83.20, 69.37, 68.72, 27.30, 21.76, 21.70. **HRMS** (ESI, *m/z*): calcd. for C<sub>29</sub>H<sub>35</sub>N<sub>3</sub>O<sub>7</sub> [M]<sup>+</sup> 537.2475, found 537.2479.

**Specific Rotation:** [α]<sub>D</sub><sup>25</sup> = -71.5 (*c* = 1.0, CHCl<sub>3</sub>). 40% ee (HPLC condition: Chiralcel OD column, *n*-Hexane/*i*-PrOH = 80:20, flow rate = 1.0 mL/min, wavelength = 254 nm, *t*<sub>R</sub> = 17.608 min for major isomer, *t*<sub>R</sub> = 23.788 min for minor isomer).

**diethyl (R) 1-(1-(tert-butoxycarbonyl)-5-(4-ethylphenyl)-2-isopropyl-3-oxo-2,3-dihydro-1H-pyrrol-2-yl)hydrazine-1,2-dicarboxylate (S3o)**

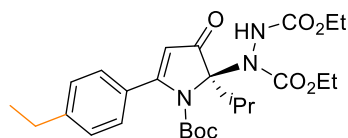

Yellow liquid, 89% yield.

**<sup>1</sup>H NMR** (500 MHz, CDCl<sub>3</sub>) δ 7.36 (s, 1H), 7.27 (d, *J* = 8.0 Hz, 2H), 7.22 (d, *J* = 8.0 Hz, 2H), 5.59 (s, 1H), 4.32 – 4.06 (m, 4H), 2.97 (p, *J* = 6.7 Hz, 1H), 2.69 (q, *J* = 7.6 Hz, 2H), 1.95 (s, 1H), 1.31 (t, *J* = 7.1 Hz, 3H), 1.23 (dt, *J* = 16.4, 7.4 Hz, 6H), 1.14 – 1.02 (m, 15H). **<sup>13</sup>C NMR** (126 MHz, CDCl<sub>3</sub>) δ 193.43, 168.58, 155.21, 150.40, 146.45, 131.24, 127.47, 126.64, 111.08, 86.67, 82.92, 63.09, 61.55, 32.51, 28.69, 27.29, 17.11, 15.39, 14.78, 14.44, 14.11. **HRMS** (ESI, *m/z*): calcd. for C<sub>26</sub>H<sub>37</sub>N<sub>3</sub>O<sub>7</sub> [M+Na]<sup>+</sup> 526.2524, found 526.2522.

**Specific Rotation:** [α]<sub>D</sub><sup>25</sup> = -39.1 (*c* = 1.0, CHCl<sub>3</sub>). 96% ee (HPLC condition: Chiralcel OD column, *n*-Hexane/*i*-PrOH = 90:10, flow rate = 1.0 mL/min, wavelength = 254 nm, *t*<sub>R</sub> = 6.093 min for major isomer, *t*<sub>R</sub> = 8.385 min for minor isomer).

**diethyl (R) 1-(1-(tert-butoxycarbonyl)-5-(4-butylphenyl)-2-isopropyl-3-oxo-2,3-dihydro-1H-pyrrol-2-yl)hydrazine-1,2-dicarboxylate (S3p)**

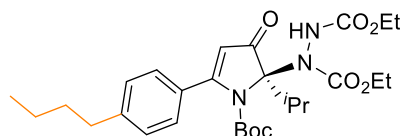

Yellow liquid, 95% yield.

**<sup>1</sup>H NMR** (500 MHz, CDCl<sub>3</sub>) δ 7.36 (s, 1H), 7.26 (d, *J* = 8.1 Hz, 2H), 7.20 (d, *J* = 8.1 Hz, 2H), 5.58 (s, 1H), 4.16 (ddtt, *J* = 24.8, 14.1, 10.6, 7.3 Hz, 4H), 2.97 (p, *J* = 6.8 Hz, 1H), 2.65 (t, *J* = 7.7 Hz, 2H), 2.02 (s, 1H), 1.61 (p, *J* = 7.5 Hz, 2H), 1.38 (dt, *J* = 14.8, 7.4 Hz, 2H), 1.31 (q, *J* = 7.0 Hz, 3H), 1.21 (t, *J* = 7.1 Hz, 3H), 1.19 – 0.98 (m, 15H), 0.93 (t, *J* = 7.4 Hz, 3H). **<sup>13</sup>C NMR** (126 MHz, CDCl<sub>3</sub>) δ 193.43, 168.60, 155.21, 150.41, 145.08, 131.19, 128.03, 126.55, 111.08, 86.68, 82.93, 63.09, 61.55, 35.38, 33.40, 32.52, 27.30, 22.08, 17.11, 14.77, 14.44, 14.10, 13.63. **HRMS** (ESI, *m/z*): calcd. for C<sub>28</sub>H<sub>41</sub>N<sub>3</sub>O<sub>7</sub> [M+Na]<sup>+</sup> 554.2837, found 554.2832.

**Specific Rotation:** [α]<sub>D</sub><sup>25</sup> = -35.1 (*c* = 1.0, CHCl<sub>3</sub>). 97% ee (HPLC condition: Chiralcel OD column, *n*-Hexane/*i*-PrOH = 90:10, flow rate = 1.0 mL/min, wavelength = 254 nm, *t*<sub>R</sub> = 5.615

min for major isomer,  $t_R = 7.620$  min for minor isomer).

**diethyl (R) 1-(1-(tert-butoxycarbonyl)-5-(4-(tert-butyl)phenyl)-2-isopropyl-3-oxo-2,3-dihydro-1H-pyrrol-2-yl)hydrazine-1,2-dicarboxylate (S3q)**

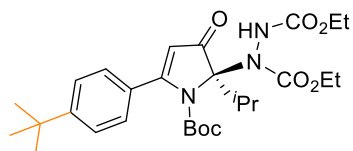

Yellow liquid, 97% yield.

$^1\text{H NMR}$  (500 MHz,  $\text{CDCl}_3$ )  $\delta$  7.42 (d,  $J = 8.2$  Hz, 2H), 7.36 (s, 1H), 7.29 (d,  $J = 8.2$  Hz, 2H), 5.59 (s, 1H), 4.32 – 4.05 (m, 4H), 2.97 (p,  $J = 6.8$  Hz, 1H), 2.08 (s, 1H), 1.33 (s, 12H), 1.21 (t,  $J = 7.1$  Hz, 3H), 1.13 – 1.01 (m, 15H).  $^{13}\text{C NMR}$  (126 MHz,  $\text{CDCl}_3$ )  $\delta$  193.44, 168.54, 155.21, 153.38, 150.36, 130.98, 126.39, 124.87, 111.02, 86.63, 82.87, 63.08, 61.53, 34.74, 32.49, 31.12, 27.24, 17.11, 14.75, 14.44, 14.11. **HRMS** (ESI,  $m/z$ ): calcd. for  $\text{C}_{28}\text{H}_{41}\text{N}_3\text{O}_7$   $[\text{M}+\text{Na}]^+$  554.2837, found 554.2830.

**Specific Rotation:**  $[\alpha]_D^{25} = -47.1$  ( $c = 1.0$ ,  $\text{CHCl}_3$ ). 97% ee (HPLC condition: Chiralcel OD column,  $n$ -Hexane/ $i$ -PrOH = 90:10, flow rate = 1.0 mL/min, wavelength = 254 nm,  $t_R = 5.837$  min for major isomer,  $t_R = 7.988$  min for minor isomer).

**diethyl (R) 1-(5-([1,1'-biphenyl]-4-yl)-1-(tert-butoxycarbonyl)-2-isopropyl-3-oxo-2,3-dihydro-1H-pyrrol-2-yl)hydrazine-1,2-dicarboxylate (S3r)**

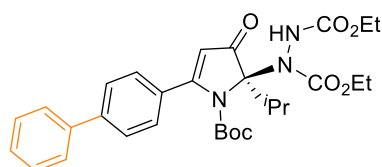

Yellow liquid, 96% yield.

$^1\text{H NMR}$  (500 MHz,  $\text{CDCl}_3$ )  $\delta$  7.60 (dd,  $J = 19.5, 7.6$  Hz, 4H), 7.50 – 7.40 (m, 4H), 7.36 (d,  $J = 7.4$  Hz, 1H), 5.66 (s, 1H), 4.31 – 4.09 (m, 4H), 3.00 (h,  $J = 6.8$  Hz, 1H), 1.86 (s, 1H), 1.31 (t,  $J = 6.8$  Hz, 3H), 1.22 (t,  $J = 7.1$  Hz, 3H), 1.09 (d,  $J = 19.5$  Hz, 15H).  $^{13}\text{C NMR}$  (126 MHz,  $\text{CDCl}_3$ )  $\delta$  193.39, 168.04, 155.23, 150.35, 142.91, 140.19, 132.78, 128.90, 127.87, 127.10, 127.01, 126.69, 111.44, 86.72, 83.20, 63.16, 61.61, 32.54, 27.37, 17.16, 14.81, 14.47, 14.16. **HRMS** (ESI,  $m/z$ ): calcd. for  $\text{C}_{30}\text{H}_{37}\text{N}_3\text{O}_7$   $[\text{M}+\text{Na}]^+$  574.2524, found 574.2524.

**Specific Rotation:**  $[\alpha]_D^{25} = -23.2$  ( $c = 1.0$ ,  $\text{CHCl}_3$ ). 96% ee (HPLC condition: Chiralcel OD

column, *n*-Hexane/*i*-PrOH = 90:10, flow rate = 1.0 mL/min, wavelength = 254 nm,  $t_R$  = 8.958 min for major isomer,  $t_R$  = 12.823 min for minor isomer).

**diethyl (R) 1-(1-(tert-butoxycarbonyl)-5-(4'-ethyl-[1,1'-biphenyl]-4-yl)-2-isopropyl-3-oxo-2,3-dihydro-1H-pyrrol-2-yl)hydrazine-1,2-dicarboxylate (S3s)**

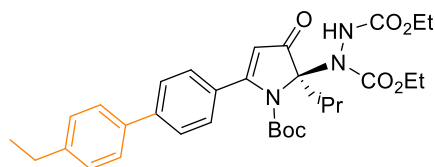

White solid, m.p. 124-126 °C, 92% yield.

$^1\text{H NMR}$  (500 MHz,  $\text{CDCl}_3$ )  $\delta$  7.61 (d,  $J$  = 6.0 Hz, 2H), 7.52 (d,  $J$  = 6.0 Hz, 2H), 7.42 (d,  $J$  = 6.0 Hz, 2H), 7.37 (s, 1H), 7.31 – 7.25 (m, 2H), 5.66 (s, 1H), 4.33 – 4.07 (m, 4H), 2.99 (hept,  $J$  = 6.4 Hz, 1H), 2.70 (qd,  $J$  = 7.5, 2.2 Hz, 2H), 1.91 (s, 1H), 1.29 (dd,  $J$  = 13.5, 6.1 Hz, 6H), 1.22 (dt,  $J$  = 9.2, 4.6 Hz, 3H), 1.18 – 1.04 (m, 15H).  $^{13}\text{C NMR}$  (126 MHz,  $\text{CDCl}_3$ )  $\delta$  193.71, 168.19, 155.23, 150.38, 144.22, 142.88, 137.52, 132.45, 128.43, 127.07, 126.93, 126.49, 111.34, 86.74, 83.19, 63.16, 61.61, 32.56, 28.46, 27.37, 17.16, 15.29, 14.82, 14.47, 14.15. **HRMS** (ESI,  $m/z$ ): calcd. for  $\text{C}_{32}\text{H}_{41}\text{N}_3\text{O}_7$   $[\text{M}+\text{Na}]^+$  602.2837, found 602.2833.

**Specific Rotation:**  $[\alpha]_D^{25} = -33.3$  ( $c$  = 1.0,  $\text{CHCl}_3$ ). 97% ee (HPLC condition: Chiralcel OD column, *n*-Hexane/*i*-PrOH = 90:10, flow rate = 1.0 mL/min, wavelength = 254 nm,  $t_R$  = 7.387 min for major isomer,  $t_R$  = 9.898 min for minor isomer).

**diethyl (R) 1-(1-(tert-butoxycarbonyl)-5-(4-ethoxyphenyl)-2-isopropyl-3-oxo-2,3-dihydro-1H-pyrrol-2-yl)hydrazine-1,2-dicarboxylate (S3t)**

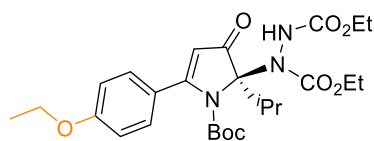

Yellow liquid, 87% yield.

$^1\text{H NMR}$  (500 MHz,  $\text{CDCl}_3$ )  $\delta$  7.34 (s, 1H), 7.29 (d,  $J$  = 8.6 Hz, 2H), 6.90 (d,  $J$  = 8.6 Hz, 2H), 5.57 (s, 1H), 4.37 – 4.03 (m, 6H), 2.96 (h,  $J$  = 6.7 Hz, 1H), 1.87 (s, 1H), 1.42 (t,  $J$  = 7.0 Hz, 3H), 1.30 (t,  $J$  = 7.4 Hz, 3H), 1.20 (t,  $J$  = 7.1 Hz, 3H), 1.13 (s, 9H), 1.10 (d,  $J$  = 6.6 Hz, 3H), 1.03 (d,  $J$  = 7.0 Hz, 3H).  $^{13}\text{C NMR}$  (126 MHz,  $\text{CDCl}_3$ )  $\delta$  193.31, 168.33, 160.52, 155.22, 150.55, 128.14, 125.95, 114.19, 110.72, 86.88, 82.93, 63.76, 63.08, 61.56, 32.62, 27.42, 17.13, 14.85,



14.54, 14.44, 14.10. **HRMS** (ESI,  $m/z$ ): calcd. for  $C_{26}H_{37}N_3O_8$   $[M+Na]^+$  542.2473, found 542.247.

**Specific Rotation:**  $[\alpha]_D^{25} = -30.5$  ( $c = 1.0$ ,  $CHCl_3$ ). 96% ee (HPLC condition: Chiralcel OD column,  $n$ -Hexane/ $i$ -PrOH = 90:10, flow rate = 1.0 mL/min, wavelength = 254 nm,  $t_R = 8.558$  min for major isomer,  $t_R = 10.087$  min for minor isomer).

**diethyl (R) 1-(1-(tert-butoxycarbonyl)-2-isopropyl-3-oxo-5-(4-(trifluoromethyl)phenyl)-2,3-dihydro-1H-pyrrol-2-yl)hydrazine-1,2-dicarboxylate (S3u)**

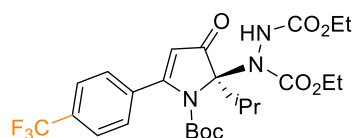

White solid, m.p. 47-49 °C, 70% yield.

**$^1H$  NMR** (500 MHz,  $CDCl_3$ )  $\delta$  7.67 (d,  $J = 8.2$  Hz, 2H), 7.48 (d,  $J = 8.2$  Hz, 2H), 7.31 (s, 1H), 5.64 (s, 1H), 4.28 – 4.06 (m, 4H), 2.99 (hept,  $J = 6.7$  Hz, 1H), 1.85 (s, 1H), 1.31 (q,  $J = 7.1$ , 6.0 Hz, 3H), 1.22 (t,  $J = 7.1$  Hz, 3H), 1.12 – 1.04 (m, 15H).  **$^{13}C$  NMR** (126 MHz,  $CDCl_3$ )  $\delta$  193.05, 166.25, 155.16, 149.86, 131.76 (q,  $J = 34.02$  Hz), 127.03, 125.02 (q,  $J = 16.83$  Hz), 123.71 (q,  $J = 273.42$  Hz), 122.62, 112.22, 86.52, 83.58, 63.21, 61.66, 32.30, 27.27, 17.03, 14.67, 14.42, 14.12.  **$^{19}F$  NMR** (471 MHz,  $CDCl_3$ )  $\delta$  -63.06. **HRMS** (ESI,  $m/z$ ): calcd. for  $C_{25}H_{32}F_3N_3O_7$   $[M+H]^+$  544.2192, found 544.2199.

**Specific Rotation:**  $[\alpha]_D^{25} = -38.0$  ( $c = 1.0$ ,  $CHCl_3$ ). 97% ee (HPLC condition: Chiralcel OD column,  $n$ -Hexane/ $i$ -PrOH = 90:10, flow rate = 1.0 mL/min, wavelength = 254 nm,  $t_R = 6.103$  min for major isomer,  $t_R = 7.122$  min for minor isomer).

**diethyl (R) 1-(1-(tert-butoxycarbonyl)-5-(3-fluorophenyl)-2-isopropyl-3-oxo-2,3-dihydro-1H-pyrrol-2-yl)hydrazine-1,2-dicarboxylate (S3v)**

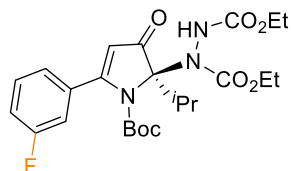

Yellow liquid, 93% yield.

**$^1H$  NMR** (500 MHz,  $CDCl_3$ )  $\delta$  7.41 – 7.35 (m, 1H), 7.21 (s, 1H), 7.19 – 7.09 (m, 2H), 7.06 (d,  $J = 9.0$  Hz, 1H), 5.61 (s, 1H), 4.32 – 3.96 (m, 4H), 2.97 (p,  $J = 6.9$  Hz, 1H), 2.02 (s, 1H), 1.31

(t,  $J = 7.2$  Hz, 3H), 1.24 – 1.19 (m, 3H), 1.08 (d,  $J = 32.4$  Hz, 15H).  $^{13}\text{C}$  NMR (126 MHz,  $\text{CDCl}_3$ )  $\delta$  193.18, 166.79, 162.38 (d,  $J = 248.22$  Hz), 155.16, 150.00, 135.90, 129.81 (d,  $J = 8.82$  Hz), 122.39 (d,  $J = 3.78$  Hz), 116.38 (d,  $J = 21.42$  Hz), 113.83 (d,  $J = 23.94$  Hz), 111.80, 86.56, 83.37, 63.16, 61.60, 32.35, 27.33, 17.01, 14.69, 14.42, 14.09.  $^{19}\text{F}$  NMR (471 MHz,  $\text{CDCl}_3$ )  $\delta$  -112.91. HRMS (ESI,  $m/z$ ): calcd. for  $\text{C}_{24}\text{H}_{32}\text{FN}_3\text{O}_7$   $[\text{M}+\text{Na}]^+$  516.2116, found 516.2116.

**Specific Rotation:**  $[\alpha]_{\text{D}}^{25} = -40.1$  ( $c = 1.0$ ,  $\text{CHCl}_3$ ). 97% ee (HPLC condition: Chiralcel OD column,  $n$ -Hexane/ $i$ -PrOH = 90:10, flow rate = 1.0 mL/min, wavelength = 254 nm,  $t_{\text{R}} = 6.587$  min for major isomer,  $t_{\text{R}} = 8.523$  min for minor isomer).

**diethyl (R) 1-(5-(3-bromophenyl)-1-(tert-butoxycarbonyl)-2-isopropyl-3-oxo-2,3-dihydro-1H-pyrrol-2-yl)hydrazine-1,2-dicarboxylate (S3w)**

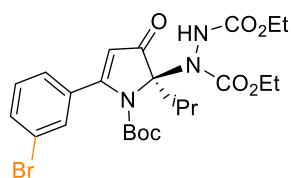

White solid, m.p. 62-64 °C, 53% yield.

$^1\text{H}$  NMR (500 MHz,  $\text{CDCl}_3$ )  $\delta$  7.40 – 7.34 (m, 4H), 5.60 (s, 1H), 4.29 – 4.07 (m, 4H), 2.98 (p,  $J = 7.1$  Hz, 1H), 1.70 (s, 1H), 1.32 (dd,  $J = 7.0, 3.5$  Hz, 3H), 1.21 (t,  $J = 7.1$  Hz, 3H), 1.13 – 1.03 (m, 15H).  $^{13}\text{C}$  NMR (126 MHz,  $\text{CDCl}_3$ )  $\delta$  193.37, 168.29, 155.18, 150.29, 134.00, 129.59, 128.02, 126.56, 111.44, 86.56, 83.03, 63.11, 61.56, 32.43, 27.29, 17.09, 14.75, 14.44, 14.12.

HRMS (ESI,  $m/z$ ): calcd. for  $\text{C}_{24}\text{H}_{32}\text{BrN}_3\text{O}_7$   $[\text{M}+\text{Na}]^+$  576.1316, found 576.132.

**Specific Rotation:**  $[\alpha]_{\text{D}}^{25} = -26.5$  ( $c = 1.0$ ,  $\text{CHCl}_3$ ). 98% ee (HPLC condition: Chiralcel OD column,  $n$ -Hexane/ $i$ -PrOH = 90:10, flow rate = 1.0 mL/min, wavelength = 254 nm,  $t_{\text{R}} = 6.903$  min for major isomer,  $t_{\text{R}} = 9.100$  min for minor isomer).

**diethyl (R) 1-(5-(3,5-bis(trifluoromethyl)phenyl)-1-(tert-butoxycarbonyl)-2-isopropyl-3-oxo-2,3-dihydro-1H-pyrrol-2-yl)hydrazine-1,2-dicarboxylate (S3x)**

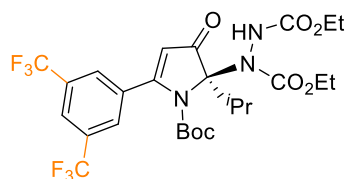

Yellow liquid, 92% yield.

**<sup>1</sup>H NMR** (500 MHz, CDCl<sub>3</sub>) δ 7.94 (s, 1H), 7.79 (s, 2H), 5.71 (s, 1H), 4.40 – 4.09 (m, 4H), 3.00 (p, *J* = 6.8 Hz, 1H), 1.81 (s, 1H), 1.35 – 1.30 (m, 3H), 1.23 (t, *J* = 7.1 Hz, 3H), 1.18 – 1.05 (m, 15H). **<sup>13</sup>C NMR** (126 MHz, CDCl<sub>3</sub>) δ 192.60, 164.31, 155.10, 149.49, 132.04 (q, *J* = 34.02 Hz), 126.76, 122.88 (q, *J* = 3.78 Hz), 122.87 (q, *J* = 273.42 Hz), 112.96, 86.64, 83.98, 63.31, 61.73, 32.21, 27.20, 17.04, 14.62, 14.40, 14.08. **<sup>19</sup>F NMR** (471 MHz, CDCl<sub>3</sub>) δ -63.15. **HRMS** (ESI, *m/z*): calcd. for C<sub>26</sub>H<sub>31</sub>F<sub>6</sub>N<sub>3</sub>O<sub>7</sub> [M+Na]<sup>+</sup> 634.1958, found 634.1957.

**Specific Rotation:** [α]<sub>D</sub><sup>25</sup> = -103.1 (*c* = 1.0, CHCl<sub>3</sub>). 95% ee (HPLC condition: Chiralcel IB-3 column, *n*-Hexane/*i*-PrOH = 97:3, flow rate = 1.0 mL/min, wavelength = 254 nm, *t*<sub>R</sub> = 7.627 min for major isomer, *t*<sub>R</sub> = 9.477 min for minor isomer).

**diethyl (R) 1-(1-(tert-butoxycarbonyl)-2-isopropyl-5-(naphthalen-1-yl)-3-oxo-2,3-dihydro-1H-pyrrol-2-yl)hydrazine-1,2-dicarboxylate (S3y)**

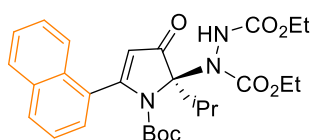

Yellow liquid, 84% yield.

**<sup>1</sup>H NMR** (500 MHz, CDCl<sub>3</sub>) δ 7.97 (d, *J* = 8.2 Hz, 1H), 7.85 (dd, *J* = 14.2, 8.0 Hz, 2H), 7.47 (dt, *J* = 15.7, 7.3 Hz, 3H), 7.33 (d, *J* = 7.1 Hz, 1H), 5.64 (s, 1H), 4.40 – 4.19 (m, 4H), 3.06 (dt, *J* = 14.5, 7.5 Hz, 1H), 1.82 (s, 1H), 1.33 – 1.08 (m, 12H), 0.64 (s, 9H). **<sup>13</sup>C NMR** (126 MHz, CDCl<sub>3</sub>) δ 193.03, 167.28, 155.48, 155.08, 149.83, 133.21, 132.42, 131.12, 129.29, 127.94, 126.71, 126.28, 125.71, 124.69, 124.51, 112.04, 85.24, 82.72, 63.37, 61.57, 31.37, 26.84, 16.82, 14.51, 14.44, 14.20. **HRMS** (ESI, *m/z*): calcd. for C<sub>28</sub>H<sub>35</sub>N<sub>3</sub>O<sub>7</sub> [M+H]<sup>+</sup> 526.2548, found 526.2552.

**Specific Rotation:** [α]<sub>D</sub><sup>25</sup> = -60.7 (*c* = 1.0, CHCl<sub>3</sub>). 94% ee (HPLC condition: Chiralcel IA column, *n*-Hexane/*i*-PrOH = 90:10, flow rate = 1.0 mL/min, wavelength = 254 nm, *t*<sub>R</sub> = 7.070 min for major isomer, *t*<sub>R</sub> = 7.887 min for minor isomer).

**diisopropyl (R)-1-(1-(tert-butoxycarbonyl)-2-butyl-3-oxo-5-phenyl-2,3-dihydro-1H-pyrrol-2-yl)hydrazine-1,2-dicarboxylate (S3z)**

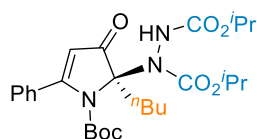

Yellow liquid, 92% yield.

**<sup>1</sup>H NMR** (500 MHz, CDCl<sub>3</sub>) δ 7.43 – 7.34 (m, 5H), 5.61 (s, 1H), 5.02 (p, *J* = 6.2 Hz, 1H), 4.89 (h, *J* = 6.2 Hz, 1H), 2.46 – 2.36 (m, 1H), 1.95 (s, 1H), 1.36 – 1.26 (m, 10H), 1.21 (dd, *J* = 6.2, 2.5 Hz, 7H), 1.10 (s, 9H), 0.86 (q, *J* = 6.5 Hz, 3H). **<sup>13</sup>C NMR** (126 MHz, CDCl<sub>3</sub>) δ 194.95, 168.21, 153.73, 149.75, 133.69, 129.56, 127.90, 126.49, 110.77, 84.07, 82.73, 77.00, 70.91, 69.22, 34.03, 27.23, 24.25, 22.54, 21.75, 21.72, 21.62, 21.59, 13.49. **HRMS** (ESI, *m/z*): calcd. for C<sub>27</sub>H<sub>39</sub>N<sub>3</sub>O<sub>7</sub> [M]<sup>+</sup> 517.2788, found 517.2780.

**Specific Rotation:** [α]<sup>25</sup><sub>D</sub> = -79.5 (*c* = 1.0, CHCl<sub>3</sub>). 71% ee (HPLC condition: Chiralcel IB column, *n*-Hexane/*i*-PrOH = 90:10, flow rate = 1.0 mL/min, wavelength = 254 nm, *t*<sub>R</sub> = 9.267 min for major isomer, *t*<sub>R</sub> = 13.410 min for minor isomer).

**diethyl (*R*)-1-(1-(tert-butoxycarbonyl)-2-(4-nitrobenzyl)-3-oxo-5-phenyl-2,3-dihydro-1H-pyrrol-2-yl)hydrazine-1,2-dicarboxylate (S3aa)**

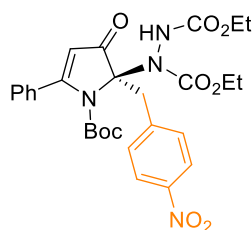

White solid, m.p. 94-96 °C, 90% yield.

**<sup>1</sup>H NMR** (500 MHz, CDCl<sub>3</sub>) δ 8.00 (d, *J* = 8.5 Hz, 2H), 7.31 (d, *J* = 8.3 Hz, 2H), 7.22 – 7.16 (m, 3H), 7.07 (s, 1H), 6.82 (d, *J* = 7.0 Hz, 2H), 5.15 (s, 1H), 4.23 (dt, *J* = 10.4, 6.1 Hz, 2H), 4.13 – 4.06 (m, 2H), 3.89 (d, *J* = 12.6 Hz, 1H), 3.18 (s, 1H), 1.39 – 1.06 (m, 6H), 1.04 (s, 9H). **<sup>13</sup>C NMR** (126 MHz, CDCl<sub>3</sub>) δ 193.10, 168.01, 153.16, 149.23, 146.78, 139.69, 132.01, 130.83, 128.77, 126.96, 125.63, 122.03, 110.21, 82.77, 82.49, 62.37, 61.22, 38.51, 26.49, 13.55, 13.30. **HRMS** (ESI, *m/z*): calcd. for C<sub>28</sub>H<sub>32</sub>N<sub>4</sub>O<sub>9</sub> [M+H]<sup>+</sup> 569.2242, found 569.2268.

**Specific Rotation:** [α]<sup>25</sup><sub>D</sub> = -48.5 (*c* = 1.0, CHCl<sub>3</sub>). 91% ee (HPLC condition: Chiralcel AD column, *n*-Hexane/*i*-PrOH = 90:10, flow rate = 1.0 mL/min, wavelength = 254 nm, *t*<sub>R</sub> = 24.872 min for minor isomer, *t*<sub>R</sub> = 26.570 min for major isomer).

**diisopropyl (*R*)-1-(1-(tert-butoxycarbonyl)-2-(4-nitrobenzyl)-3-oxo-5-phenyl-2,3-dihydro-1H-pyrrol-2-yl)hydrazine-1,2-dicarboxylate (S3ab)**

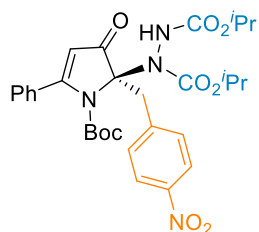

White solid, m.p. 97-99 °C, 80% yield.

**<sup>1</sup>H NMR** (500 MHz, CDCl<sub>3</sub>) δ 8.08 (dd, *J* = 8.8, 2.3 Hz, 2H), 7.40 (d, *J* = 6.8 Hz, 2H), 7.31 (d, *J* = 4.8 Hz, 1H), 7.27 (t, *J* = 7.5 Hz, 2H), 6.92 (d, *J* = 8.4 Hz, 2H), 5.23 (s, 1H), 5.07 (pd, *J* = 6.3, 2.4 Hz, 1H), 4.93 (dq, *J* = 8.8, 6.7, 3.5 Hz, 1H), 3.99 (d, *J* = 12.6 Hz, 1H), 3.26 (s, 1H), 1.36 (d, *J* = 13.8 Hz, 6H), 1.23 (dt, *J* = 6.3, 3.3 Hz, 6H), 1.13 (s, 9H). **<sup>13</sup>C NMR** (126 MHz, CDCl<sub>3</sub>) δ 194.15, 168.66, 153.52, 150.04, 147.62, 140.75, 132.91, 131.70, 129.65, 127.84, 126.49, 122.89, 111.11, 83.48, 83.37, 71.46, 69.82, 39.57, 27.35, 21.93, 21.84, 21.74, 21.69.

**HRMS** (ESI, *m/z*): calcd. for C<sub>30</sub>H<sub>36</sub>N<sub>4</sub>O<sub>9</sub> [M+Na]<sup>+</sup> 619.2374, found 619.2394.

**Specific Rotation:** [α]<sup>25</sup><sub>D</sub> = -30.9 (*c* = 1.0, CHCl<sub>3</sub>). 94% ee (HPLC condition: Chiralcel IA column, *n*-Hexane/*i*-PrOH = 90:10, flow rate = 1.0 mL/min, wavelength = 254 nm, *t*<sub>R</sub> = 15.263 min for minor isomer, *t*<sub>R</sub> = 16.523 min for major isomer).

**diethyl (R)-1-(1-((benzyloxy)carbonyl)-2-isopropyl-3-oxo-5-phenyl-2,3-dihydro-1H-pyrrol-2-yl)hydrazine-1,2-dicarboxylate (S3ac)**

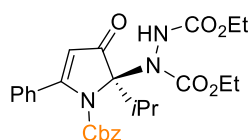

White solid, m.p. 92-94 °C, 93% yield.

**<sup>1</sup>H NMR** (500 MHz, CDCl<sub>3</sub>) δ 7.37 – 7.27 (m, 5H), 7.24 – 7.17 (m, 3H), 6.86 (d, *J* = 7.3 Hz, 2H), 5.63 (s, 1H), 4.92 (s, 2H), 4.24 (tt, *J* = 16.0, 8.6 Hz, 2H), 4.16 – 3.98 (m, 2H), 2.99 (hept, *J* = 6.8 Hz, 1H), 1.30 (d, *J* = 10.6 Hz, 3H), 1.17 – 1.08 (m, 6H), 1.03 (d, *J* = 7.0 Hz, 3H). **<sup>13</sup>C NMR** (126 MHz, CDCl<sub>3</sub>) δ 192.95, 167.72, 154.96, 151.11, 134.32, 133.06, 129.81, 128.37, 128.12, 128.05, 126.64, 112.25, 86.89, 68.28, 63.19, 61.63, 32.39, 17.18, 14.82, 14.44, 14.04.

**HRMS** (ESI, *m/z*): calcd. for C<sub>27</sub>H<sub>31</sub>N<sub>3</sub>O<sub>7</sub> [M+Na]<sup>+</sup> 532.2054, found 532.2062.

**Specific Rotation:** [α]<sup>25</sup><sub>D</sub> = -127.2 (*c* = 1.0, CHCl<sub>3</sub>). 97% ee (HPLC condition: Chiralcel IB-3 column, *n*-Hexane/*i*-PrOH = 80:20, flow rate = 1.0 mL/min, wavelength = 254 nm, *t*<sub>R</sub> = 7.165 min for major isomer, *t*<sub>R</sub> = 7.907 min for minor isomer).

**Diisopropyl (R, R) -1-(1-(tert-butoxycarbonyl)-2-methyl-3-oxo-5-phenyl-2,3-dihydro-1H-pyrrol-2-yl)-2-(2-(ethoxycarbonyl)allyl)hydrazine-1,2-dicarboxylate (5)**

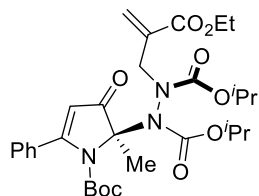

Yellow liquid, 80% yield, 1:1 dr.

**<sup>1</sup>H NMR** (500 MHz, CDCl<sub>3</sub>) δ 7.46 – 7.32 (m, 10H), 6.40 (s, 1H), 6.34 (s, 1H), 6.01 (s, 1H), 5.80 (s, 1H), 5.57 (s, 1H), 5.51 (s, 1H), 5.01 (p, *J* = 6.2 Hz, 1H), 4.92 (dp, *J* = 12.9, 6.4 Hz, 2H), 4.84 (q, *J* = 6.2 Hz, 1H), 4.76 (s, 1H), 4.56 (d, *J* = 17.6 Hz, 1H), 4.43 (d, *J* = 16.8 Hz, 1H), 4.32 (d, *J* = 16.9 Hz, 1H), 4.23 (dq, *J* = 14.2, 7.1, 1.8 Hz, 4H), 1.77 (s, 3H), 1.71 (s, 3H), 1.43 – 1.27 (m, 18H), 1.20 (p, *J* = 9.0, 6.6 Hz, 12H), 1.11 (s, 9H), 1.05 (s, 9H). **<sup>13</sup>C NMR** (126 MHz, CDCl<sub>3</sub>) δ 195.69, 170.06, 167.51, 166.35, 166.03, 156.35, 153.89, 153.13, 149.21, 149.01, 137.38, 135.87, 134.65, 134.31, 129.50, 127.87, 127.58, 126.65, 124.72, 108.60, 108.27, 82.32, 81.56, 70.28, 60.52, 60.20, 54.42, 53.55, 27.42, 27.25, 21.90, 21.86, 21.83, 21.76, 21.70, 21.54, 14.09, 14.05. **HRMS** (ESI, *m/z*): calcd. for C<sub>30</sub>H<sub>41</sub>N<sub>3</sub>O<sub>9</sub> [M+Na]<sup>+</sup> 610.2735, found 610.2730.

**Specific Rotation:** [ $\alpha$ ]<sub>D</sub><sup>25</sup> = -123.5 (*c* = 1.0, CHCl<sub>3</sub>). 80% , 80% ee (HPLC condition: Chiralcel AD column, *n*-Hexane/*i*-PrOH = 90:10, flow rate = 1.0 mL/min, wavelength = 254 nm, *t*<sub>R</sub> = 5.425 min for major isomer, *t*<sub>R</sub> = 8.065 min for minor isomer, *t*<sub>R</sub> = 6.025 min for minor isomer, *t*<sub>R</sub> = 6.810 min for major isomer).

**diisopropyl (R, R)-1-(1-(tert-butoxycarbonyl)-2-isopropyl-3-oxo-5-phenyl-2,3-dihydro-1H-pyrrol-2-yl)-2-(2-(ethoxycarbonyl)allyl)hydrazine-1,2-dicarboxylate (6a)**

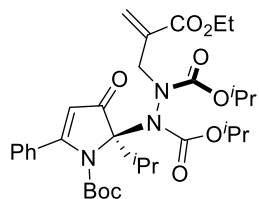

Yellow liquid, 73% yield.

**<sup>1</sup>H NMR** (500 MHz, CDCl<sub>3</sub>) δ 7.35 – 7.24 (m, 5H), 6.22 (s, 1H), 5.60 (s, 1H), 5.38 (s, 1H), 4.87 (dp, *J* = 23.2, 6.5 Hz, 2H), 4.67 – 4.44 (m, 1H), 4.23 – 4.07 (m, 3H), 3.35 – 2.80 (m, 1H), 1.18 (ddd, *J* = 20.3, 14.1, 6.7 Hz, 15H), 1.08 – 0.93 (m, 15H). **<sup>13</sup>C NMR** (126 MHz, CDCl<sub>3</sub>) δ 194.21, 166.21, 153.40, 148.89, 137.49, 134.41, 129.33, 127.90, 126.58, 110.16, 82.27, 70.74,

60.24, 55.57, 31.41, 27.33, 21.90, 21.69, 17.68, 16.05, 14.08. **HRMS** (ESI,  $m/z$ ): calcd. for  $C_{32}H_{45}N_3O_9$   $[M+Na]^+$  638.3048, found 638.3052.

**Specific Rotation:**  $[\alpha]^{25}_D = -85.9$  ( $c = 1.0$ ,  $CHCl_3$ ). 97% ee (HPLC condition: Chiralcel IA column,  $n$ -Hexane/ $i$ -PrOH = 90:10, flow rate = 1.0 mL/min, wavelength = 254 nm,  $t_R = 5.058$  min for major isomer,  $t_R = 7.042$  min for minor isomer).

**diisopropyl (*R, R*)-1-(1-(tert-butoxycarbonyl)-2-isopropyl-3-oxo-5-(*m*-tolyl)-2,3-dihydro-1H-pyrrol-2-yl)-2-(2-(ethoxycarbonyl)allyl)hydrazine-1,2-dicarboxylate (6b)**

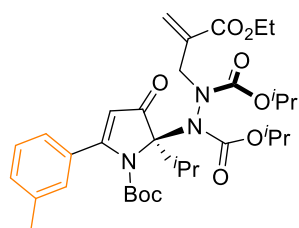

Yellow liquid, 66% yield.

**$^1H$  NMR** (500 MHz,  $CDCl_3$ )  $\delta$  7.14 (dd,  $J = 25.0, 7.7$  Hz, 2H), 7.09 – 7.01 (m, 2H), 6.22 (s, 1H), 5.60 (s, 1H), 5.37 (s, 1H), 4.87 (ddt,  $J = 16.6, 10.4, 6.2$  Hz, 2H), 4.53 (d,  $J = 20.2$  Hz, 1H), 4.23 – 4.05 (m, 3H), 3.15-3.06 (m, 1H), 2.28 (s, 3H), 1.19 (dt,  $J = 24.4, 7.3$  Hz, 15H), 1.09 – 0.91 (m, 15H).  **$^{13}C$  NMR** (126 MHz,  $CDCl_3$ )  $\delta$  194.25, 166.22, 148.96, 137.50, 134.26, 130.06, 127.88, 127.15, 123.76, 109.93, 82.12, 70.87, 60.24, 55.60, 31.78, 27.34, 21.89, 21.69, 21.09, 17.68, 16.04, 14.09. **HRMS** (ESI,  $m/z$ ): calcd. for  $C_{33}H_{47}N_3O_9$   $[M+H]^+$  630.3385, found 630.3392.

**Specific Rotation:**  $[\alpha]^{25}_D = -79.6$  ( $c = 1.0$ ,  $CHCl_3$ ). 96% ee (HPLC condition: Chiralcel OD column,  $n$ -Hexane/ $i$ -PrOH = 80:20, flow rate = 1.0 mL/min, wavelength = 254 nm,  $t_R = 3.632$  min for minor isomer,  $t_R = 4.355$  min for major isomer).

**diisopropyl (*R, R*)-1-(1-(tert-butoxycarbonyl)-5-(3-fluorophenyl)-2-isopropyl-3-oxo-2,3-dihydro-1H-pyrrol-2-yl)-2-(2-(ethoxycarbonyl)allyl)hydrazine-1,2-dicarboxylate (6c)**

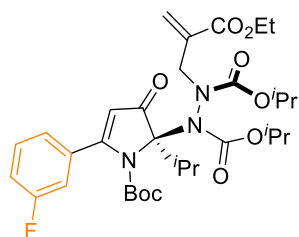

Yellow liquid, 61% yield.

**<sup>1</sup>H NMR** (500 MHz, CDCl<sub>3</sub>) δ 7.34 (td, *J* = 8.0, 5.6 Hz, 1H), 7.17 – 7.00 (m, 3H), 6.29 (s, 1H), 5.67 (s, 1H), 5.47 (s, 1H), 4.95 (ddq, *J* = 25.7, 12.9, 6.4 Hz, 2H), 4.62 (s, 1H), 4.40 – 4.12 (m, 3H), 3.20 (s, 1H), 1.40 – 1.20 (m, 16H), 1.12 (d, *J* = 13.5 Hz, 11H), 1.00 (d, *J* = 7.0 Hz, 3H). **<sup>13</sup>C NMR** (126 MHz, CDCl<sub>3</sub>) δ 194.01, 166.22, 162.34 (d, *J* = 246.96), 148.67, 136.97 (d, *J* = 131.04), 129.62 (d, *J* = 7.56), 123.86, 122.41, 116.08 (d, *J* = 23.94), 113.96 (d, *J* = 24.94), 110.59, 82.60, 70.87, 60.30, 55.57, 31.16, 27.41, 21.91, 21.70, 17.57, 16.00, 14.09. **<sup>19</sup>F NMR** (471 MHz, CDCl<sub>3</sub>) δ -110.02. **HRMS** (ESI, *m/z*): calcd. for C<sub>32</sub>H<sub>44</sub>FN<sub>3</sub>O<sub>9</sub> [M+H]<sup>+</sup> 634.3135, found 634.3143.

**Specific Rotation:** [α]<sub>D</sub><sup>25</sup> = -98.3 (*c* = 1.0, CHCl<sub>3</sub>). 91% ee (HPLC condition: Chiralcel IB column, *n*-Hexane/*i*-PrOH = 95:5, flow rate = 1.0 mL/min, wavelength = 254 nm, *t*<sub>R</sub> = 6.815 min for minor isomer, *t*<sub>R</sub> = 9.412 min for major isomer).

**diisopropyl (R, R)-1-(1-(tert-butoxycarbonyl)-5-(3-chlorophenyl)-2-isopropyl-3-oxo-2,3-dihydro-1H-pyrrol-2-yl)-2-(2-(ethoxycarbonyl)allyl)hydrazine-1,2-dicarboxylate (6d)**

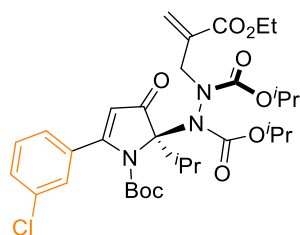

Yellow liquid, 70% yield.

**<sup>1</sup>H NMR** (500 MHz, CDCl<sub>3</sub>) δ 7.31 – 7.21 (m, 3H), 7.16 (d, *J* = 7.5 Hz, 1H), 6.21 (s, 1H), 5.59 (s, 1H), 5.39 (s, 1H), 4.87 (dtd, *J* = 26.3, 12.8, 12.0, 5.7 Hz, 2H), 4.72 – 4.44 (m, 1H), 4.24 – 4.08 (m, 3H), 3.31 – 2.76 (m, 1H), 1.19 (ddd, *J* = 29.7, 13.9, 6.7 Hz, 15H), 1.05 (d, *J* = 11.6 Hz, 12H), 0.92 (d, *J* = 7.1 Hz, 3H). **<sup>13</sup>C NMR** (126 MHz, CDCl<sub>3</sub>) δ 193.92, 166.17, 153.50, 148.60, 137.45, 136.08, 134.02, 129.31, 126.82, 124.76, 110.56, 82.63, 70.83, 60.27, 55.54, 31.19, 27.39, 21.88, 21.67, 17.61, 15.96, 14.08. **HRMS** (ESI, *m/z*): calcd. for C<sub>32</sub>H<sub>44</sub>ClN<sub>3</sub>O<sub>9</sub> [M+Na]<sup>+</sup> 672.2658, found 672.2662.

**Specific Rotation:** [α]<sub>D</sub><sup>25</sup> = -70.9 (*c* = 1.0, CHCl<sub>3</sub>). 98% ee (HPLC condition: Chiralcel OD column, *n*-Hexane/*i*-PrOH = 80:20, flow rate = 1.0 mL/min, wavelength = 254 nm, *t*<sub>R</sub> = 3.682 min for minor isomer, *t*<sub>R</sub> = 4.778 min for major isomer).



**diisopropyl (R, R)-1-(1-(tert-butoxycarbonyl)-5-(4-ethoxyphenyl)-2-isopropyl-3-oxo-2,3-dihydro-1H-pyrrol-2-yl)-2-(2-(ethoxycarbonyl)allyl)hydrazine-1,2-dicarboxylate (6e)**

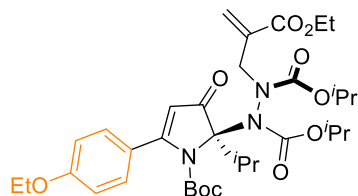

Yellow liquid, 69% yield.

$^1\text{H NMR}$  (500 MHz,  $\text{CDCl}_3$ )  $\delta$  7.28 (d,  $J = 8.9$  Hz, 2H), 6.89 (d,  $J = 8.9$  Hz, 2H), 6.29 (s, 1H), 5.67 (s, 1H), 5.42 (s, 1H), 4.94 (ddt,  $J = 24.2, 12.7, 6.3$  Hz, 2H), 4.61 (dd,  $J = 25.1, 12.1$  Hz, 1H), 4.29 – 4.18 (m, 3H), 4.07 (q,  $J = 7.0$  Hz, 2H), 3.17-3.11 (m, 1H), 1.41 (d,  $J = 7.0$  Hz, 3H), 1.31 – 1.18 (m, 18H), 1.13 (s, 9H), 1.00 (d,  $J = 7.0$  Hz, 3H).  $^{13}\text{C NMR}$  (126 MHz,  $\text{CDCl}_3$ )  $\delta$  193.85, 166.22, 160.32, 149.15, 137.43, 128.17, 128.11, 126.33, 125.93, 123.66, 114.08, 109.47, 82.19, 70.68, 63.69, 60.24, 55.55, 31.48, 27.46, 27.36, 21.89, 21.69, 17.63, 16.11, 14.53, 14.08.

**HRMS** (ESI,  $m/z$ ): calcd. for  $\text{C}_{34}\text{H}_{49}\text{N}_3\text{O}_{10}$   $[\text{M}+\text{Na}]^+$  682.331, found 682.3315.

**Specific Rotation:**  $[\alpha]_D^{25} = -122.8$  ( $c = 1.0$ ,  $\text{CHCl}_3$ ). 95% ee (HPLC condition: Chiralcel IB-3 column,  $n$ -Hexane/ $i$ -PrOH = 80:20, flow rate = 1.0 mL/min, wavelength = 254 nm,  $t_R = 5.238$  min for minor isomer,  $t_R = 5.705$  min for major isomer).

**diisopropyl (R, R)-1-(1-(tert-butoxycarbonyl)-2-isopropyl-3-oxo-5-(p-tolyl)-2,3-dihydro-1H-pyrrol-2-yl)-2-(2-(ethoxycarbonyl)allyl)hydrazine-1,2-dicarboxylate (6f)**

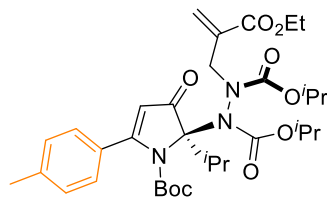

Yellow liquid, 55% yield.

$^1\text{H NMR}$  (500 MHz,  $\text{CDCl}_3$ )  $\delta$  7.23 (d,  $J = 7.8$  Hz, 2H), 7.17 (d,  $J = 7.9$  Hz, 2H), 6.29 (s, 1H), 5.67 (s, 1H), 5.43 (s, 1H), 4.95 (dp,  $J = 17.2, 6.3$  Hz, 2H), 4.62 (s, 1H), 4.34 – 3.97 (m, 3H), 3.18 (s, 1H), 2.38 (s, 3H), 1.40 – 1.18 (m, 16H), 1.11 (d,  $J = 14.6$  Hz, 11H), 1.01 (d,  $J = 7.0$  Hz, 3H).  $^{13}\text{C NMR}$  (126 MHz,  $\text{CDCl}_3$ )  $\delta$  194.15, 166.25, 153.44, 149.04, 139.65, 137.49, 131.46, 128.51, 126.61, 123.79, 109.88, 82.25, 70.78, 60.25, 55.61, 31.46, 27.39, 21.91, 21.71, 21.17, 17.71, 16.09, 14.09. **HRMS** (ESI,  $m/z$ ): calcd. for  $\text{C}_{33}\text{H}_{47}\text{N}_3\text{O}_9$   $[\text{M}+\text{Na}]^+$  652.3204, found 652.3219.

**Specific Rotation:**  $[\alpha]_D^{25} = -103.4$  ( $c = 1.0$ ,  $\text{CHCl}_3$ ). 95% ee (HPLC condition: Chiralcel IB column,  $n$ -Hexane/ $i$ -PrOH = 99:1, flow rate = 0.75 mL/min, wavelength = 254 nm,  $t_R = 8.290$  min for minor isomer,  $t_R = 10.952$  min for major isomer).

**diisopropyl (*R,R*)-1-(1-(tert-butoxycarbonyl)-5-(4-ethylphenyl)-2-isopropyl-3-oxo-2,3-dihydro-1H-pyrrol-2-yl)-2-(2-(ethoxycarbonyl)allyl)hydrazine-1,2-dicarboxylate (6g)**

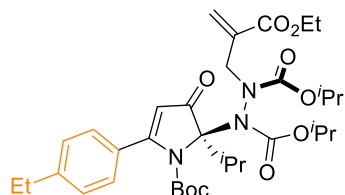

Yellow liquid, 63% yield.

**$^1\text{H}$  NMR** (500 MHz,  $\text{CDCl}_3$ )  $\delta$  7.30 – 7.24 (m, 2H), 7.20 (d,  $J = 8.1$  Hz, 2H), 6.29 (s, 1H), 5.68 (s, 1H), 5.44 (s, 1H), 4.94 (ddq,  $J = 24.5, 12.4, 6.3$  Hz, 2H), 4.60 (d,  $J = 18.3$  Hz, 1H), 4.32 – 4.14 (m, 3H), 3.39 – 2.95 (m, 1H), 2.68 (q,  $J = 7.6$  Hz, 2H), 1.34 – 1.21 (m, 18H), 1.15 – 1.00 (m, 15H).  **$^{13}\text{C}$  NMR** (126 MHz,  $\text{CDCl}_3$ )  $\delta$  194.29, 166.22, 165.86, 149.00, 146.13, 137.49, 131.65, 127.36, 126.67, 126.58, 125.97, 123.71, 109.82, 82.16, 70.68, 60.23, 55.57, 31.42, 27.34, 27.26, 21.90, 21.69, 17.74, 16.07, 15.38, 14.08. **HRMS** (ESI,  $m/z$ ): calcd. for  $\text{C}_{34}\text{H}_{49}\text{N}_3\text{O}_7$   $[\text{M}+\text{Na}]^+$  666.3361, found 666.3366.

**Specific Rotation:**  $[\alpha]_D^{25} = -148.6$  ( $c = 1.0$ ,  $\text{CHCl}_3$ ). 98% ee (HPLC condition: Chiralcel OD column,  $n$ -Hexane/ $i$ -PrOH = 90:10, flow rate = 1.0 mL/min, wavelength = 254 nm,  $t_R = 4.545$  min for minor isomer,  $t_R = 6.045$  min for major isomer).

**diisopropyl (*R,R*)-1-(1-(tert-butoxycarbonyl)-2-isopropyl-3-oxo-5-(4-propylphenyl)-2,3-dihydro-1H-pyrrol-2-yl)-2-(2-(ethoxycarbonyl)allyl)hydrazine-1,2-dicarboxylate (6h)**

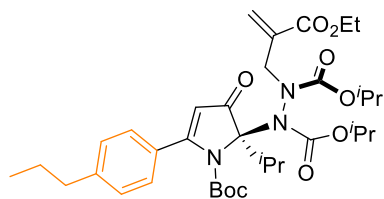

Yellow liquid, 61% yield.

**$^1\text{H}$  NMR** (500 MHz,  $\text{CDCl}_3$ )  $\delta$  7.29 – 7.23 (m, 2H), 7.18 (d,  $J = 7.8$  Hz, 2H), 6.29 (s, 1H), 5.68 (s, 1H), 5.44 (s, 1H), 4.94 (dp,  $J = 23.7, 6.2$  Hz, 2H), 4.63 (s, 1H), 4.43 – 4.10 (m, 3H), 3.18 (s, 1H), 2.62 (t,  $J = 7.6$  Hz, 2H), 1.66 (dt,  $J = 14.9, 8.0$  Hz, 3H), 1.40 – 1.19 (m, 15H), 1.17 – 0.99 (m, 14H), 0.95 (t,  $J = 7.3$  Hz, 3H).  **$^{13}\text{C}$  NMR** (126 MHz,  $\text{CDCl}_3$ )  $\delta$  194.27, 166.25, 153.39,

149.02, 144.50, 137.50, 131.67, 127.97, 126.59, 123.95, 109.88, 82.19, 70.77, 60.25, 55.58, 37.82, 31.35, 27.36, 24.30, 21.91, 21.70, 17.72, 16.08, 14.09, 13.49. **HRMS** (ESI, m/z): calcd. for C<sub>35</sub>H<sub>51</sub>N<sub>3</sub>O<sub>9</sub> [M+H]<sup>+</sup> 658.3698, found 658.3705.

**Specific Rotation:**  $[\alpha]_D^{25} = -159.6$  ( $c = 1.0$ , CHCl<sub>3</sub>). 95% ee (HPLC condition: Chiralcel OD column, *n*-Hexane/*i*-PrOH = 99:1, flow rate = 0.5 mL/min, wavelength = 254 nm,  $t_R = 6.245$  min for minor isomer,  $t_R = 7.915$  min for major isomer).

**diisopropyl (R, R)-1-(1-(tert-butoxycarbonyl)-5-(4-butylphenyl)-2-isopropyl-3-oxo-2,3-dihydro-1H-pyrrol-2-yl)-2-(2-(ethoxycarbonyl)allyl)hydrazine-1,2-dicarboxylate (6i)**

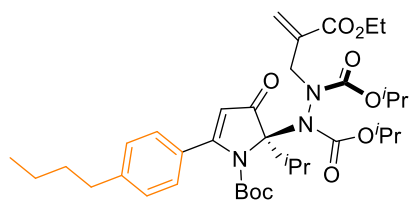

Yellow liquid, 63% yield.

**<sup>1</sup>H NMR** (500 MHz, CDCl<sub>3</sub>)  $\delta$  7.32 – 7.15 (m, 4H), 6.29 (s, 1H), 5.68 (s, 1H), 5.44 (s, 1H), 4.94 (dp,  $J = 23.8, 6.3$  Hz, 2H), 4.63 (s, 1H), 4.40 – 4.07 (m, 3H), 3.17 (s, 1H), 2.64 (t,  $J = 7.7$  Hz, 2H), 1.74 – 1.56 (m, 3H), 1.46 – 1.19 (m, 18H), 1.15 – 1.00 (m, 13H), 0.93 (t,  $J = 7.4$  Hz, 3H). **<sup>13</sup>C NMR** (126 MHz, CDCl<sub>3</sub>)  $\delta$  194.27, 166.25, 153.34, 149.02, 144.75, 137.50, 131.63, 127.92, 126.60, 123.77, 109.84, 82.19, 70.77, 60.25, 55.59, 35.39, 33.42, 31.44, 27.35, 22.10, 21.91, 21.70, 17.72, 16.08, 14.09, 13.64. **HRMS** (ESI, m/z): calcd. for C<sub>36</sub>H<sub>53</sub>N<sub>3</sub>O<sub>9</sub> [M+H]<sup>+</sup> 672.3855, found 678.3859.

**Specific Rotation:**  $[\alpha]_D^{25} = -208.6$  ( $c = 1.0$ , CHCl<sub>3</sub>). 95% ee (HPLC condition: Chiralcel OD column, *n*-Hexane/*i*-PrOH = 99:1, flow rate = 0.5 mL/min, wavelength = 254 nm,  $t_R = 8.730$  min for major isomer,  $t_R = 11.938$  min for minor isomer).

**diisopropyl (R, R)-1-(1-(tert-butoxycarbonyl)-5-(4-(tert-butyl)phenyl)-2-isopropyl-3-oxo-2,3-dihydro-1H-pyrrol-2-yl)-2-(2-(ethoxycarbonyl)allyl)hydrazine-1,2-dicarboxylate (6j)**

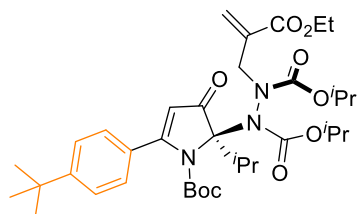

Yellow liquid, 68% yield.

**<sup>1</sup>H NMR** (500 MHz, CDCl<sub>3</sub>) δ 7.40 (d, *J* = 8.1 Hz, 2H), 7.27 (d, *J* = 8.3 Hz, 2H), 6.30 (s, 1H), 5.68 (s, 1H), 5.45 (s, 1H), 4.94 (ddd, *J* = 23.4, 12.6, 6.4 Hz, 2H), 4.62 (s, 1H), 4.44 – 4.03 (m, 3H), 3.18 (s, 1H), 1.41 – 1.18 (m, 25H), 1.17 – 0.97 (m, 14H). **<sup>13</sup>C NMR** (126 MHz, CDCl<sub>3</sub>) δ 194.19, 166.24, 153.05, 148.96, 137.50, 131.39, 126.42, 126.35, 124.76, 123.71, 109.76, 82.11, 70.74, 60.23, 55.55, 34.71, 31.14, 27.29, 21.91, 21.69, 17.71, 16.07, 14.08. **HRMS** (ESI, *m/z*): calcd. for C<sub>36</sub>H<sub>53</sub>N<sub>3</sub>O<sub>9</sub> [M+Na]<sup>+</sup> 694.3674, found 694.3672.

**Specific Rotation:** [α]<sup>25</sup><sub>D</sub> = -94.3 (*c* = 1.0, CHCl<sub>3</sub>). 95% ee (HPLC condition: Chiralcel OD column, *n*-Hexane/*i*-PrOH = 99:1, flow rate = 0.5 mL/min, wavelength = 254 nm, *t*<sub>R</sub> = 11.073 min for major isomer, *t*<sub>R</sub> = 13.707 min for minor isomer).

**diisopropyl (R, R)-1-(5-([1,1'-biphenyl]-4-yl)-1-(tert-butoxycarbonyl)-2-isopropyl-3-oxo-2,3-dihydro-1H-pyrrol-2-yl)-2-(2-(ethoxycarbonyl)allyl)hydrazine-1,2-dicarboxylate (6k)**

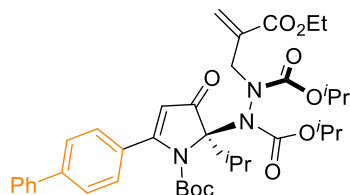

Yellow liquid, 65% yield.

**<sup>1</sup>H NMR** (500 MHz, CDCl<sub>3</sub>) δ 7.59 (dd, *J* = 13.4, 7.5 Hz, 4H), 7.47 – 7.33 (m, 5H), 6.30 (s, 1H), 5.69 (s, 1H), 5.51 (s, 1H), 4.96 (ddt, *J* = 21.5, 13.2, 6.2 Hz, 2H), 4.64 (s, 1H), 4.43 – 4.10 (m, 3H), 3.21 (s, 1H), 1.29 (ddp, *J* = 28.3, 22.0, 8.7, 7.7 Hz, 15H), 1.19 – 1.00 (m, 15H). **<sup>13</sup>C NMR** (126 MHz, CDCl<sub>3</sub>) δ 194.14, 166.26, 153.40, 148.97, 142.65, 140.32, 137.53, 133.24, 128.86, 127.79, 127.14, 127.01, 126.60, 110.14, 82.47, 70.84, 60.29, 55.60, 31.38, 27.43, 21.95, 21.74, 17.72, 16.10, 14.12. **HRMS** (ESI, *m/z*): calcd. for C<sub>38</sub>H<sub>49</sub>N<sub>3</sub>O<sub>9</sub> [M+H]<sup>+</sup> 692.3542, found 692.3549.

**Specific Rotation:** [α]<sup>25</sup><sub>D</sub> = -126.8 (*c* = 1.0, CHCl<sub>3</sub>). 93% ee (HPLC condition: Chiralcel IA column, *n*-Hexane/*i*-PrOH = 90:10, flow rate = 1.0 mL/min, wavelength = 254 nm, *t*<sub>R</sub> = 5.247 min for minor isomer, *t*<sub>R</sub> = 7.067 min for major isomer).

**diisopropyl (R, R)-1-(1-(tert-butoxycarbonyl)-5-(4-fluorophenyl)-2-isopropyl-3-oxo-2,3-dihydro-1H-pyrrol-2-yl)-2-(2-(ethoxycarbonyl)allyl)hydrazine-1,2-dicarboxylate (6l)**

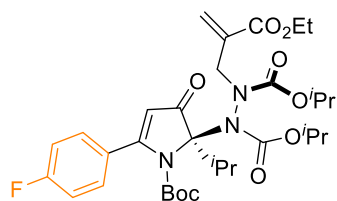

White solid, m.p. 70-72 °C, 65% yield.

**<sup>1</sup>H NMR** (500 MHz, CDCl<sub>3</sub>) δ 7.34 (dd, *J* = 8.3, 5.2 Hz, 2H), 7.08 (t, *J* = 8.3 Hz, 2H), 6.29 (s, 1H), 5.67 (s, 1H), 5.44 (s, 1H), 4.94 (ddt, *J* = 24.7, 13.4, 6.5 Hz, 2H), 4.60 (d, *J* = 20.6 Hz, 1H), 4.22 (ddt, *J* = 11.7, 7.0, 4.3 Hz, 3H), 3.37 – 2.89 (m, 1H), 1.26 (ddd, *J* = 27.0, 14.3, 6.7 Hz, 15H), 1.12 (s, 12H), 1.00 (d, *J* = 7.0 Hz, 3H). **<sup>13</sup>C NMR** (126 MHz, CDCl<sub>3</sub>) δ 193.90, 166.18, 164.41, 162.42, 153.28, 148.82, 137.47 (d, *J* = 5.04 Hz), 137.44 (d, *J* = 1.26 Hz), 128.58 (d, *J* = 8.82 Hz), 123.76, 115.02 (d, *J* = 22.68 Hz), 110.37, 82.52, 70.76, 60.26, 55.56, 31.43, 27.44, 21.89, 21.68, 17.57, 16.02, 14.07. **<sup>19</sup>F NMR** (471 MHz, CDCl<sub>3</sub>) δ -112.50. **HRMS** (ESI, *m/z*): calcd. for C<sub>32</sub>H<sub>44</sub>FN<sub>3</sub>O<sub>9</sub> [M+Na]<sup>+</sup> 656.2954, found 656.2956.

**Specific Rotation:** [α]<sub>D</sub><sup>25</sup> = -255.1 (*c* = 1.0, CHCl<sub>3</sub>). 95% ee (HPLC condition: Chiralcel OD column, *n*-Hexane/*i*-PrOH = 90:10, flow rate = 1.0 mL/min, wavelength = 254 nm, *t*<sub>R</sub> = 4.507 min for minor isomer, *t*<sub>R</sub> = 6.155 min for major isomer).

**diisopropyl (R,R)-1-(1-(tert-butoxycarbonyl)-2-isopropyl-3-oxo-5-(4-(trifluoromethyl)phenyl)-2,3-dihydro-1H-pyrrol-2-yl)-2-(2-(ethoxycarbonyl)allyl)hydrazine-1,2-dicarboxylate (6m)**

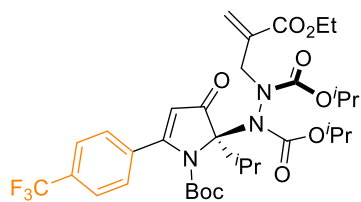

White solid, m.p. 74-76 °C, 60% yield.

**<sup>1</sup>H NMR** (500 MHz, CDCl<sub>3</sub>) δ 7.66 (d, *J* = 7.9 Hz, 2H), 7.48 (d, *J* = 7.9 Hz, 2H), 6.30 (s, 1H), 5.67 (s, 1H), 5.49 (s, 1H), 4.97 (dtq, *J* = 18.9, 12.9, 7.1 Hz, 2H), 4.62 (d, *J* = 20.5 Hz, 1H), 4.33 – 4.16 (m, 3H), 3.18 (dd, *J* = 27.6, 11.3 Hz, 1H), 1.34 – 1.20 (m, 15H), 1.17 – 0.98 (m, 15H). **<sup>13</sup>C NMR** (126 MHz, CDCl<sub>3</sub>) δ 193.80, 166.13, 157.49, 153.37, 153.33, 148.51, 137.80 (q, *J* = 83.16 Hz), 127.03, 125.96, 124.79 (q, *J* = 535.50 Hz), 124.87 (q, *J* = 2.52 Hz), 123.68, 110.90, 82.81, 70.82, 60.25, 55.53, 30.98, 27.29, 21.86, 21.64, 17.51, 15.91, 14.03. **<sup>19</sup>F NMR** (471 MHz, CDCl<sub>3</sub>) δ -63.05. **HRMS** (ESI, *m/z*): calcd. for C<sub>33</sub>H<sub>44</sub>F<sub>3</sub>N<sub>3</sub>O<sub>9</sub> [M+Na]<sup>+</sup> 706.2922, found

706.2925.

**Specific Rotation:**  $[\alpha]_D^{25} = -258.4$  ( $c = 1.0$ ,  $\text{CHCl}_3$ ). 97% ee (HPLC condition: Chiralcel OD column,  $n$ -Hexane/ $i$ -PrOH = 90:10, flow rate = 1.0 mL/min, wavelength = 254 nm,  $t_R = 4.222$  min for minor isomer,  $t_R = 5.358$  min for major isomer).

**diisopropyl (*R,R*)-1-(1-(tert-butoxycarbonyl)-2-isopropyl-3-oxo-5-phenyl-2,3-dihydro-1H-pyrrol-2-yl)-2-(2-(methoxycarbonyl)allyl)hydrazine-1,2-dicarboxylate (6n)**

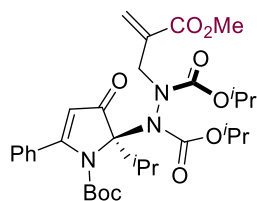

Yellow liquid, 63% yield.

**<sup>1</sup>H NMR** (500 MHz,  $\text{CDCl}_3$ )  $\delta$  7.36 (q,  $J = 7.9$  Hz, 5H), 6.28 (s, 1H), 5.69 (s, 1H), 5.43 (s, 1H), 4.94 (dh,  $J = 26.8, 7.7, 7.1$  Hz, 2H), 4.71 – 4.46 (m, 1H), 4.28 (dt,  $J = 16.7, 7.3$  Hz, 1H), 3.73 (s, 3H), 3.45 – 2.80 (m, 1H), 1.23 (dt,  $J = 14.7, 7.1$  Hz, 15H), 1.14 – 1.00 (m, 12H). **<sup>13</sup>C NMR** (126 MHz,  $\text{CDCl}_3$ )  $\delta$  194.19, 166.69, 153.42, 148.89, 137.33, 134.40, 129.34, 127.91, 126.58, 124.25, 110.14, 82.31, 70.74, 55.39, 51.33, 31.37, 27.32, 21.88, 21.67, 17.67, 15.99. **HRMS** (ESI,  $m/z$ ): calcd. for  $\text{C}_{31}\text{H}_{43}\text{N}_3\text{O}_9$   $[\text{M}+\text{Na}]^+$  624.2891, found 624.2891.

**Specific Rotation:**  $[\alpha]_D^{25} = -78.2$  ( $c = 1.0$ ,  $\text{CHCl}_3$ ). 97% ee (HPLC condition: Chiralcel OD column,  $n$ -Hexane/ $i$ -PrOH = 90:10, flow rate = 1.0 mL/min, wavelength = 254 nm,  $t_R = 5.047$  min for minor isomer,  $t_R = 8.123$  min for major isomer).

**diisopropyl (*R,R*)-1-(1-(tert-butoxycarbonyl)-2-isopropyl-3-oxo-5-phenyl-2,3-dihydro-1H-pyrrol-2-yl)-2-(2-(isopropoxycarbonyl)allyl)hydrazine-1,2-dicarboxylate (6o)**

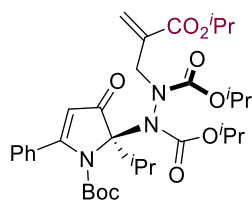

Yellow liquid, 75% yield.

**<sup>1</sup>H NMR** (500 MHz,  $\text{CDCl}_3$ )  $\delta$  7.41 – 7.33 (m, 5H), 6.28 (s, 1H), 5.65 (s, 1H), 5.46 (s, 1H), 5.08 (pd,  $J = 6.2, 2.9$  Hz, 1H), 4.96 (ddt,  $J = 20.6, 14.2, 7.1$  Hz, 2H), 4.73 – 4.56 (m, 1H), 4.29 (d,  $J = 18.0$  Hz, 1H), 3.20-3.08 (m, 1H), 1.33 – 1.19 (m, 18H), 1.15 – 1.00 (m, 15H). **<sup>13</sup>C NMR** (126 MHz,  $\text{CDCl}_3$ )  $\delta$  194.14, 165.69, 158.10, 153.42, 148.88, 137.71, 134.43, 129.32, 127.90,

126.57, 123.17, 110.19, 82.23, 70.76, 67.66, 55.73, 31.31, 27.33, 21.90, 21.74, 21.69, 17.70, 16.11. **HRMS** (ESI, m/z): calcd. for C<sub>33</sub>H<sub>47</sub>N<sub>3</sub>O<sub>9</sub> [M+Na]<sup>+</sup> 652.3204, found 652.3211.

**Specific Rotation:** [ $\alpha$ ]<sub>D</sub><sup>25</sup> = -101.6 (*c* = 1.0, CHCl<sub>3</sub>). 90% ee (HPLC condition: Chiralcel OD column, *n*-Hexane/*i*-PrOH = 97:3, flow rate = 1.0 mL/min, wavelength = 254 nm, *t*<sub>R</sub> = 7.025 min for minor isomer, *t*<sub>R</sub> = 10.262 min for major isomer).

**diisopropyl (R, R)-1-(2-((allyloxy)carbonyl)allyl)-2-(1-(tert-butoxycarbonyl)-2-isopropyl-3-oxo-5-phenyl-2,3-dihydro-1H-pyrrol-2-yl)hydrazine-1,2-dicarboxylate (6p)**

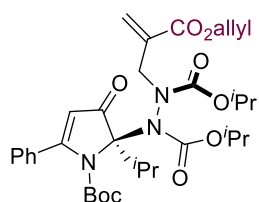

Yellow liquid, 72% yield.

**<sup>1</sup>H NMR** (500 MHz, CDCl<sub>3</sub>)  $\delta$  7.54 – 7.31 (m, 5H), 6.33 (s, 1H), 5.95 (ddt, *J* = 16.5, 11.0, 5.6 Hz, 1H), 5.72 (s, 1H), 5.45 (s, 1H), 5.32 (d, *J* = 17.2 Hz, 1H), 5.20 (d, *J* = 10.6 Hz, 1H), 4.95 (dp, *J* = 18.1, 6.5 Hz, 2H), 4.66 (s, 3H), 4.30 (d, *J* = 17.8 Hz, 1H), 3.42 – 2.93 (m, 1H), 1.38 – 1.20 (m, 12H), 1.19 – 0.75 (m, 15H). **<sup>13</sup>C NMR** (126 MHz, CDCl<sub>3</sub>)  $\delta$  194.21, 165.82, 158.31, 153.30, 148.89, 137.28, 134.39, 132.42, 129.34, 127.90, 126.58, 124.11, 117.55, 110.17, 82.30, 70.78, 64.95, 55.54, 31.35, 27.34, 21.90, 21.69, 17.64, 16.04. **HRMS** (ESI, m/z): calcd. for C<sub>33</sub>H<sub>45</sub>N<sub>3</sub>O<sub>9</sub> [M+Na]<sup>+</sup> 650.3048, found 650.3951.

**Specific Rotation:** [ $\alpha$ ]<sub>D</sub><sup>25</sup> = -147.7 (*c* = 1.0, CHCl<sub>3</sub>). 96% ee (HPLC condition: Chiralcel OD column, *n*-Hexane/*i*-PrOH = 90:10, flow rate = 1.0 mL/min, wavelength = 254 nm, *t*<sub>R</sub> = 4.567 min for minor isomer, *t*<sub>R</sub> = 6.203 min for major isomer).

**diisopropyl (R, R)-1-(1-(tert-butoxycarbonyl)-2-cyclopentyl-3-oxo-5-phenyl-2,3-dihydro-1H-pyrrol-2-yl)-2-(2-(ethoxycarbonyl)allyl)hydrazine-1,2-dicarboxylate (6q)**

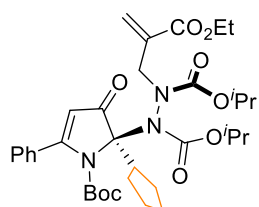

Yellow liquid, 55% yield.

**<sup>1</sup>H NMR** (500 MHz, CDCl<sub>3</sub>)  $\delta$  7.36 (dt, *J* = 20.0, 6.5 Hz, 5H), 6.30 (d, *J* = 5.6 Hz, 1H), 5.76

(d,  $J = 5.5$  Hz, 1H), 5.53 (d,  $J = 5.7$  Hz, 1H), 5.08 – 4.84 (m, 2H), 4.86 – 4.59 (m, 1H), 4.32 (dd,  $J = 17.4, 5.6$  Hz, 1H), 4.22 (dt,  $J = 13.2, 6.5$  Hz, 2H), 3.36 (s, 1H), 2.49 – 2.21 (m, 1H), 1.86 – 1.69 (m, 2H), 1.52 (dq,  $J = 22.1, 9.3, 7.4$  Hz, 5H), 1.26 (dq,  $J = 27.6, 6.6$  Hz, 13H), 1.04 (s, 9H), 0.87 (dd,  $J = 15.3, 7.5$  Hz, 2H).  $^{13}\text{C}$  NMR (126 MHz,  $\text{CDCl}_3$ )  $\delta$  194.83, 168.95, 166.41, 153.33, 149.08, 137.84, 134.65, 129.32, 127.98, 126.51, 123.88, 110.75, 82.25, 70.77, 60.28, 55.34, 42.87, 29.61, 27.32, 26.19, 24.95, 23.80, 21.95, 21.71, 14.14. **HRMS** (ESI,  $m/z$ ): calcd. for  $\text{C}_{34}\text{H}_{47}\text{N}_3\text{O}_9$   $[\text{M}+\text{H}]^+$  642.3385, found 642.3391.

**Specific Rotation:**  $[\alpha]_{\text{D}}^{25} = 97.0$  ( $c = 1.0$ ,  $\text{CHCl}_3$ ). 95% ee (HPLC condition: Chiralcel OD column,  $n$ -Hexane/ $i$ -PrOH = 90:10, flow rate = 1.0 mL/min, wavelength = 254 nm,  $t_{\text{R}} = 6.393$  min for minor isomer,  $t_{\text{R}} = 6.952$  min for major isomer).

**diisopropyl (R, R)-1-(1-(tert-butoxycarbonyl)-2-cyclohexyl-3-oxo-5-phenyl-2,3-dihydro-1H-pyrrol-2-yl)-2-(2-(ethoxycarbonyl)allyl)hydrazine-1,2-dicarboxylate (6r)**

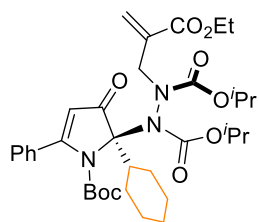

Yellow liquid, 53% yield.

$^1\text{H}$  NMR (500 MHz,  $\text{CDCl}_3$ )  $\delta$  7.46 – 7.28 (m, 5H), 6.30 (s, 1H), 5.69 (s, 1H), 5.40 (s, 1H), 4.95 (dp,  $J = 18.3, 6.3$  Hz, 2H), 4.59 (d,  $J = 19.6$  Hz, 1H), 4.21 (dtq,  $J = 11.1, 7.7, 3.9$  Hz, 3H), 2.97 (s, 1H), 1.97 (d,  $J = 13.9$  Hz, 1H), 1.83 – 1.70 (m, 3H), 1.63 (d,  $J = 13.1$  Hz, 2H), 1.37 – 1.18 (m, 19H), 1.13 – 1.04 (m, 9H).  $^{13}\text{C}$  NMR (126 MHz,  $\text{CDCl}_3$ )  $\delta$  194.60, 170.80, 166.43, 157.71, 149.01, 137.47, 134.59, 129.50, 128.05, 128.01, 126.84, 126.69, 126.33, 109.95, 82.34, 70.78, 60.41, 55.69, 27.62, 27.53, 27.39, 27.10, 26.39, 26.35, 22.09, 21.96, 21.84, 14.23. **HRMS** (ESI,  $m/z$ ): calcd. for  $\text{C}_{35}\text{H}_{49}\text{N}_3\text{O}_9$   $[\text{M}+\text{Na}]^+$  678.3361, found 678.3364.

**Specific Rotation:**  $[\alpha]_{\text{D}}^{25} = 55.5$  ( $c = 1.0$ ,  $\text{CHCl}_3$ ). 95% ee (HPLC condition: Chiralcel IC column,  $n$ -Hexane/ $i$ -PrOH = 90:10, flow rate = 1.0 mL/min, wavelength = 254 nm,  $t_{\text{R}} = 21.308$  min for major isomer,  $t_{\text{R}} = 29.04$  min for minor isomer).

**diisopropyl (R, R)-1-(1-(tert-butoxycarbonyl)-3-oxo-5-phenyl-2-propyl-2,3-dihydro-1H-pyrrol-2-yl)-2-(2-(ethoxycarbonyl)allyl)hydrazine-1,2-dicarboxylate (6s)**



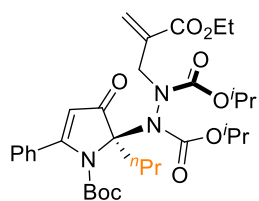

Yellow liquid, 1:2 dr, 48% yield.

**<sup>1</sup>H NMR** (500 MHz, CDCl<sub>3</sub>) δ 7.47 – 7.30 (m, 5H), 6.41 (s, 1H), 6.01 (s, 1H), 5.59 (s, 1H), 4.87 (ddt, *J* = 37.9, 12.0, 6.0 Hz, 2H), 4.59 (dd, *J* = 17.8, 7.5 Hz, 1H), 4.49 – 4.32 (m, 1H), 4.24 (q, *J* = 7.0 Hz, 2H), 2.84 (q, *J* = 13.1, 12.6 Hz, 1H), 1.80 (td, *J* = 11.6, 5.7 Hz, 1H), 1.35 – 1.25 (m, 11H), 1.17 (dd, *J* = 10.7, 6.2 Hz, 6H), 1.10 (s, 9H), 0.86 (dt, *J* = 18.9, 7.3 Hz, 3H).

**<sup>13</sup>C NMR** (126 MHz, CDCl<sub>3</sub>) δ 195.89, 171.40, 171.40, 154.13, 149.04, 136.07, 134.97, 129.44, 127.91, 127.51, 126.79, 110.87, 84.24, 82.11, 70.38, 60.67, 55.08, 27.49, 22.55, 22.02, 21.83, 21.73, 15.58, 14.15, 13.82, 13.67. **<sup>1</sup>H NMR** (500 MHz, CDCl<sub>3</sub>) δ 7.37 (q, *J* = 5.8, 4.3 Hz, 5H), 6.34 (s, 1H), 5.80 (s, 1H), 5.54 (s, 1H), 5.01 (p, *J* = 6.3 Hz, 1H), 4.90 (dt, *J* = 13.8, 6.9 Hz, 1H), 4.74 (d, *J* = 16.9 Hz, 1H), 4.31 (dd, *J* = 16.9, 3.7 Hz, 1H), 4.21 (q, *J* = 7.2 Hz, 2H), 2.61 (td, *J* = 12.6, 4.4 Hz, 1H), 1.90 – 1.77 (m, 1H), 1.42 – 1.27 (m, 11H), 1.23 – 1.17 (m, 6H), 1.05 (s, 9H), 0.88 (dt, *J* = 20.9, 7.3 Hz, 3H). **<sup>13</sup>C NMR** (126 MHz, CDCl<sub>3</sub>) δ 195.88, 169.00, 166.42, 153.33, 149.26, 137.24, 134.51, 129.44, 127.98, 126.59, 125.09, 110.43, 84.45, 82.37, 70.56, 60.26, 53.52, 27.30, 22.60, 21.92, 21.82, 21.60, 15.72, 14.12, 14.01, 13.57. **HRMS** (ESI, *m/z*): calcd. for C<sub>32</sub>H<sub>45</sub>N<sub>3</sub>O<sub>9</sub> [M+H]<sup>+</sup> 616.3229, found 616.3234.

**Specific Rotation:** [α]<sub>D</sub><sup>25</sup> = 107.6 (*c* = 1.0, CHCl<sub>3</sub>). 80% ee (HPLC condition: Chiralcel IC column, *n*-Hexane/*i*-PrOH = 90:10, flow rate = 1.0 mL/min, wavelength = 254 nm, *t*<sub>R</sub> = 21.055 min for minor isomer, *t*<sub>R</sub> = 42.46 min for major isomer). 80% ee (HPLC condition: Chiralcel IC column, *n*-Hexane/*i*-PrOH = 90:10, flow rate = 1.0 mL/min, wavelength = 254 nm, *t*<sub>R</sub> = 21.672 min for major isomer, *t*<sub>R</sub> = 29.73 min for minor isomer).

**diisopropyl (R, R)-1-(1-(tert-butoxycarbonyl)-2-(4-nitrobenzyl)-3-oxo-5-phenyl-2,3-dihydro-1H-pyrrol-2-yl)-2-(2-(ethoxycarbonyl)allyl)hydrazine-1,2-dicarboxylate (6t)**

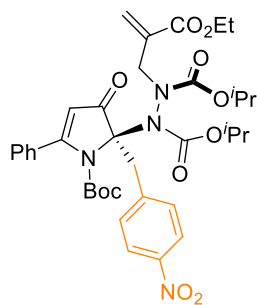

White solid, m.p. 83-85 °C, 79% yield.

**<sup>1</sup>H NMR** (500 MHz, CDCl<sub>3</sub>) δ 7.98 (d, *J* = 8.6 Hz, 2H), 7.32 (d, *J* = 8.6 Hz, 2H), 7.27 – 7.12 (m, 3H), 6.76 (d, *J* = 7.1 Hz, 2H), 6.30 (s, 1H), 5.73 (s, 1H), 5.10 (s, 1H), 5.05 – 4.79 (m, 2H), 4.77 – 4.60 (m, 1H), 4.19 – 4.08 (m, 3H), 4.05 (d, *J* = 12.2 Hz, 1H), 3.19 (d, *J* = 11.8 Hz, 1H), 1.41 – 1.21 (m, 9H), 1.16 (dd, *J* = 9.5, 6.2 Hz, 6H), 1.00 (s, 9H). **<sup>13</sup>C NMR** (126 MHz, CDCl<sub>3</sub>) δ 194.74, 168.84, 166.22, 157.34, 153.07, 149.35, 147.58, 141.00, 137.46, 133.37, 131.80, 129.33, 127.82, 126.35, 124.53, 122.82, 110.47, 83.02, 70.98, 62.17, 60.37, 54.29, 27.45, 27.30, 21.99, 21.91, 21.78, 21.58, 14.09. **HRMS** (ESI, *m/z*): calcd. for C<sub>36</sub>H<sub>44</sub>N<sub>4</sub>O<sub>11</sub> [M+Na]<sup>+</sup> 731.2899, found 731.2894.

**Specific Rotation:** [α]<sub>D</sub><sup>25</sup> = 41.5 (*c* = 1.0, CHCl<sub>3</sub>). 94% ee (HPLC condition: Chiralcel IA column, *n*-Hexane/*i*-PrOH = 90:10, flow rate = 1.0 mL/min, wavelength = 254 nm, *t<sub>R</sub>* = 8.142 min for major isomer, *t<sub>R</sub>* = 13.795 min for minor isomer).

**diisopropyl (R,R)-1-(1-(tert-butoxycarbonyl)-3-oxo-2,5-diphenyl-2,3-dihydro-1H-pyrrol-2-yl)-2-(2-(ethoxycarbonyl)allyl)hydrazine-1,2-dicarboxylate (6u)**

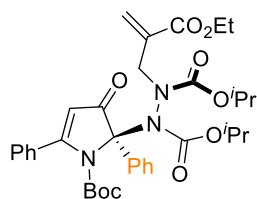

White solid, m.p. 78-80 °C, 65% yield.

**<sup>1</sup>H NMR** (500 MHz, CDCl<sub>3</sub>) δ 7.98 (dd, *J* = 6.9, 3.0 Hz, 2H), 7.56 – 7.29 (m, 8H), 5.74 (s, 1H), 5.60 (s, 1H), 5.13 – 4.85 (m, 2H), 4.41 (d, *J* = 18.7 Hz, 2H), 4.15 (qd, *J* = 7.0, 1.6 Hz, 3H), 1.63 – 1.51 (m, 2H), 1.46 – 1.38 (m, 2H), 1.33 – 1.17 (m, 11H), 1.08 (s, 9H). **<sup>13</sup>C NMR** (126 MHz, CDCl<sub>3</sub>) δ 194.91, 167.94, 166.21, 157.08, 153.46, 149.76, 135.49, 134.31, 132.53, 129.82, 129.36, 128.98, 128.13, 127.87, 126.25, 123.87, 109.20, 88.14, 82.32, 70.94, 59.89, 53.04, 27.16, 21.89, 21.79, 21.61, 13.99. **HRMS** (ESI, *m/z*): calcd. for C<sub>35</sub>H<sub>43</sub>N<sub>3</sub>O<sub>9</sub> [M+H]<sup>+</sup> 650.3072 ,

found 650.3077.

**Specific Rotation:**  $[\alpha]_D^{25} = 103.3$  ( $c = 1.0$ ,  $\text{CHCl}_3$ ). 40% ee (HPLC condition: Chiralcel IC column,  $n$ -Hexane/ $i$ -PrOH = 99:1, flow rate = 0.25 mL/min, wavelength = 254 nm,  $t_R = 17.608$  min for major isomer,  $t_R = 23.788$  min for minor isomer).

**diethyl (R)-1-(2-isopropyl-3-oxo-5-phenyl-2,3-dihydro-1H-pyrrol-2-yl)hydrazine-1,2-dicarboxylate (9)**

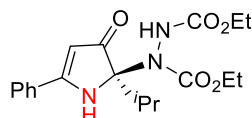

Yellow solid, m.p. 83-85 °C, 60% yield.

**$^1\text{H}$  NMR** (500 MHz,  $\text{CDCl}_3$ )  $\delta$  7.67 (d,  $J = 7.6$  Hz, 2H), 7.51 – 7.45 (m, 3H), 7.34 (s, 1H), 6.71 (s, 1H), 5.53 (s, 1H), 4.27 – 4.08 (m, 4H), 2.41 (dt,  $J = 13.3, 7.2$  Hz, 1H), 1.31 (t,  $J = 7.1$  Hz, 3H), 1.17 – 1.01 (m, 9H).  **$^{13}\text{C}$  NMR** (126 MHz,  $\text{CDCl}_3$ )  $\delta$  198.18, 172.82, 155.39, 131.69, 130.41, 128.87, 126.37, 97.24, 83.13, 62.88, 62.43, 33.70, 16.76, 14.34, 14.20, 13.97. **HRMS** (ESI,  $m/z$ ): calcd. for  $\text{C}_{19}\text{H}_{25}\text{N}_3\text{O}_5$   $[\text{M}+\text{Na}]^+$  398.1686, found 398.1690.

**Specific Rotation:**  $[\alpha]_D^{25} = -191.2$  ( $c = 1.0$ ,  $\text{CHCl}_3$ ). 98% ee (HPLC condition: Chiralcel OD column,  $n$ -Hexane/ $i$ -PrOH = 90:10, flow rate = 1.0 mL/min, wavelength = 254 nm,  $t_R = 6.915$  min for major isomer,  $t_R = 8.052$  min for minor isomer).

**diethyl (R)-1-(4-bromo-1-(tert-butoxycarbonyl)-2-isopropyl-3-oxo-5-phenyl-2,3-dihydro-1H-pyrrol-2-yl)hydrazine-1,2-dicarboxylate (10)**

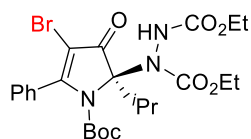

White solid, m.p. 70-72 °C, 91% yield.

**$^1\text{H}$  NMR** (500 MHz,  $\text{CDCl}_3$ )  $\delta$  7.56 – 7.39 (m, 3H), 7.36 (dt,  $J = 7.0, 3.7$  Hz, 2H), 4.47 – 4.00 (m, 4H), 3.00 (h,  $J = 6.8$  Hz, 1H), 1.31 (d,  $J = 7.1$  Hz, 3H), 1.20 (d,  $J = 7.1$  Hz, 3H), 1.12 (d,  $J = 6.4$  Hz, 3H), 1.11 – 0.86 (m, 12H).  **$^{13}\text{C}$  NMR** (126 MHz,  $\text{CDCl}_3$ )  $\delta$  188.10, 163.80, 155.02, 149.74, 132.68, 129.73, 128.09, 127.42, 85.24, 83.60, 63.37, 61.65, 32.27, 27.23, 16.91, 14.53, 14.14. **HRMS** (ESI,  $m/z$ ): calcd. for  $\text{C}_{24}\text{H}_{32}\text{BrN}_3\text{O}_7$   $[\text{M}+\text{Na}]^+$  576.1316, found 576.1318.

**Specific Rotation:**  $[\alpha]_D^{25} = -182.4$  ( $c = 1.0$ ,  $\text{CHCl}_3$ ). 96% ee (HPLC condition: Chiralcel AD

column, *n*-Hexane/*i*-PrOH = 90:10, flow rate = 1.0 mL/min, wavelength = 254 nm,  $t_R$  = 8.790 min for minor isomer,  $t_R$  = 13.622 min for major isomer).

**diethyl (R)-1-(1-(tert-butoxycarbonyl)-4-iodo-2-isopropyl-3-oxo-5-phenyl-2,3-dihydro-1H-pyrrol-2-yl)hydrazine-1,2-dicarboxylate (11)**

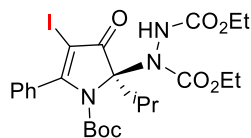

White solid, m.p. 123-125 °C, 88% yield.

**<sup>1</sup>H NMR** (500 MHz, CDCl<sub>3</sub>) δ 7.49 – 7.40 (m, 3H), 7.32 (dt,  $J$  = 6.2, 3.2 Hz, 2H), 4.35 – 4.10 (m, 4H), 3.06 – 2.76 (m,  $J$  = 6.6 Hz, 1H), 1.30 (t,  $J$  = 7.3 Hz, 3H), 1.22 (t,  $J$  = 7.1 Hz, 3H), 1.11 (d,  $J$  = 6.5 Hz, 3H), 1.03 (s, 12H). **<sup>13</sup>C NMR** (126 MHz, CDCl<sub>3</sub>) δ 189.94, 167.67, 154.97, 149.54, 134.45, 129.62, 128.12, 127.44, 84.86, 83.60, 63.33, 61.62, 32.16, 27.24, 16.97, 14.53, 14.47, 14.27. **HRMS** (ESI,  $m/z$ ): calcd. for C<sub>24</sub>H<sub>32</sub>IN<sub>3</sub>O<sub>7</sub> [M+Na]<sup>+</sup> 624.1177, found 624.1182.

**Specific Rotation:** [ $\alpha$ ]<sub>D</sub><sup>25</sup> = -173.3 ( $c$  = 1.0, CHCl<sub>3</sub>). 96% ee (HPLC condition: Chiralcel AD column, *n*-Hexane/*i*-PrOH = 90:10, flow rate = 1.0 mL/min, wavelength = 254 nm,  $t_R$  = 12.172 min for minor isomer,  $t_R$  = 16.498 min for major isomer).

**diethyl (R)-1-(1-(tert-butoxycarbonyl)-2-isopropyl-3-oxo-4,5-diphenyl-2,3-dihydro-1H-pyrrol-2-yl)hydrazine-1,2-dicarboxylate (12)**

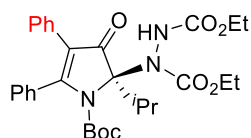

White solid, m.p. 68-70 °C, 80% yield.

**<sup>1</sup>H NMR** (500 MHz, CDCl<sub>3</sub>) δ 7.33 – 7.25 (m, 3H), 7.21 (dd,  $J$  = 7.8, 1.6 Hz, 2H), 7.19 – 7.08 (m, 3H), 7.06 (dd,  $J$  = 7.9, 1.9 Hz, 2H), 4.31 – 4.12 (m, 4H), 3.07 (p,  $J$  = 6.7 Hz, 1H), 1.33 – 1.28 (m, 3H), 1.23 (t,  $J$  = 7.1 Hz, 3H), 1.13 (d,  $J$  = 6.9 Hz, 6H), 1.03 (s, 9H). **<sup>13</sup>C NMR** (126 MHz, CDCl<sub>3</sub>) δ 192.47, 162.04, 156.34, 155.18, 150.56, 129.91, 129.43, 128.95, 128.00, 127.87, 127.72, 126.88, 85.28, 82.89, 63.11, 61.53, 31.46, 27.30, 22.50, 17.37, 14.64, 14.28. **HRMS** (ESI,  $m/z$ ): calcd. for C<sub>30</sub>H<sub>37</sub>N<sub>3</sub>O<sub>7</sub> [M+Na]<sup>+</sup> 574.2524, found 574.2527.

**Specific Rotation:** [ $\alpha$ ]<sub>D</sub><sup>25</sup> = -267.3 ( $c$  = 1.0, CHCl<sub>3</sub>). 96% ee (HPLC condition: Chiralcel AD column, *n*-Hexane/*i*-PrOH = 90:10, flow rate = 1.0 mL/min, wavelength = 254 nm,  $t_R$  = 10.018

min for minor isomer,  $t_R = 11.532$  min for major isomer).

**diethyl (R)-1-(1-(tert-butoxycarbonyl)-4-ethynyl-2-isopropyl-3-oxo-5-phenyl-2,3-dihydro-1H-pyrrol-2-yl)hydrazine-1,2-dicarboxylate (13)**

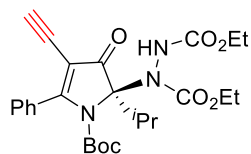

Yellow solid, m.p. 88-90 °C, 75% yield.

**$^1\text{H NMR}$**  (500 MHz,  $\text{CDCl}_3$ )  $\delta$  7.50 – 7.38 (m, 5H), 4.28 – 4.13 (m, 4H), 3.09 (s, 1H), 2.99 (p,  $J = 6.8$  Hz, 1H), 1.52 (s, 1H), 1.33 – 1.29 (m, 3H), 1.21 (t,  $J = 7.1$  Hz, 3H), 1.12 (d,  $J = 6.7$  Hz, 3H), 1.09 – 1.00 (m, 12H).  **$^{13}\text{C NMR}$**  (126 MHz,  $\text{CDCl}_3$ )  $\delta$  190.85, 168.51, 154.95, 149.85, 129.96, 128.97, 127.91, 127.28, 106.41, 86.01, 84.35, 83.75, 83.47, 63.38, 61.66, 32.56, 27.21, 16.99, 14.61, 14.44, 14.07. **HRMS** (ESI,  $m/z$ ): calcd. for  $\text{C}_{26}\text{H}_{33}\text{N}_3\text{O}_7$   $[\text{M}+\text{Na}]^+$  522.2211, found 522.2217.

**Specific Rotation:**  $[\alpha]_D^{25} = -44.2$  ( $c = 1.0$ ,  $\text{CHCl}_3$ ). 96% ee (HPLC condition: Chiralcel AD column,  $n$ -Hexane/ $i$ -PrOH = 90:10, flow rate = 1.0 mL/min, wavelength = 254 nm,  $t_R = 12.568$  min for minor isomer,  $t_R = 16.138$  min for major isomer).

**diisopropyl (R)-1-(4-bromo-1-(tert-butoxycarbonyl)-2-isopropyl-3-oxo-5-phenyl-2,3-dihydro-1H-pyrrol-2-yl)-2-(2-(ethoxycarbonyl)allyl)hydrazine-1,2-dicarboxylate (14)**

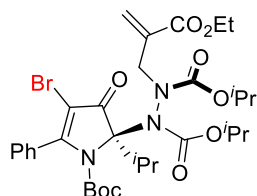

White solid, m.p. 64-66 °C, 88% yield.

**$^1\text{H NMR}$**  (500 MHz,  $\text{CDCl}_3$ )  $\delta$  7.43 (d,  $J = 5.2$  Hz, 3H), 7.39 – 7.31 (m, 2H), 6.30 (s, 1H), 5.67 (s, 1H), 4.97 (dq,  $J = 19.8, 6.1$  Hz, 2H), 4.78 – 4.50 (m, 1H), 4.29 – 4.15 (m, 3H), 3.43 – 2.98 (m, 1H), 1.39 – 1.21 (m, 15H), 1.14 (d,  $J = 6.6$  Hz, 3H), 1.00 (d,  $J = 16.9$  Hz, 12H).  **$^{13}\text{C NMR}$**  (126 MHz,  $\text{CDCl}_3$ )  $\delta$  189.16, 166.15, 153.16, 148.45, 137.67, 133.15, 129.50, 127.99, 127.41, 123.61, 82.77, 71.00, 60.24, 55.67, 31.09, 27.23, 21.88, 21.76, 17.63, 15.88, 14.09. **HRMS** (ESI,  $m/z$ ): calcd. for  $\text{C}_{32}\text{H}_{44}\text{BrN}_3\text{O}_9$   $[\text{M}+\text{H}]^+$  694.2334, found 694.2338.

**Specific Rotation:**  $[\alpha]_D^{25} = -394.4$  ( $c = 1.0$ ,  $\text{CHCl}_3$ ). 97% ee (HPLC condition: Chiralcel IB-3

column, *n*-Hexane/*i*-PrOH = 90:10, flow rate = 1.0 mL/min, wavelength = 254 nm,  $t_R$  = 3.858 min for major isomer,  $t_R$  = 4.705 min for minor isomer).

**(*R,R*)-2-((2-(1-(tert-butoxycarbonyl)-2-isopropyl-3-oxo-5-phenyl-2,3-dihydro-1H-pyrrol-2-yl)-1,2-bis(isopropoxycarbonyl)hydrazineyl)methyl)acrylic acid (15)**

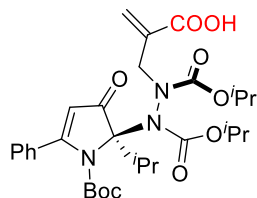

White solid, m.p. 73-75 °C, 84% yield.

$^1\text{H NMR}$  (500 MHz,  $\text{CDCl}_3$ )  $\delta$  9.72 (s, 1H), 7.36 – 7.23 (m, 5H), 6.34 (s, 1H), 5.76 (s, 1H), 5.39 (s, 1H), 4.87 (ddq,  $J$  = 30.4, 13.1, 6.7 Hz, 2H), 4.61 (s, 1H), 4.22 (d,  $J$  = 17.2 Hz, 1H), 3.17-3.08 (m, 1H), 1.17 (td,  $J$  = 15.0, 13.6, 6.8 Hz, 12H), 1.10 – 0.90 (m, 15H).  $^{13}\text{C NMR}$  (126 MHz,  $\text{CDCl}_3$ )  $\delta$  194.39, 170.88, 153.45, 148.91, 137.00, 134.39, 129.37, 127.91, 126.61, 110.24, 82.53, 70.94, 54.86, 31.32, 27.34, 21.88, 21.65, 17.67, 16.01. **HRMS** (ESI,  $m/z$ ): calcd. for  $\text{C}_{30}\text{H}_{41}\text{N}_3\text{O}_9$   $[\text{M}+\text{Na}]^+$  610.2735, found 610.273.

**Specific Rotation:**  $[\alpha]_D^{25} = -123.5$  ( $c$  = 1.0,  $\text{CHCl}_3$ ). 99% ee (HPLC condition: Chiralcel AD column, *n*-Hexane/*i*-PrOH = 90:10, flow rate = 1.0 mL/min, wavelength = 254 nm,  $t_R$  = 11.763 min for minor isomer,  $t_R$  = 21.272 min for major isomer).

## 10. X-ray Crystallographic

### Data X-ray Crystallographic Data of Compound 3b

---

|                        |                                                               |                                                                       |                                 |
|------------------------|---------------------------------------------------------------|-----------------------------------------------------------------------|---------------------------------|
| Bond precision:        | C-C = 0.0074 Å                                                | Wavelength=1.34139                                                    |                                 |
| Cell:                  | a=10.4813(16)<br>alpha=97.915(6)                              | b=10.5048(16)<br>beta=92.615(6)                                       | c=13.991(2)<br>gamma=118.101(6) |
| Temperature:           | 298 K                                                         |                                                                       |                                 |
|                        | Calculated                                                    | Reported                                                              |                                 |
| Volume Space           | 1335.1(4)                                                     | 1335.2(4)                                                             |                                 |
| group Hall             | P 1                                                           | P 1                                                                   |                                 |
| group                  | P 1                                                           | P 1                                                                   |                                 |
| Moiety formula         | P 1                                                           | P 1                                                                   |                                 |
| Sum formula            | C <sub>24</sub> H <sub>32</sub> N <sub>3</sub> O <sub>7</sub> | 0.074(C <sub>24</sub> H <sub>32</sub> N <sub>3</sub> O <sub>7</sub> ) |                                 |
| Mr                     | C <sub>24</sub> H <sub>32</sub> N <sub>3</sub> O <sub>7</sub> | C1.78 H2.37 N0.22 O0.52                                               |                                 |
| Dx, g cm <sup>-3</sup> | 474.53                                                        | 35.15                                                                 |                                 |
| Z                      | 1.180                                                         | 1.180                                                                 |                                 |
| Mu (mm <sup>-1</sup> ) | 2                                                             | 27                                                                    |                                 |
| F000                   | 0.460                                                         | 0.460                                                                 |                                 |
| F000'                  | 506.0                                                         | 506.0                                                                 |                                 |
| h,k,lmax               | 507.26                                                        |                                                                       |                                 |
| Nref                   | 14,14,18                                                      | 14,14,18                                                              |                                 |
| Tmin,Tmax              | 13830[ 6915]                                                  | 12815                                                                 |                                 |
| Tmin'                  | 0.659,0.753                                                   | 0.659,0.753                                                           |                                 |

Correction method= # Reported T Limits: Tmin=0.659 Tmax=0.753 AbsCorr = NONE

Data completeness= 1.85/0.93

Theta(max)= 65.108

R(reflections)=0.0555(8481)

wR2(reflections)=

0.1707( 12815)

S = 1.009

Npar= 623

---





## Data X-ray Crystallographic Data of Compound 6t

---

|                                                                                       |                   |                    |                |
|---------------------------------------------------------------------------------------|-------------------|--------------------|----------------|
| Bond precision:                                                                       | C-C = 0.0029 Å    | Wavelength=1.54184 |                |
| Cell:                                                                                 | a=15.78147(11)    | b=14.09396(13)     | c=16.78114(12) |
|                                                                                       | alpha=90          | beta=98.9652(7)    | gamma=90       |
| Temperature:                                                                          | 301 K             |                    |                |
|                                                                                       | Calculated        | Reported           |                |
| Volume Space                                                                          | 3686.92(5)        | 3686.92(5)         |                |
| group Hall                                                                            | P 21/c            | P 1 21/c 1         |                |
| group                                                                                 | -P 2ybc C36       | -P 2ybc            |                |
| Moiety formula                                                                        | H42 N4 O11        | C36 H42 N4 O11     |                |
| Sum formula                                                                           | C36 H42 N4 O11    | C36 H42 N4 O11     |                |
| Mr                                                                                    | 706.74            | 706.73             |                |
| Dx, g cm <sup>-3</sup>                                                                | 1.273             | 1.273              |                |
| Z                                                                                     | 4                 | 4                  |                |
| Mu (mm <sup>-1</sup> )                                                                | 0.792             | 0.792              |                |
| F000                                                                                  | 1496.0            | 1496.0             |                |
| F000'                                                                                 | 1501.04           |                    |                |
| h,k,lmax                                                                              | 19,17,21          | 19,17,20           |                |
| Nref                                                                                  | 7736              | 7355               |                |
| Tmin,Tmax                                                                             | 0.945,0.969       | 0.697,1.000        |                |
| Tmin'                                                                                 | 0.939             |                    |                |
| Correction method= # Reported T Limits: Tmin=0.697 Tmax=1.000 AbsCorr =<br>MULTI-SCAN |                   |                    |                |
| Data completeness= 0.951                                                              |                   | Theta(max)= 76.415 |                |
| R(reflections)= 0.0489( 6676)                                                         | wR2(reflections)= | 0.1379( 7355)      |                |
| S = 1.059                                                                             | Npar= 476         |                    |                |

---

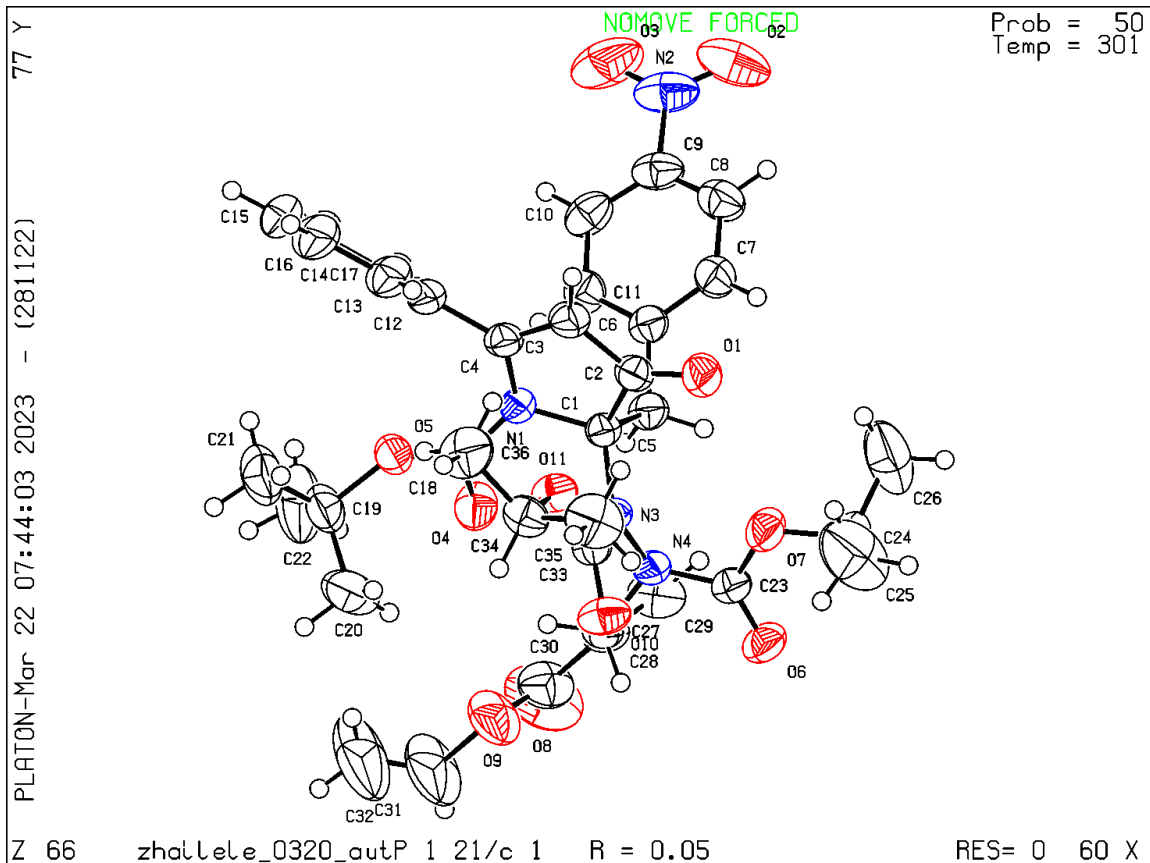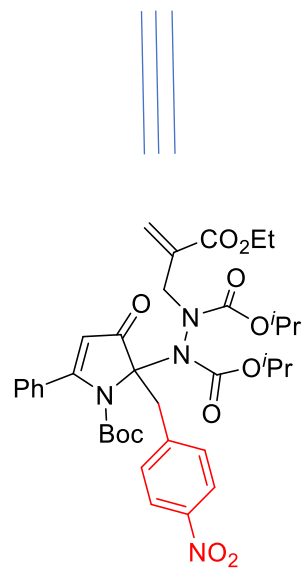

# 11. $^1\text{H}$ NMR, $^{13}\text{C}$ NMR, $^{19}\text{F}$ NMR and HPLC spectra.

## *tert*-butyl (2-methyl-4-oxo-6-(*p*-tolyl)hex-5-yn-3-yl)carbamate (1d)

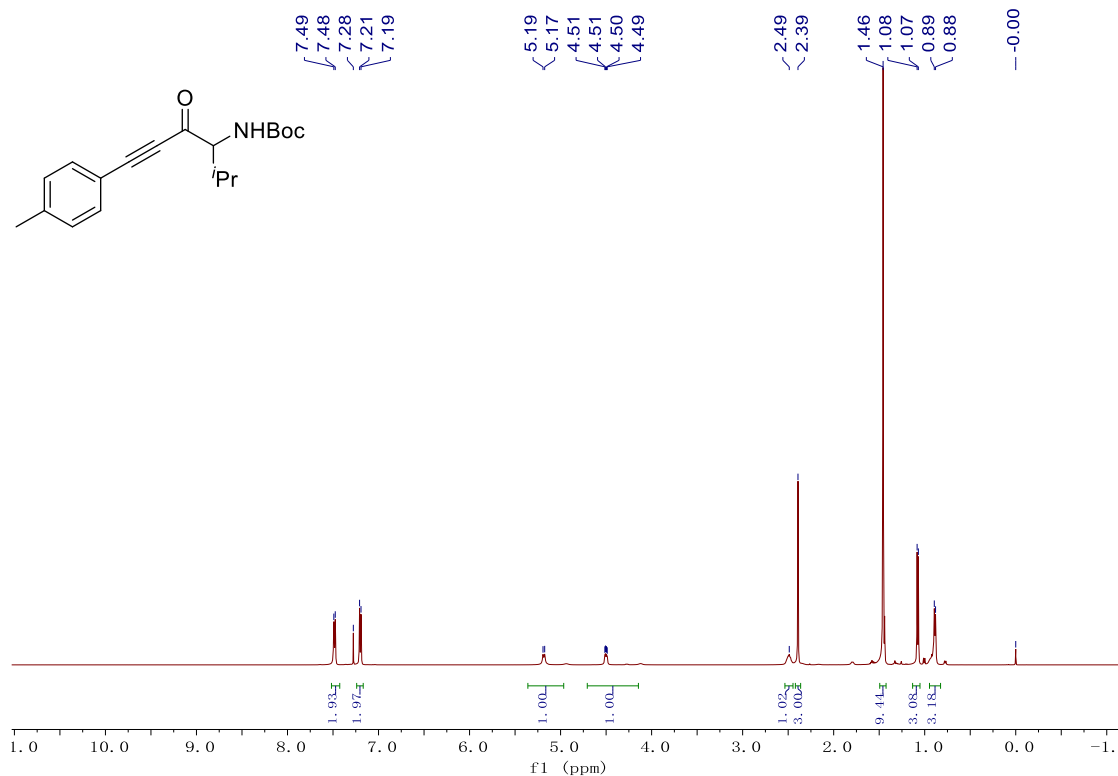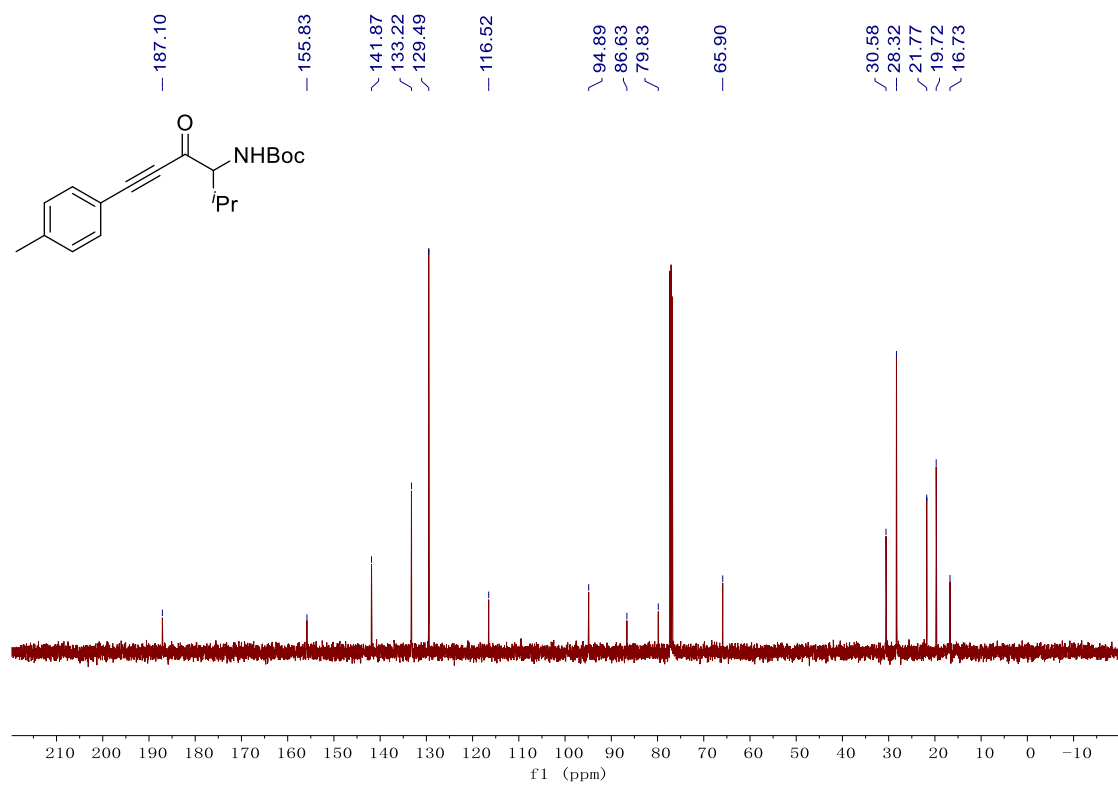

***tert*-butyl (6-(4-methoxyphenyl)-2-methyl-4-oxohex-5-yn-3-yl)carbamate (1e)**

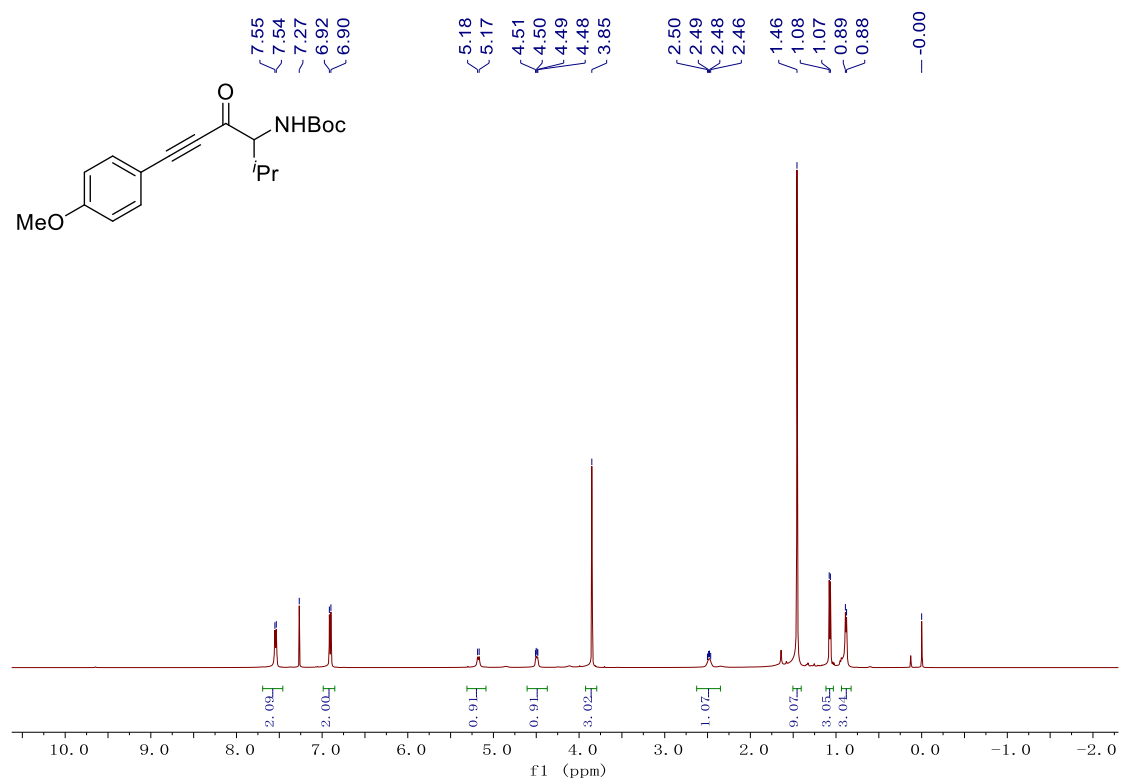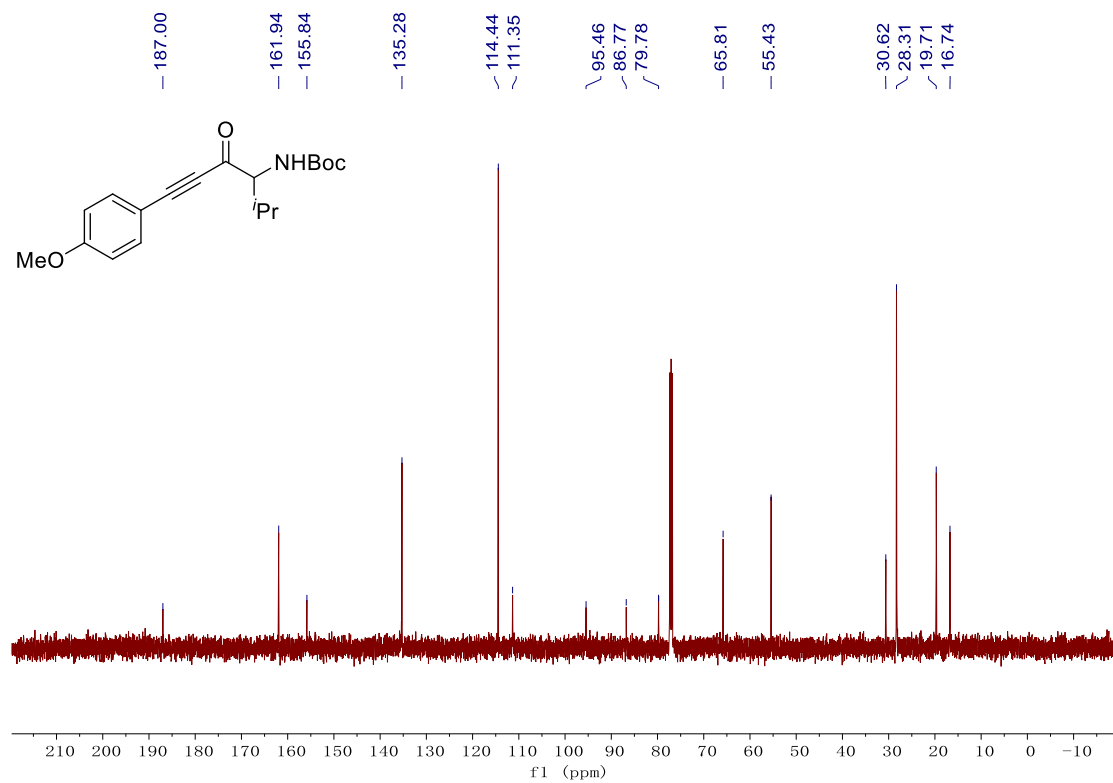

***tert*-butyl (6-(4-fluorophenyl)-2-methyl-4-oxohex-5-yn-3-yl)carbamate (1f)**

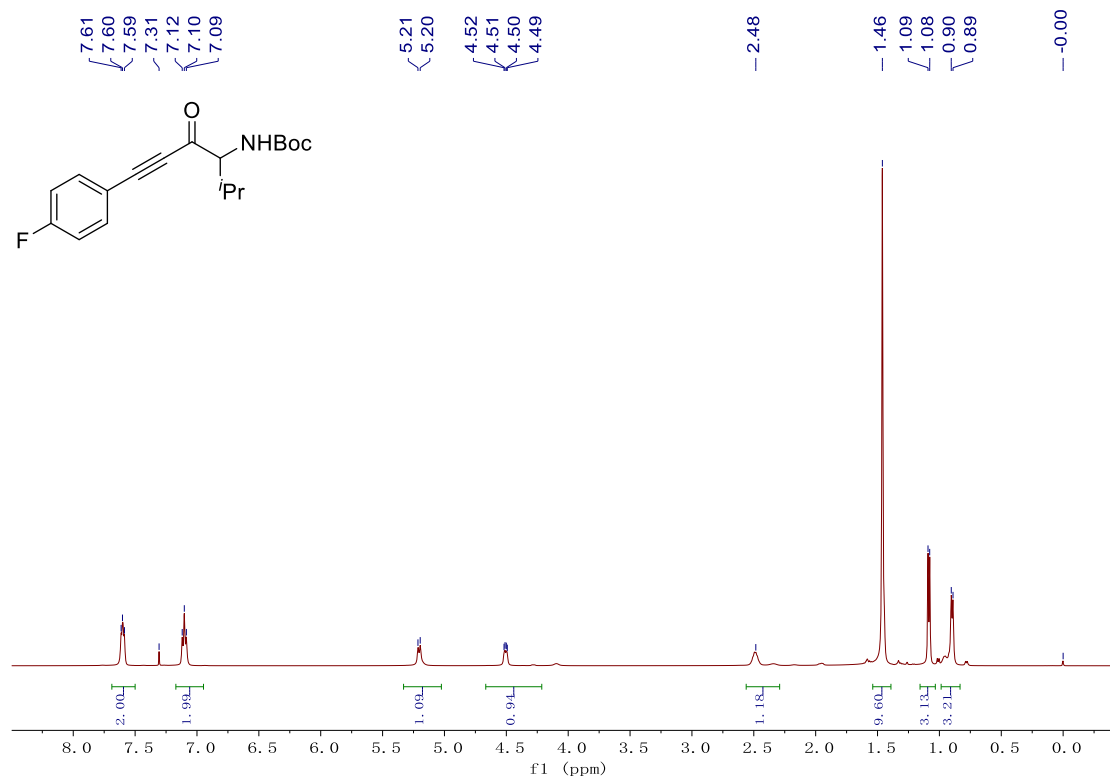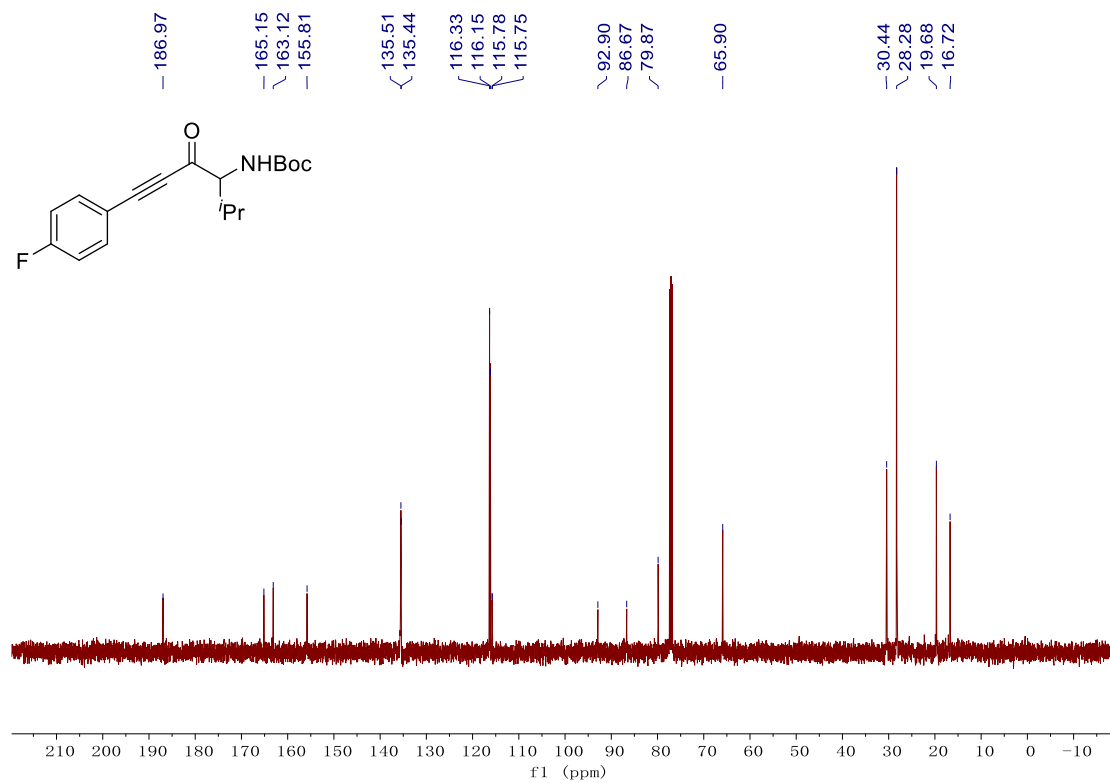

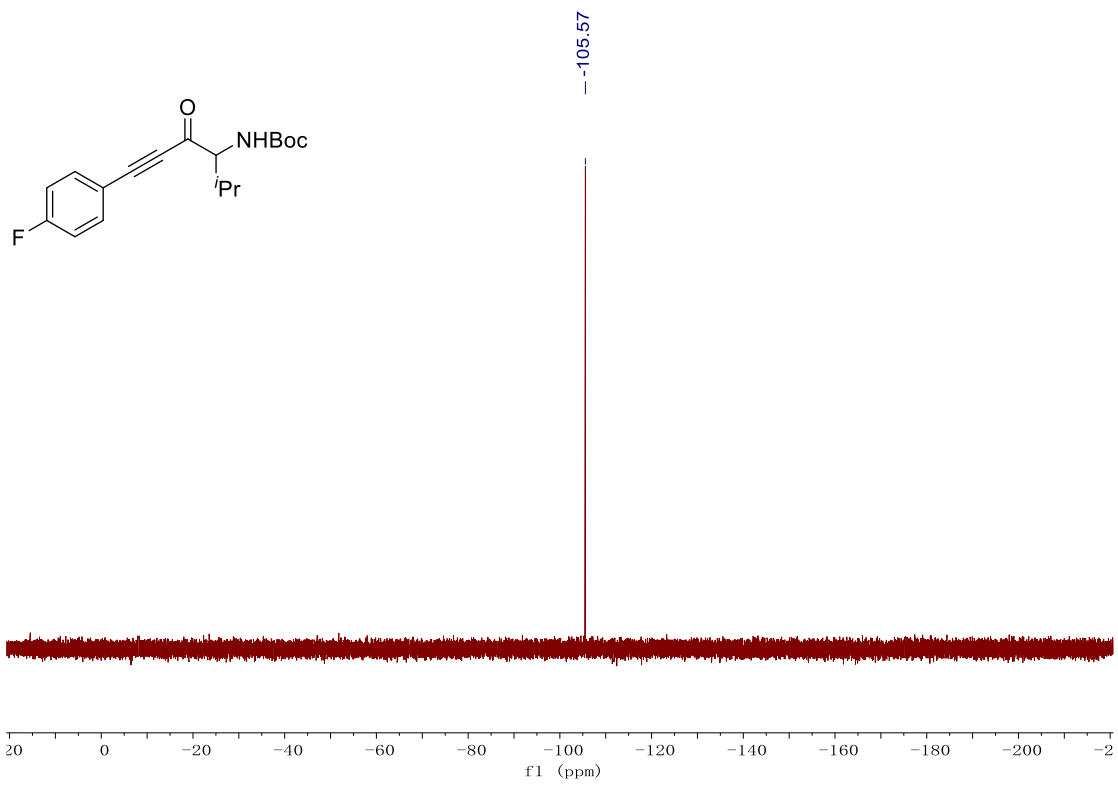

**tert-butyl (2-methyl-4-oxo-6-(m-tolyl)hex-5-yn-3-yl)carbamate (1g)**

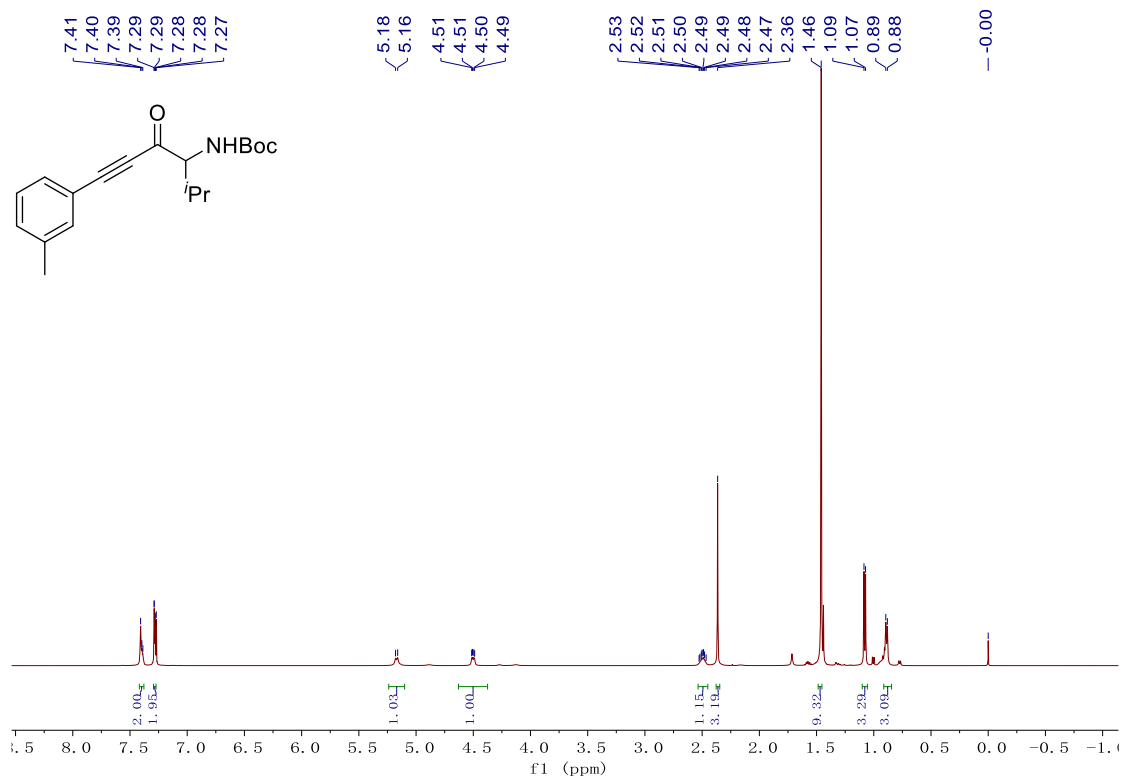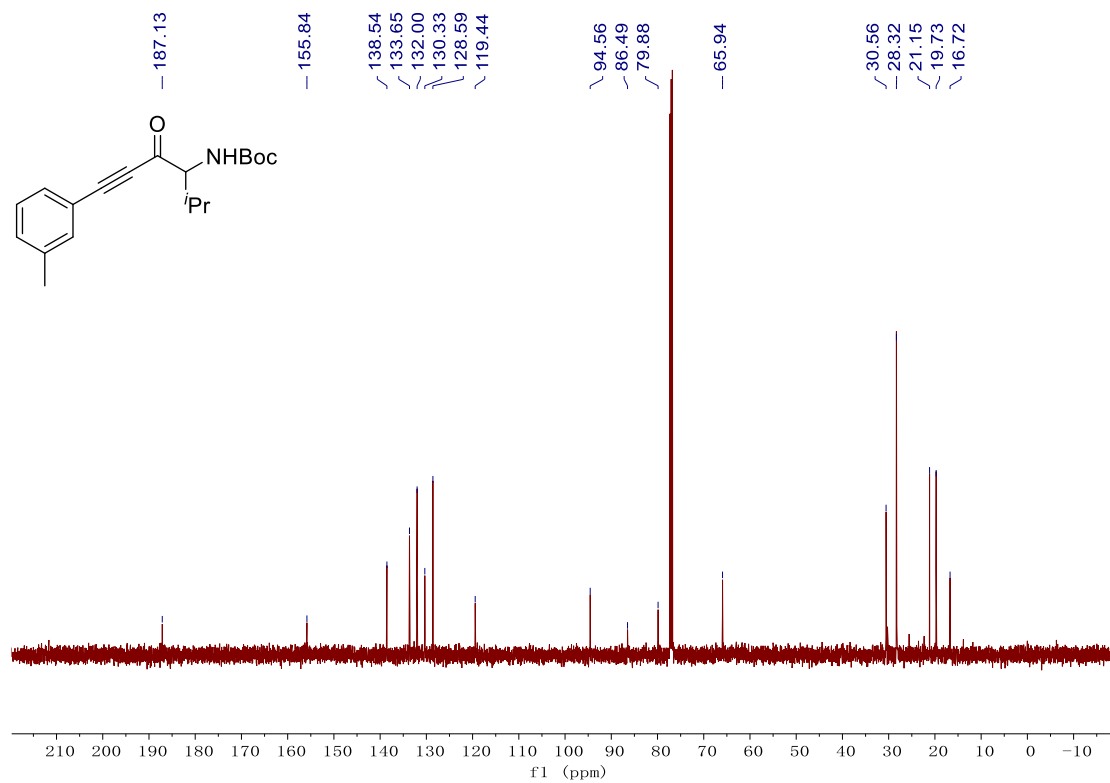

***tert*-butyl (6-(3-chlorophenyl)-2-methyl-4-oxohex-5-yn-3-yl)carbamate (1h)**

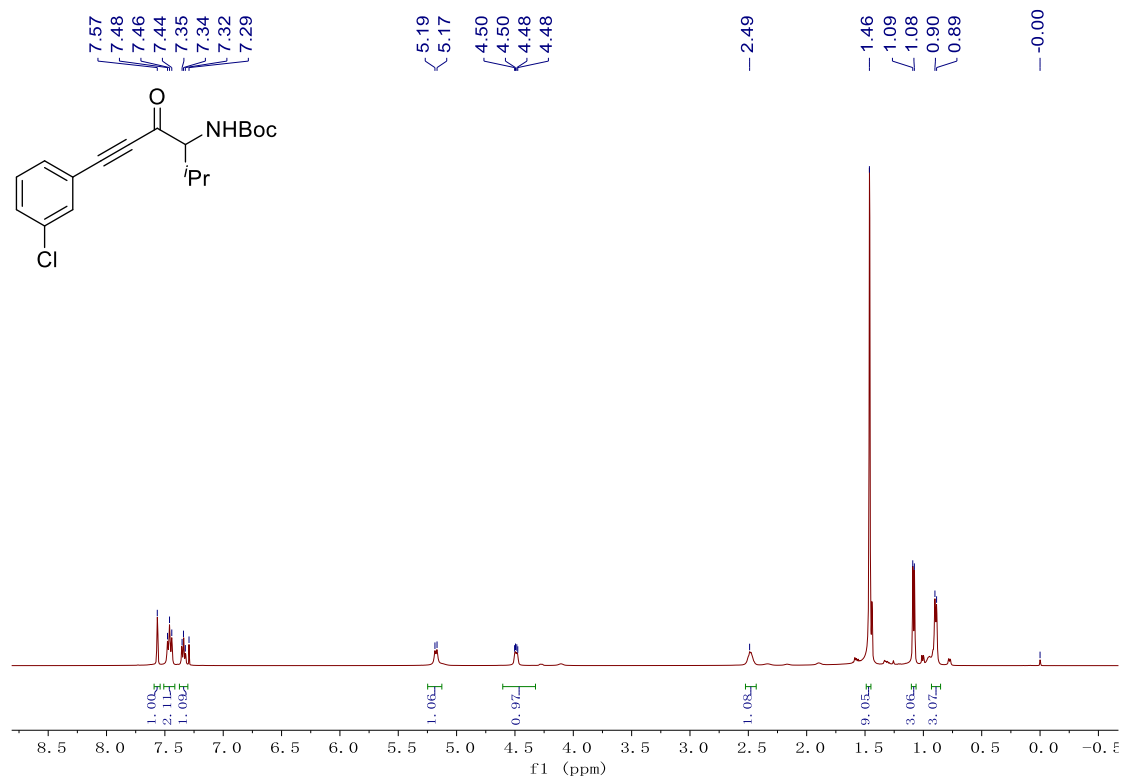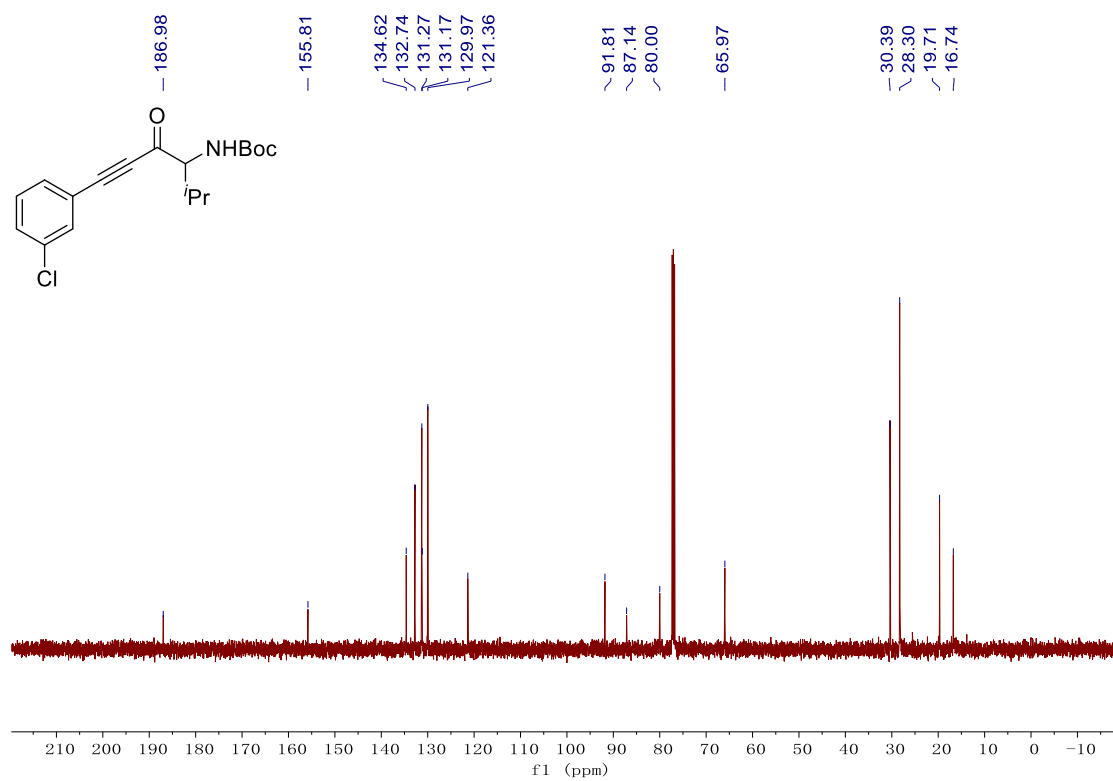



**tert-butyl (2-methyl-4-oxo-6-(o-tolyl)hex-5-yn-3-yl)carbamate (1i)**

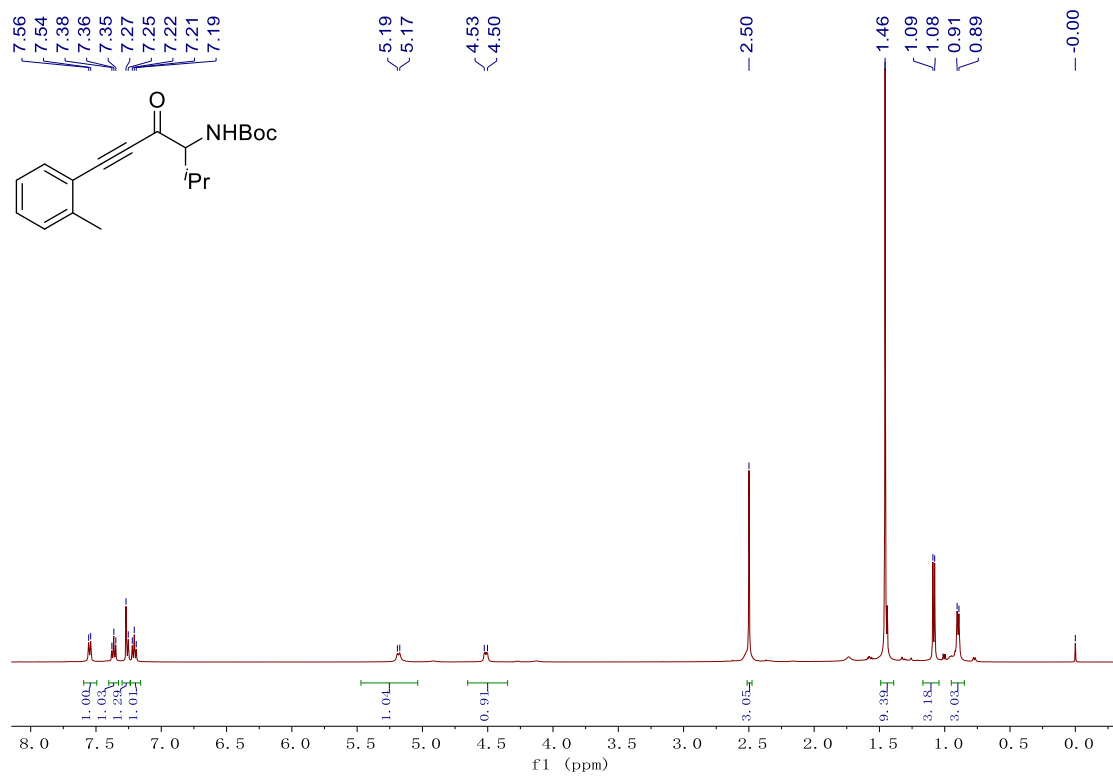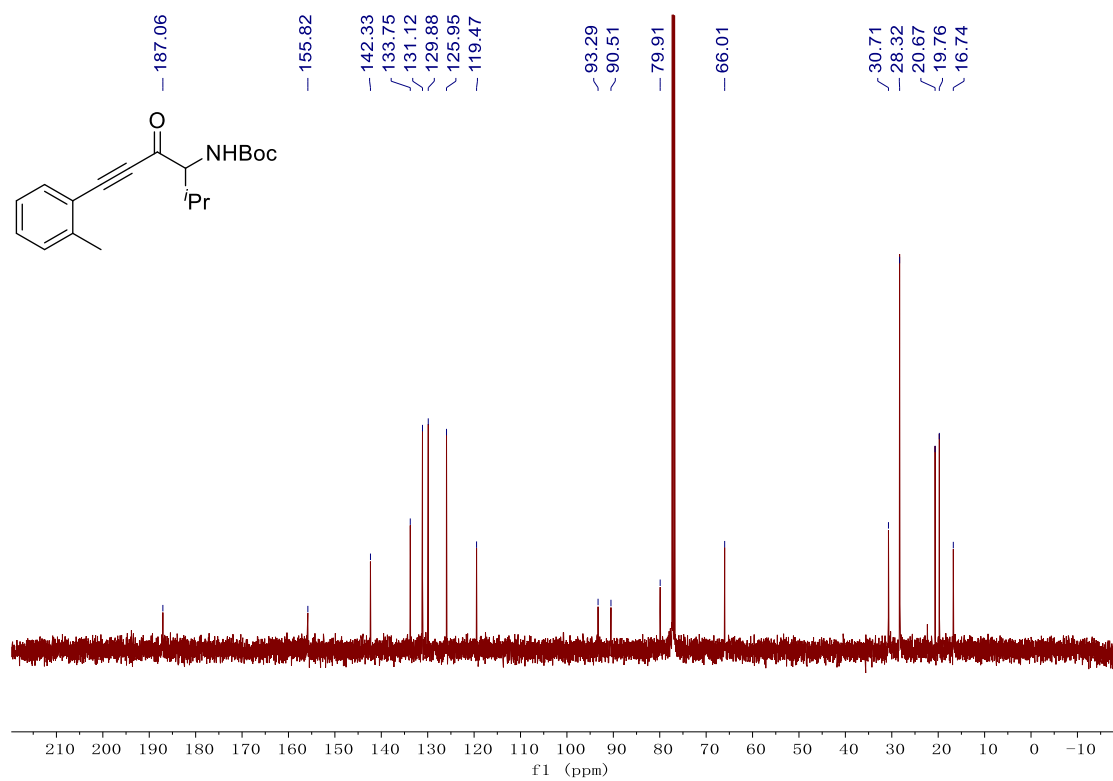

***tert*-butyl (3-oxo-5-phenylpent-4-yn-2-yl)carbamate (1j)**

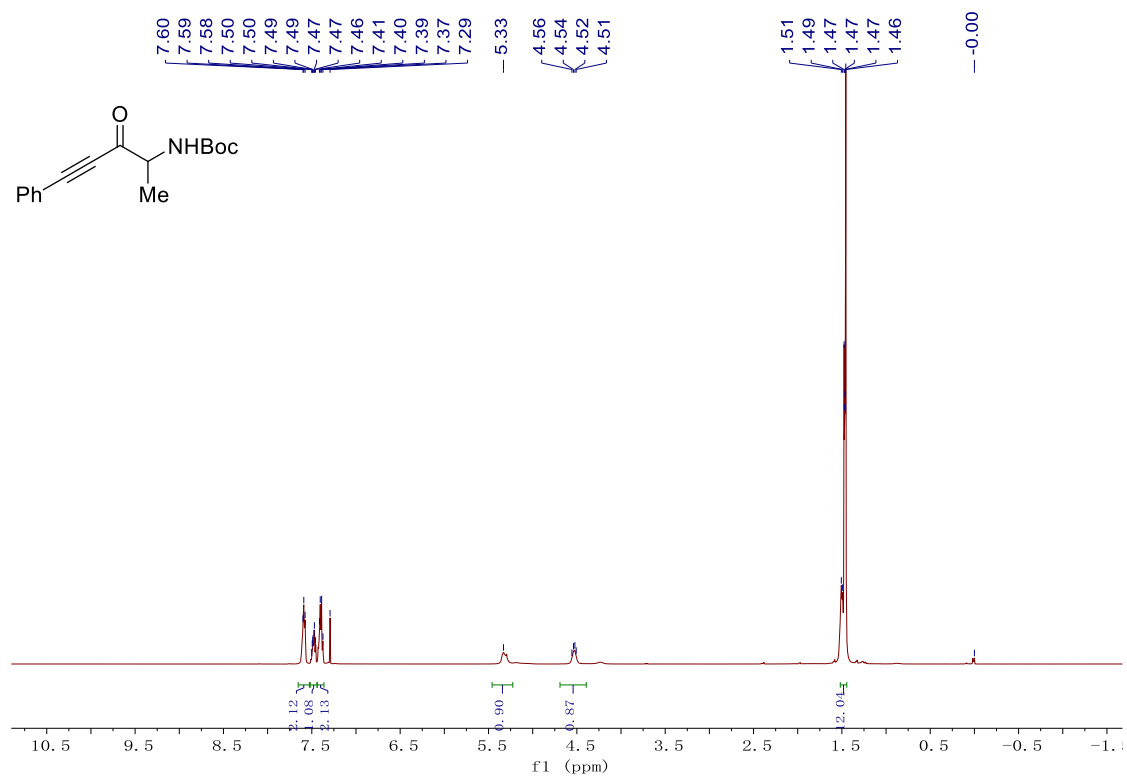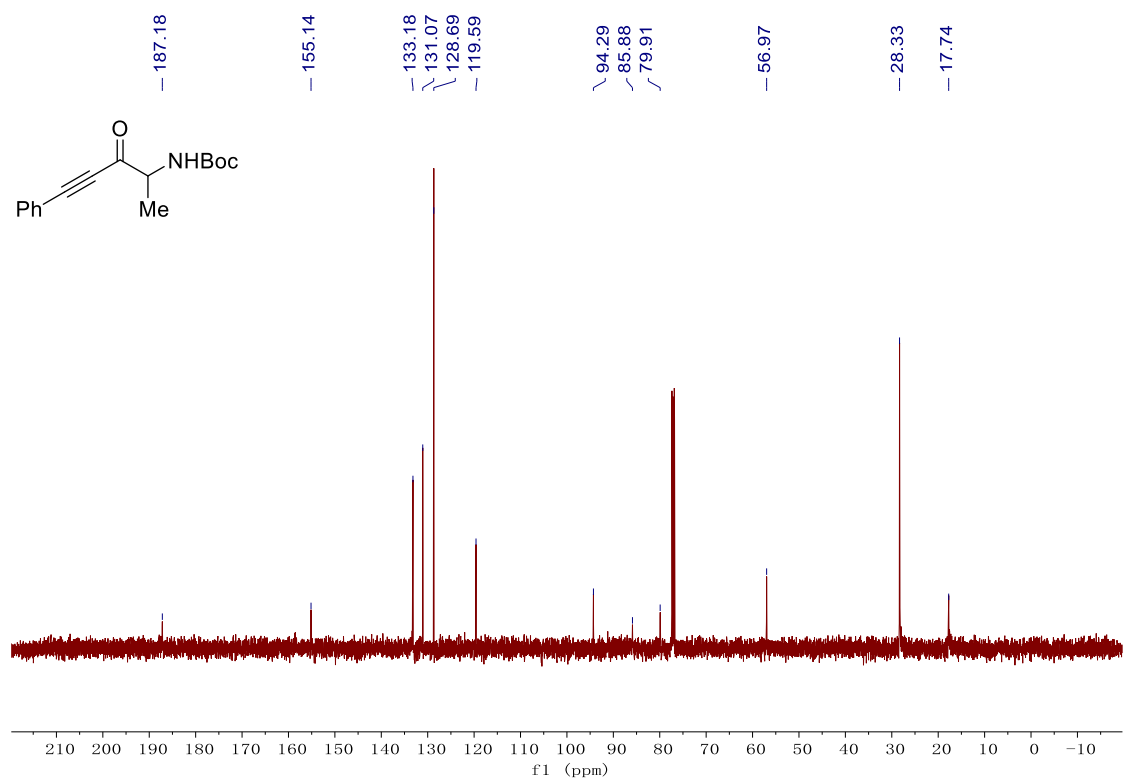

***tert*-butyl (3-oxo-1,5-diphenylpent-4-yn-2-yl)carbamate (1k)**

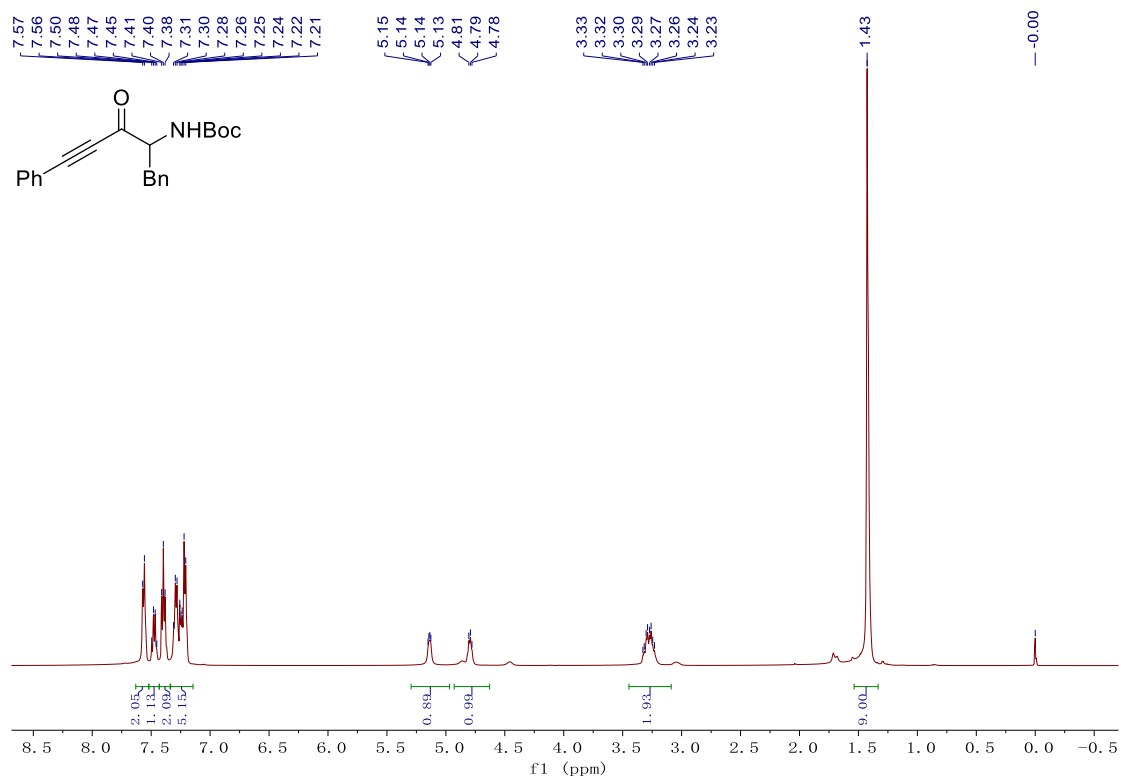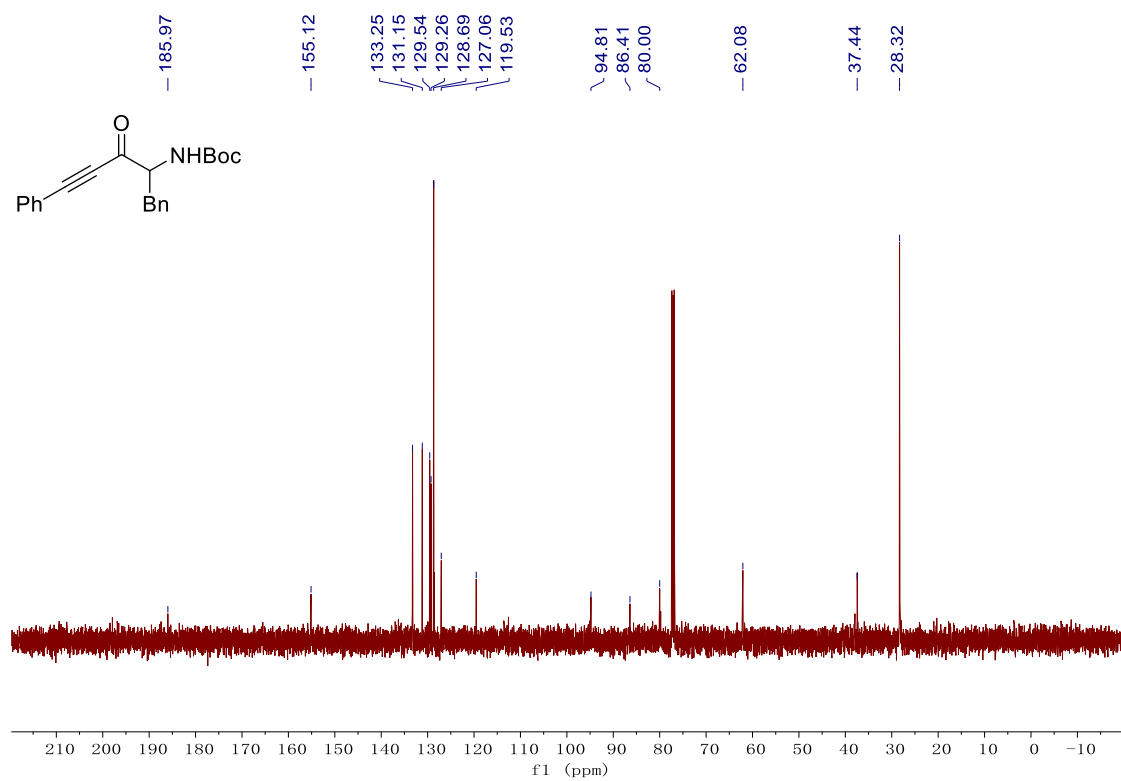

***tert*-butyl (1-(4-nitrophenyl)-3-oxo-5-phenylpent-4-yn-2-yl)carbamate (11)**

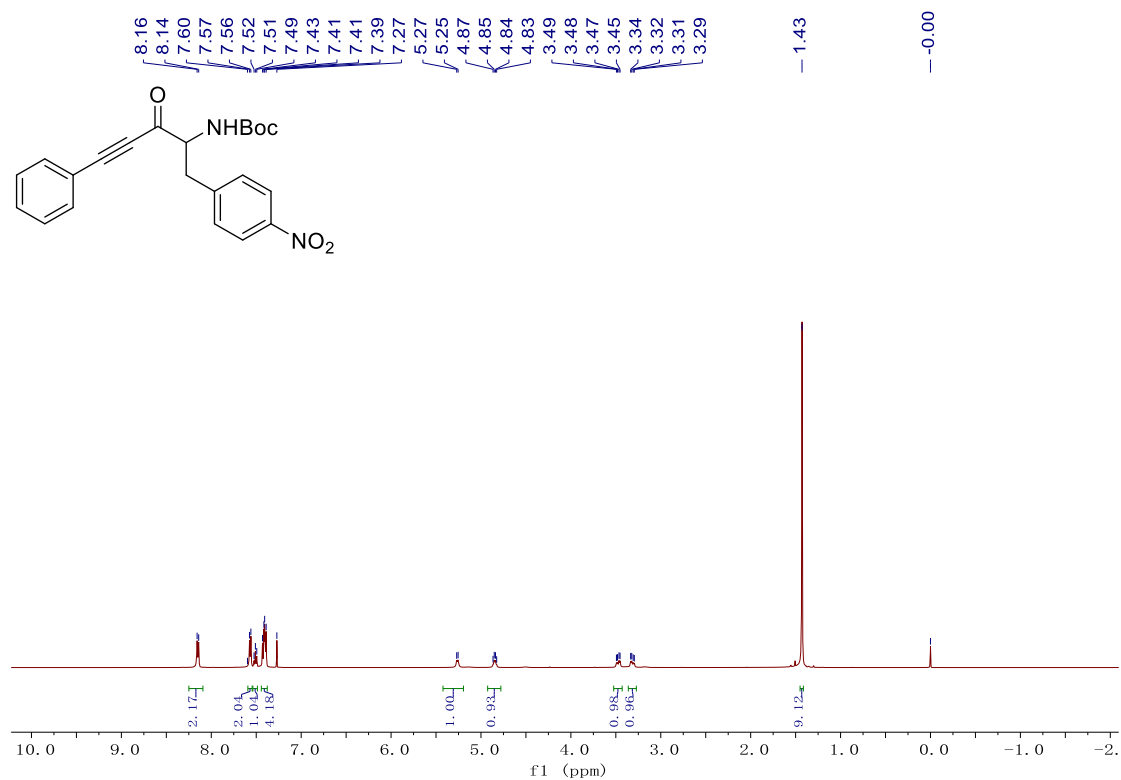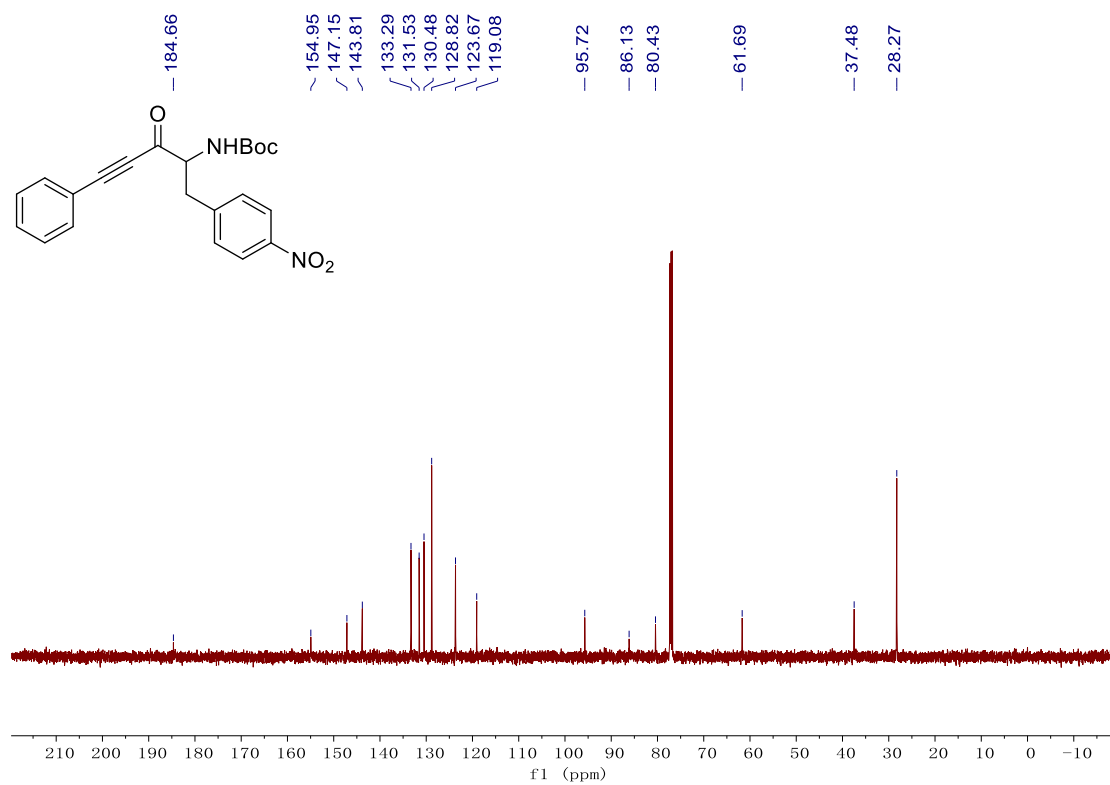

***tert*-butyl (2,2-dimethyl-4-oxo-6-phenylhex-5-yn-3-yl)carbamate (1m)**

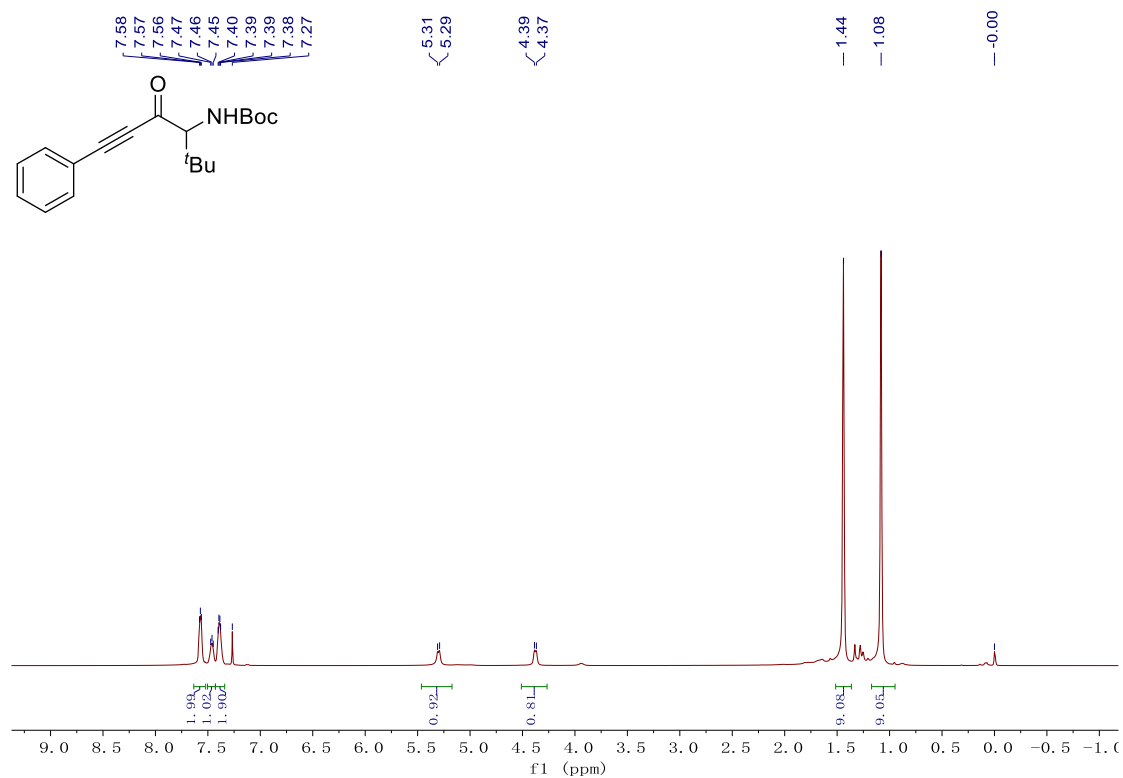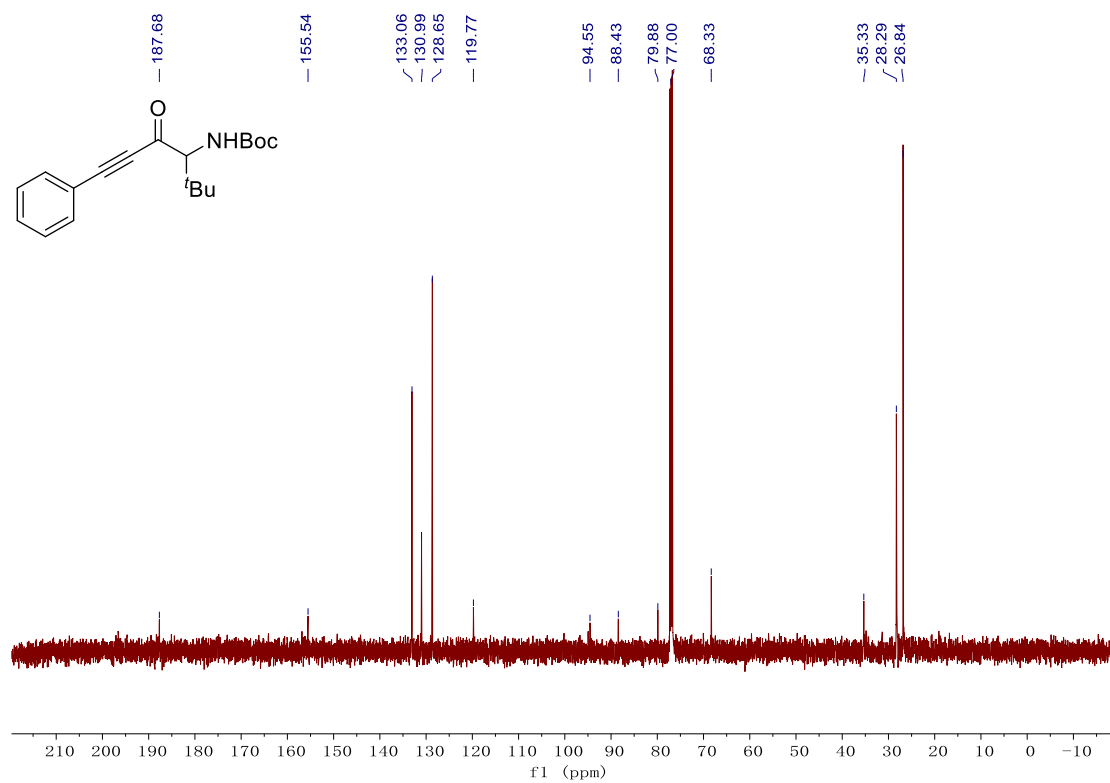

***tert*-butyl (6-(4-ethylphenyl)-2-methyl-4-oxohex-5-yn-3-yl)carbamate (1n)**

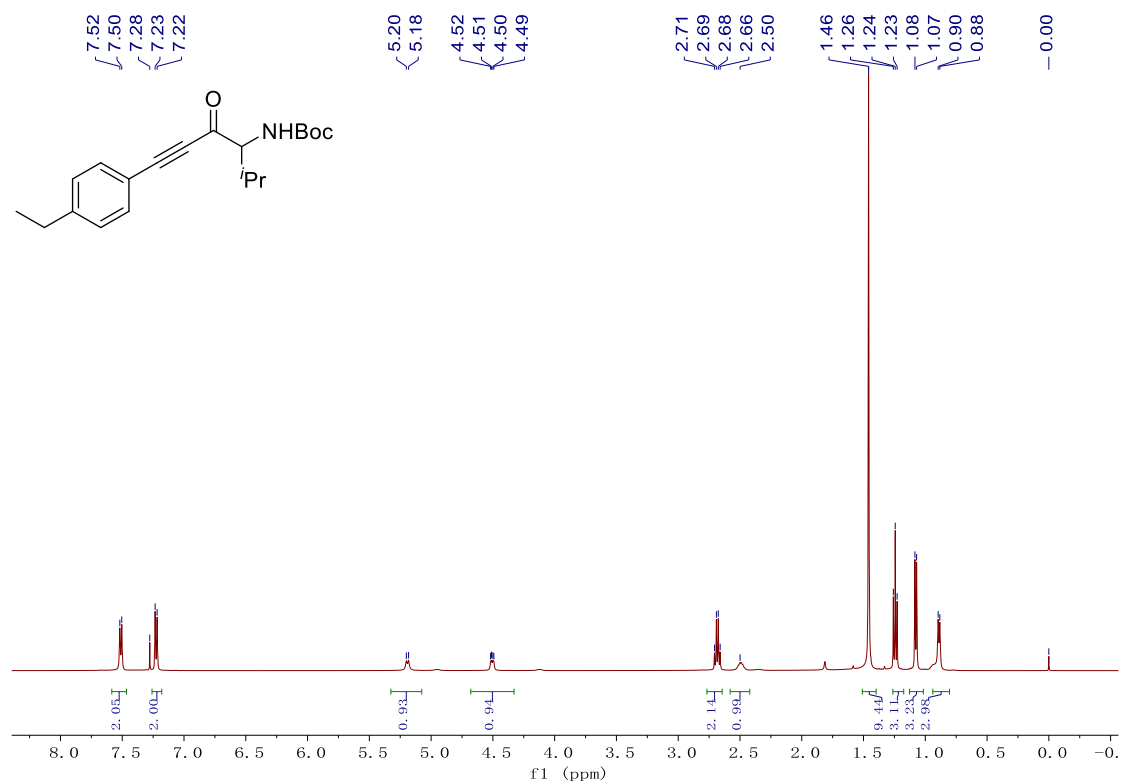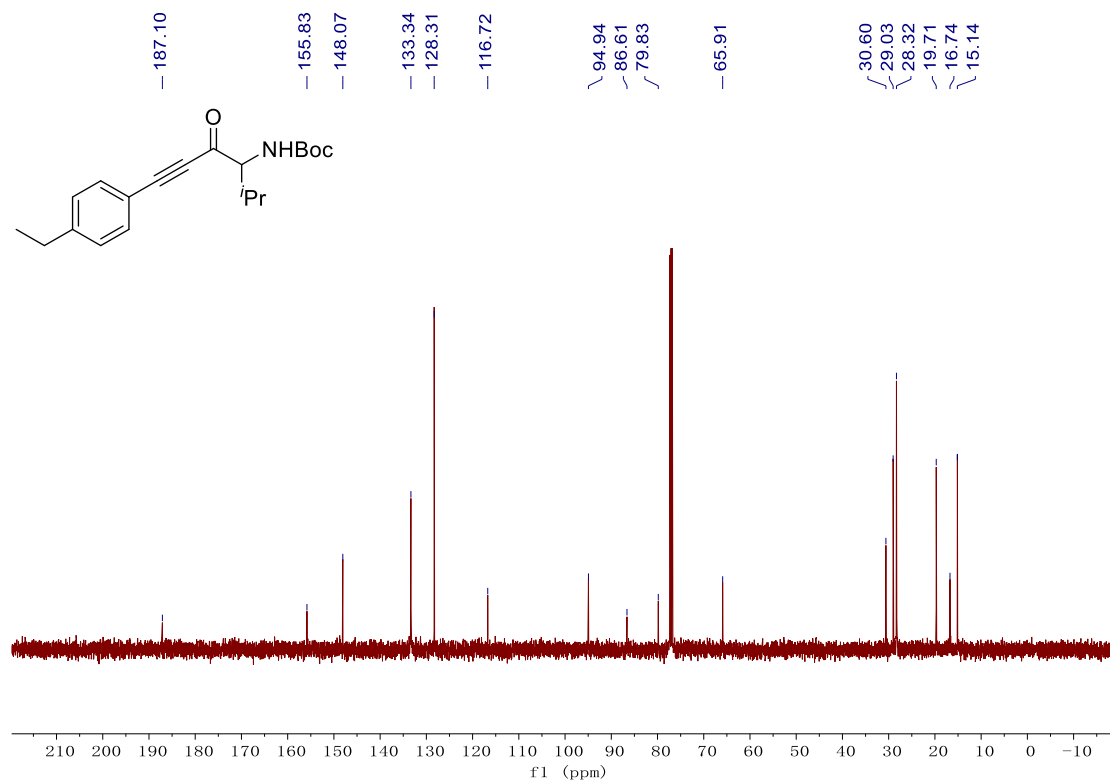

***tert*-butyl (6-(4-butylphenyl)-2-methyl-4-oxohex-5-yn-3-yl)carbamate (1o)**

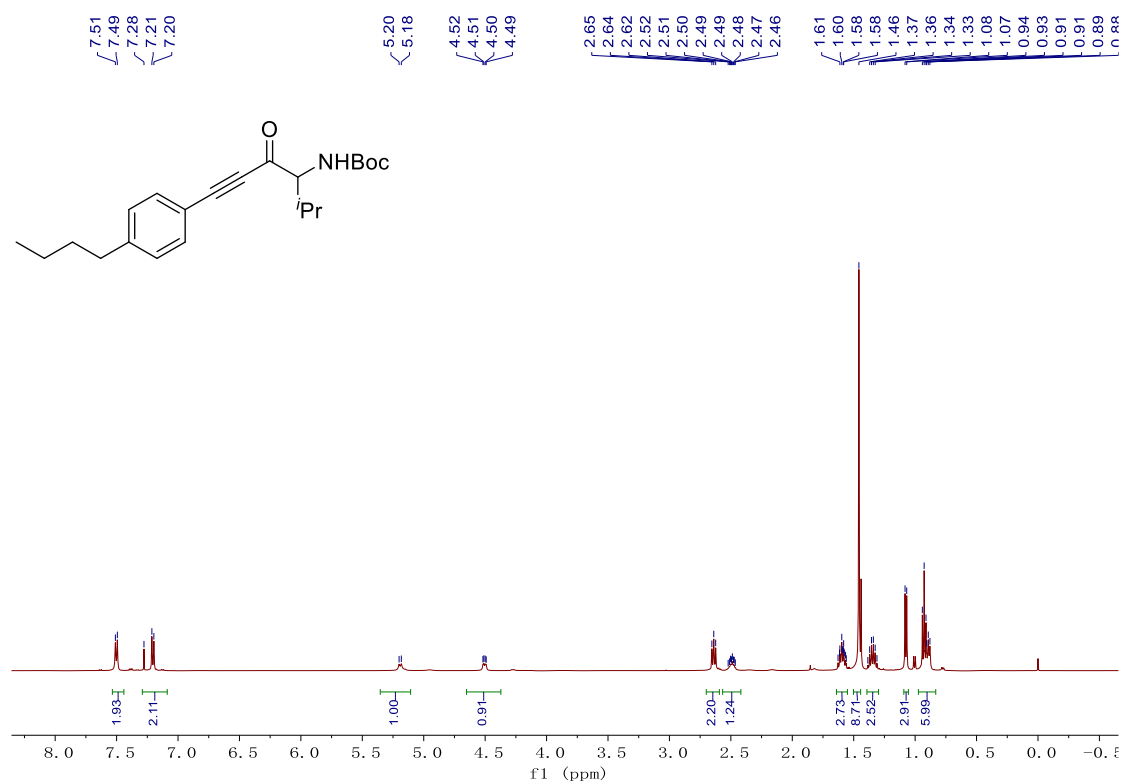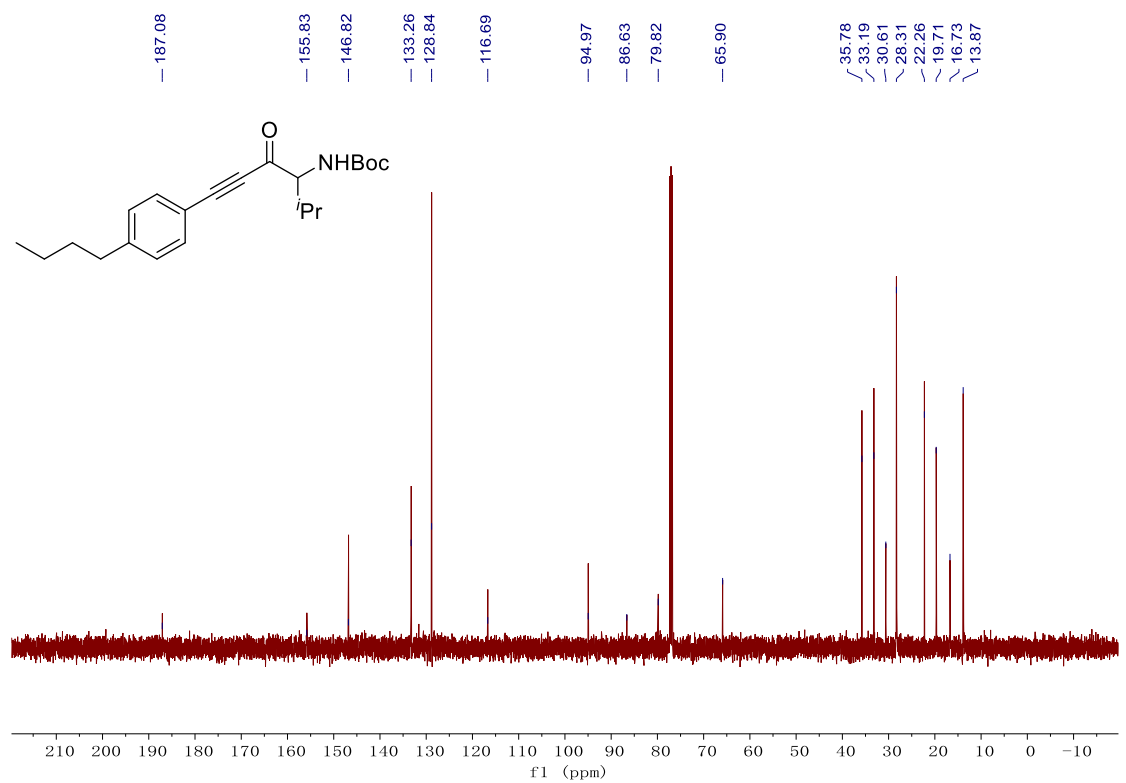

***tert*-butyl (6-(4-(*tert*-butyl)phenyl)-2-methyl-4-oxohex-5-yn-3-yl)carbamate (1p)**

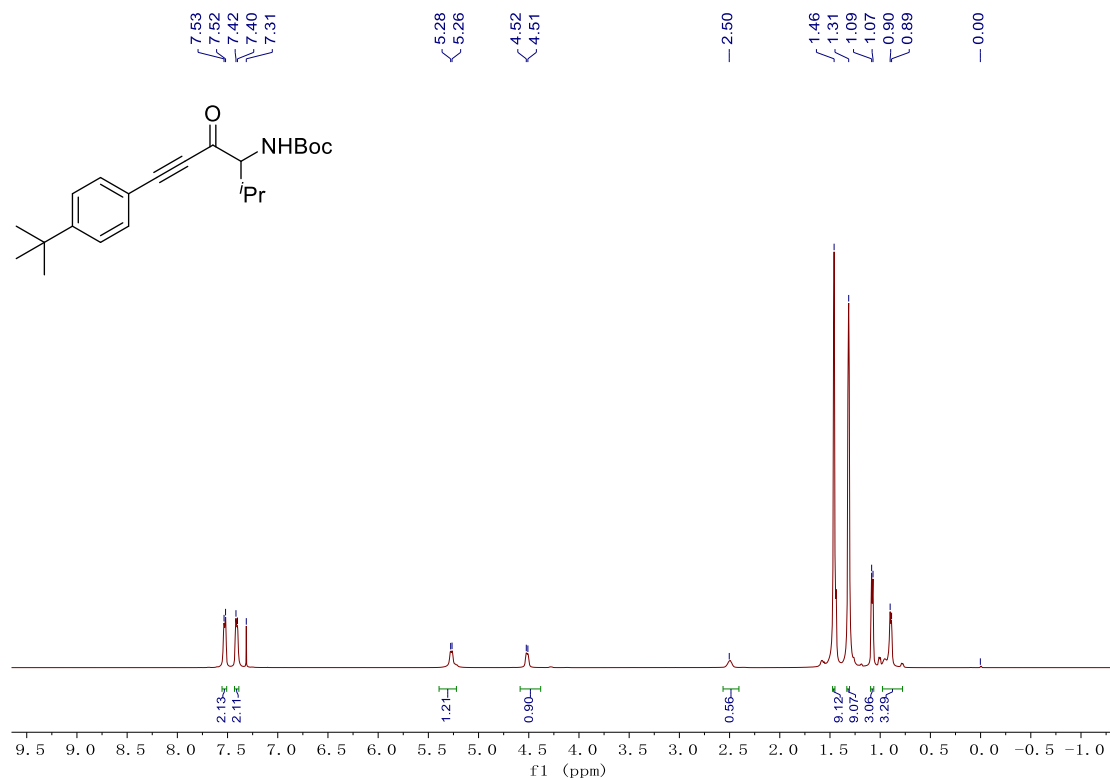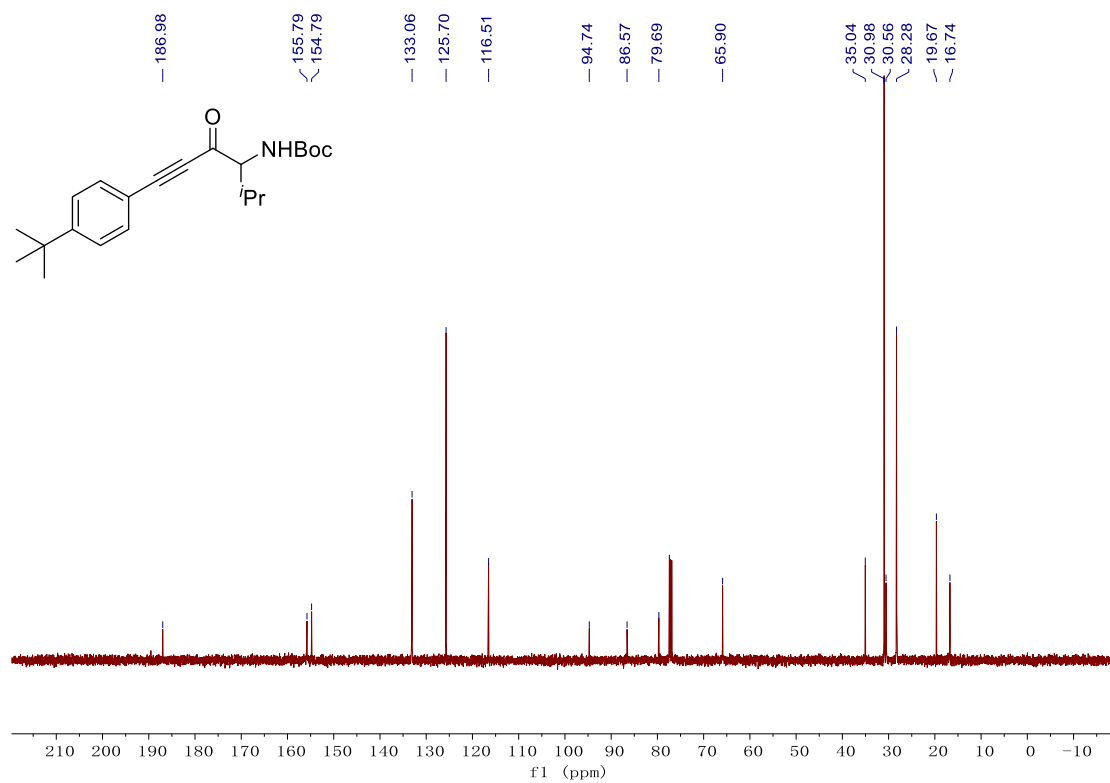



***tert*-butyl (6-([1,1'-biphenyl]-4-yl)-2-methyl-4-oxohex-5-yn-3-yl)carbamate (1q)**

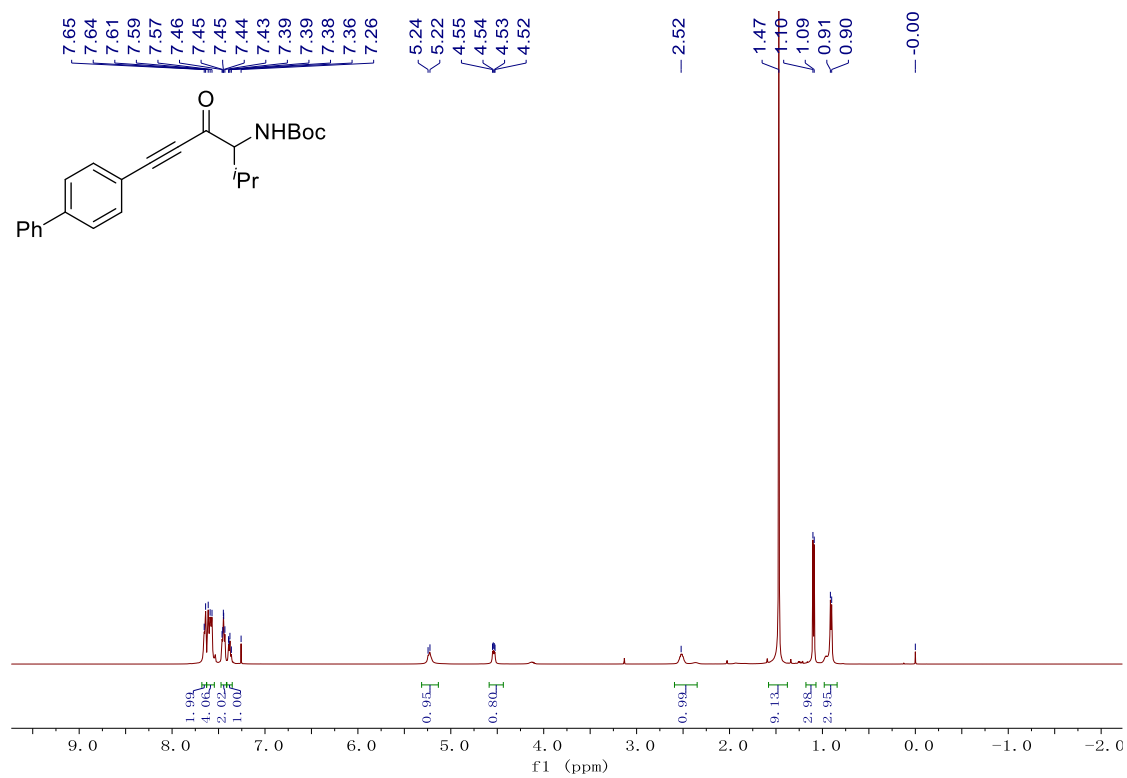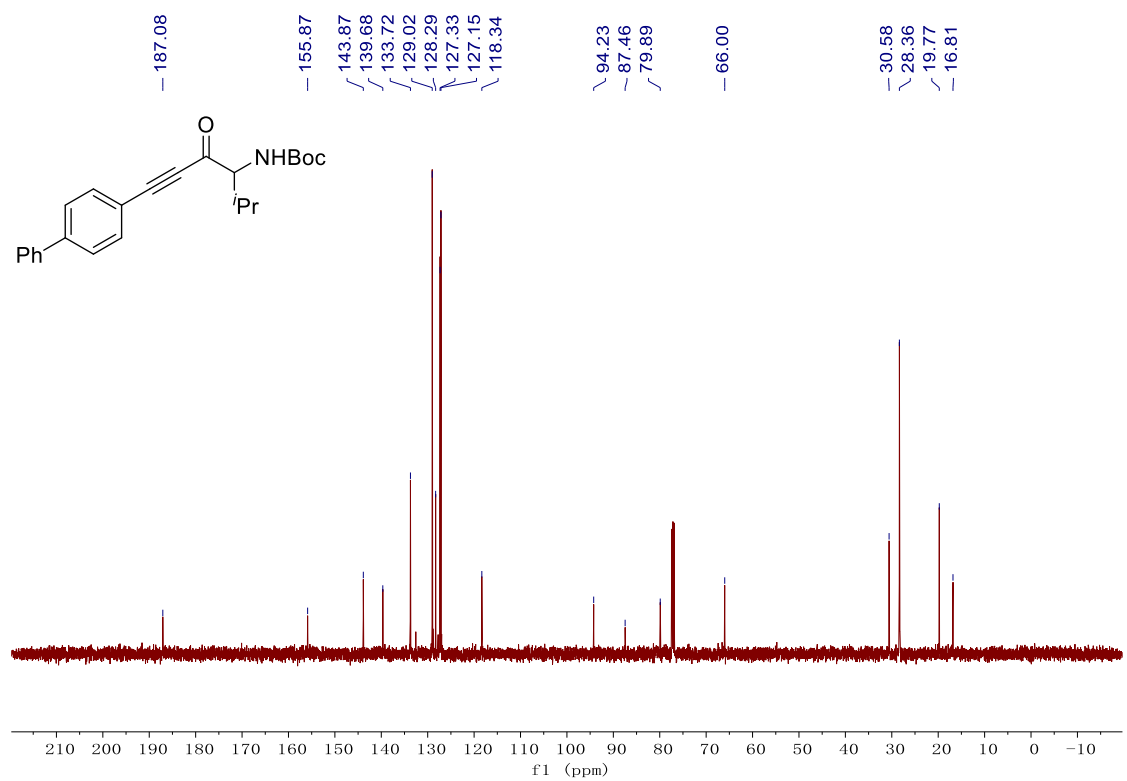

***tert*-butyl (6-(4'-ethyl-[1,1'-biphenyl]-4-yl)-2-methyl-4-oxohex-5-yn-3-yl)carbamate (1r)**

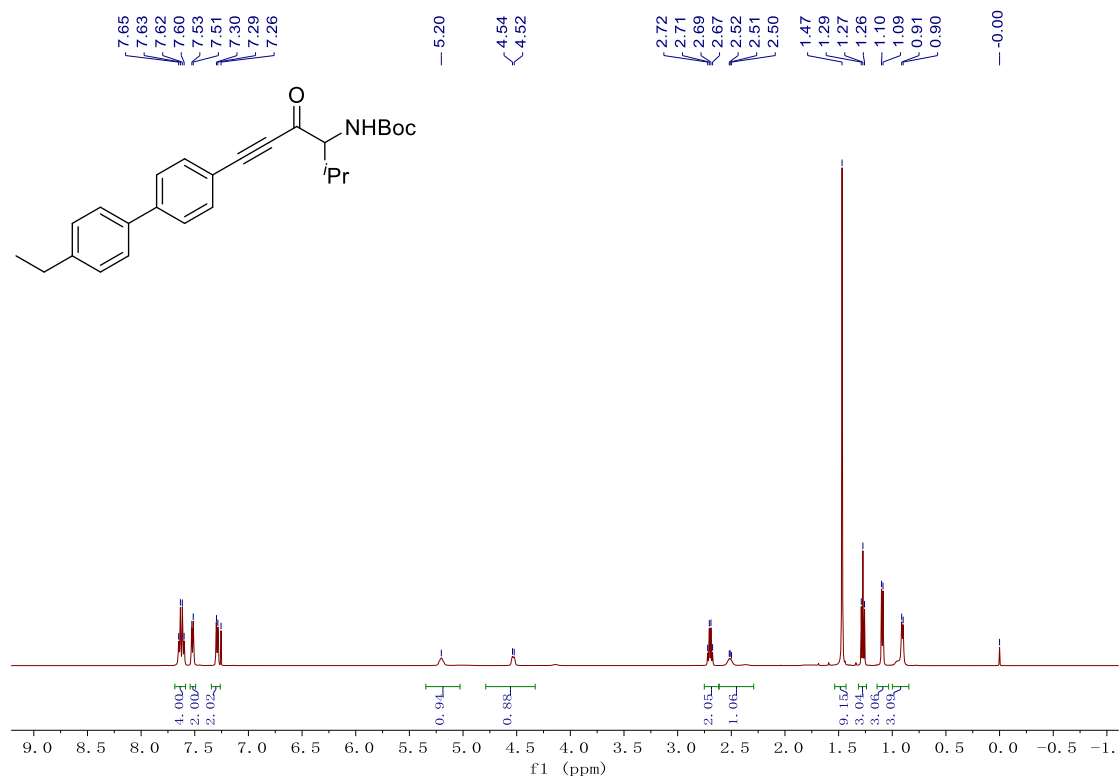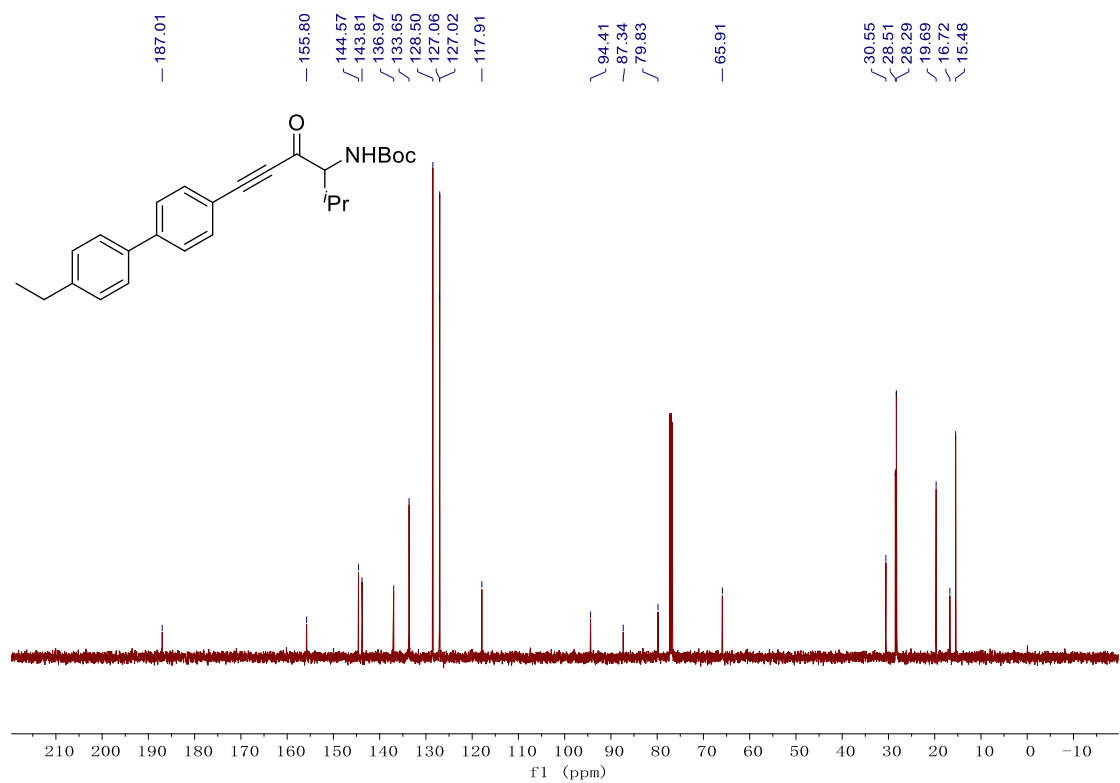

***tert*-butyl (6-(4-ethoxyphenyl)-2-methyl-4-oxohex-5-yn-3-yl)carbamate (1s)**

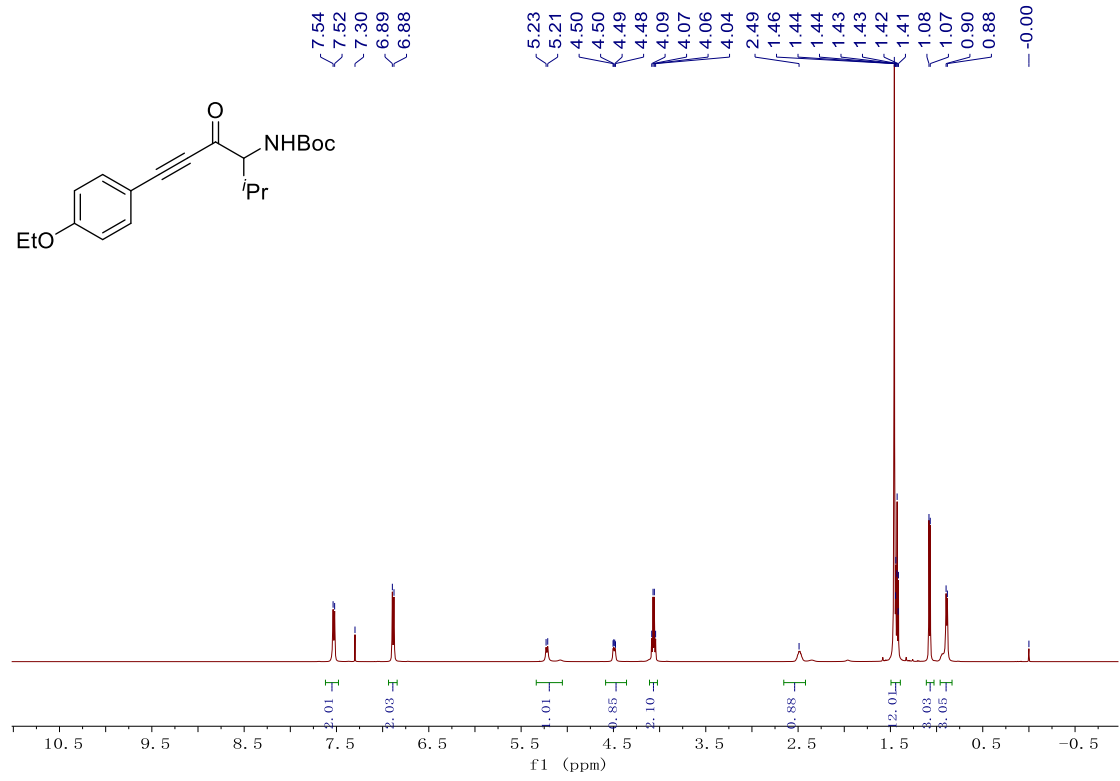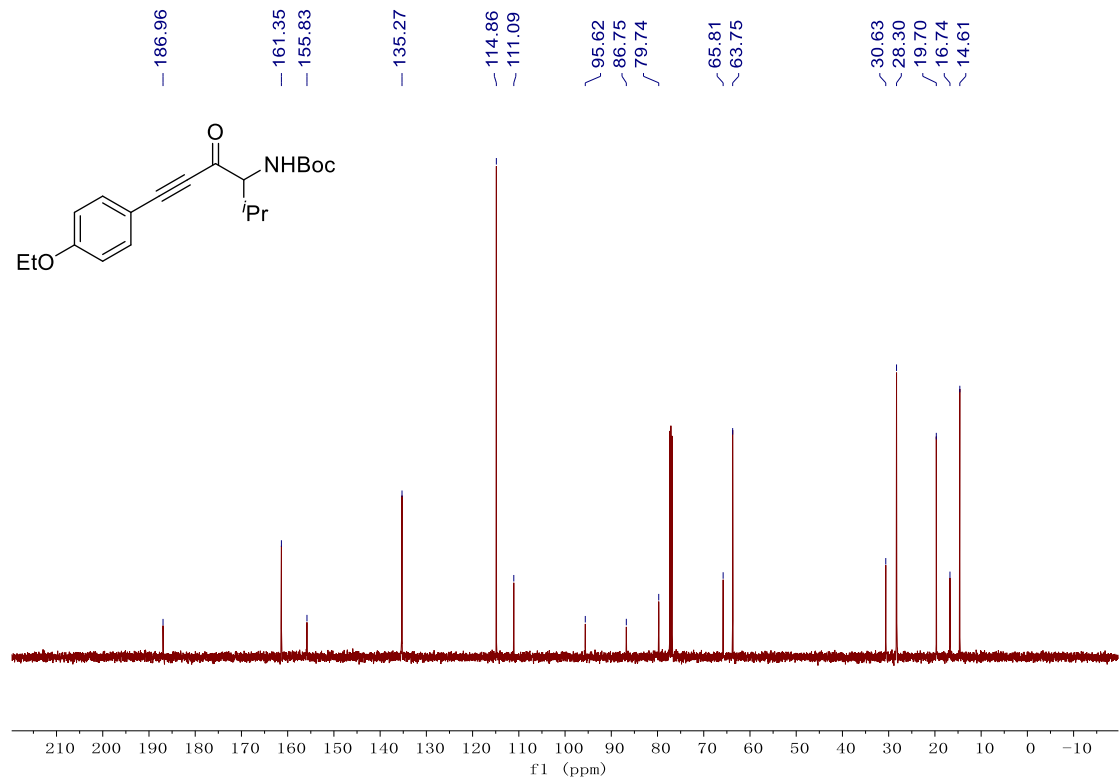

***tert*-butyl (2-methyl-4-oxo-6-(4-(trifluoromethyl)phenyl)hex-5-yn-3-yl)carbamate (1t)**

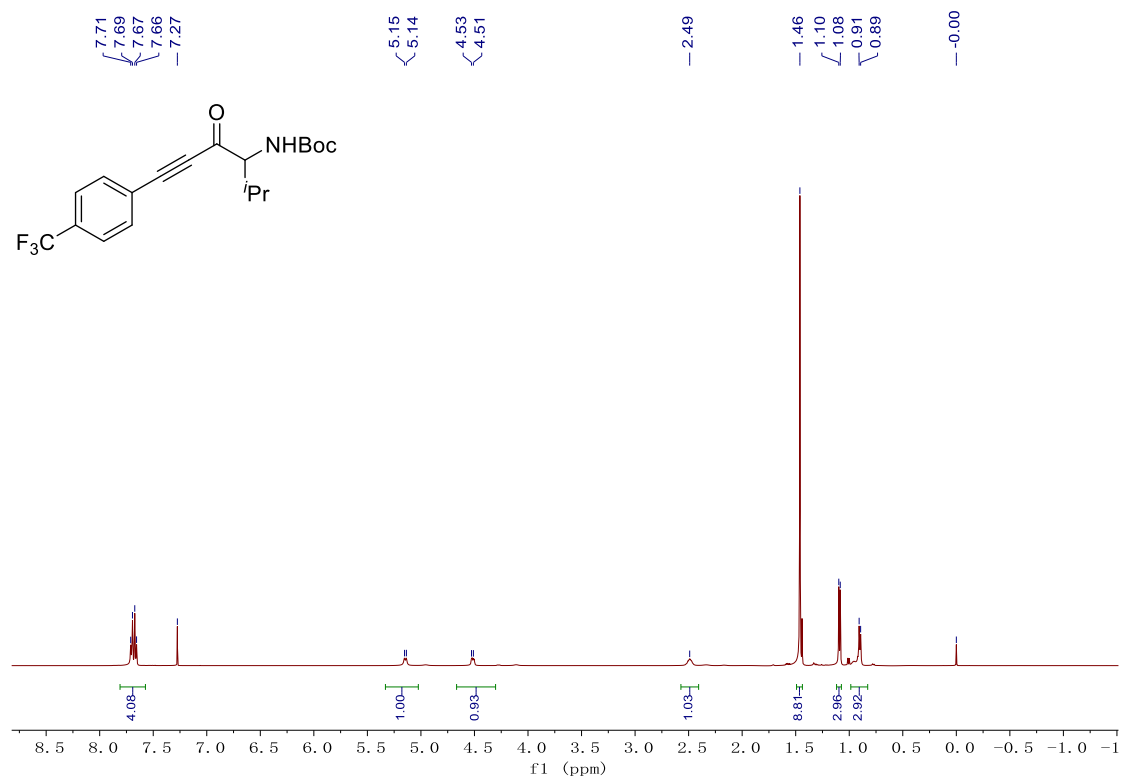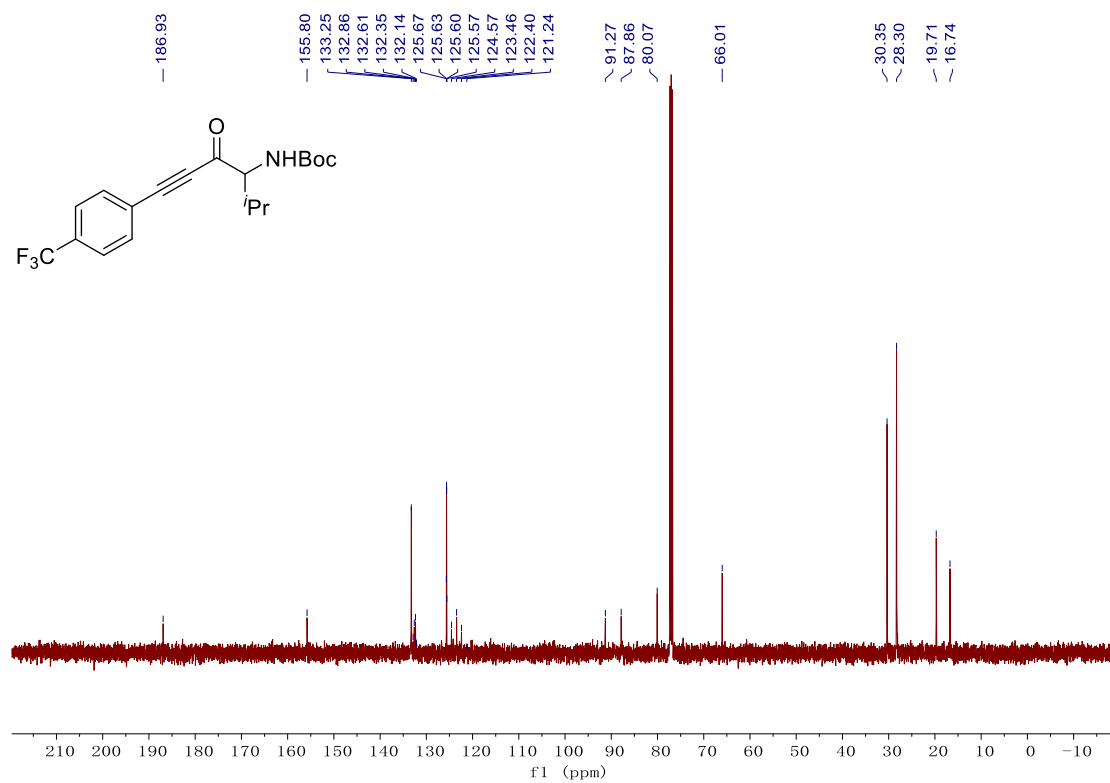

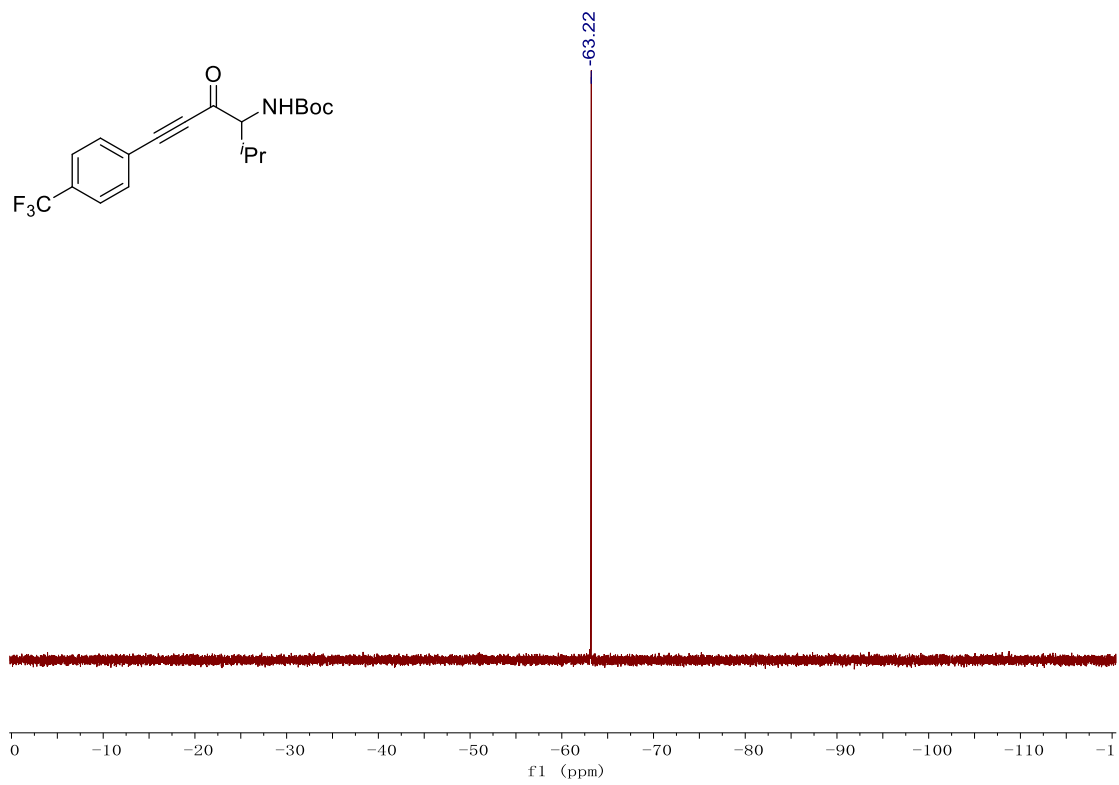

**tert-butyl (6-(3-fluorophenyl)-2-methyl-4-oxohex-5-yn-3-yl)carbamate (1u)**

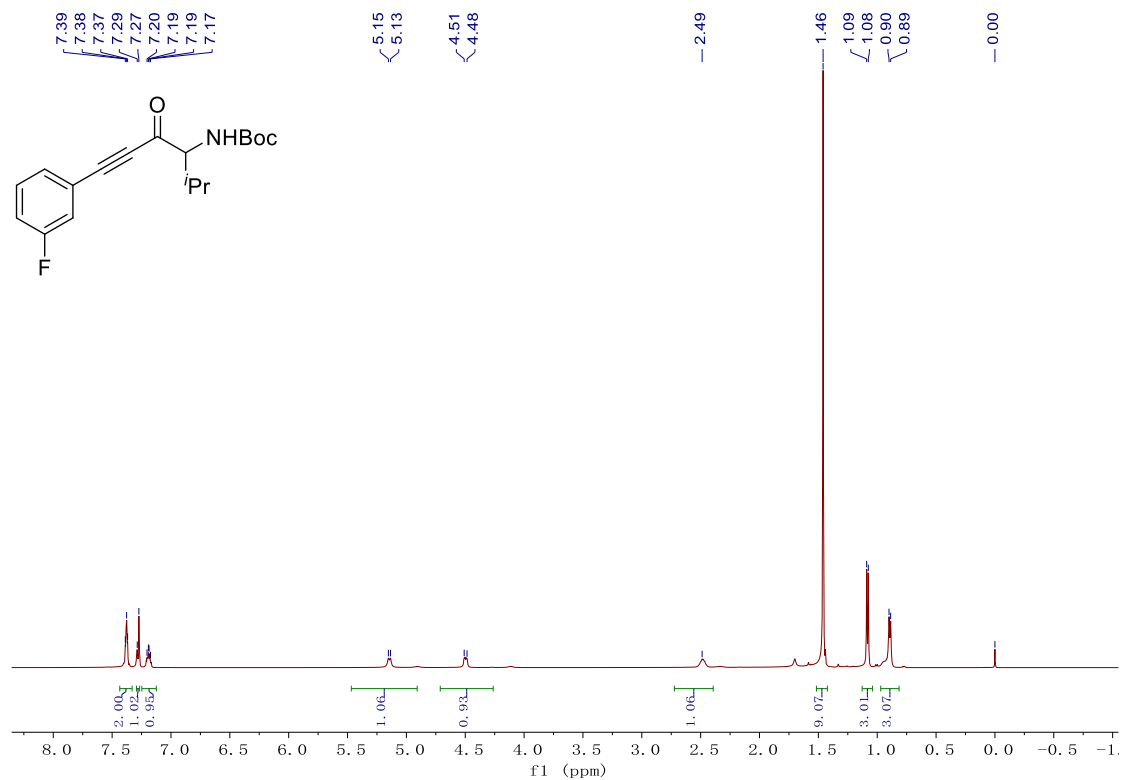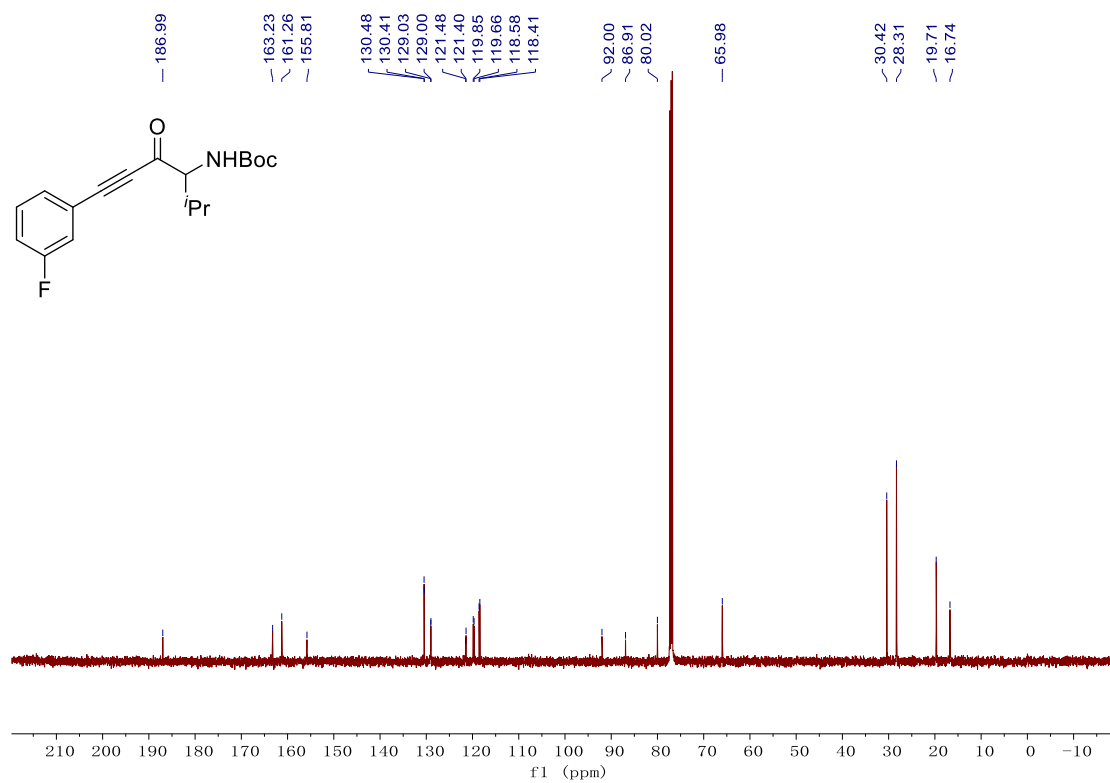

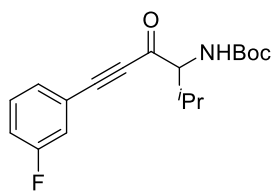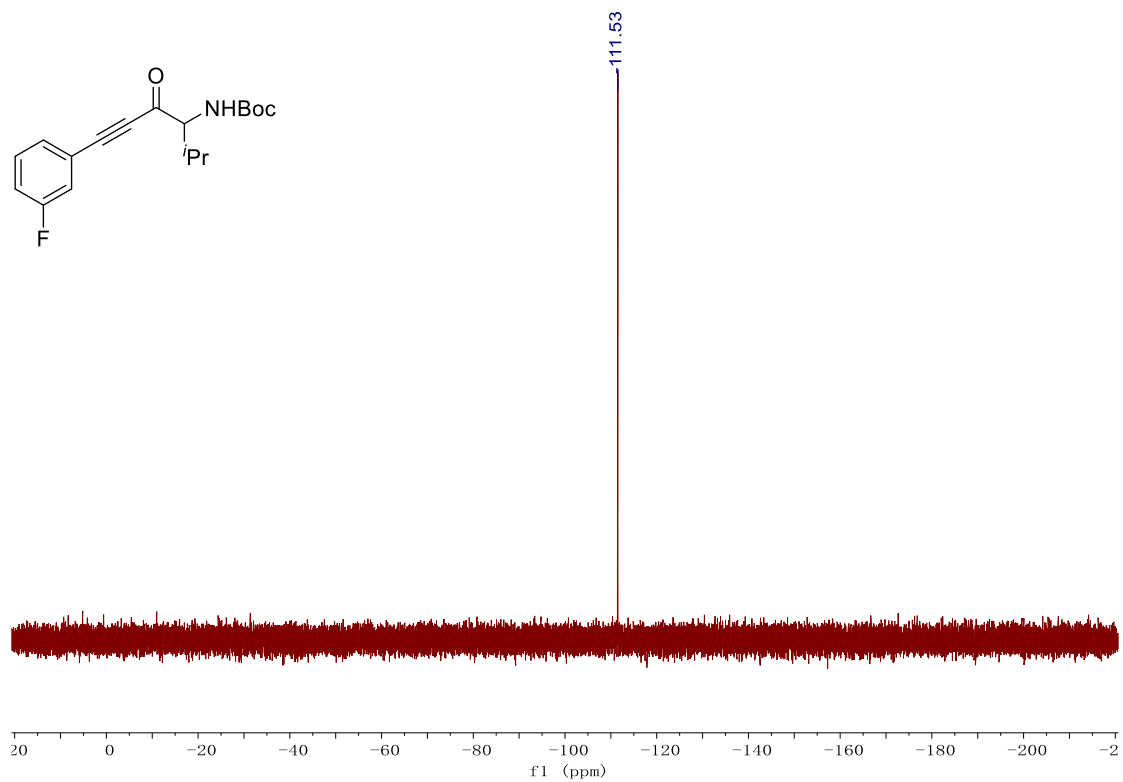

***tert*-butyl (6-(3,5-bis(trifluoromethyl)phenyl)-2-methyl-4-oxohex-5-yn-3-yl)carbamate**

**(1v)**

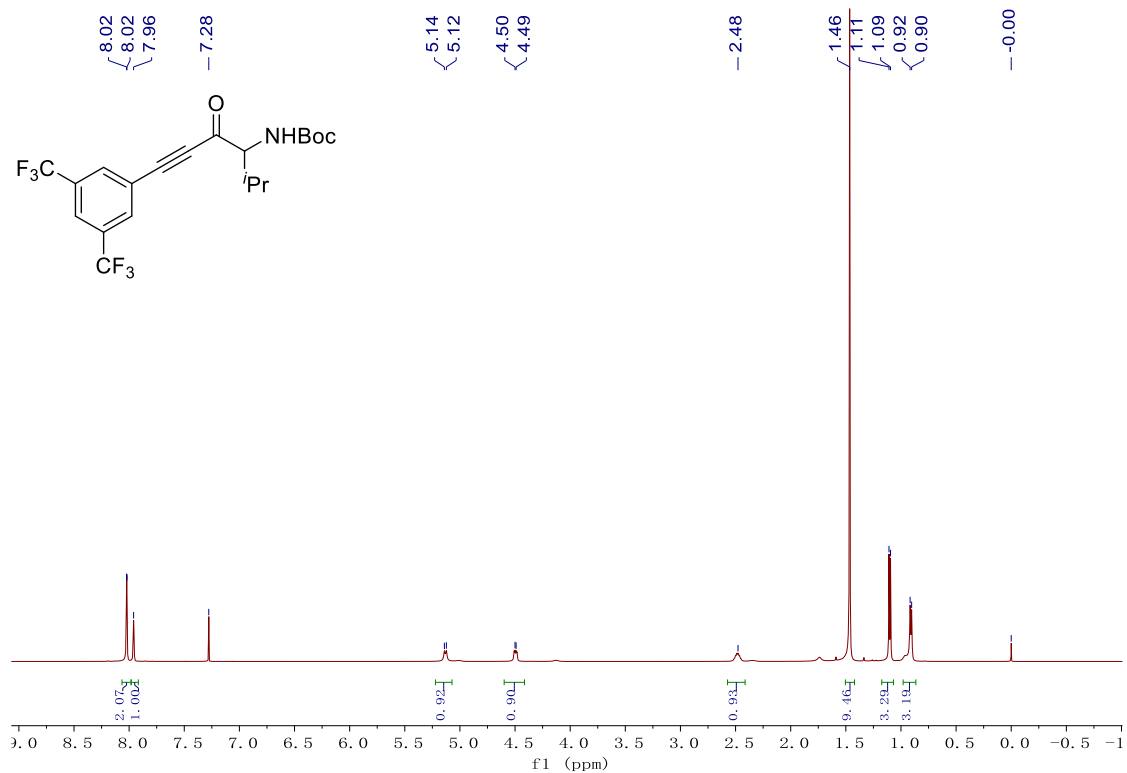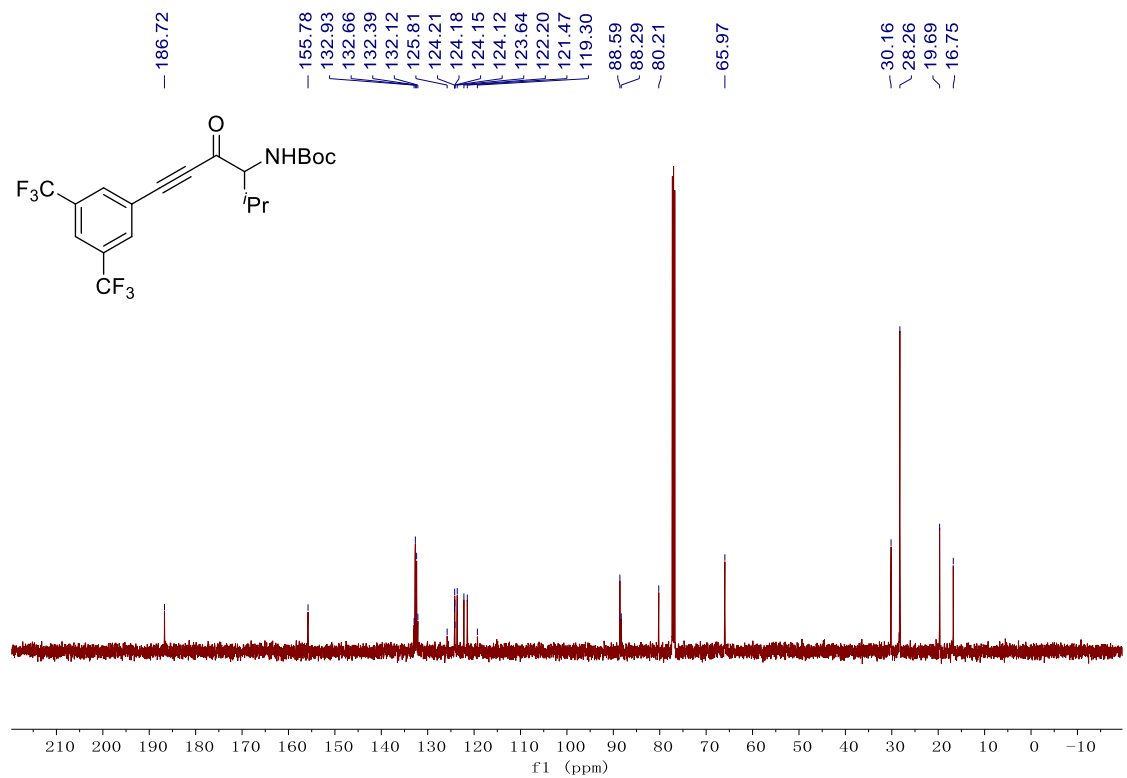



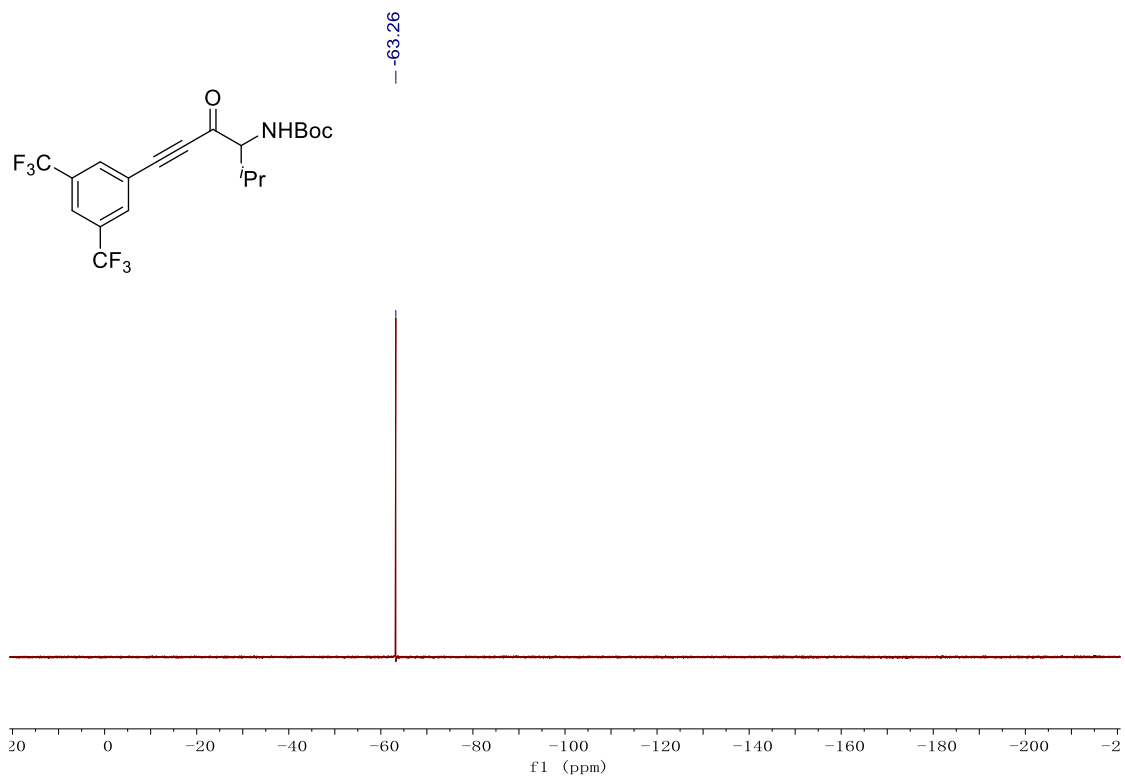

***tert*-butyl (2-methyl-6-(naphthalen-1-yl)-4-oxohex-5-yn-3-yl)carbamate (1w)**

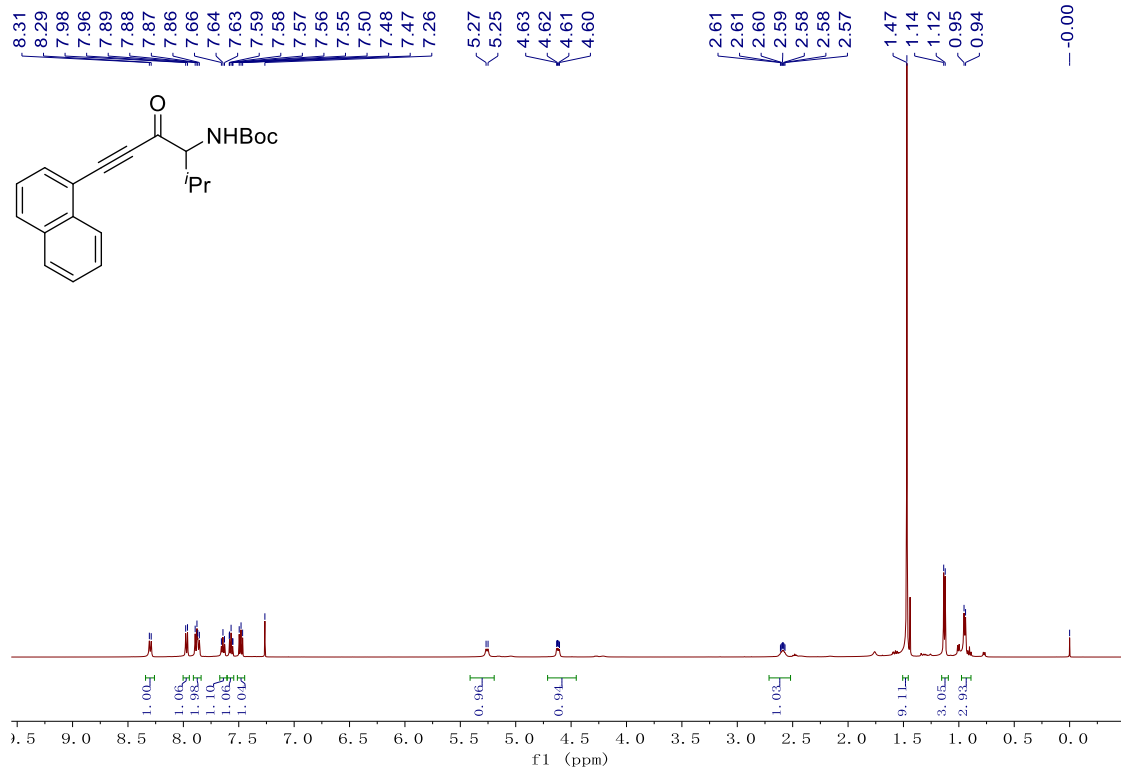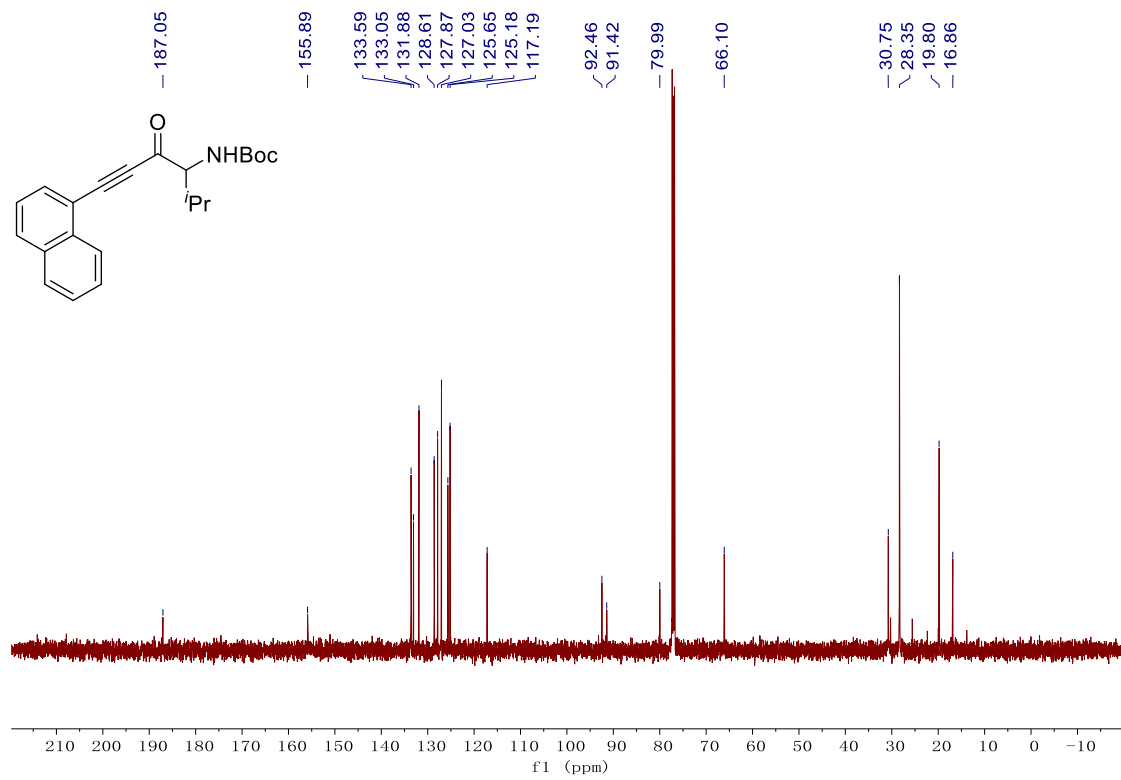

**benzyl (2-methyl-4-oxo-6-phenylhex-5-yn-3-yl)carbamate (1x)**

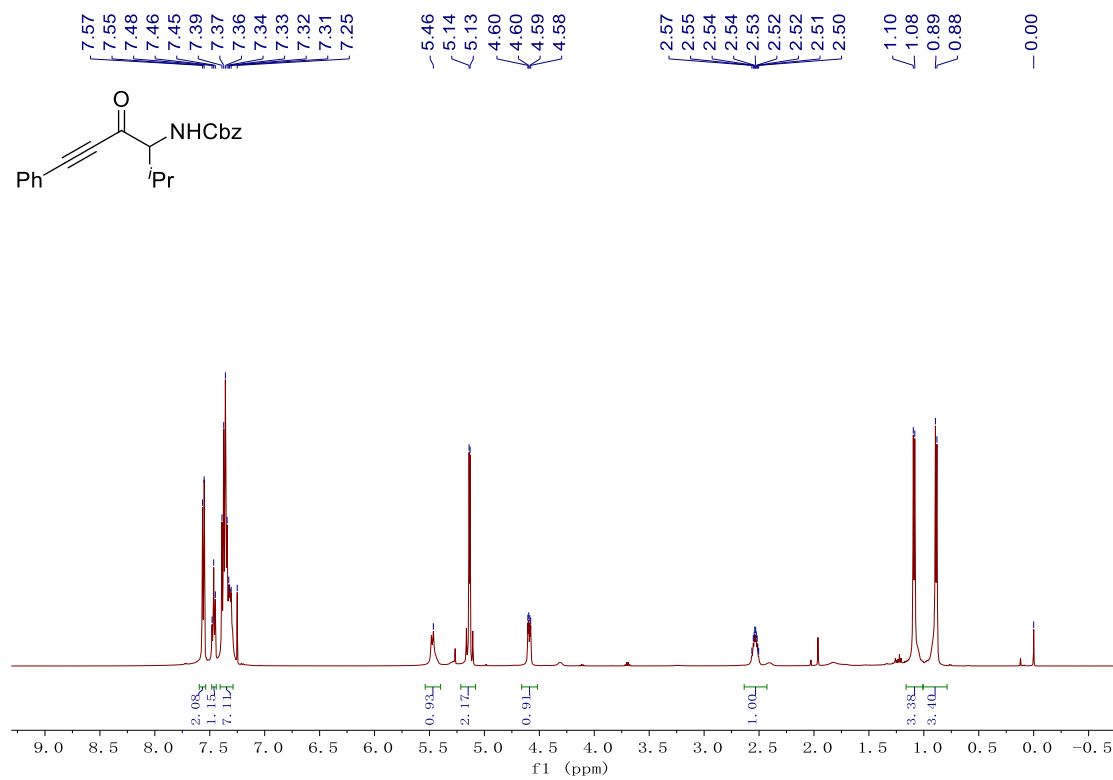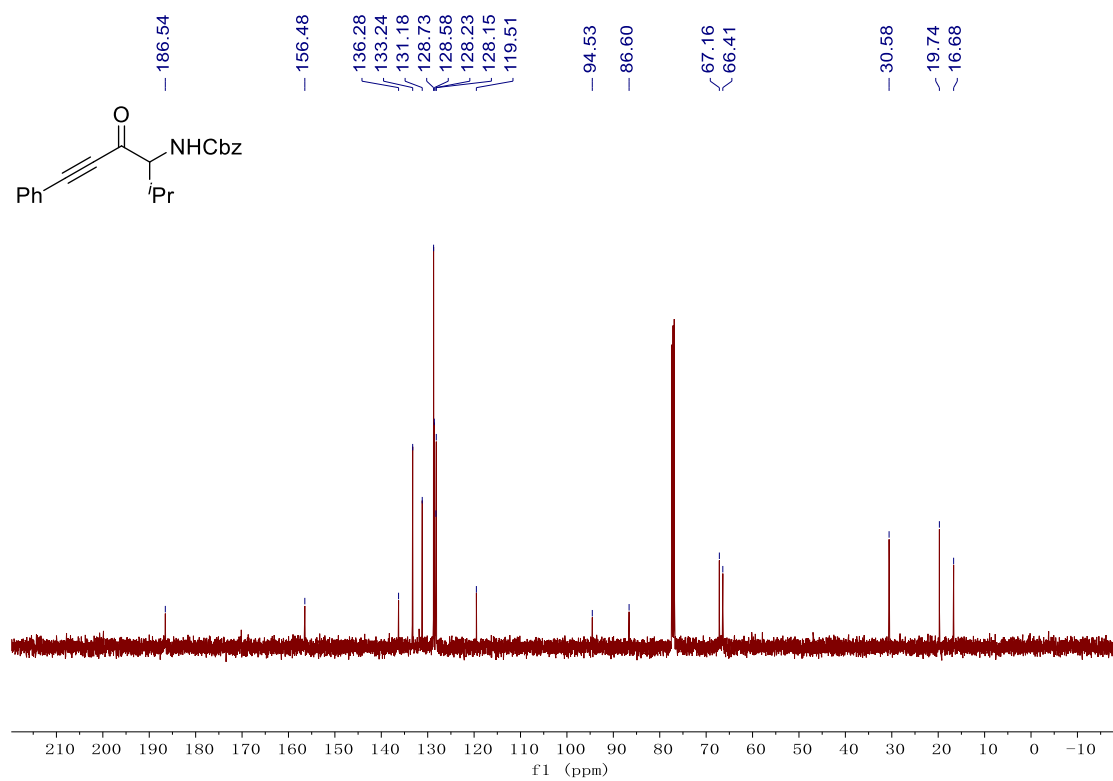

***tert*-butyl (3-oxo-1-phenylhept-1-yn-4-yl)carbamate (1y)**

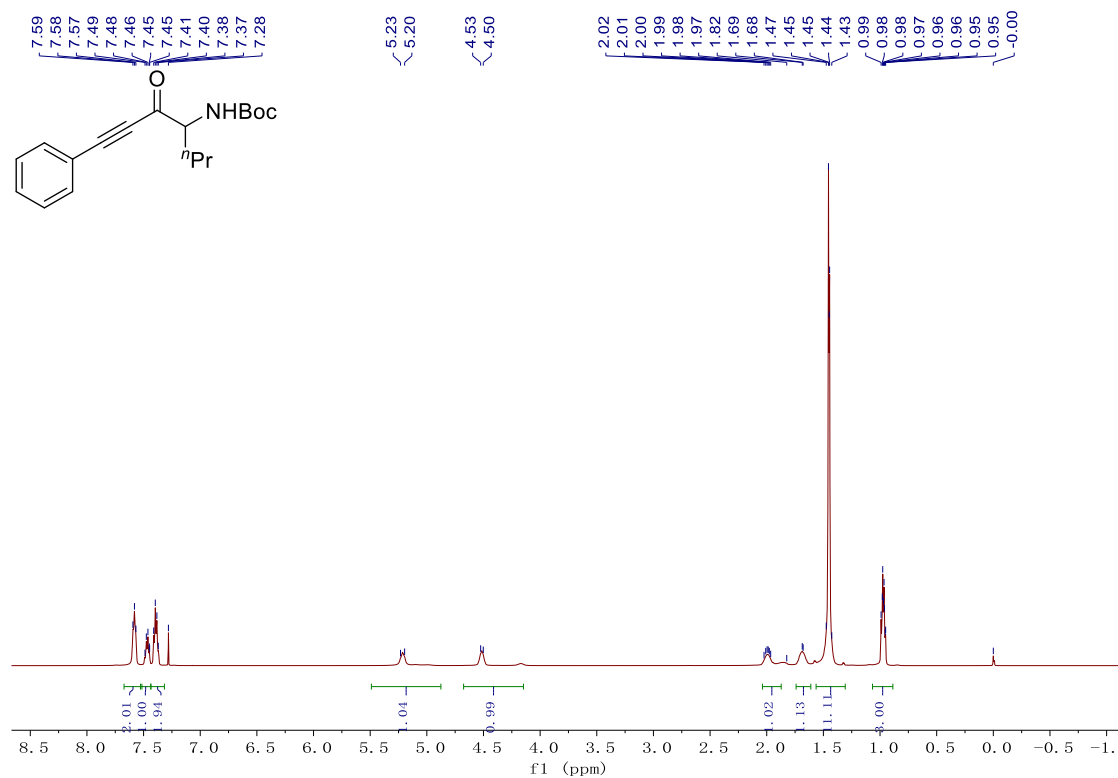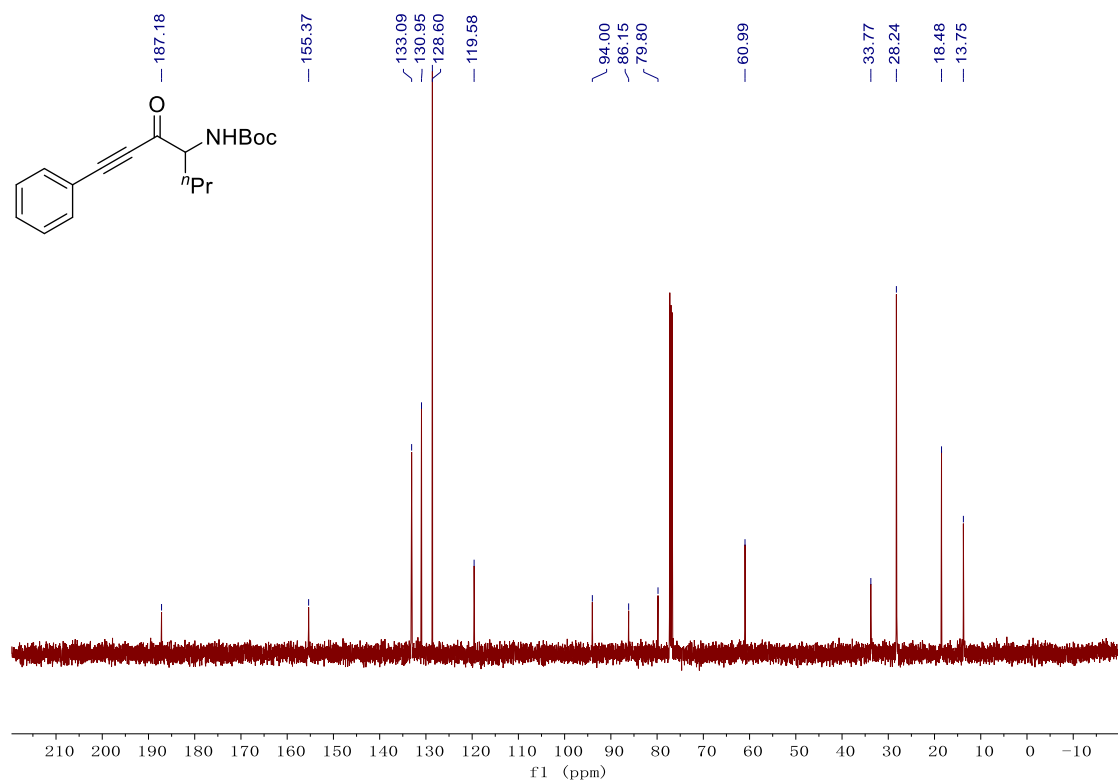

***tert*-butyl (1-cyclopentyl-2-oxo-4-phenylbut-3-yn-1-yl)carbamate (1z)**

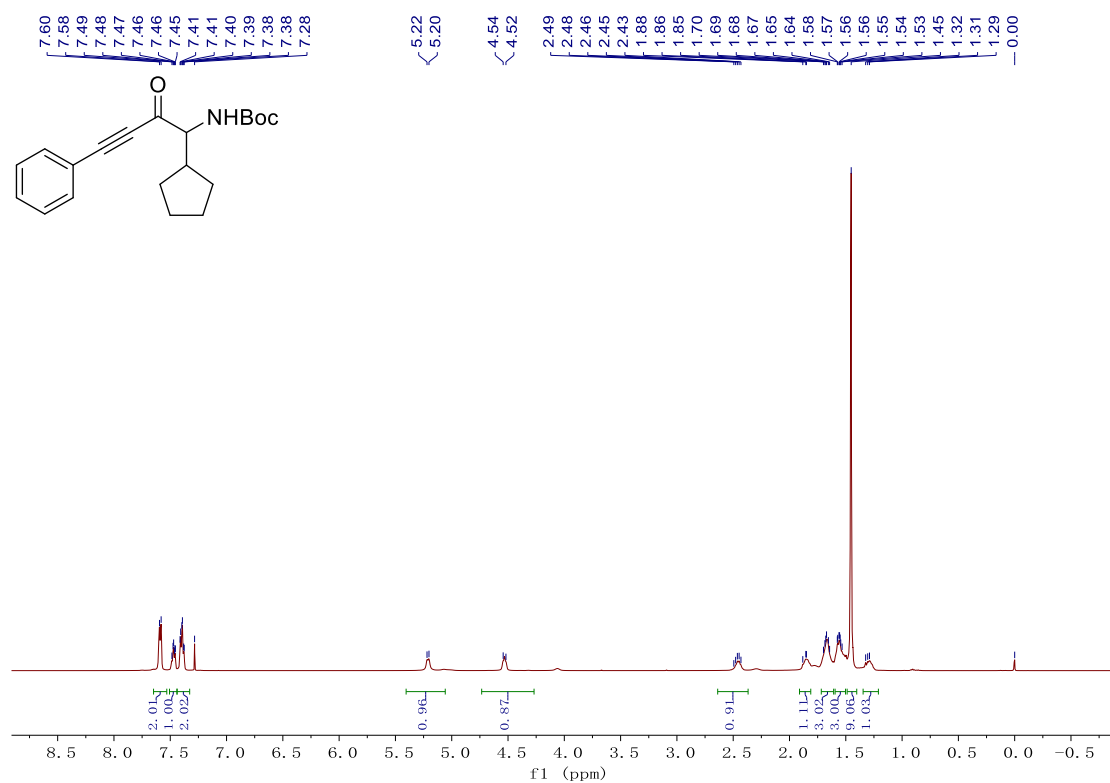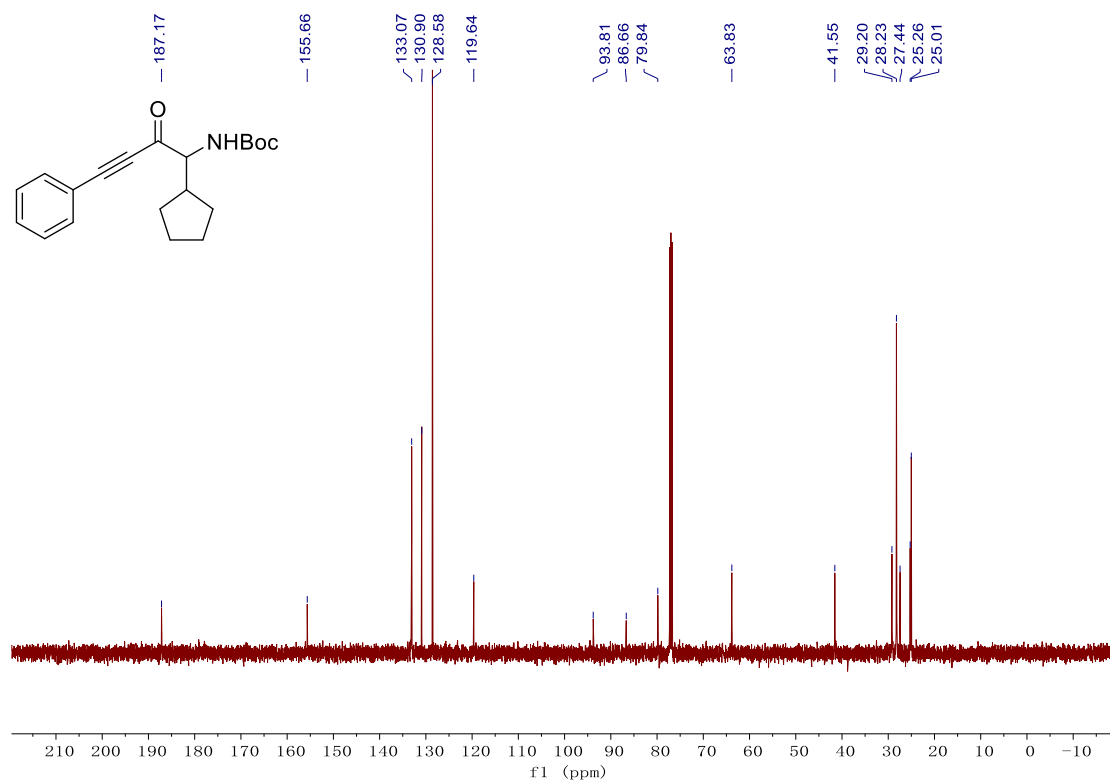

***tert*-butyl (1-cyclohexyl-2-oxo-4-phenylbut-3-yn-1-yl)carbamate (1aa)**

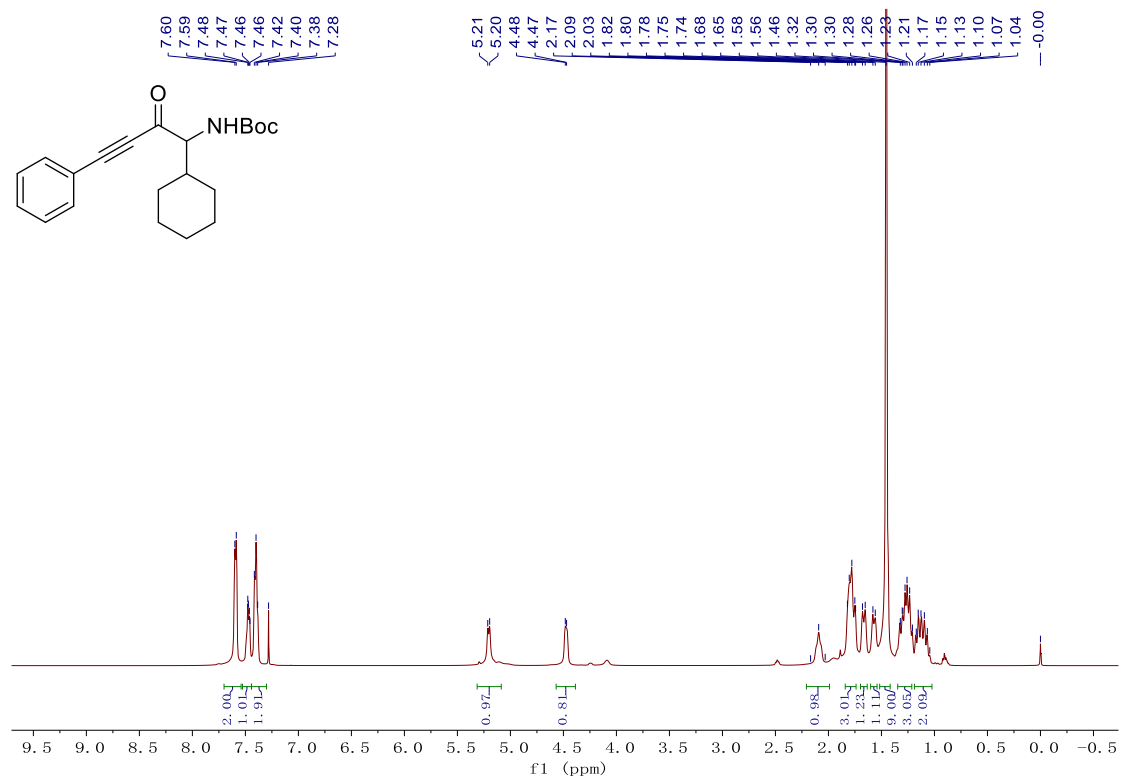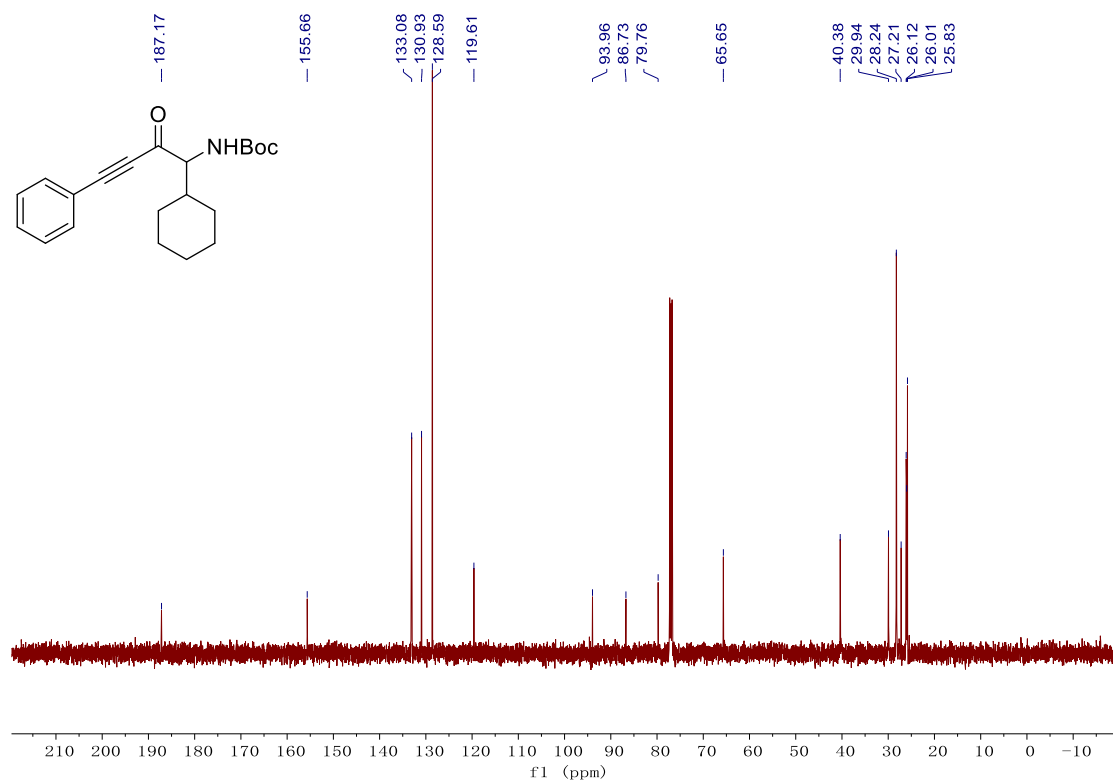

***tert*-butyl (2-oxo-1,4-diphenylbut-3-yn-1-yl)carbamate (1ab)**

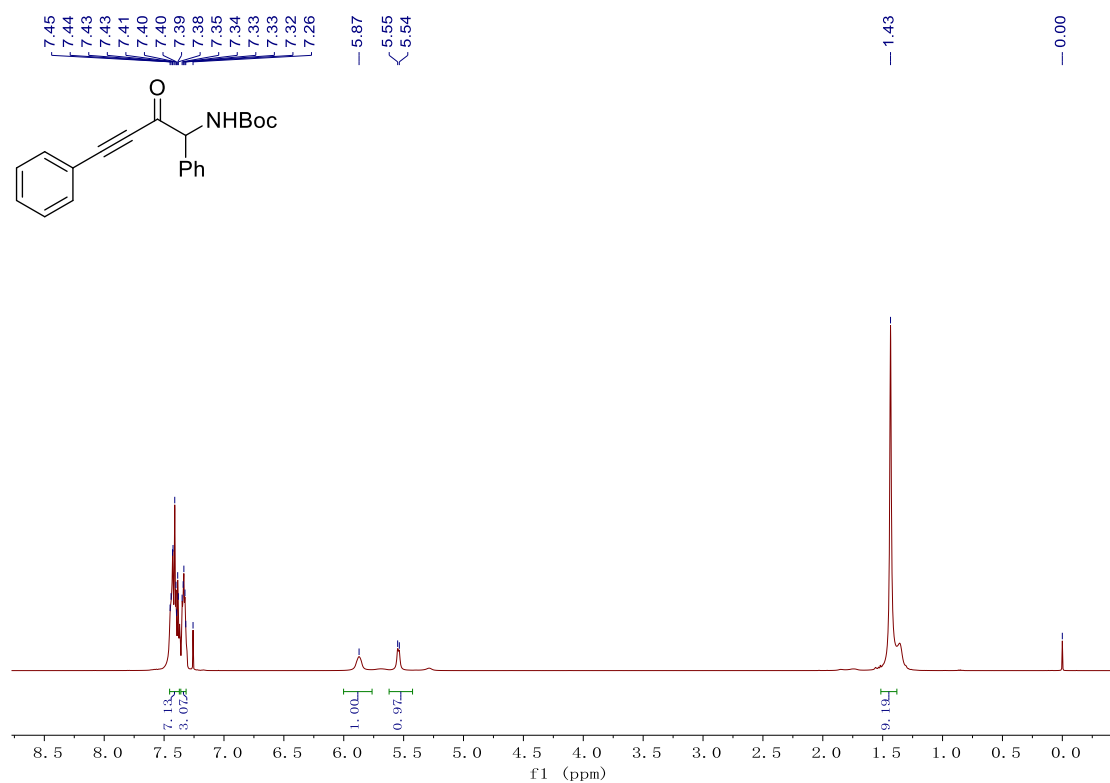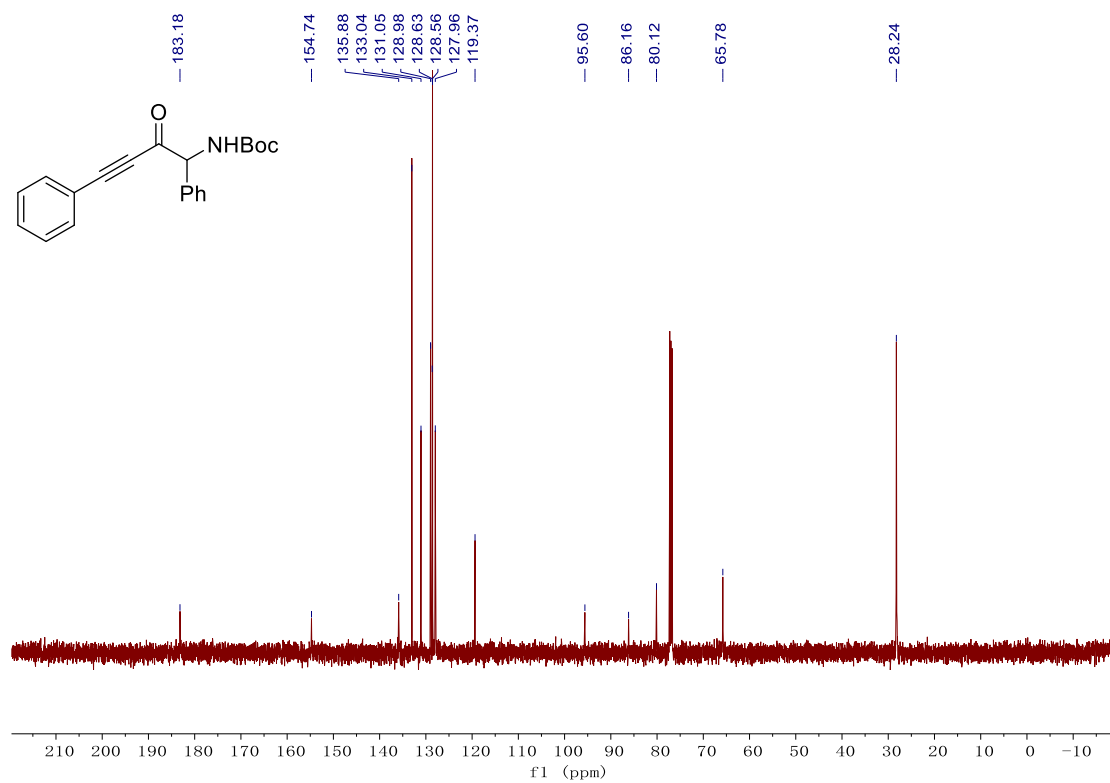

***tert*-butyl 2-isopropyl-3-oxo-5-phenyl-2,3-dihydro-1H-pyrrole-1-carboxylate (7)**

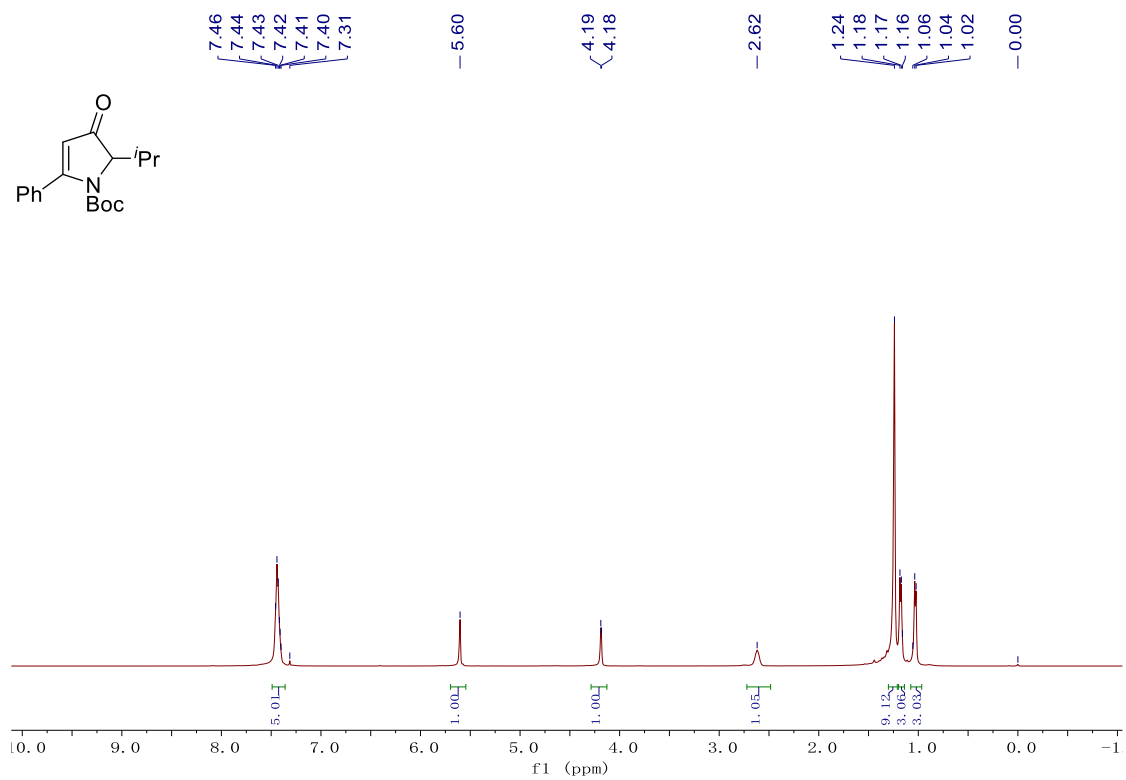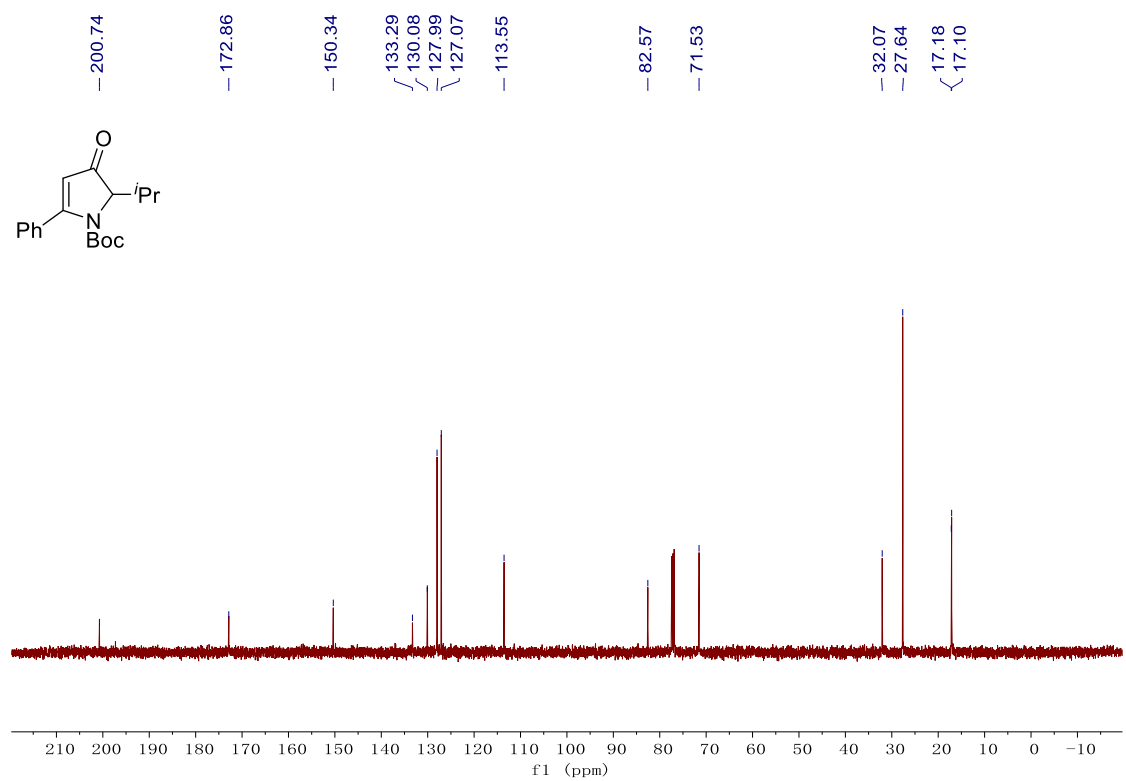



**Dibenzyl (*R*)-1-(1-(tert-butoxycarbonyl)-2-isopropyl-3-oxo-5-phenyl-2,3-dihydro-1H-pyrrol-2-yl)hydrazine-1,2-dicarboxylate (3a)**

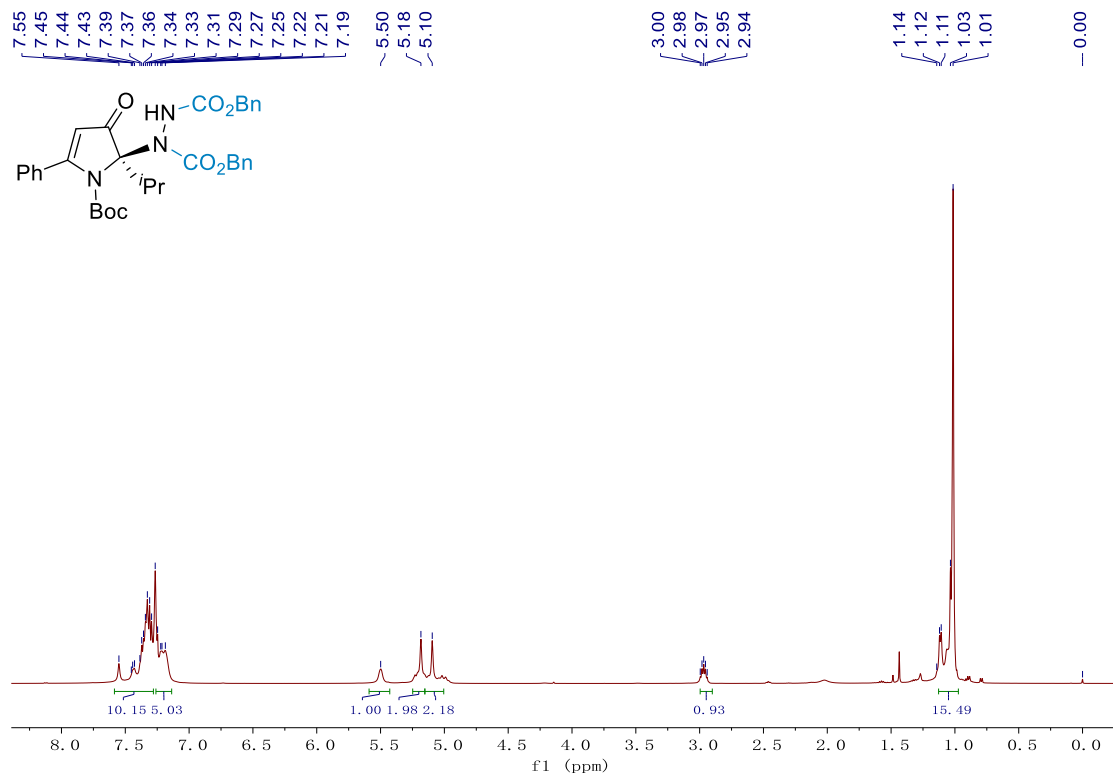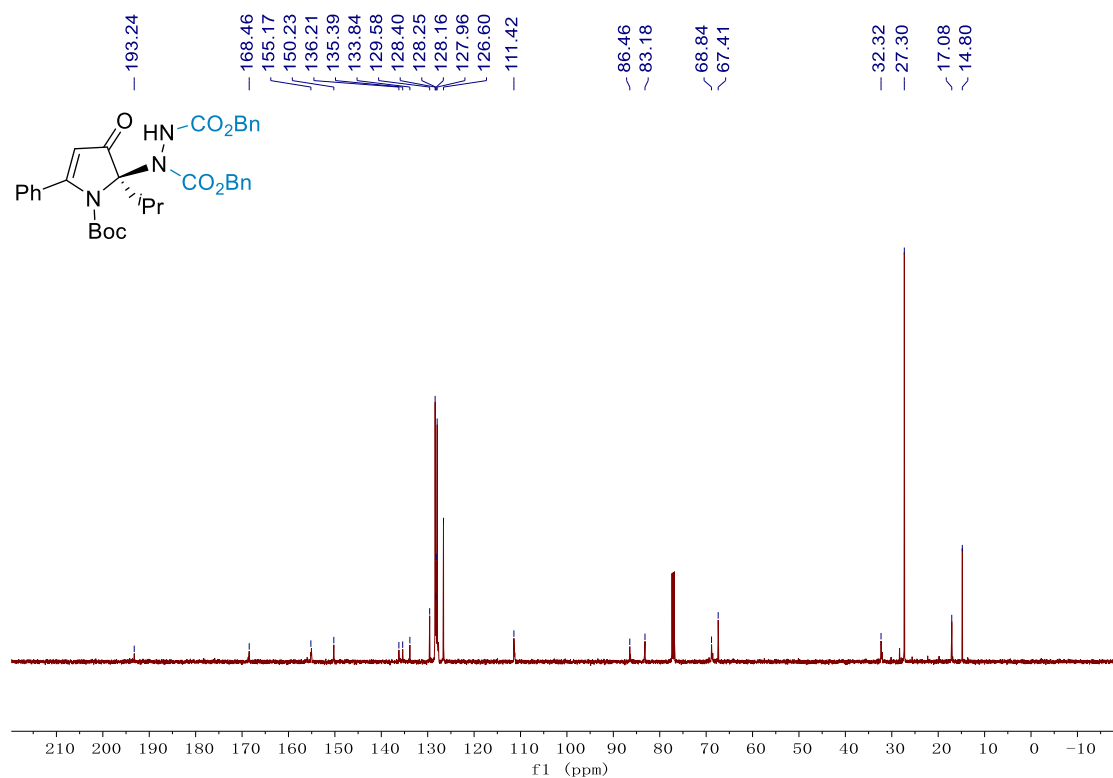

diethyl (R)-1-(1-(tert-butoxycarbonyl)-2-isopropyl-3-oxo-5-phenyl-2,3-dihydro-1H-pyrrol-2-yl)hydrazine-1,2-dicarboxylate (3b)

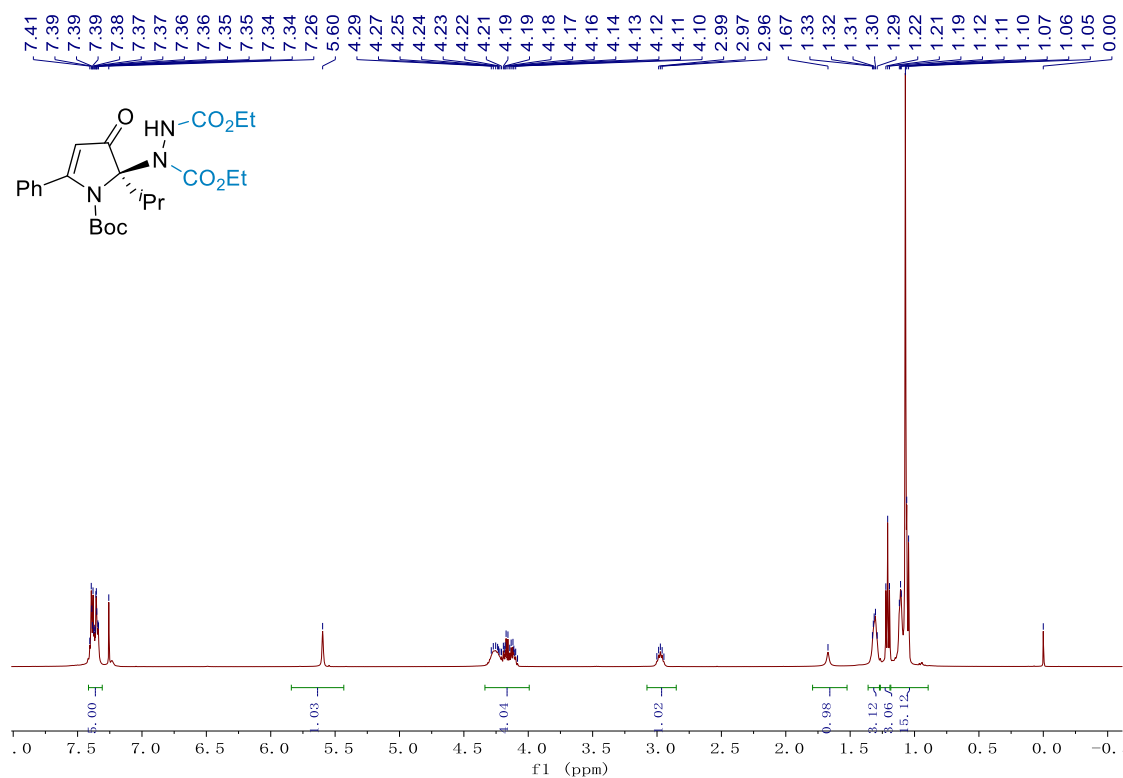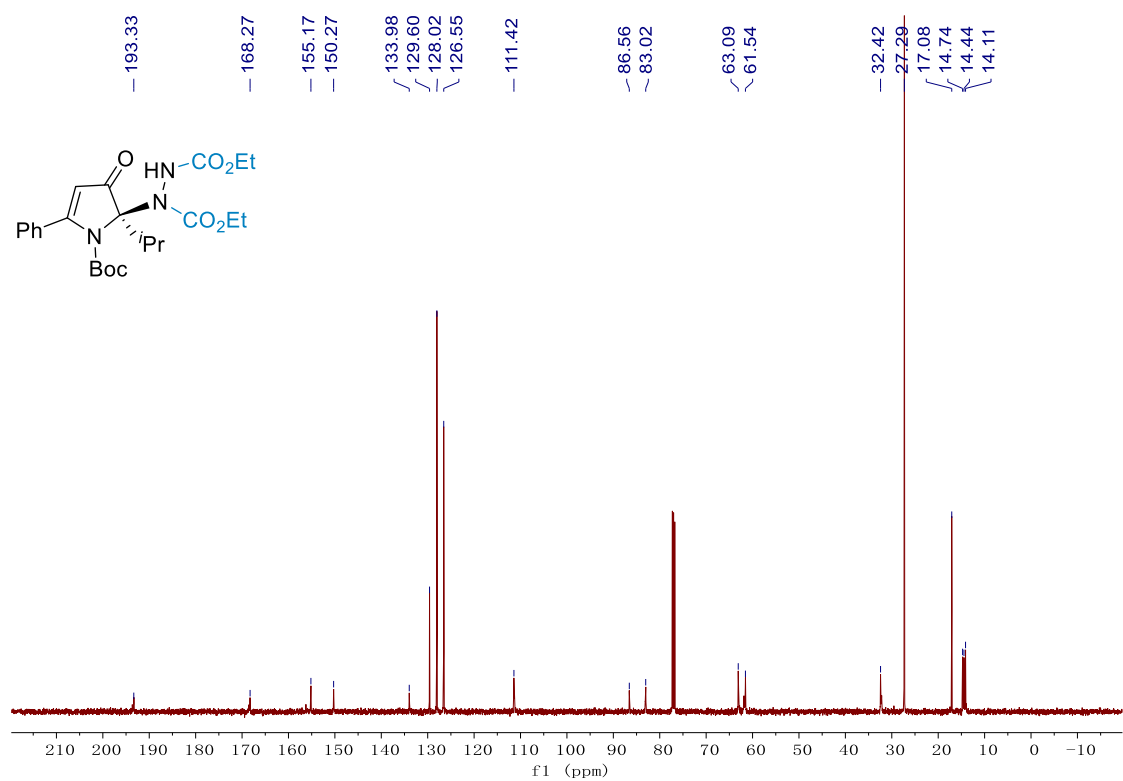

**diisopropyl (R)-1-(1-(tert-butoxycarbonyl)-2-isopropyl-3-oxo-5-phenyl-2,3-dihydro-1H-pyrrol-2-yl)hydrazine-1,2-dicarboxylate (3c)**

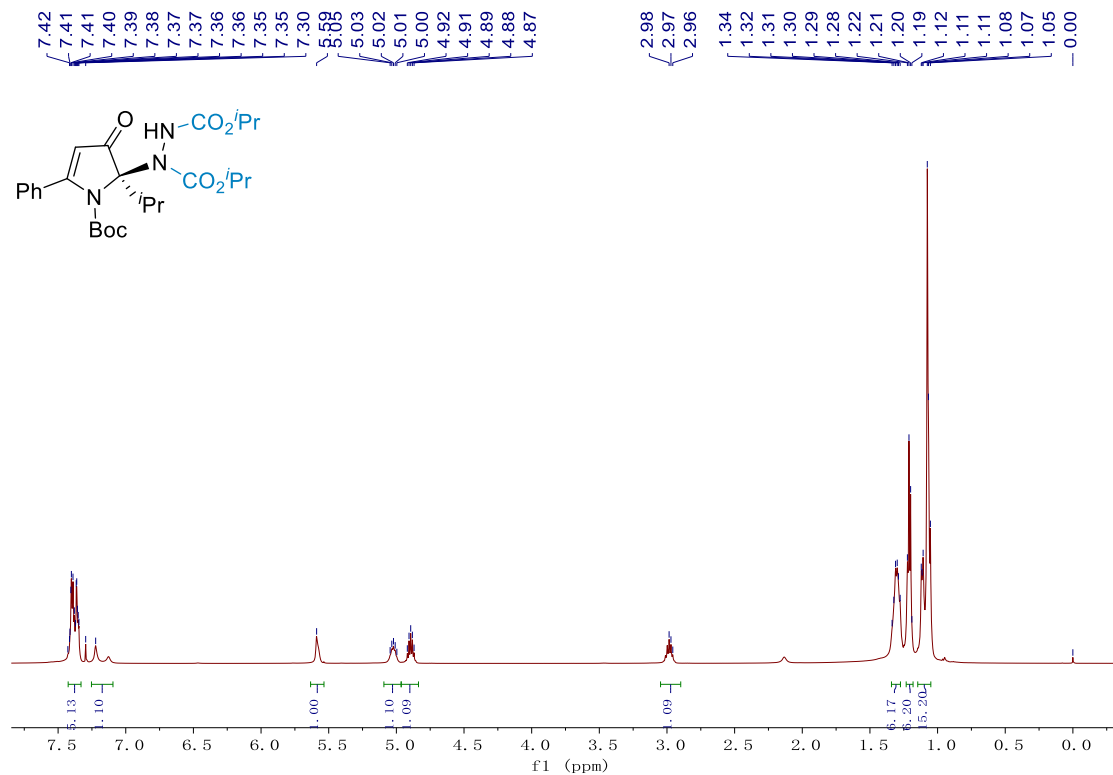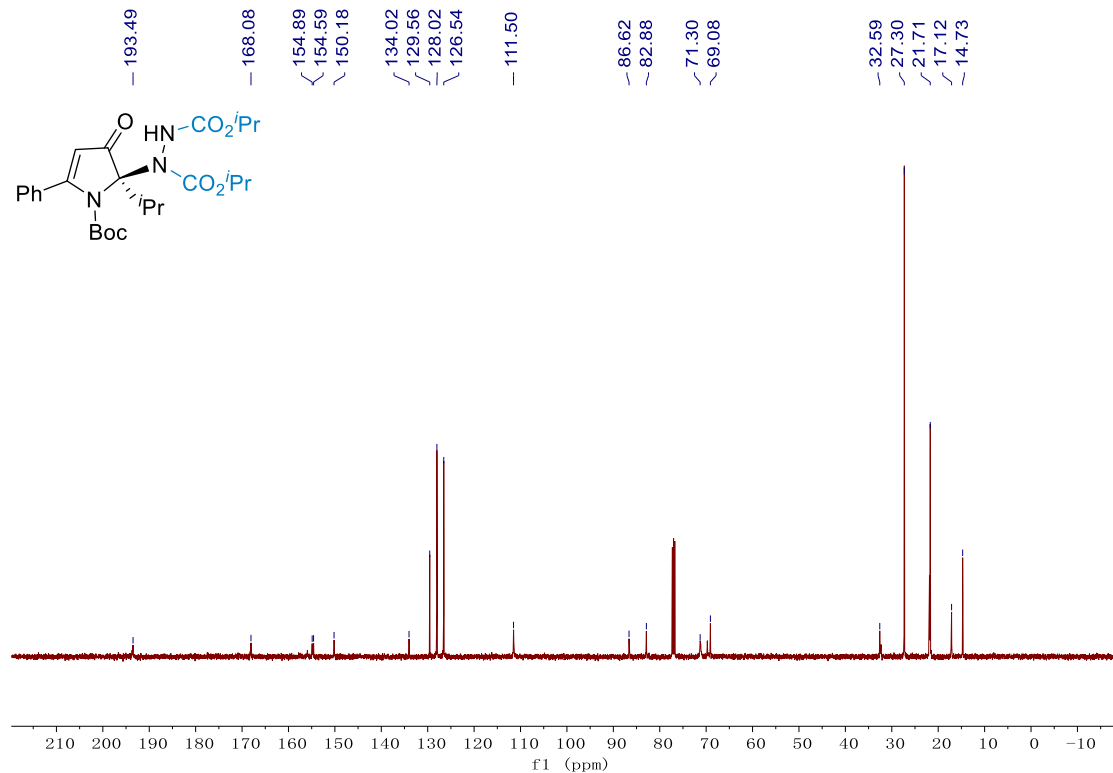

**diethyl (*R*)-1-(1-(tert-butoxycarbonyl)-2-isopropyl-3-oxo-5-(*p*-tolyl)-2,3-dihydro-1H-pyrrol-2-yl)hydrazine-1,2-dicarboxylate (**3d**)**

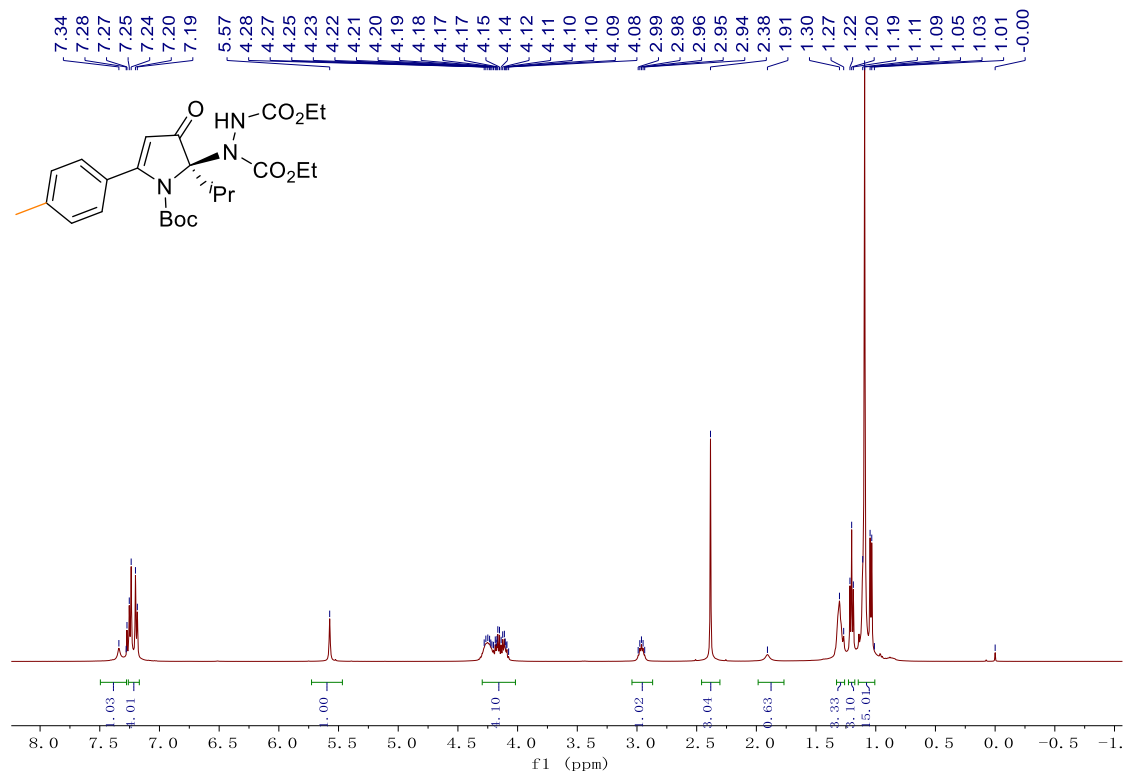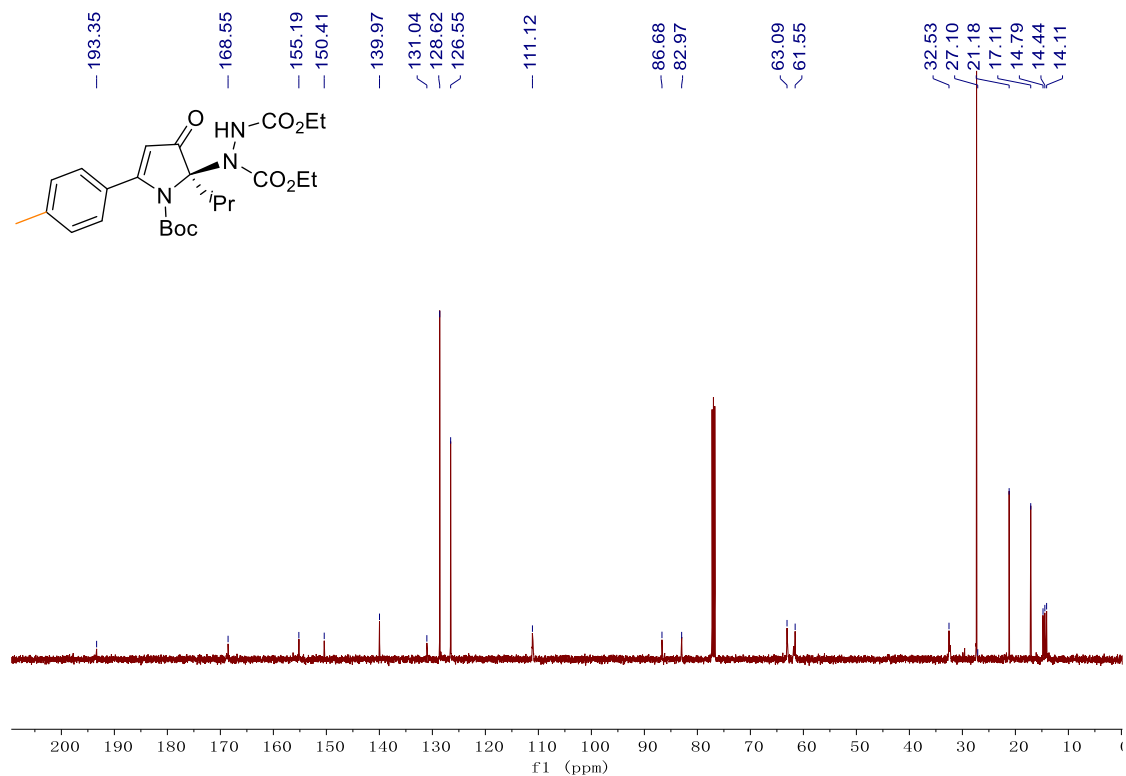

**diethyl (R)-1-(1-(tert-butoxycarbonyl)-2-isopropyl-5-(4-methoxyphenyl)-3-oxo-2,3-dihydro-1H-pyrrol-2-yl)hydrazine-1,2-dicarboxylate (3e)**

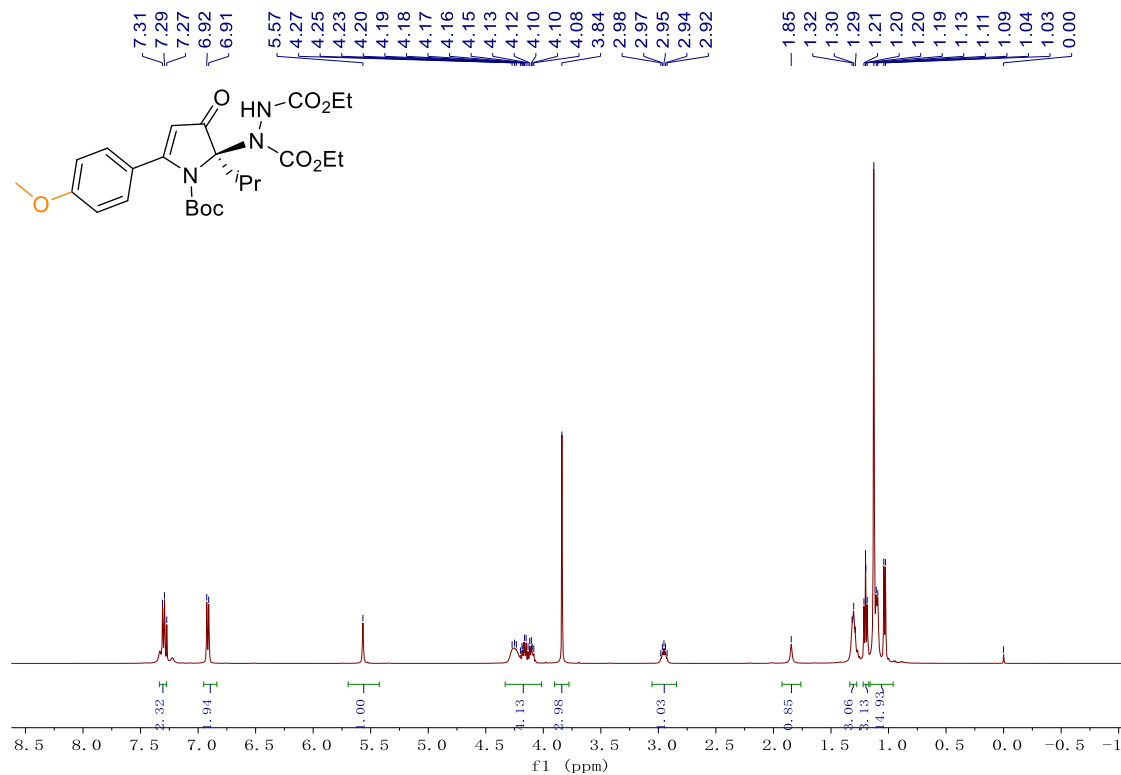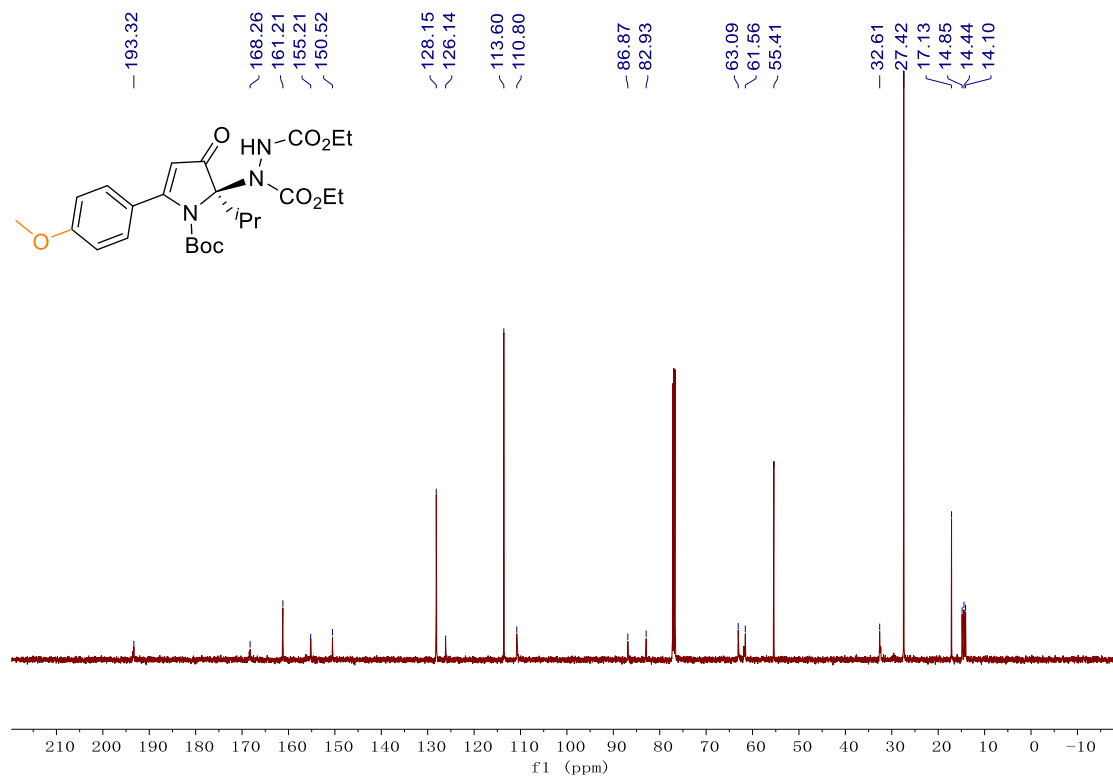

**diethyl (R)-1-(1-(tert-butoxycarbonyl)-5-(4-fluorophenyl)-2-isopropyl-3-oxo-2,3-dihydro-1H-pyrrol-2-yl)hydrazine-1,2-dicarboxylate (3f)**

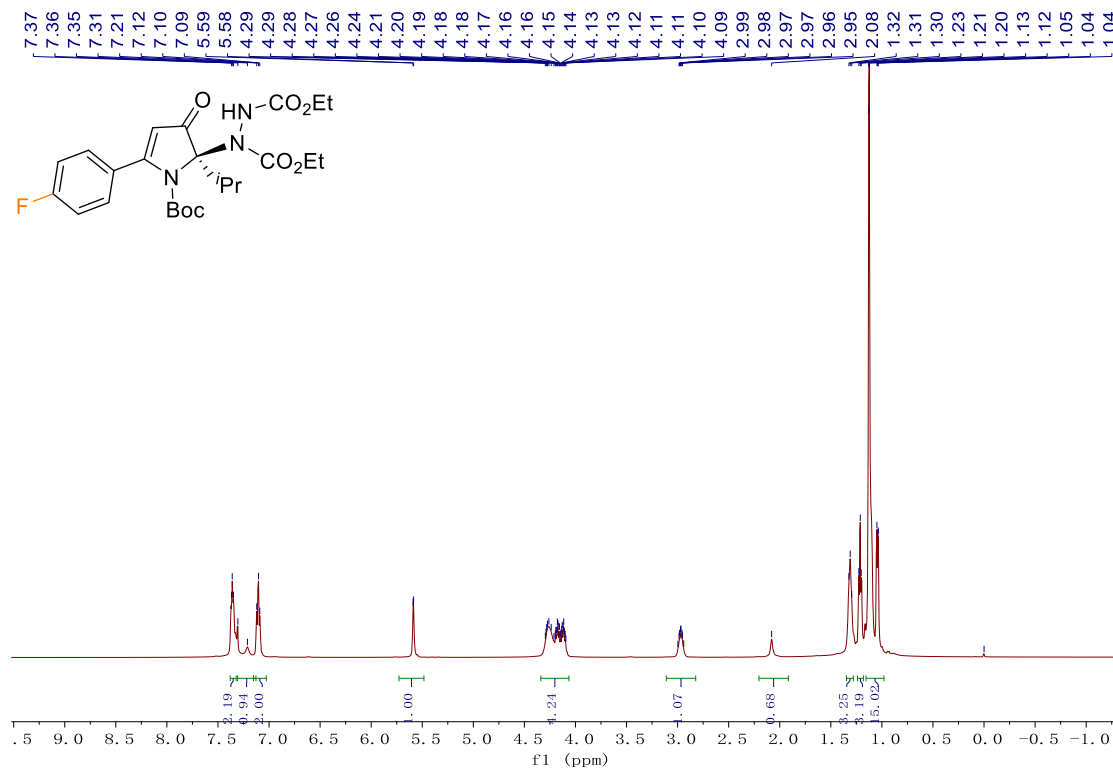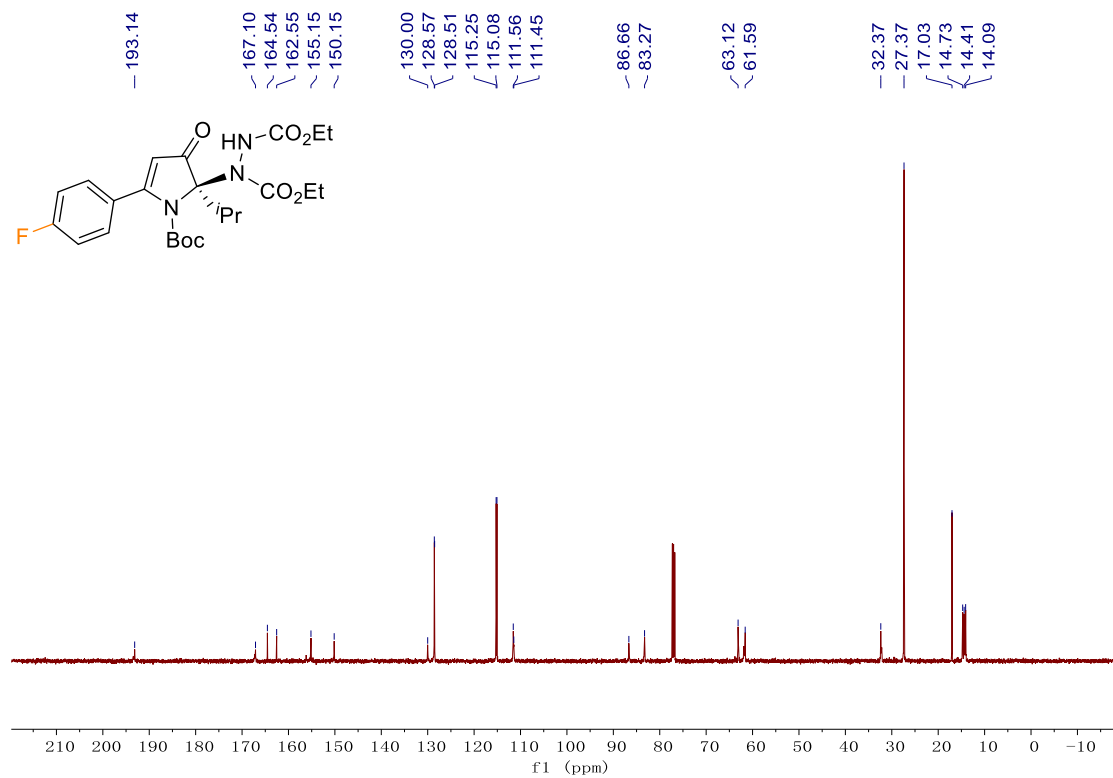

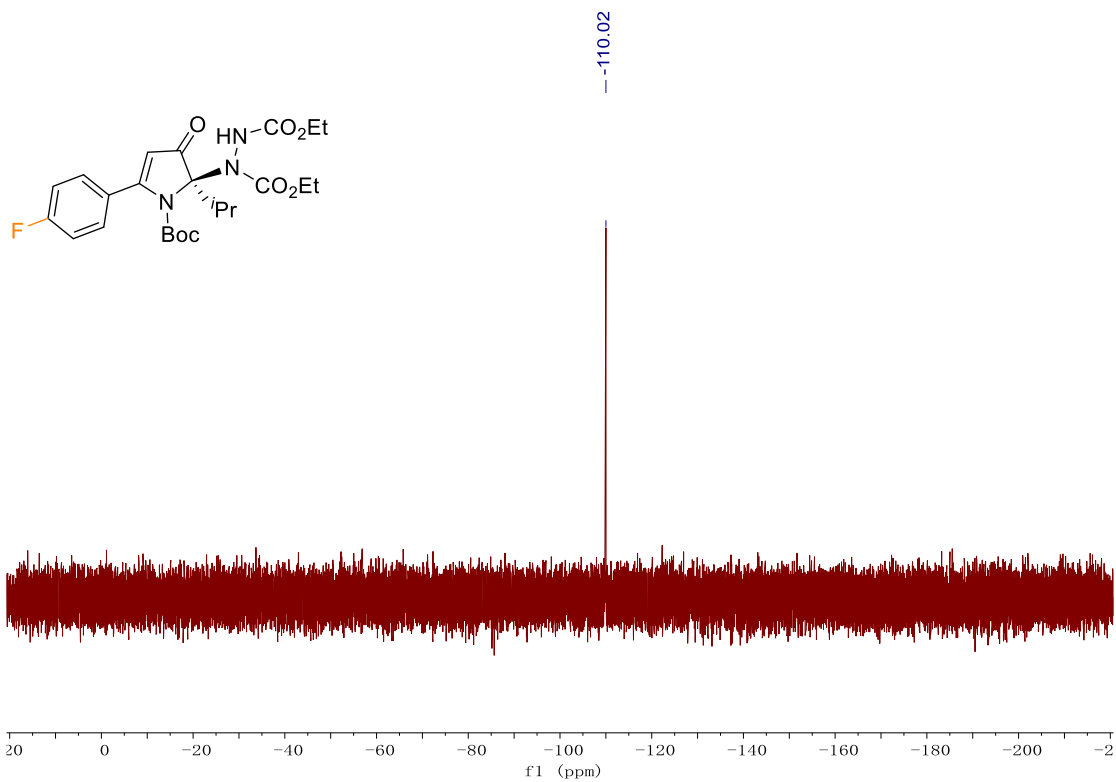

**diethyl (R)-1-(1-(tert-butoxycarbonyl)-2-isopropyl-3-oxo-5-(m-tolyl)-2,3-dihydro-1H-pyrrol-2-yl)hydrazine-1,2-dicarboxylate (3g)**

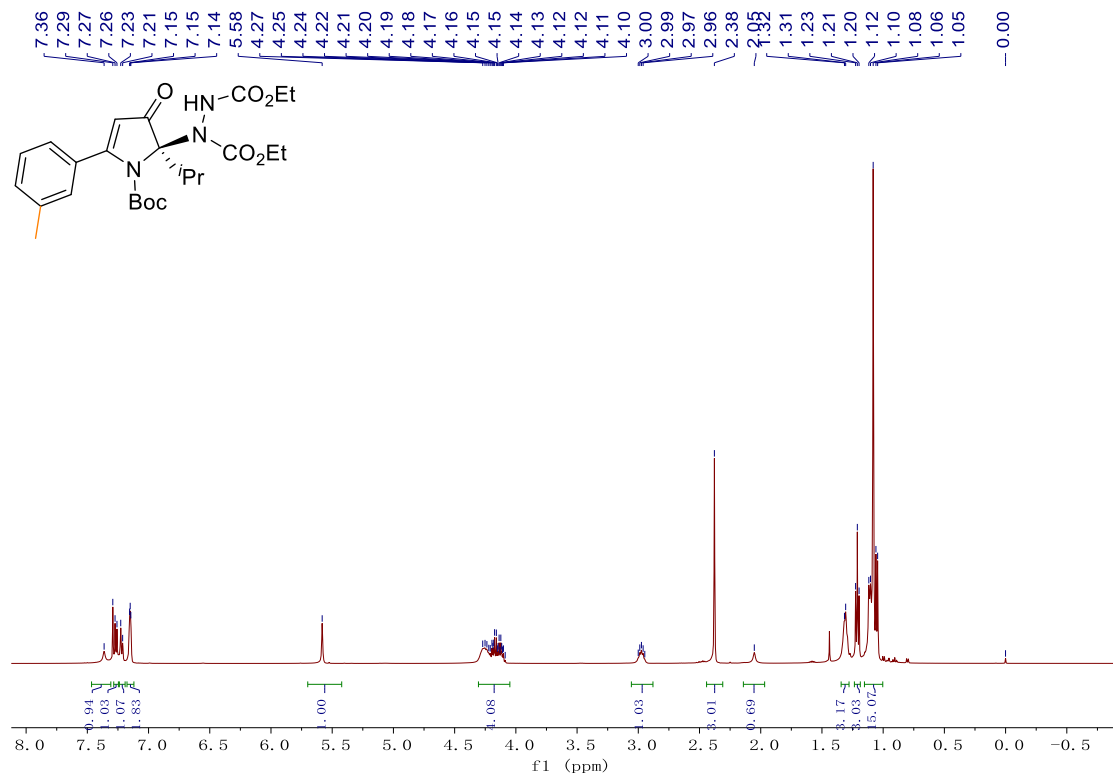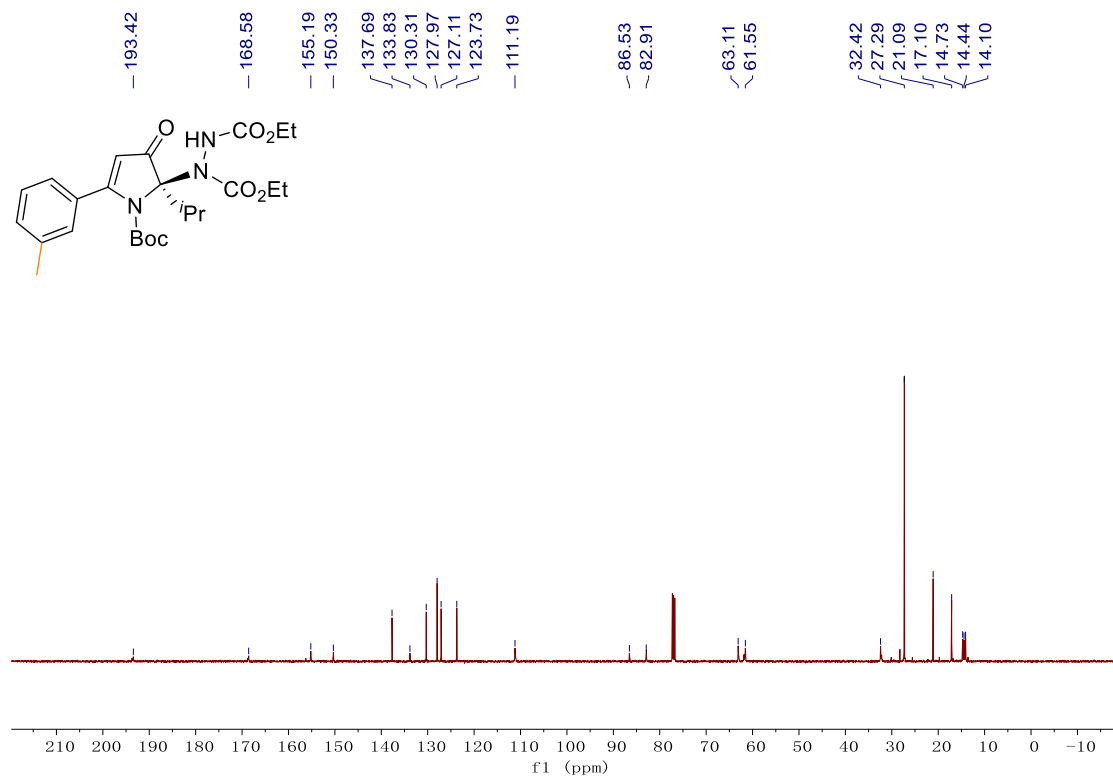



**diethyl (*R*)-1-(1-(tert-butoxycarbonyl)-5-(3-chlorophenyl)-2-isopropyl-3-oxo-2,3-dihydro-1H-pyrrol-2-yl)hydrazine-1,2-dicarboxylate (**3h**)**

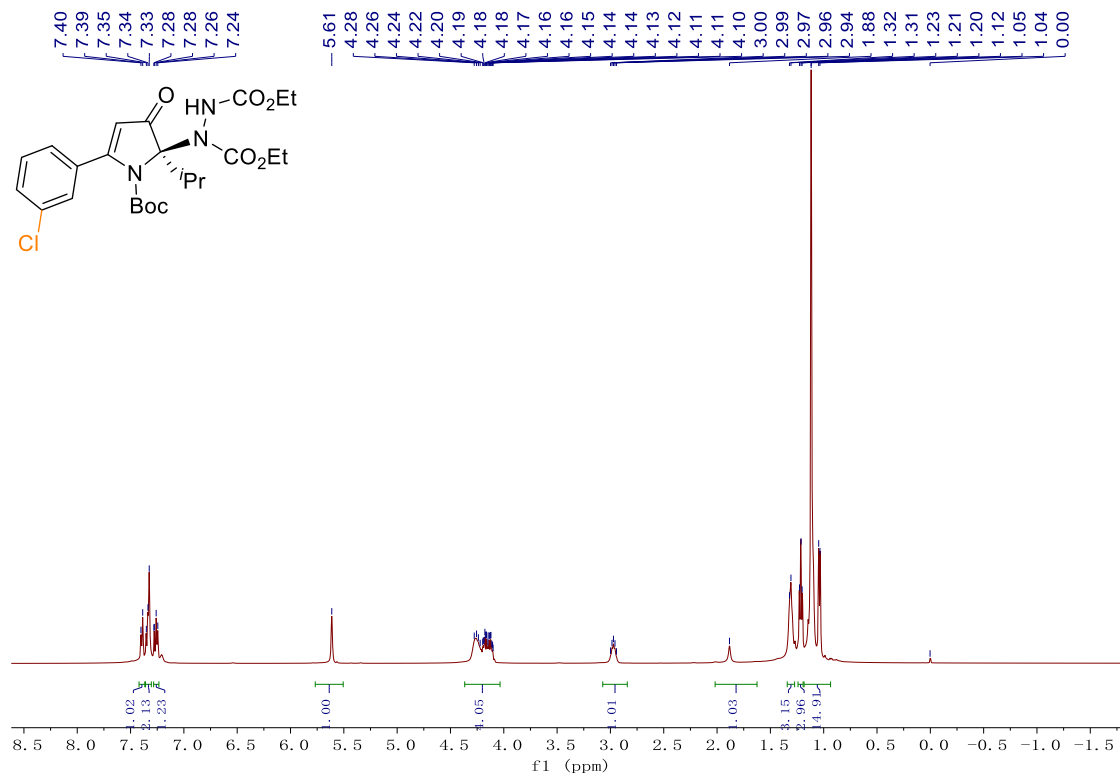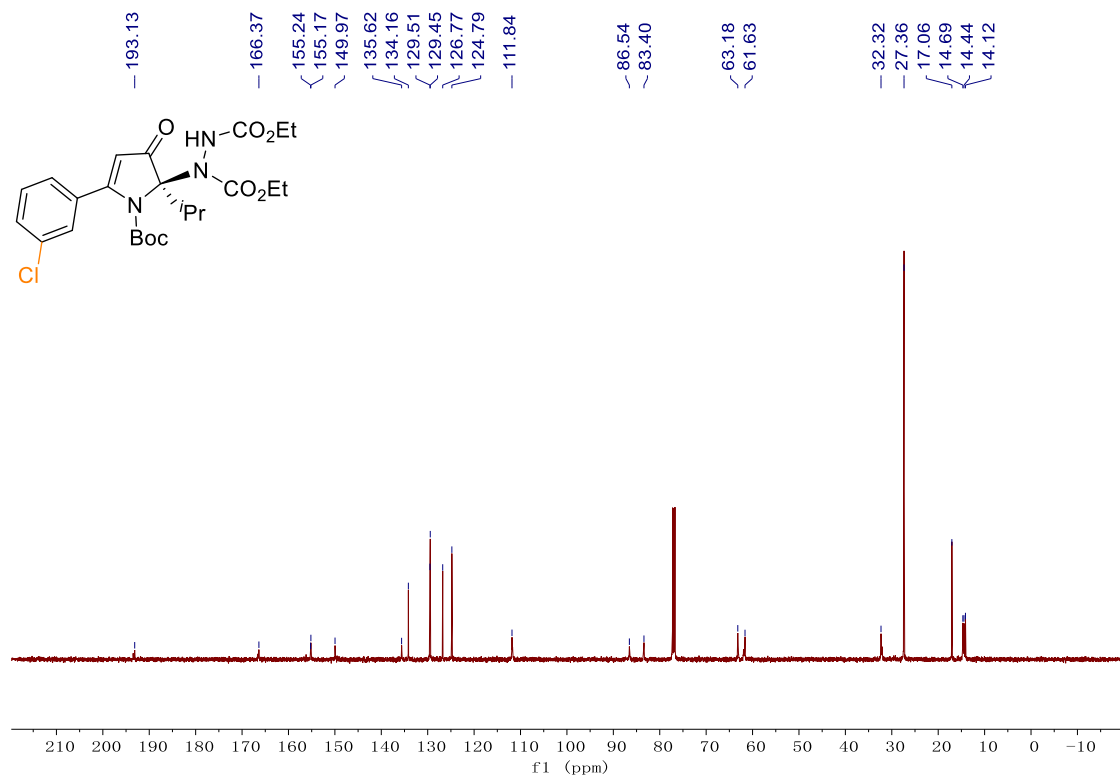

**diethyl (R)-1-(1-(tert-butoxycarbonyl)-2-isopropyl-3-oxo-5-(o-tolyl)-2,3-dihydro-1H-pyrrol-2-yl)hydrazine-1,2-dicarboxylate (3i)**

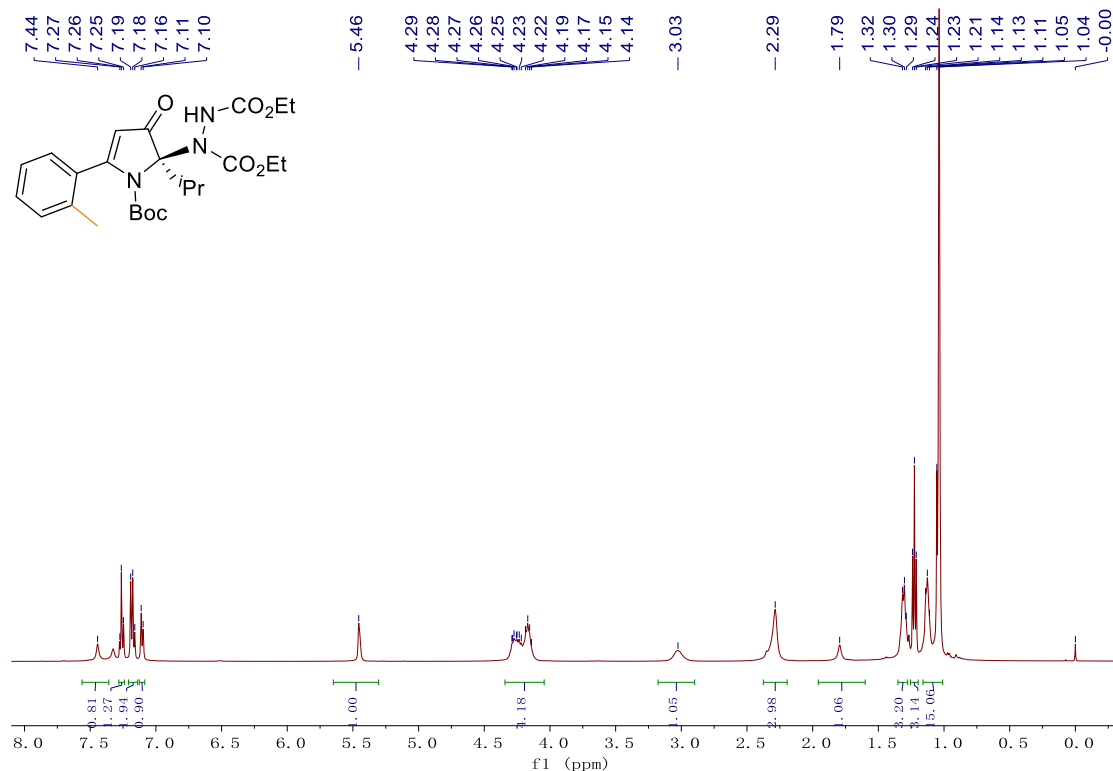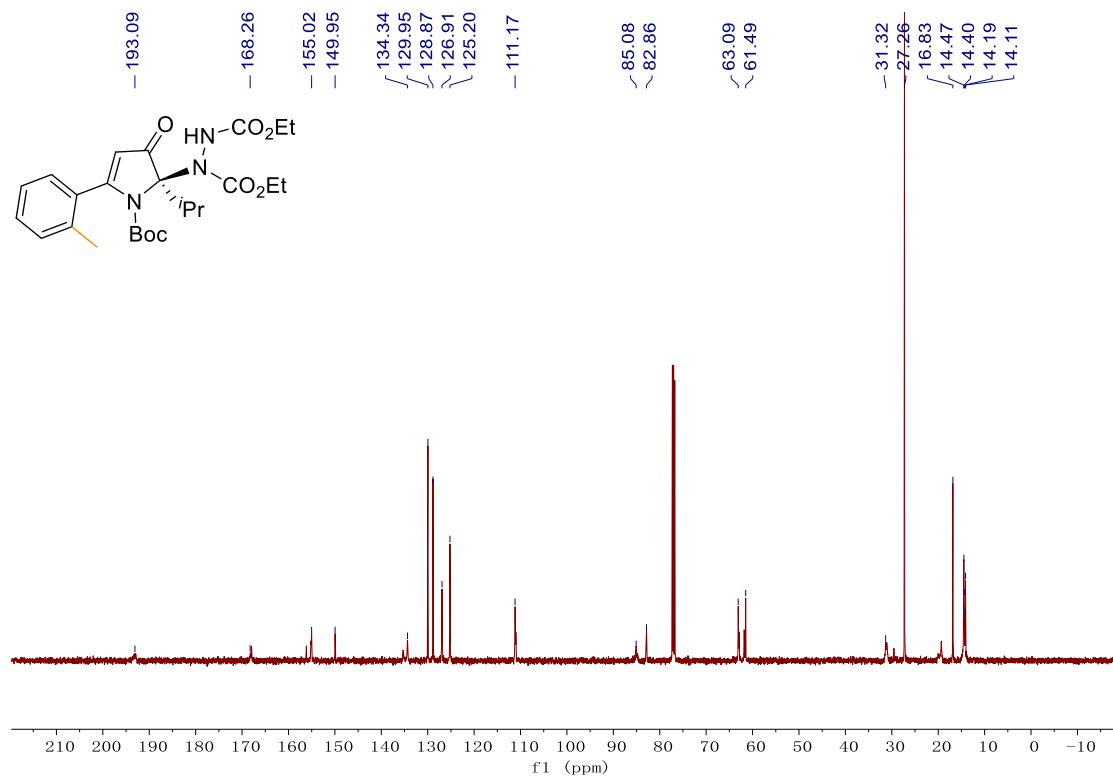

diethyl (*R*)-1-(1-(tert-butoxycarbonyl)-2-methyl-3-oxo-5-phenyl-2,3-dihydro-1H-pyrrol-2-yl)hydrazine-1,2-dicarboxylate (**3j**)

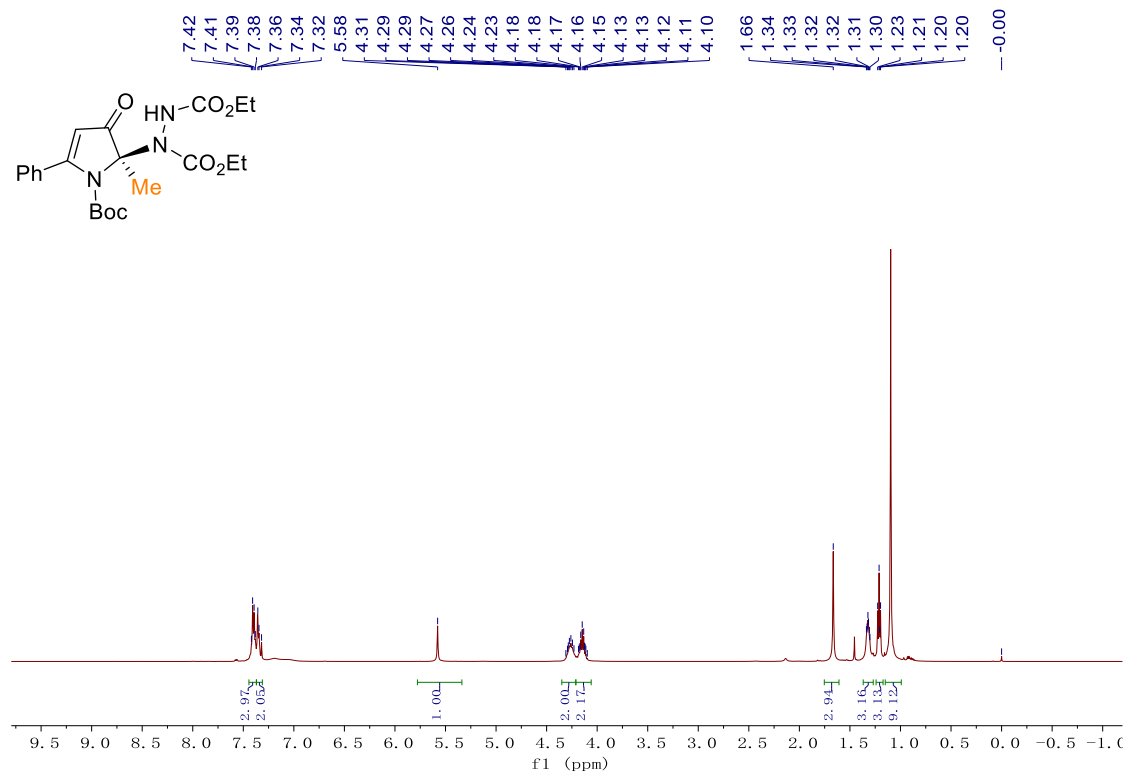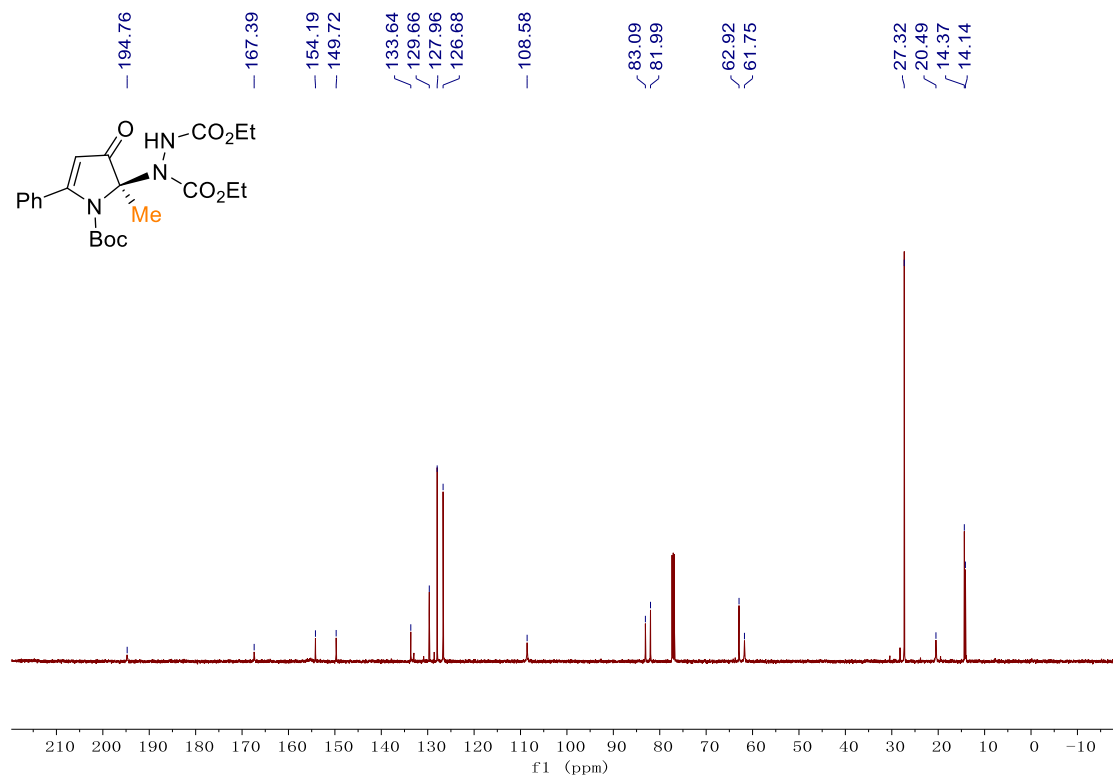

diisopropyl (R)-1-(1-(tert-butoxycarbonyl)-2-methyl-3-oxo-5-phenyl-2,3-dihydro-1H-pyrrol-2-yl)hydrazine-1,2-dicarboxylate (3k)

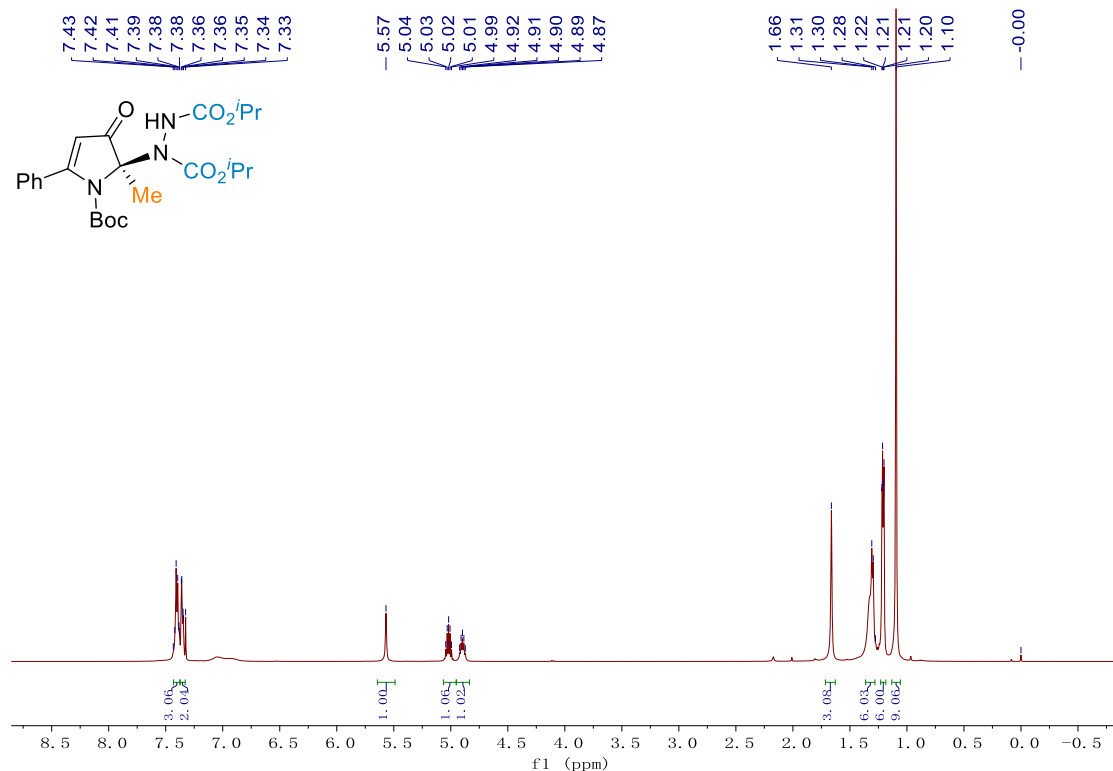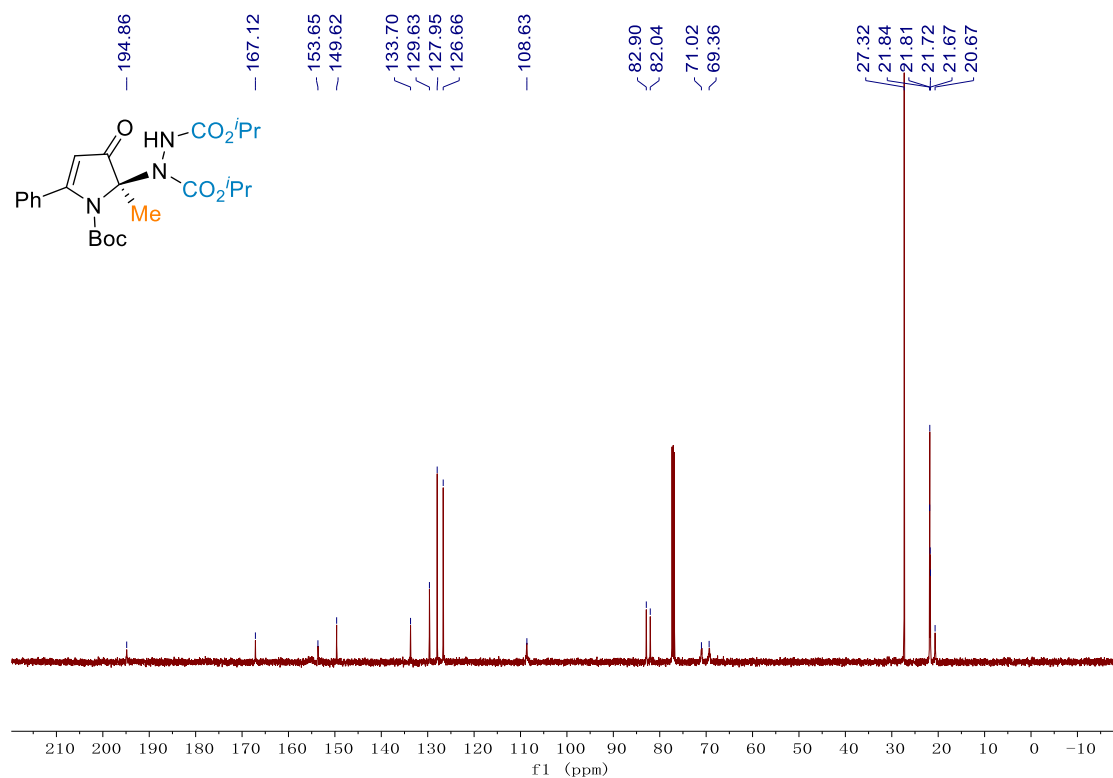

diethyl (*R*)-1-(2-benzyl-1-(tert-butoxycarbonyl)-3-oxo-5-phenyl-2,3-dihydro-1H-pyrrol-2-yl)hydrazine-1,2-dicarboxylate (3l)

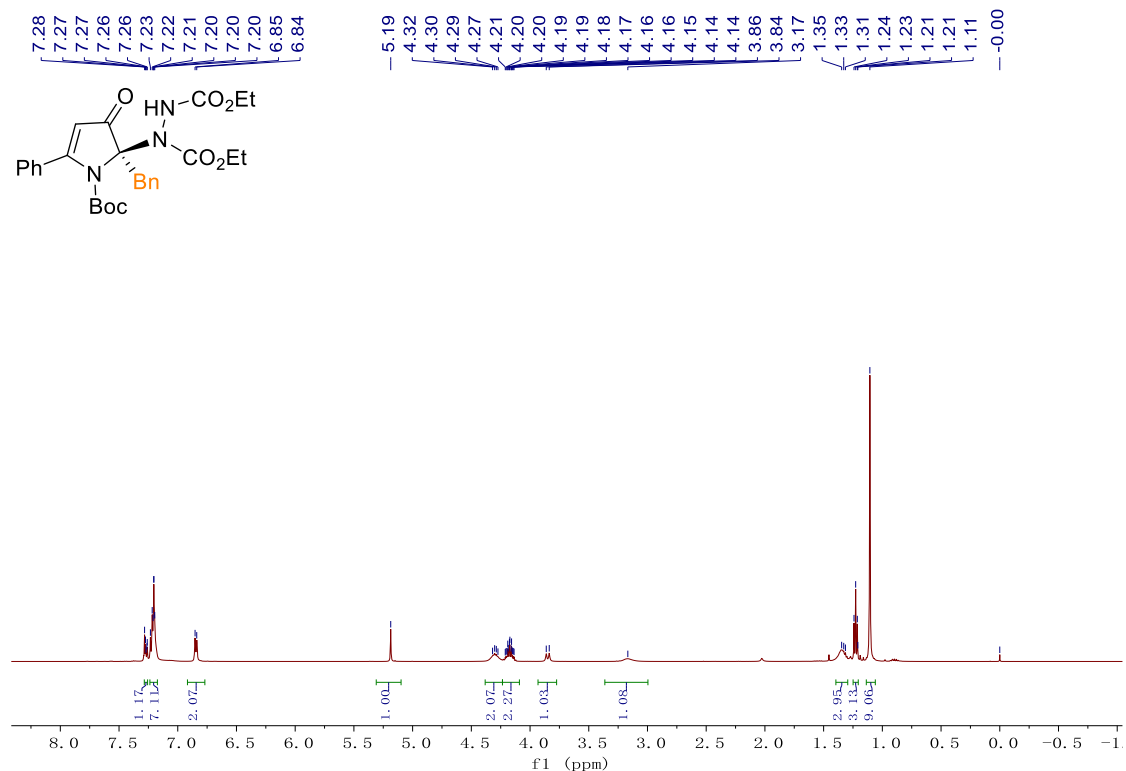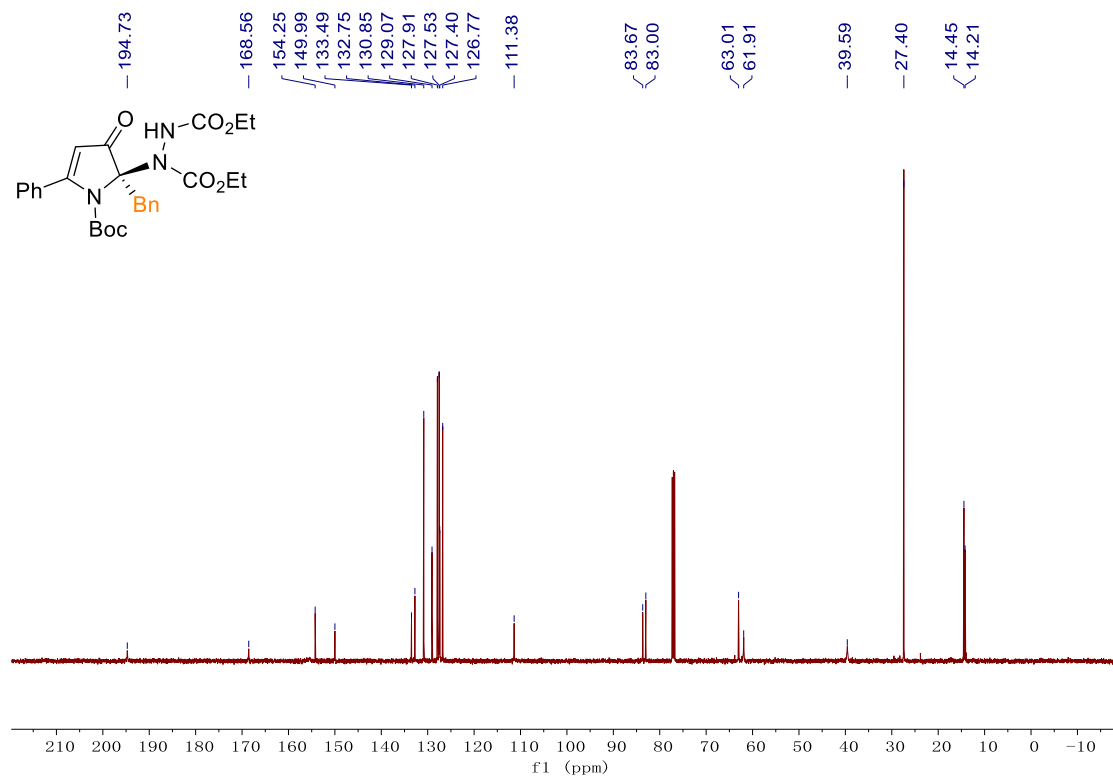

**diisopropyl (R)-1-(1-(tert-butoxycarbonyl)-3-oxo-2,5-diphenyl-2,3-dihydro-1H-pyrrol-2-yl)hydrazine-1,2-dicarboxylate (3m)**

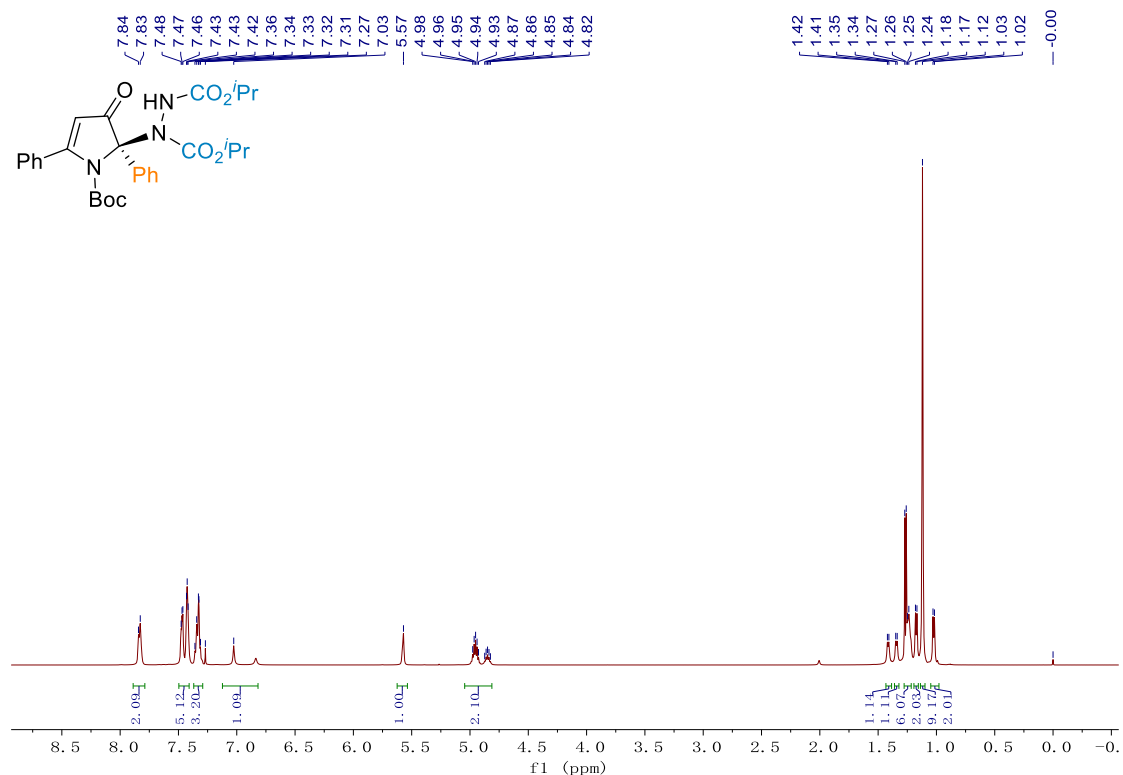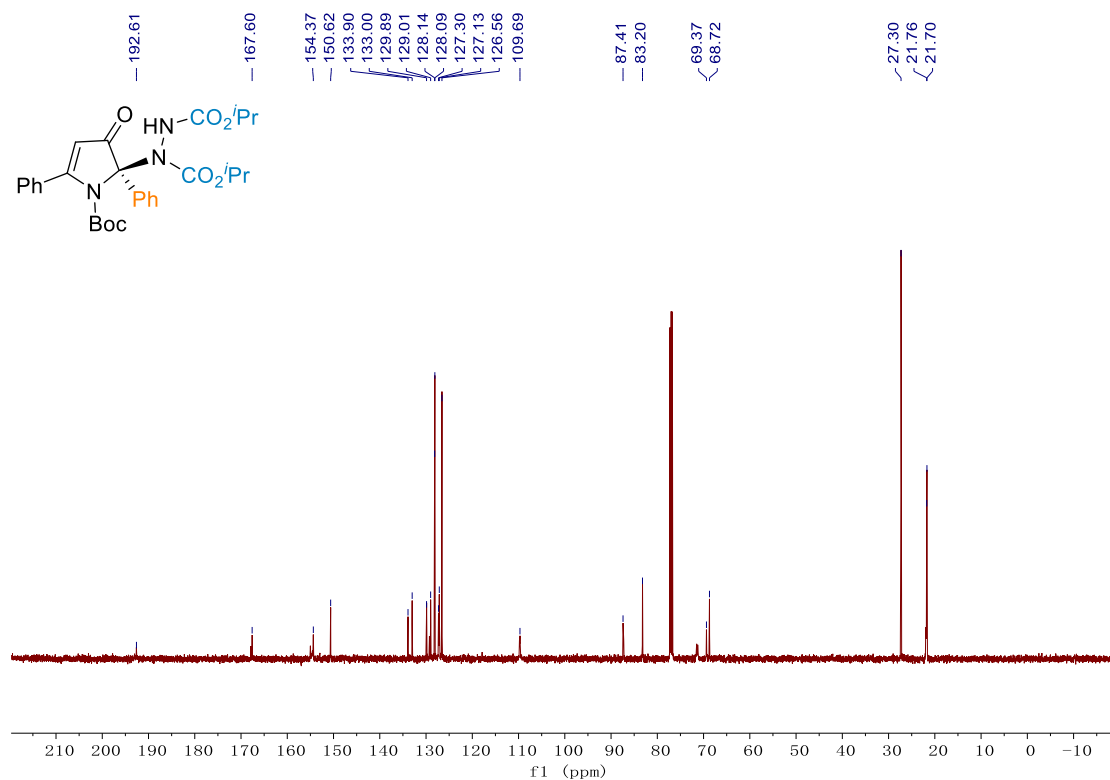

**diethyl (*R*)-1-(1-(tert-butoxycarbonyl)-5-(4-ethylphenyl)-2-isopropyl-3-oxo-2,3-dihydro-1H-pyrrol-2-yl)hydrazine-1,2-dicarboxylate (S3o)**

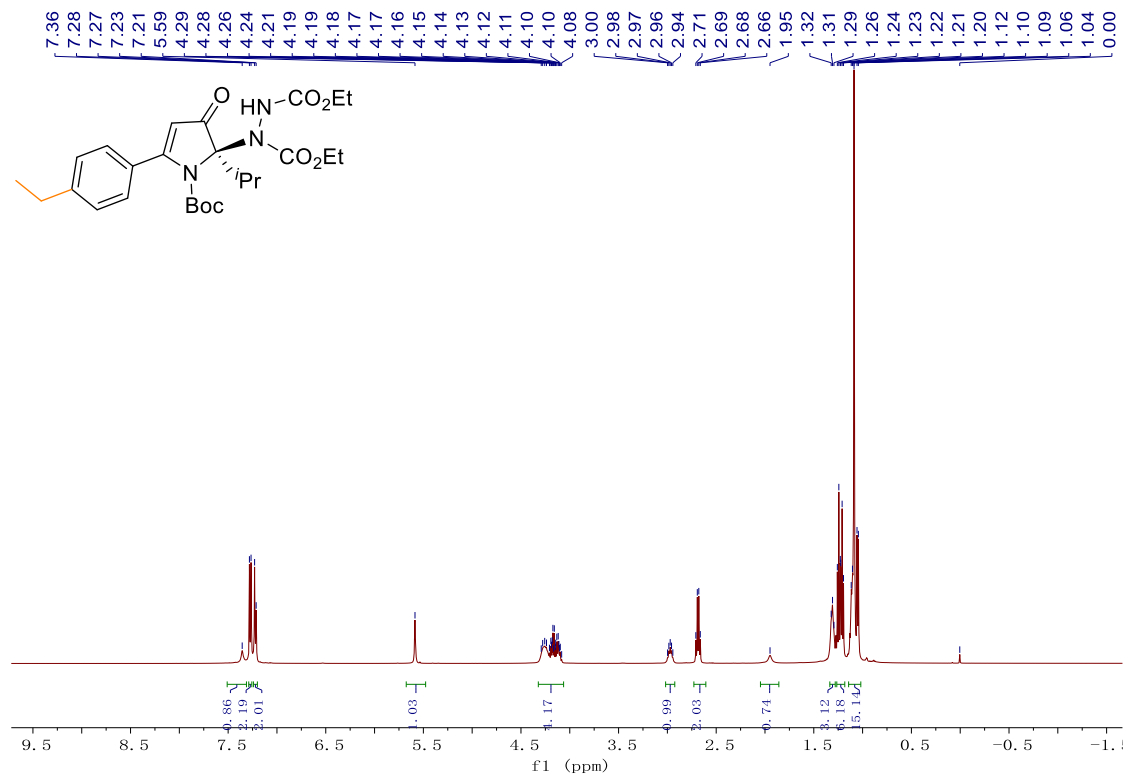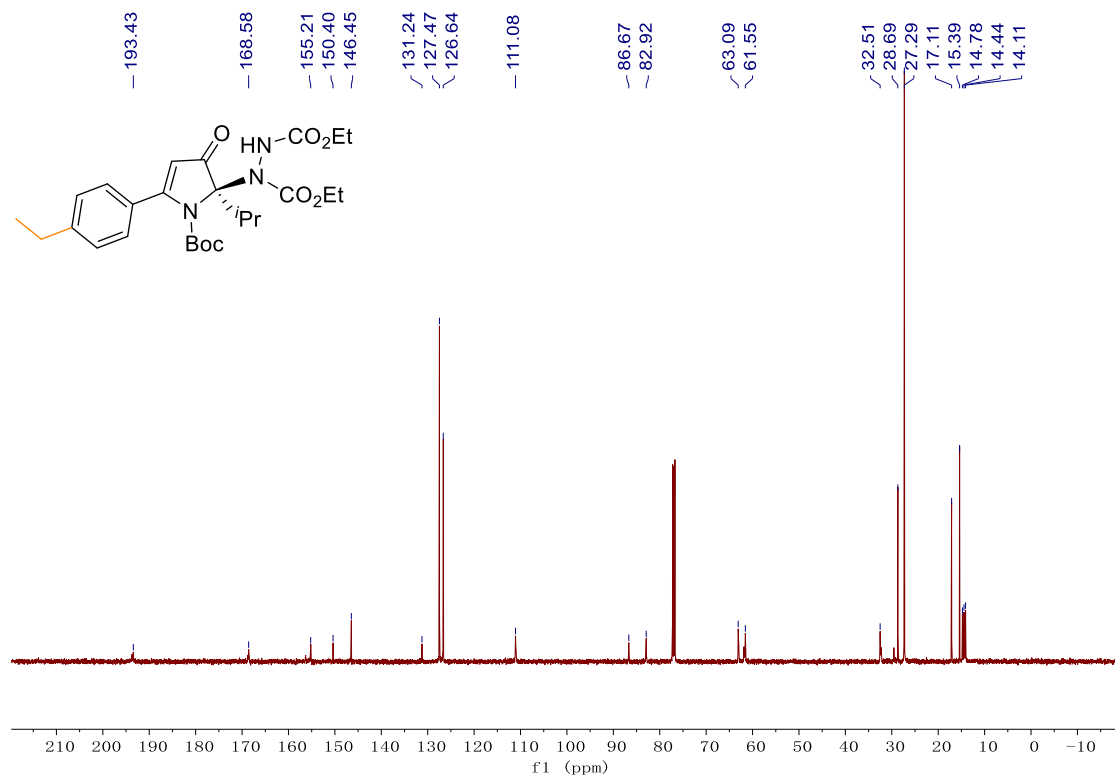

**diethyl (R)-1-(1-(tert-butoxycarbonyl)-5-(4-butylphenyl)-2-isopropyl-3-oxo-2,3-dihydro-1H-pyrrol-2-yl)hydrazine-1,2-dicarboxylate (S3p)**

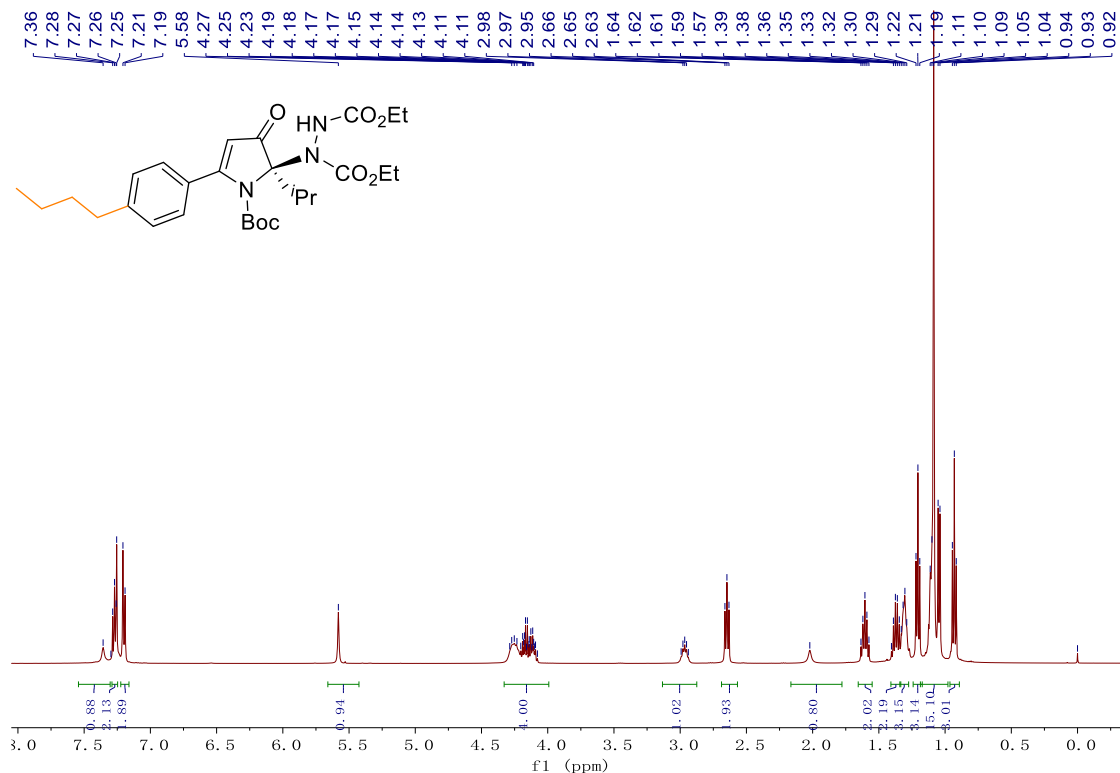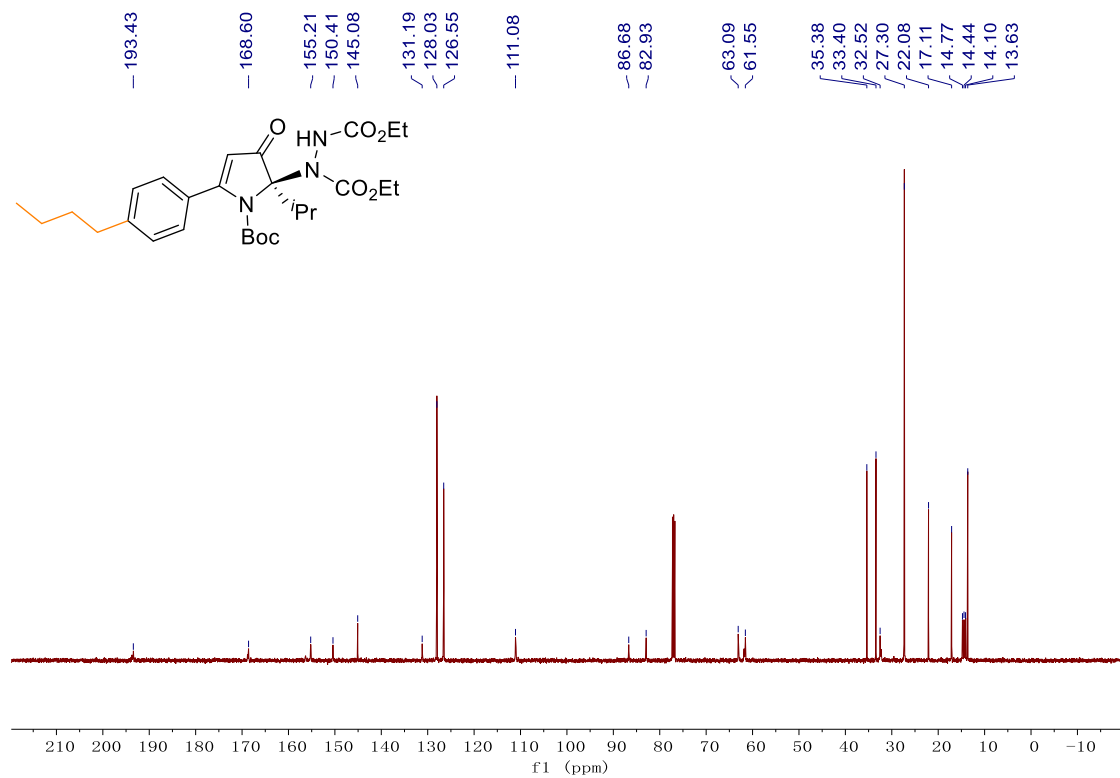



**diethyl (R)-1-(1-(tert-butoxycarbonyl)-5-(4-(tert-butyl)phenyl)-2-isopropyl-3-oxo-2,3-dihydro-1H-pyrrol-2-yl)hydrazine-1,2-dicarboxylate (S3q)**

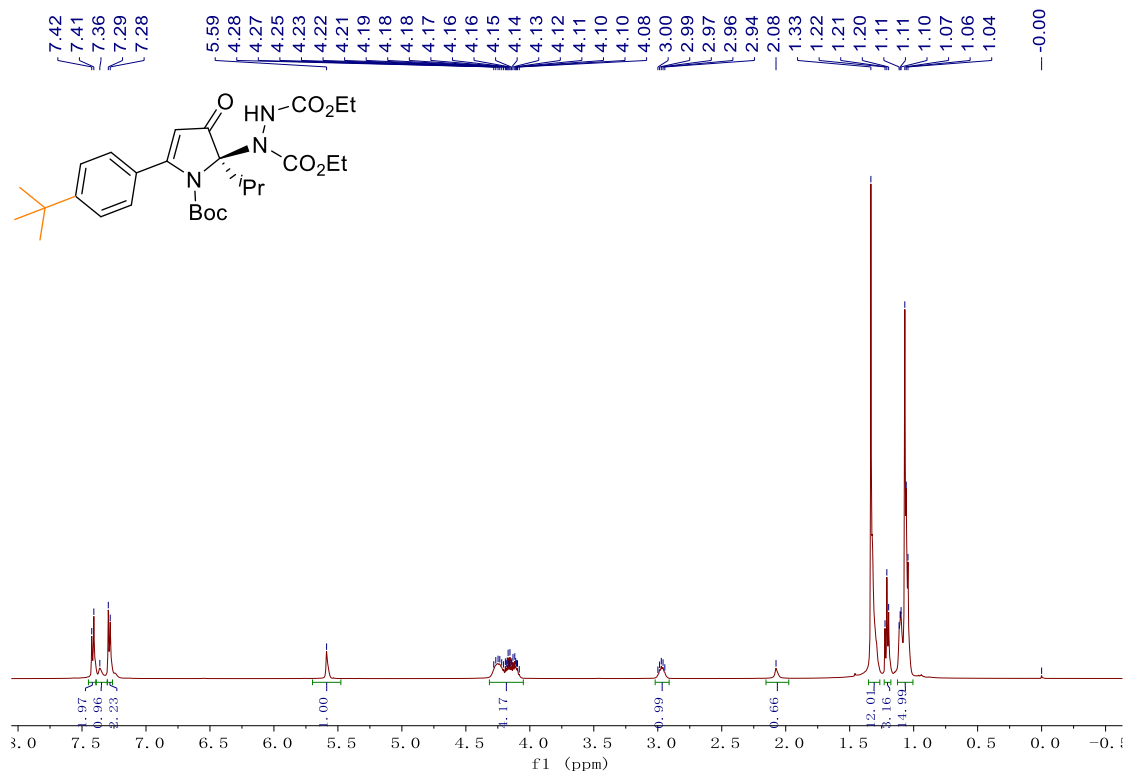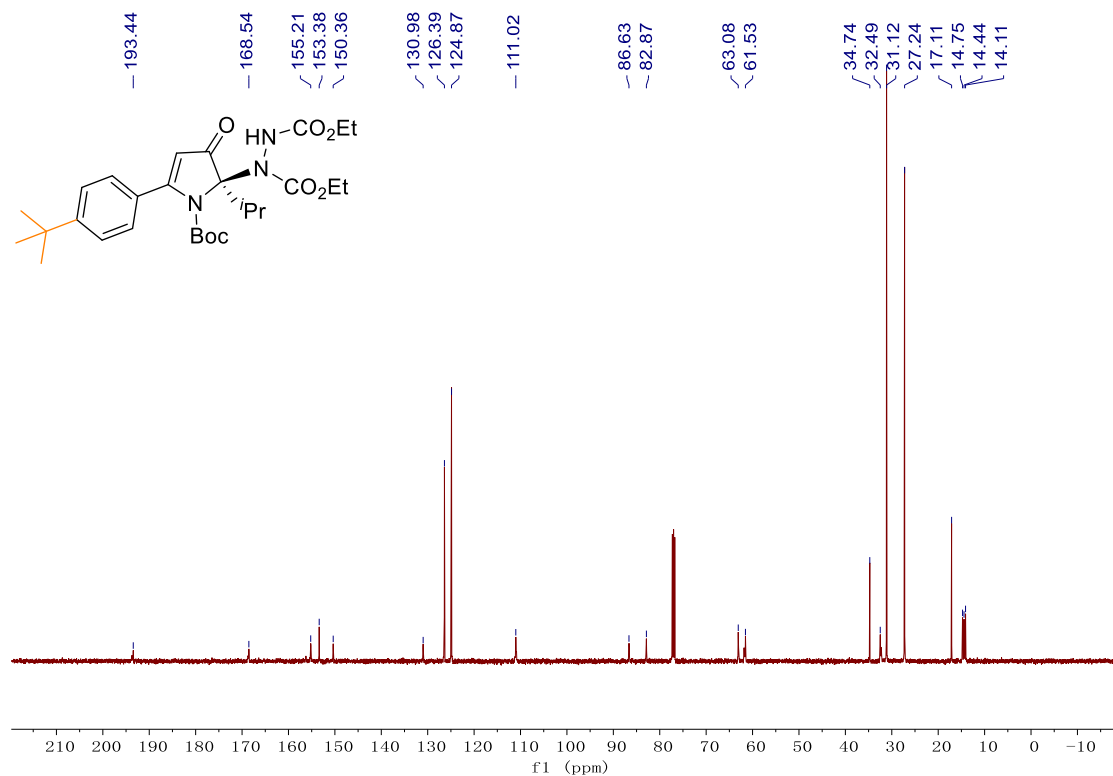

**diethyl (*R*)-1-(5-([1,1'-biphenyl]-4-yl)-1-(tert-butoxycarbonyl)-2-isopropyl-3-oxo-2,3-dihydro-1H-pyrrol-2-yl)hydrazine-1,2-dicarboxylate (S3r)**

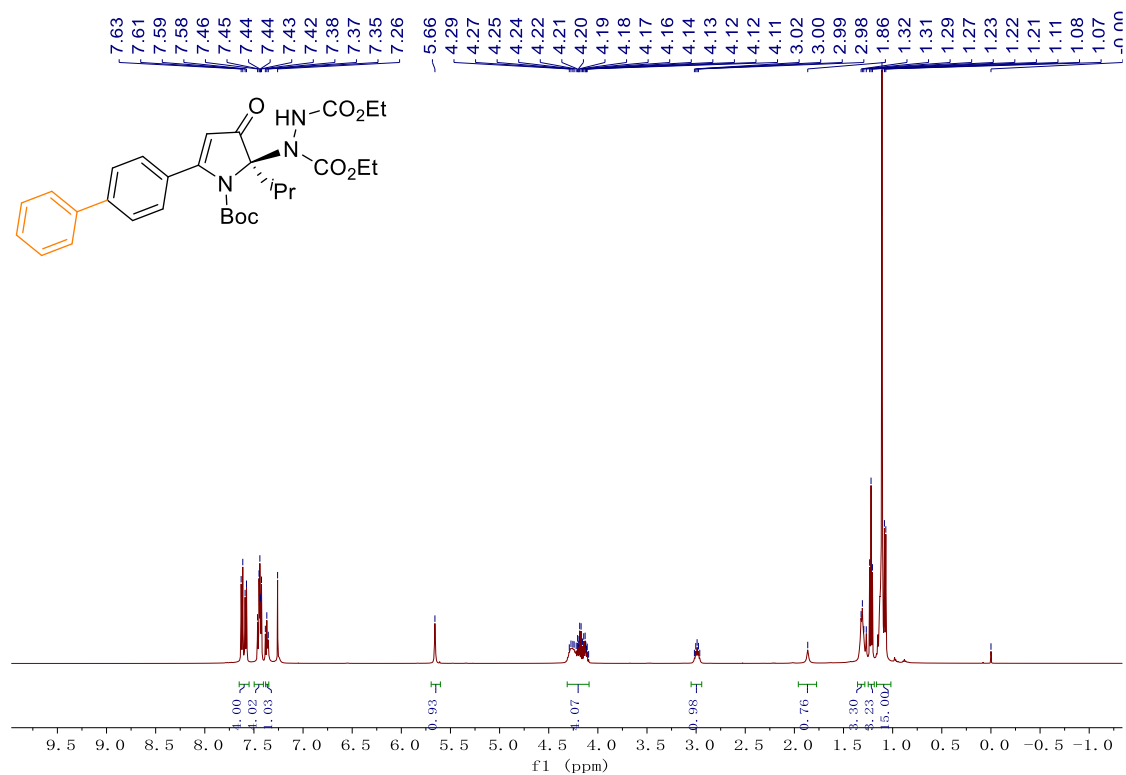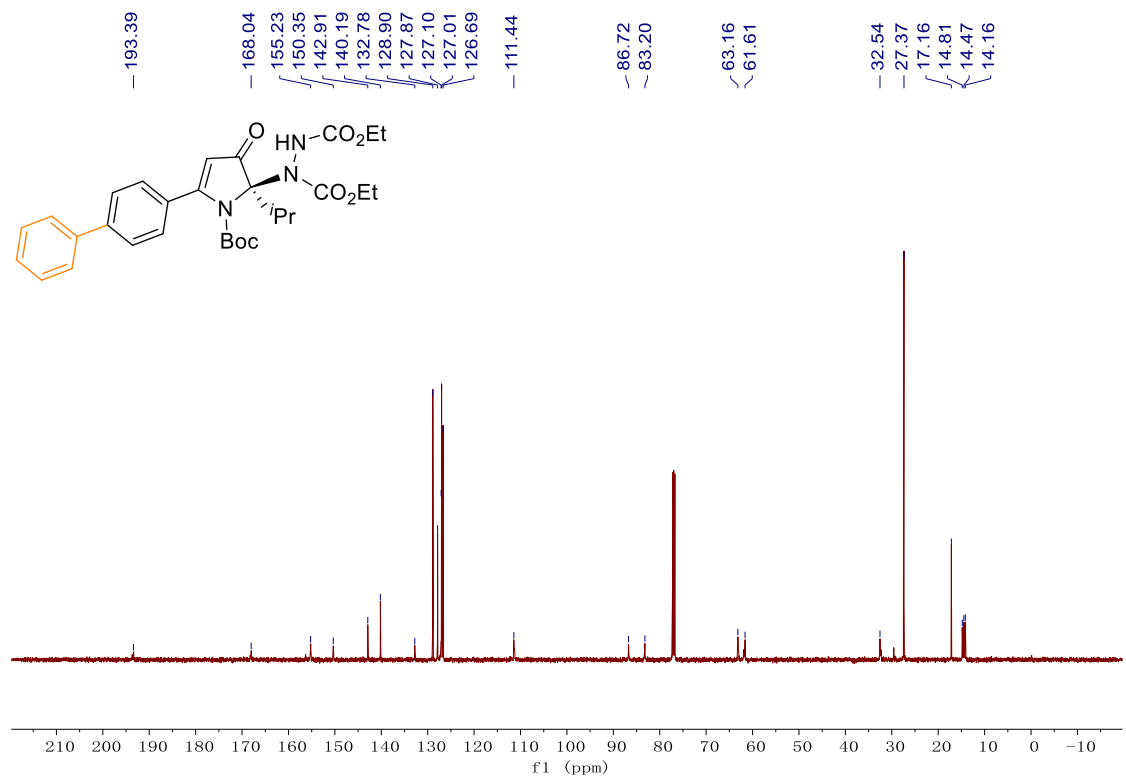

**diethyl (R)-1-(1-(tert-butoxycarbonyl)-5-(4'-ethyl-[1,1'-biphenyl]-4-yl)-2-isopropyl-3-oxo-2,3-dihydro-1H-pyrrol-2-yl)hydrazine-1,2-dicarboxylate (S3s)**

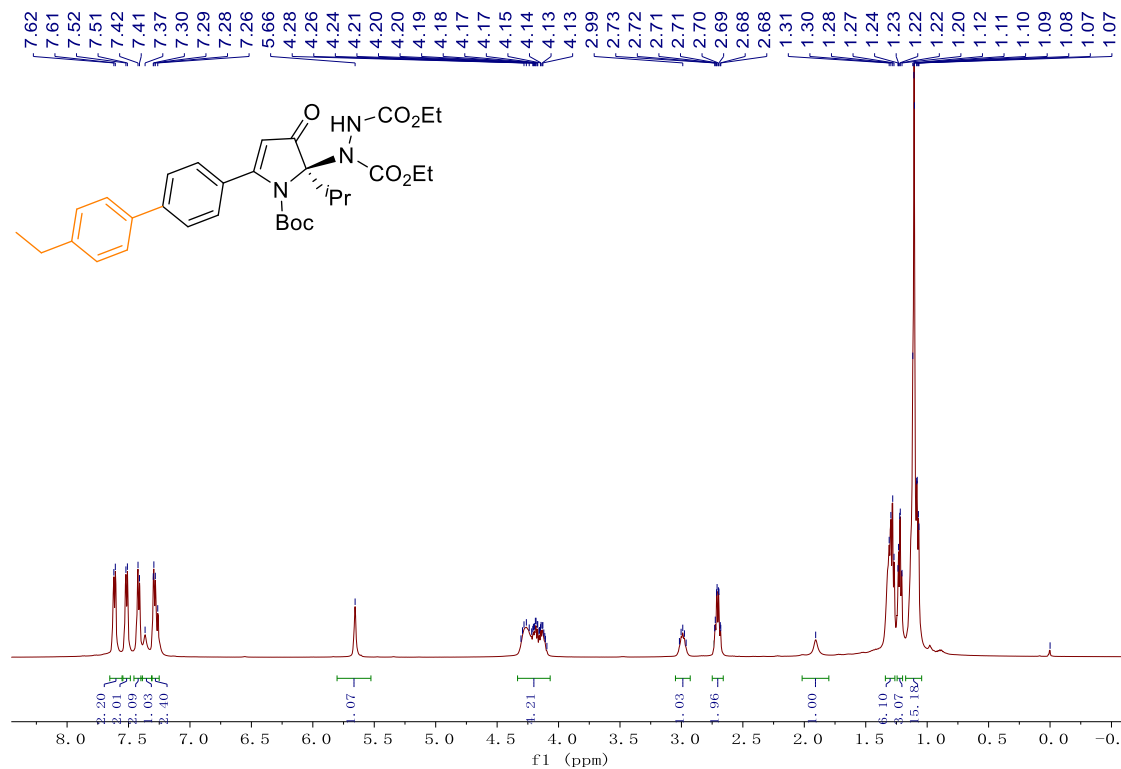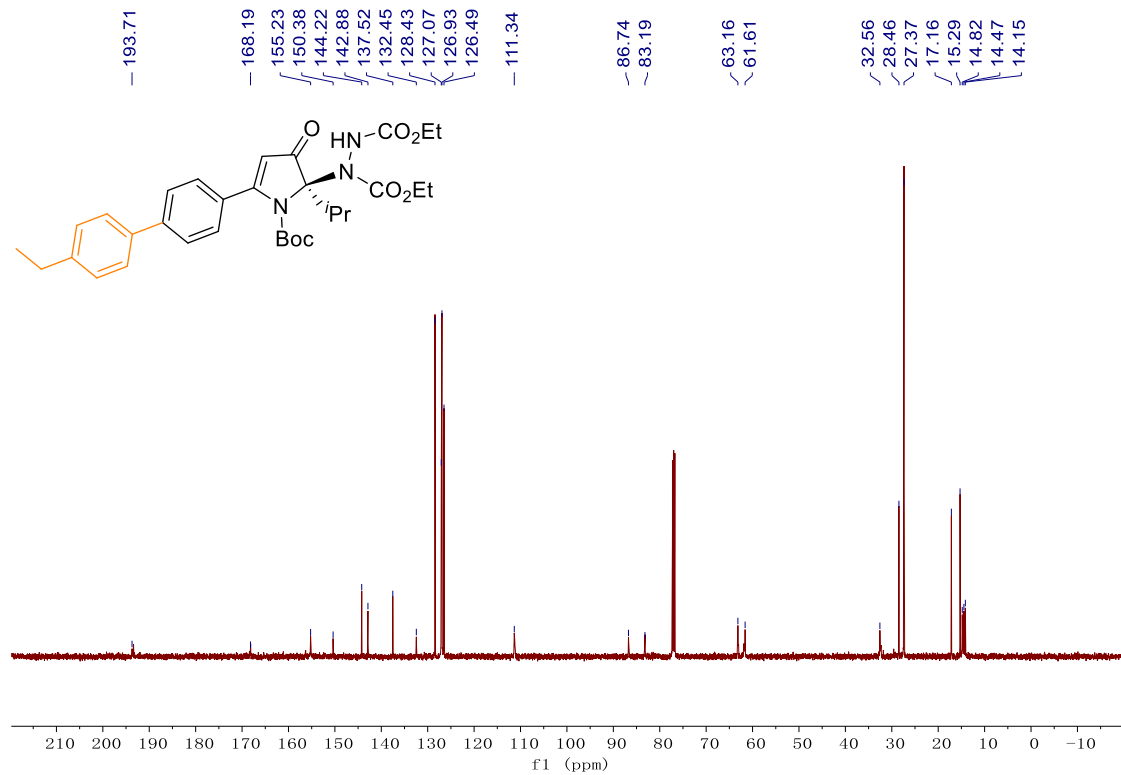

**diethyl (R)-1-(1-(tert-butoxycarbonyl)-5-(4-ethoxyphenyl)-2-isopropyl-3-oxo-2,3-dihydro-1H-pyrrol-2-yl)hydrazine-1,2-dicarboxylate (S3t)**

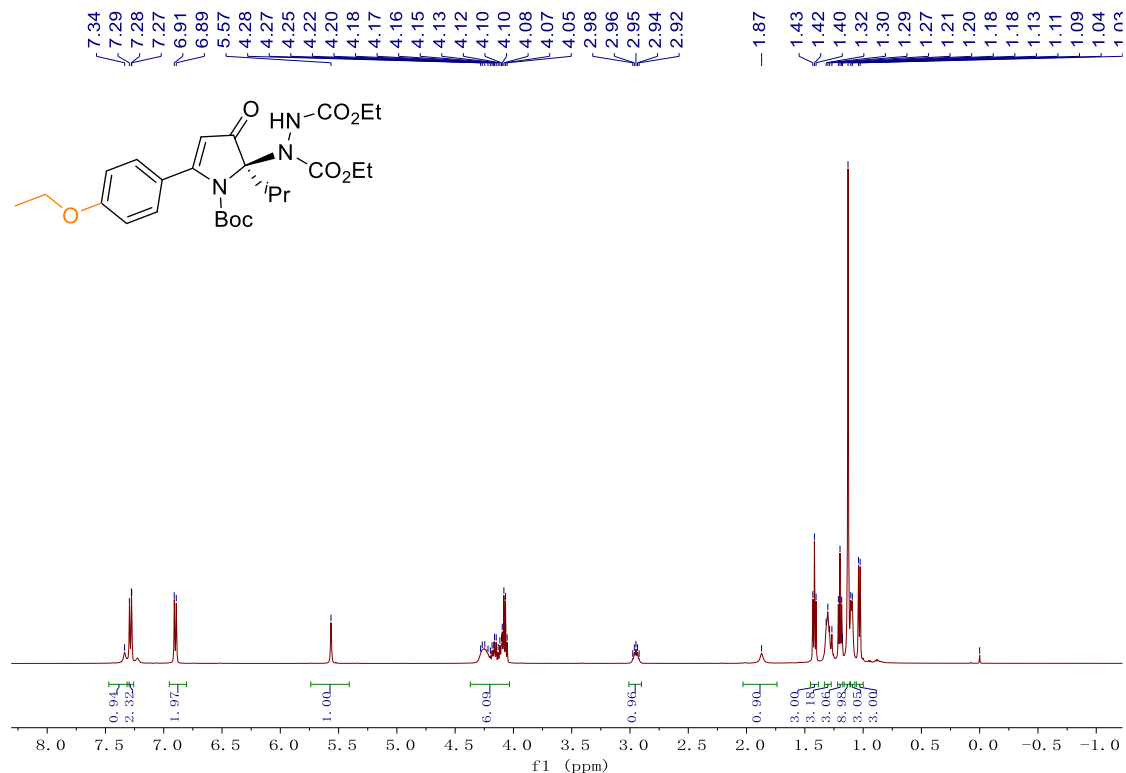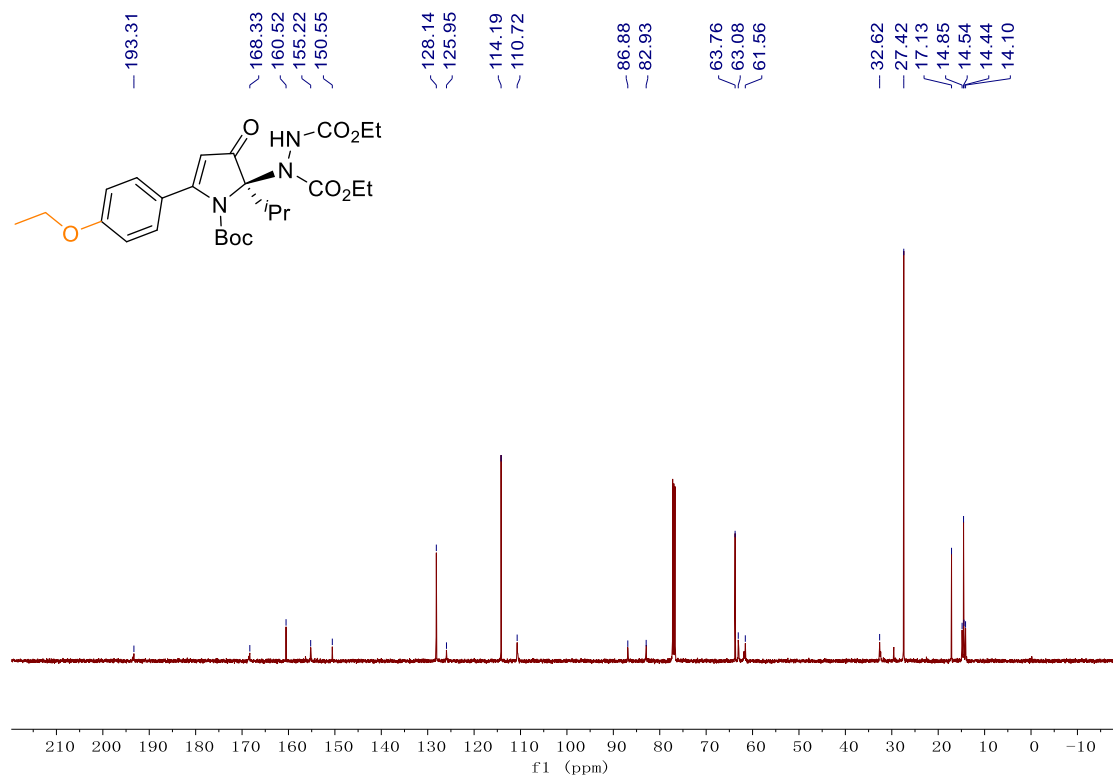

**diethyl (*R*)-1-(1-(tert-butoxycarbonyl)-2-isopropyl-3-oxo-5-(4-(trifluoromethyl)phenyl)-2,3-dihydro-1H-pyrrol-2-yl)hydrazine-1,2-dicarboxylate (S3u)**

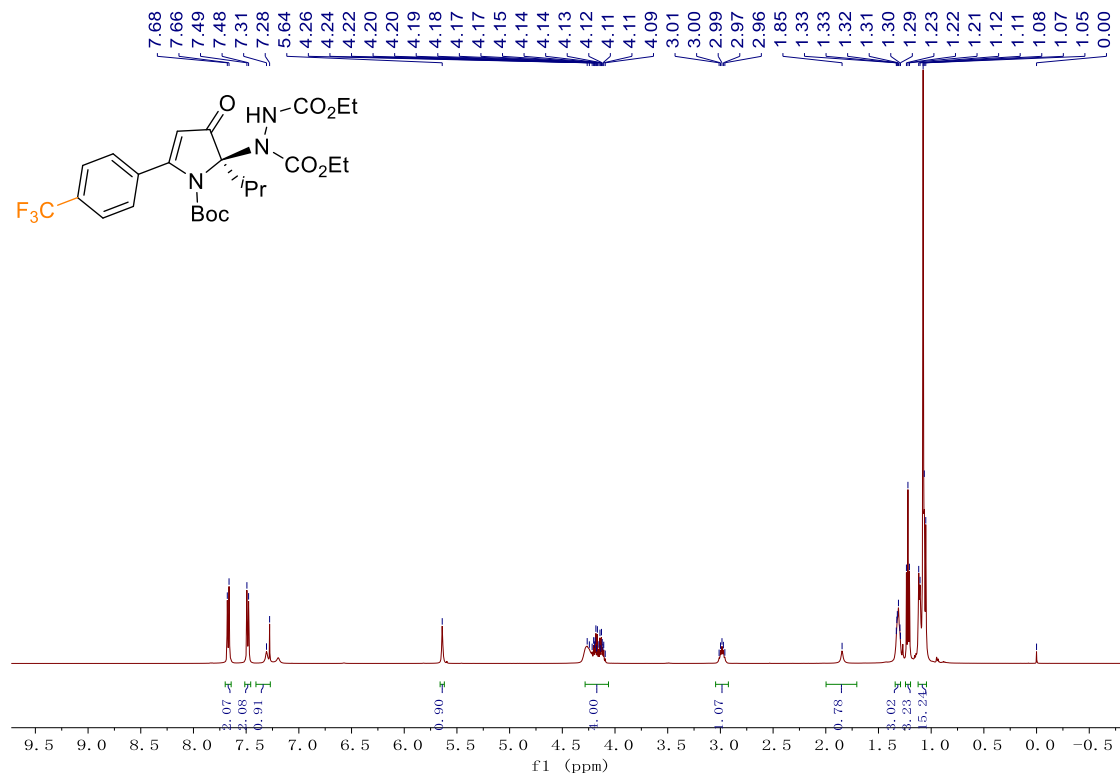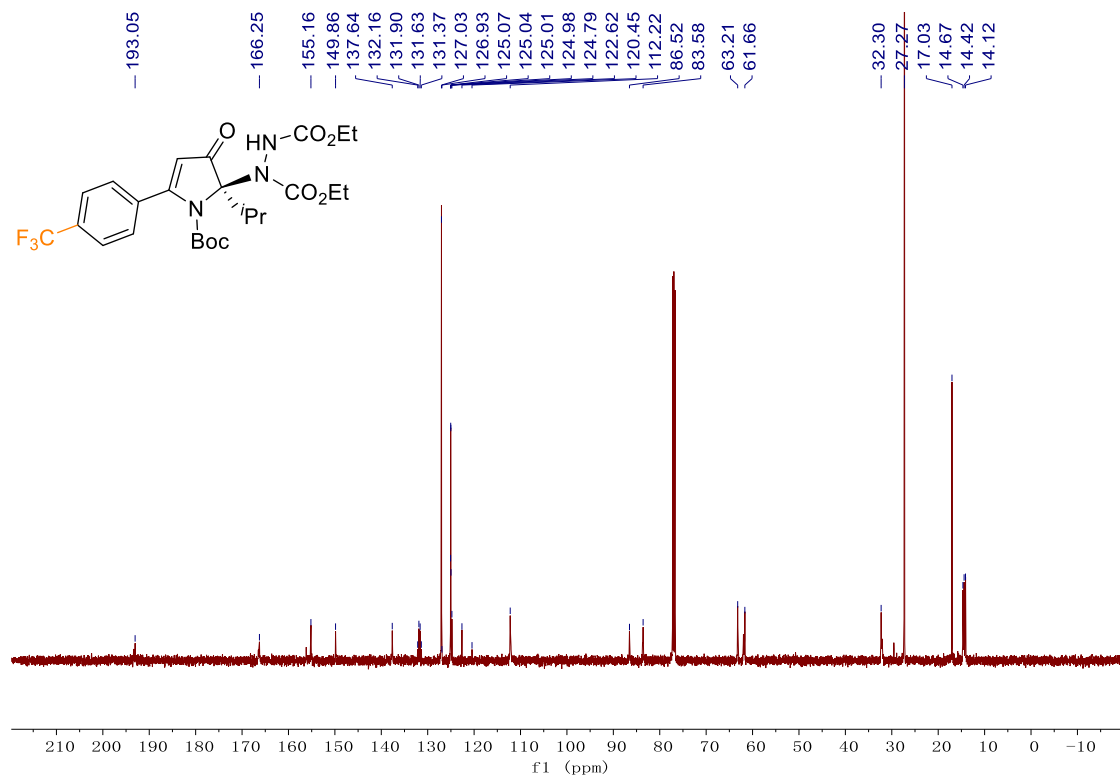

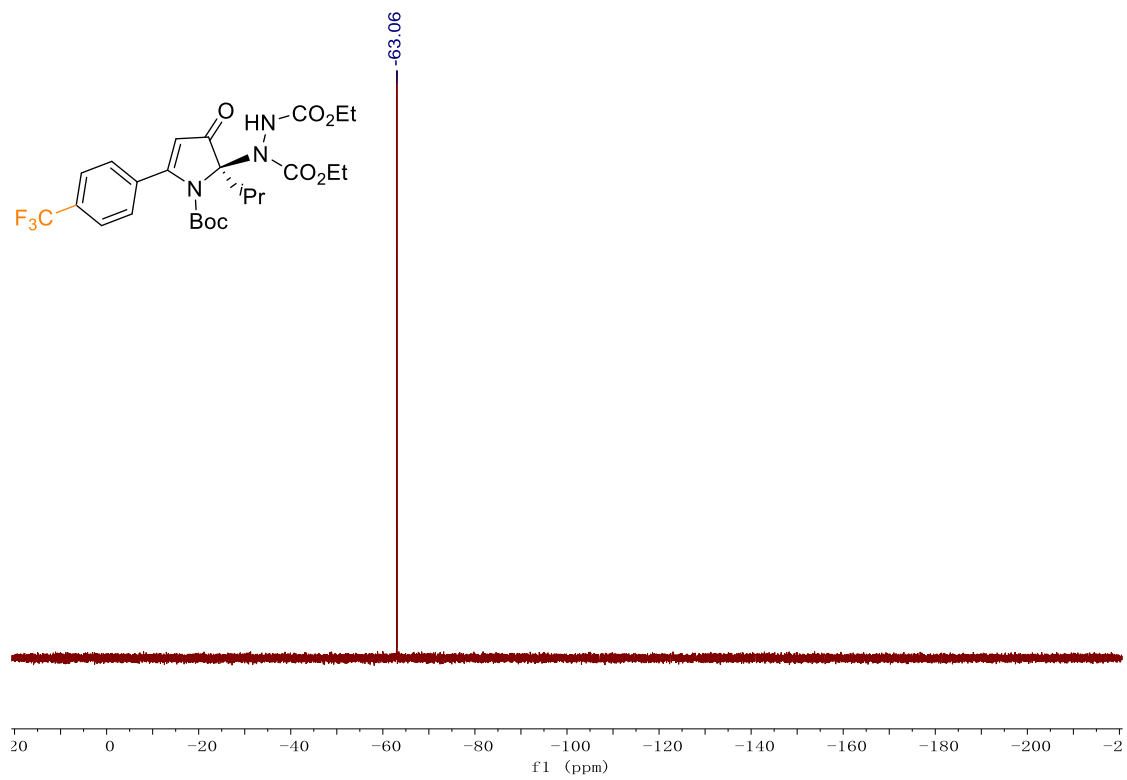

**diethyl (R)-1-(1-(tert-butoxycarbonyl)-5-(3-fluorophenyl)-2-isopropyl-3-oxo-2,3-dihydro-1H-pyrrol-2-yl)hydrazine-1,2-dicarboxylate (S3v)**

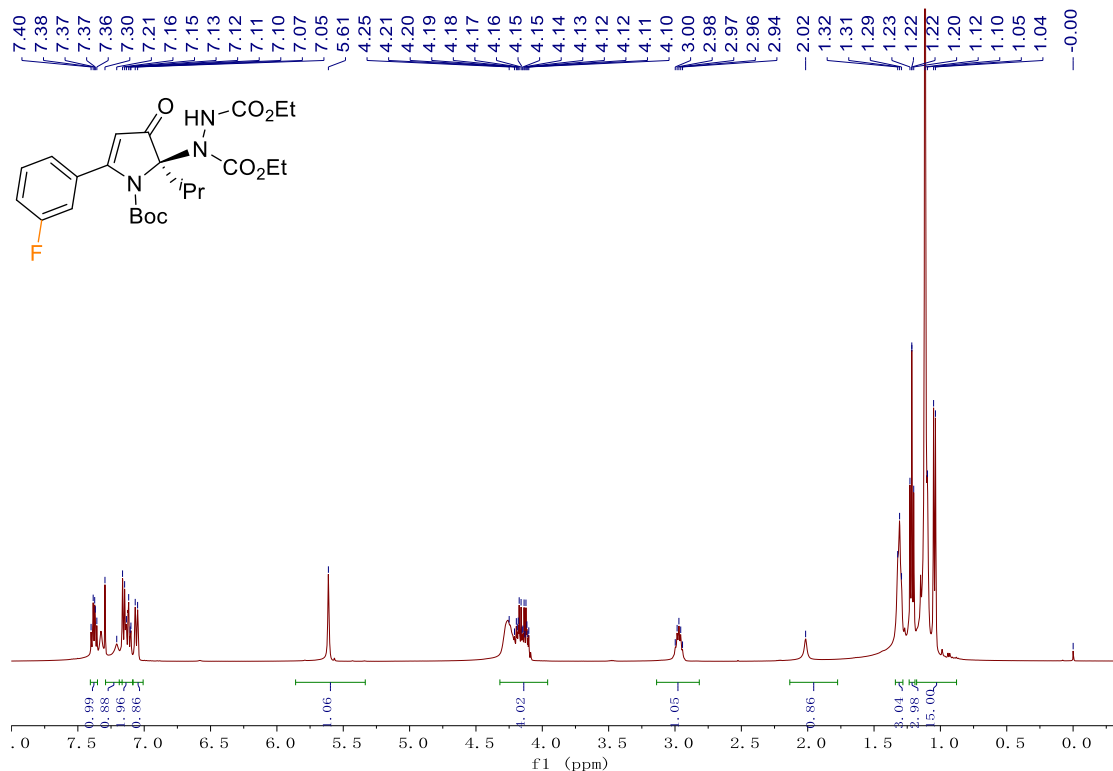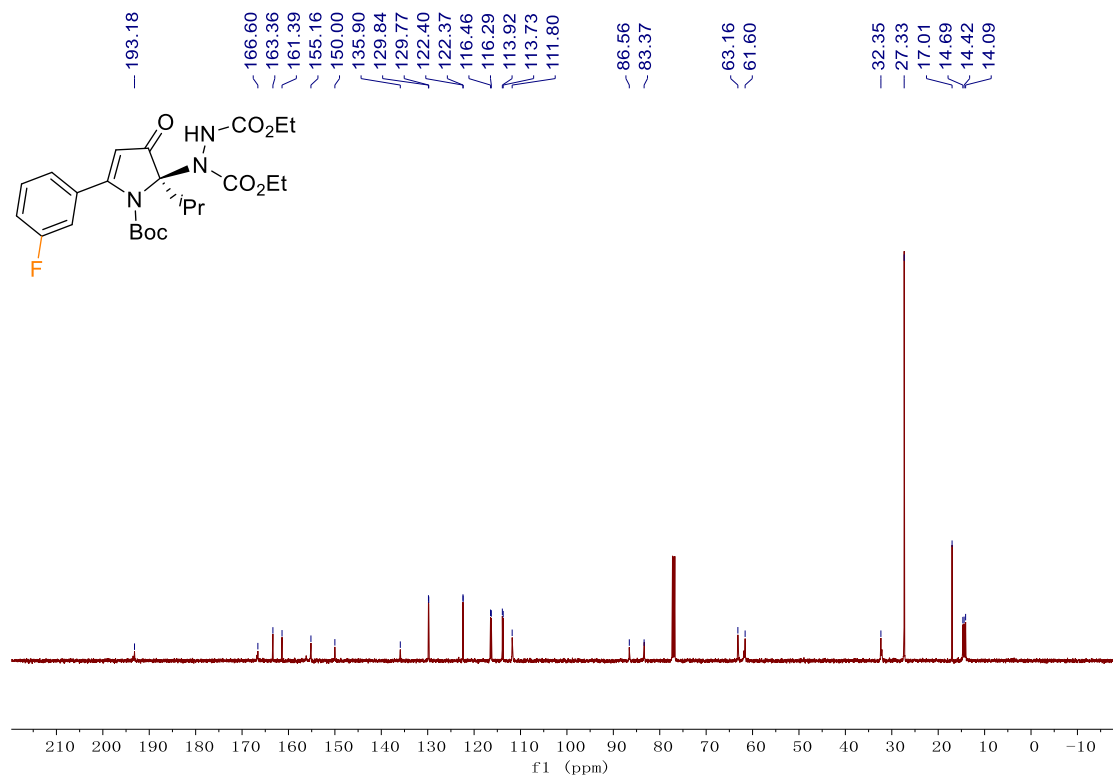

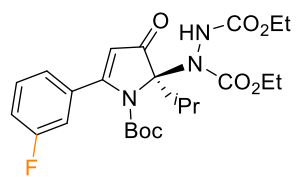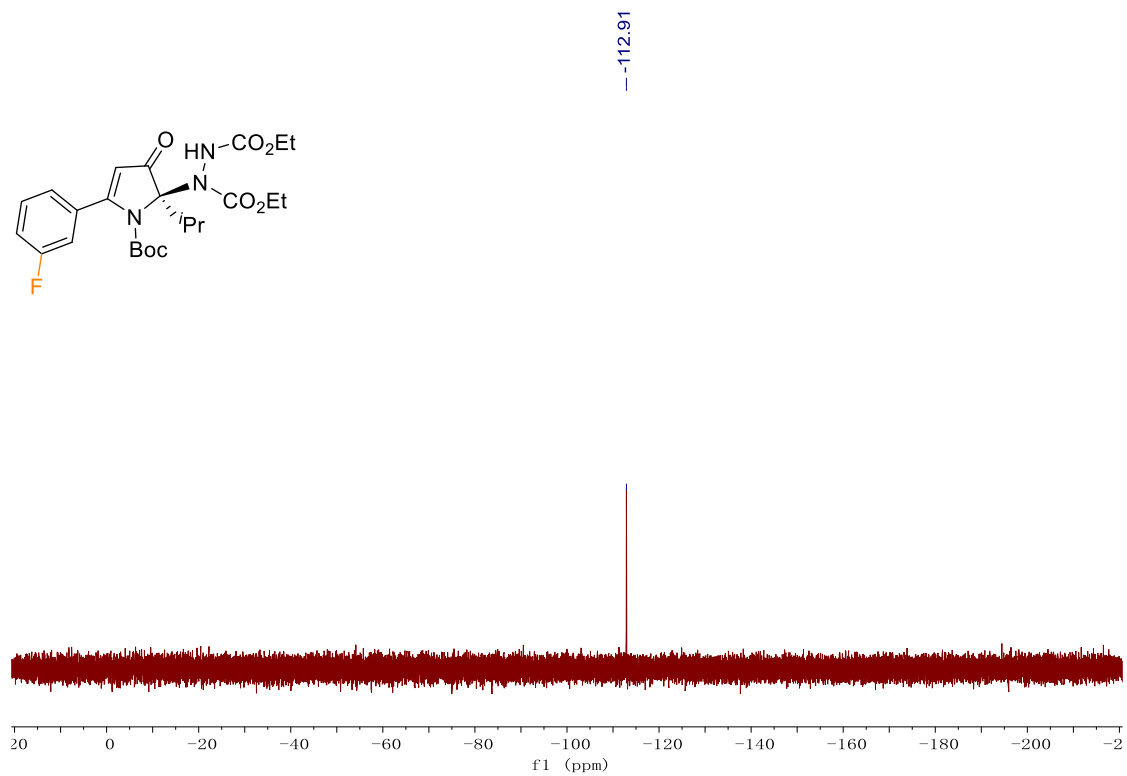



**diethyl (R)-1-(5-(3-bromophenyl)-1-(tert-butoxycarbonyl)-2-isopropyl-3-oxo-2,3-dihydro-1H-pyrrol-2-yl)hydrazine-1,2-dicarboxylate (S3w)**

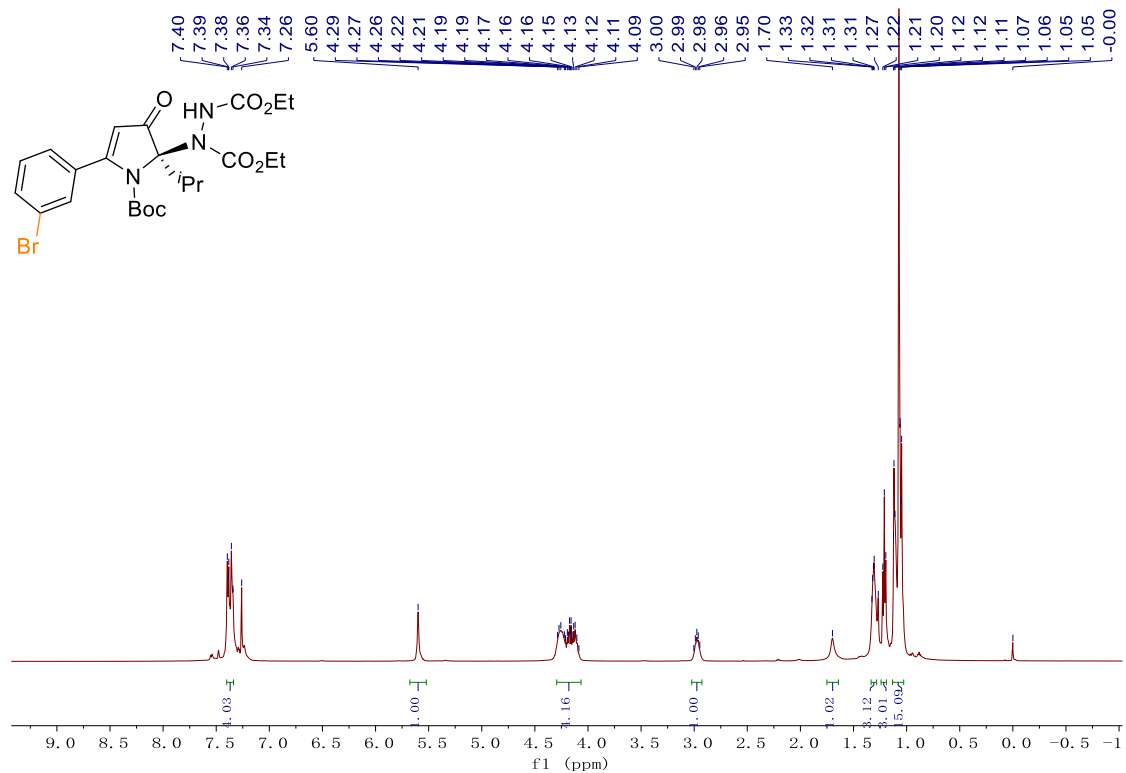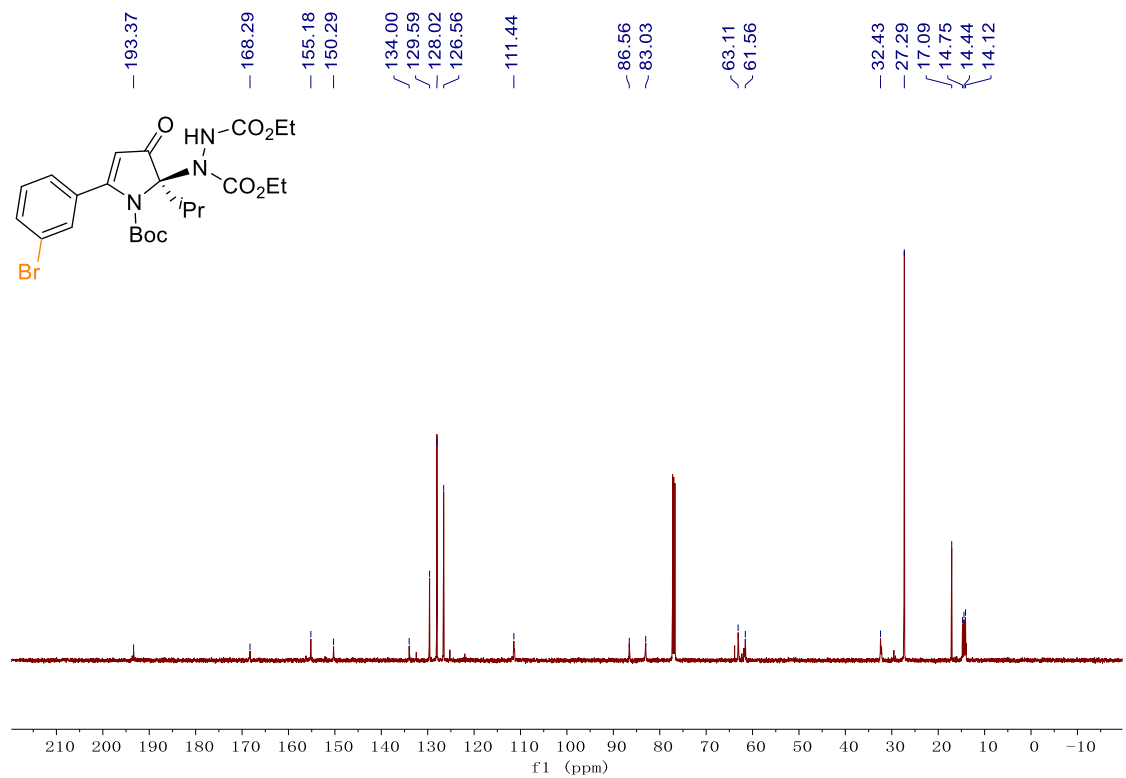

**diethyl (*R*)-1-(5-(3,5-bis(trifluoromethyl)phenyl)-1-(tert-butoxycarbonyl)-2-isopropyl-3-oxo-2,3-dihydro-1H-pyrrol-2-yl)hydrazine-1,2-dicarboxylate (S3x)**

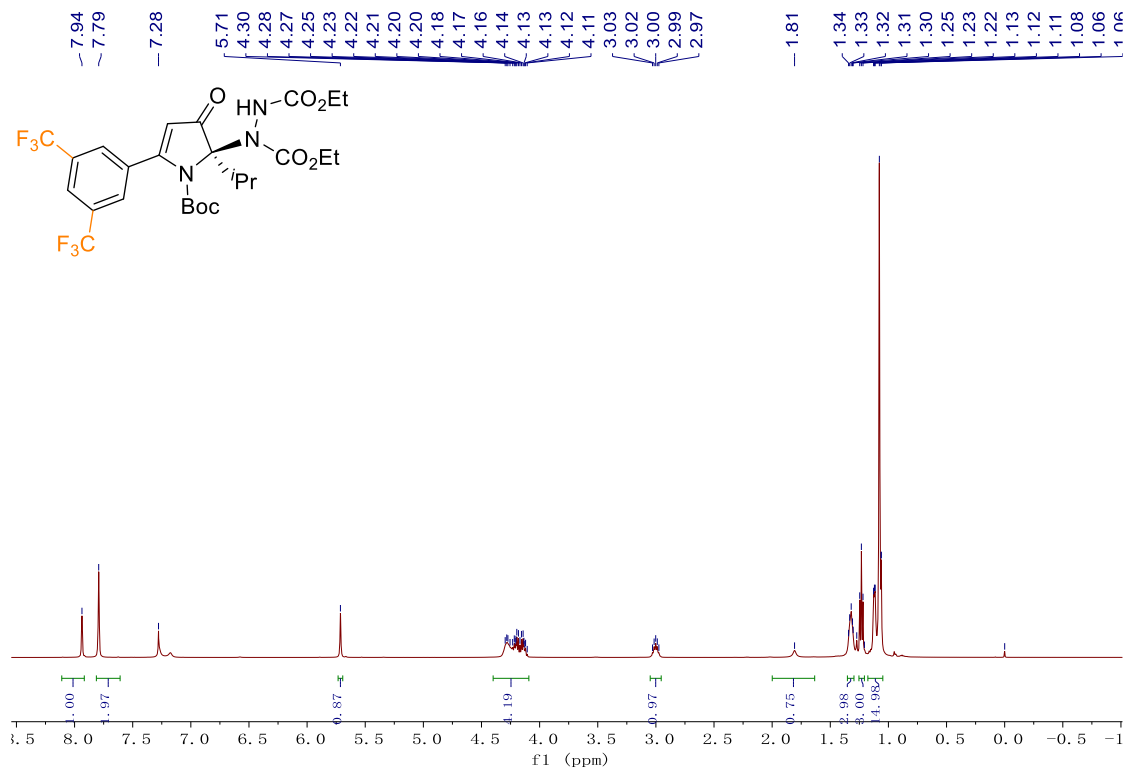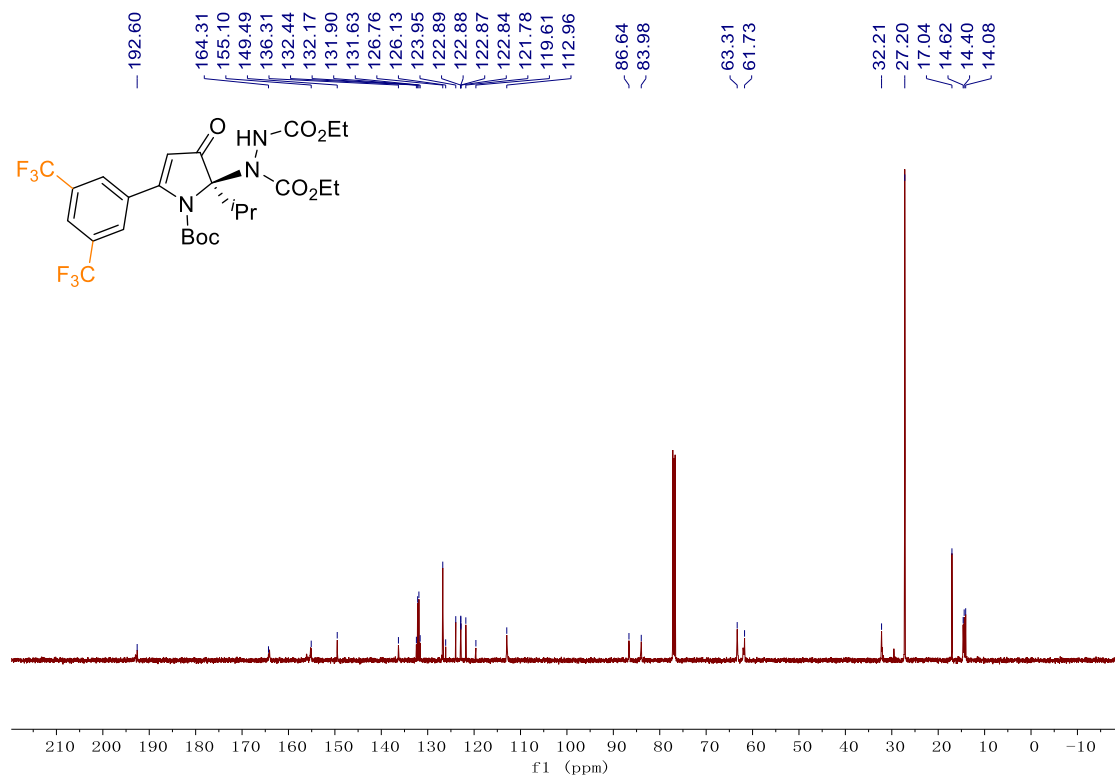

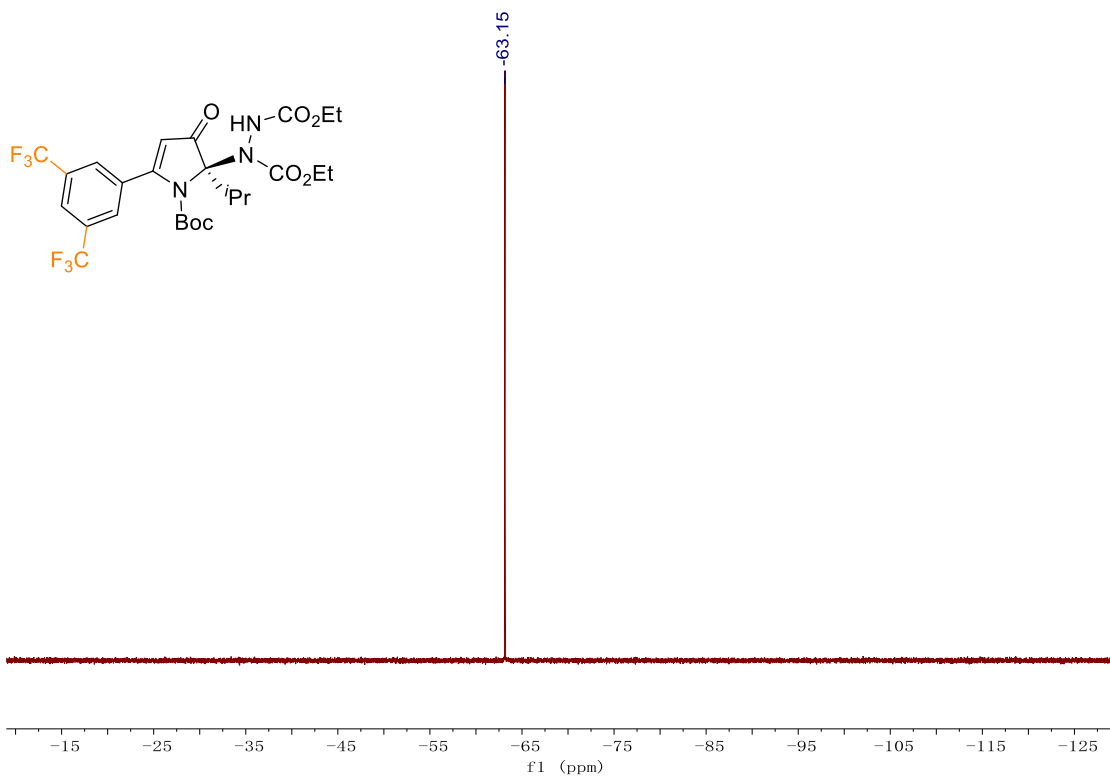

**diethyl (*R*)-1-(1-(tert-butoxycarbonyl)-2-isopropyl-5-(naphthalen-1-yl)-3-oxo-2,3-dihydro-1H-pyrrol-2-yl)hydrazine-1,2-dicarboxylate (S3y)**

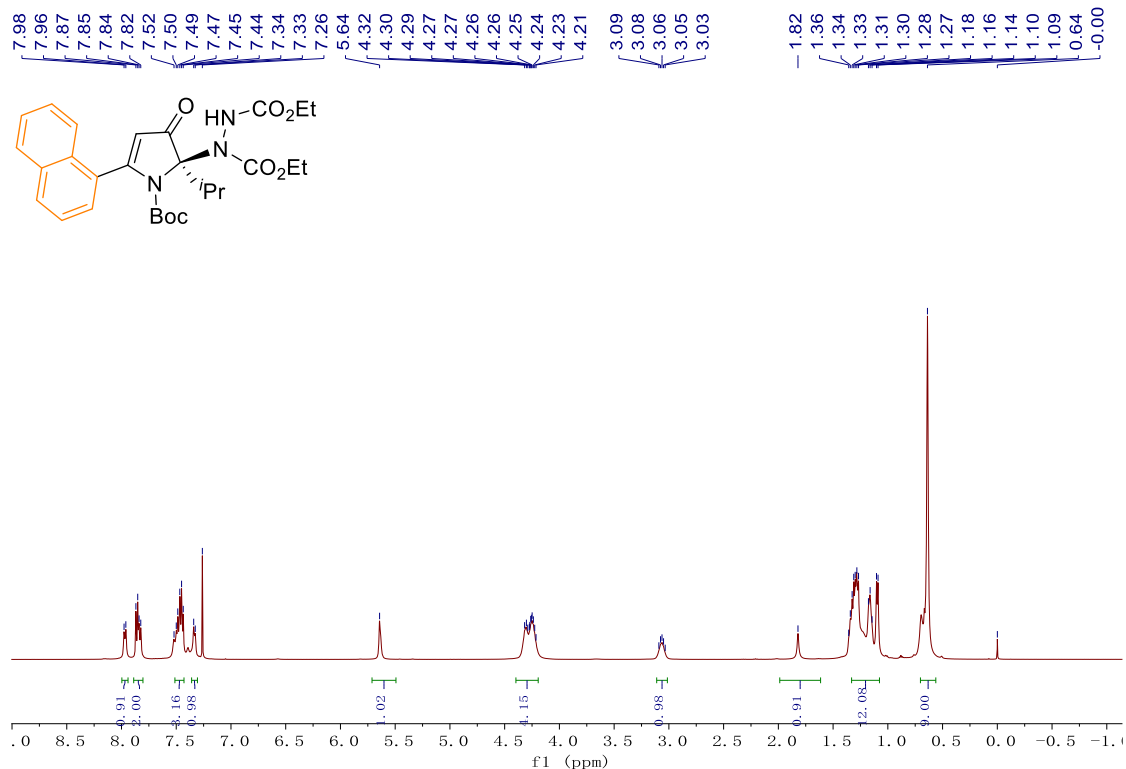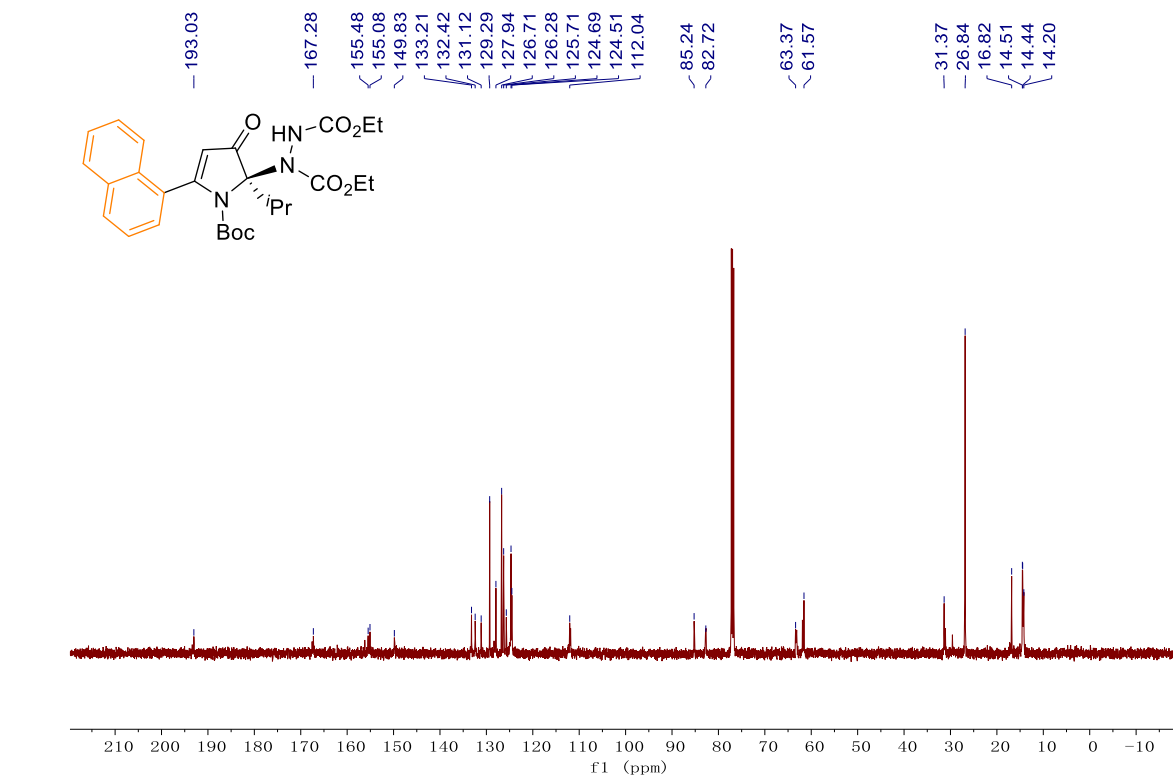

diisopropyl (R)-1-(1-(tert-butoxycarbonyl)-2-butyl-3-oxo-5-phenyl-2,3-dihydro-1H-pyrrol-2-yl)hydrazine-1,2-dicarboxylate (S3z)

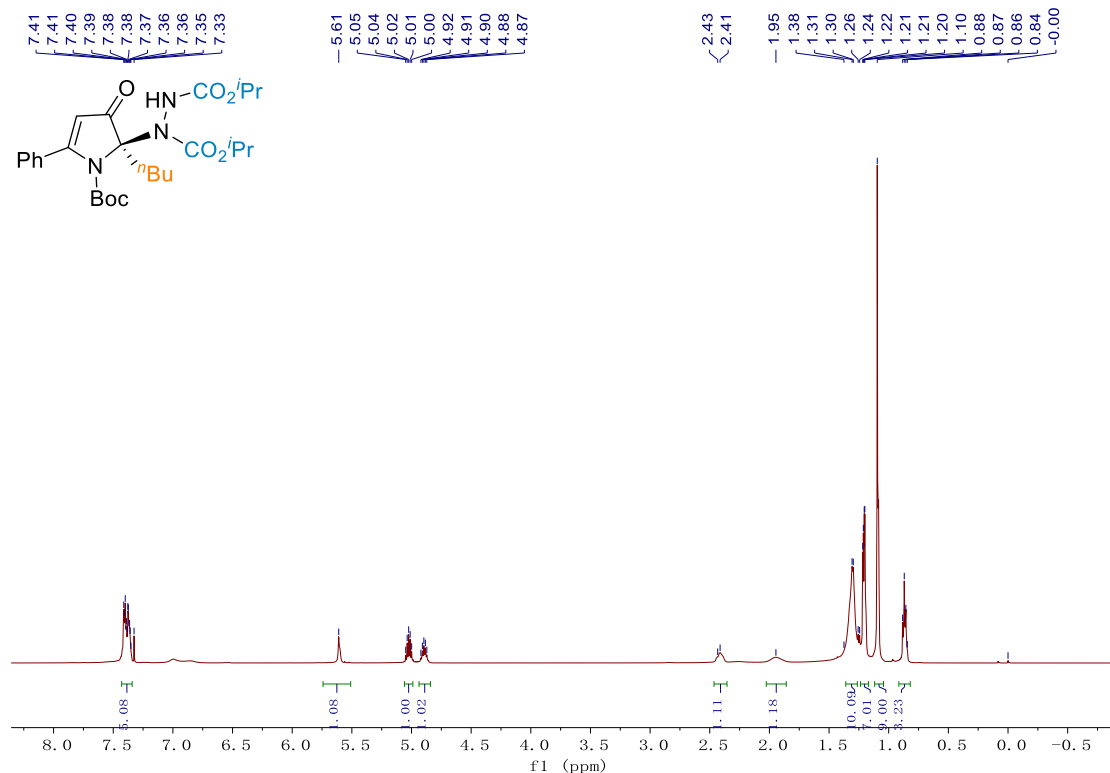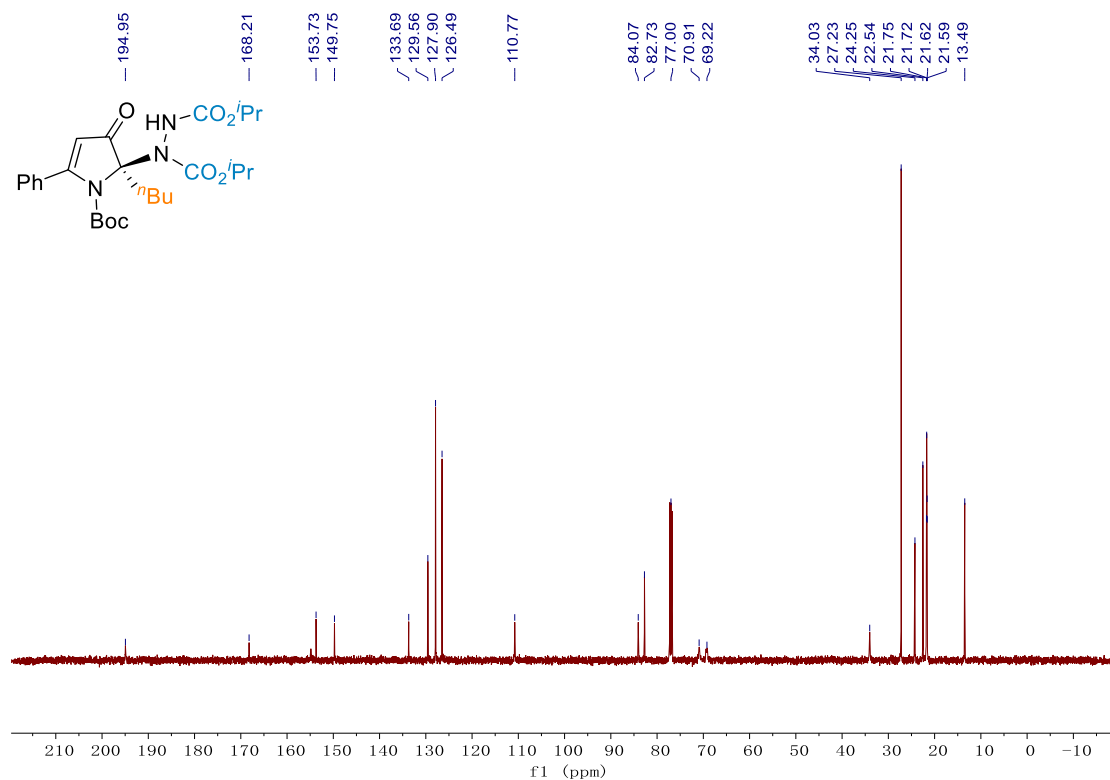

**diethyl (*R*)-1-(1-(tert-butoxycarbonyl)-2-(4-nitrobenzyl)-3-oxo-5-phenyl-2,3-dihydro-1H-pyrrol-2-yl)hydrazine-1,2-dicarboxylate (S3aa)**

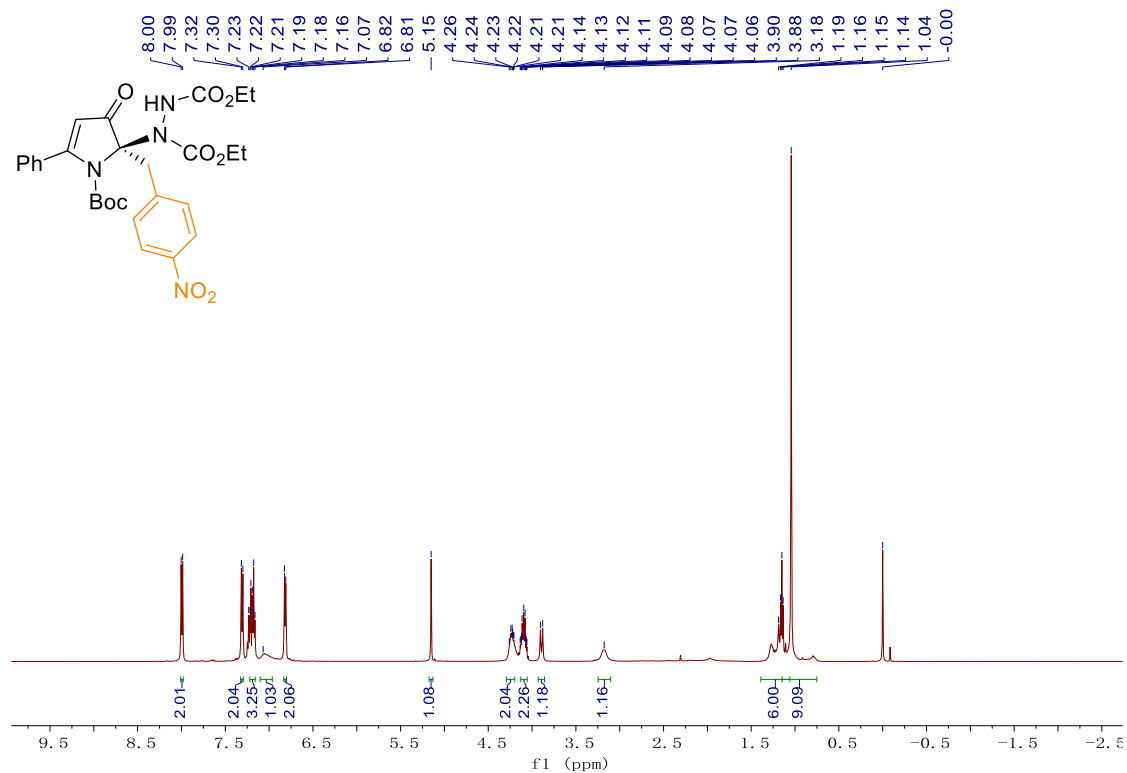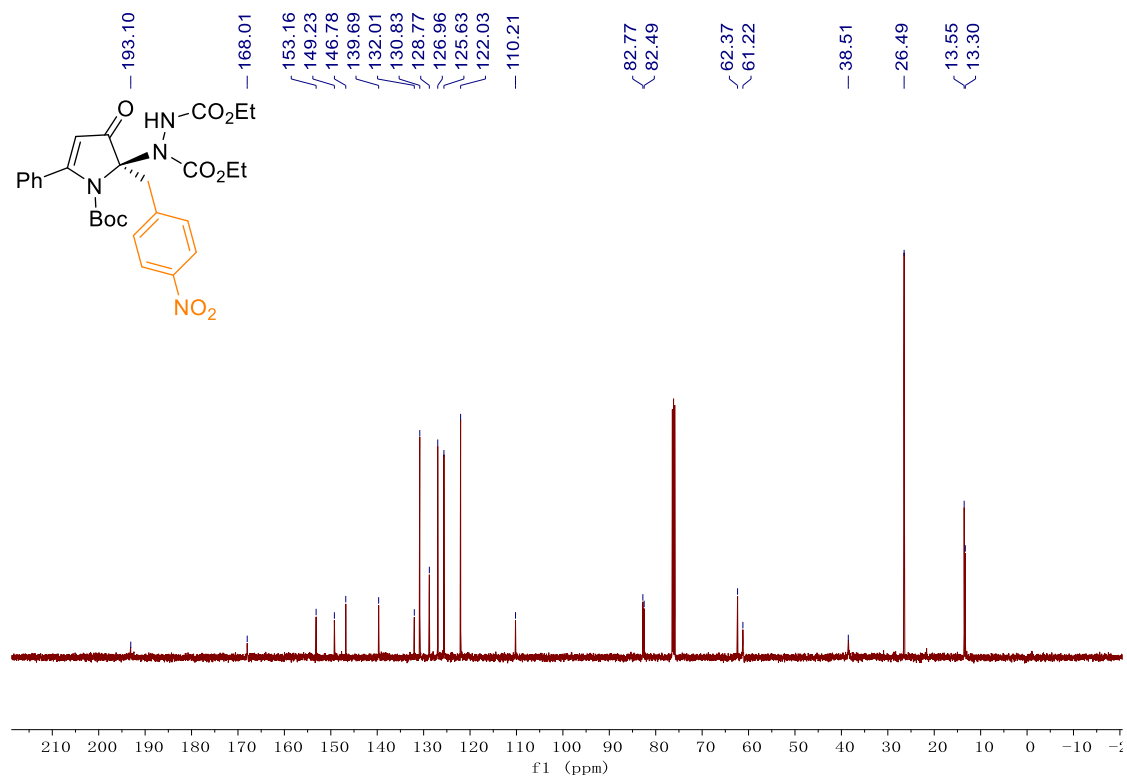

**diisopropyl (R)-1-(1-(tert-butoxycarbonyl)-2-(4-nitrobenzyl)-3-oxo-5-phenyl-2,3-dihydro-1H-pyrrol-2-yl)hydrazine-1,2-dicarboxylate (S3ab)**

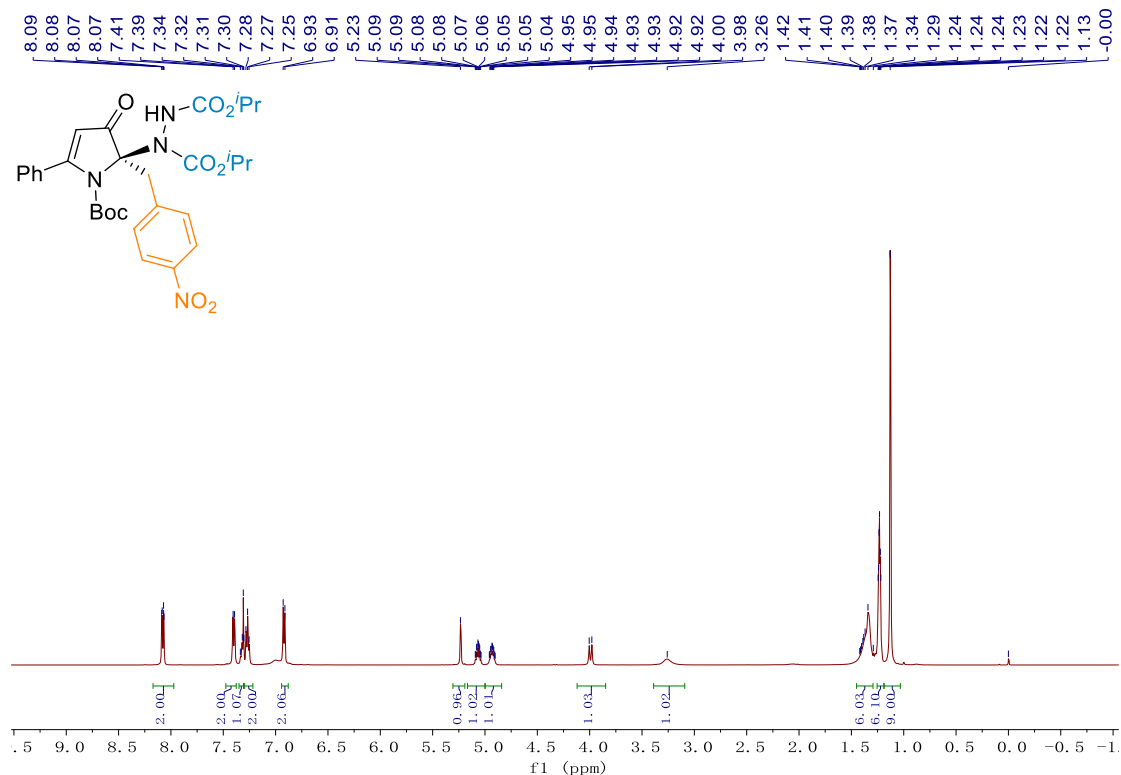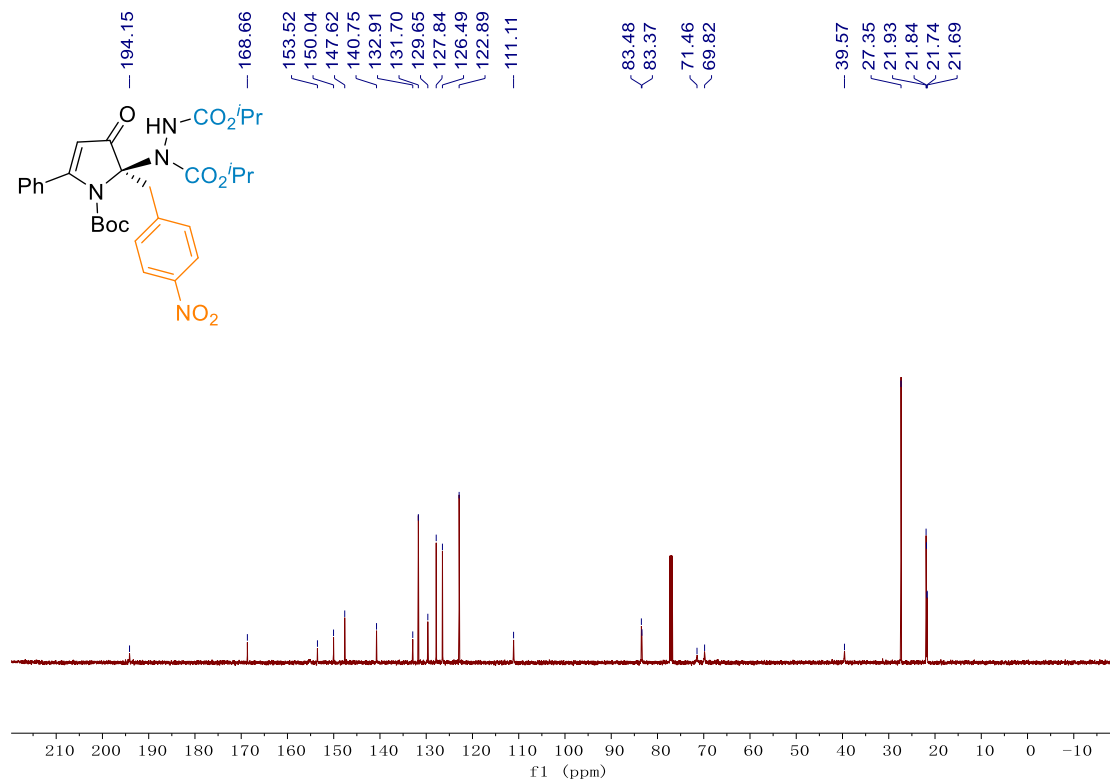

**diethyl (R)-1-(1-((benzyloxy)carbonyl)-2-isopropyl-3-oxo-5-phenyl-2,3-dihydro-1H-pyrrol-2-yl)hydrazine-1,2-dicarboxylate (S3ac)**

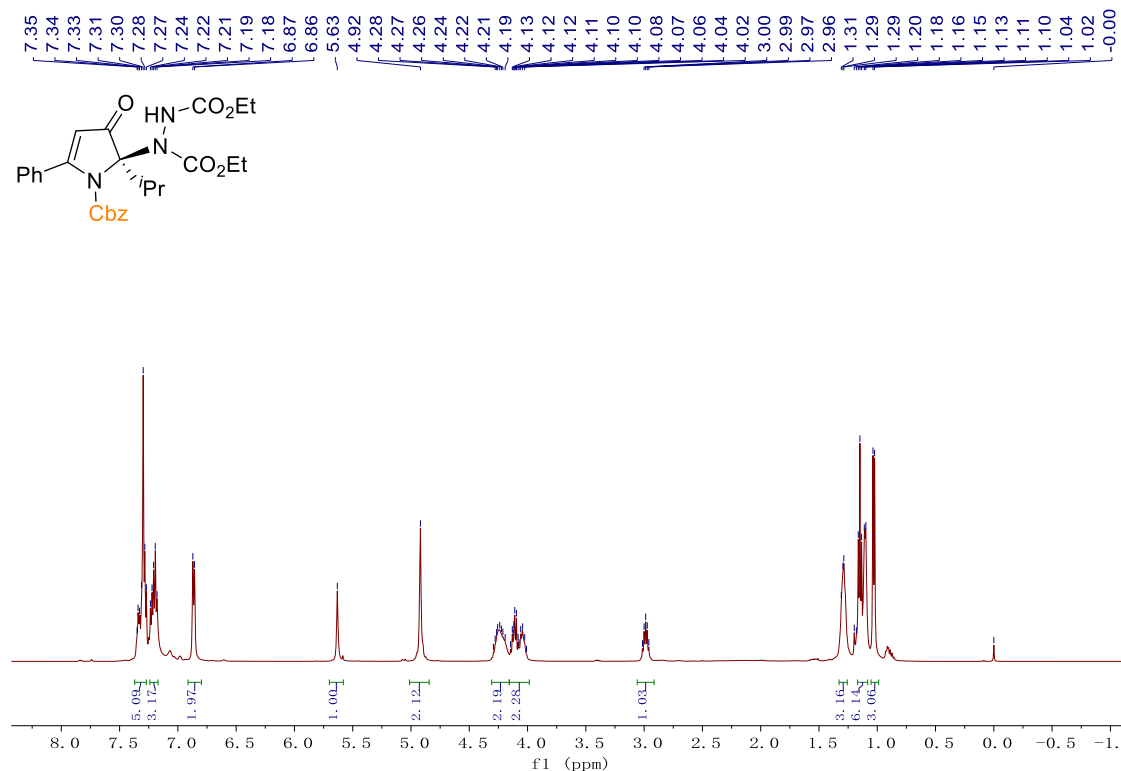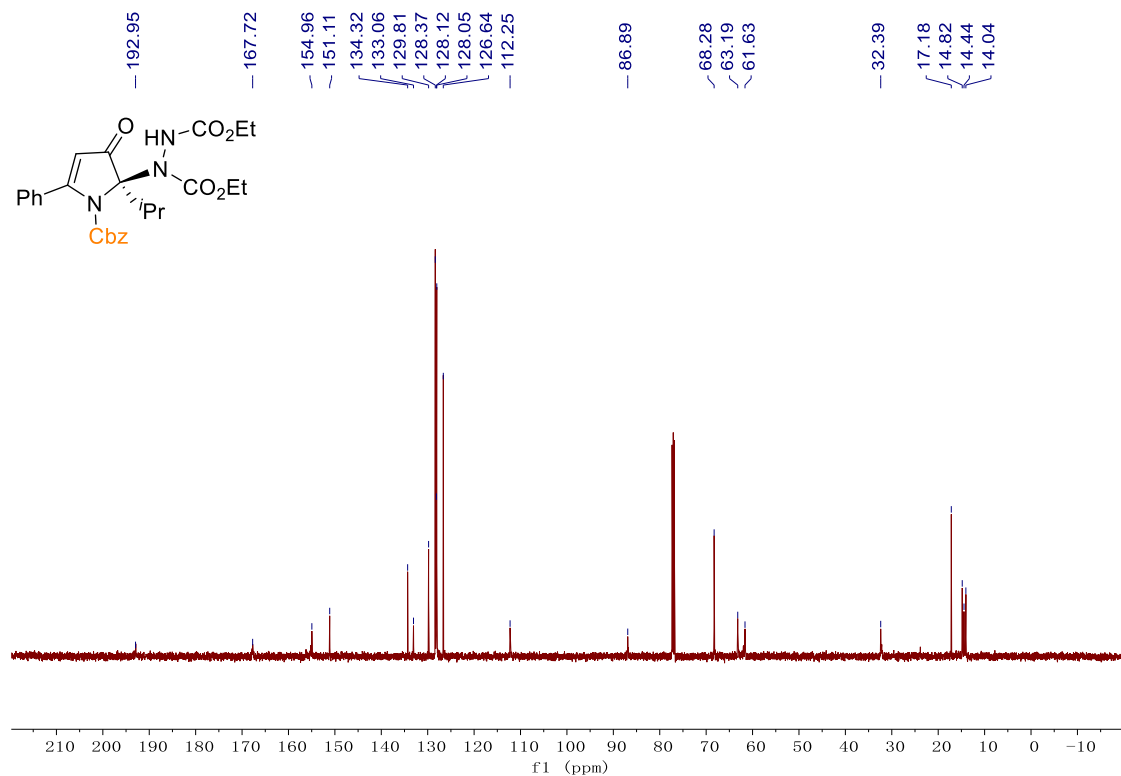



**diisopropyl-1-(1-(tert-butoxycarbonyl)-2-methyl-3-oxo-5-phenyl-2,3-dihydro-1H-pyrrol-2-yl)-2-(2-(ethoxycarbonyl)allyl)hydrazine-1,2-dicarboxylate (5)**

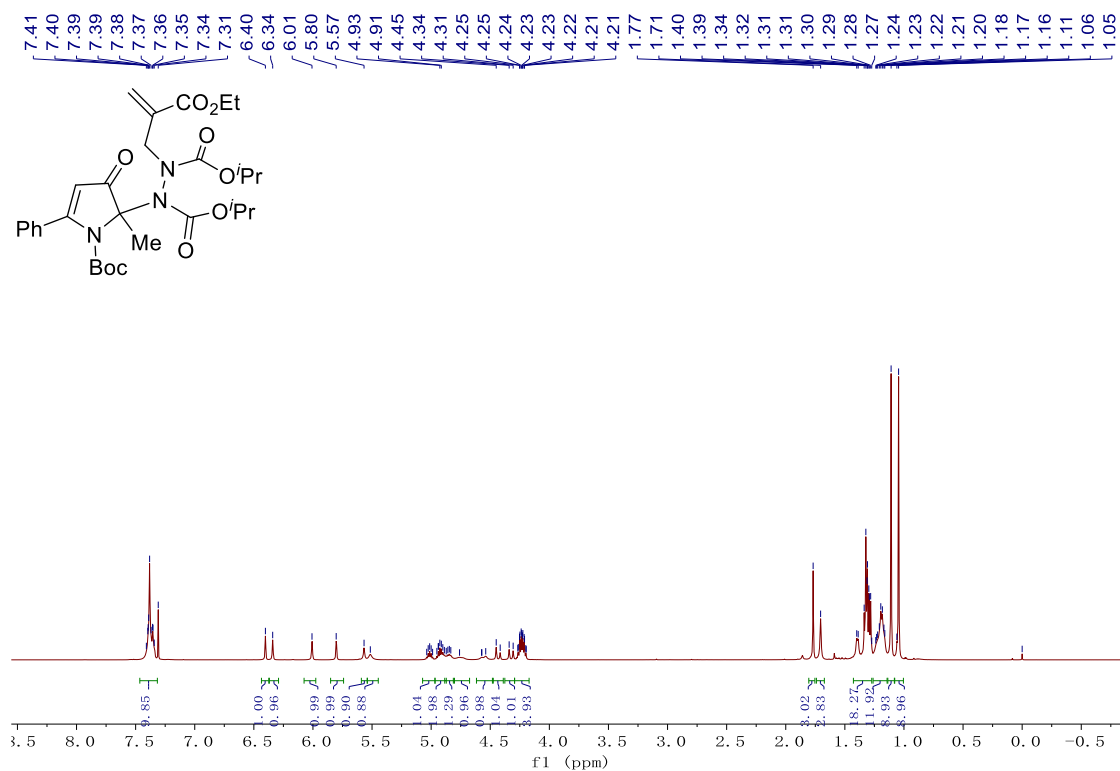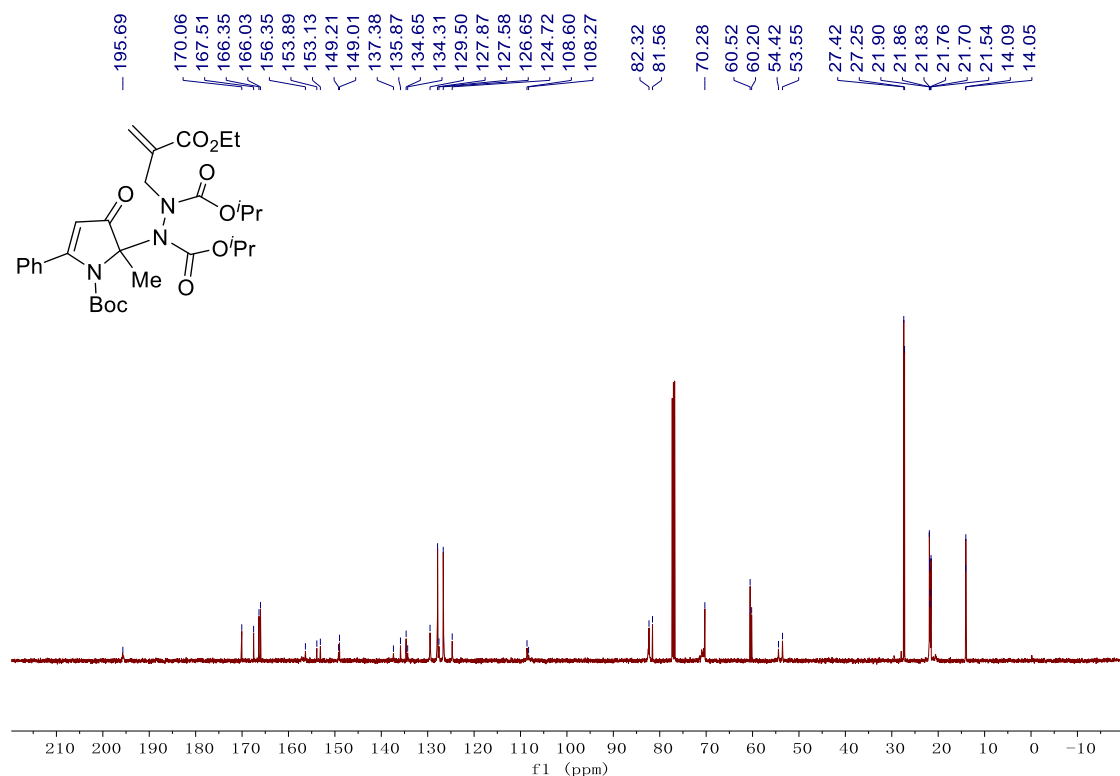

**diisopropyl (*R,R*)-1-(1-(tert-butoxycarbonyl)-2-isopropyl-3-oxo-5-phenyl-2,3-dihydro-1H-pyrrol-2-yl)-2-(2-(ethoxycarbonyl)allyl)hydrazine-1,2-dicarboxylate (6a)**

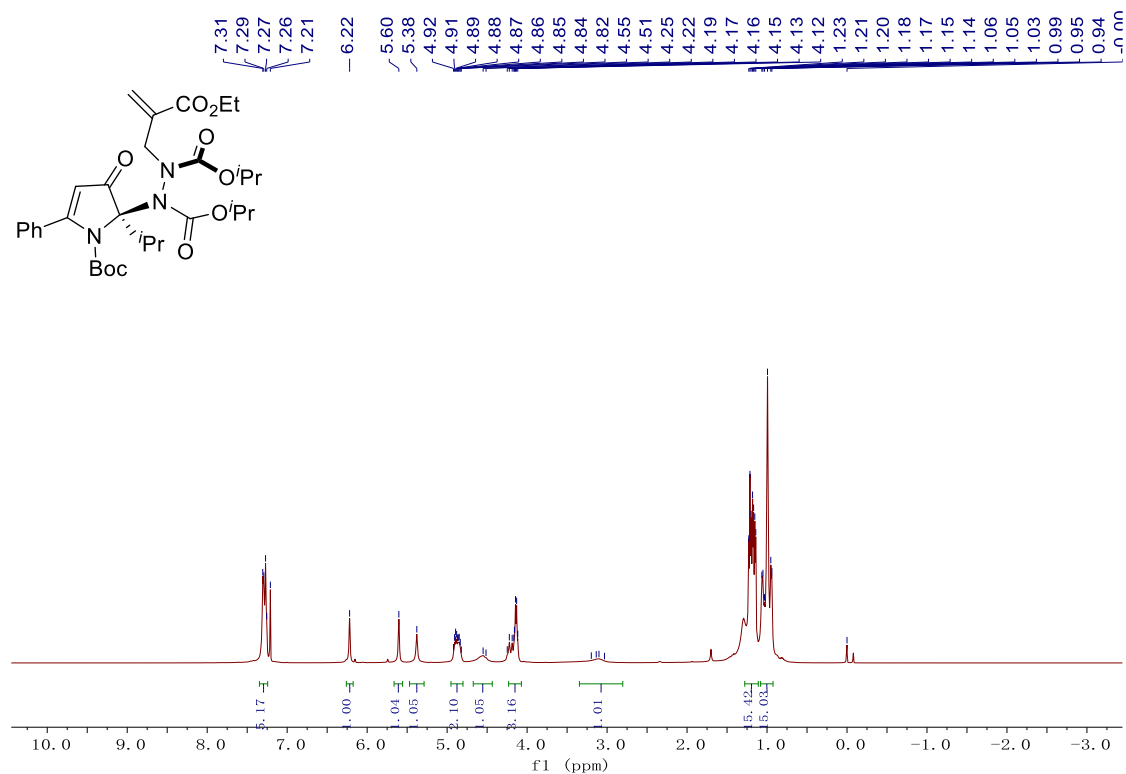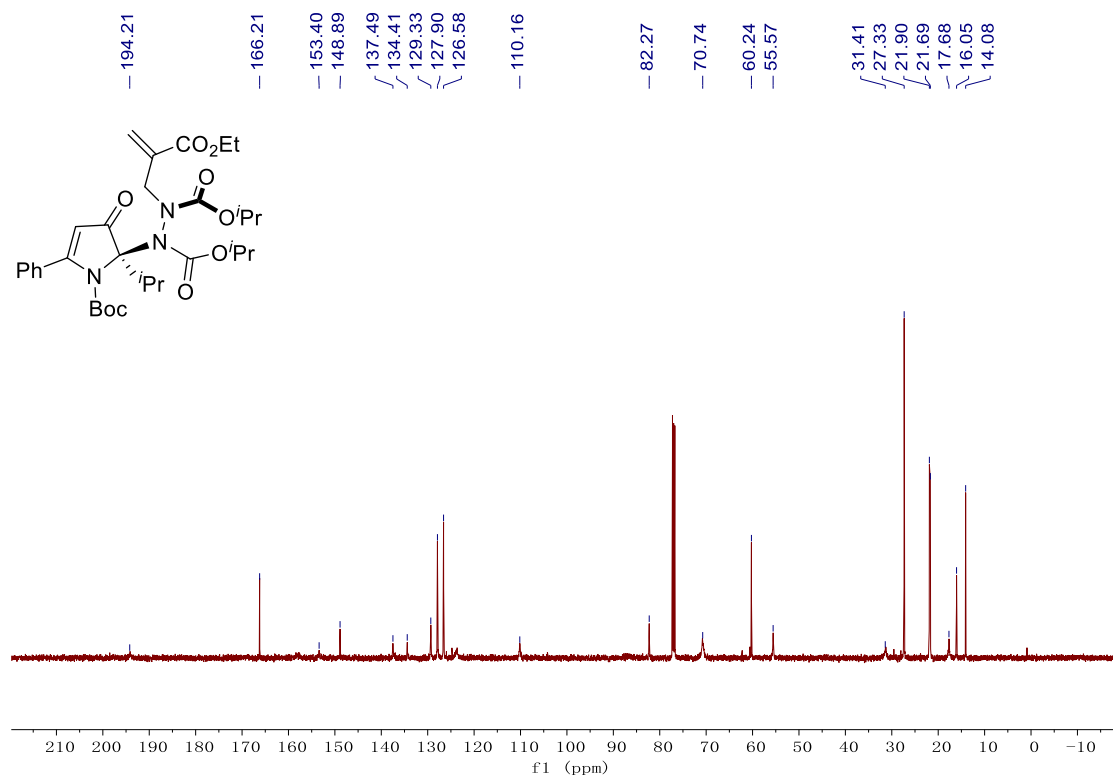

**diisopropyl (R,R)-1-(1-(tert-butoxycarbonyl)-2-isopropyl-3-oxo-5-(m-tolyl)-2,3-dihydro-1H-pyrrol-2-yl)-2-(2-(ethoxycarbonyl)allyl)hydrazine-1,2-dicarboxylate (6b)**

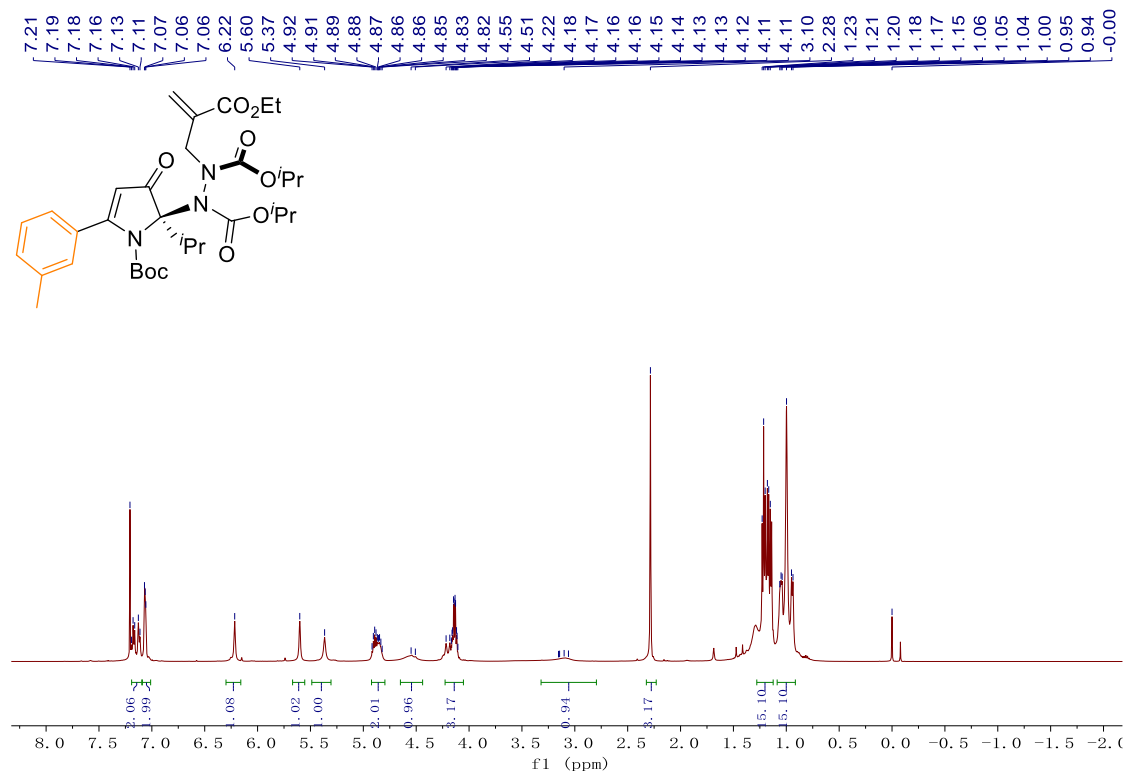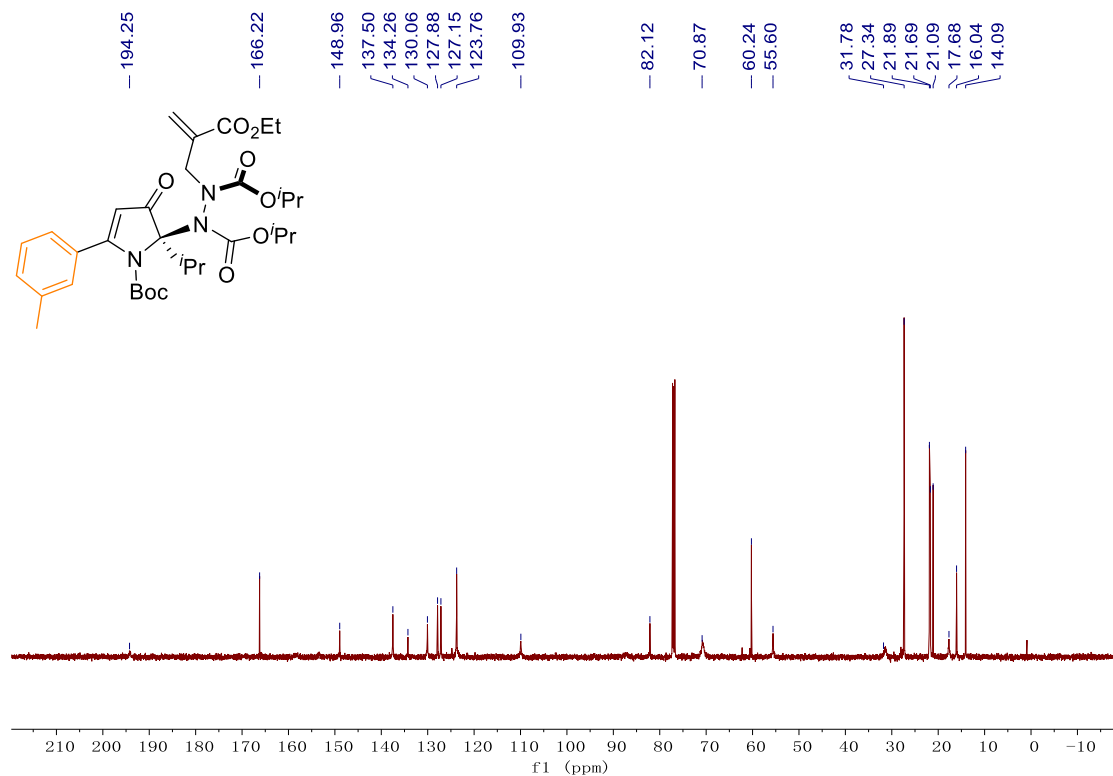

**diisopropyl (R,R)-1-(1-(tert-butoxycarbonyl)-5-(3-fluorophenyl)-2-isopropyl-3-oxo-2,3-dihydro-1H-pyrrol-2-yl)-2-(2-(ethoxycarbonyl)allyl)hydrazine-1,2-dicarboxylate (6c)**

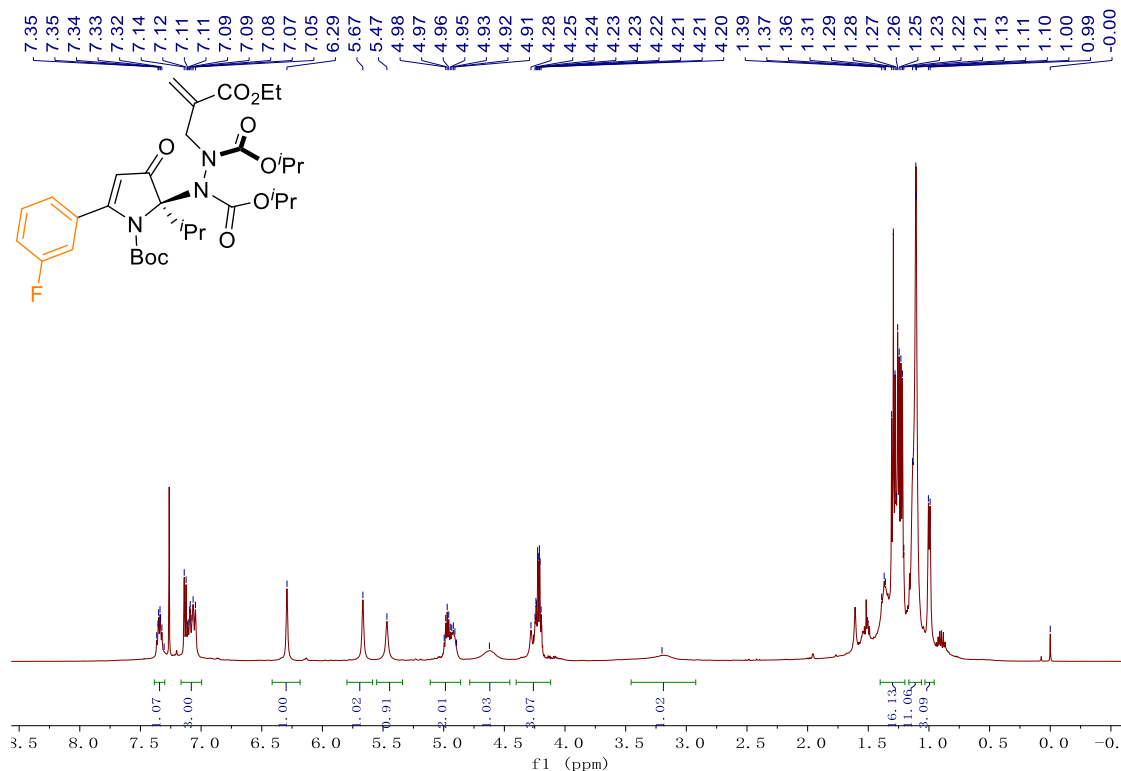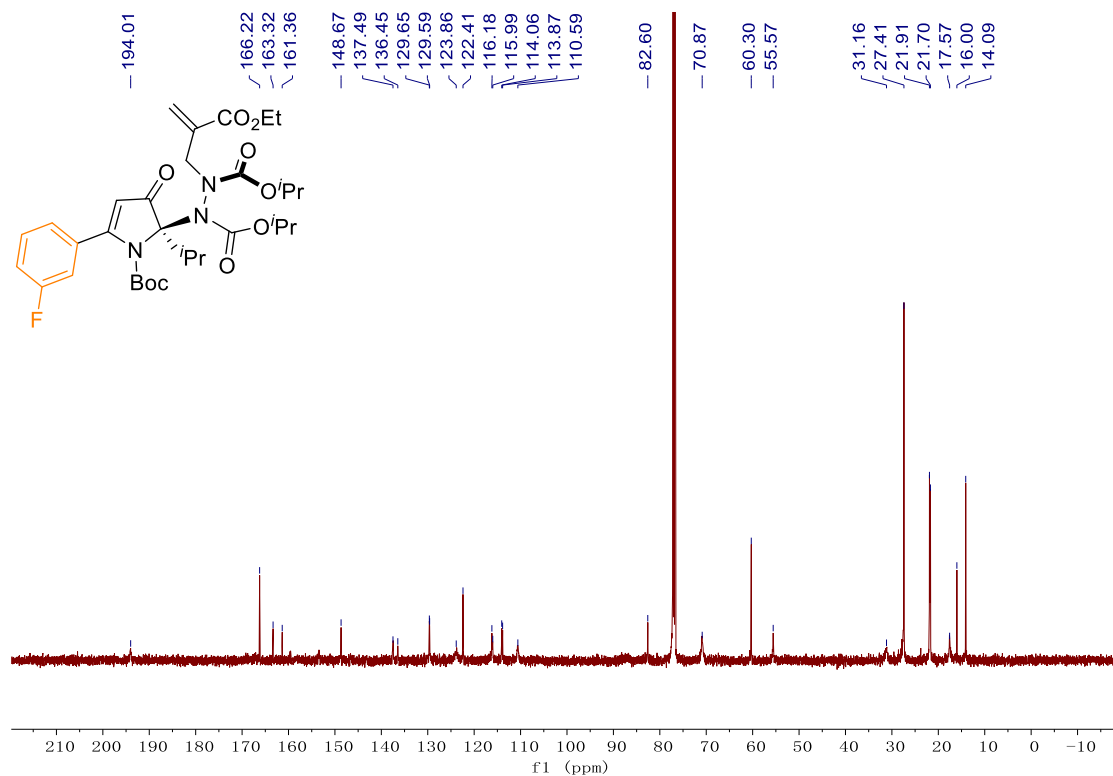

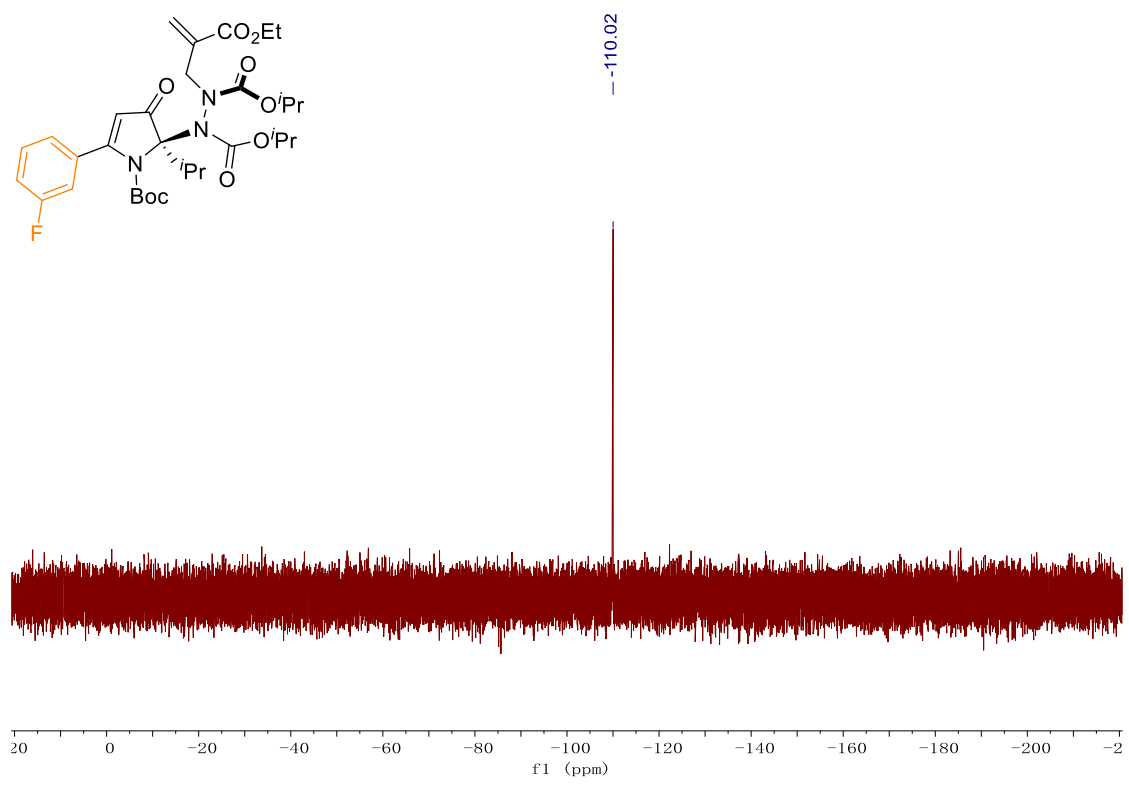

**diisopropyl (R,R)-1-(1-(tert-butoxycarbonyl)-5-(3-chlorophenyl)-2-isopropyl-3-oxo-2,3-dihydro-1H-pyrrol-2-yl)-2-(2-(ethoxycarbonyl)allyl)hydrazine-1,2-dicarboxylate (6d)**

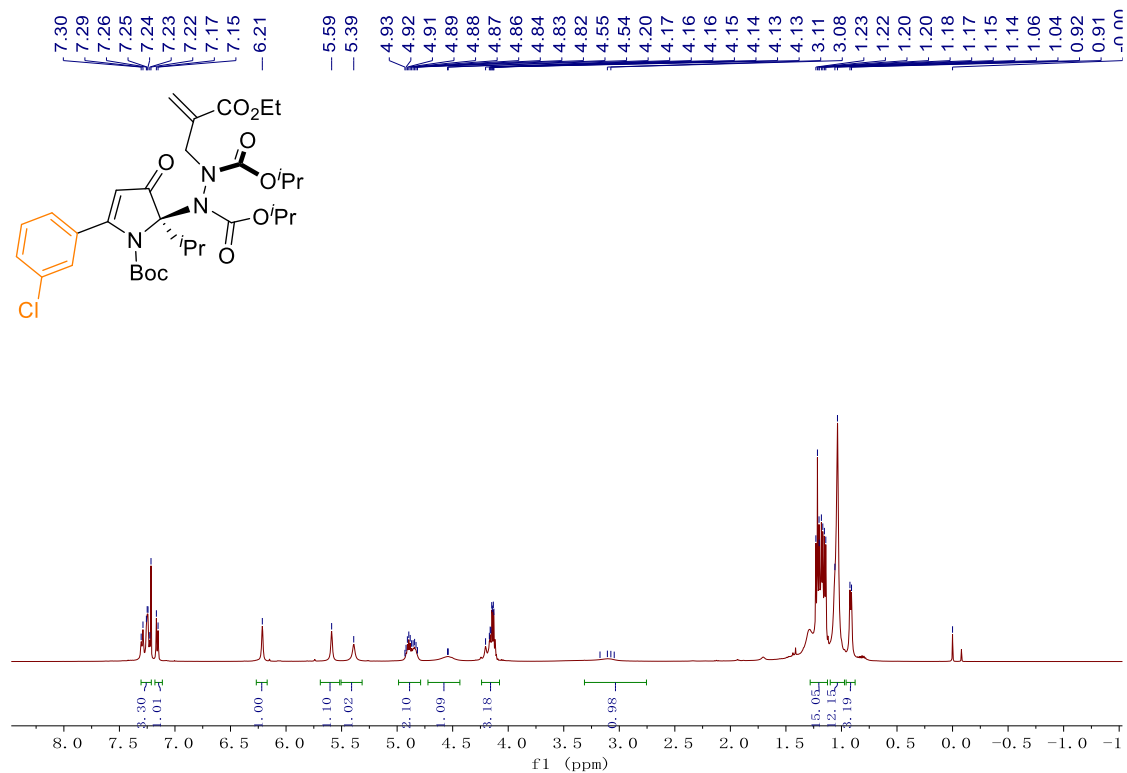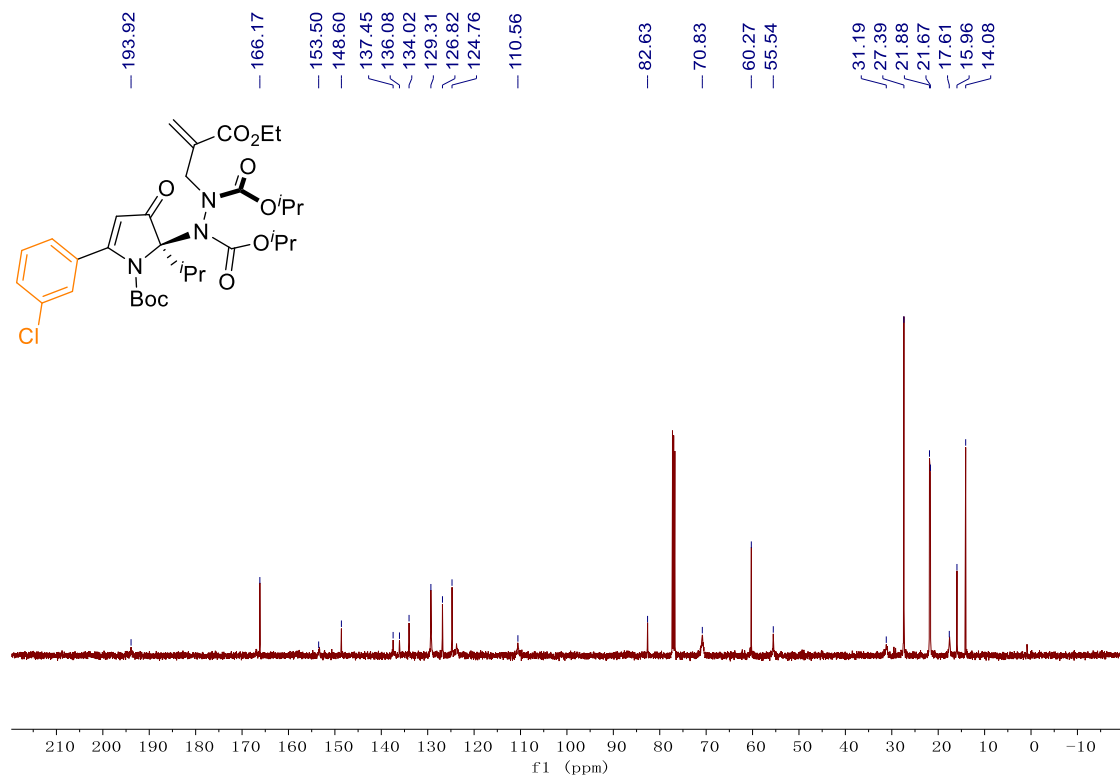

**diisopropyl (R,R)-1-(1-(tert-butoxycarbonyl)-5-(4-ethoxyphenyl)-2-isopropyl-3-oxo-2,3-dihydro-1H-pyrrol-2-yl)-2-(2-(ethoxycarbonyl)allyl)hydrazine-1,2-dicarboxylate (6e)**

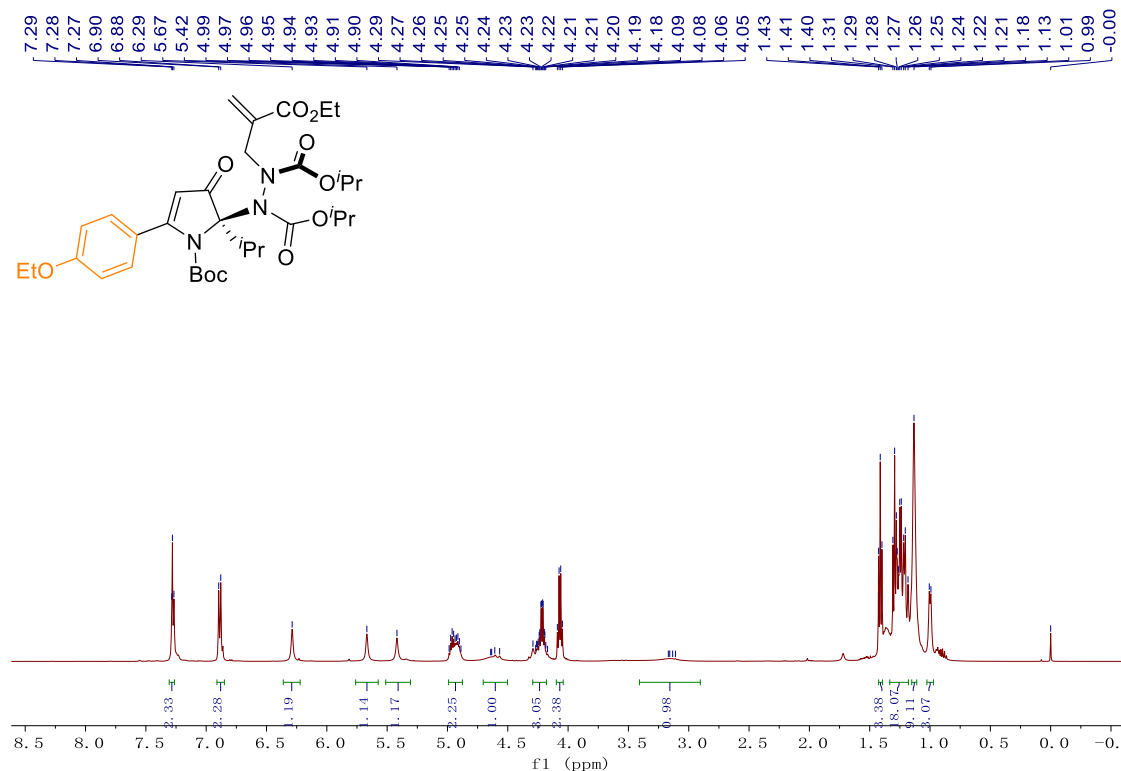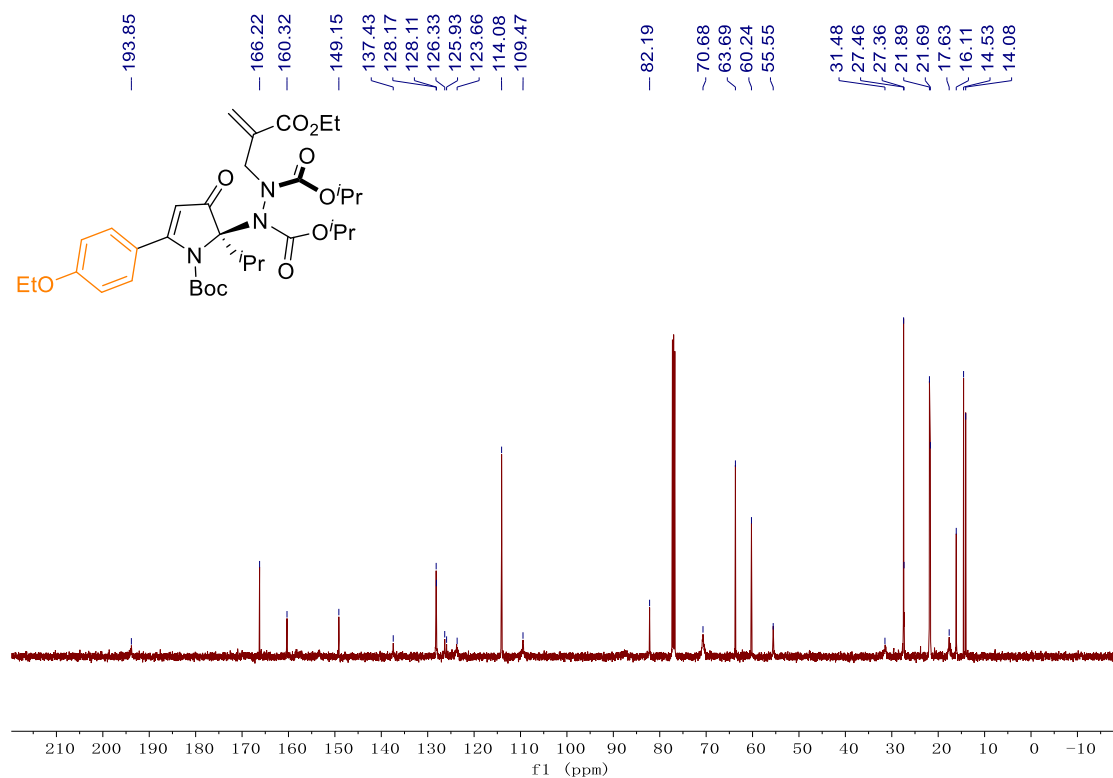

**diisopropyl (R,R)-1-(1-(tert-butoxycarbonyl)-2-isopropyl-3-oxo-5-(p-tolyl)-2,3-dihydro-1H-pyrrol-2-yl)-2-(2-(ethoxycarbonyl)allyl)hydrazine-1,2-dicarboxylate (6f)**

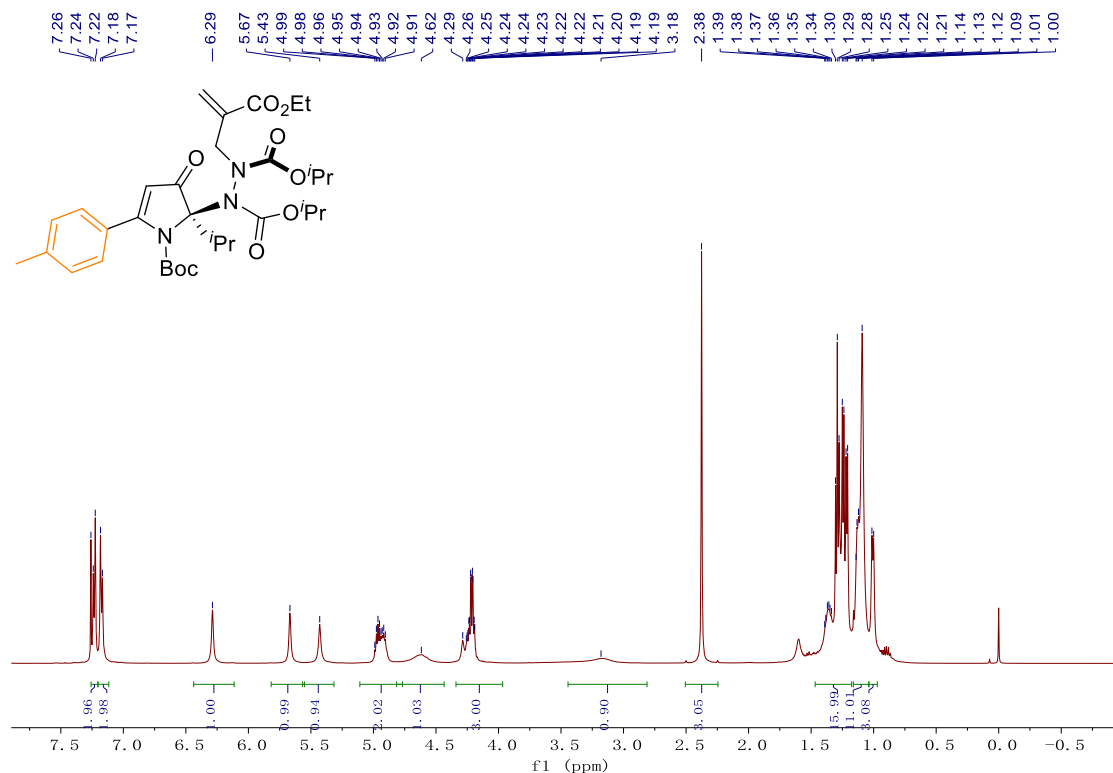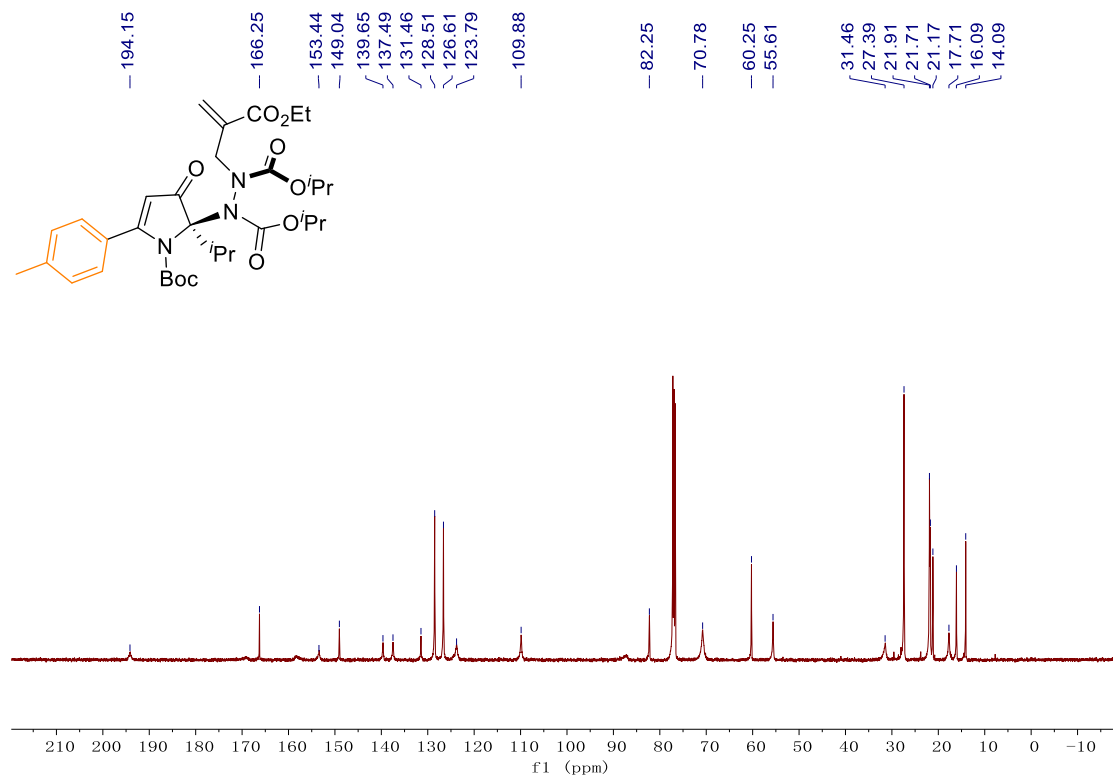



**diisopropyl (R,R)-1-(1-(tert-butoxycarbonyl)-5-(4-ethylphenyl)-2-isopropyl-3-oxo-2,3-dihydro-1H-pyrrol-2-yl)-2-(2-(ethoxycarbonyl)allyl)hydrazine-1,2-dicarboxylate (6g)**

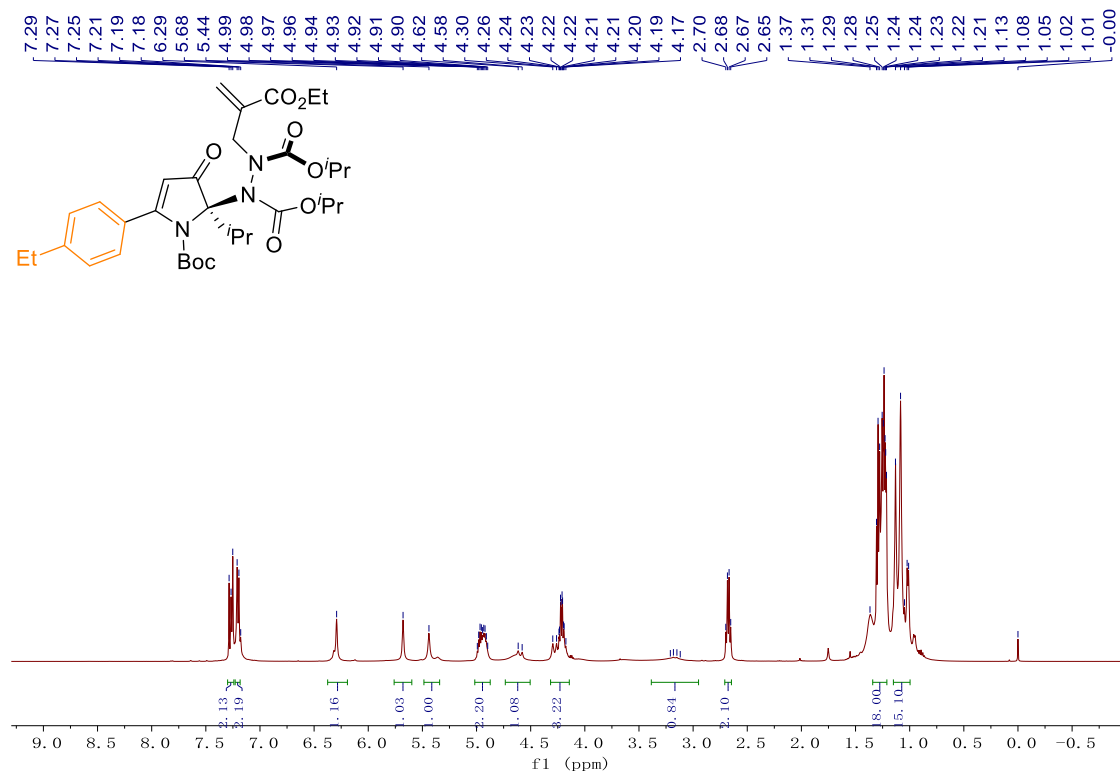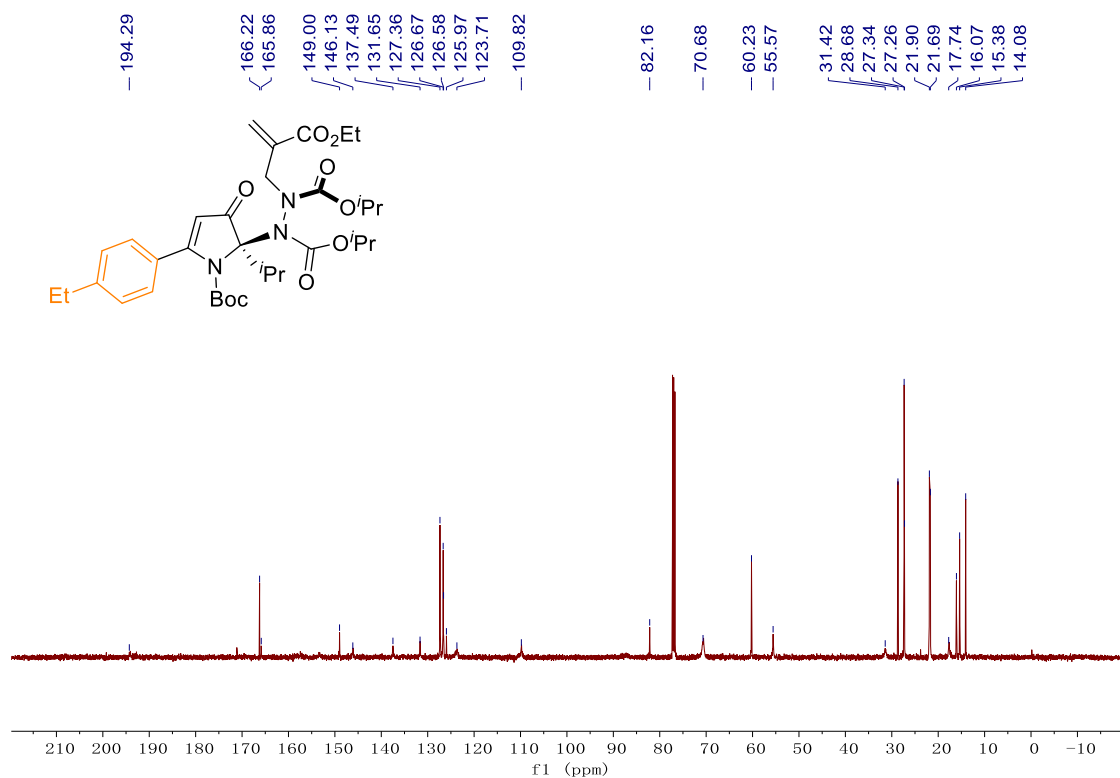

**diisopropyl (R,R)-1-(1-(tert-butoxycarbonyl)-2-isopropyl-3-oxo-5-(4-propylphenyl)-2,3-dihydro-1H-pyrrol-2-yl)-2-(2-(ethoxycarbonyl)allyl)hydrazine-1,2-dicarboxylate (6h)**

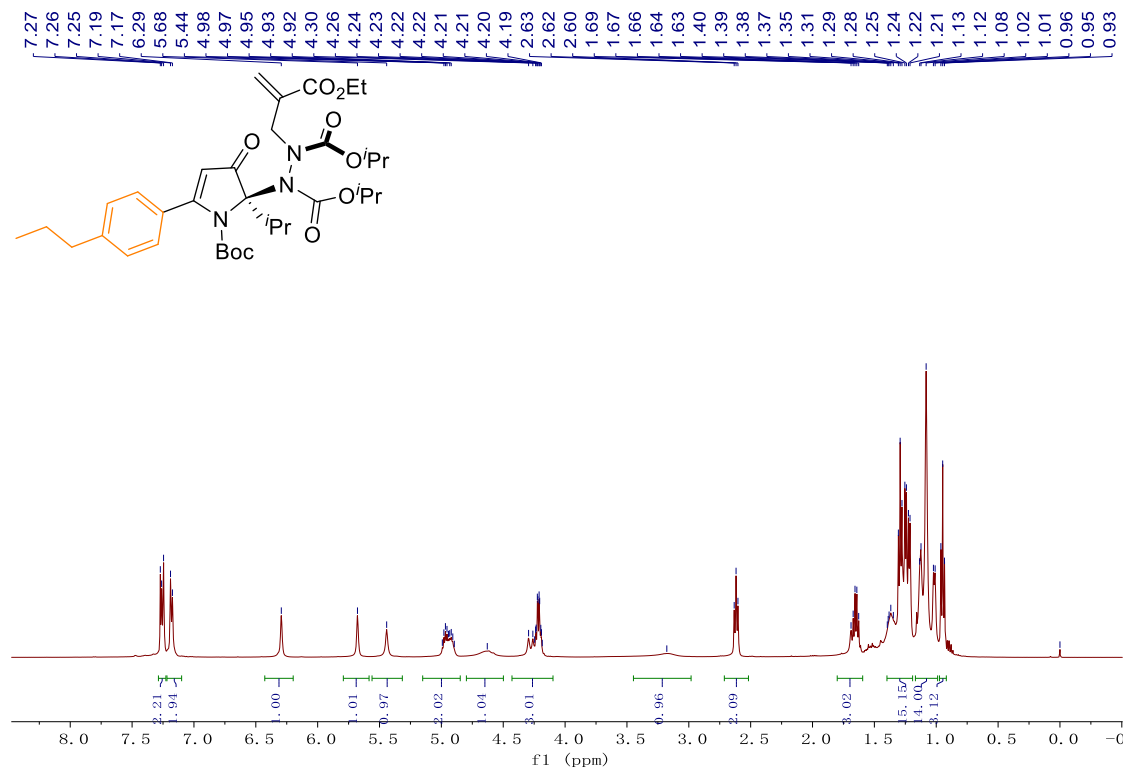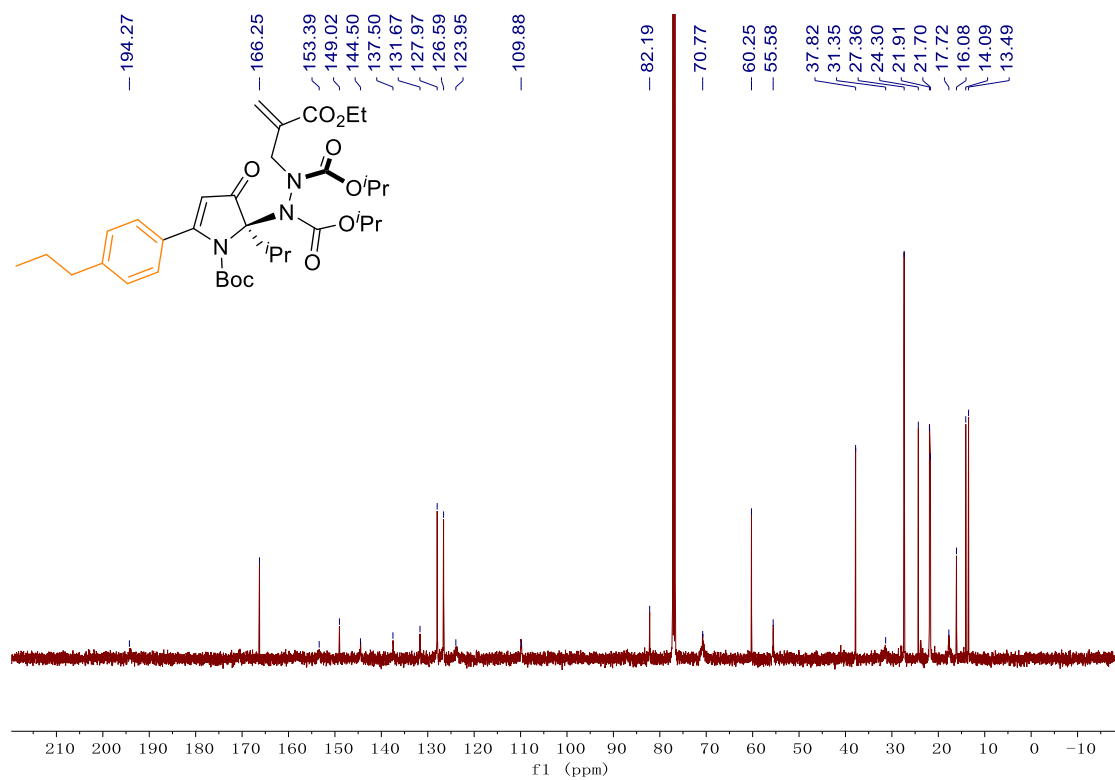

**diisopropyl (R,R)-1-(1-(tert-butoxycarbonyl)-5-(4-butylphenyl)-2-isopropyl-3-oxo-2,3-dihydro-1H-pyrrol-2-yl)-2-(2-(ethoxycarbonyl)allyl)hydrazine-1,2-dicarboxylate (6i)**

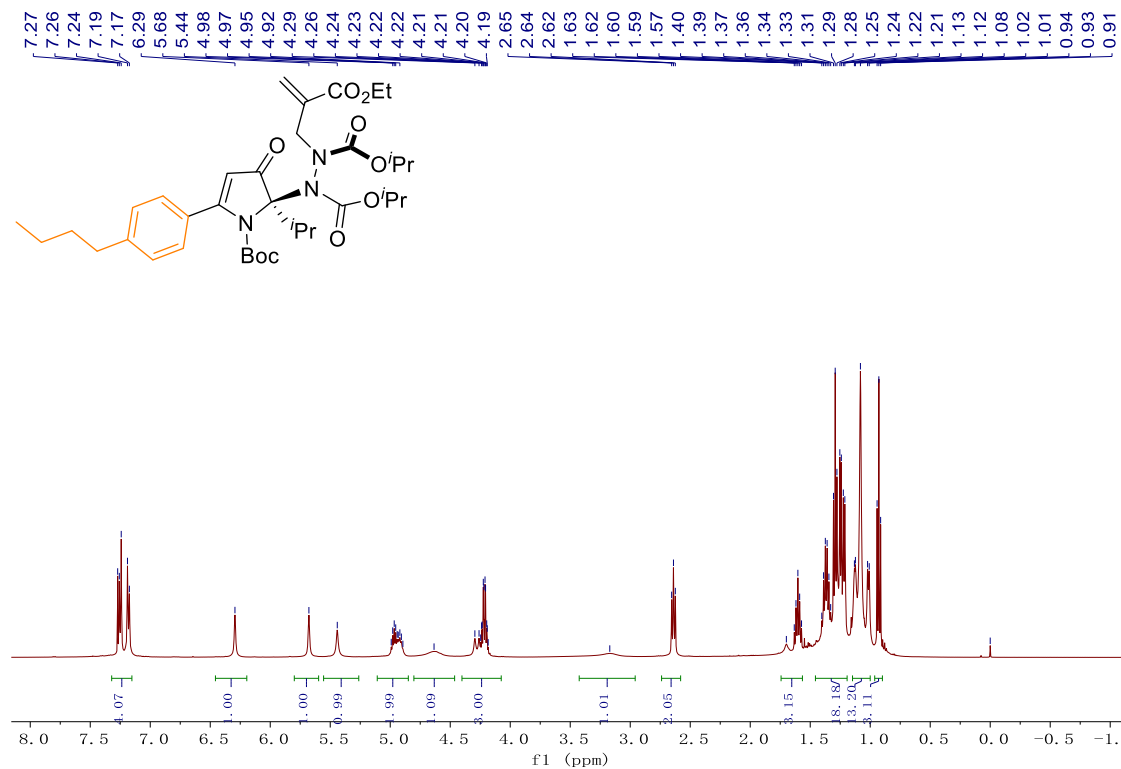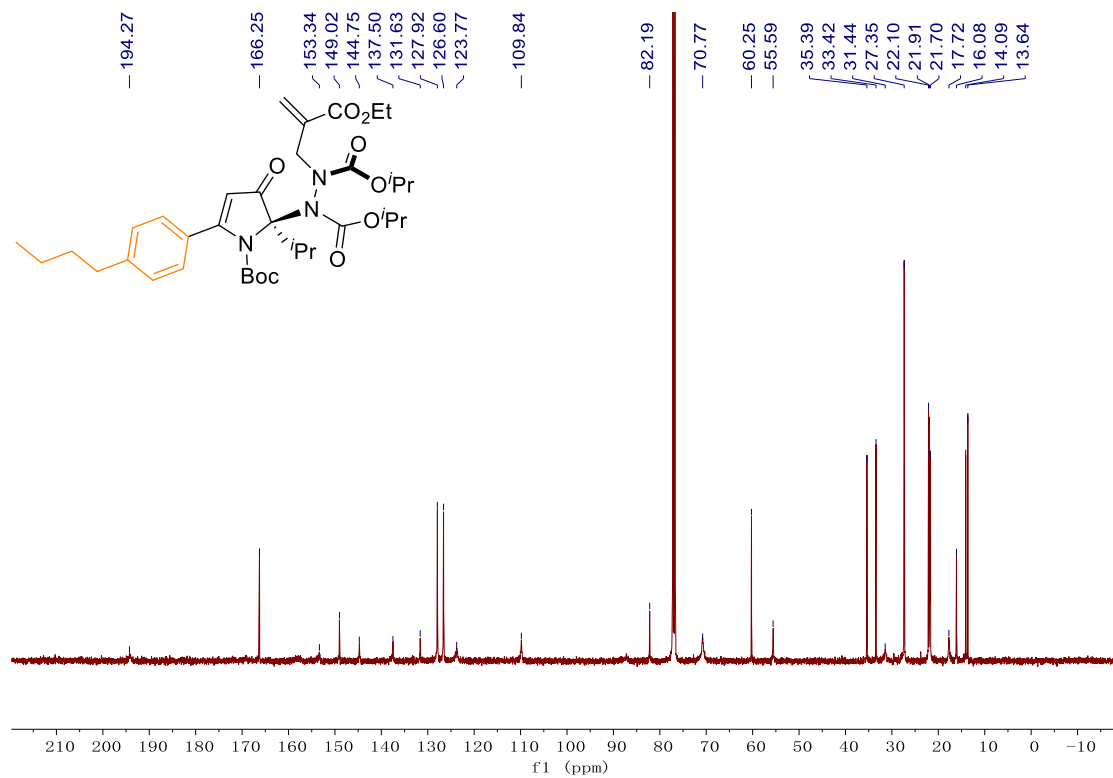

**diisopropyl (R,R)-1-(1-(tert-butoxycarbonyl)-5-(4-(tert-butyl)phenyl)-2-isopropyl-3-oxo-2,3-dihydro-1H-pyrrol-2-yl)-2-(2-(ethoxycarbonyl)allyl)hydrazine-1,2-dicarboxylate (6j)**

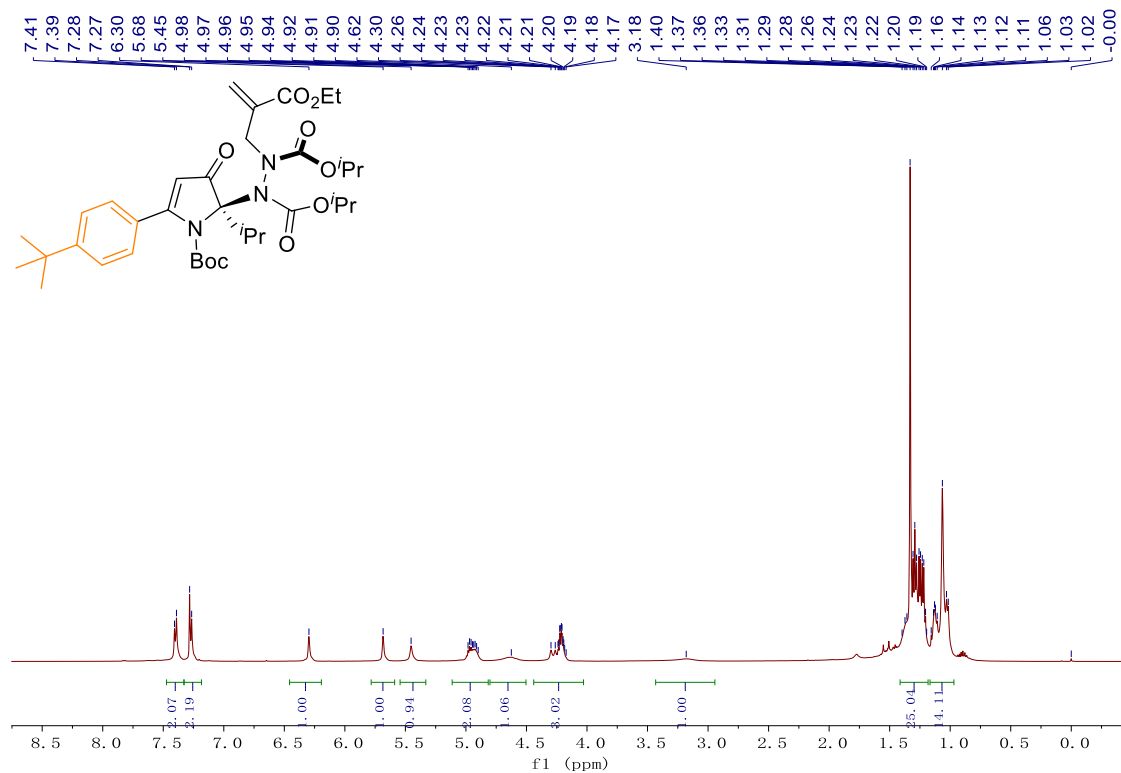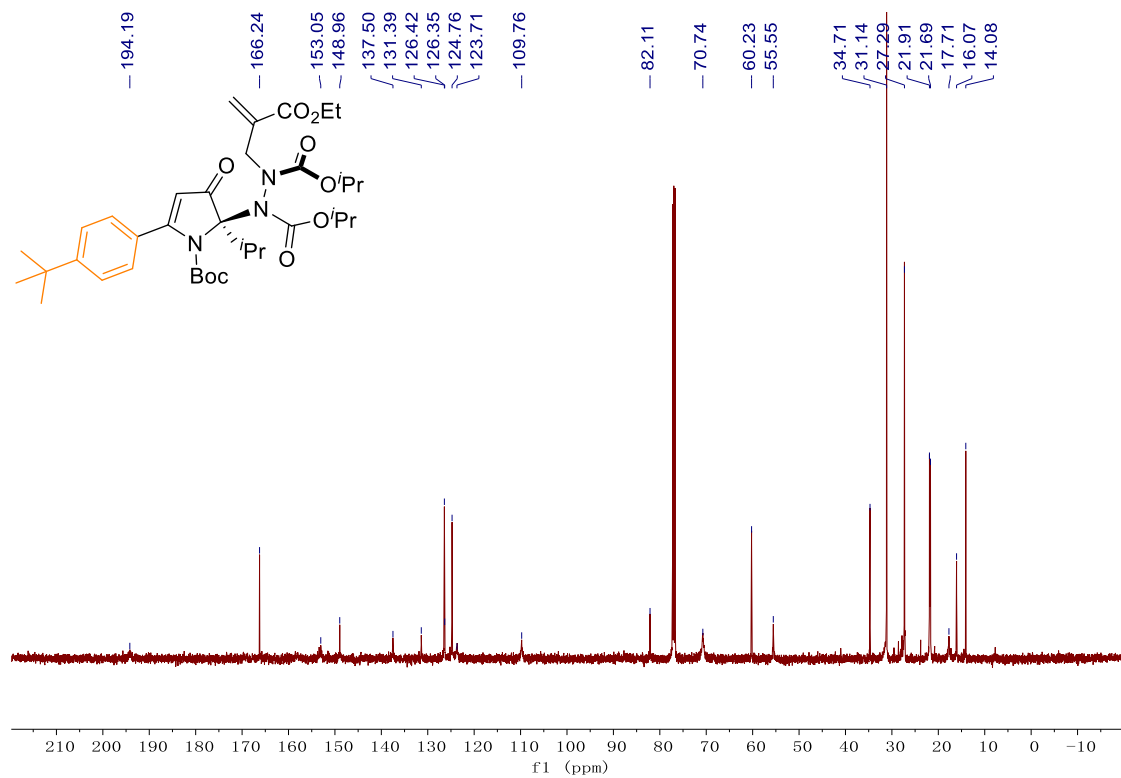

**diisopropyl (R,R)-1-(5-([1,1'-biphenyl]-4-yl)-1-(tert-butoxycarbonyl)-2-isopropyl-3-oxo-2,3-dihydro-1H-pyrrol-2-yl)-2-(2-(ethoxycarbonyl)allyl)hydrazine-1,2-dicarboxylate (6k)**

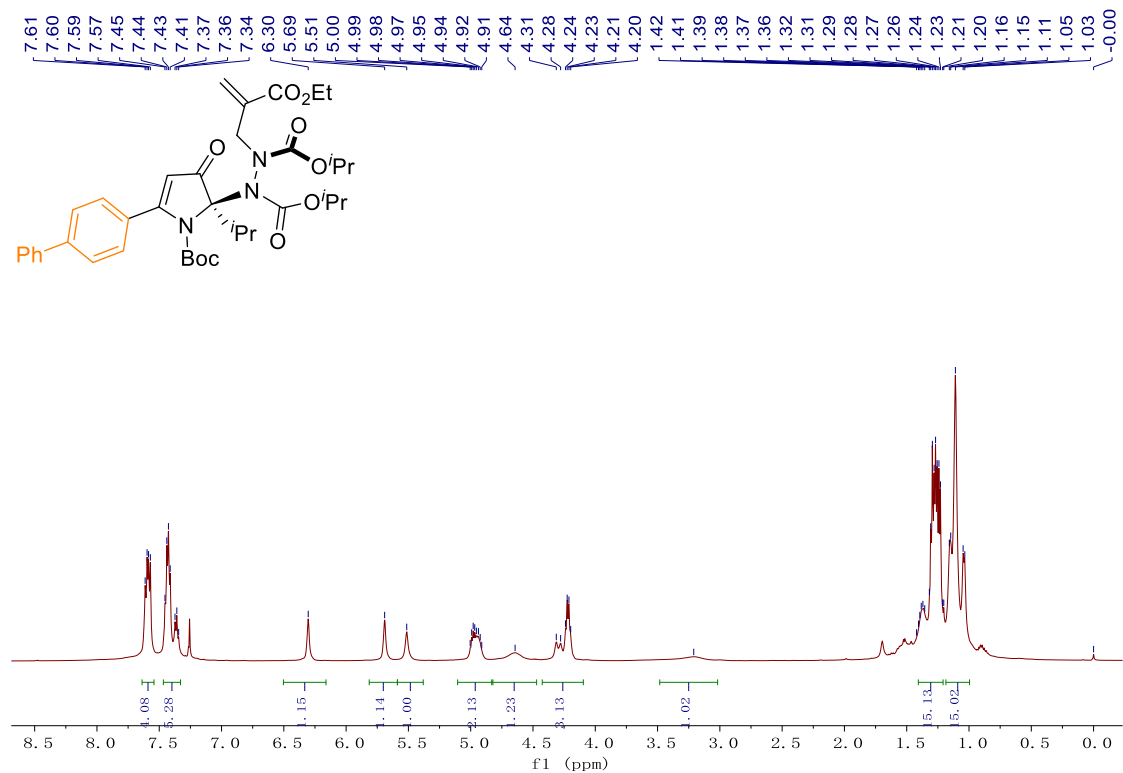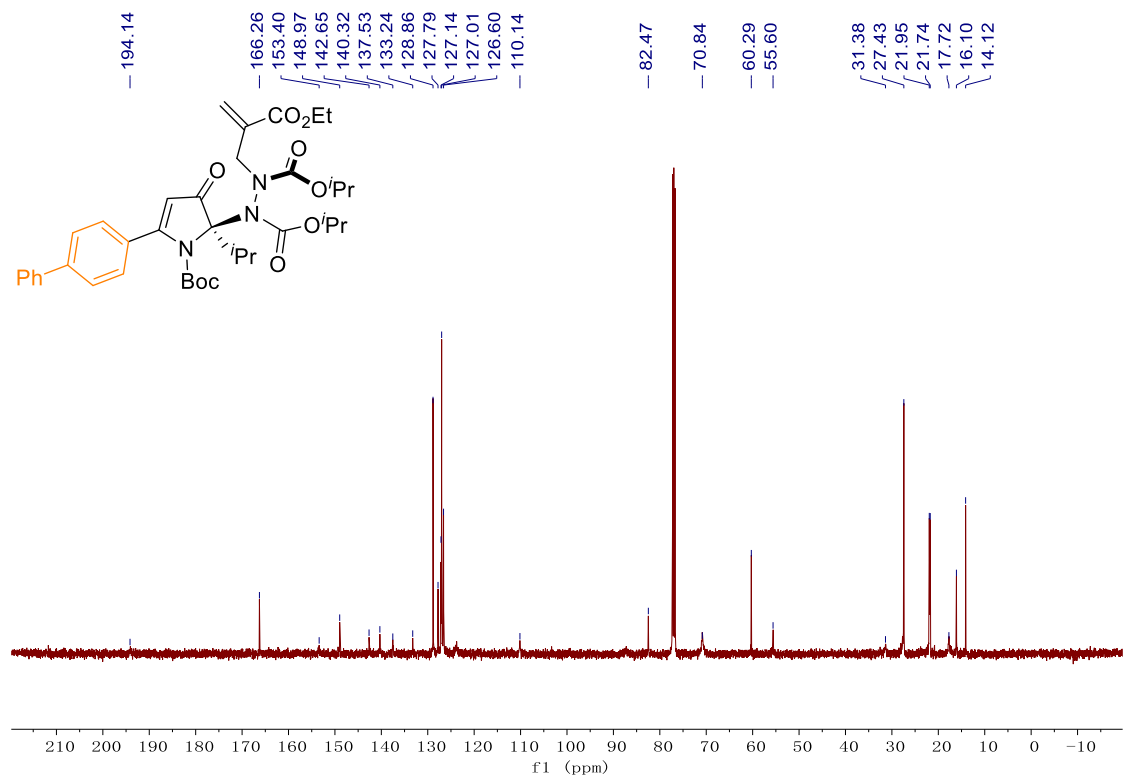

**diisopropyl (R,R)-1-(1-(tert-butoxycarbonyl)-5-(4-fluorophenyl)-2-isopropyl-3-oxo-2,3-dihydro-1H-pyrrol-2-yl)-2-(2-(ethoxycarbonyl)allyl)hydrazine-1,2-dicarboxylate (6l)**

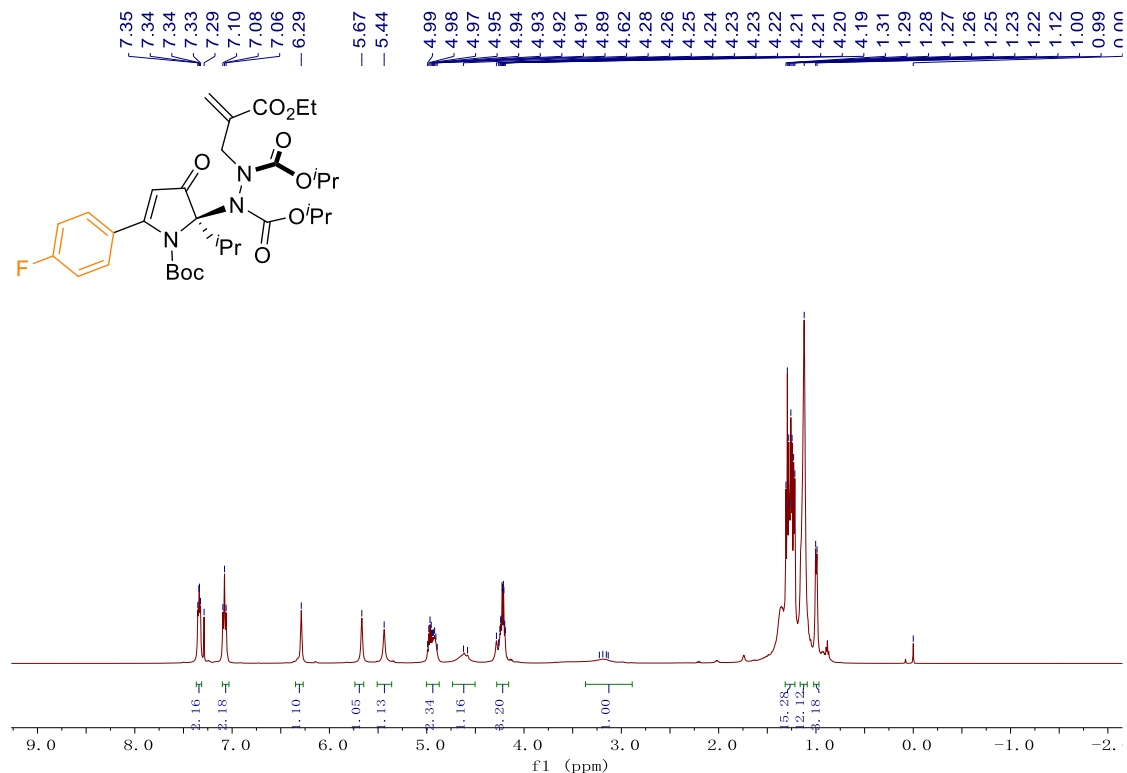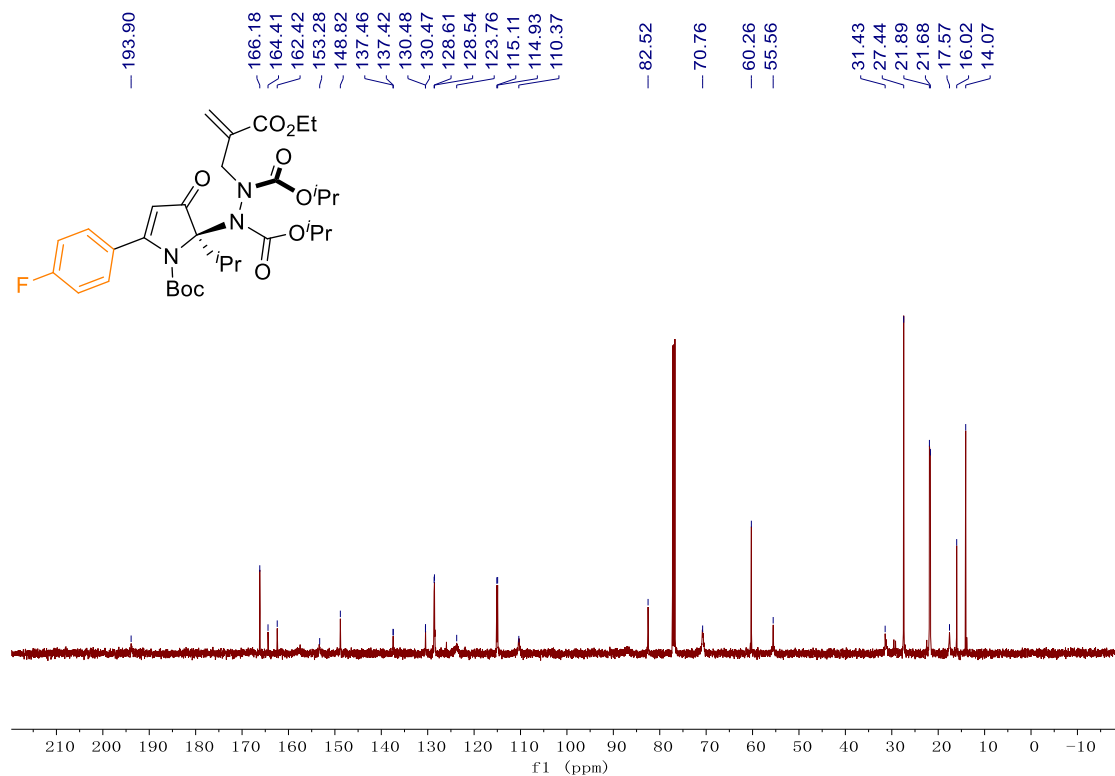

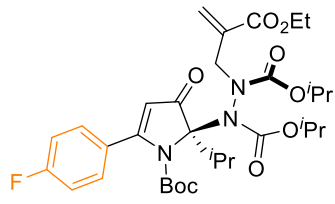

--112.50

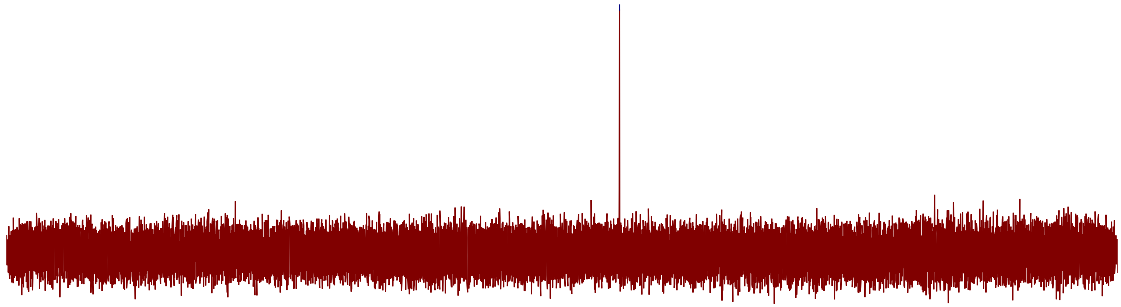

20 0 -20 -40 -60 -80 -100 -120 -140 -160 -180 -200 -2  
f1 (ppm)

**diisopropyl (*R,R*)-1-(1-(tert-butoxycarbonyl)-2-isopropyl-3-oxo-5-(4-(trifluoromethyl)phenyl)-2,3-dihydro-1H-pyrrol-2-yl)-2-(2-(ethoxycarbonyl)allyl)hydrazine-1,2-dicarboxylate (6m)**

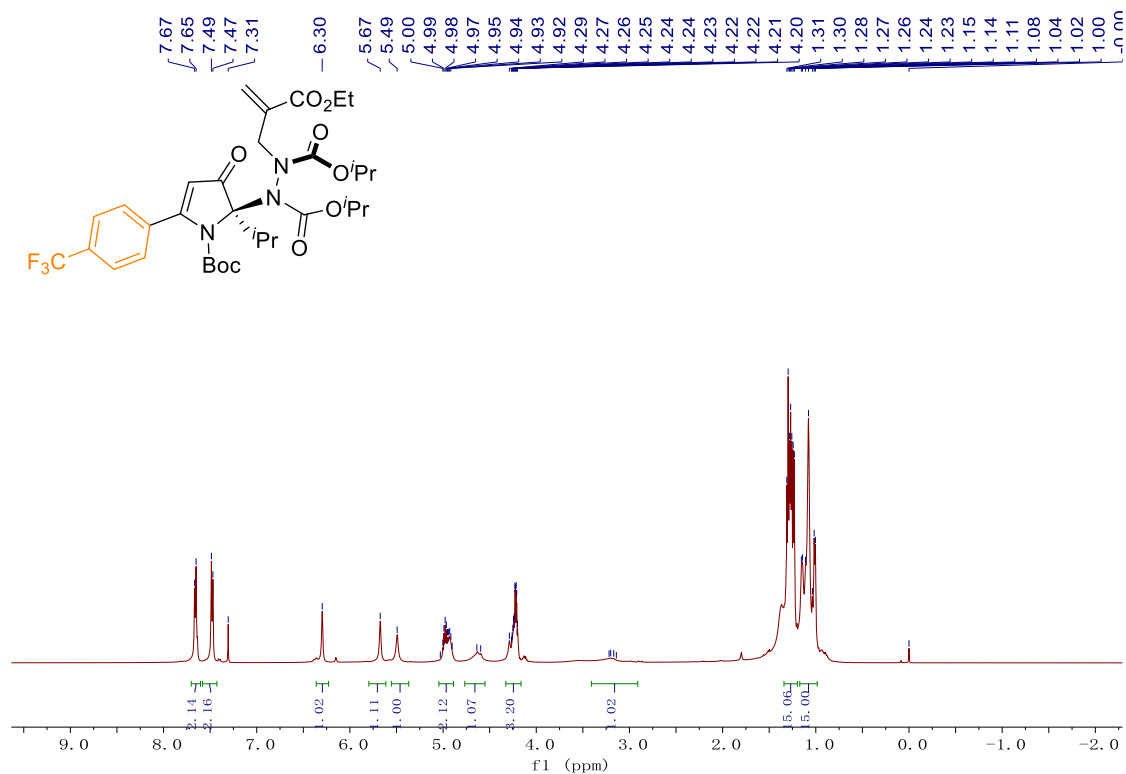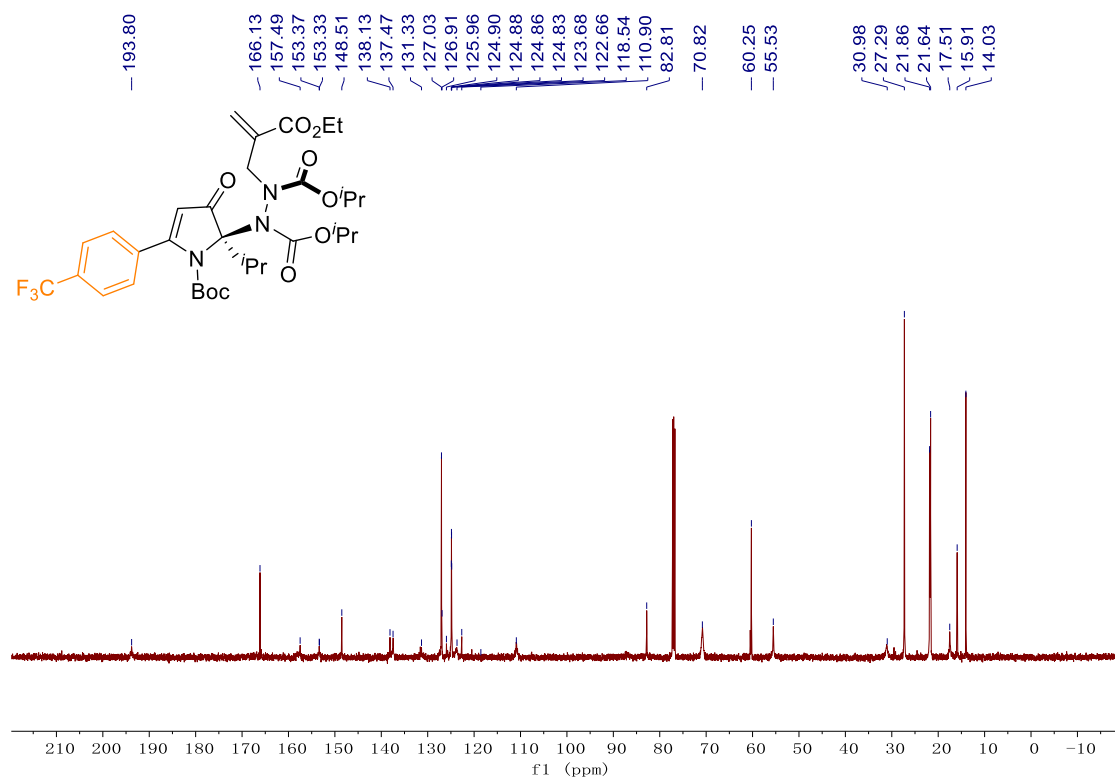



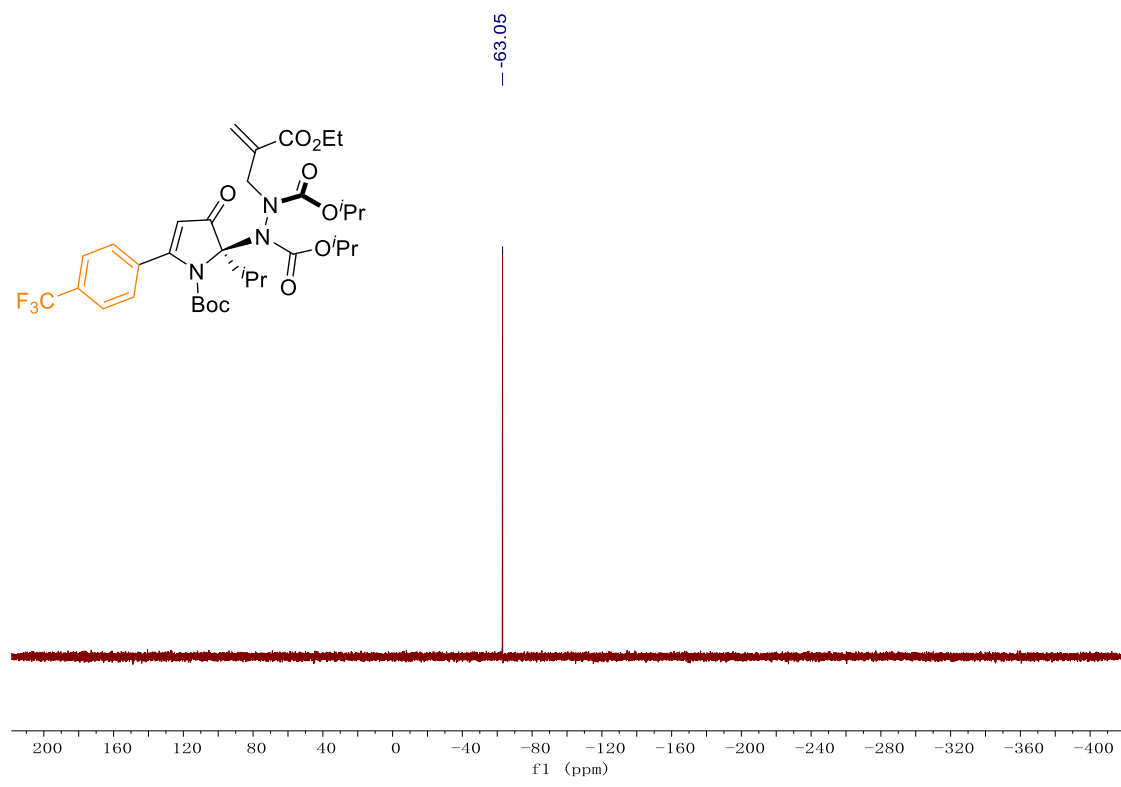

**diisopropyl (R,R)-1-(1-(tert-butoxycarbonyl)-2-isopropyl-3-oxo-5-phenyl-2,3-dihydro-1H-pyrrol-2-yl)-2-(2-(methoxycarbonyl)allyl)hydrazine-1,2-dicarboxylate (6n)**

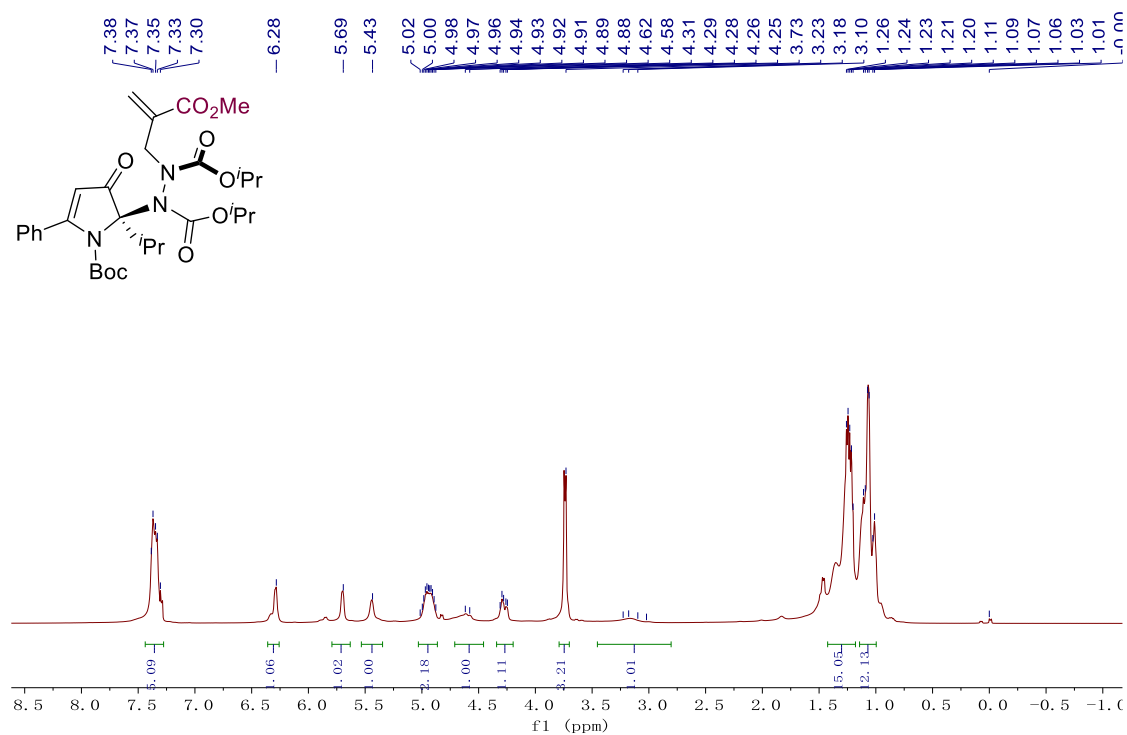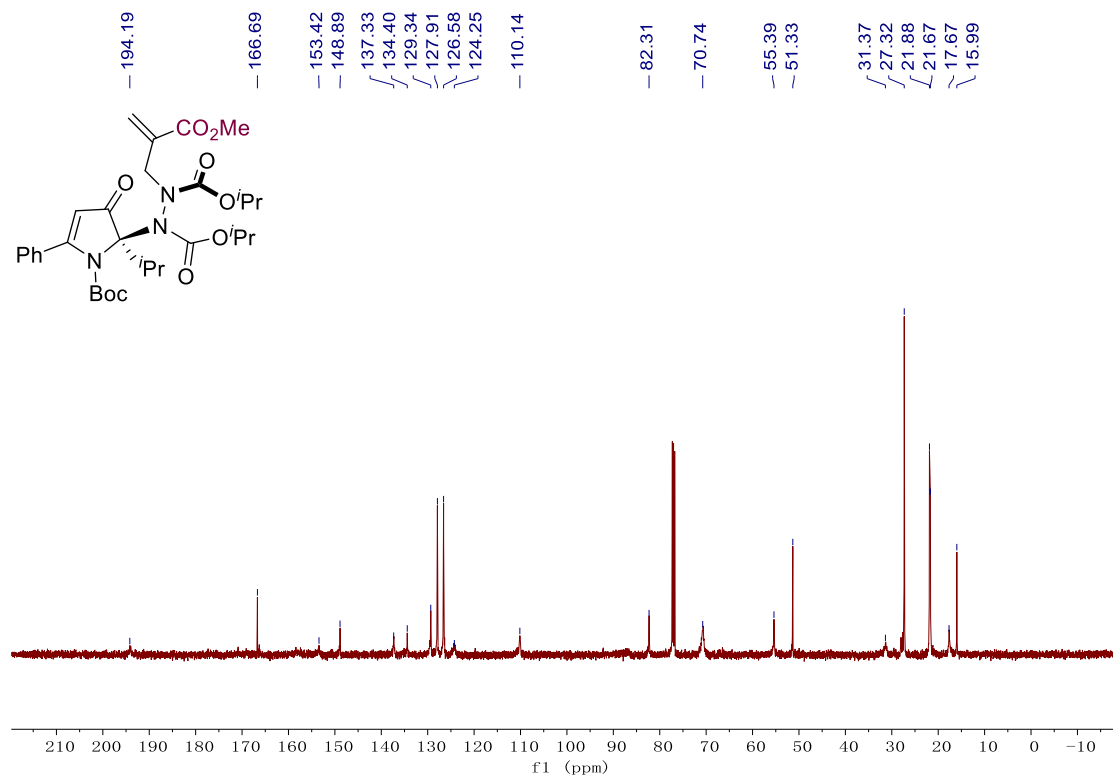

**diisopropyl (R, R)-1-(1-(tert-butoxycarbonyl)-2-isopropyl-3-oxo-5-phenyl-2,3-dihydro-1H-pyrrol-2-yl)-2-(2-(isopropoxycarbonyl)allyl)hydrazine-1,2-dicarboxylate (60)**

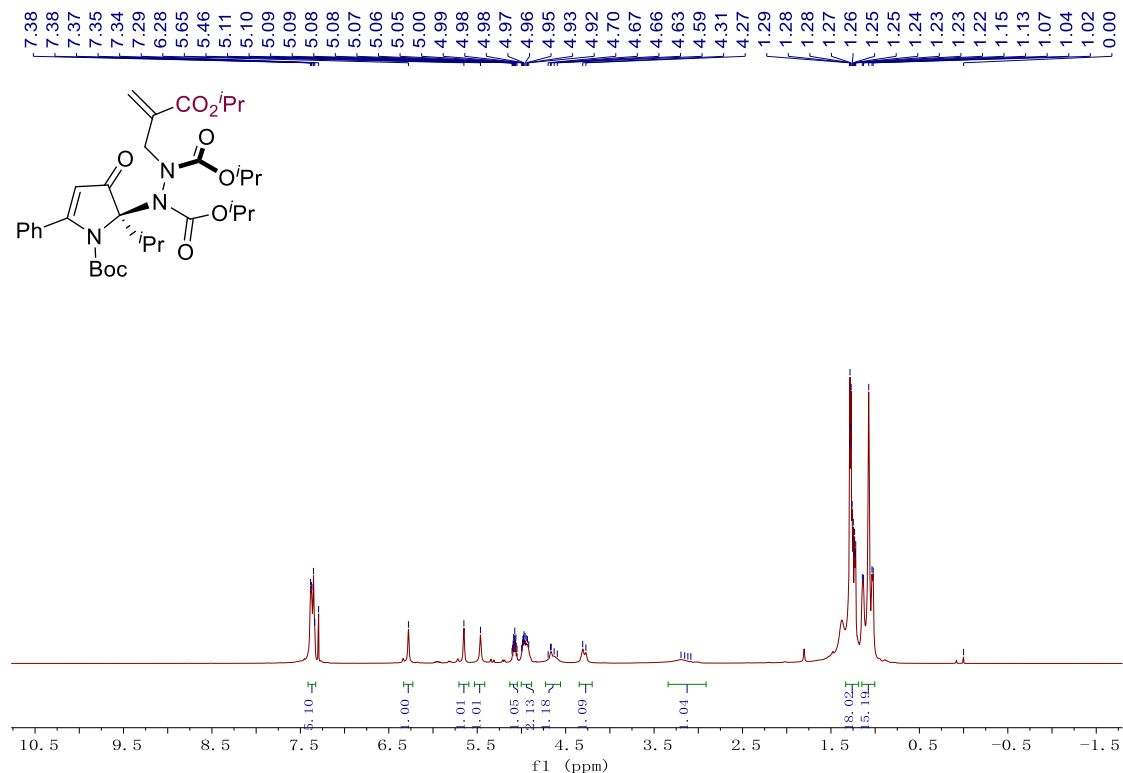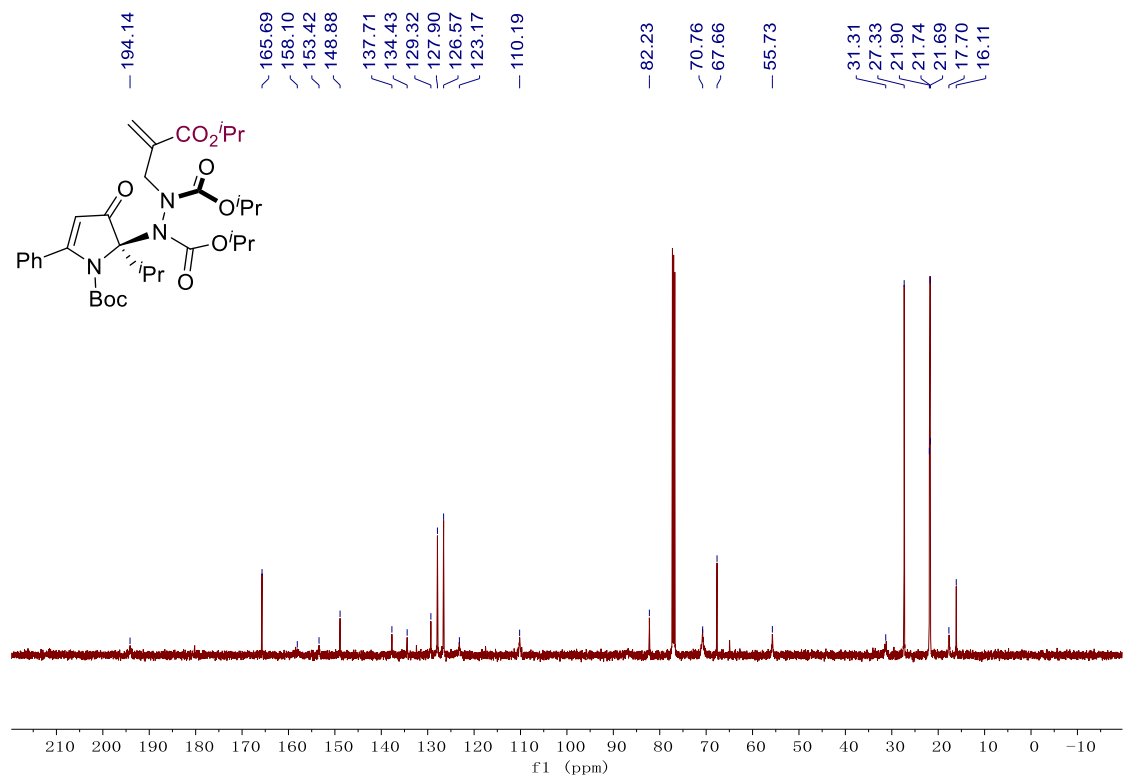

**diisopropyl (R, R)-1-(2-((allyloxy)carbonyl)allyl)-2-(1-(tert-butoxycarbonyl)-2-isopropyl-3-oxo-5-phenyl-2,3-dihydro-1H-pyrrol-2-yl)hydrazine-1,2-dicarboxylate (6p)**

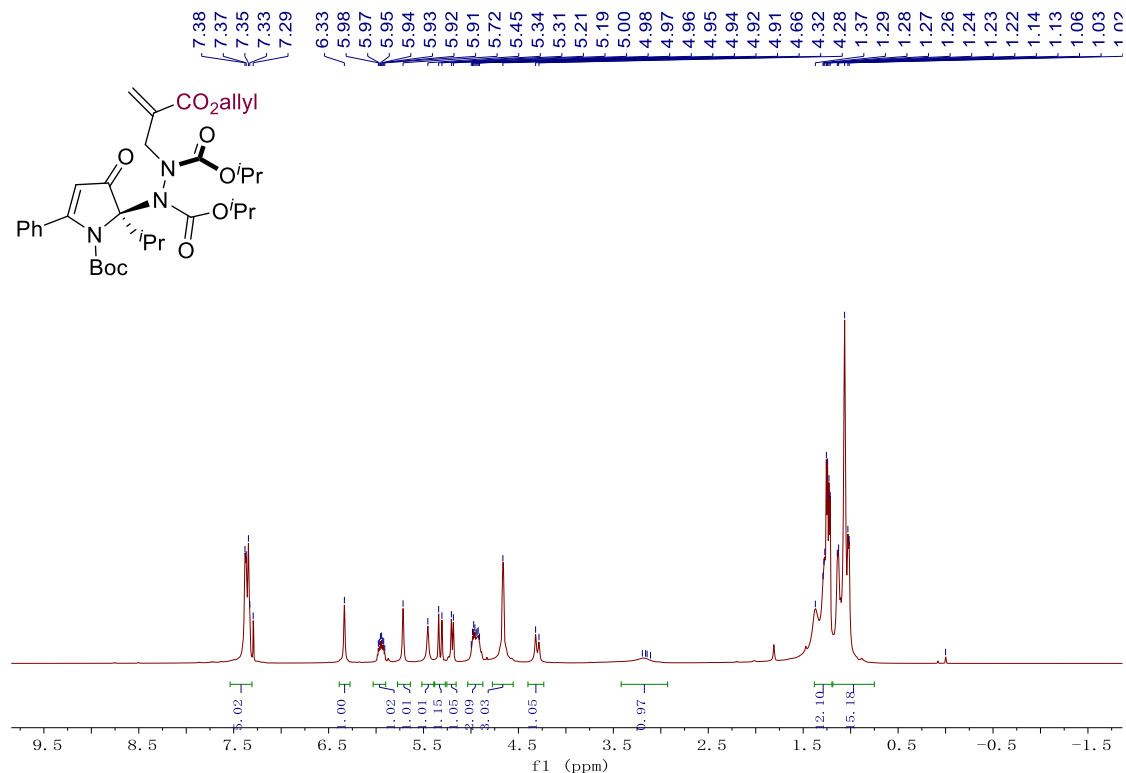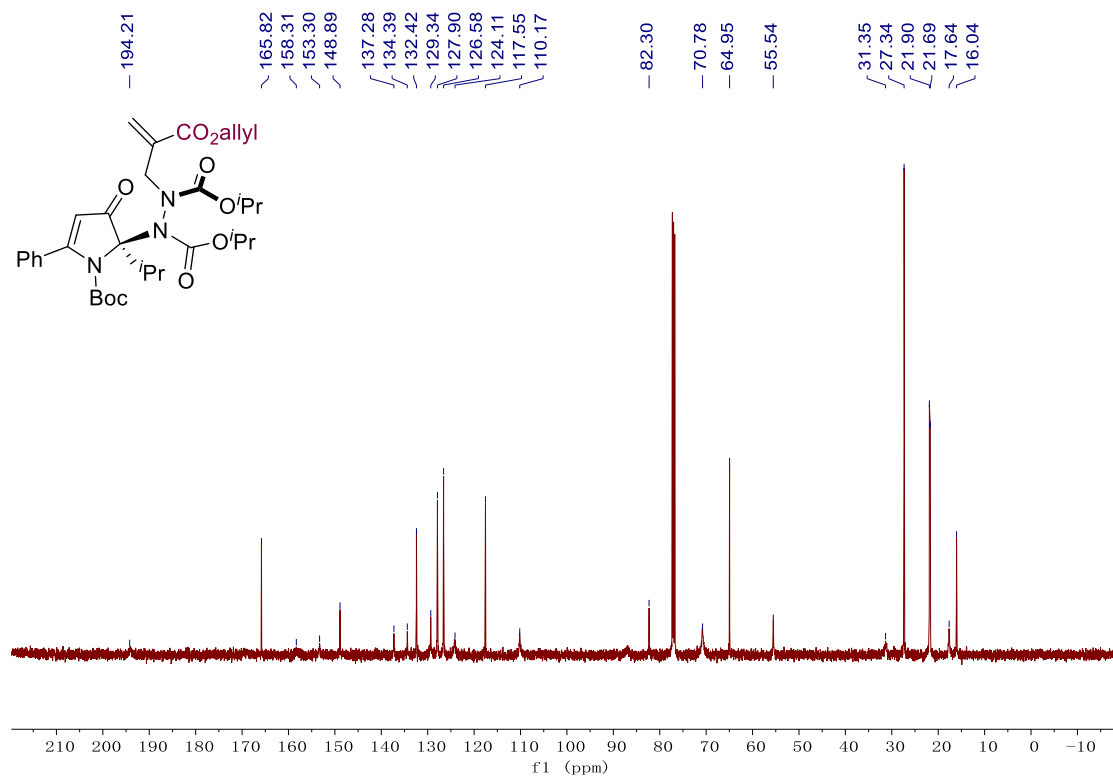

**diisopropyl (R, R)-1-(1-(tert-butoxycarbonyl)-2-cyclopentyl-3-oxo-5-phenyl-2,3-dihydro-1H-pyrrol-2-yl)-2-(2-(ethoxycarbonyl)allyl)hydrazine-1,2-dicarboxylate (6q)**

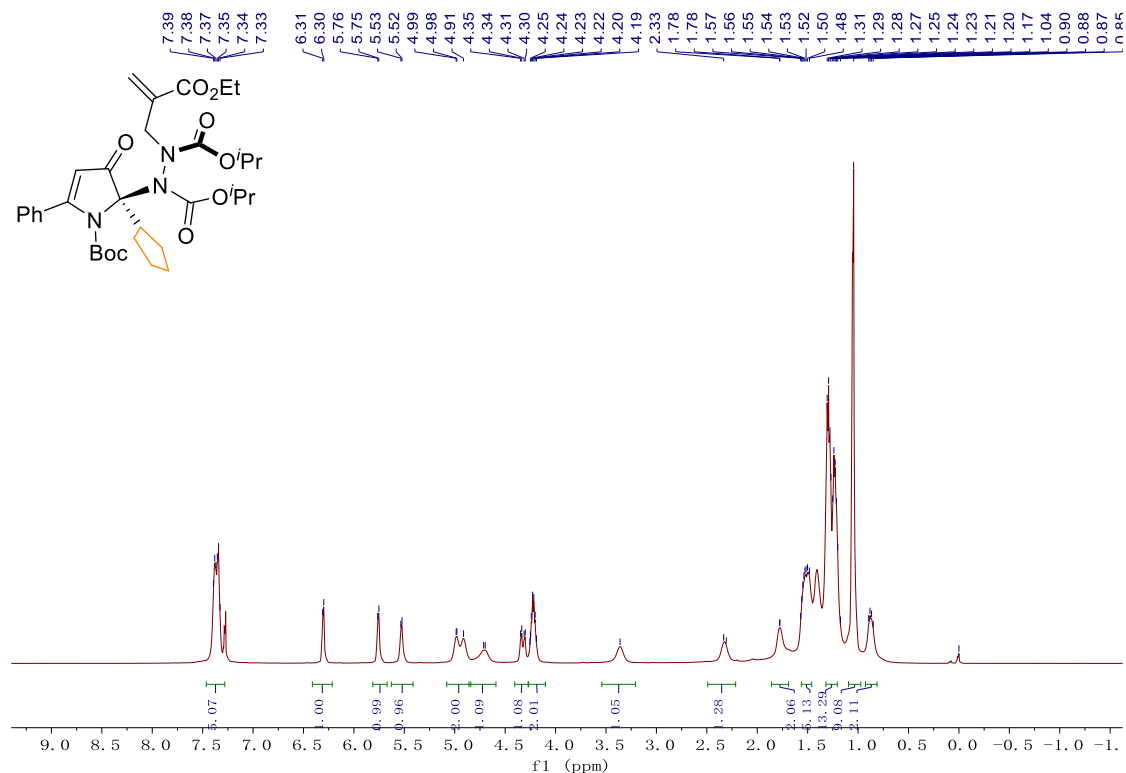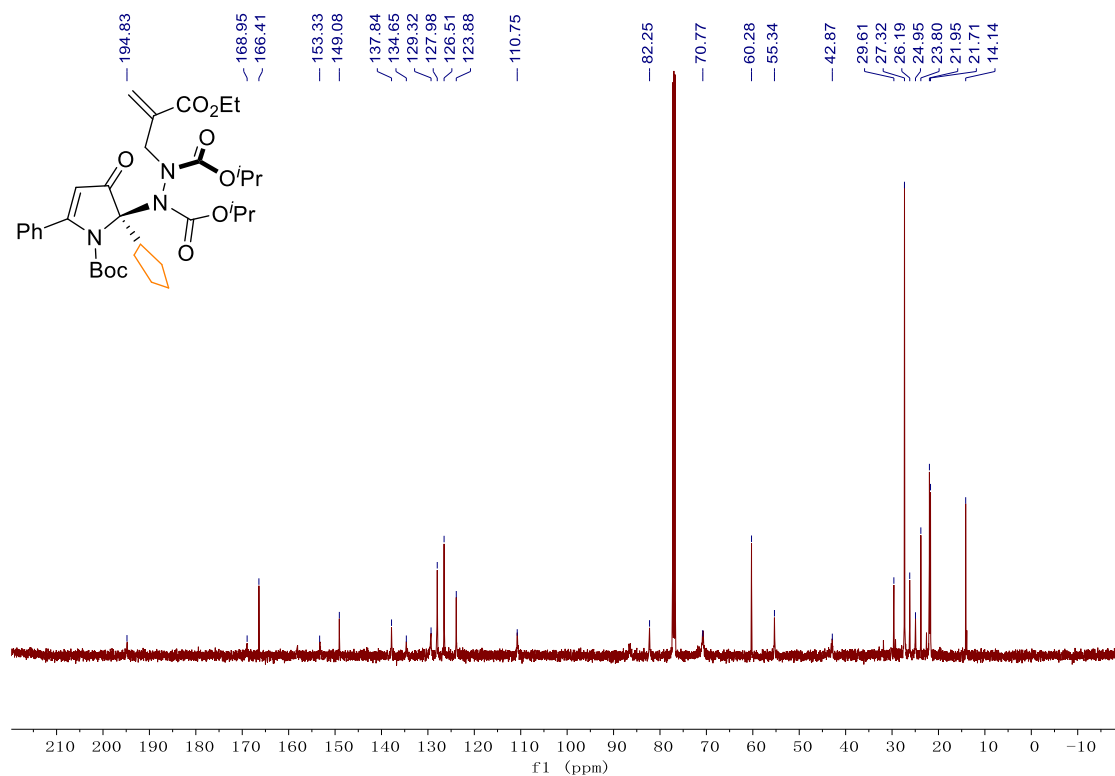

**diisopropyl (R, R)-1-(1-(tert-butoxycarbonyl)-2-cyclohexyl-3-oxo-5-phenyl-2,3-dihydro-1H-pyrrol-2-yl)-2-(2-(ethoxycarbonyl)allyl)hydrazine-1,2-dicarboxylate (6r)**

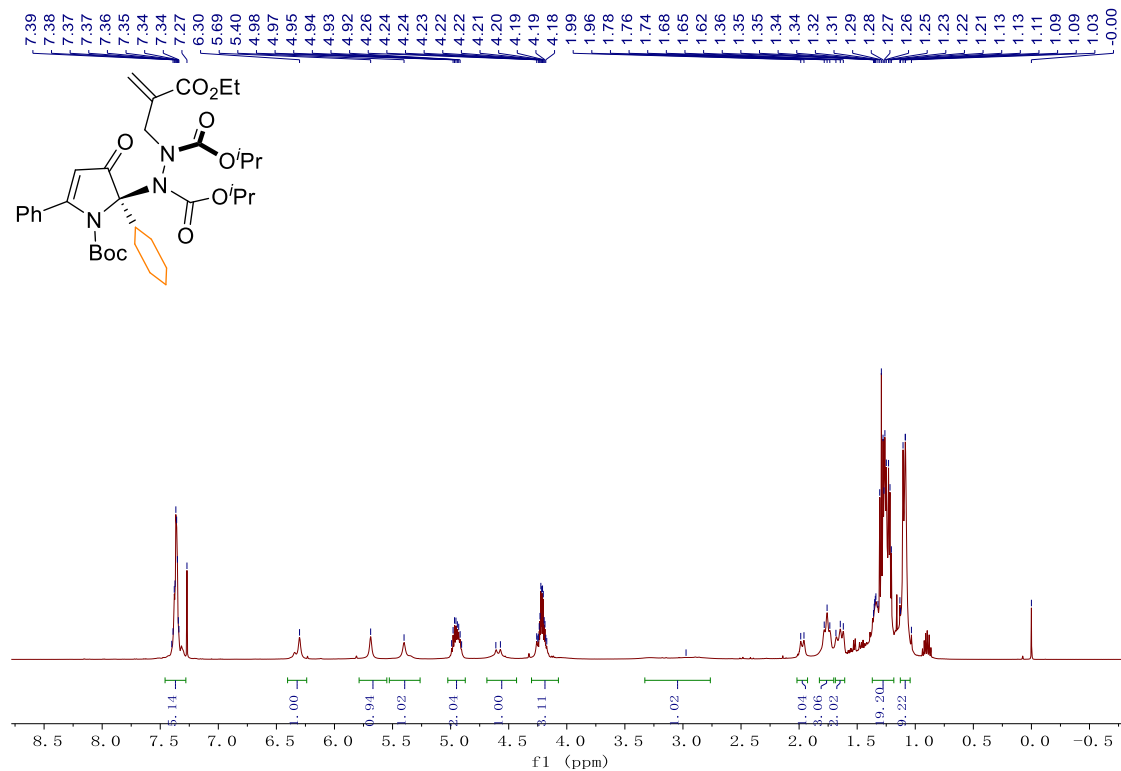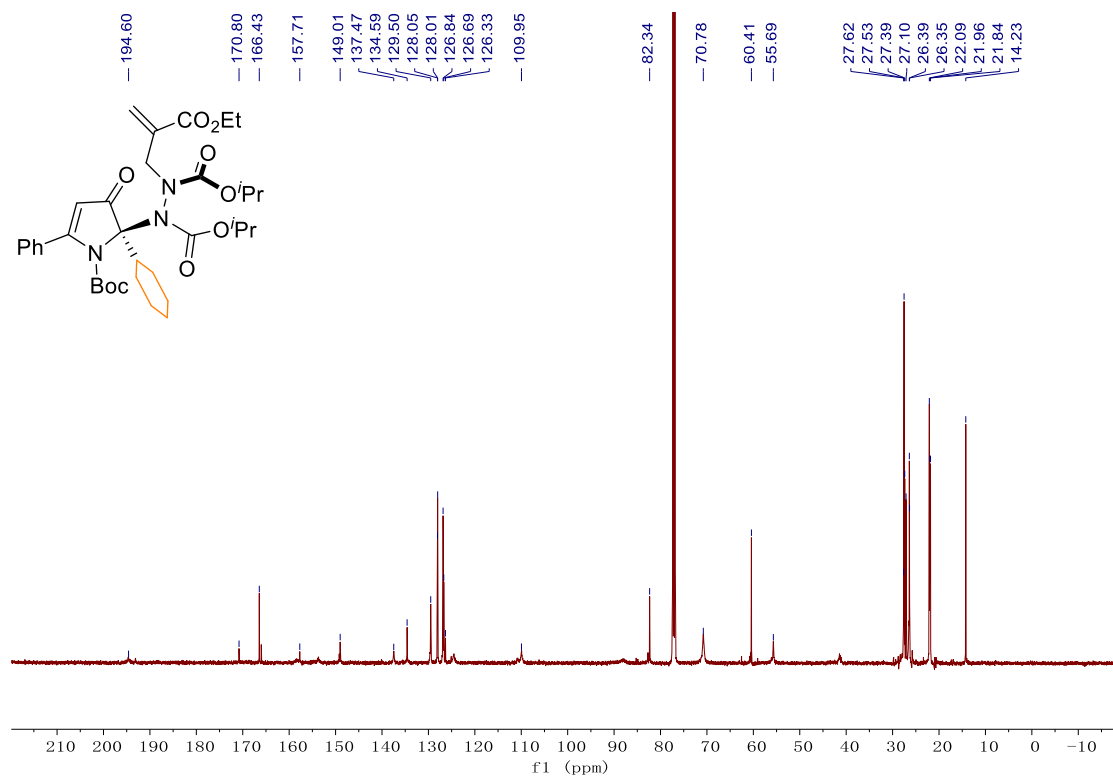

**diisopropyl (R, R)-1-(1-(tert-butoxycarbonyl)-3-oxo-5-phenyl-2-propyl-2,3-dihydro-1H-pyrrol-2-yl)-2-(2-(ethoxycarbonyl)allyl)hydrazine-1,2-dicarboxylate (6s)**

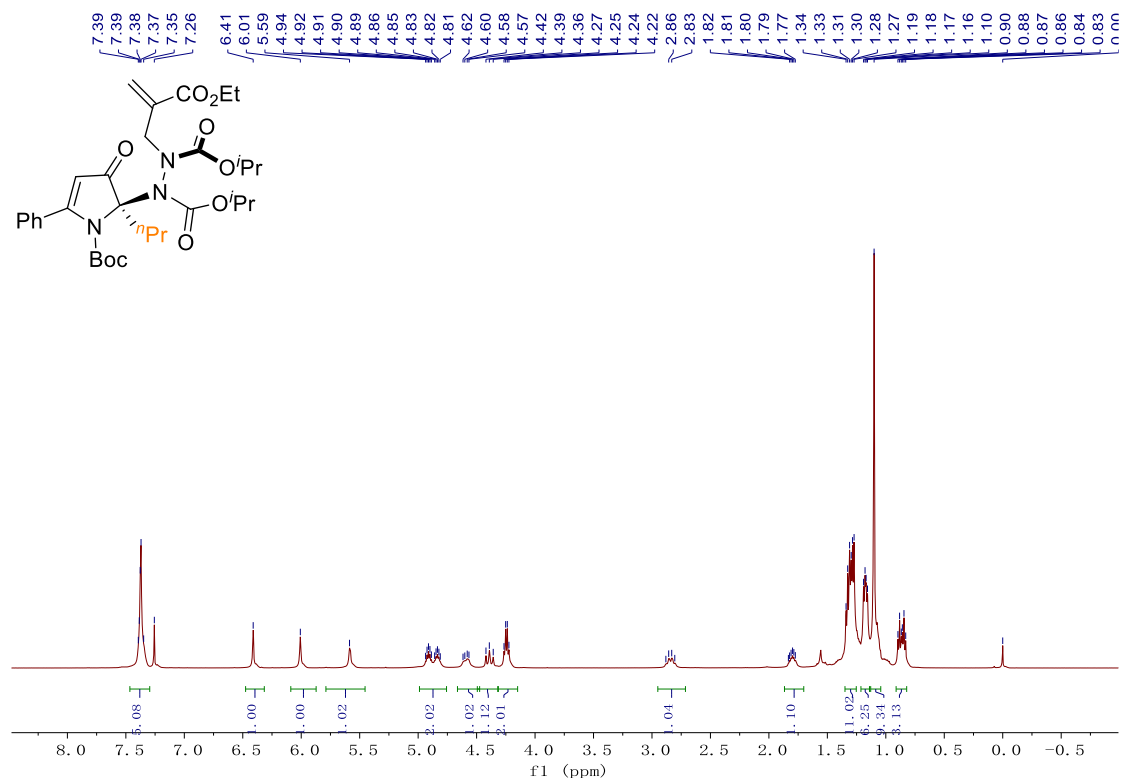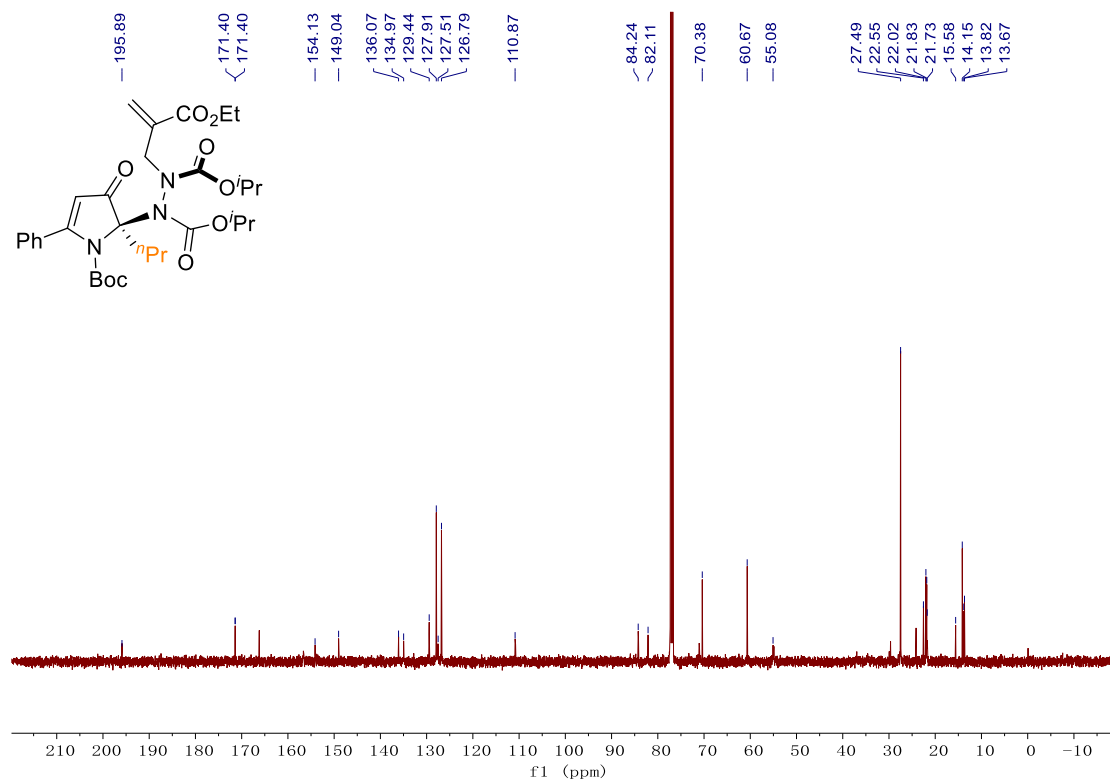

**diisopropyl (R, R)-1-(1-(tert-butoxycarbonyl)-2-(4-nitrobenzyl)-3-oxo-5-phenyl-2,3-dihydro-1H-pyrrol-2-yl)-2-(2-(ethoxycarbonyl)allyl)hydrazine-1,2-dicarboxylate (6t)**

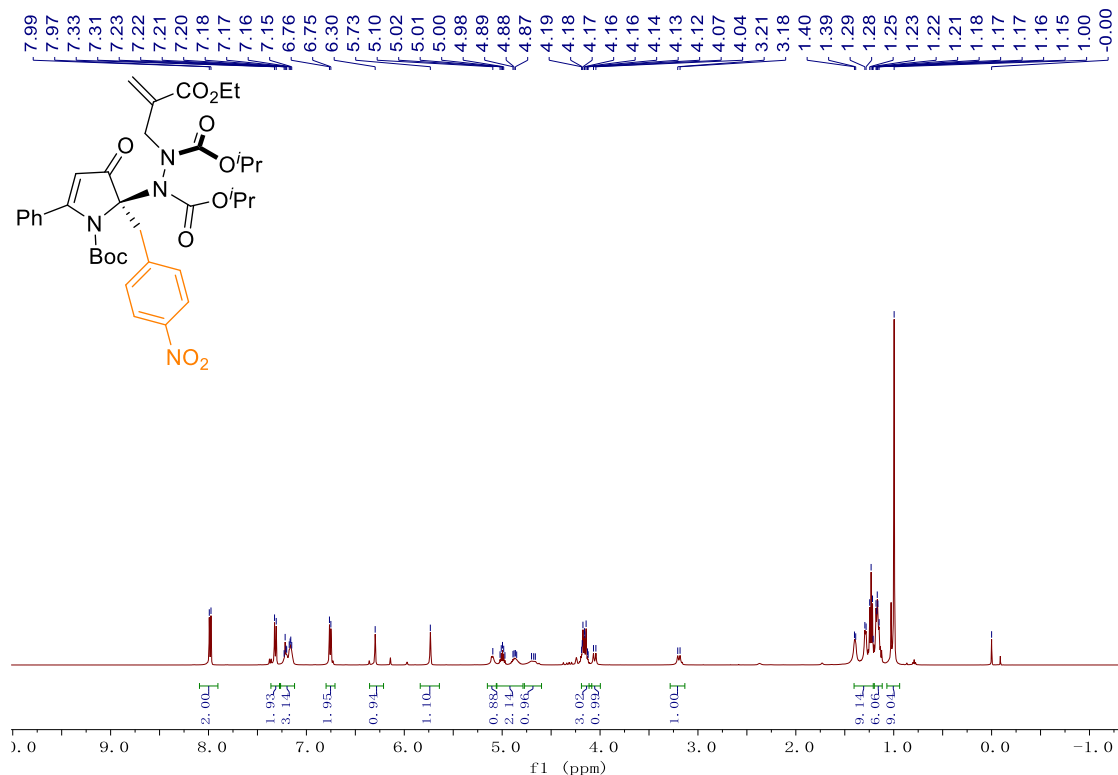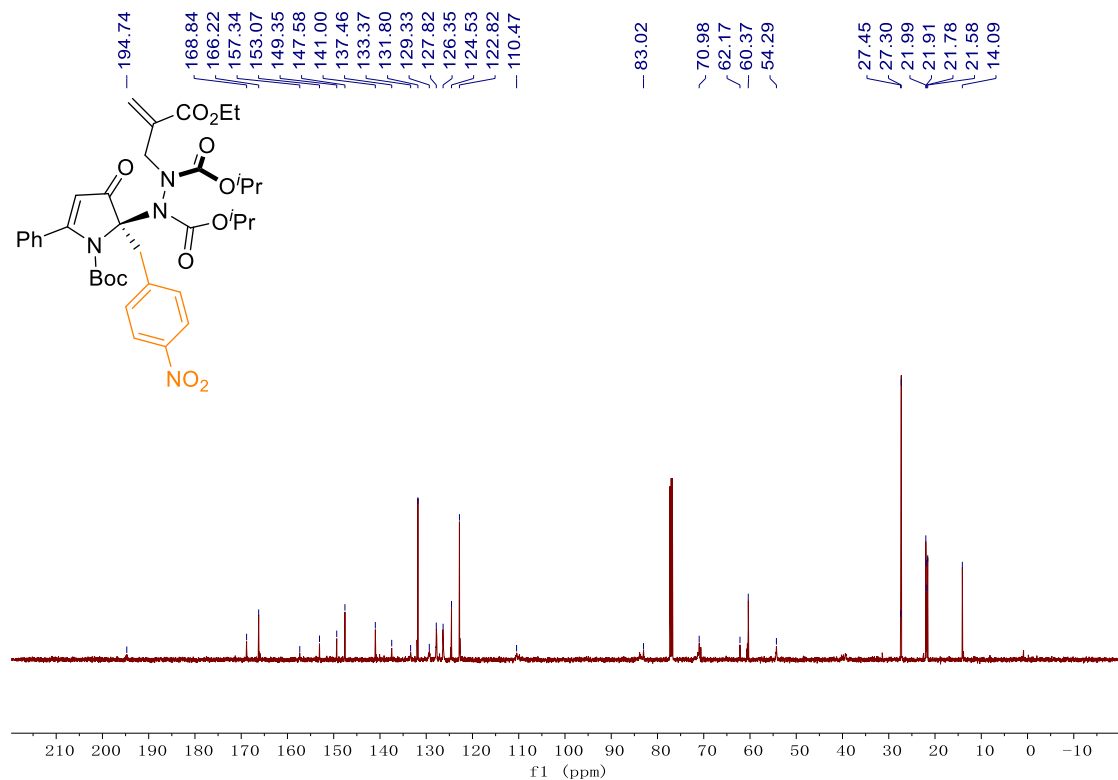



**diisopropyl (R, R)-1-(1-(tert-butoxycarbonyl)-3-oxo-2,5-diphenyl-2,3-dihydro-1H-pyrrol-2-yl)-2-(2-(ethoxycarbonyl)allyl)hydrazine-1,2-dicarboxylate (6u)**

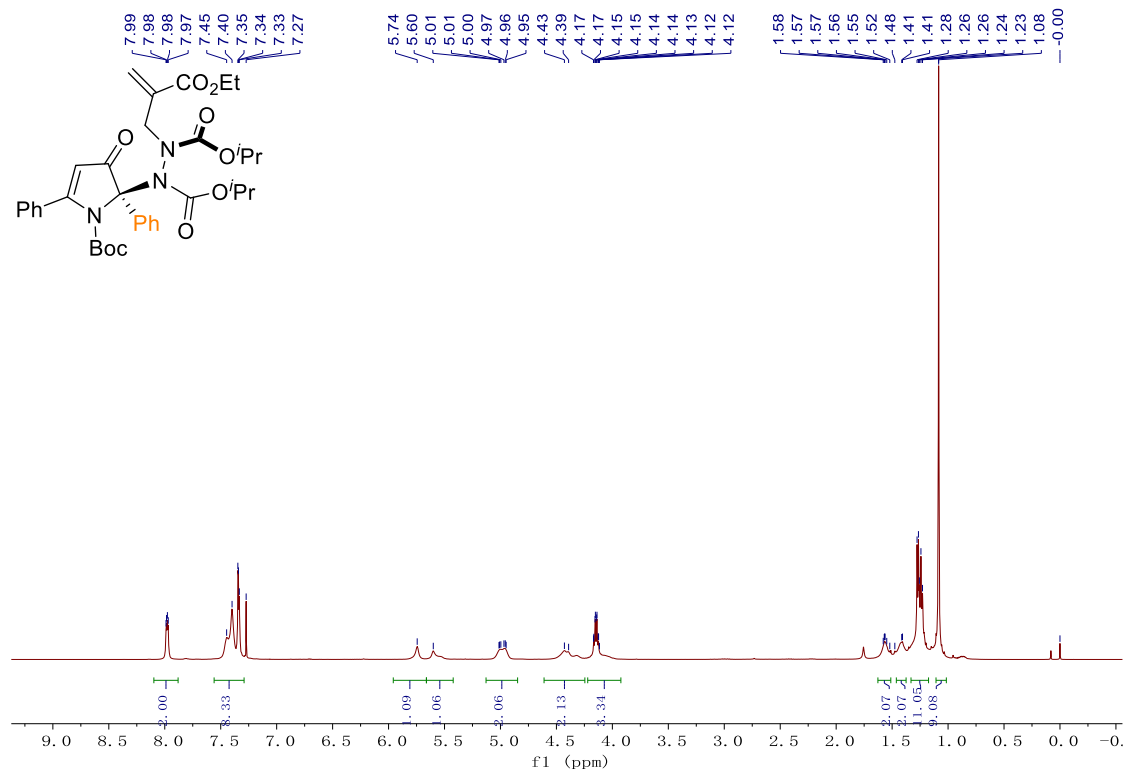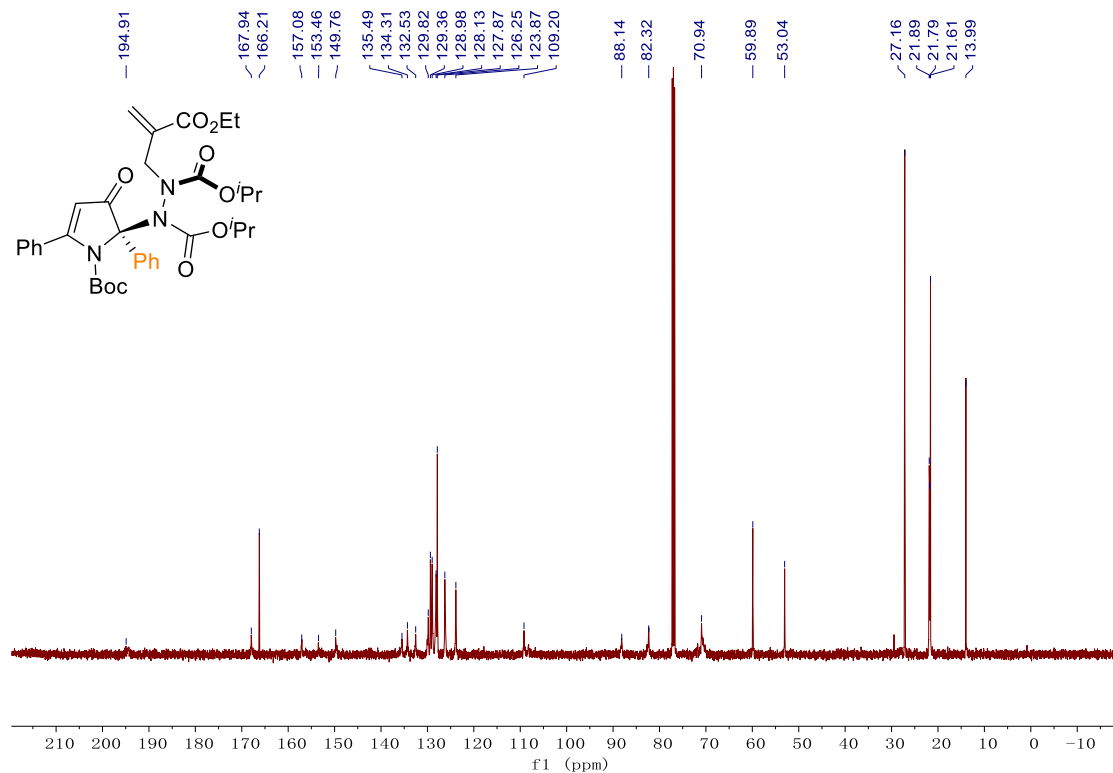

**diethyl (*R*)-1-(2-isopropyl-3-oxo-5-phenyl-2,3-dihydro-1H-pyrrol-2-yl)hydrazine-1,2-dicarboxylate (9)**

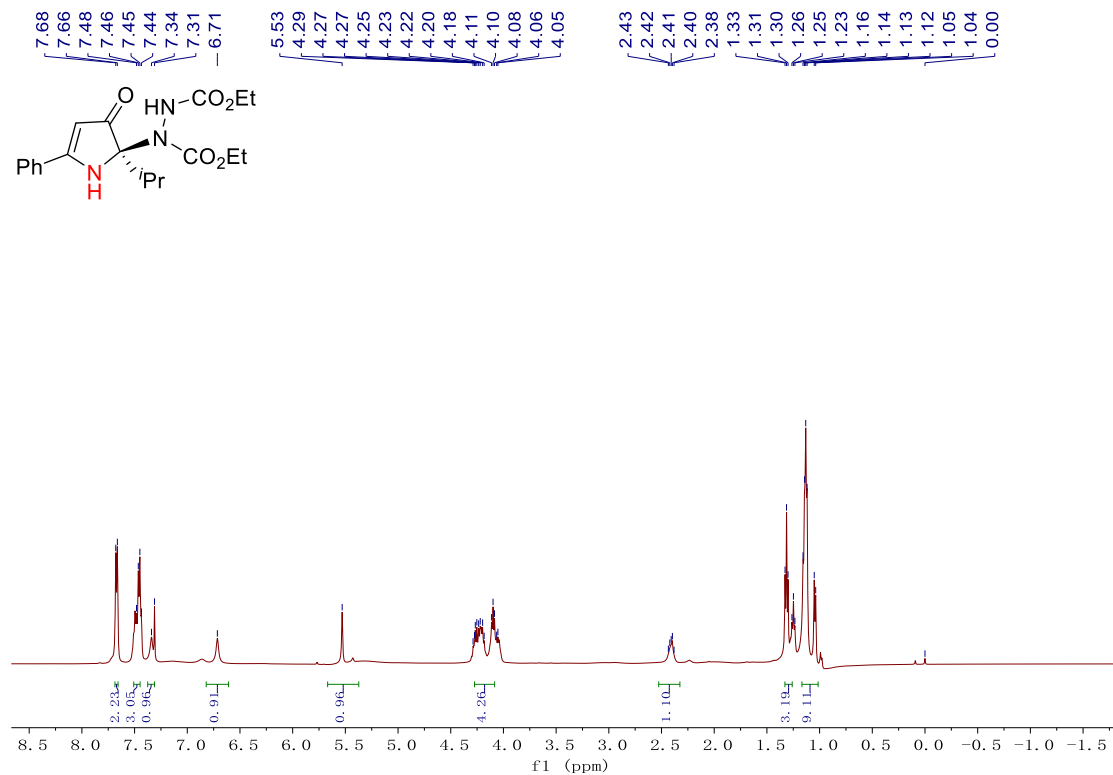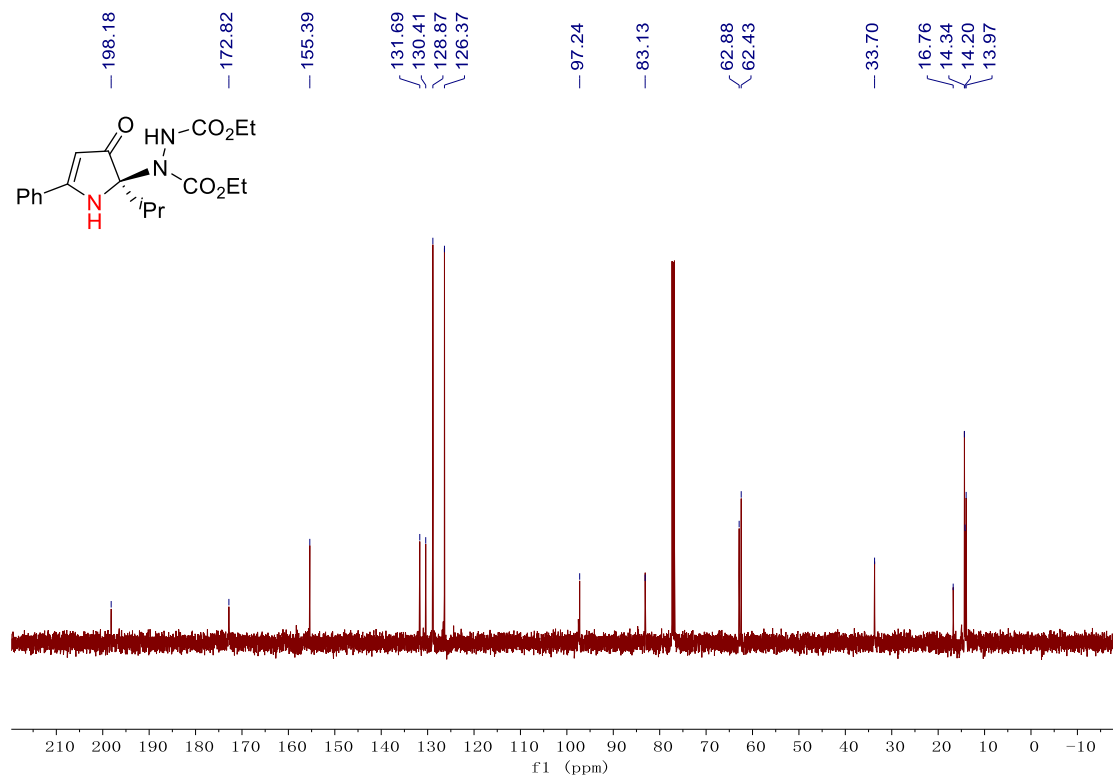

diethyl (*R*)-1-(4-bromo-1-(tert-butoxycarbonyl)-2-isopropyl-3-oxo-5-phenyl-2,3-dihydro-1H-pyrrol-2-yl)hydrazine-1,2-dicarboxylate (10)

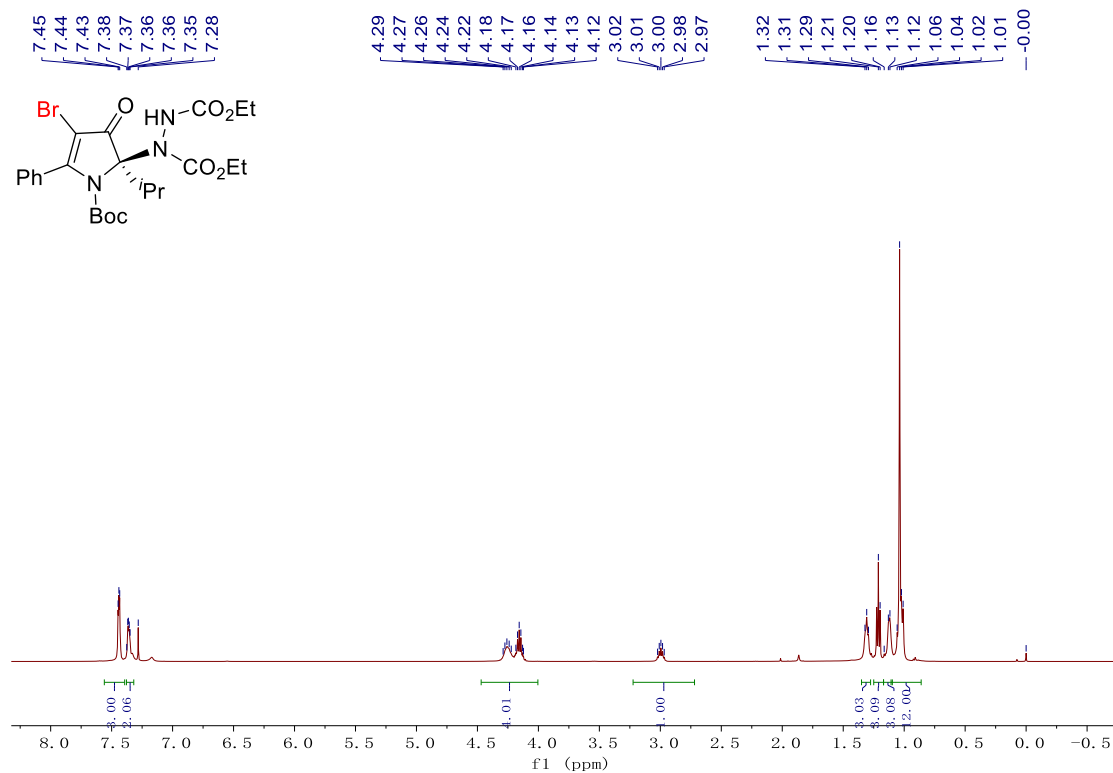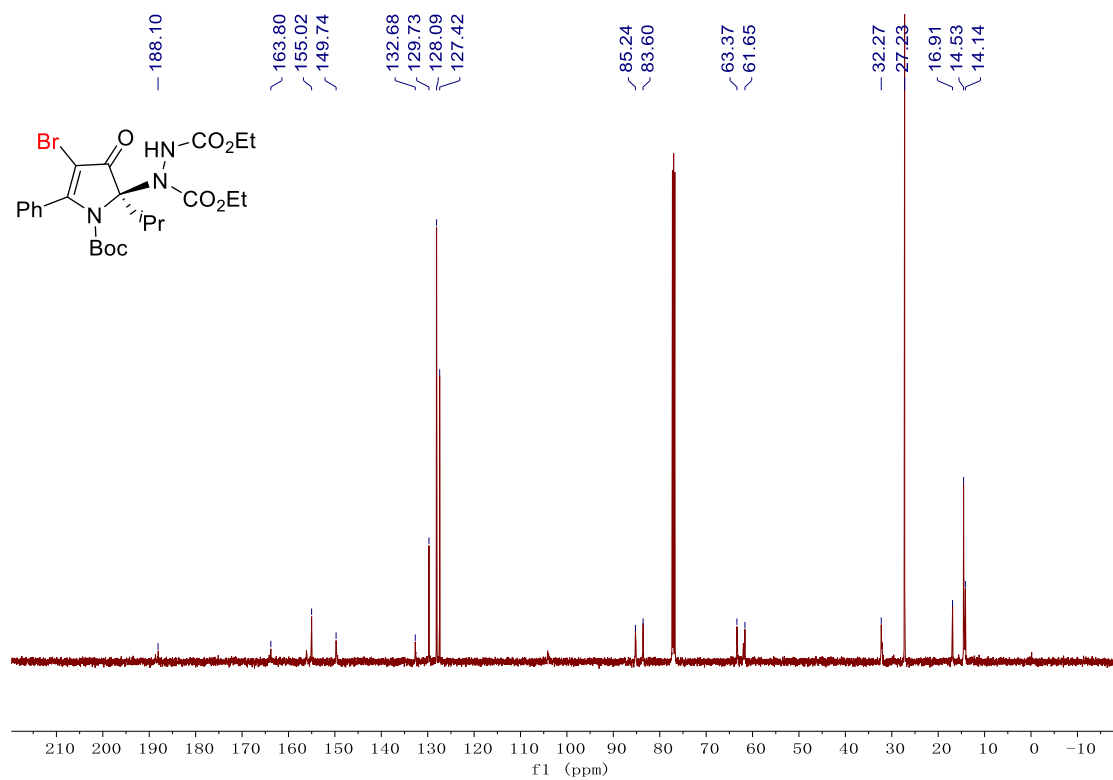

**diethyl (*R*)-1-(1-(tert-butoxycarbonyl)-4-iodo-2-isopropyl-3-oxo-5-phenyl-2,3-dihydro-1H-pyrrol-2-yl)hydrazine-1,2-dicarboxylate (11)**

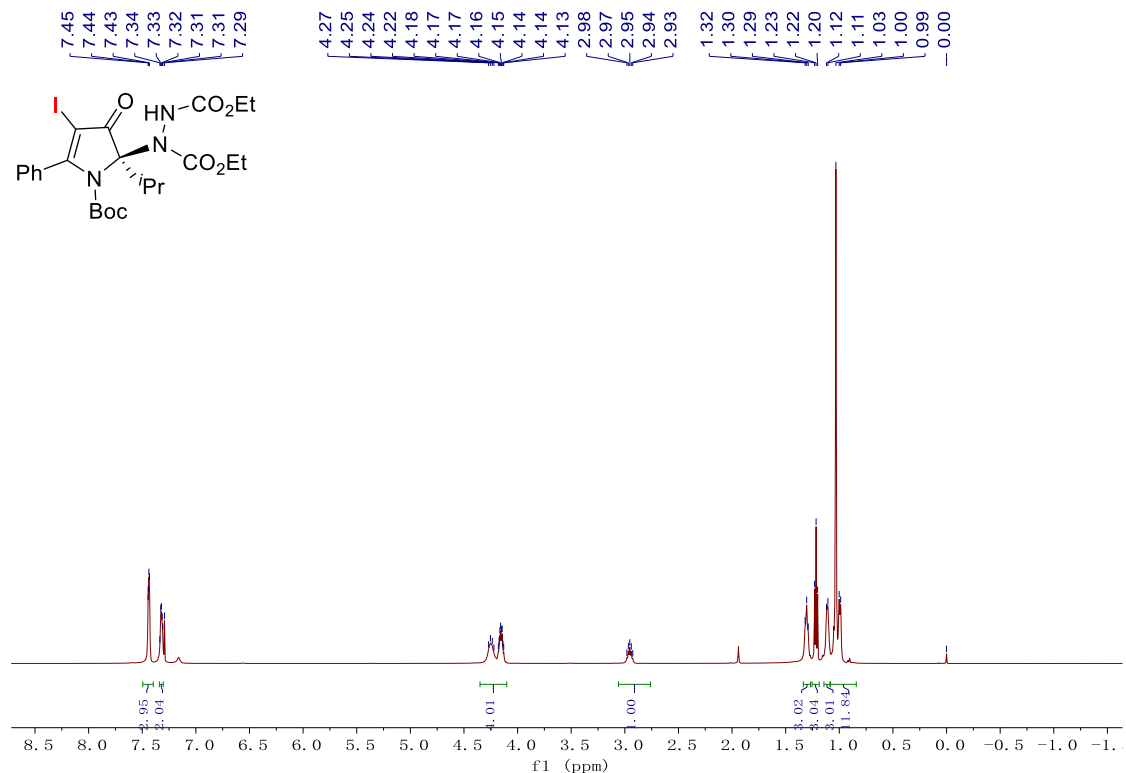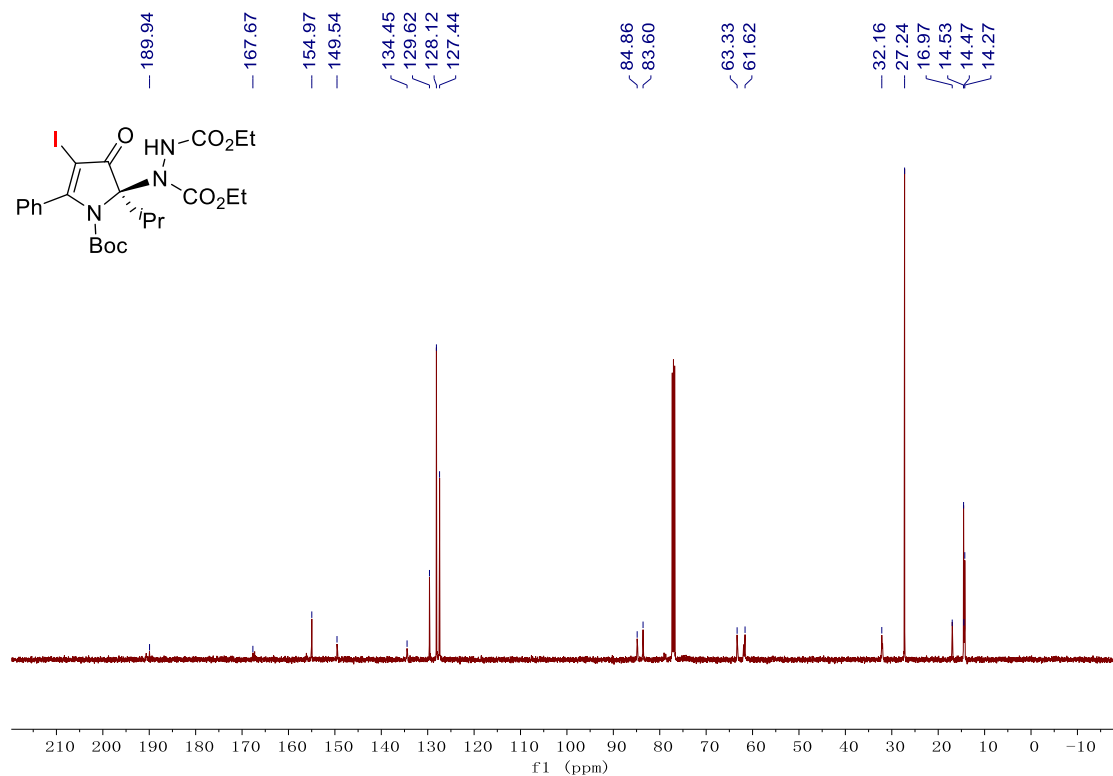

**diethyl (*R*)-1-(1-(tert-butoxycarbonyl)-2-isopropyl-3-oxo-4,5-diphenyl-2,3-dihydro-1H-pyrrol-2-yl)hydrazine-1,2-dicarboxylate (12)**

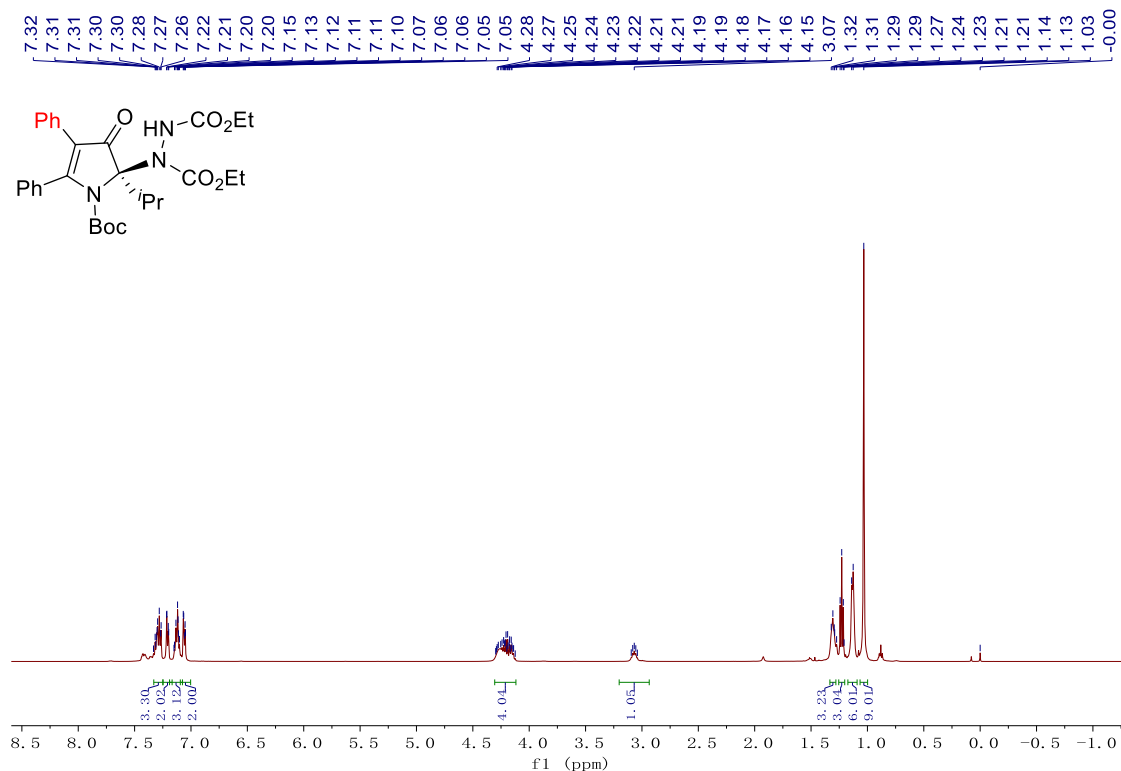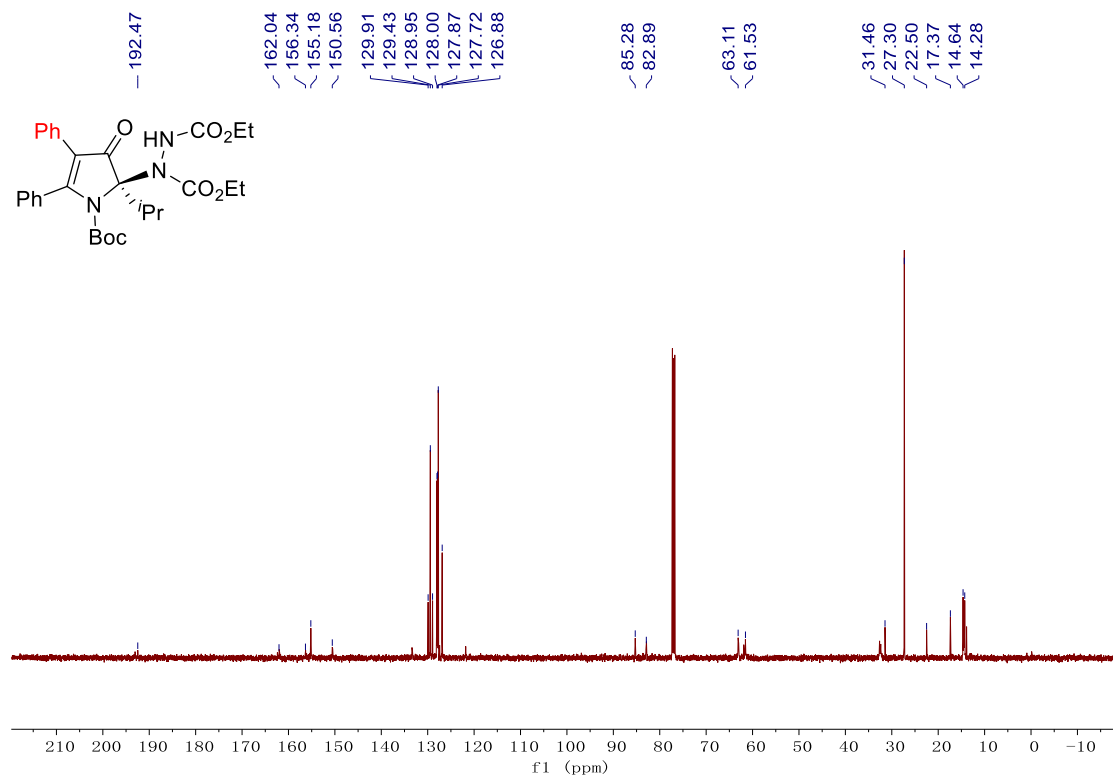

**diethyl (*R*)-1-(1-(tert-butoxycarbonyl)-4-ethynyl-2-isopropyl-3-oxo-5-phenyl-2,3-dihydro-1H-pyrrol-2-yl)hydrazine-1,2-dicarboxylate (**13**)**

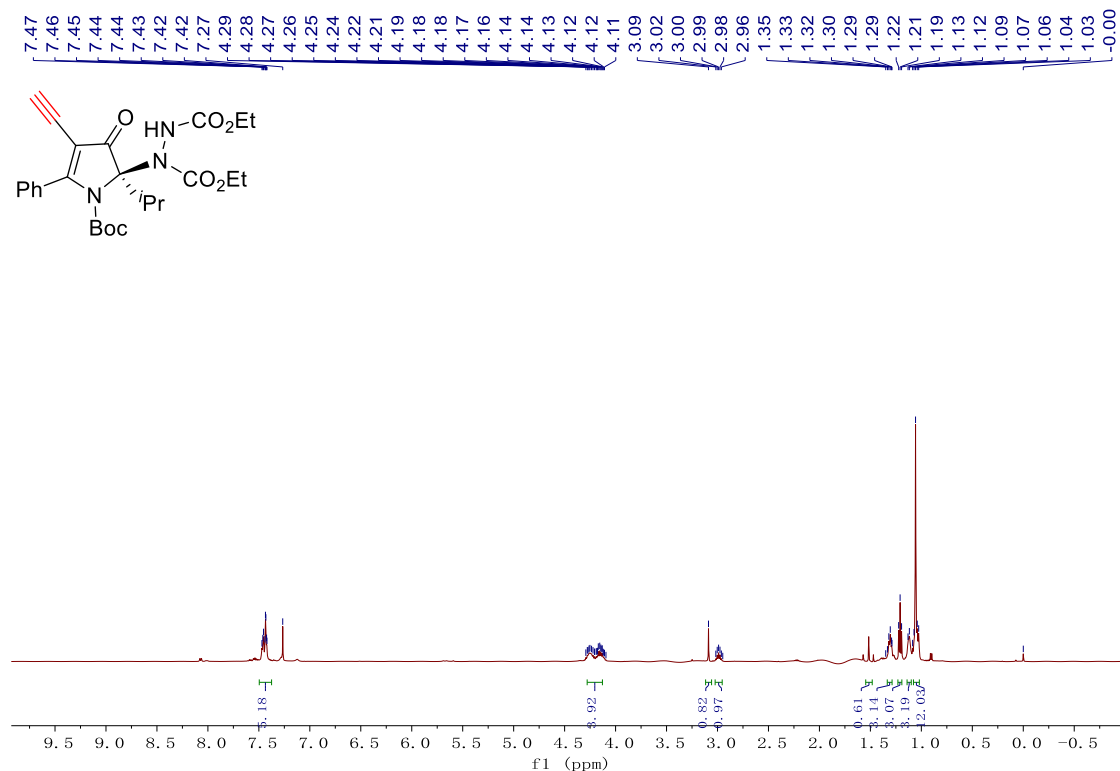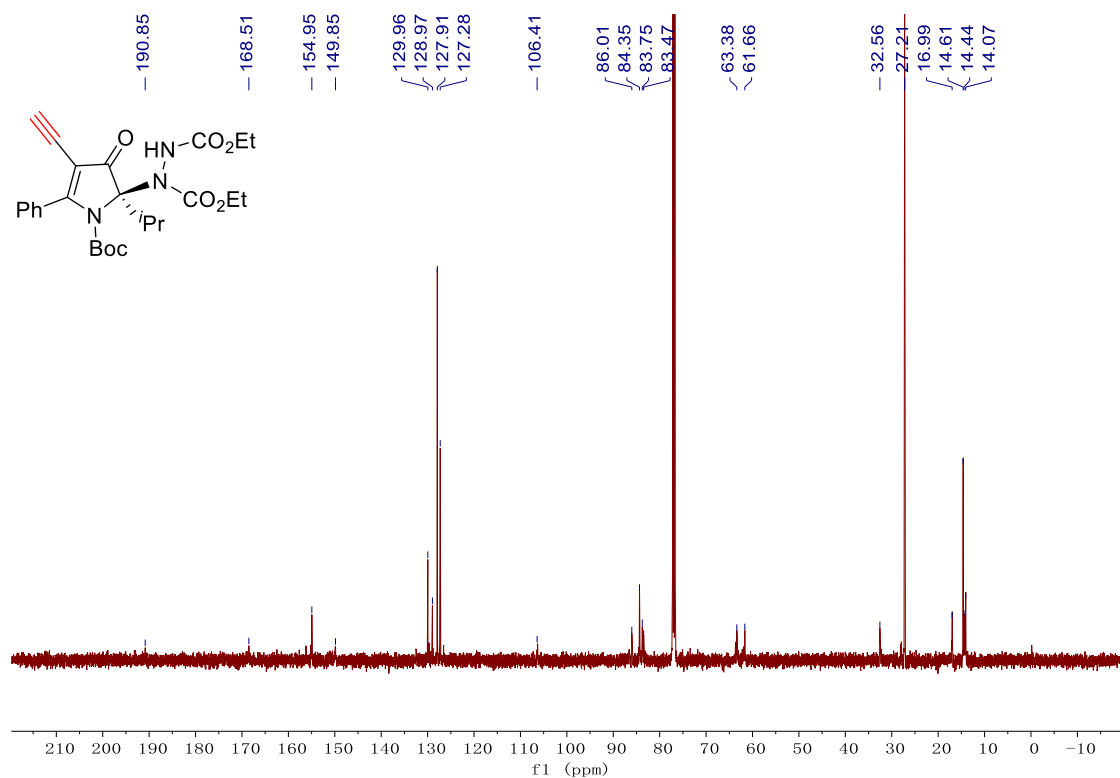

**diisopropyl (R, R)-1-(4-bromo-1-(tert-butoxycarbonyl)-2-isopropyl-3-oxo-5-phenyl-2,3-dihydro-1H-pyrrol-2-yl)-2-(2-(ethoxycarbonyl)allyl)hydrazine-1,2-dicarboxylate (14)**

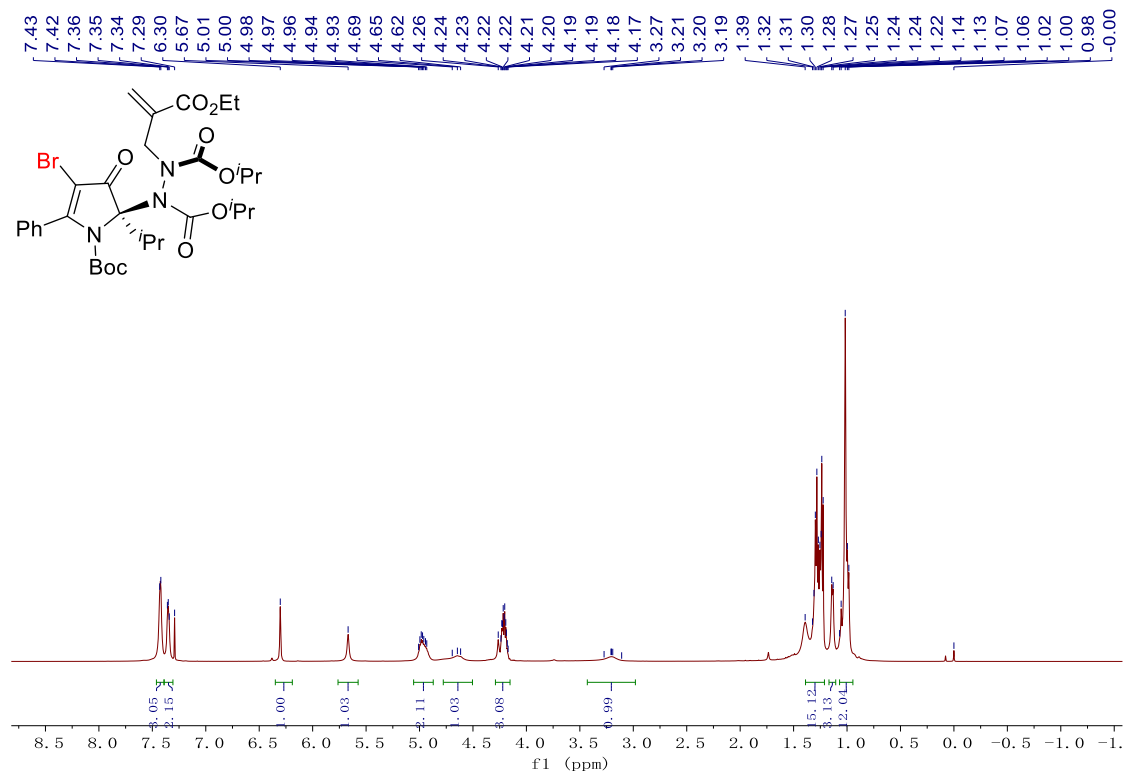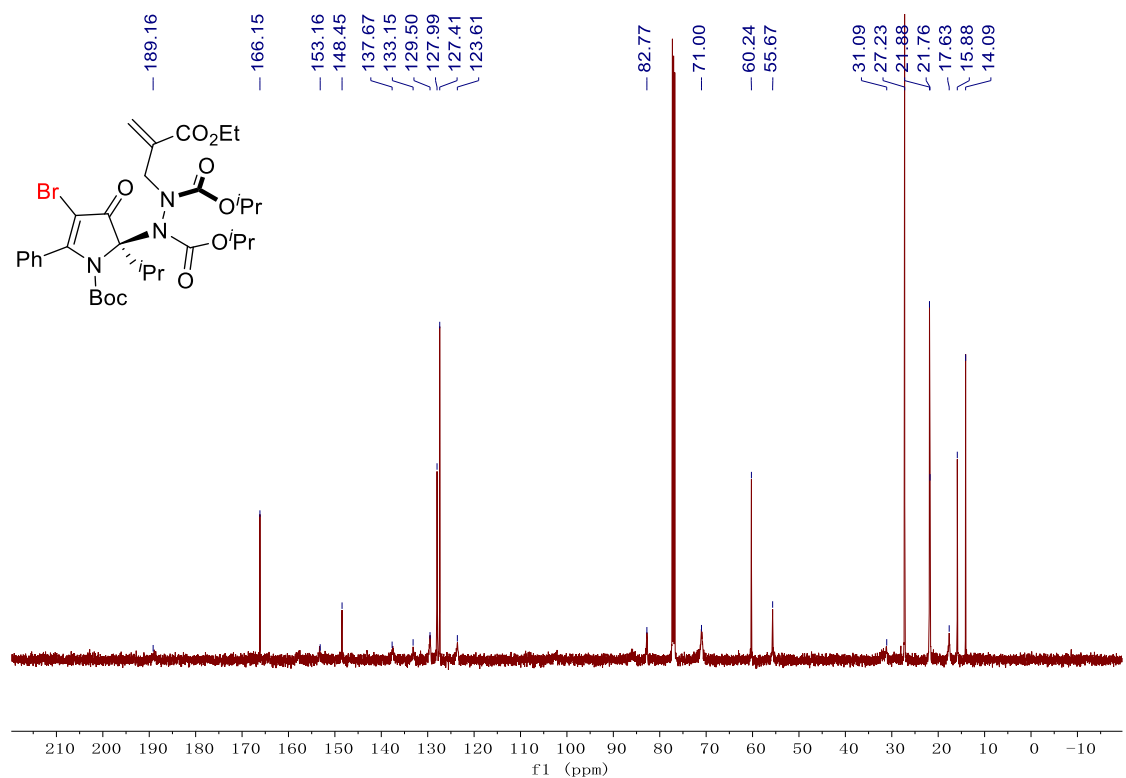

**(R, R)-2-((2-(1-(tert-butoxycarbonyl)-2-isopropyl-3-oxo-5-phenyl-2,3-dihydro-1H-pyrrol-2-yl)-1,2-bis(isopropoxycarbonyl)hydrazineyl)methyl)acrylic acid (15)**

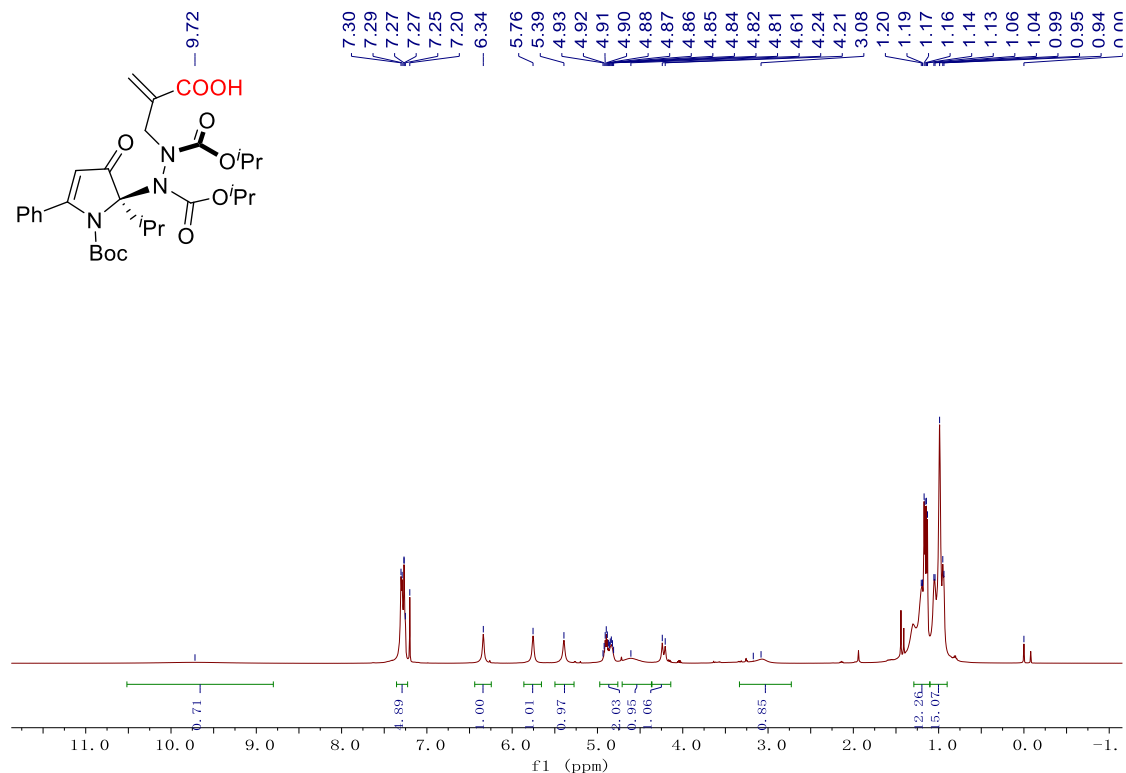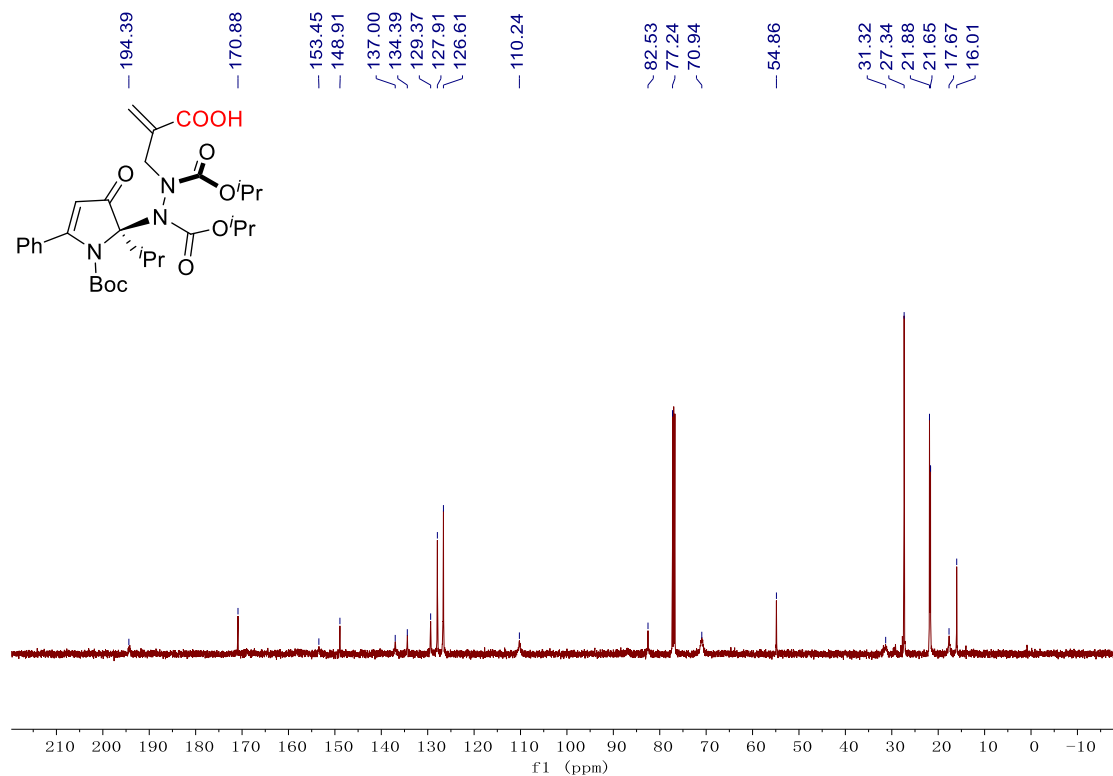



**Dibenzyl (R)-1-(1-(tert-butoxycarbonyl)-2-isopropyl-3-oxo-5-phenyl-2,3-dihydro-1H-pyrrol-2-yl)hydrazine-1,2-dicarboxylate (3a)**

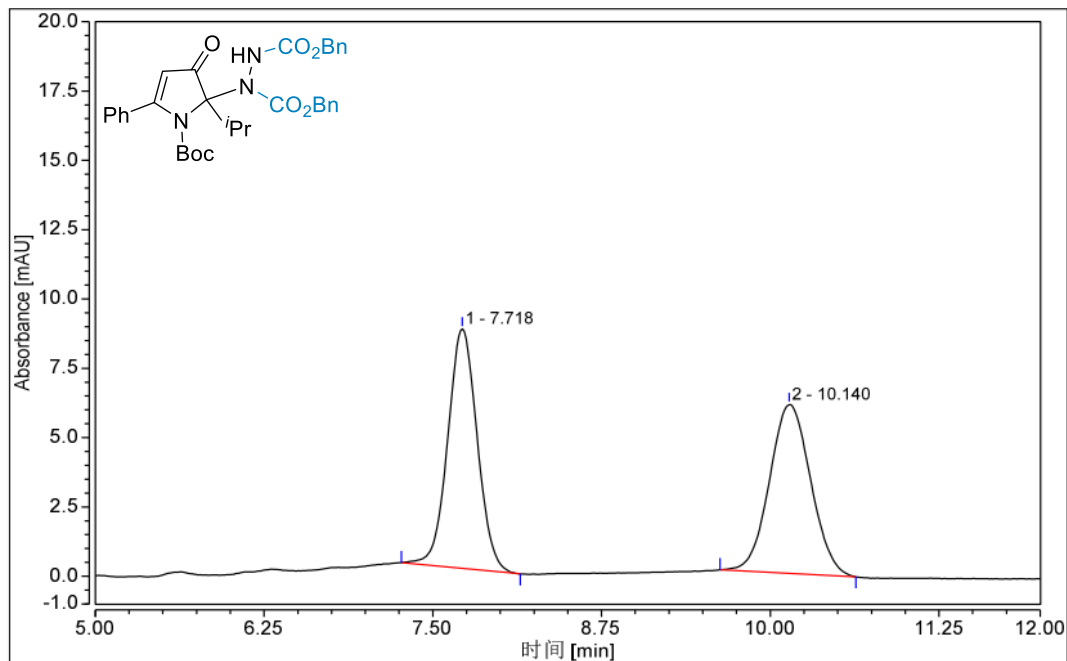

| Peak | RT min | Aera mAU*min | Height mAU | Area % | Height % |
|------|--------|--------------|------------|--------|----------|
| 1    | 7.718  | 2.184        | 8.633      | 50.38  | 58.64    |
| 2    | 10.140 | 2.151        | 6.090      | 49.62  | 41.36    |

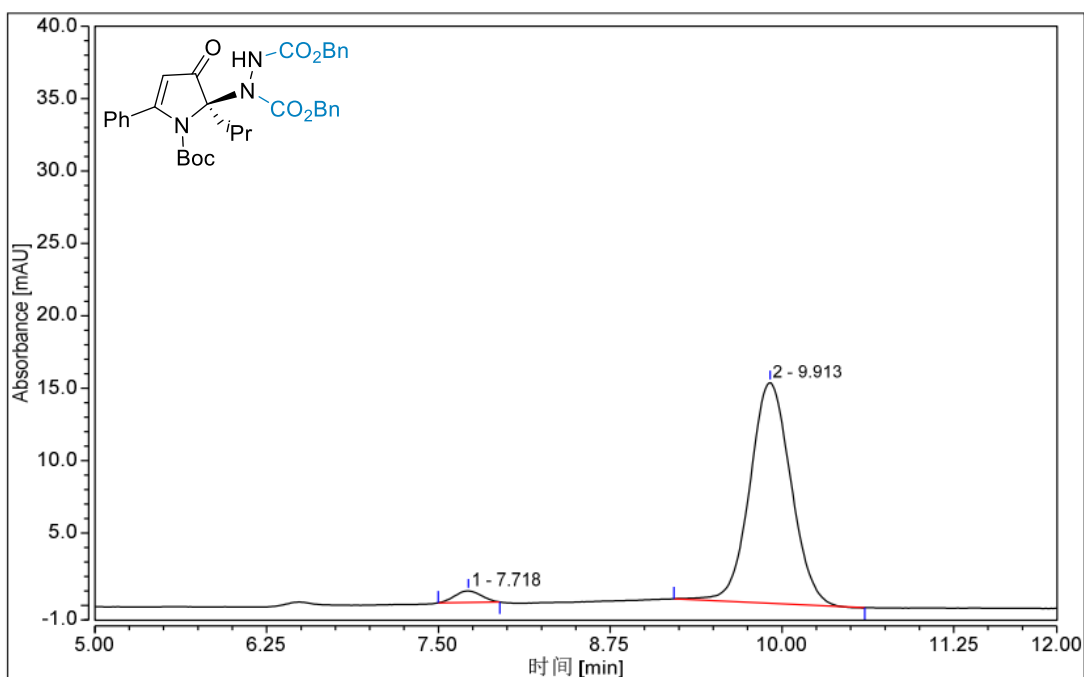

| Peak | RT min | Aera mAU*min | Height mAU | Area % | Height % |
|------|--------|--------------|------------|--------|----------|
| 1    | 7.718  | 0.179        | 0.801      | 3.29   | 4.99     |
| 2    | 9.913  | 5.280        | 15.247     | 96.71  | 95.01    |

diethyl (*R*)-1-(1-(tert-butoxycarbonyl)-2-isopropyl-3-oxo-5-phenyl-2,3-dihydro-1H-pyrrol-2-yl)hydrazine-1,2-dicarboxylate (**3b**)

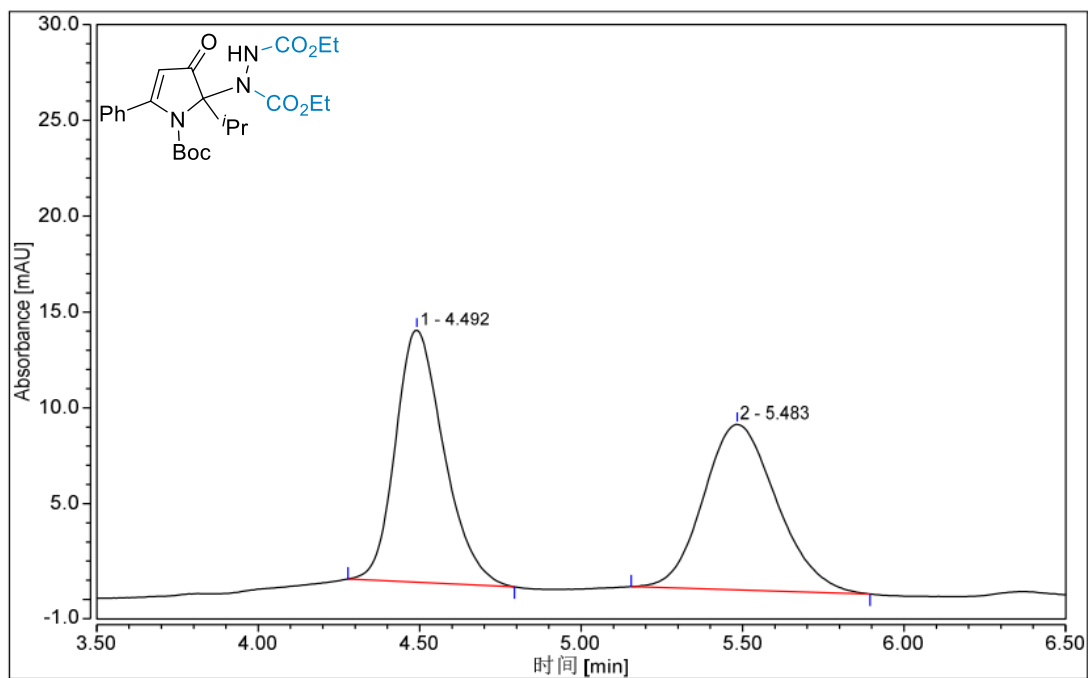

| Peak | RT min | Aera mAU*min | Height mAU | Area % | Height % |
|------|--------|--------------|------------|--------|----------|
| 1    | 4.492  | 2.293        | 13.163     | 50.20  | 60.37    |
| 2    | 5.483  | 2.274        | 8.641      | 49.80  | 39.63    |

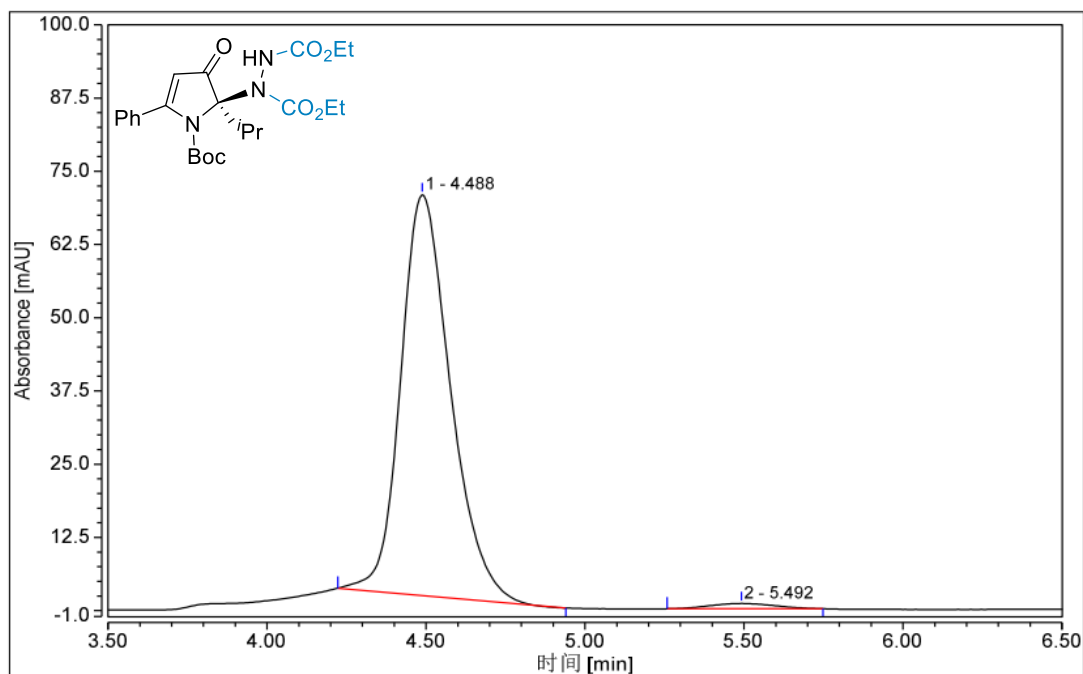

| Peak | RT min | Aera mAU*min | Height mAU | Area % | Height % |
|------|--------|--------------|------------|--------|----------|
| 1    | 4.488  | 12.437       | 68.436     | 98.30  | 98.69    |
| 2    | 5.492  | 0.215        | 0.909      | 1.70   | 1.31     |

**diisopropyl (R)-1-(1-(tert-butoxycarbonyl)-2-isopropyl-3-oxo-5-phenyl-2,3-dihydro-1H-pyrrol-2-yl)hydrazine-1,2-dicarboxylate (3c)**

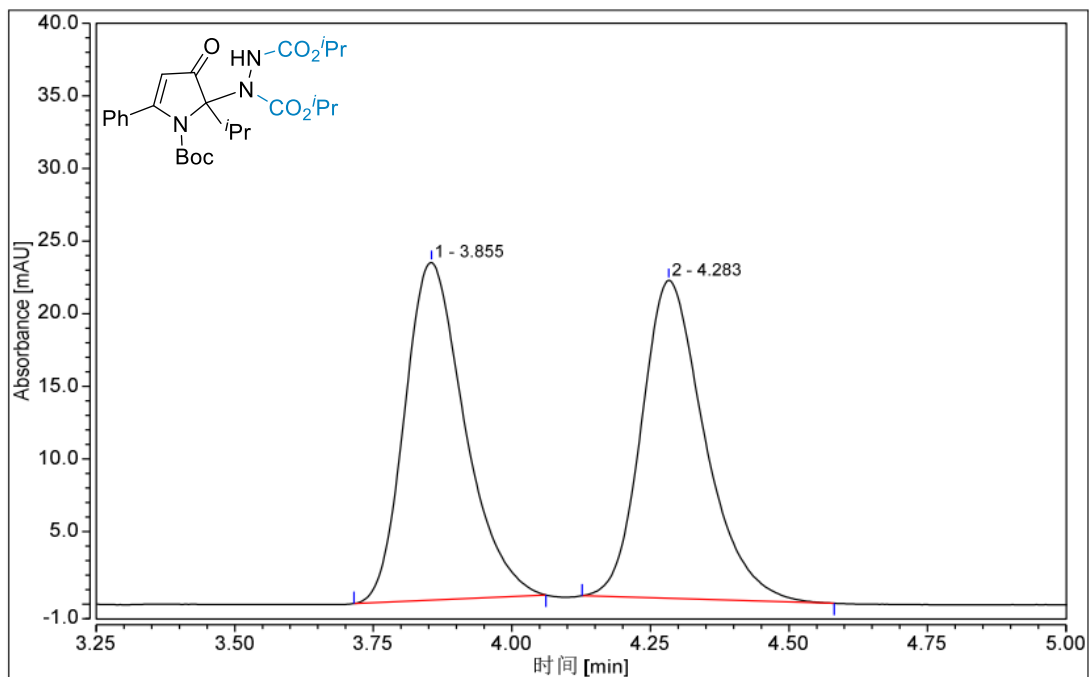

| Peak | RT min | Aera mAU*min | Height mAU | Area % | Height % |
|------|--------|--------------|------------|--------|----------|
| 1    | 3.855  | 2.912        | 23.251     | 50.19  | 51.49    |
| 2    | 4.283  | 2.890        | 21.901     | 49.81  | 48.51    |

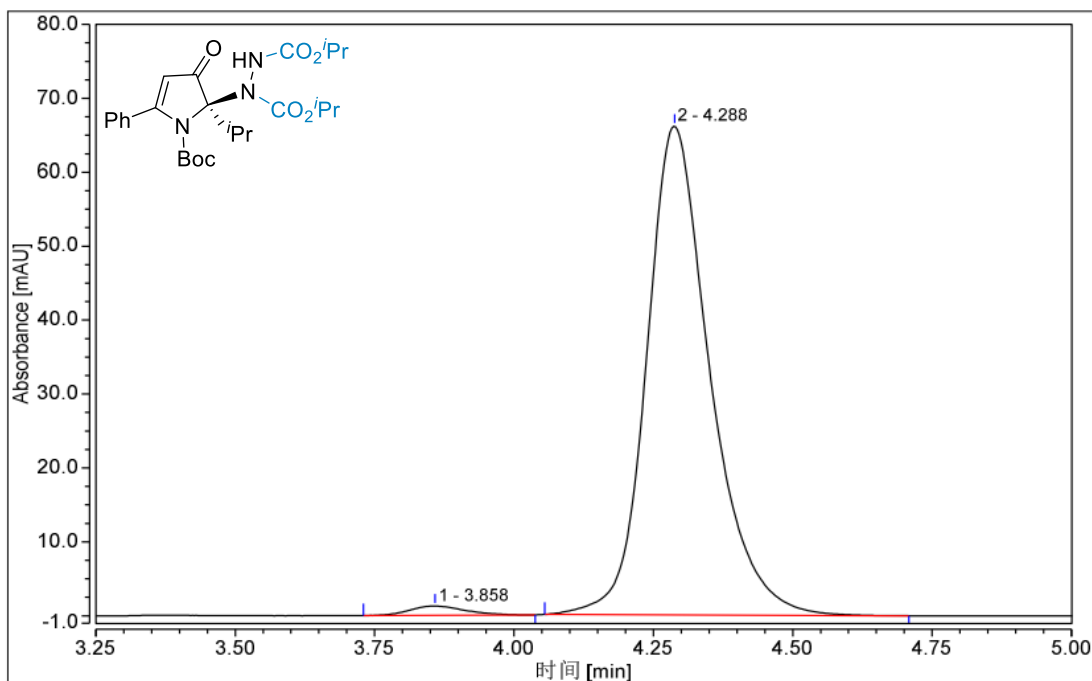

| Peak | RT min | Aera mAU*min | Height mAU | Area % | Height % |
|------|--------|--------------|------------|--------|----------|
| 1    | 3.858  | 0.141        | 1.249      | 1.60   | 1.85     |
| 2    | 4.288  | 8.684        | 66.096     | 98.40  | 98.15    |

diethyl (*R*)-1-(1-(tert-butoxycarbonyl)-2-isopropyl-3-oxo-5-(*p*-tolyl)-2,3-dihydro-1*H*-pyrrol-2-yl)hydrazine-1,2-dicarboxylate (3d)

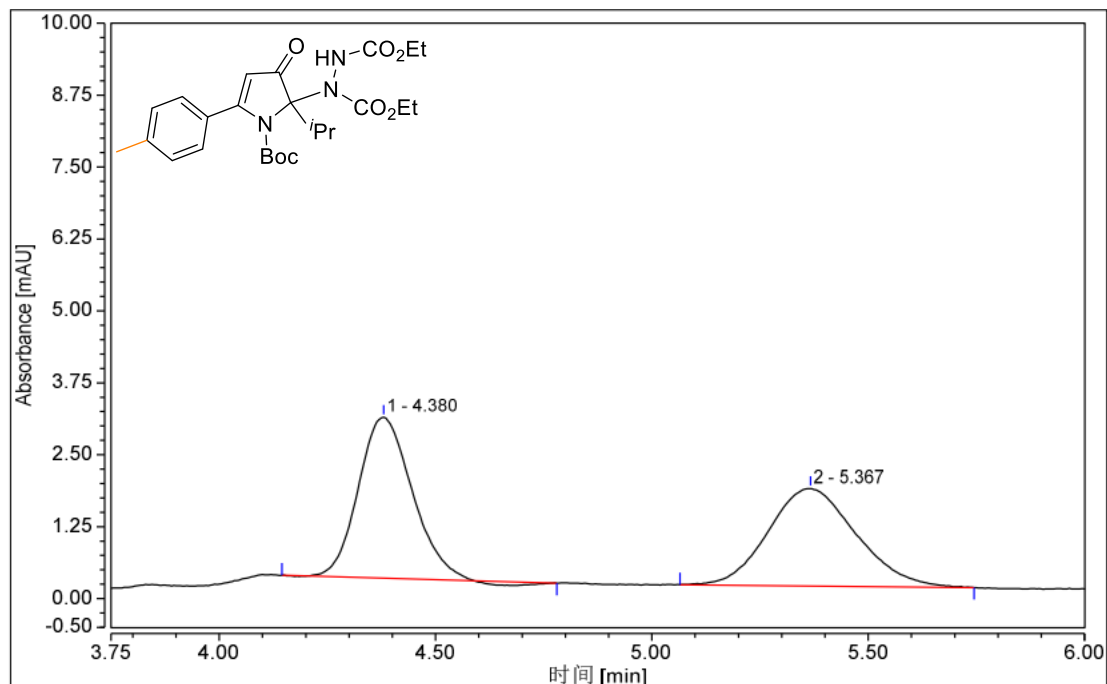

| Peak | RT min | Aera mAU*min | Height mAU | Area % | Height % |
|------|--------|--------------|------------|--------|----------|
| 1    | 4.380  | 0.398        | 2.796      | 49.99  | 62.24    |
| 2    | 5.367  | 0.399        | 1.697      | 50.01  | 37.76    |

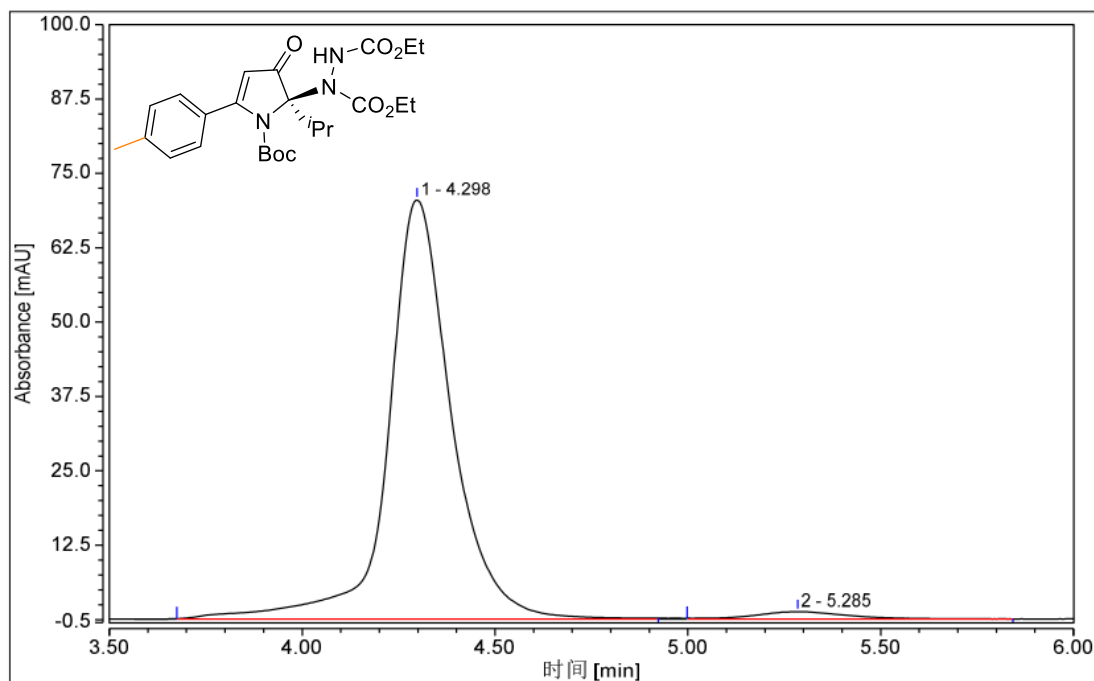

| Peak | RT min | Aera mAU*min | Height mAU | Area % | Height % |
|------|--------|--------------|------------|--------|----------|
| 1    | 4.298  | 13.451       | 70.466     | 97.54  | 98.28    |
| 2    | 5.285  | 0.340        | 1.235      | 2.46   | 1.72     |

diethyl (*R*)-1-(1-(tert-butoxycarbonyl)-2-isopropyl-5-(4-methoxyphenyl)-3-oxo-2,3-dihydro-1H-pyrrol-2-yl)hydrazine-1,2-dicarboxylate (**3e**)

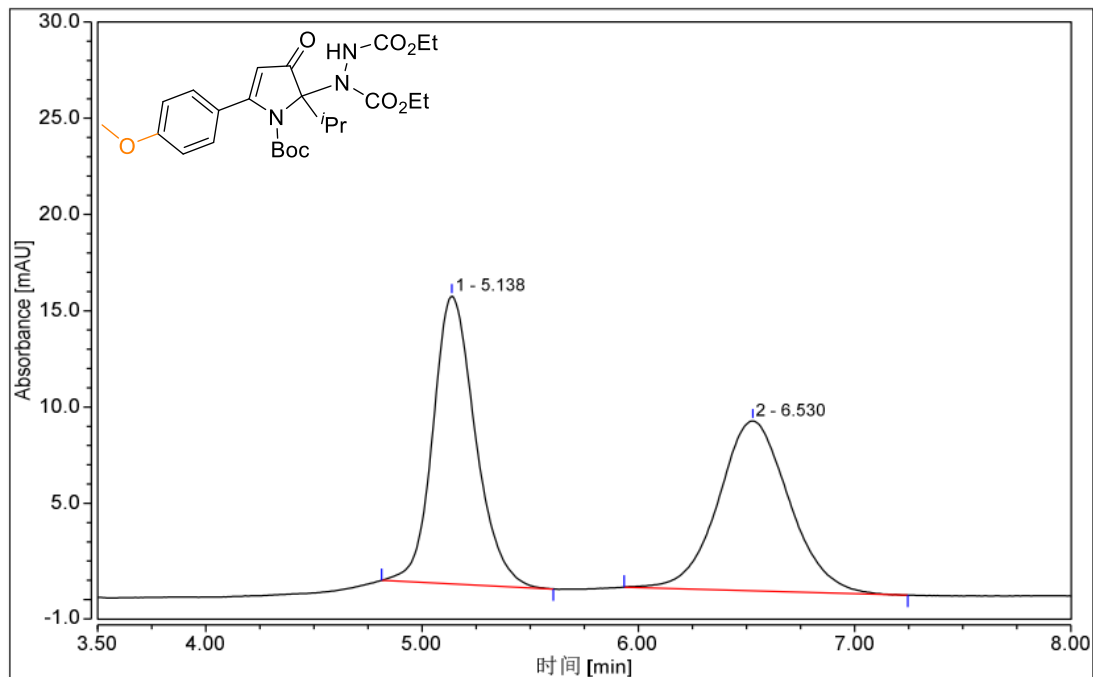

| Peak | RT min | Aera mAU*min | Height mAU | Area % | Height % |
|------|--------|--------------|------------|--------|----------|
| 1    | 5.138  | 3.395        | 14.950     | 50.35  | 62.87    |
| 2    | 6.530  | 3.348        | 8.830      | 49.65  | 37.13    |

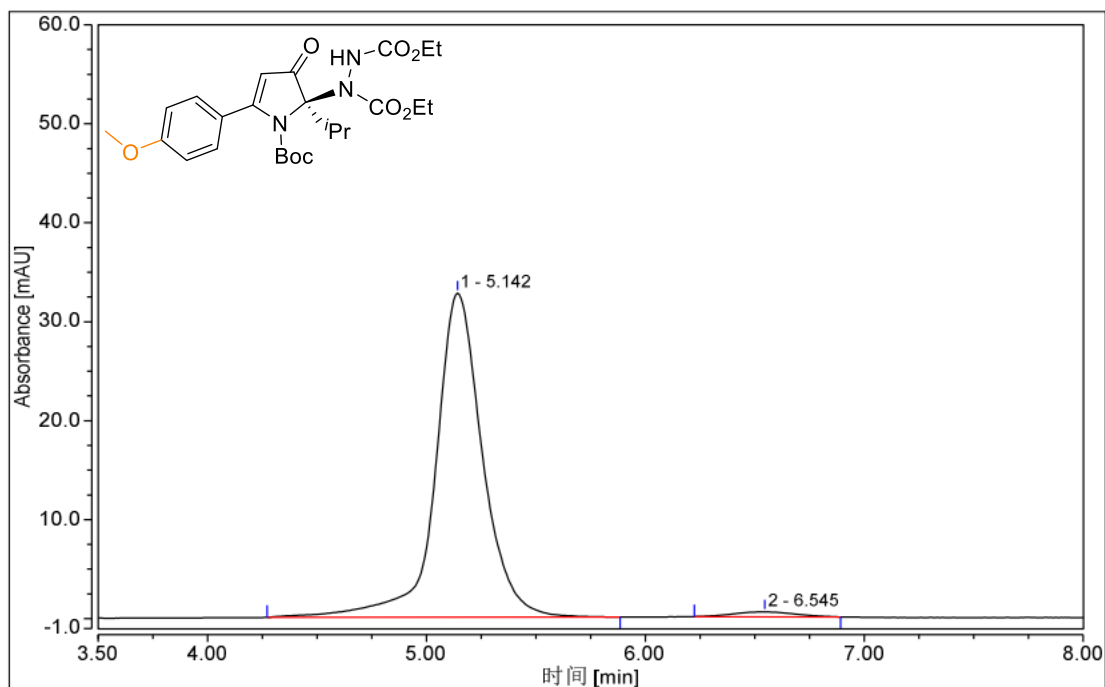

| Peak | RT min | Aera mAU*min | Height mAU | Area % | Height % |
|------|--------|--------------|------------|--------|----------|
| 1    | 5.142  | 8.194        | 32.752     | 98.06  | 98.52    |
| 2    | 6.545  | 0.162        | 0.492      | 1.94   | 1.48     |

**diethyl (R)-1-(1-(tert-butoxycarbonyl)-5-(4-fluorophenyl)-2-isopropyl-3-oxo-2,3-dihydro-1H-pyrrol-2-yl)hydrazine-1,2-dicarboxylate (3f)**

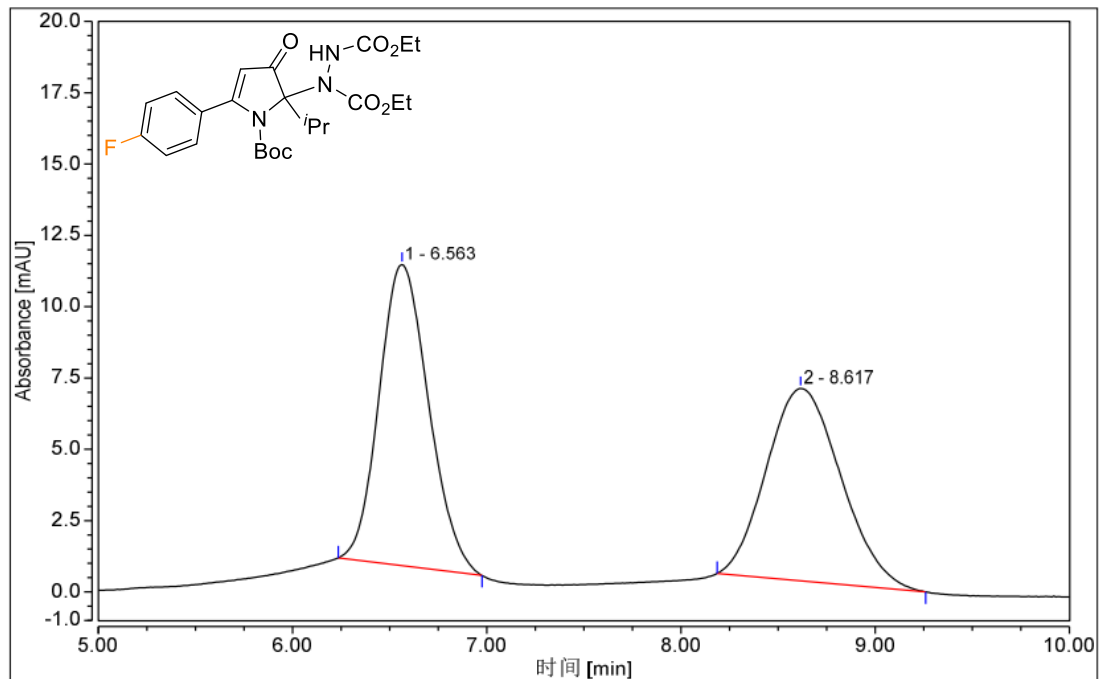

| Peak | RT min | Aera mAU*min | Height mAU | Area % | Height % |
|------|--------|--------------|------------|--------|----------|
| 1    | 6.563  | 3.114        | 10.558     | 50.90  | 61.02    |
| 2    | 8.617  | 3.004        | 6.745      | 49.10  | 38.98    |

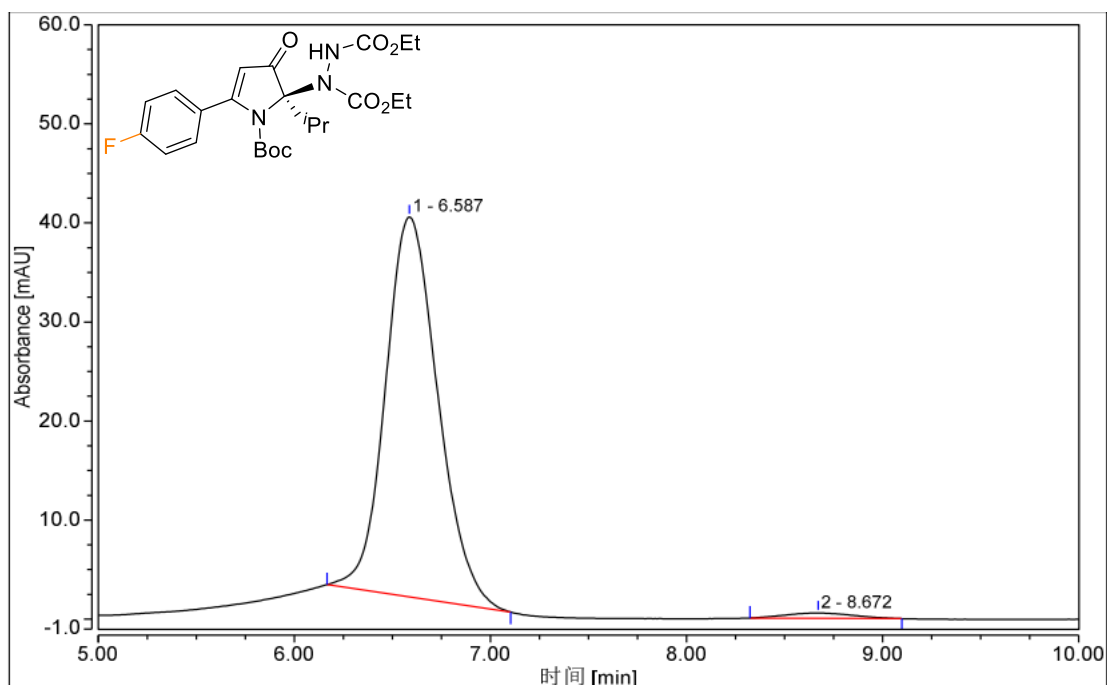

| Peak | RT min | Aera mAU*min | Height mAU | Area % | Height % |
|------|--------|--------------|------------|--------|----------|
| 1    | 6.587  | 11.907       | 38.374     | 98.26  | 98.64    |
| 2    | 8.672  | 0.211        | 0.531      | 1.74   | 1.36     |

**diethyl (*R*)-1-(1-(tert-butoxycarbonyl)-2-isopropyl-3-oxo-5-(*m*-tolyl)-2,3-dihydro-1H-pyrrol-2-yl)hydrazine-1,2-dicarboxylate (3g)**

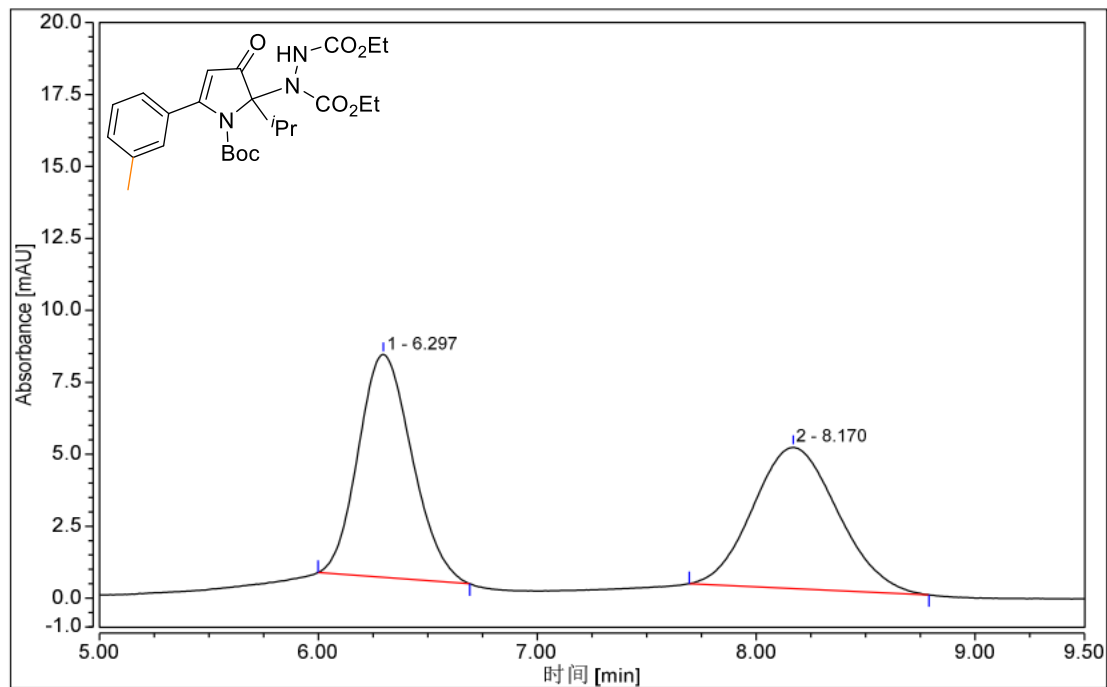

| Peak | RT min | Aera mAU*min | Height mAU | Area % | Height % |
|------|--------|--------------|------------|--------|----------|
| 1    | 6.297  | 2.204        | 7.745      | 50.04  | 61.23    |
| 2    | 8.170  | 2.201        | 4.904      | 49.96  | 38.77    |

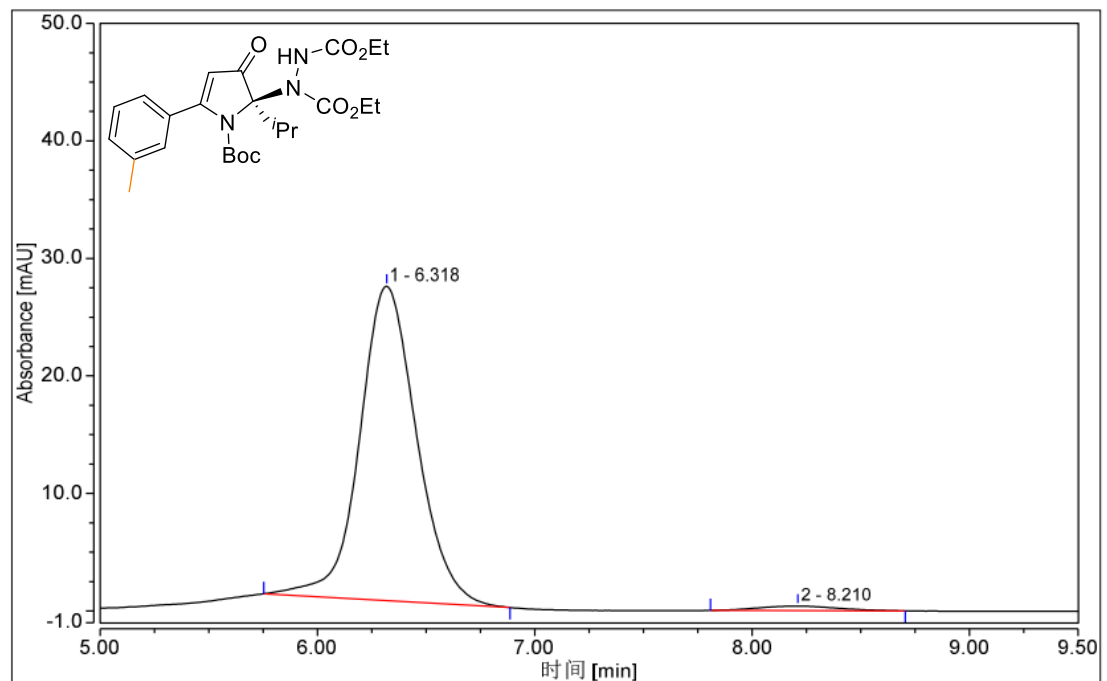

| Peak | RT min | Aera mAU*min | Height mAU | Area % | Height % |
|------|--------|--------------|------------|--------|----------|
| 1    | 6.318  | 8.145        | 26.761     | 98.05  | 98.55    |
| 2    | 8.210  | 0.162        | 0.392      | 1.95   | 1.45     |

**diethyl (R)-1-(1-(tert-butoxycarbonyl)-5-(3-chlorophenyl)-2-isopropyl-3-oxo-2,3-dihydro-1H-pyrrol-2-yl)hydrazine-1,2-dicarboxylate (3h)**

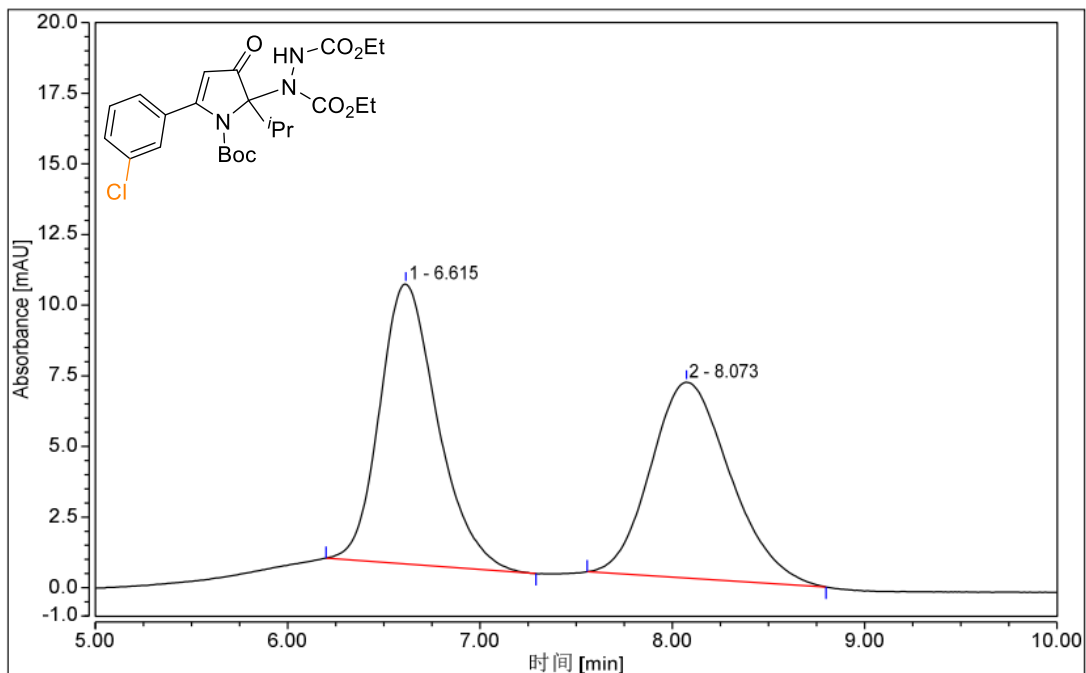

| Peak | RT min | Aera mAU*min | Height mAU | Area % | Height % |
|------|--------|--------------|------------|--------|----------|
| 1    | 6.615  | 3.457        | 9.912      | 50.99  | 58.83    |
| 2    | 8.073  | 3.323        | 6.937      | 49.01  | 41.17    |

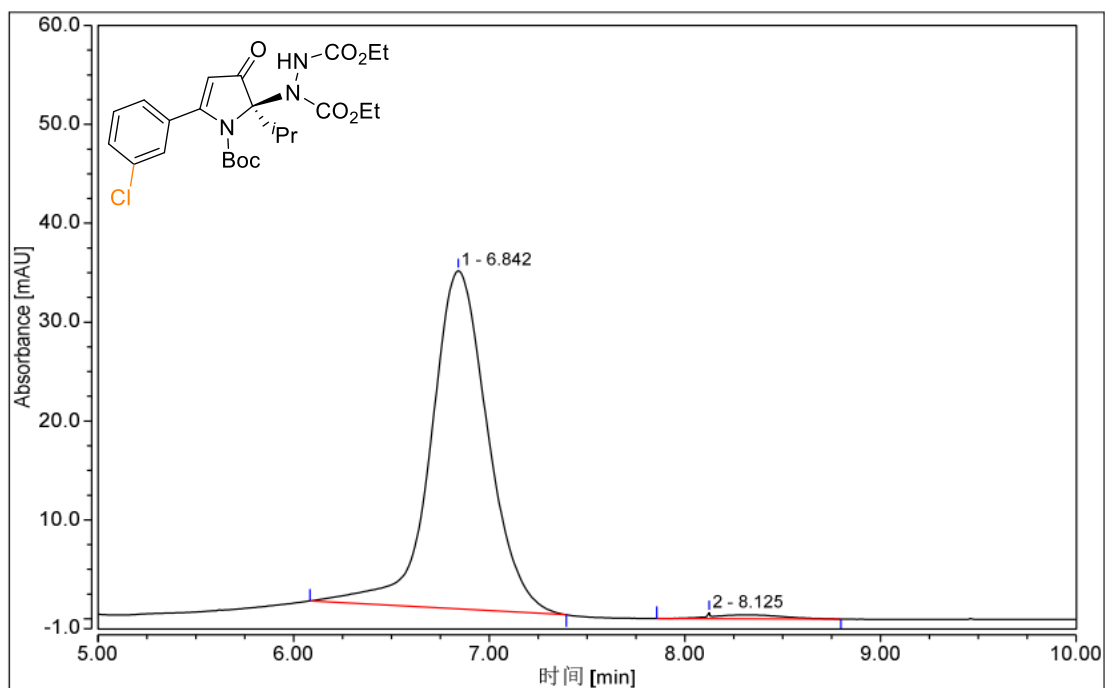

| Peak | RT min | Aera mAU*min | Height mAU | Area % | Height % |
|------|--------|--------------|------------|--------|----------|
| 1    | 6.842  | 11.553       | 34.202     | 98.60  | 98.29    |
| 2    | 8.125  | 0.164        | 0.593      | 1.40   | 1.71     |



**diethyl (R)-1-(1-(tert-butoxycarbonyl)-2-isopropyl-3-oxo-5-(o-tolyl)-2,3-dihydro-1H-pyrrol-2-yl)hydrazine-1,2-dicarboxylate (3i)**

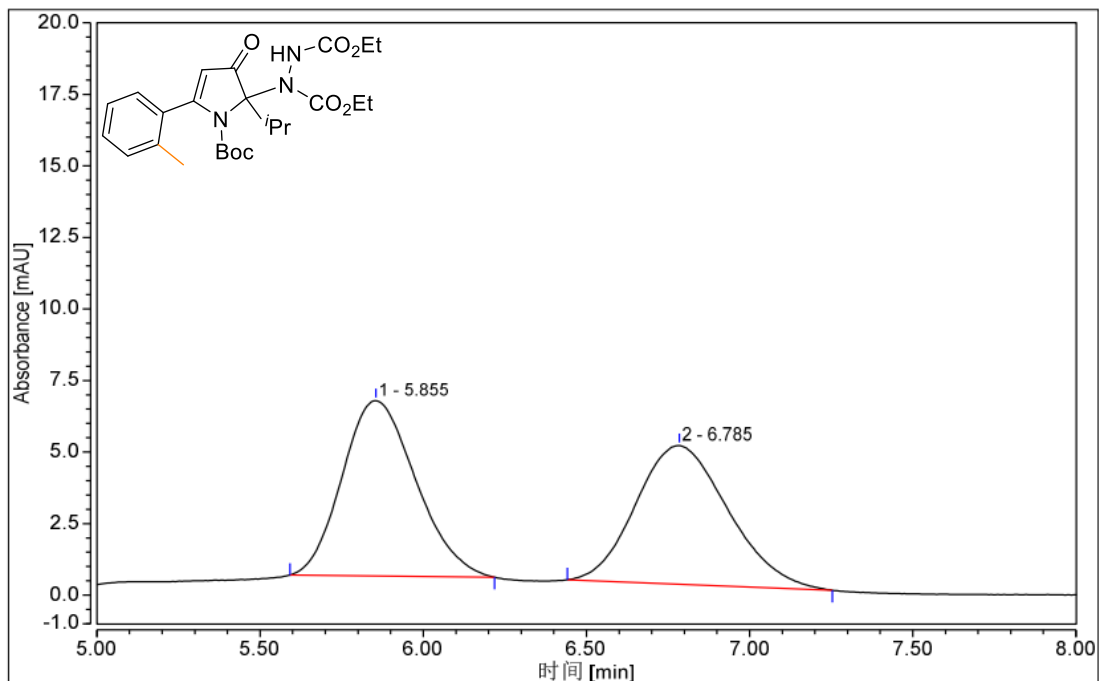

| Peak | RT min | Aera mAU*min | Height mAU | Area % | Height % |
|------|--------|--------------|------------|--------|----------|
| 1    | 5.855  | 1.602        | 6.130      | 50.25  | 55.86    |
| 2    | 6.785  | 1.587        | 4.844      | 49.75  | 44.14    |

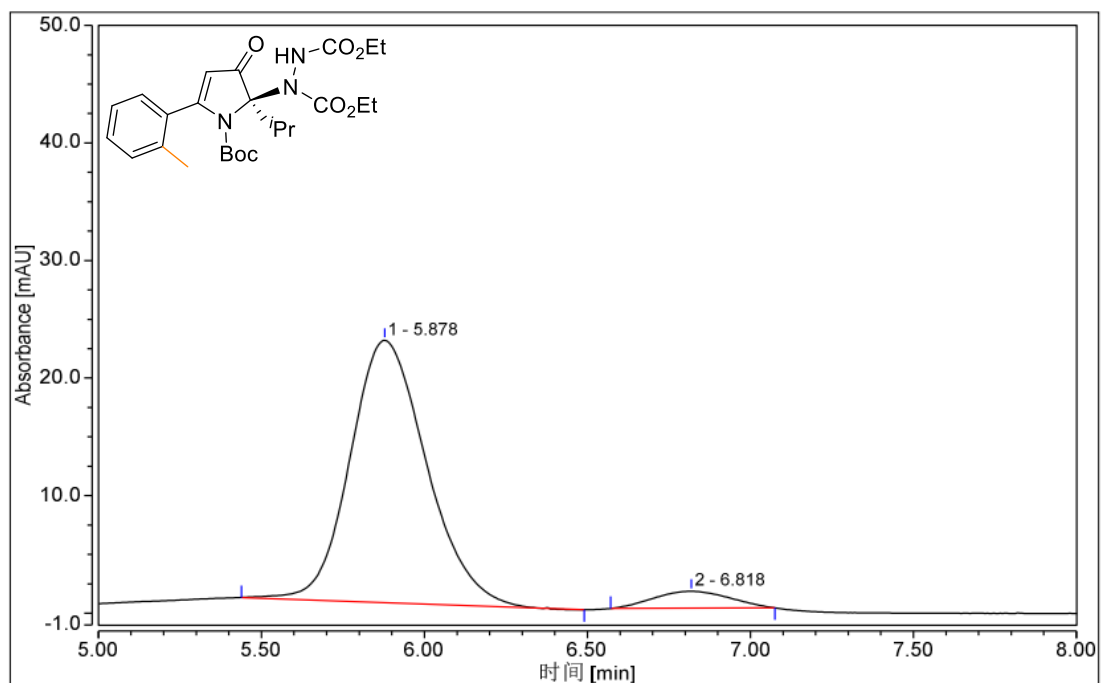

| Peak | RT min | Aera mAU*min | Height mAU | Area % | Height % |
|------|--------|--------------|------------|--------|----------|
| 1    | 5.878  | 6.069        | 22.307     | 94.00  | 93.94    |
| 2    | 6.818  | 0.387        | 1.440      | 6.00   | 6.06     |

diethyl (*R*)-1-(1-(tert-butoxycarbonyl)-2-methyl-3-oxo-5-phenyl-2,3-dihydro-1H-pyrrol-2-yl)hydrazine-1,2-dicarboxylate (**3j**)

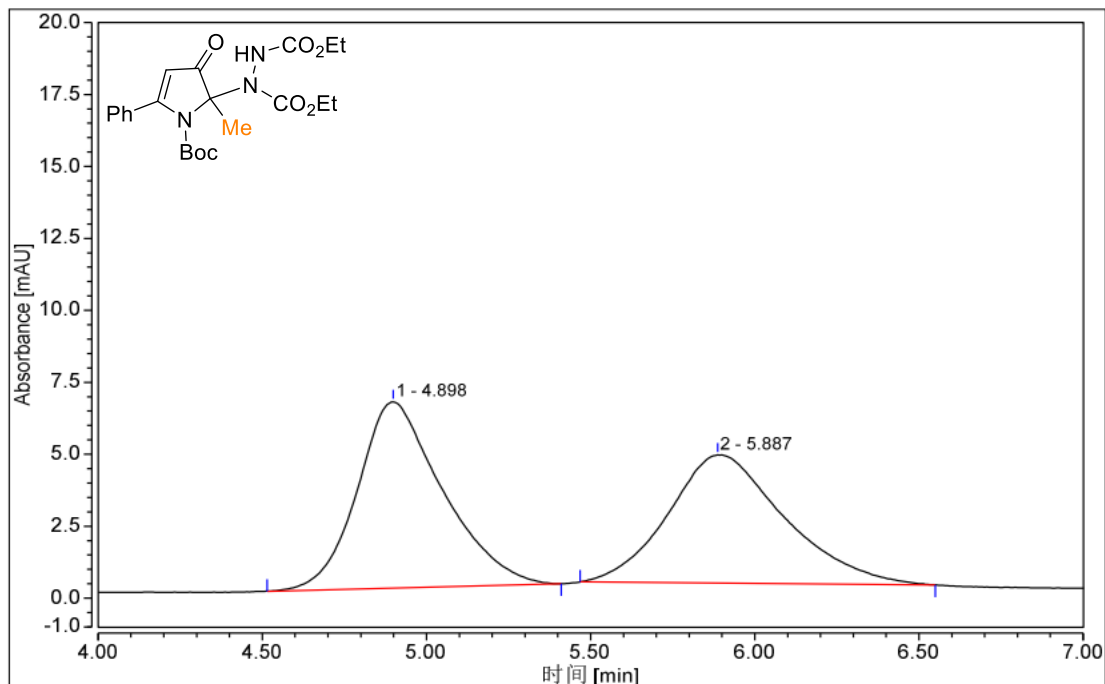

| Peak | RT min | Aera mAU*min | Height mAU | Area % | Height % |
|------|--------|--------------|------------|--------|----------|
| 1    | 4.898  | 1.948        | 6.470      | 51.61  | 59.24    |
| 2    | 5.887  | 1.826        | 4.451      | 48.39  | 40.76    |

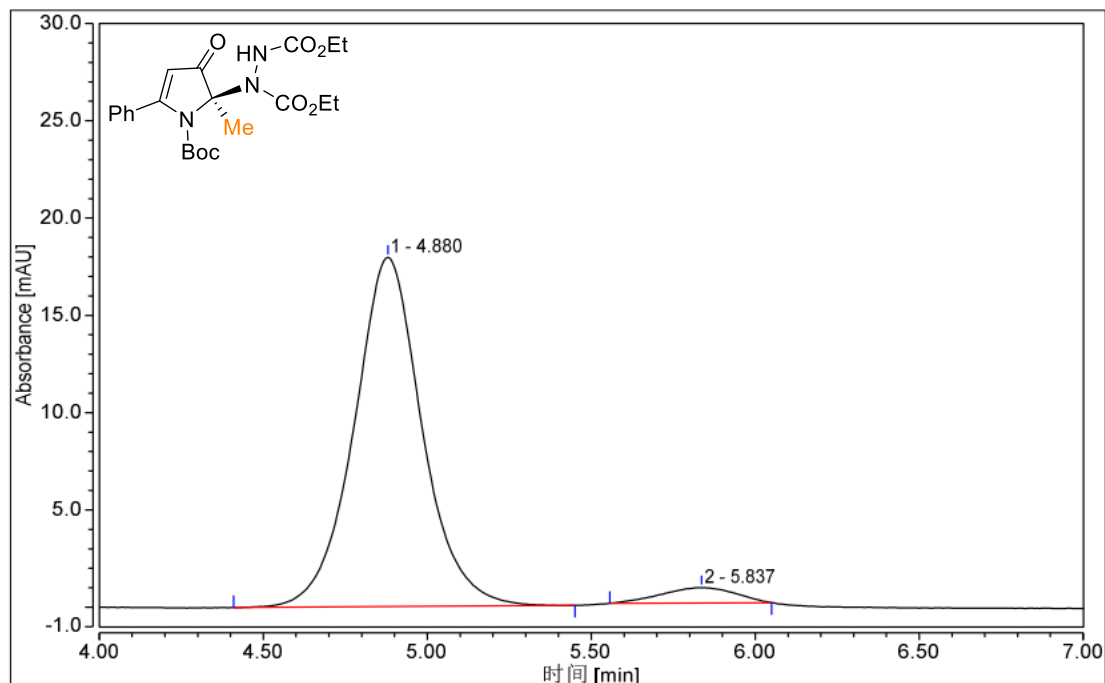

| Peak | RT min | Aera mAU*min | Height mAU | Area % | Height % |
|------|--------|--------------|------------|--------|----------|
| 1    | 4.880  | 4.308        | 17.946     | 95.48  | 95.78    |
| 2    | 5.837  | 0.204        | 0.791      | 4.52   | 4.22     |

**diisopropyl (*R*)-1-(1-(tert-butoxycarbonyl)-2-methyl-3-oxo-5-phenyl-2,3-dihydro-1H-pyrrol-2-yl)hydrazine-1,2-dicarboxylate (3k)**

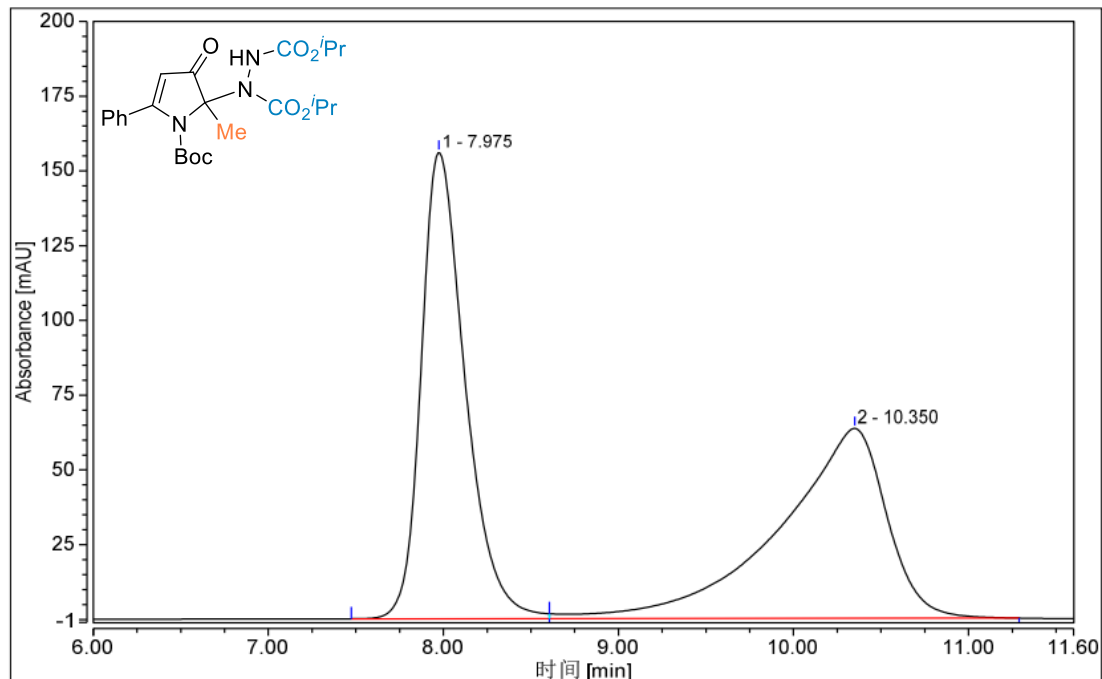

| Peak | RT min | Aera mAU*min | Height mAU | Area % | Height % |
|------|--------|--------------|------------|--------|----------|
| 1    | 7.975  | 45.426       | 155.950    | 50.07  | 71.06    |
| 2    | 10.350 | 45.304       | 63.498     | 49.93  | 28.94    |

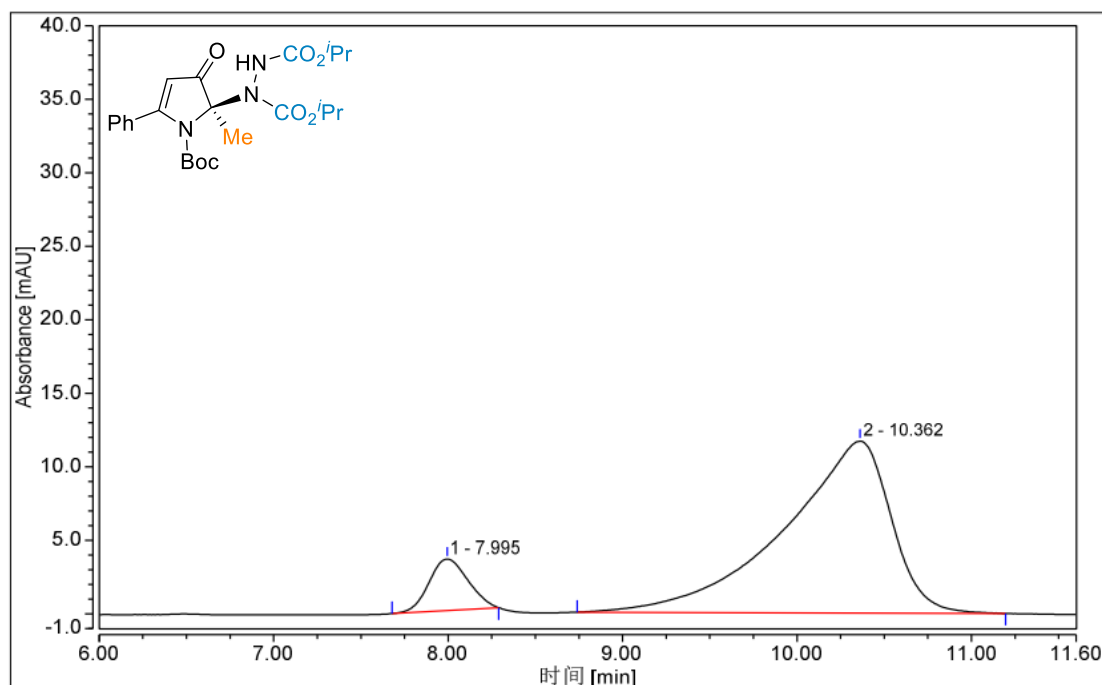

| Peak | RT min | Aera mAU*min | Height mAU | Area % | Height % |
|------|--------|--------------|------------|--------|----------|
| 1    | 7.995  | 0.906        | 3.508      | 9.87   | 23.08    |
| 2    | 10.362 | 8.268        | 11.688     | 90.13  | 76.92    |

diethyl (R)-1-(2-benzyl-1-(tert-butoxycarbonyl)-3-oxo-5-phenyl-2,3-dihydro-1H-pyrrol-2-yl)hydrazine-1,2-dicarboxylate (3I)

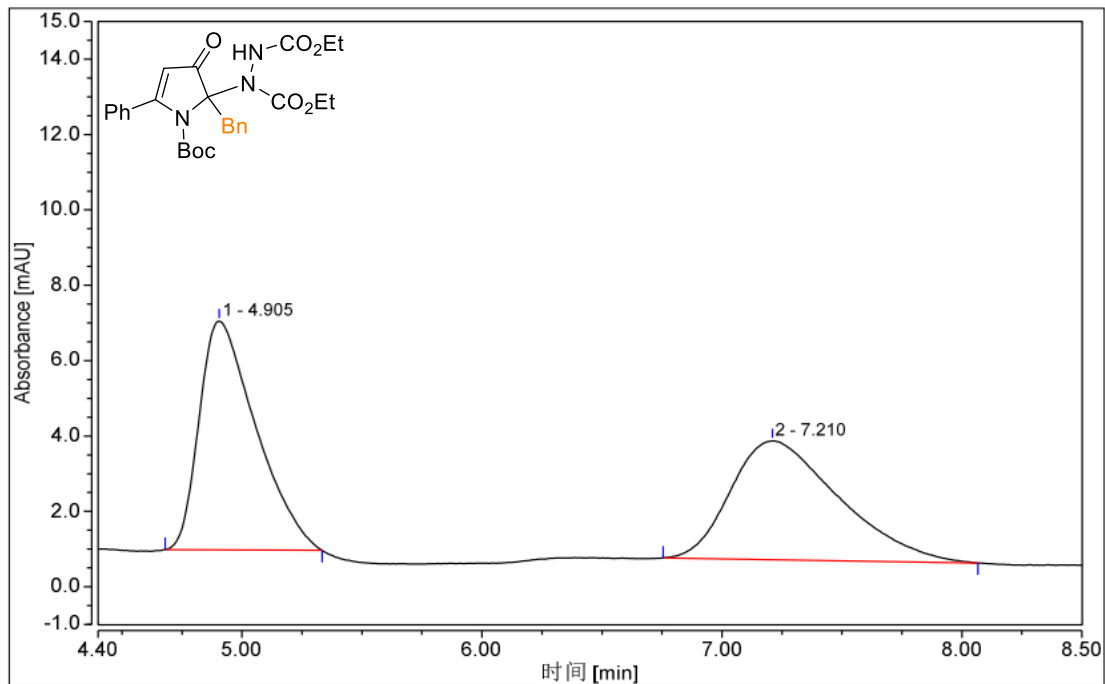

| Peak | RT min | Aera mAU*min | Height mAU | Area % | Height % |
|------|--------|--------------|------------|--------|----------|
| 1    | 4.905  | 1.666        | 6.073      | 50.25  | 65.81    |
| 2    | 7.210  | 1.650        | 3.155      | 49.75  | 34.19    |

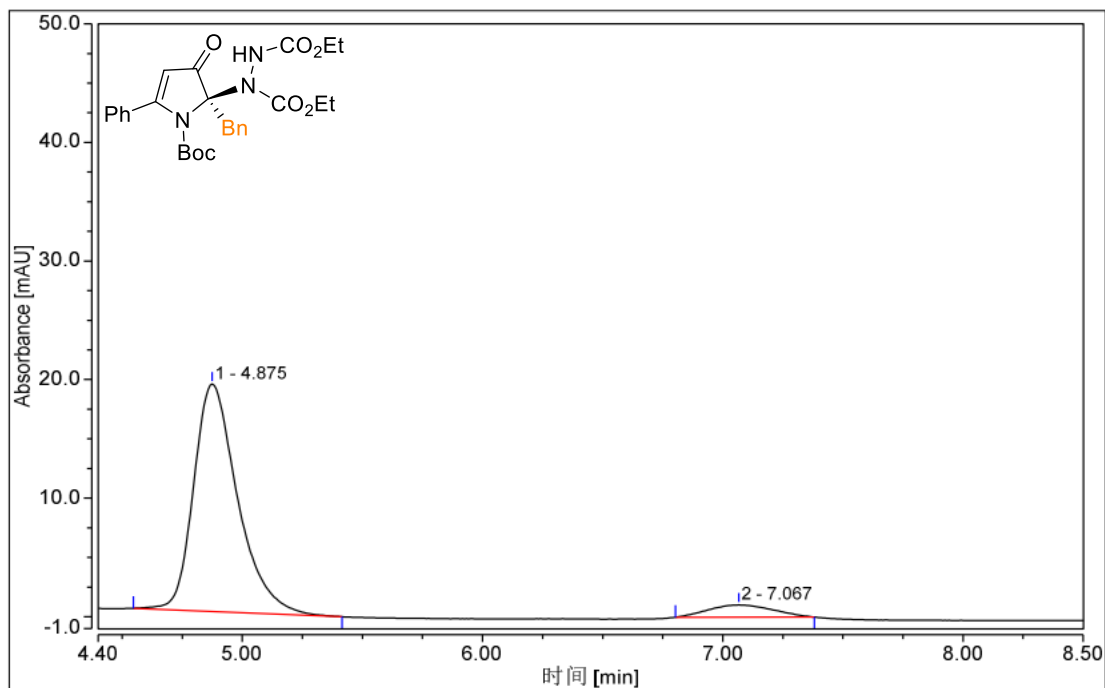

| Peak | RT min | Aera mAU*min | Height mAU | Area % | Height % |
|------|--------|--------------|------------|--------|----------|
| 1    | 4.875  | 4.077        | 19.186     | 92.73  | 94.92    |
| 2    | 7.067  | 0.319        | 1.027      | 7.27   | 5.08     |

diisopropyl (*R*)-1-(1-(tert-butoxycarbonyl)-3-oxo-2,5-diphenyl-2,3-dihydro-1H-pyrrol-2-yl)hydrazine-1,2-dicarboxylate (3m)

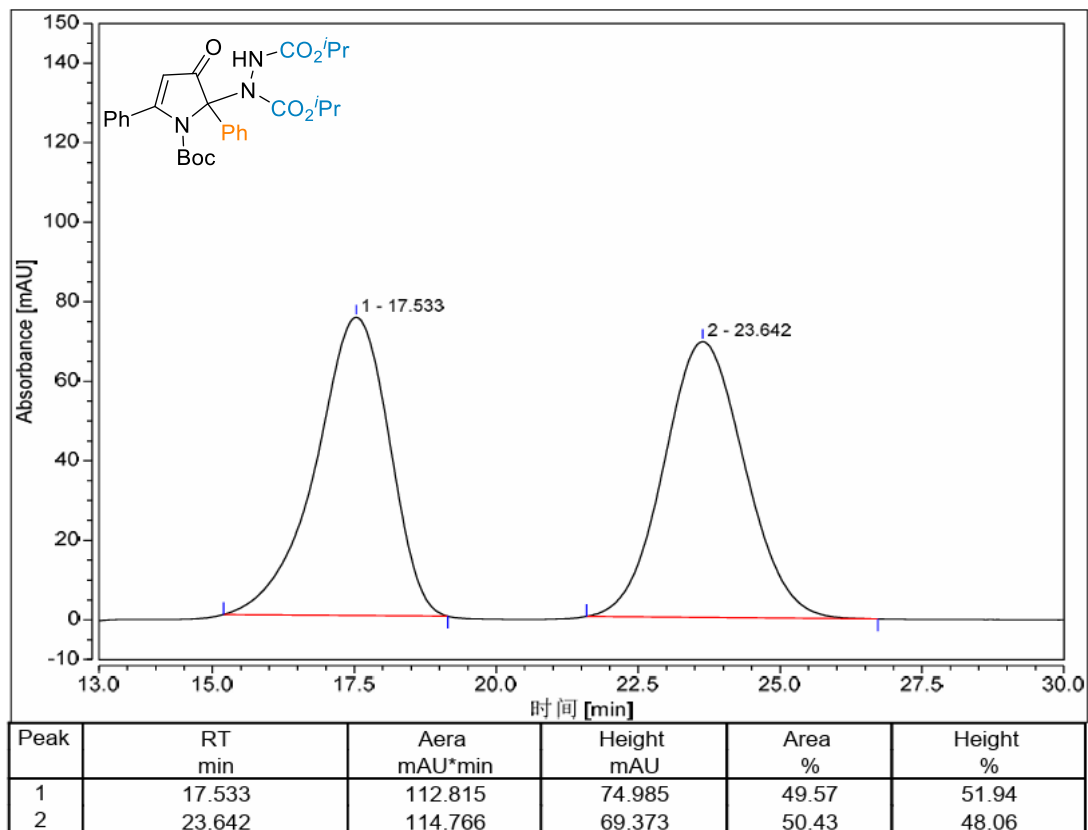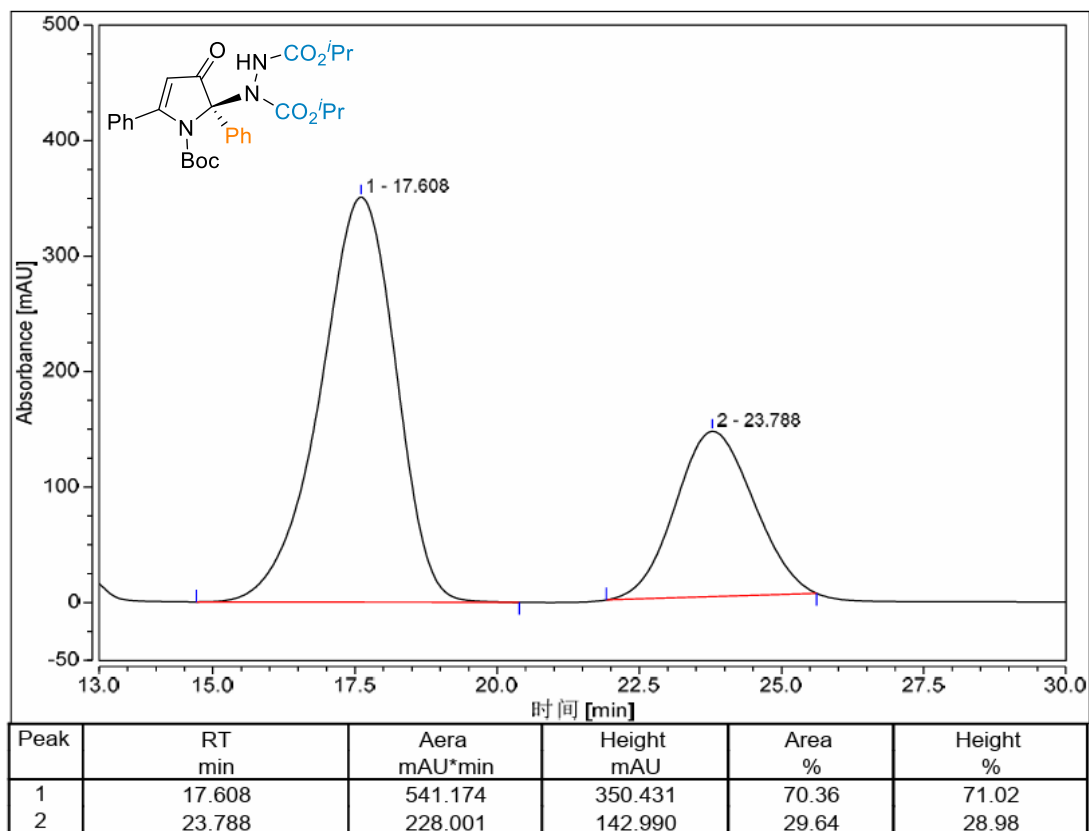

diethyl (*R*)-1-(1-(tert-butoxycarbonyl)-5-(4-ethylphenyl)-2-isopropyl-3-oxo-2,3-dihydro-1H-pyrrol-2-yl)hydrazine-1,2-dicarboxylate (S3o)

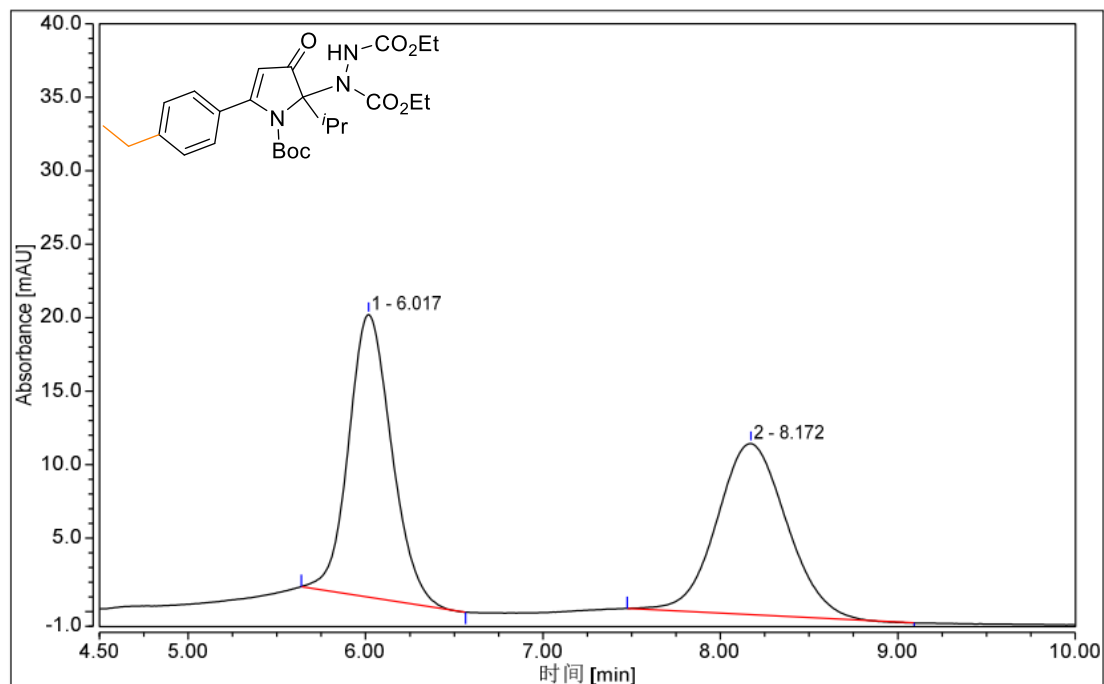

| Peak | RT min | Aera mAU*min | Height mAU | Area % | Height % |
|------|--------|--------------|------------|--------|----------|
| 1    | 6.017  | 5.392        | 19.227     | 50.38  | 62.27    |
| 2    | 8.172  | 5.311        | 11.652     | 49.62  | 37.73    |

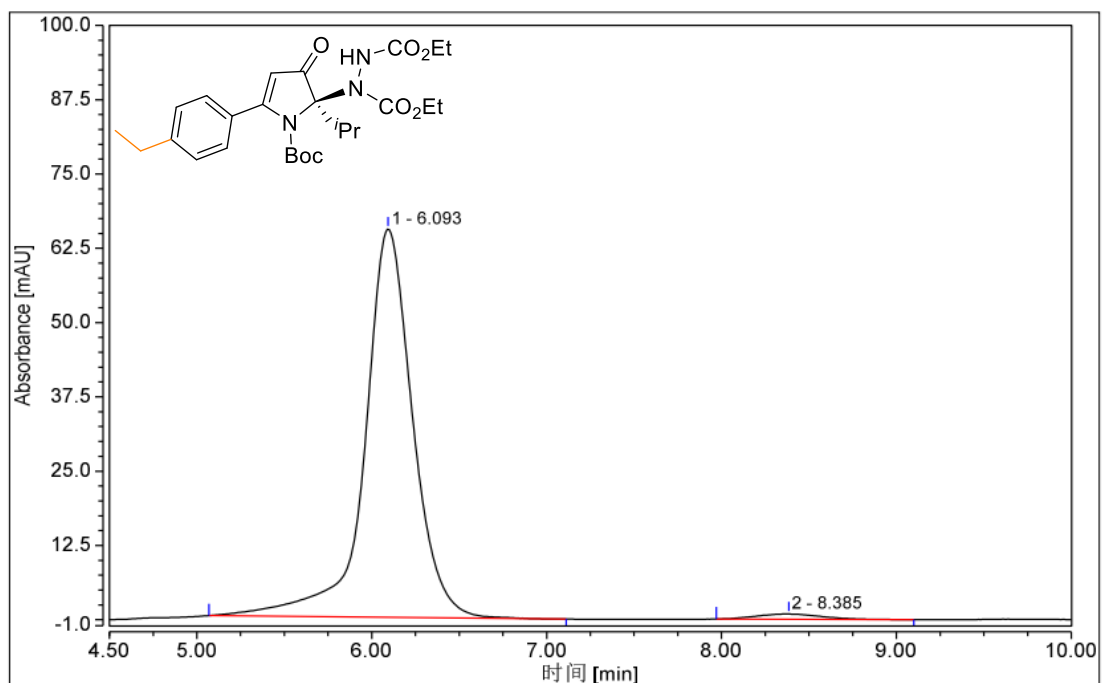

| Peak | RT min | Aera mAU*min | Height mAU | Area % | Height % |
|------|--------|--------------|------------|--------|----------|
| 1    | 6.093  | 20.871       | 65.336     | 98.24  | 98.66    |
| 2    | 8.385  | 0.375        | 0.887      | 1.76   | 1.34     |

diethyl (*R*)-1-(1-(tert-butoxycarbonyl)-5-(4-butylphenyl)-2-isopropyl-3-oxo-2,3-dihydro-1H-pyrrol-2-yl)hydrazine-1,2-dicarboxylate (S3p)

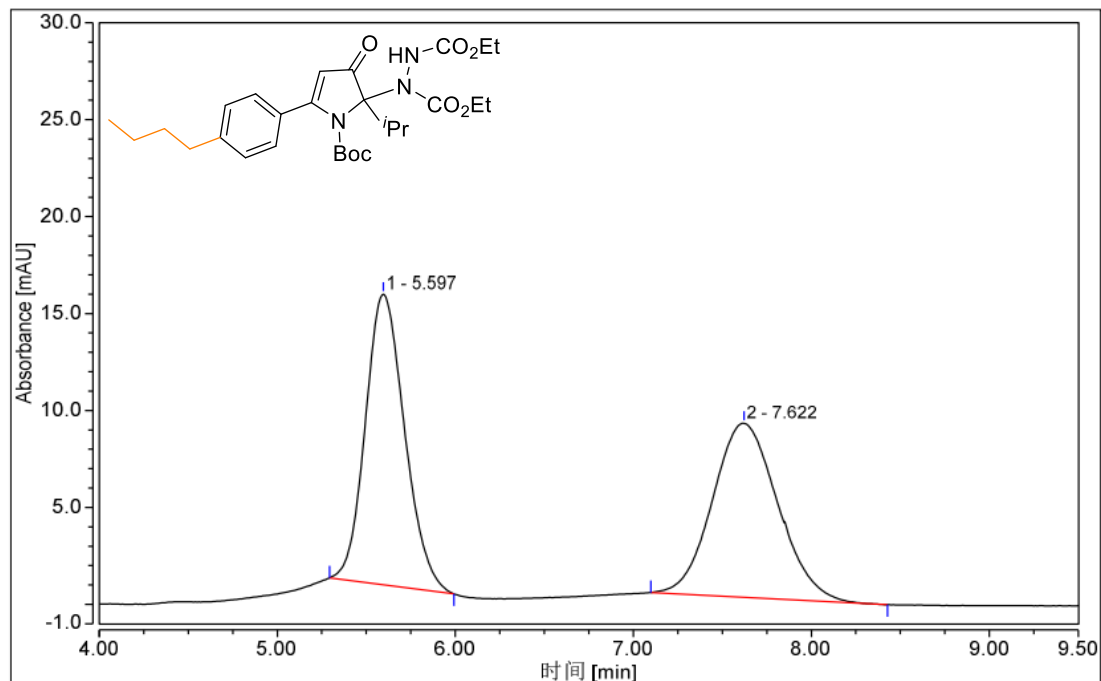

| Peak | RT min | Aera mAU*min | Height mAU | Area % | Height % |
|------|--------|--------------|------------|--------|----------|
| 1    | 5.597  | 3.837        | 14.999     | 50.19  | 62.57    |
| 2    | 7.622  | 3.809        | 8.975      | 49.81  | 37.43    |

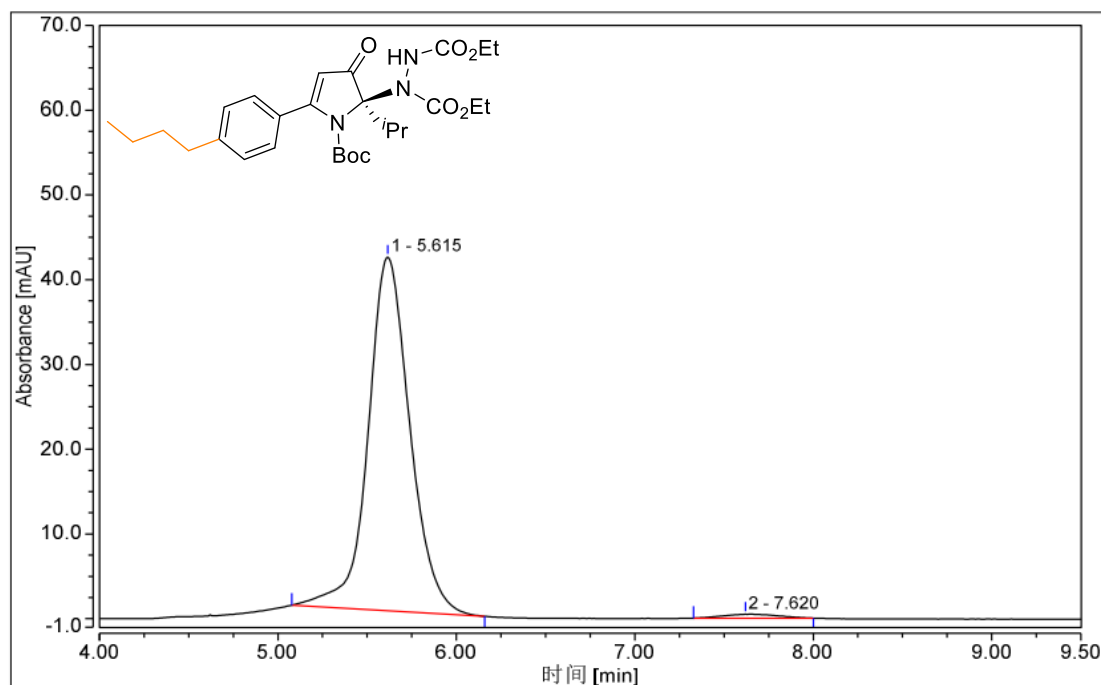

| Peak | RT min | Aera mAU*min | Height mAU | Area % | Height % |
|------|--------|--------------|------------|--------|----------|
| 1    | 5.615  | 11.352       | 41.726     | 98.58  | 98.88    |
| 2    | 7.620  | 0.163        | 0.471      | 1.42   | 1.12     |

diethyl (*R*)-1-(1-(tert-butoxycarbonyl)-5-(4-(tert-butyl)phenyl)-2-isopropyl-3-oxo-2,3-dihydro-1H-pyrrol-2-yl)hydrazine-1,2-dicarboxylate (S3q)

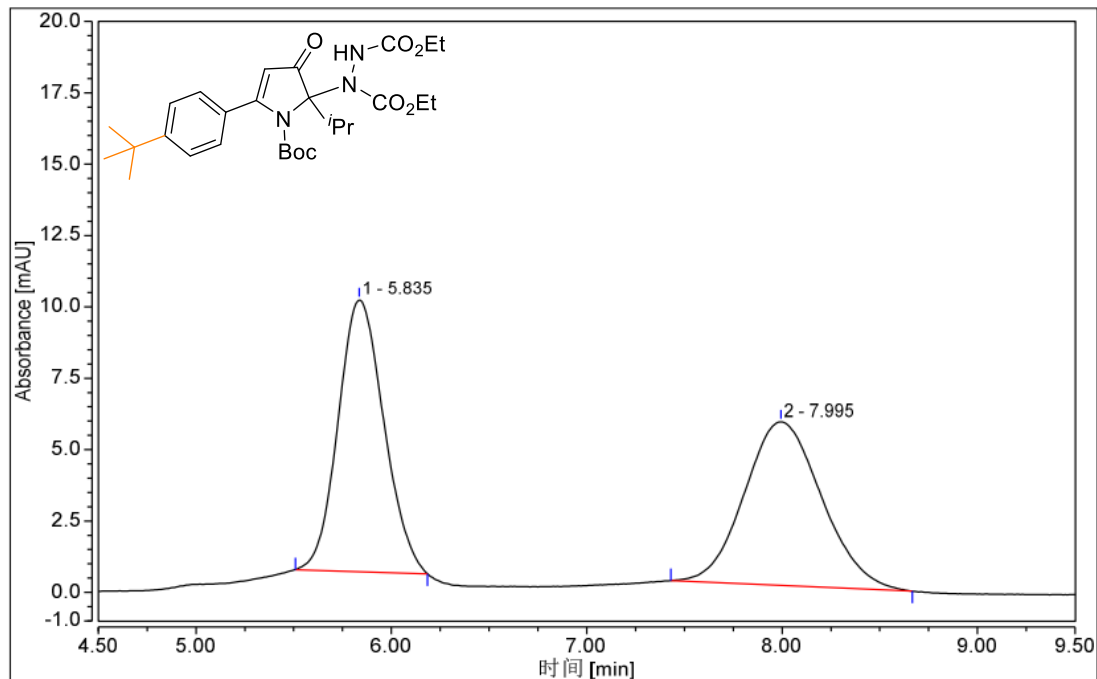

| Peak | RT min | Aera mAU*min | Height mAU | Area % | Height % |
|------|--------|--------------|------------|--------|----------|
| 1    | 5.835  | 2.585        | 9.523      | 49.61  | 62.42    |
| 2    | 7.995  | 2.626        | 5.734      | 50.39  | 37.58    |

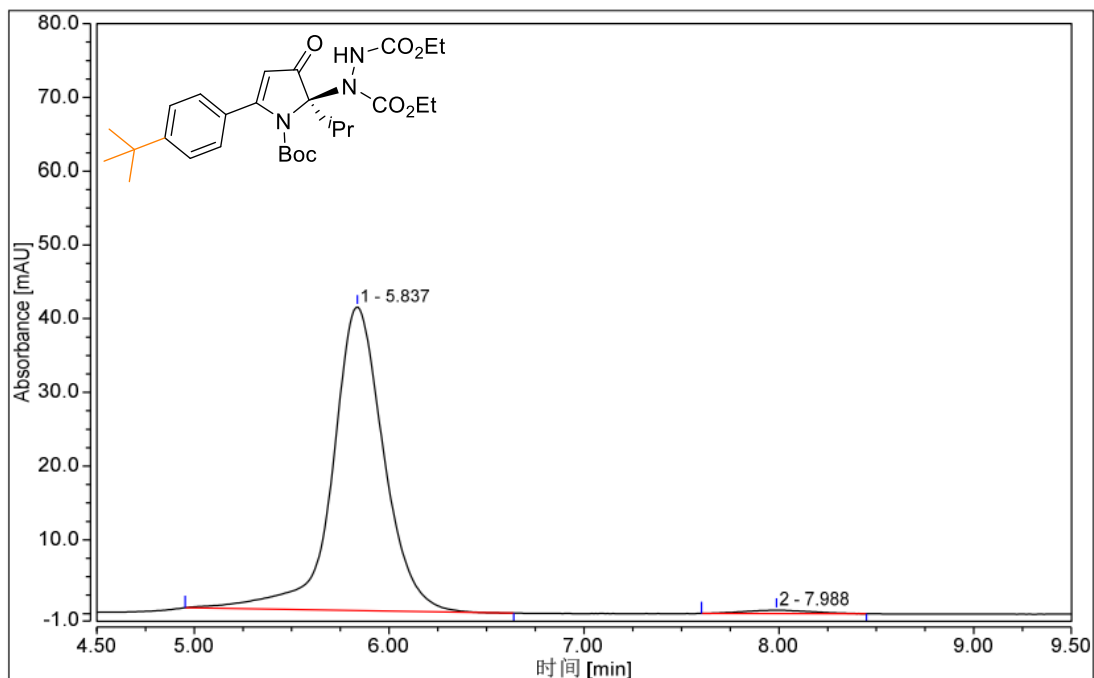

| Peak | RT min | Aera mAU*min | Height mAU | Area % | Height % |
|------|--------|--------------|------------|--------|----------|
| 1    | 5.837  | 12.608       | 41.175     | 98.55  | 98.91    |
| 2    | 7.988  | 0.186        | 0.455      | 1.45   | 1.09     |



**diethyl (R)-1-(5-([1,1'-biphenyl]-4-yl)-1-(tert-butoxycarbonyl)-2-isopropyl-3-oxo-2,3-dihydro-1H-pyrrol-2-yl)hydrazine-1,2-dicarboxylate (S3r)**

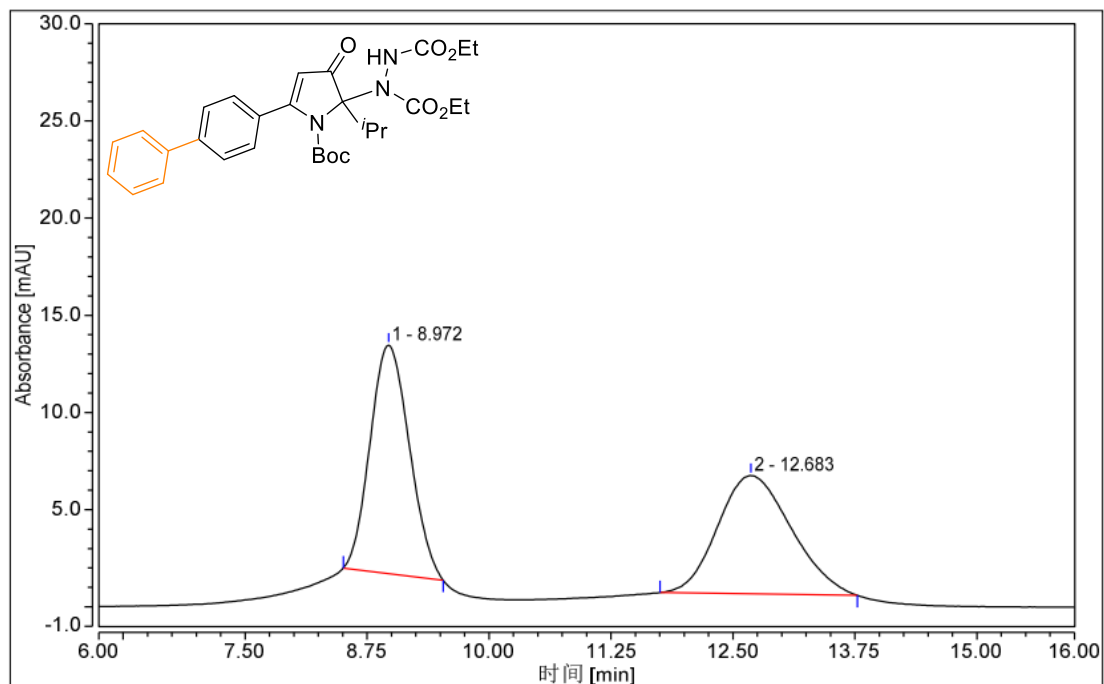

| Peak | RT min | Aera mAU*min | Height mAU | Area % | Height % |
|------|--------|--------------|------------|--------|----------|
| 1    | 8.972  | 5.488        | 11.756     | 50.81  | 65.88    |
| 2    | 12.683 | 5.314        | 6.088      | 49.19  | 34.12    |

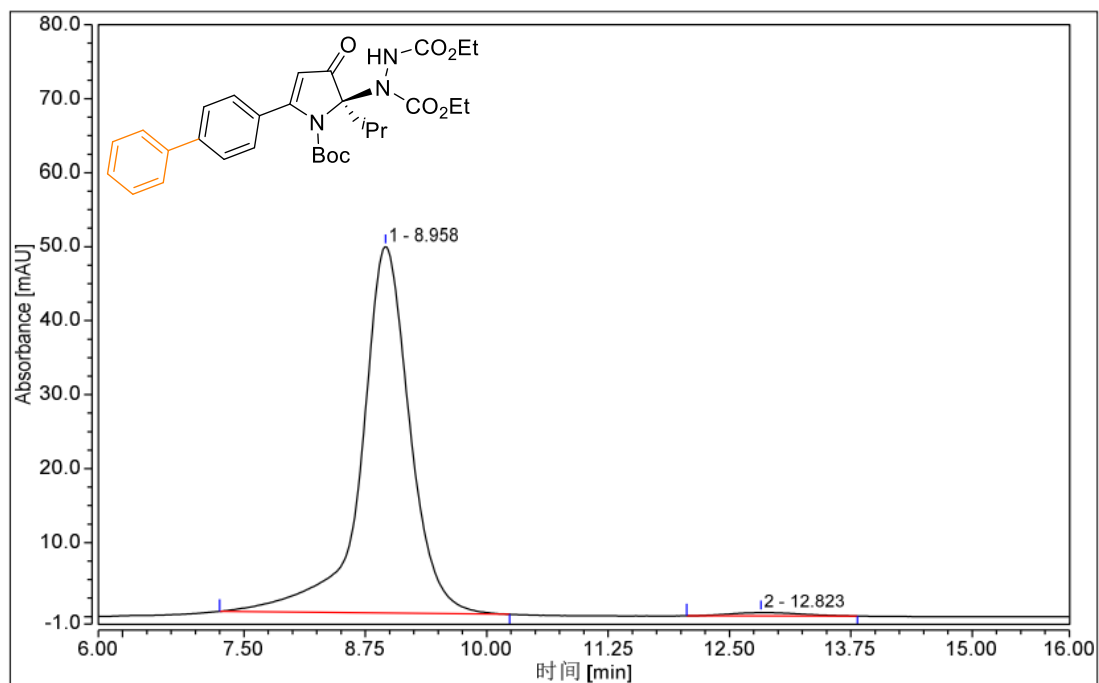

| Peak | RT min | Aera mAU*min | Height mAU | Area % | Height % |
|------|--------|--------------|------------|--------|----------|
| 1    | 8.958  | 28.908       | 49.543     | 98.68  | 99.07    |
| 2    | 12.823 | 0.388        | 0.463      | 1.32   | 0.93     |

**diethyl (*R*)-1-(1-(tert-butoxycarbonyl)-5-(4'-ethyl-[1,1'-biphenyl]-4-yl)-2-isopropyl-3-oxo-2,3-dihydro-1H-pyrrol-2-yl)hydrazine-1,2-dicarboxylate (S3s)**

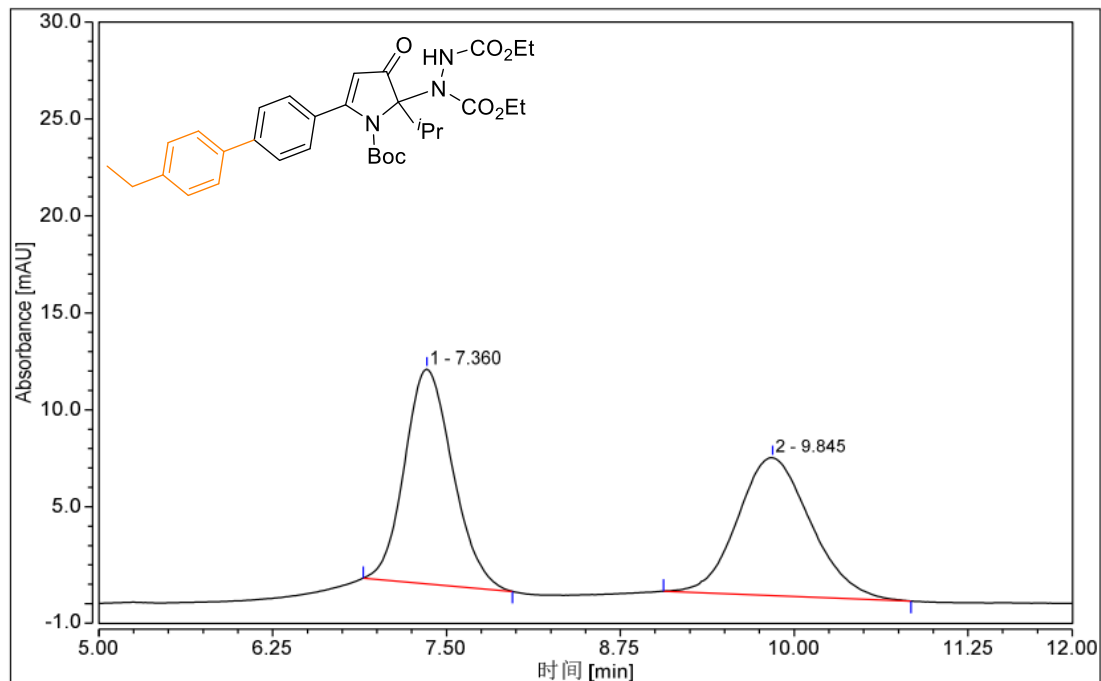

| Peak | RT min | Aera mAU*min | Height mAU | Area % | Height % |
|------|--------|--------------|------------|--------|----------|
| 1    | 7.360  | 4.458        | 11.083     | 50.74  | 60.92    |
| 2    | 9.845  | 4.328        | 7.110      | 49.26  | 39.08    |

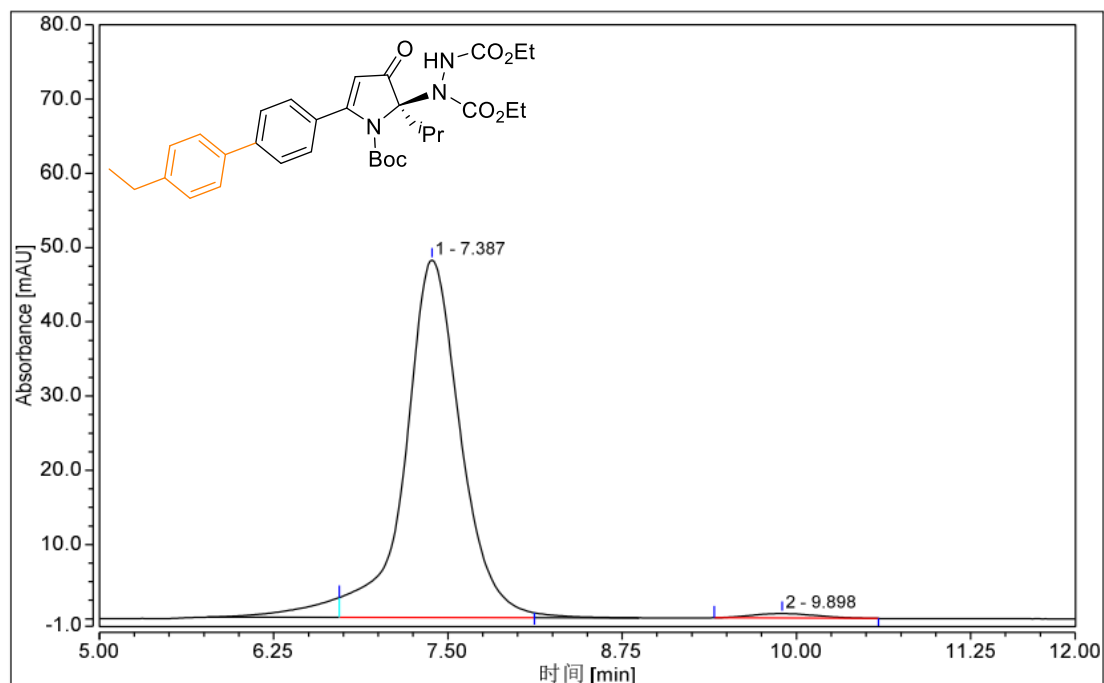

| Peak | RT min | Aera mAU*min | Height mAU | Area % | Height % |
|------|--------|--------------|------------|--------|----------|
| 1    | 7.387  | 21.991       | 48.124     | 98.54  | 98.76    |
| 2    | 9.898  | 0.327        | 0.604      | 1.46   | 1.24     |

diethyl (*R*)-1-(1-(tert-butoxycarbonyl)-5-(4-ethoxyphenyl)-2-isopropyl-3-oxo-2,3-dihydro-1H-pyrrol-2-yl)hydrazine-1,2-dicarboxylate (S3t)

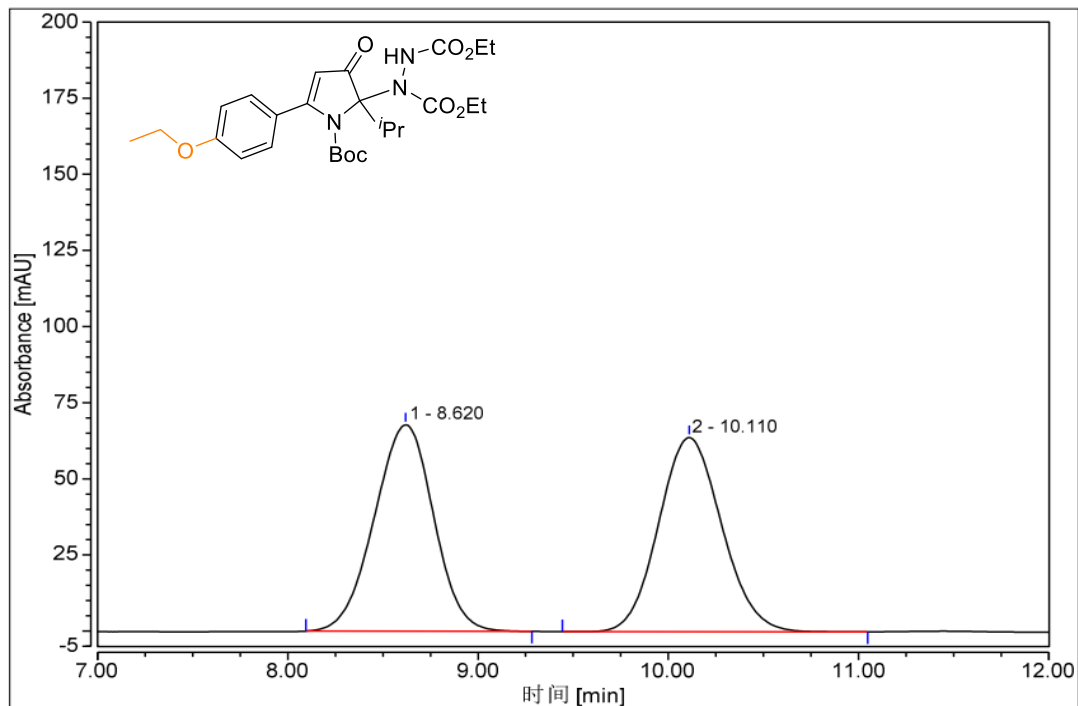

| Peak | RT min | Area mAU*min | Height mAU | Area % | Height % |
|------|--------|--------------|------------|--------|----------|
| 1    | 8.620  | 24.519       | 67.788     | 50.02  | 51.53    |
| 2    | 10.110 | 24.499       | 63.771     | 49.98  | 48.47    |

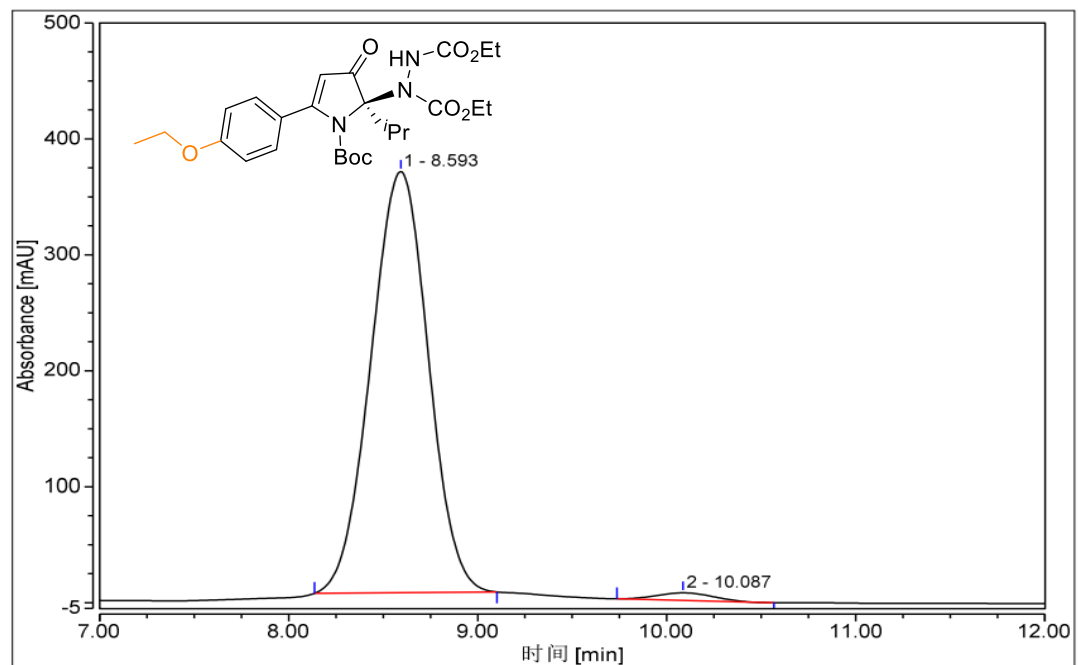

| Peak | RT min | Area mAU*min | Height mAU | Area % | Height % |
|------|--------|--------------|------------|--------|----------|
| 1    | 8.593  | 127.856      | 363.457    | 98.25  | 98.22    |
| 2    | 10.087 | 2.275        | 6.572      | 1.75   | 1.78     |

**diethyl (R)-1-(1-(tert-butoxycarbonyl)-2-isopropyl-3-oxo-5-(4-(trifluoromethyl)phenyl)-2,3-dihydro-1H-pyrrol-2-yl)hydrazine-1,2-dicarboxylate (S3u)**

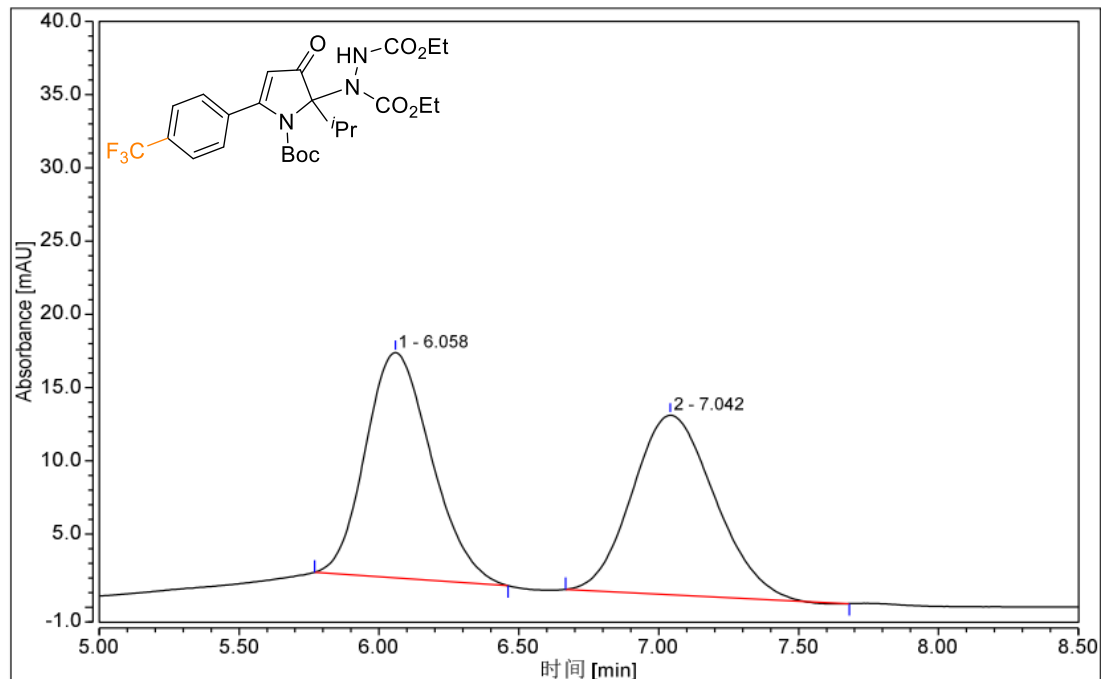

| Peak | RT min | Aera mAU*min | Height mAU | Area % | Height % |
|------|--------|--------------|------------|--------|----------|
| 1    | 6.058  | 4.205        | 15.379     | 50.12  | 55.66    |
| 2    | 7.042  | 4.185        | 12.249     | 49.88  | 44.34    |

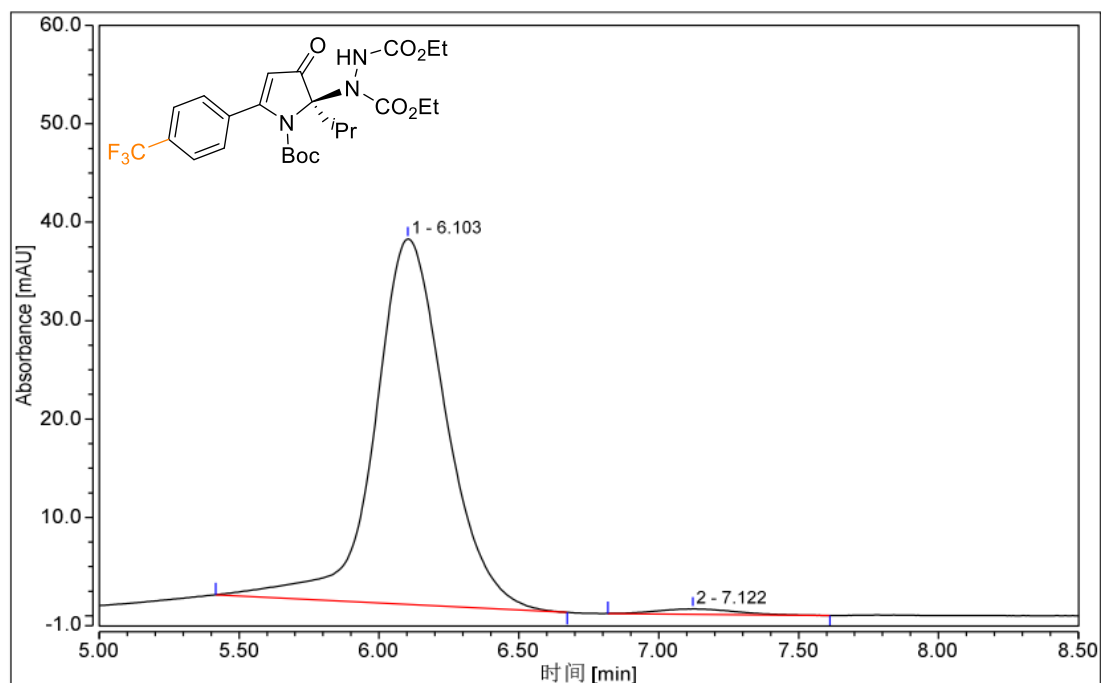

| Peak | RT min | Aera mAU*min | Height mAU | Area % | Height % |
|------|--------|--------------|------------|--------|----------|
| 1    | 6.103  | 11.036       | 37.135     | 98.45  | 98.55    |
| 2    | 7.122  | 0.174        | 0.544      | 1.55   | 1.45     |

**diethyl (R)-1-(1-(tert-butoxycarbonyl)-5-(3-fluorophenyl)-2-isopropyl-3-oxo-2,3-dihydro-1H-pyrrol-2-yl)hydrazine-1,2-dicarboxylate (S3v)**

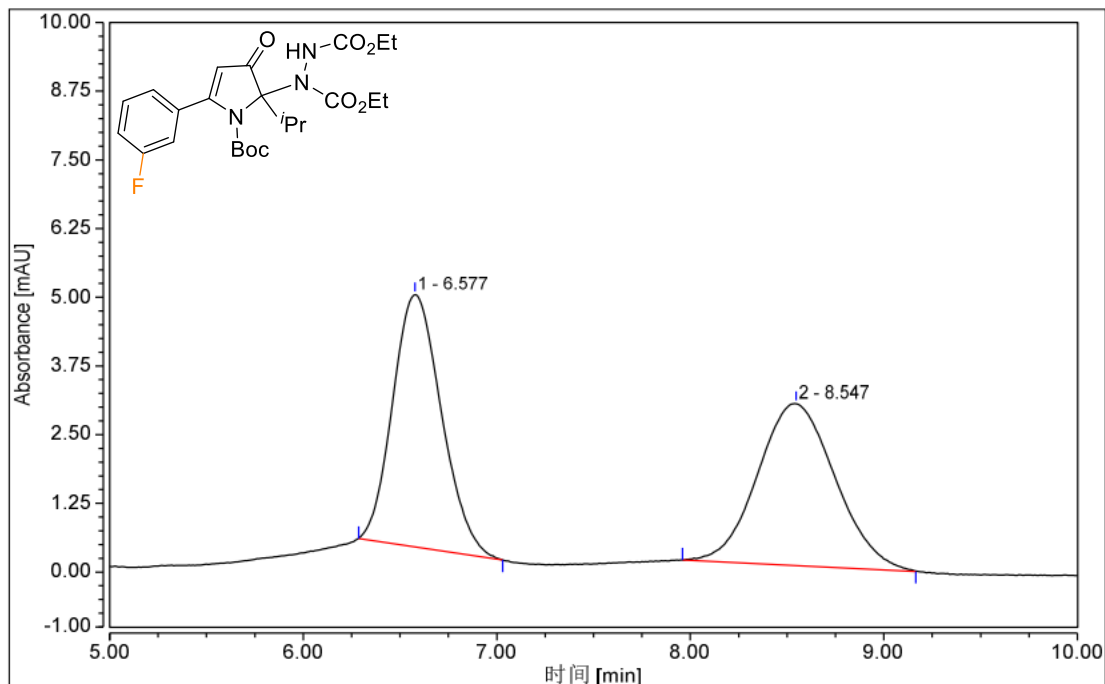

| Peak | RT min | Aera mAU*min | Height mAU | Area % | Height % |
|------|--------|--------------|------------|--------|----------|
| 1    | 6.577  | 1.340        | 4.592      | 49.51  | 60.87    |
| 2    | 8.547  | 1.366        | 2.952      | 50.49  | 39.13    |

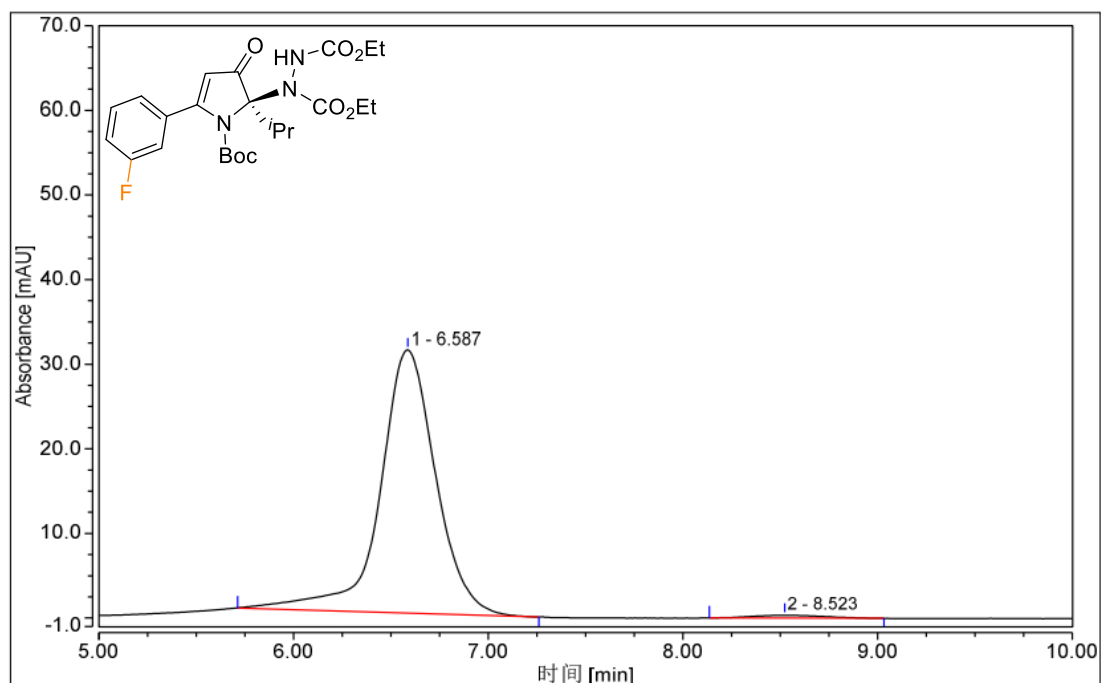

| Peak | RT min | Aera mAU*min | Height mAU | Area % | Height % |
|------|--------|--------------|------------|--------|----------|
| 1    | 6.587  | 10.346       | 31.117     | 98.60  | 98.94    |
| 2    | 8.523  | 0.147        | 0.334      | 1.40   | 1.06     |

**diethyl (R)-1-(5-(3-bromophenyl)-1-(tert-butoxycarbonyl)-2-isopropyl-3-oxo-2,3-dihydro-1H-pyrrol-2-yl)hydrazine-1,2-dicarboxylate (S3w)**

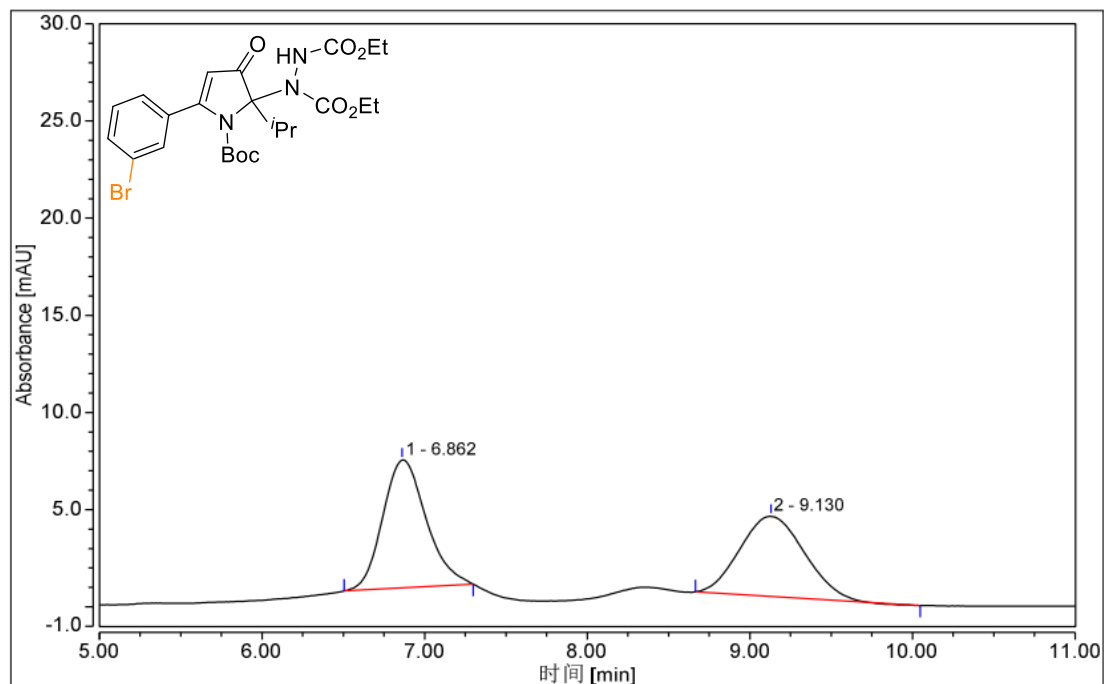

| Peak | RT min | Aera mAU*min | Height mAU | Area % | Height % |
|------|--------|--------------|------------|--------|----------|
| 1    | 6.862  | 2.039        | 6.584      | 51.89  | 61.49    |
| 2    | 9.130  | 1.890        | 4.123      | 48.11  | 38.51    |

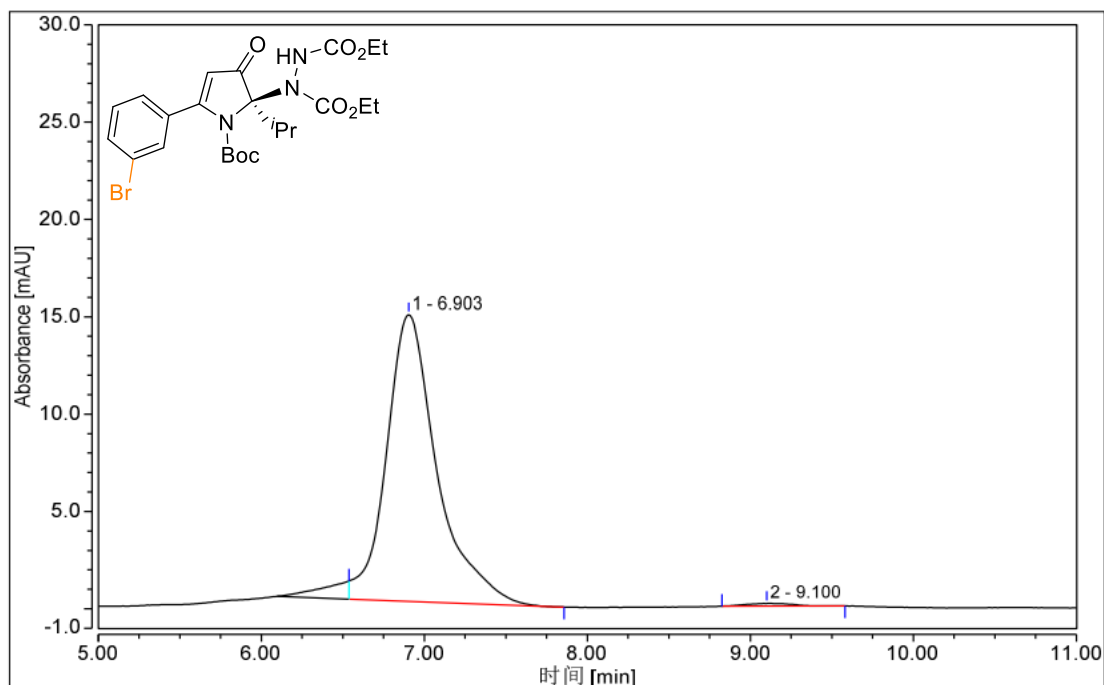

| Peak | RT min | Aera mAU*min | Height mAU | Area % | Height % |
|------|--------|--------------|------------|--------|----------|
| 1    | 6.903  | 5.279        | 14.730     | 99.19  | 99.07    |
| 2    | 9.100  | 0.043        | 0.138      | 0.81   | 0.93     |

diethyl (*R*)-1-(5-(3,5-bis(trifluoromethyl)phenyl)-1-(tert-butoxycarbonyl)-2-isopropyl-3-oxo-2,3-dihydro-1H-pyrrol-2-yl)hydrazine-1,2-dicarboxylate (S3x)

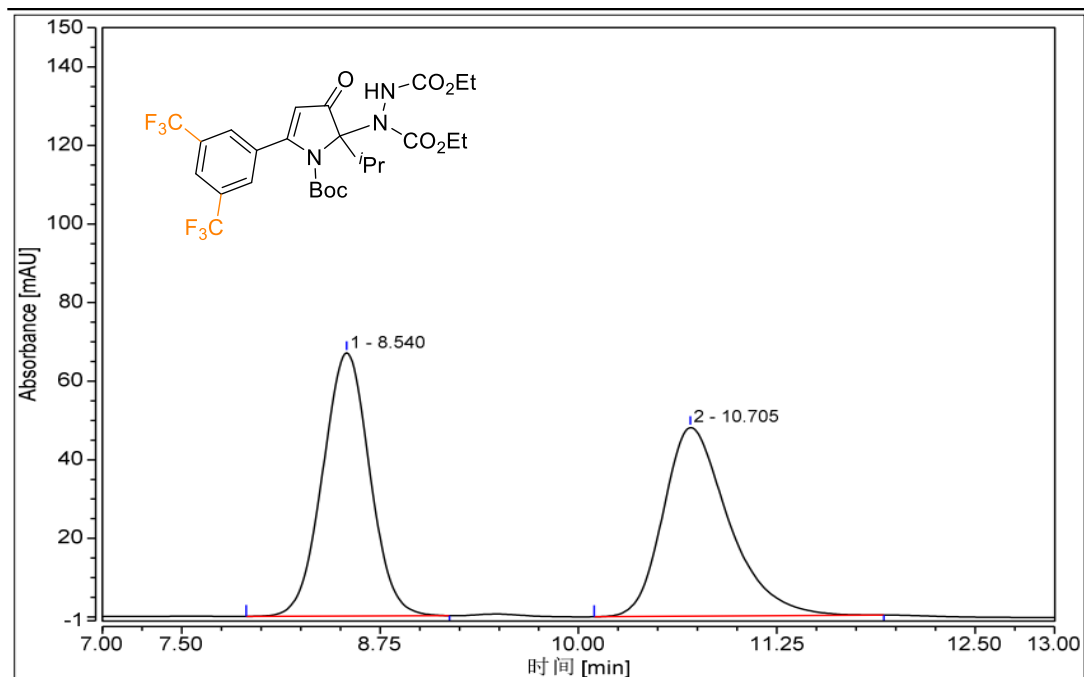

| Peak | RT min | Area mAU*min | Height mAU | Area % | Height % |
|------|--------|--------------|------------|--------|----------|
| 1    | 8.540  | 23.063       | 67.011     | 50.12  | 58.27    |
| 2    | 10.705 | 22.956       | 47.999     | 49.88  | 41.73    |

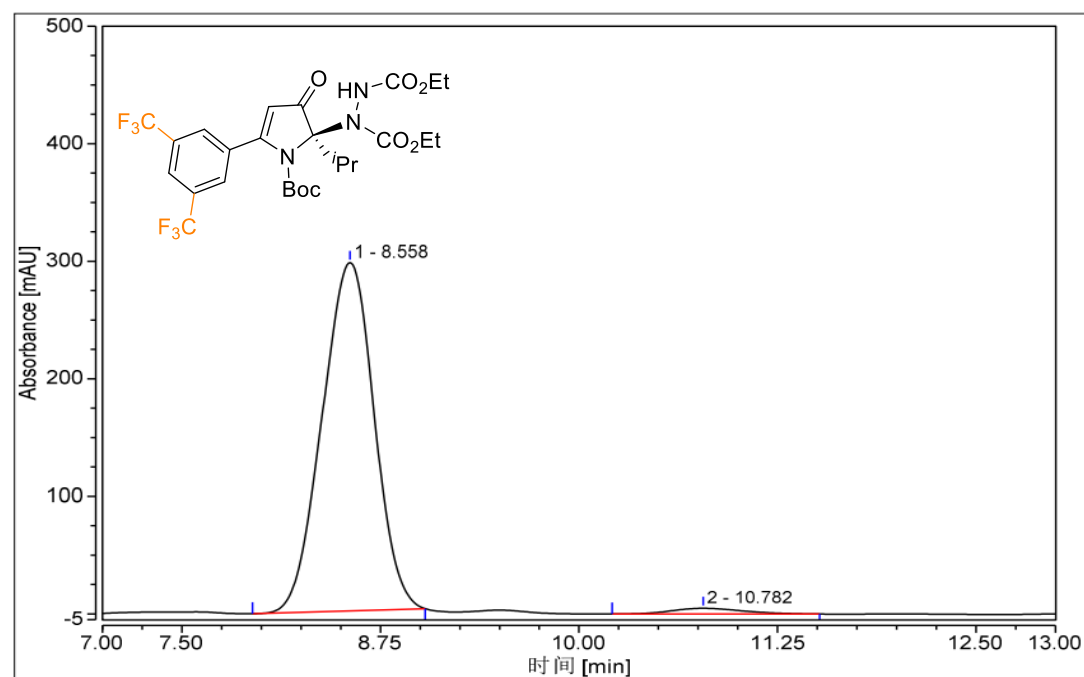

| Peak | RT min | Area mAU*min | Height mAU | Area % | Height % |
|------|--------|--------------|------------|--------|----------|
| 1    | 8.558  | 112.426      | 296.360    | 97.78  | 98.38    |
| 2    | 10.782 | 2.556        | 4.895      | 2.22   | 1.62     |

**diethyl (R)-1-(1-(tert-butoxycarbonyl)-2-isopropyl-5-(naphthalen-1-yl)-3-oxo-2,3-dihydro-1H-pyrrol-2-yl)hydrazine-1,2-dicarboxylate (S3y)**

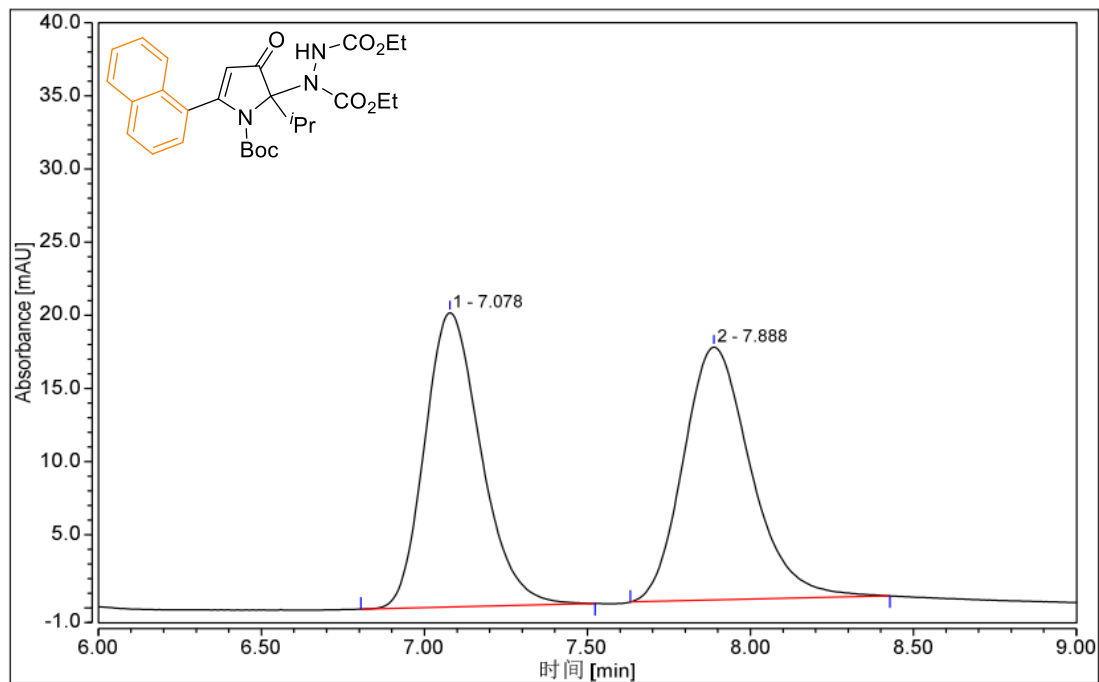

| Peak | RT min | Aera mAU*min | Height mAU | Area % | Height % |
|------|--------|--------------|------------|--------|----------|
| 1    | 7.078  | 4.021        | 20.128     | 49.22  | 53.78    |
| 2    | 7.888  | 4.148        | 17.299     | 50.78  | 46.22    |

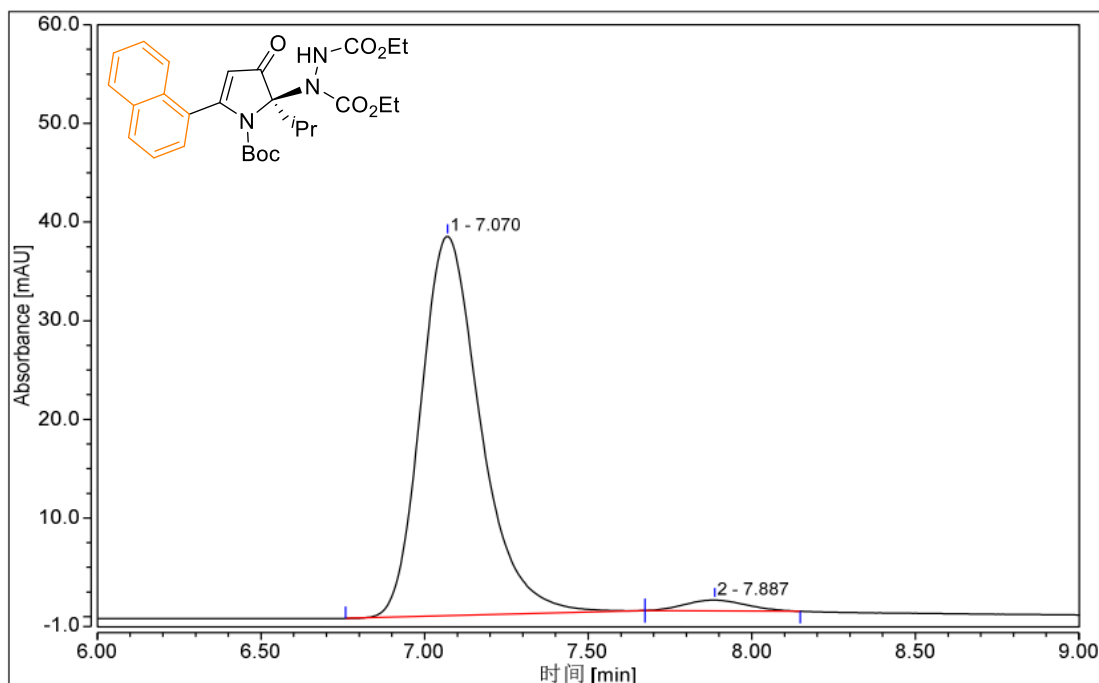

| Peak | RT min | Aera mAU*min | Height mAU | Area % | Height % |
|------|--------|--------------|------------|--------|----------|
| 1    | 7.070  | 8.121        | 38.463     | 97.11  | 97.20    |
| 2    | 7.887  | 0.242        | 1.110      | 2.89   | 2.80     |



diisopropyl (*R*)-1-(1-(tert-butoxycarbonyl)-2-butyl-3-oxo-5-phenyl-2,3-dihydro-1H-pyrrol-2-yl)hydrazine-1,2-dicarboxylate (S3z)

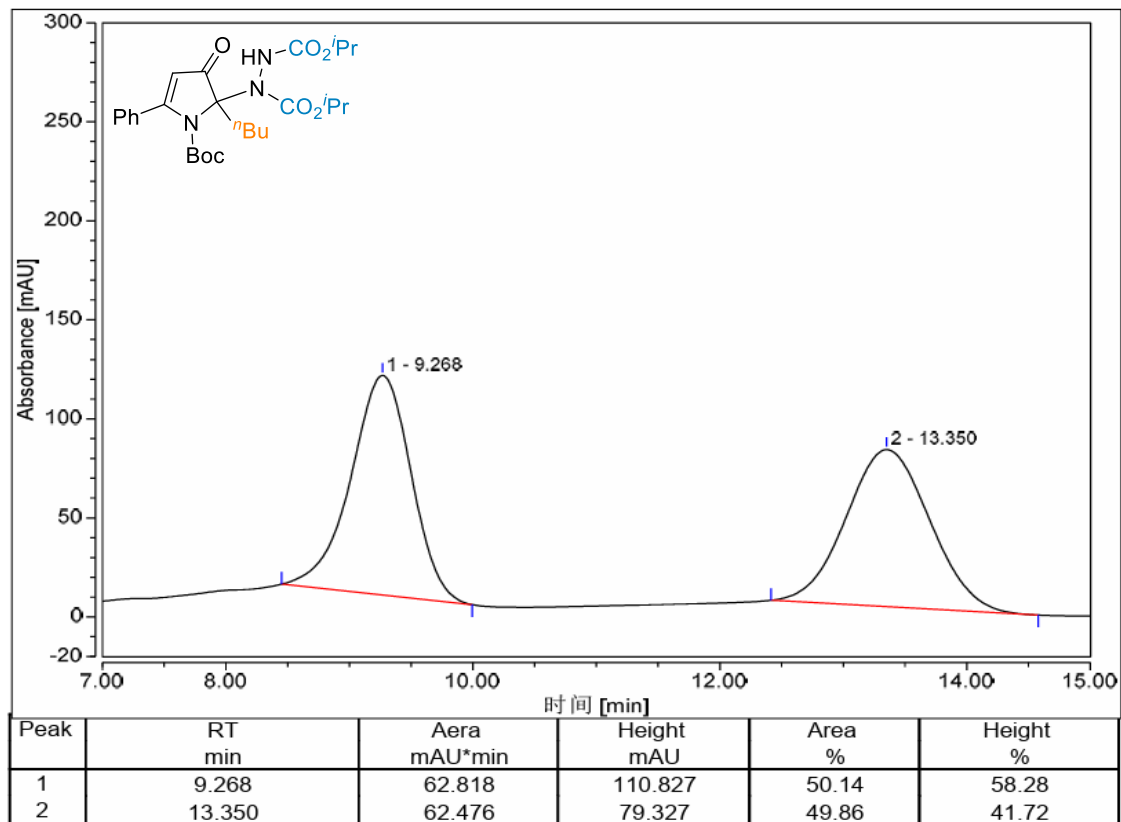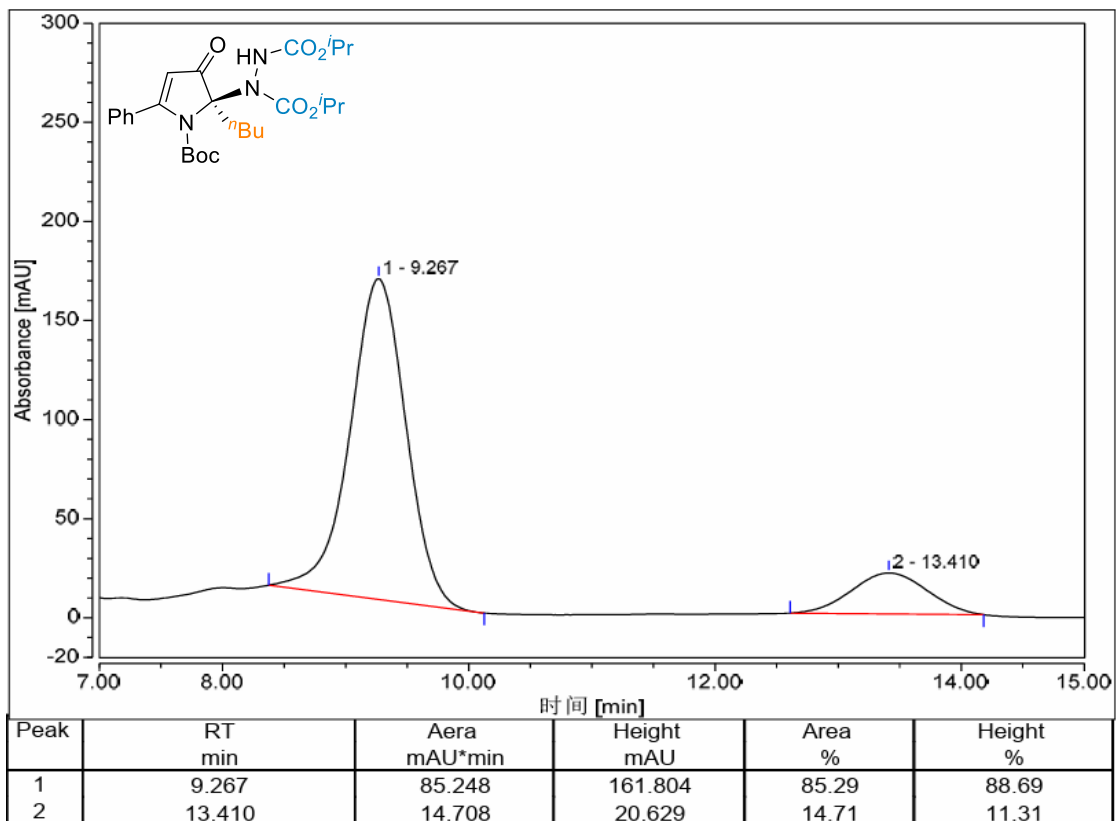

diethyl (*R*)-1-(1-(tert-butoxycarbonyl)-2-(4-nitrobenzyl)-3-oxo-5-phenyl-2,3-dihydro-1H-pyrrol-2-yl)hydrazine-1,2-dicarboxylate (S3aa)

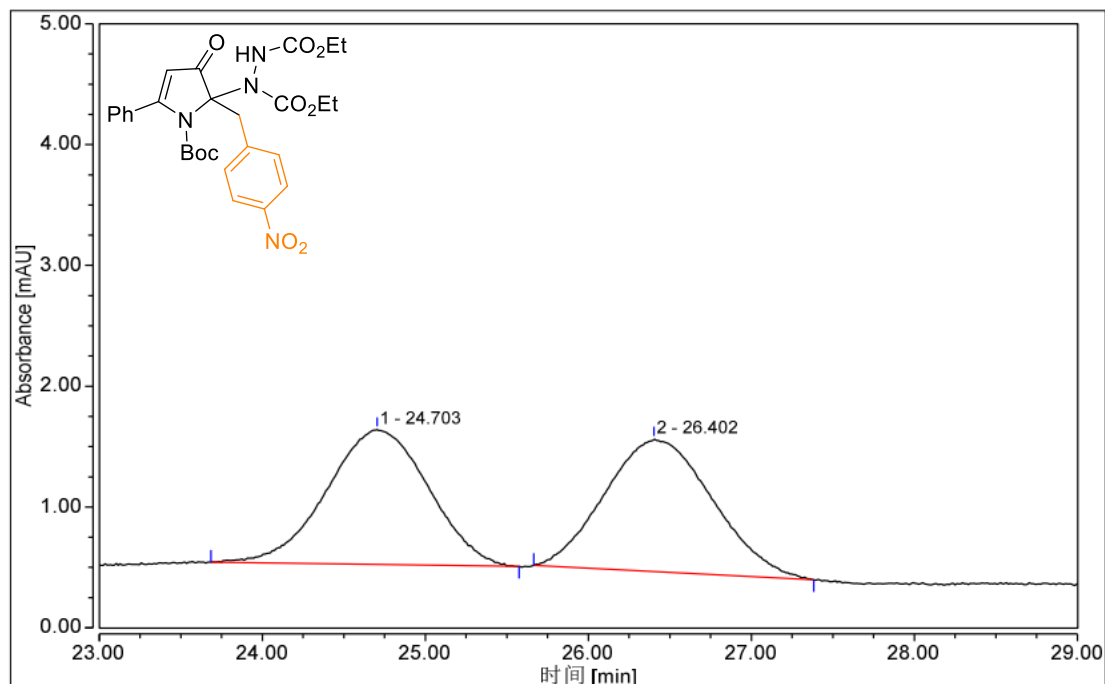

| Peak | RT min | Aera mAU*min | Height mAU | Area % | Height % |
|------|--------|--------------|------------|--------|----------|
| 1    | 24.703 | 0.805        | 1.117      | 49.02  | 50.41    |
| 2    | 26.402 | 0.838        | 1.099      | 50.98  | 49.59    |

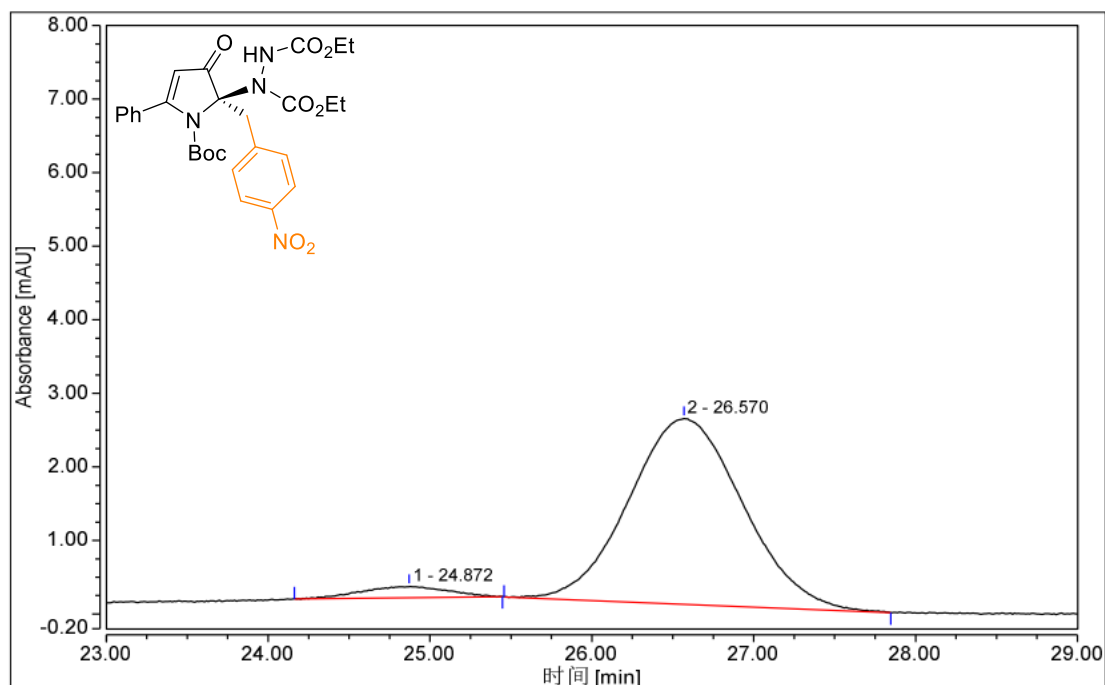

| Peak | RT min | Aera mAU*min | Height mAU | Area % | Height % |
|------|--------|--------------|------------|--------|----------|
| 1    | 24.872 | 0.094        | 0.154      | 4.37   | 5.73     |
| 2    | 26.570 | 2.065        | 2.528      | 95.63  | 94.27    |

**diisopropyl (*R*)-1-(1-(tert-butoxycarbonyl)-2-(4-nitrobenzyl)-3-oxo-5-phenyl-2,3-dihydro-1H-pyrrol-2-yl)hydrazine-1,2-dicarboxylate (S3ab)**

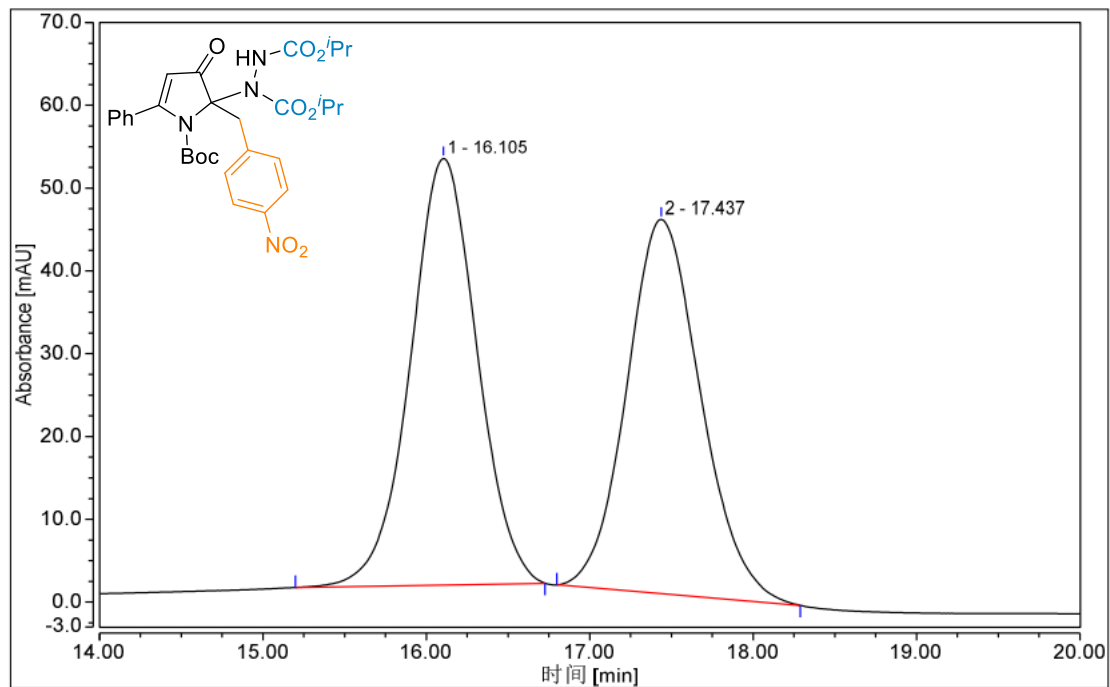

| Peak | RT min | Aera mAU*min | Height mAU | Area % | Height % |
|------|--------|--------------|------------|--------|----------|
| 1    | 16.105 | 24.335       | 51.492     | 50.63  | 53.25    |
| 2    | 17.437 | 23.732       | 45.203     | 49.37  | 46.75    |

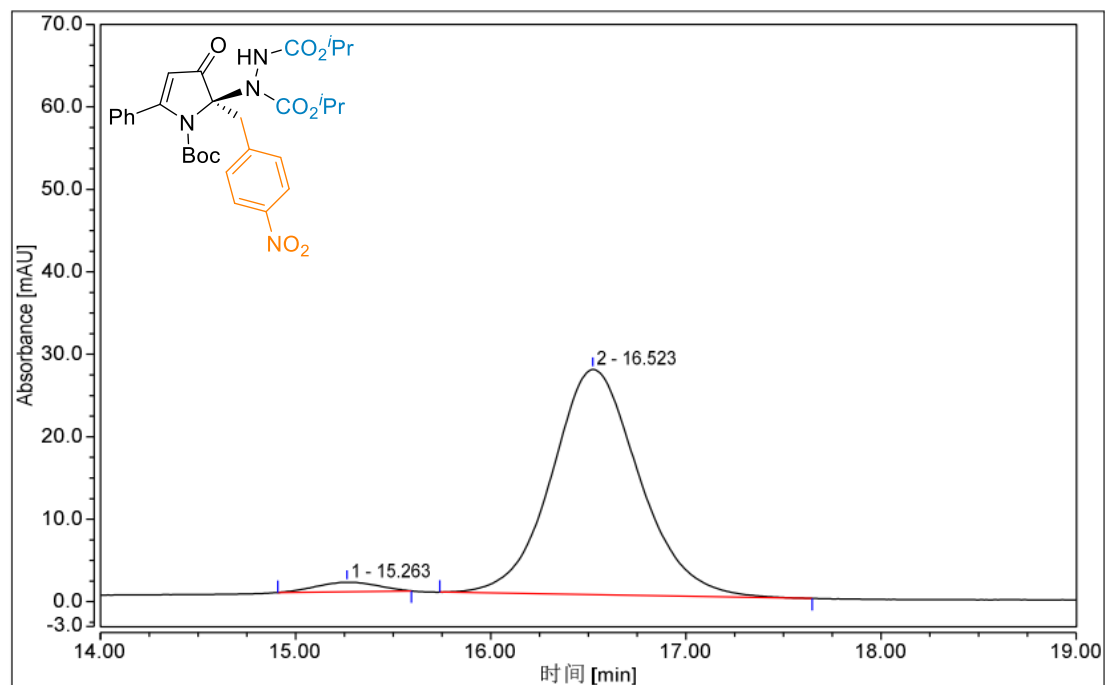

| Peak | RT min | Aera mAU*min | Height mAU | Area % | Height % |
|------|--------|--------------|------------|--------|----------|
| 1    | 15.263 | 0.414        | 1.142      | 2.83   | 4.01     |
| 2    | 16.523 | 14.195       | 27.319     | 97.17  | 95.99    |

diethyl (*R*)-1-(1-((benzyloxy)carbonyl)-2-isopropyl-3-oxo-5-phenyl-2,3-dihydro-1H-pyrrol-2-yl)hydrazine-1,2-dicarboxylate (S3ac)

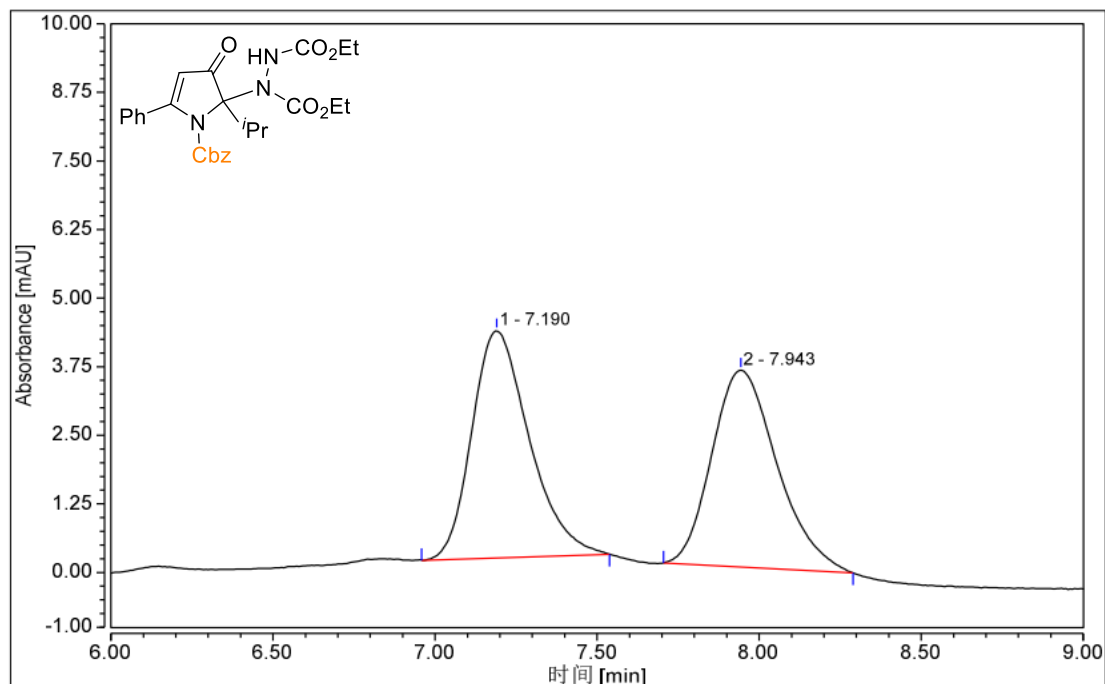

| Peak | RT min | Aera mAU*min | Height mAU | Area % | Height % |
|------|--------|--------------|------------|--------|----------|
| 1    | 7.190  | 0.851        | 4.147      | 50.37  | 53.60    |
| 2    | 7.943  | 0.838        | 3.591      | 49.63  | 46.40    |

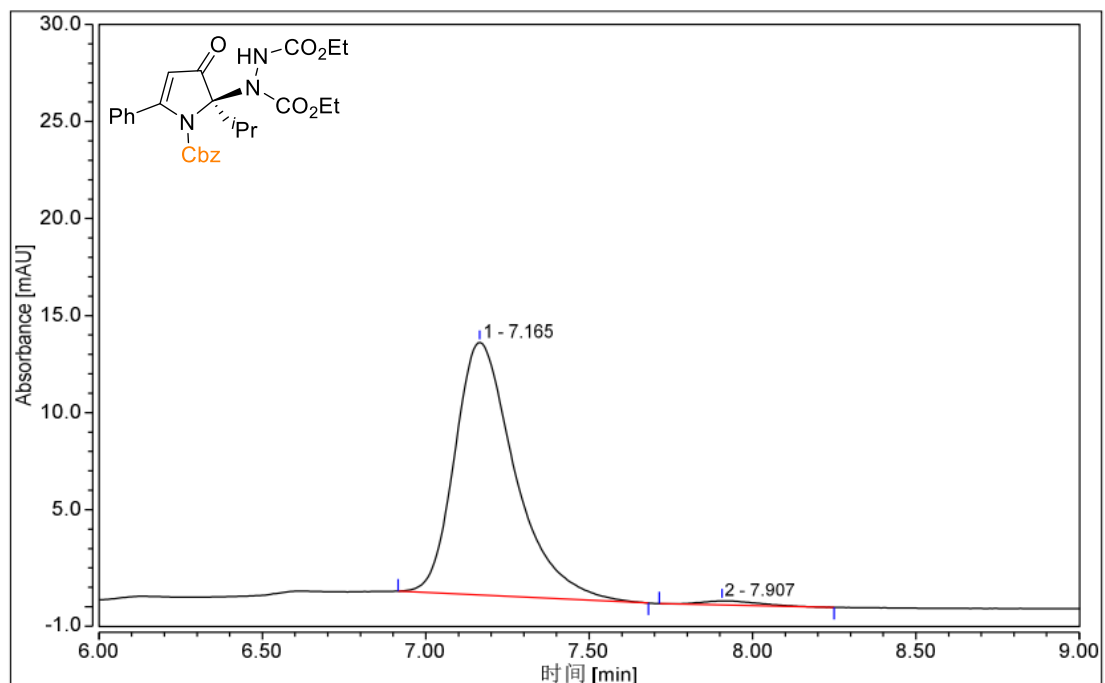

| Peak | RT min | Aera mAU*min | Height mAU | Area % | Height % |
|------|--------|--------------|------------|--------|----------|
| 1    | 7.165  | 2.778        | 13.012     | 98.47  | 98.42    |
| 2    | 7.907  | 0.043        | 0.208      | 1.53   | 1.58     |

**Diisopropyl-1-(1-(tert-butoxycarbonyl)-2-methyl-3-oxo-5-phenyl-2,3-dihydro-1H-pyrrol-2-yl)-2-(2-(ethoxycarbonyl)allyl)hydrazine-1,2-dicarboxylate (5)**

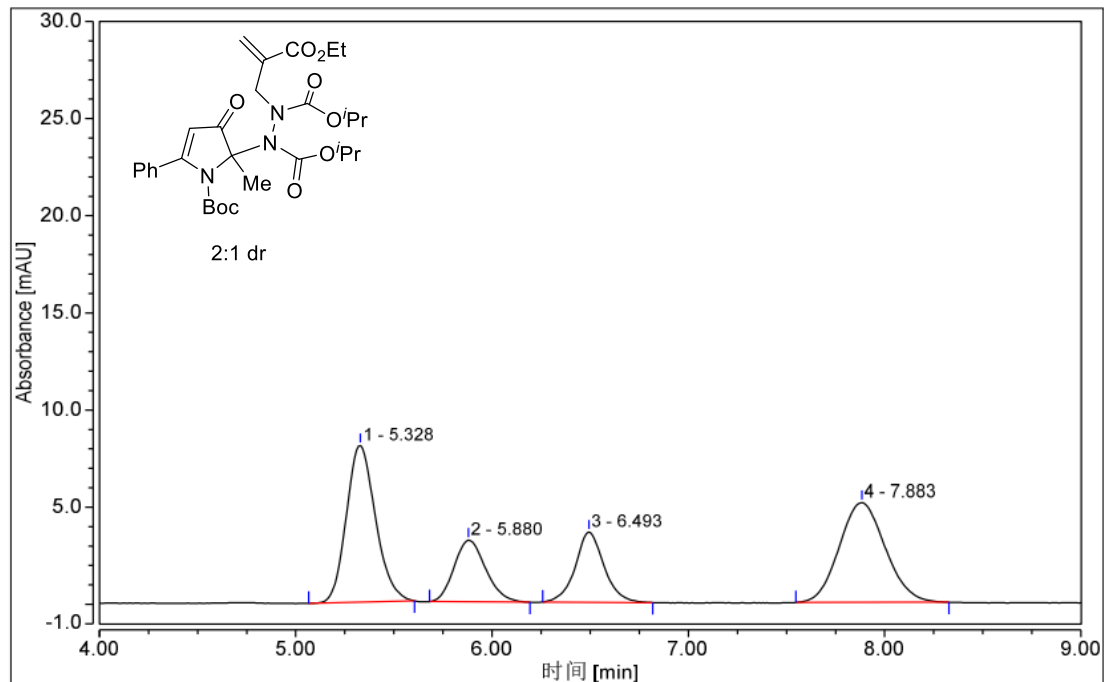

| Peak | RT min | Aera mAU*min | Height mAU | Area % | Height % |
|------|--------|--------------|------------|--------|----------|
| 1    | 5.328  | 1.390        | 8.065      | 34.81  | 40.32    |
| 2    | 5.880  | 0.592        | 3.176      | 14.83  | 15.88    |
| 3    | 6.493  | 0.615        | 3.620      | 15.40  | 18.10    |
| 4    | 7.883  | 1.396        | 5.141      | 34.97  | 25.70    |

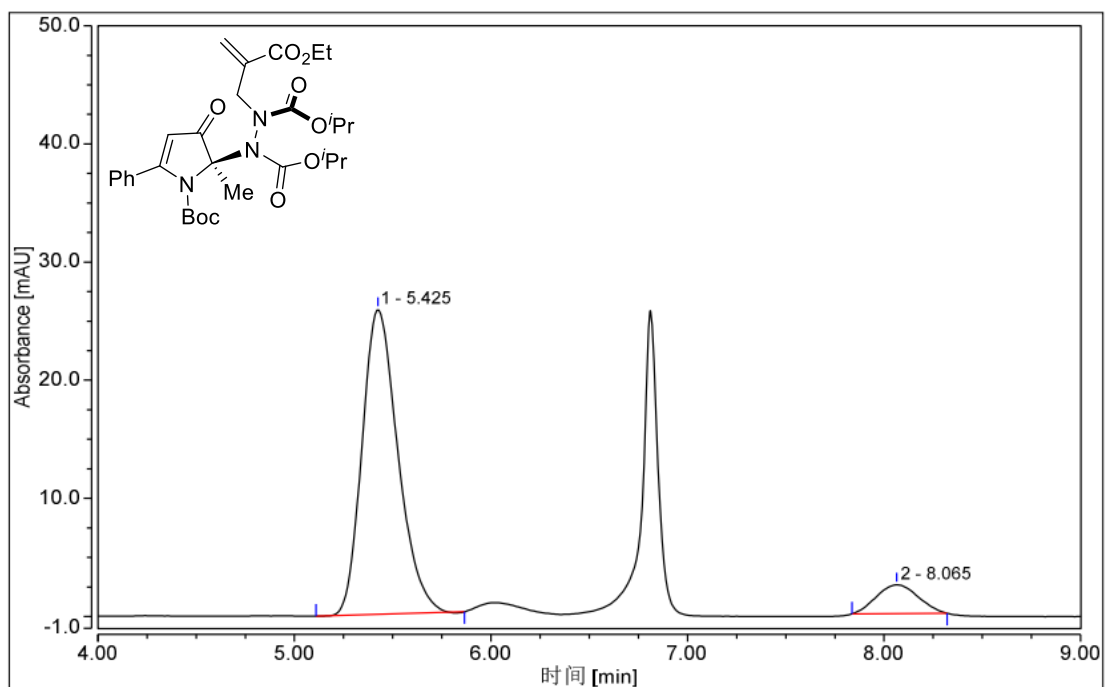

| Peak | RT min | Aera mAU*min | Height mAU | Area % | Height % |
|------|--------|--------------|------------|--------|----------|
| 1    | 5.425  | 5.444        | 25.812     | 90.06  | 91.34    |
| 2    | 8.065  | 0.601        | 2.447      | 9.94   | 8.66     |

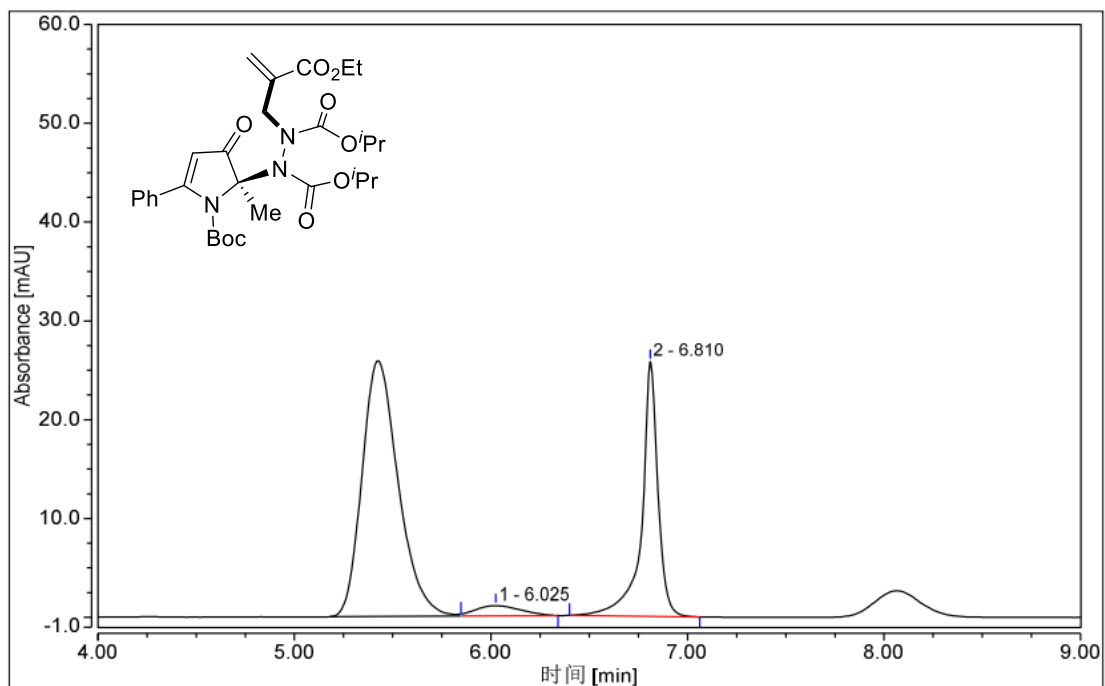

| Peak | RT min | Aera mAU*min | Height mAU | Area % | Height % |
|------|--------|--------------|------------|--------|----------|
| 1    | 6.025  | 0.271        | 1.025      | 9.89   | 3.83     |
| 2    | 6.810  | 2.471        | 25.779     | 90.11  | 96.17    |

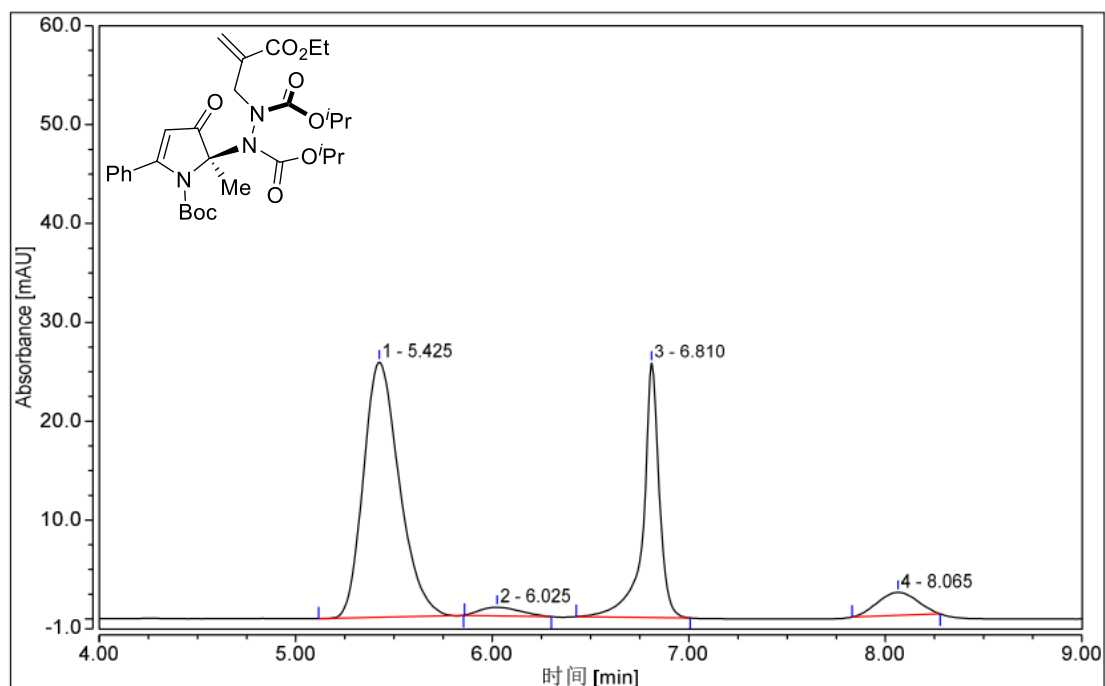

| Peak | RT min | Aera mAU*min | Height mAU | Area % | Height % |
|------|--------|--------------|------------|--------|----------|
| 1    | 5.425  | 5.460        | 25.830     | 63.09  | 47.18    |
| 2    | 6.025  | 0.203        | 0.858      | 2.34   | 1.57     |
| 3    | 6.810  | 2.444        | 25.734     | 28.24  | 47.00    |
| 4    | 8.065  | 0.547        | 2.331      | 6.32   | 4.26     |

**diisopropyl (R, R)-1-(1-(tert-butoxycarbonyl)-2-isopropyl-3-oxo-5-phenyl-2,3-dihydro-1H-pyrrol-2-yl)-2-(2-(ethoxycarbonyl)allyl)hydrazine-1,2-dicarboxylate (6a)**

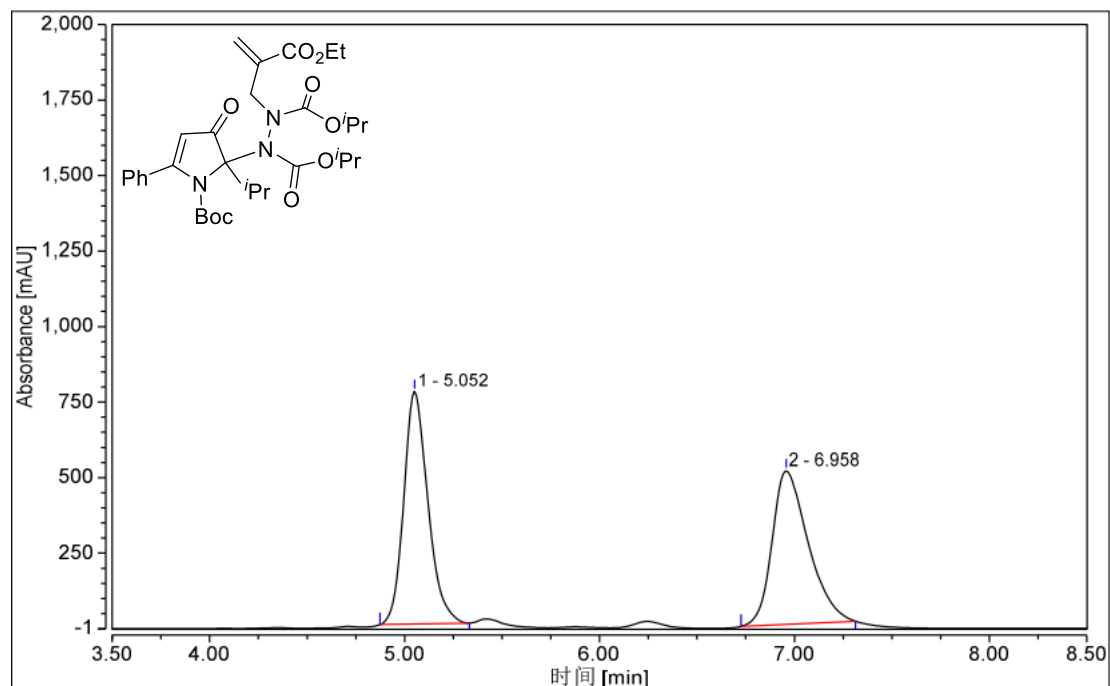

| Peak | RT min | Aera mAU*min | Height mAU | Area % | Height % |
|------|--------|--------------|------------|--------|----------|
| 1    | 5.052  | 110.657      | 769.644    | 50.36  | 60.23    |
| 2    | 6.958  | 109.067      | 508.193    | 49.64  | 39.77    |

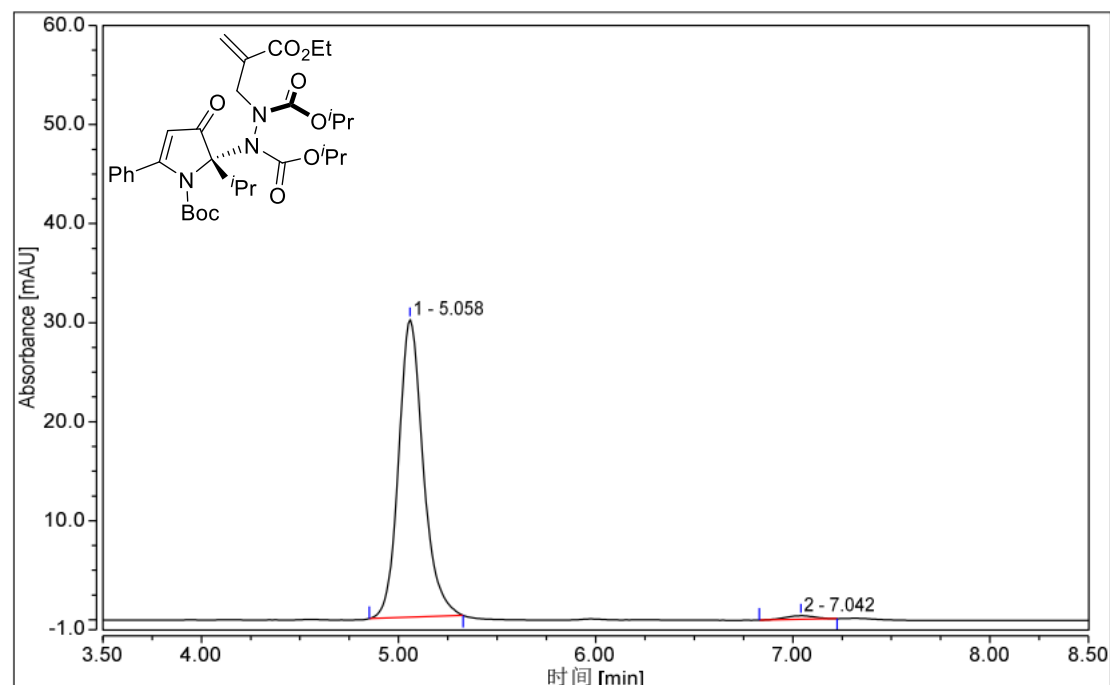

| Peak | RT min | Aera mAU*min | Height mAU | Area % | Height % |
|------|--------|--------------|------------|--------|----------|
| 1    | 5.058  | 4.350        | 30.052     | 98.54  | 98.79    |
| 2    | 7.042  | 0.064        | 0.367      | 1.46   | 1.21     |

**diisopropyl (S, S)-1-(1-(tert-butoxycarbonyl)-2-isopropyl-3-oxo-5-phenyl-2,3-dihydro-1H-pyrrol-2-yl)-2-(2-(ethoxycarbonyl)allyl)hydrazine-1,2-dicarboxylate (*ent*-6a)**

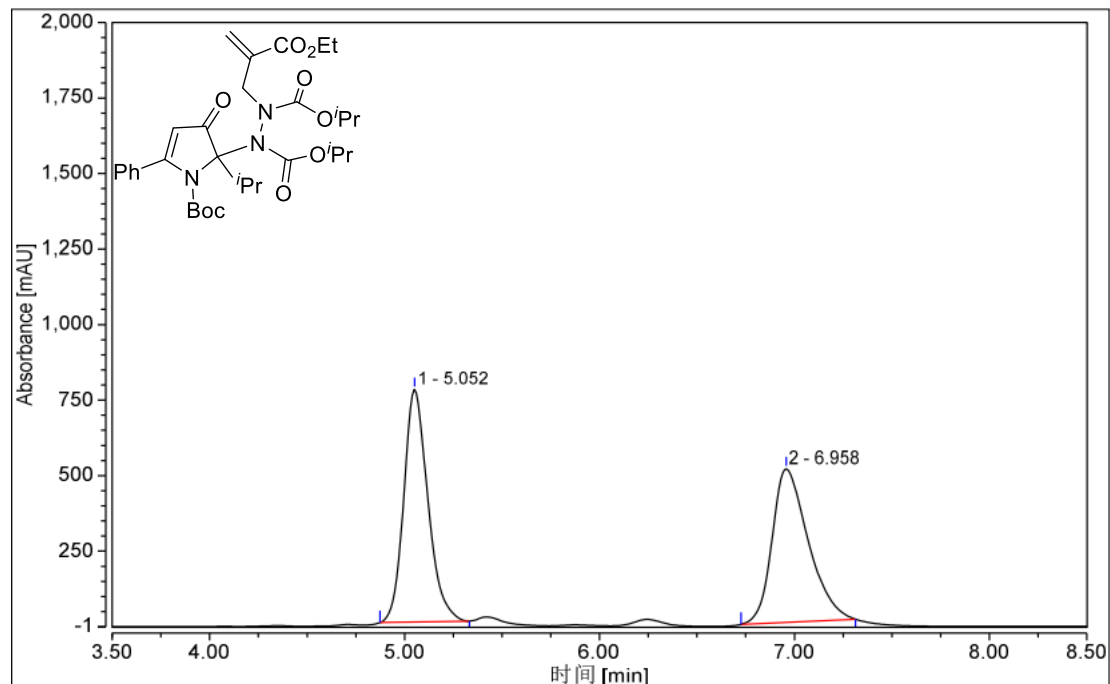

| Peak | RT min | Aera mAU*min | Height mAU | Area % | Height % |
|------|--------|--------------|------------|--------|----------|
| 1    | 5.052  | 110.657      | 769.644    | 50.36  | 60.23    |
| 2    | 6.958  | 109.067      | 508.193    | 49.64  | 39.77    |

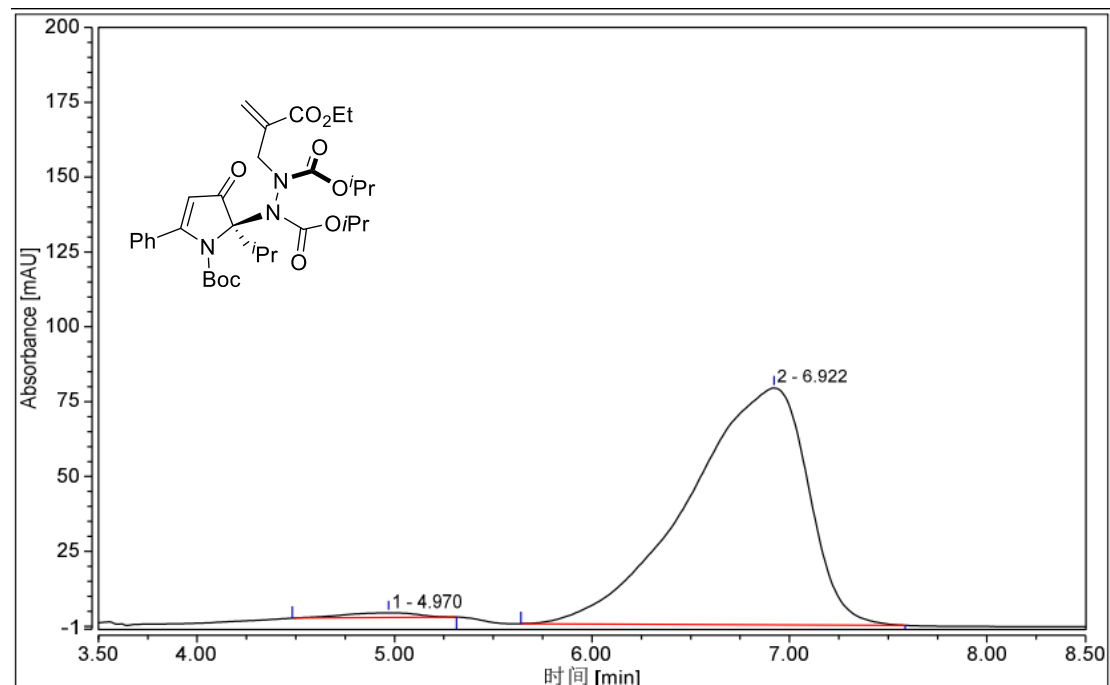

| Peak | RT min | Aera mAU*min | Height mAU | Area % | Height % |
|------|--------|--------------|------------|--------|----------|
| 1    | 4.970  | 0.682        | 1.581      | 1.22   | 1.96     |
| 2    | 6.922  | 55.364       | 79.074     | 98.78  | 98.04    |



**diisopropyl (R, R)-1-(1-(tert-butoxycarbonyl)-2-isopropyl-3-oxo-5-(m-tolyl)-2,3-dihydro-1H-pyrrol-2-yl)-2-(2-(ethoxycarbonyl)allyl)hydrazine-1,2-dicarboxylate (6b)**

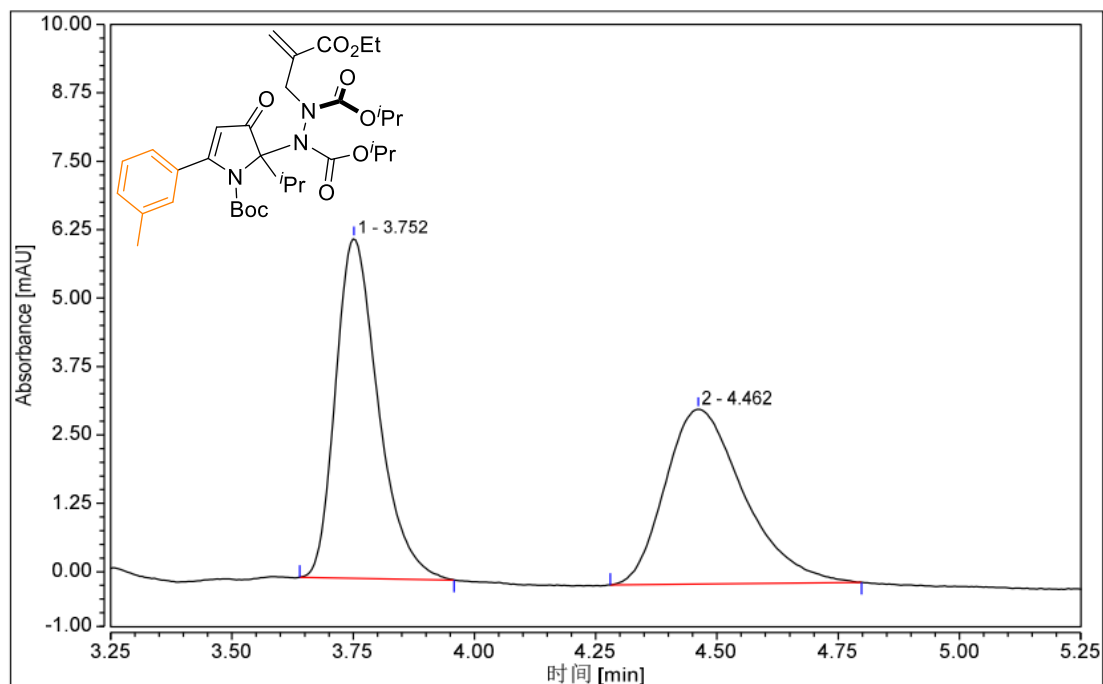

| Peak | RT min | Aera mAU*min | Height mAU | Area % | Height % |
|------|--------|--------------|------------|--------|----------|
| 1    | 3.752  | 0.634        | 6.208      | 51.34  | 66.01    |
| 2    | 4.462  | 0.601        | 3.197      | 48.66  | 33.99    |

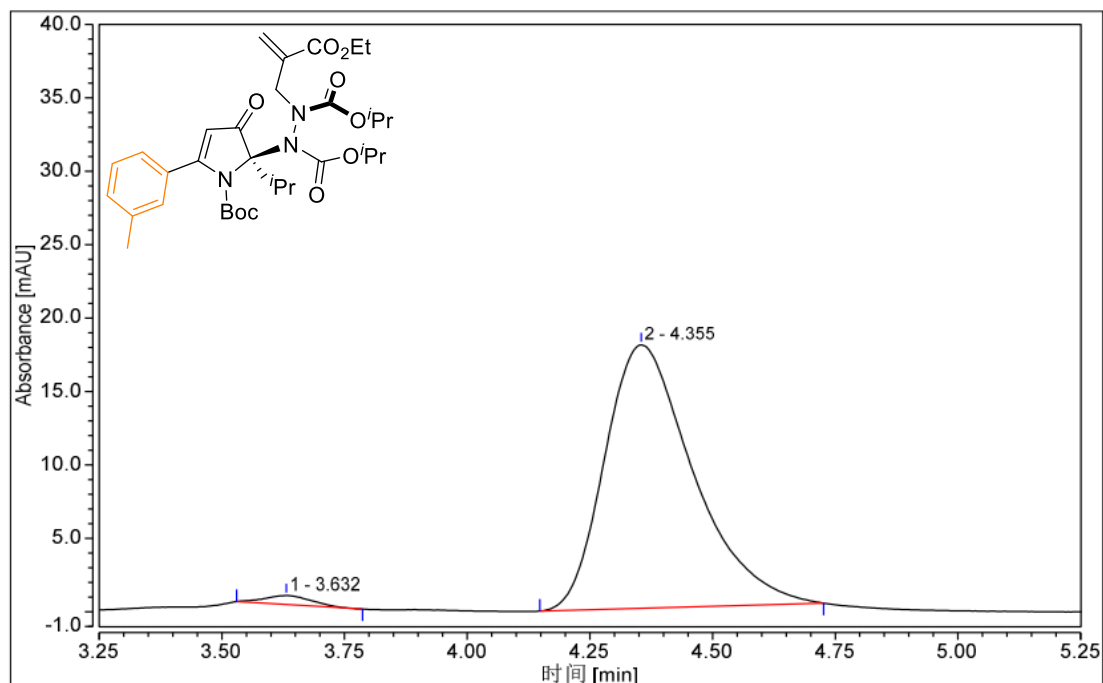

| Peak | RT min | Aera mAU*min | Height mAU | Area % | Height % |
|------|--------|--------------|------------|--------|----------|
| 1    | 3.632  | 0.068        | 0.608      | 1.77   | 3.28     |
| 2    | 4.355  | 3.749        | 17.937     | 98.23  | 96.72    |

**diisopropyl (R, R)-1-(1-(tert-butoxycarbonyl)-5-(3-fluorophenyl)-2-isopropyl-3-oxo-2,3-dihydro-1H-pyrrol-2-yl)-2-(2-(ethoxycarbonyl)allyl)hydrazine-1,2-dicarboxylate (6c)**

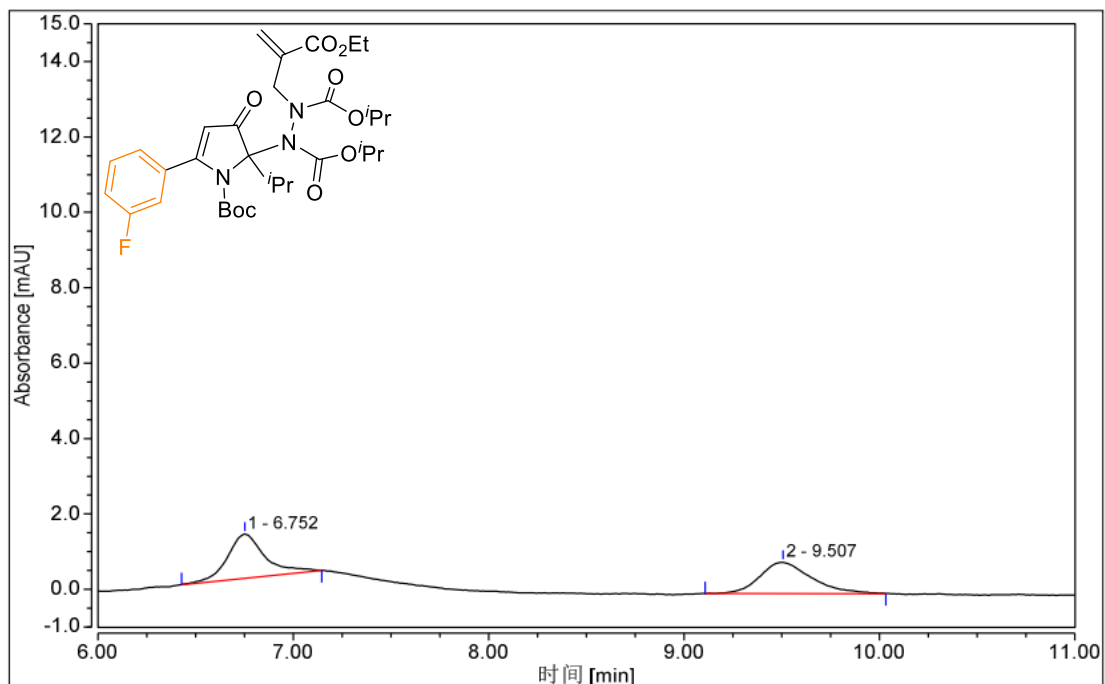

| Peak | RT min | Aera mAU*min | Height mAU | Area % | Height % |
|------|--------|--------------|------------|--------|----------|
| 1    | 6.752  | 0.262        | 1.174      | 50.67  | 58.60    |
| 2    | 9.507  | 0.255        | 0.829      | 49.33  | 41.40    |

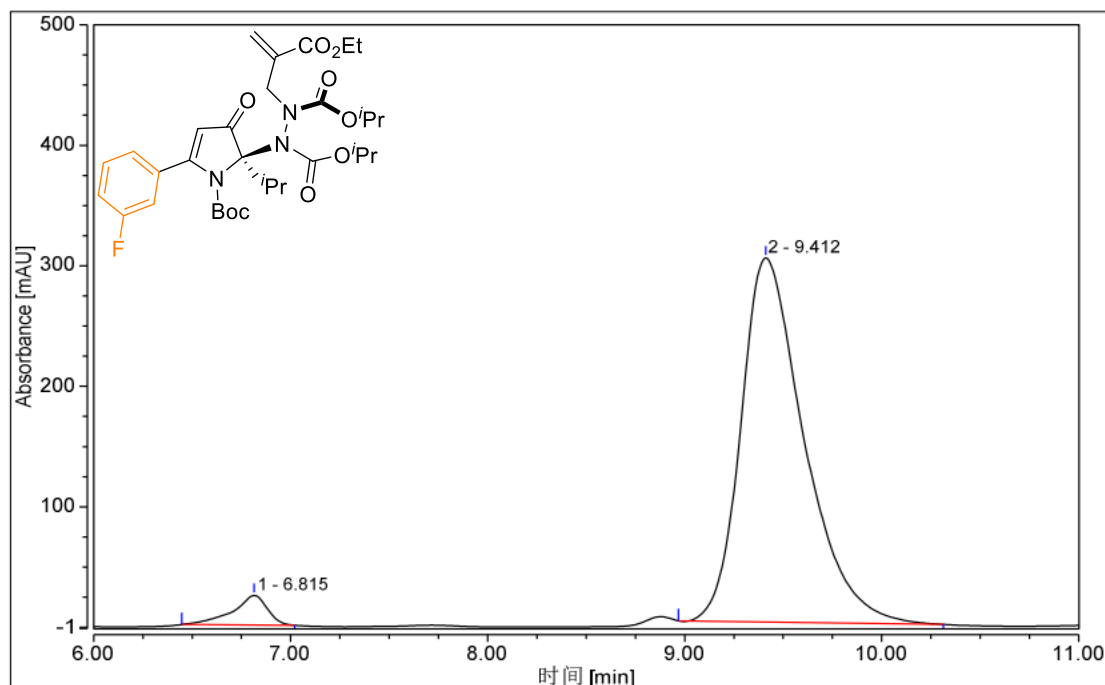

| Peak | RT min | Aera mAU*min | Height mAU | Area % | Height % |
|------|--------|--------------|------------|--------|----------|
| 1    | 6.815  | 5.017        | 24.524     | 4.28   | 7.51     |
| 2    | 9.412  | 112.084      | 302.153    | 95.72  | 92.49    |

**diisopropyl (R,R)-1-(1-(tert-butoxycarbonyl)-5-(3-chlorophenyl)-2-isopropyl-3-oxo-2,3-dihydro-1H-pyrrol-2-yl)-2-(2-(ethoxycarbonyl)allyl)hydrazine-1,2-dicarboxylate (6d)**

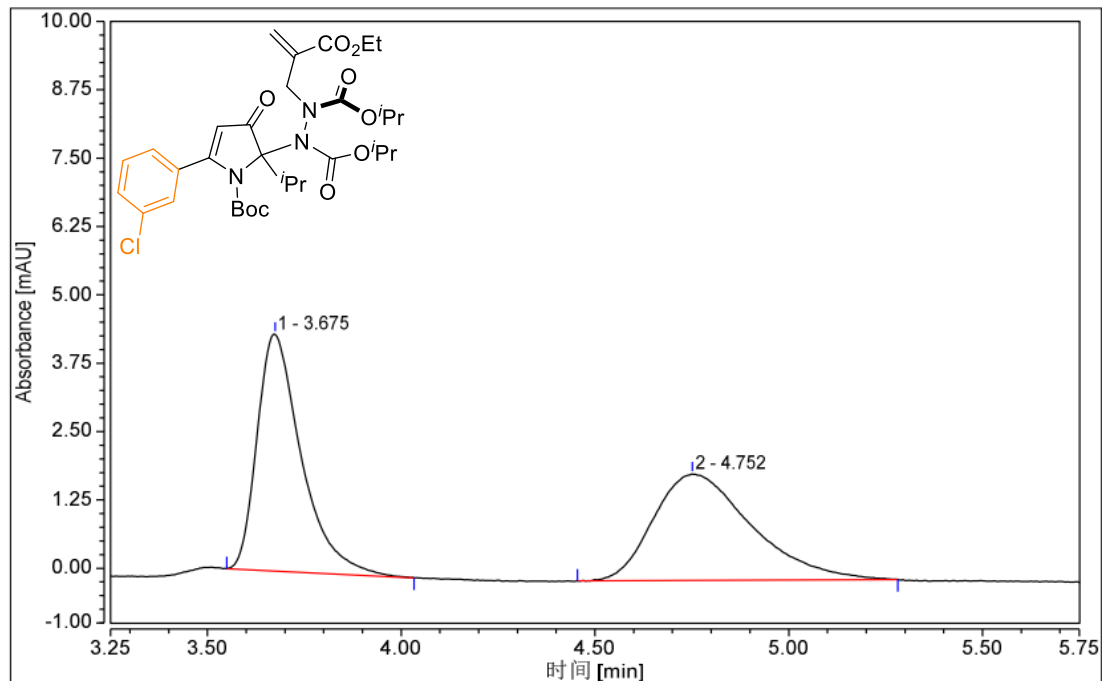

| Peak | RT min | Aera mAU*min | Height mAU | Area % | Height % |
|------|--------|--------------|------------|--------|----------|
| 1    | 3.675  | 0.573        | 4.330      | 50.06  | 68.99    |
| 2    | 4.752  | 0.571        | 1.947      | 49.94  | 31.01    |

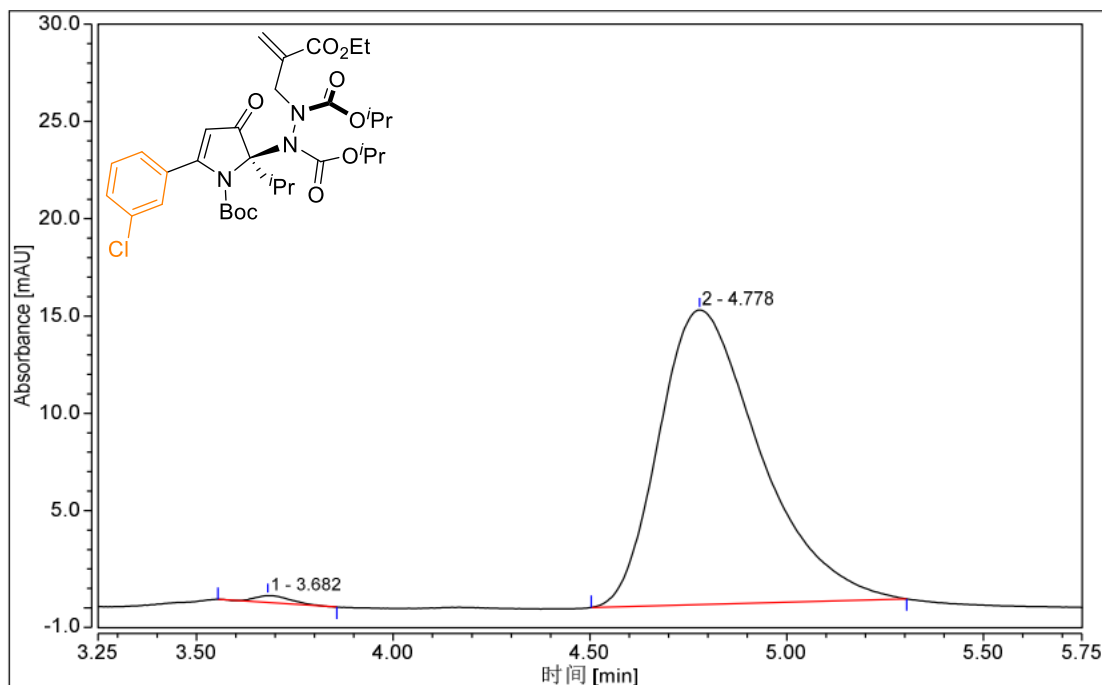

| Peak | RT min | Aera mAU*min | Height mAU | Area % | Height % |
|------|--------|--------------|------------|--------|----------|
| 1    | 3.682  | 0.039        | 0.360      | 0.85   | 2.32     |
| 2    | 4.778  | 4.503        | 15.140     | 99.15  | 97.68    |

**diisopropyl (R,R)-1-(1-(tert-butoxycarbonyl)-5-(4-ethoxyphenyl)-2-isopropyl-3-oxo-2,3-dihydro-1H-pyrrol-2-yl)-2-(2-(ethoxycarbonyl)allyl)hydrazine-1,2-dicarboxylate (6e)**

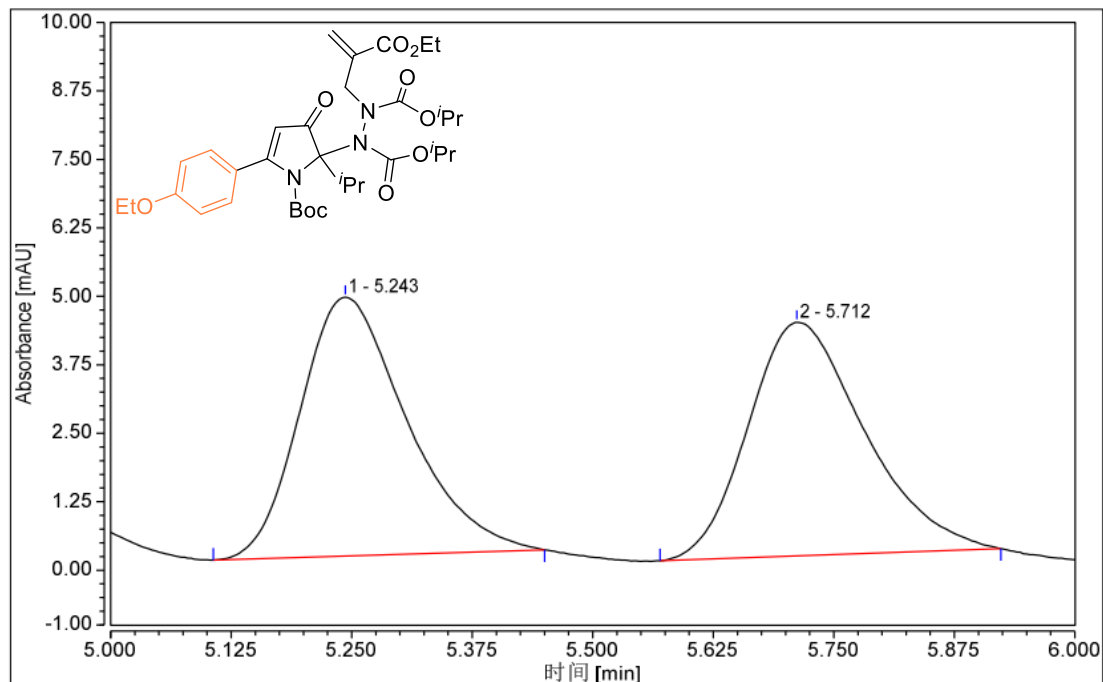

| Peak | RT min | Aera mAU*min | Height mAU | Area % | Height % |
|------|--------|--------------|------------|--------|----------|
| 1    | 5.243  | 0.605        | 4.724      | 50.42  | 52.56    |
| 2    | 5.712  | 0.595        | 4.265      | 49.58  | 47.44    |

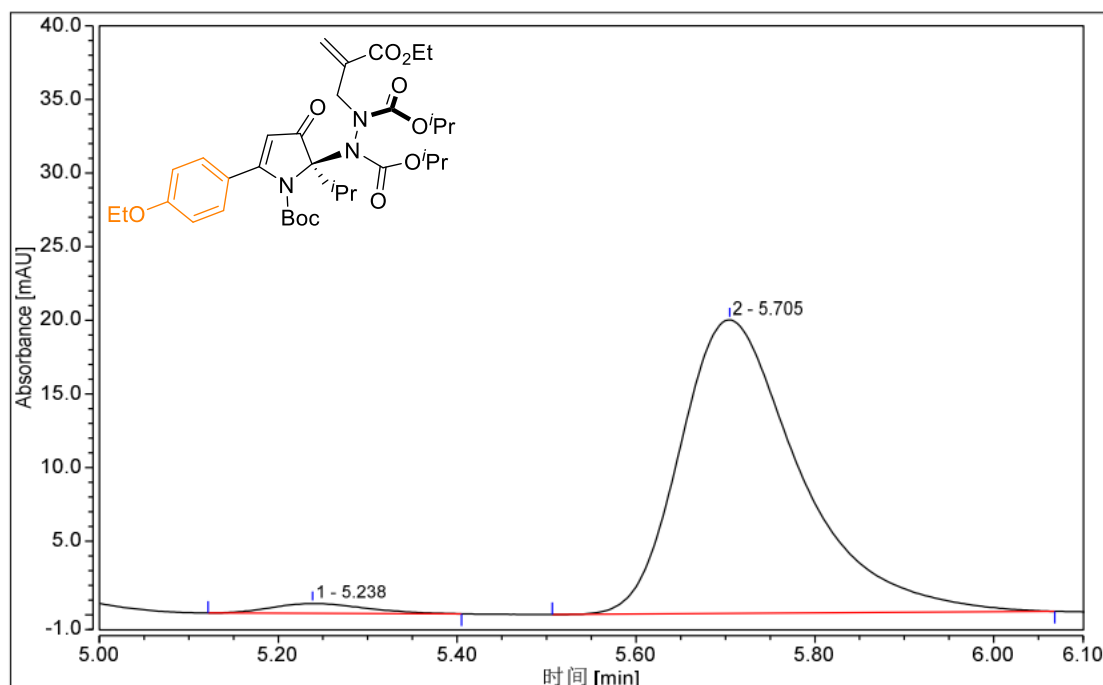

| Peak | RT min | Aera mAU*min | Height mAU | Area % | Height % |
|------|--------|--------------|------------|--------|----------|
| 1    | 5.238  | 0.081        | 0.666      | 2.56   | 3.23     |
| 2    | 5.705  | 3.090        | 19.936     | 97.44  | 96.77    |

diisopropyl (*R,R*)-1-(1-(tert-butoxycarbonyl)-2-isopropyl-3-oxo-5-(*p*-tolyl)-2,3-dihydro-1H-pyrrol-2-yl)-2-(2-(ethoxycarbonyl)allyl)hydrazine-1,2-dicarboxylate (**6f**)

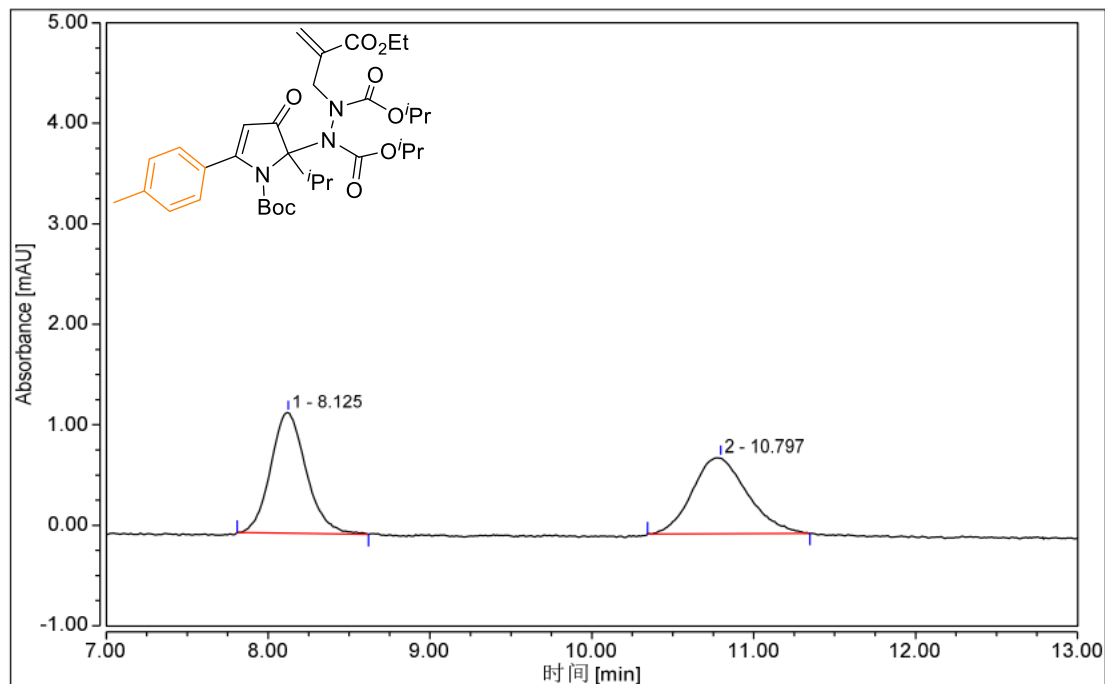

| Peak | RT min | Aera mAU*min | Height mAU | Area % | Height % |
|------|--------|--------------|------------|--------|----------|
| 1    | 8.125  | 0.305        | 1.199      | 50.69  | 61.33    |
| 2    | 10.797 | 0.297        | 0.756      | 49.31  | 38.67    |

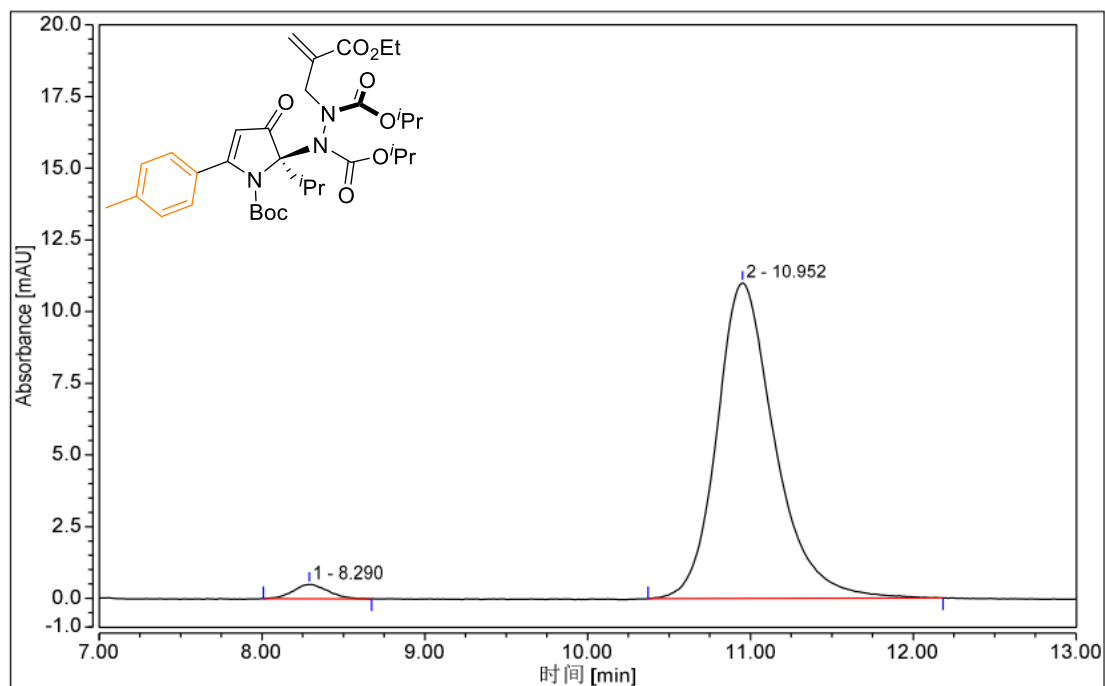

| Peak | RT min | Aera mAU*min | Height mAU | Area % | Height % |
|------|--------|--------------|------------|--------|----------|
| 1    | 8.290  | 0.122        | 0.503      | 2.62   | 4.37     |
| 2    | 10.952 | 4.533        | 10.994     | 97.38  | 95.63    |

**diisopropyl (R,R)-1-(1-(tert-butoxycarbonyl)-5-(4-ethylphenyl)-2-isopropyl-3-oxo-2,3-dihydro-1H-pyrrol-2-yl)-2-(2-(ethoxycarbonyl)allyl)hydrazine-1,2-dicarboxylate (6g)**

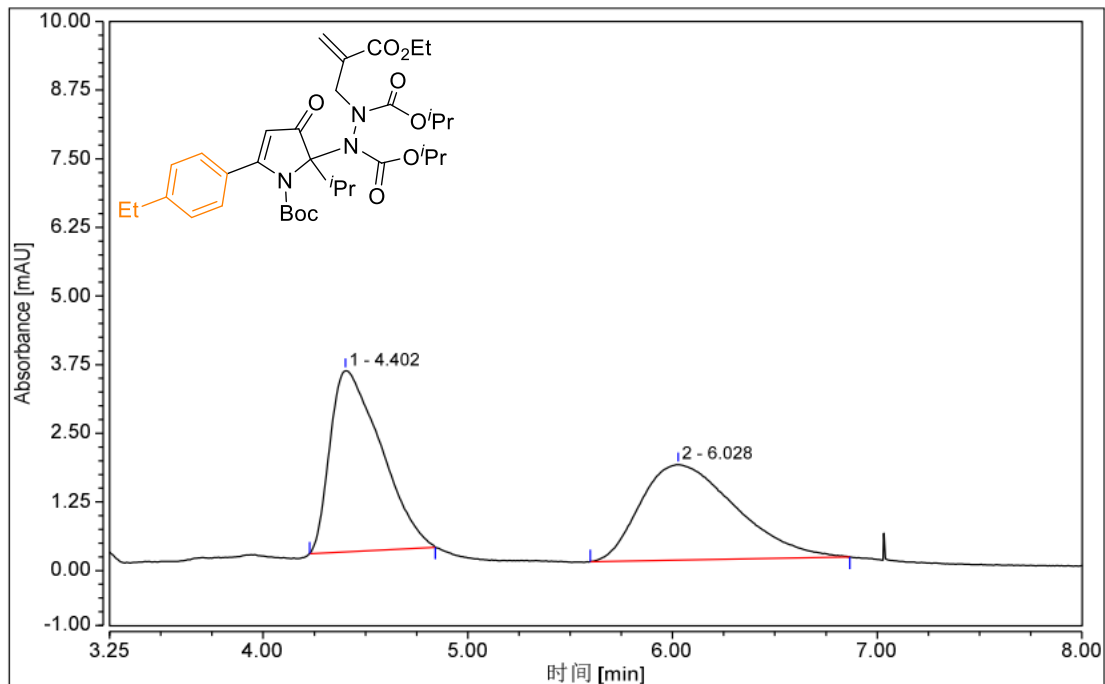

| Peak | RT min | Aera mAU*min | Height mAU | Area % | Height % |
|------|--------|--------------|------------|--------|----------|
| 1    | 4.402  | 0.951        | 3.304      | 50.22  | 65.52    |
| 2    | 6.028  | 0.943        | 1.739      | 49.78  | 34.48    |

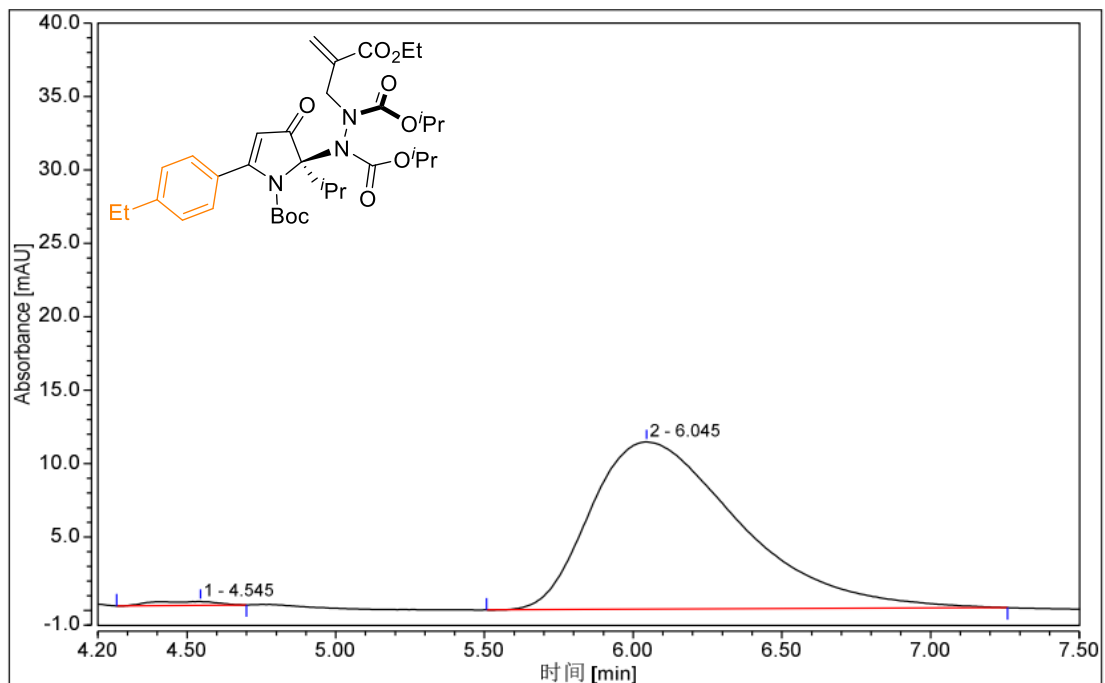

| Peak | RT min | Aera mAU*min | Height mAU | Area % | Height % |
|------|--------|--------------|------------|--------|----------|
| 1    | 4.545  | 0.068        | 0.256      | 1.02   | 2.19     |
| 2    | 6.045  | 6.614        | 11.397     | 98.98  | 97.81    |

**diisopropyl (R, R)-1-(1-(tert-butoxycarbonyl)-2-isopropyl-3-oxo-5-(4-propylphenyl)-2,3-dihydro-1H-pyrrol-2-yl)-2-(2-(ethoxycarbonyl)allyl)hydrazine-1,2-dicarboxylate (6h)**

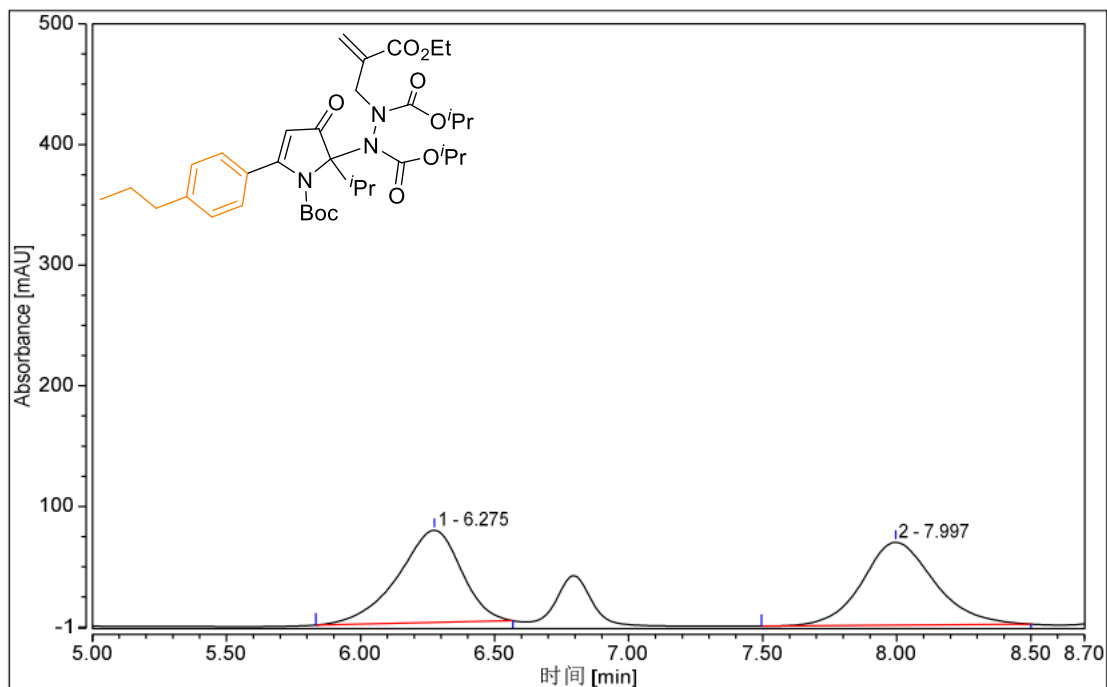

| Peak | RT min | Aera mAU*min | Height mAU | Area % | Height % |
|------|--------|--------------|------------|--------|----------|
| 1    | 6.275  | 21.007       | 76.397     | 49.49  | 52.66    |
| 2    | 7.997  | 21.437       | 68.670     | 50.51  | 47.34    |

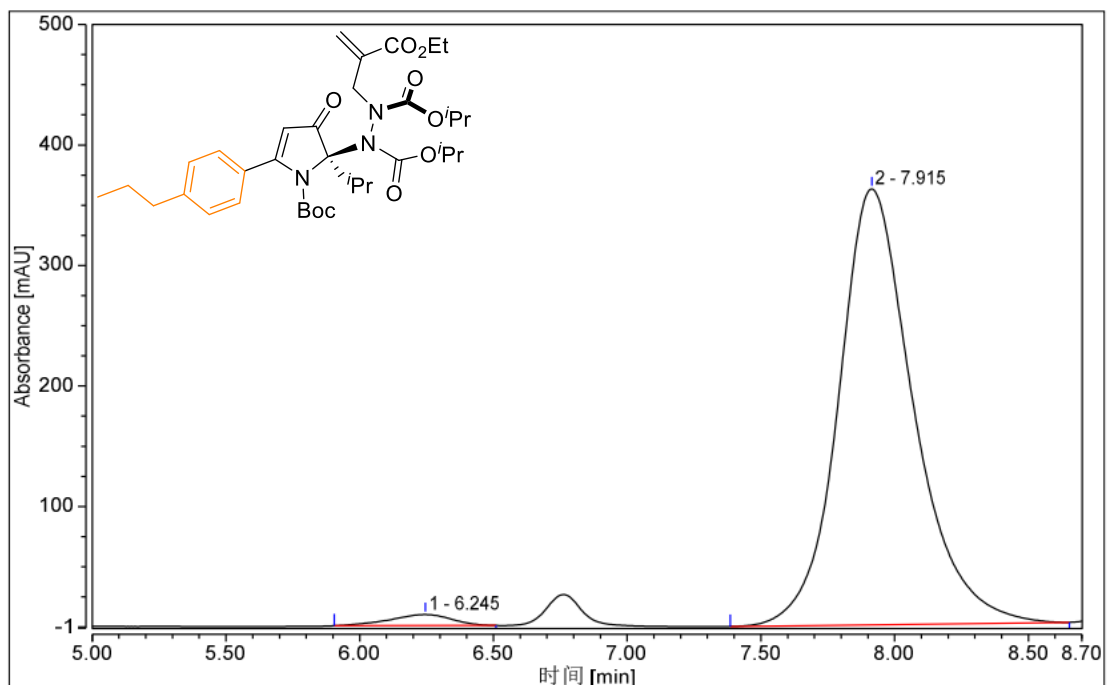

| Peak | RT min | Aera mAU*min | Height mAU | Area % | Height % |
|------|--------|--------------|------------|--------|----------|
| 1    | 6.245  | 2.441        | 9.119      | 2.04   | 2.46     |
| 2    | 7.915  | 117.012      | 361.694    | 97.96  | 97.54    |

**diisopropyl (R,R)-1-(1-(tert-butoxycarbonyl)-5-(4-butylphenyl)-2-isopropyl-3-oxo-2,3-dihydro-1H-pyrrol-2-yl)-2-(2-(ethoxycarbonyl)allyl)hydrazine-1,2-dicarboxylate (6i)**

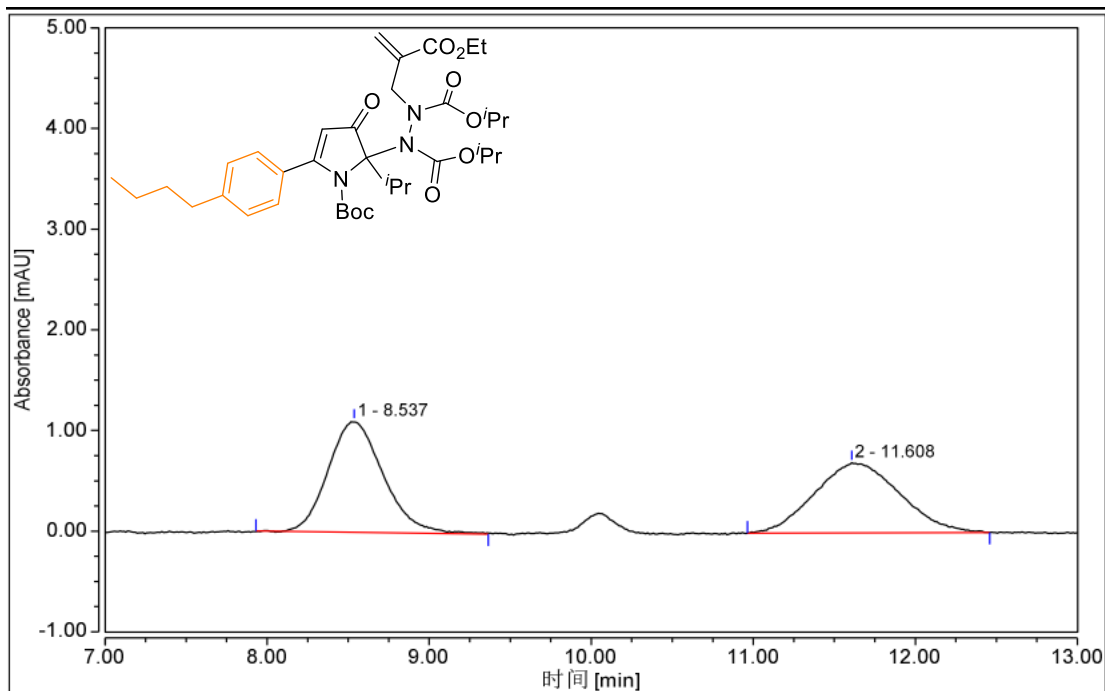

| Peak | RT min | Aera mAU*min | Height mAU | Area % | Height % |
|------|--------|--------------|------------|--------|----------|
| 1    | 8.537  | 0.433        | 1.102      | 50.56  | 61.26    |
| 2    | 11.608 | 0.423        | 0.697      | 49.44  | 38.74    |

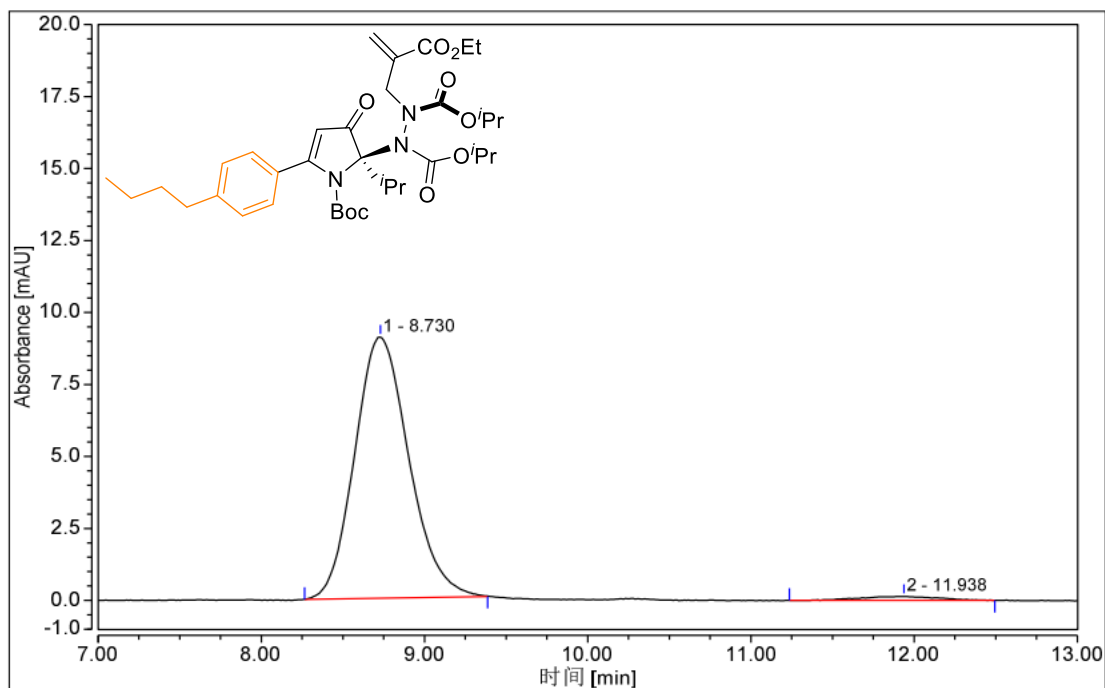

| Peak | RT min | Aera mAU*min | Height mAU | Area % | Height % |
|------|--------|--------------|------------|--------|----------|
| 1    | 8.730  | 3.494        | 9.071      | 97.86  | 98.47    |
| 2    | 11.938 | 0.077        | 0.141      | 2.14   | 1.53     |



**diisopropyl (R,R)-1-(1-(tert-butoxycarbonyl)-5-(4-(tert-butyl)phenyl)-2-isopropyl-3-oxo-2,3-dihydro-1H-pyrrol-2-yl)-2-(2-(ethoxycarbonyl)allyl)hydrazine-1,2-dicarboxylate (6j)**

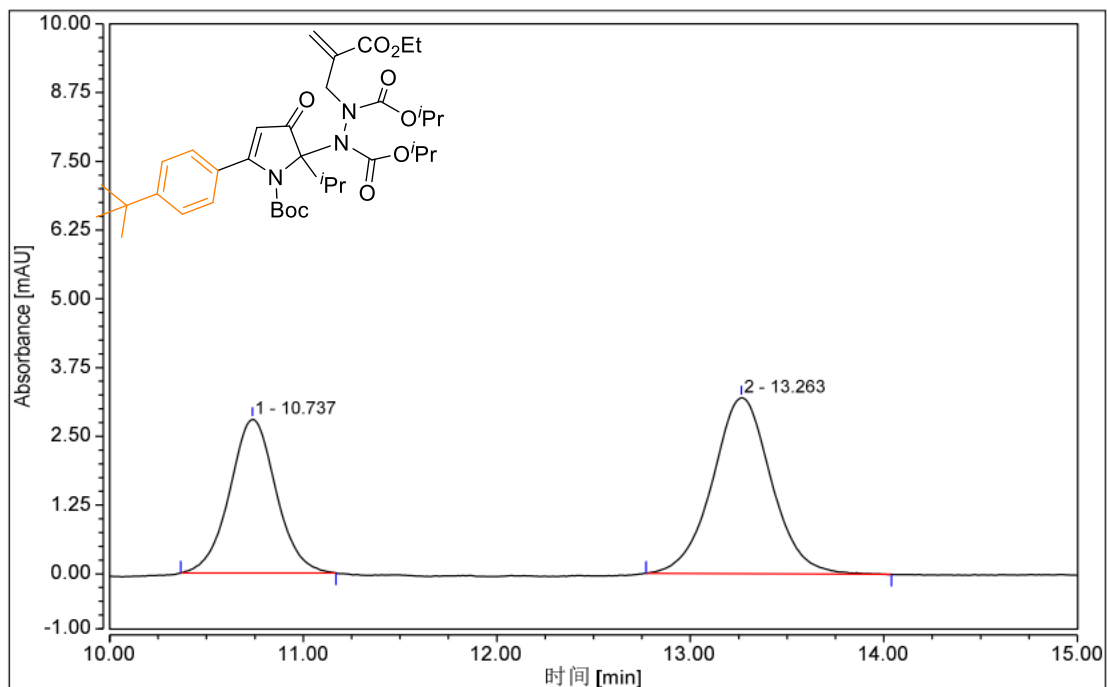

| Peak | RT min | Aera mAU*min | Height mAU | Area % | Height % |
|------|--------|--------------|------------|--------|----------|
| 1    | 10.737 | 0.776        | 2.797      | 40.77  | 46.63    |
| 2    | 13.263 | 1.128        | 3.200      | 59.23  | 53.37    |

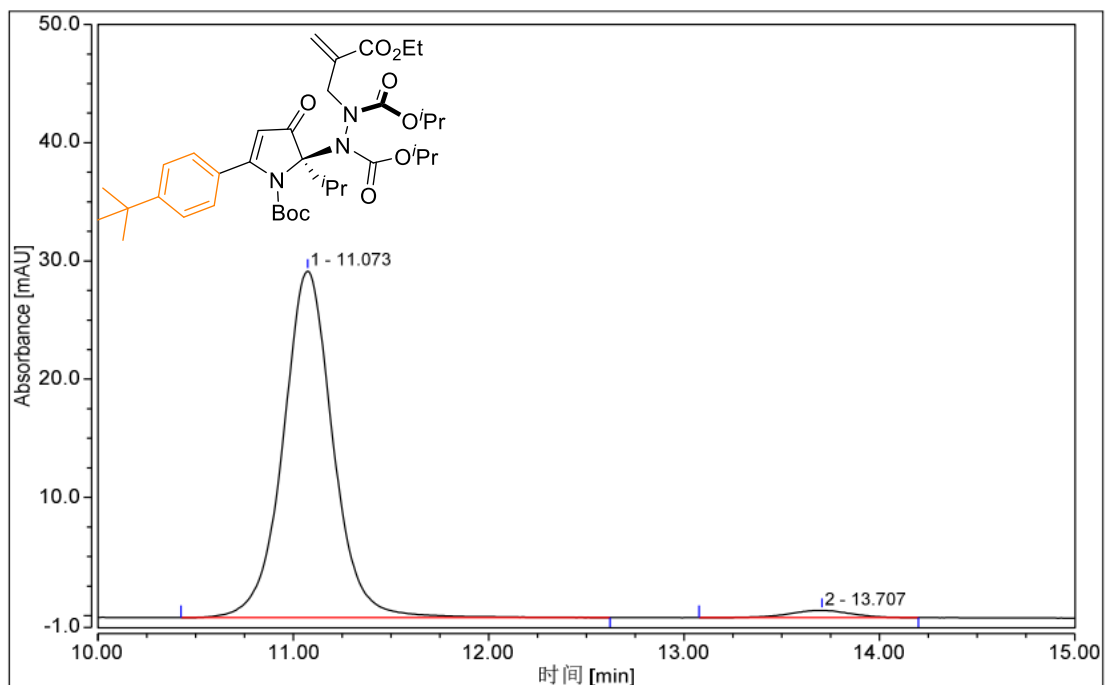

| Peak | RT min | Aera mAU*min | Height mAU | Area % | Height % |
|------|--------|--------------|------------|--------|----------|
| 1    | 11.073 | 8.672        | 29.312     | 97.45  | 97.93    |
| 2    | 13.707 | 0.227        | 0.619      | 2.55   | 2.07     |

**diisopropyl (R, R)-1-(5-([1,1'-biphenyl]-4-yl)-1-(tert-butoxycarbonyl)-2-isopropyl-3-oxo-2,3-dihydro-1H-pyrrol-2-yl)-2-(2-(ethoxycarbonyl)allyl)hydrazine-1,2-dicarboxylate (6k)**

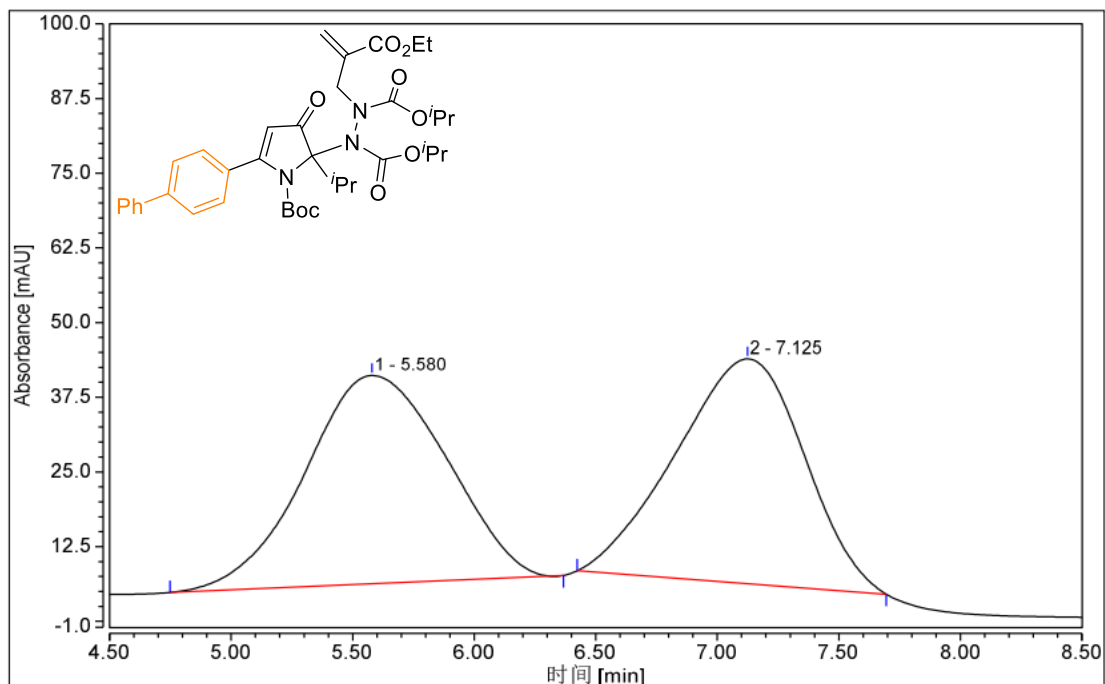

| Peak | RT min | Aera mAU*min | Height mAU | Area % | Height % |
|------|--------|--------------|------------|--------|----------|
| 1    | 5.580  | 23.357       | 34.851     | 50.35  | 48.07    |
| 2    | 7.125  | 23.032       | 37.645     | 49.65  | 51.93    |

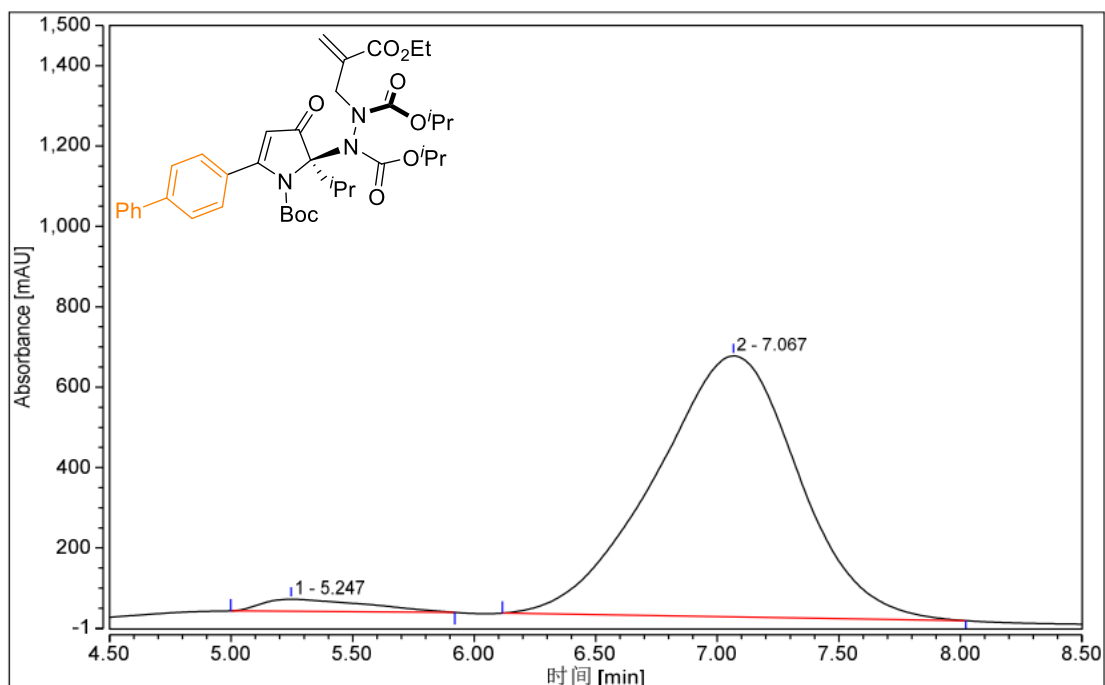

| Peak | RT min | Aera mAU*min | Height mAU | Area % | Height % |
|------|--------|--------------|------------|--------|----------|
| 1    | 5.247  | 15.005       | 29.887     | 3.26   | 4.40     |
| 2    | 7.067  | 444.681      | 649.462    | 96.74  | 95.60    |

**diisopropyl (R,R)-1-(1-(tert-butoxycarbonyl)-5-(4-fluorophenyl)-2-isopropyl-3-oxo-2,3-dihydro-1H-pyrrol-2-yl)-2-(2-(ethoxycarbonyl)allyl)hydrazine-1,2-dicarboxylate (6l)**

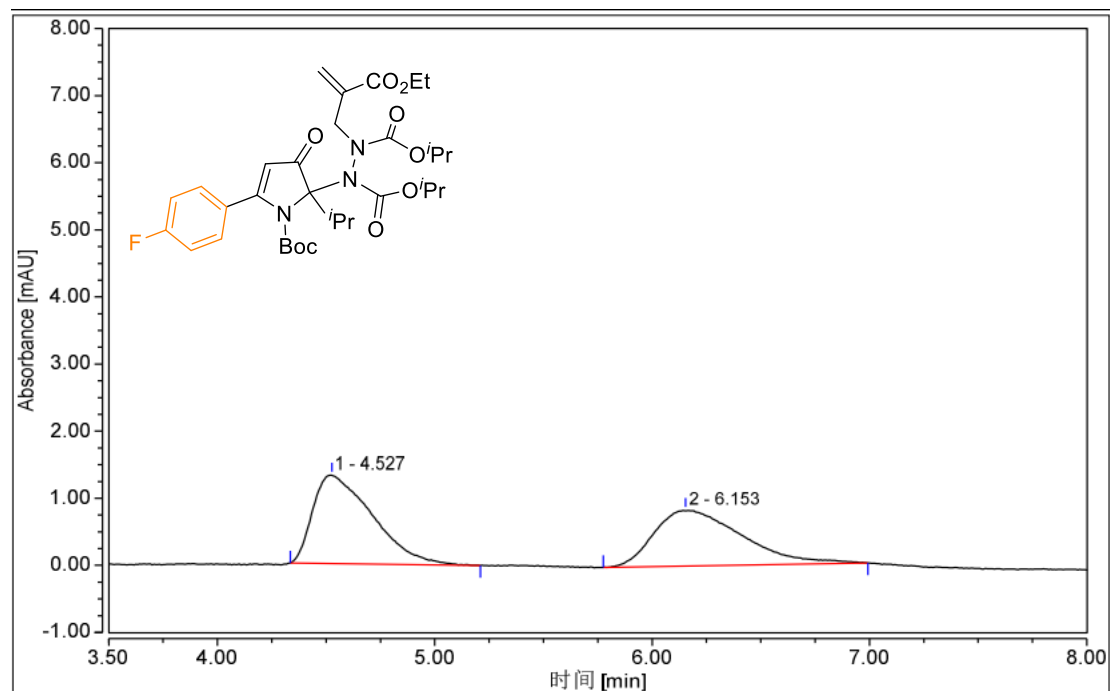

| Peak | RT min | Aera mAU*min | Height mAU | Area % | Height % |
|------|--------|--------------|------------|--------|----------|
| 1    | 4.527  | 0.417        | 1.321      | 51.75  | 61.31    |
| 2    | 6.153  | 0.389        | 0.833      | 48.25  | 38.69    |

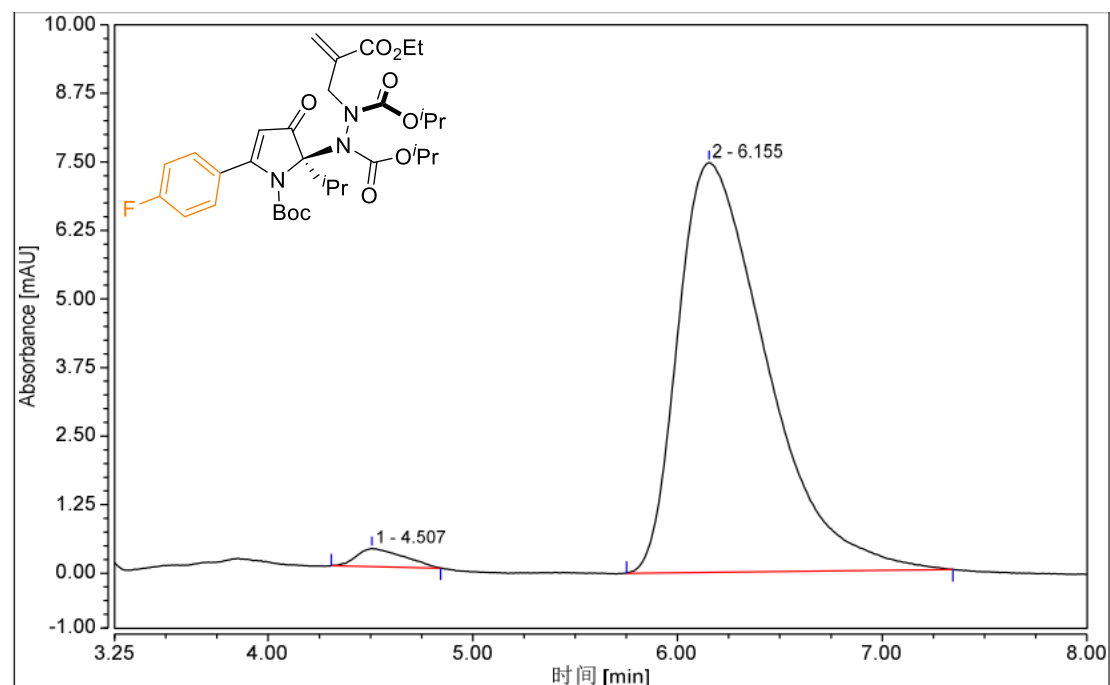

| Peak | RT min | Aera mAU*min | Height mAU | Area % | Height % |
|------|--------|--------------|------------|--------|----------|
| 1    | 4.507  | 0.087        | 0.330      | 2.28   | 4.23     |
| 2    | 6.155  | 3.744        | 7.470      | 97.72  | 95.77    |

diisopropyl (*R,R*)-1-(1-(tert-butoxycarbonyl)-2-isopropyl-3-oxo-5-(4-(trifluoromethyl)phenyl)-2,3-dihydro-1H-pyrrol-2-yl)-2-(2-(ethoxycarbonyl)allyl)hydrazine-1,2-dicarboxylate (6m)

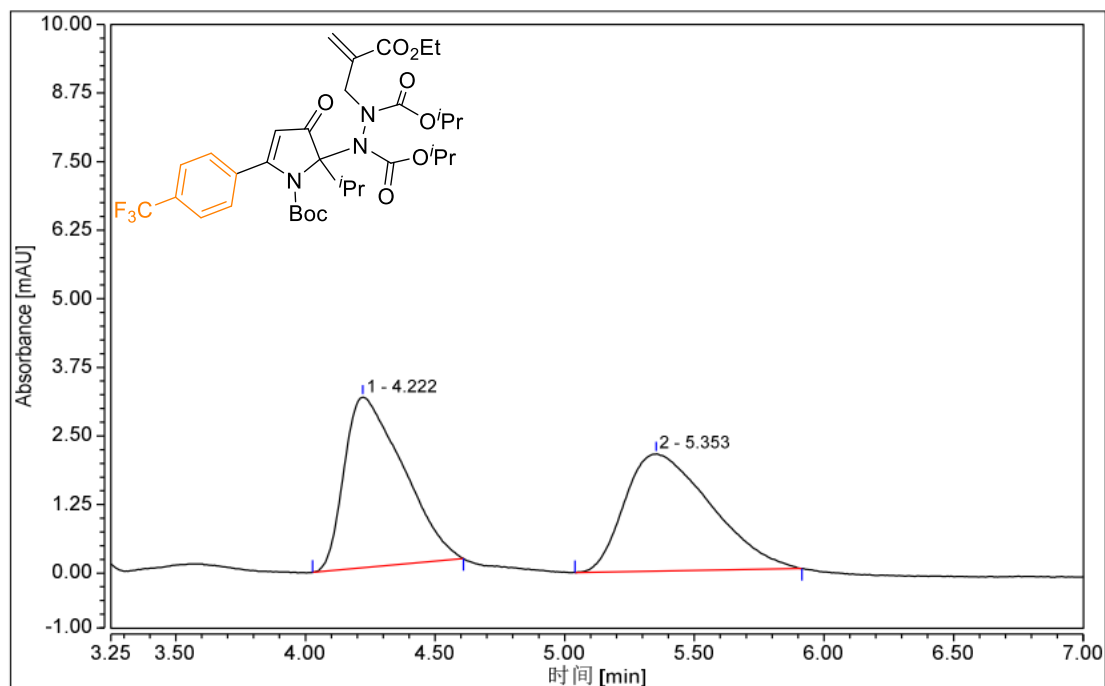

| Peak | RT min | Aera mAU*min | Height mAU | Area % | Height % |
|------|--------|--------------|------------|--------|----------|
| 1    | 4.222  | 0.815        | 3.112      | 49.84  | 59.29    |
| 2    | 5.353  | 0.821        | 2.136      | 50.16  | 40.71    |

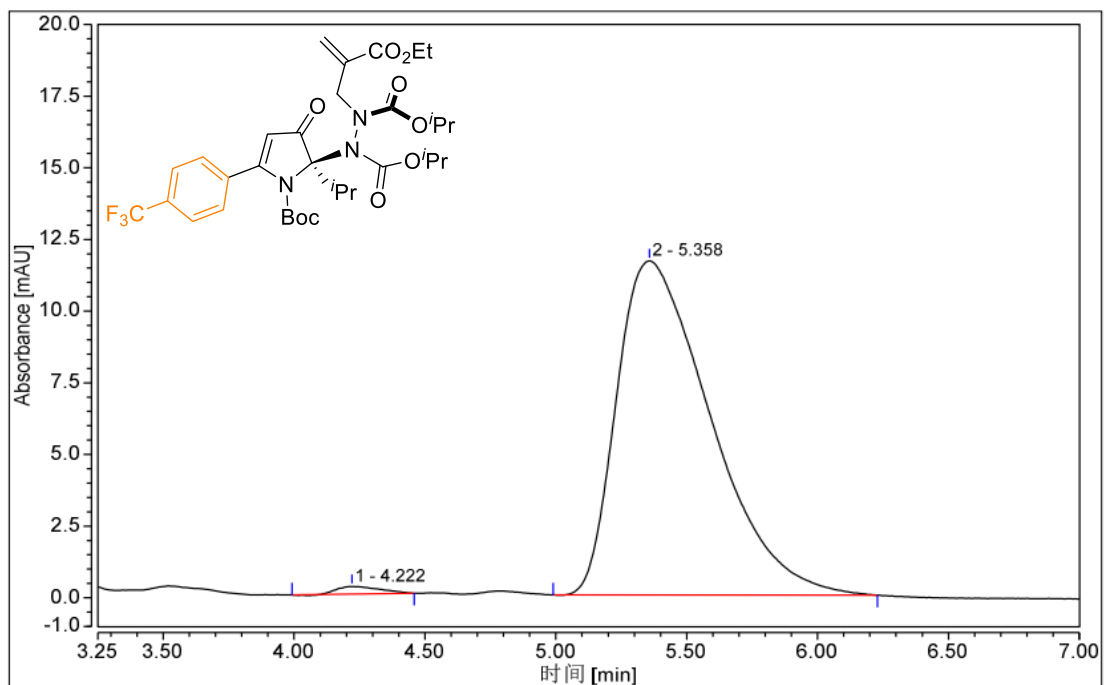

| Peak | RT min | Aera mAU*min | Height mAU | Area % | Height % |
|------|--------|--------------|------------|--------|----------|
| 1    | 4.222  | 0.050        | 0.270      | 1.02   | 2.26     |
| 2    | 5.358  | 4.833        | 11.657     | 98.98  | 97.74    |

**diisopropyl (R,R)-1-(1-(tert-butoxycarbonyl)-2-isopropyl-3-oxo-5-phenyl-2,3-dihydro-1H-pyrrol-2-yl)-2-(2-(methoxycarbonyl)allyl)hydrazine-1,2-dicarboxylate (6n)**

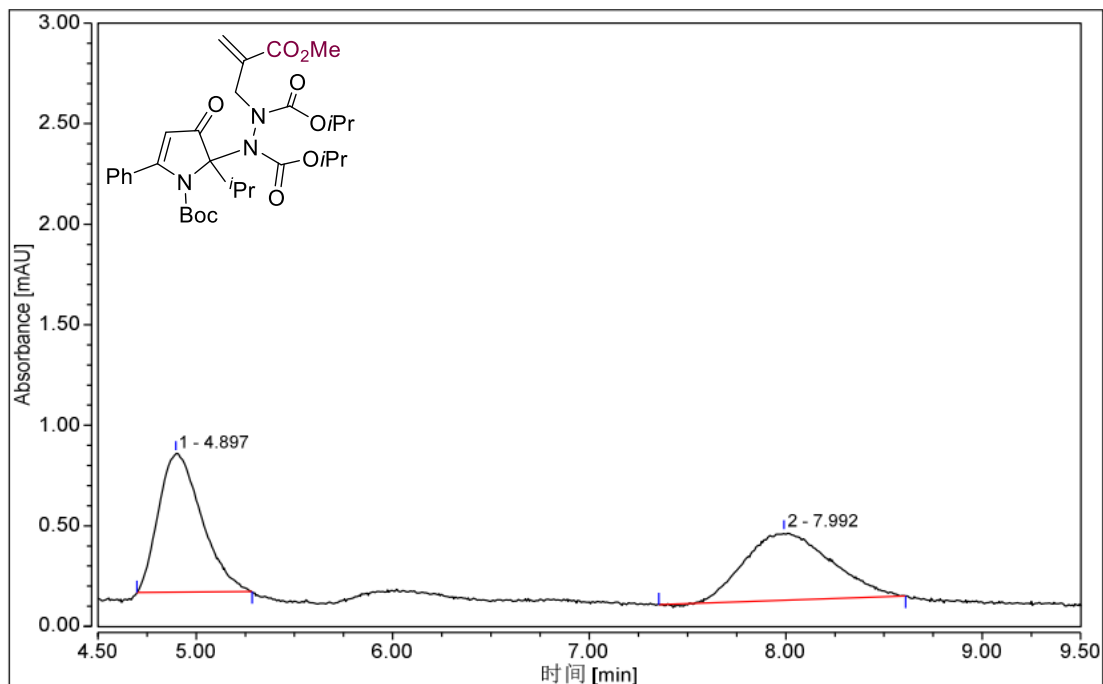

| Peak | RT min | Aera mAU*min | Height mAU | Area % | Height % |
|------|--------|--------------|------------|--------|----------|
| 1    | 4.897  | 0.176        | 0.691      | 50.64  | 67.12    |
| 2    | 7.992  | 0.171        | 0.339      | 49.36  | 32.88    |

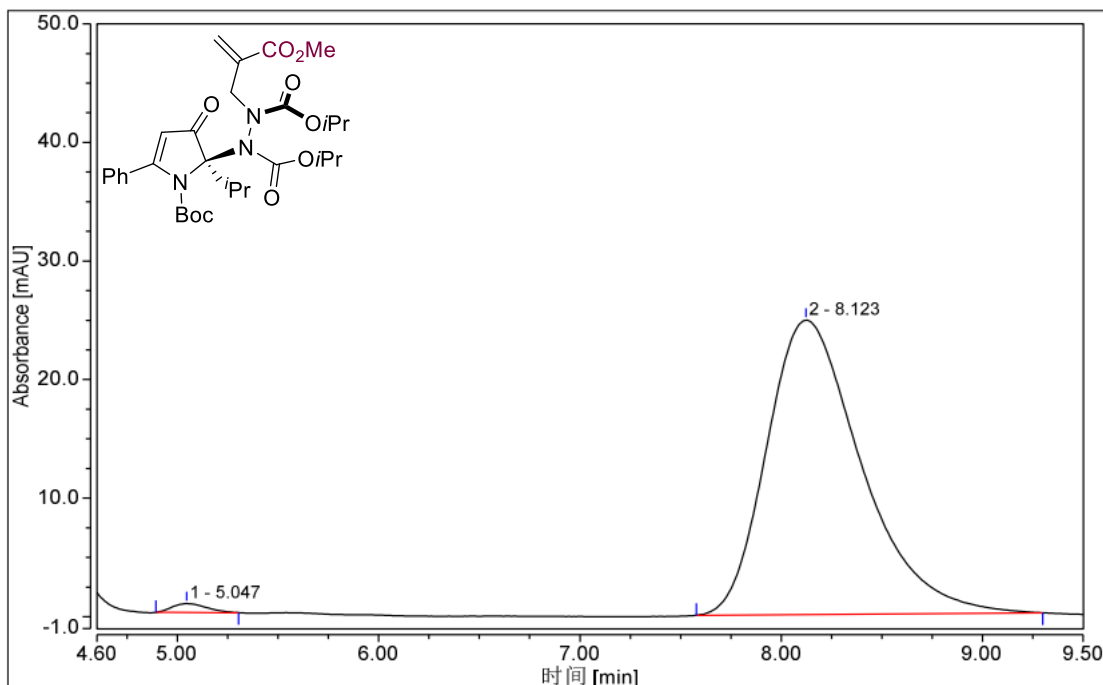

| Peak | RT min | Aera mAU*min | Height mAU | Area % | Height % |
|------|--------|--------------|------------|--------|----------|
| 1    | 5.047  | 0.148        | 0.744      | 1.08   | 2.91     |
| 2    | 8.123  | 13.522       | 24.827     | 98.92  | 97.09    |

**diisopropyl (R, R)-1-(1-(tert-butoxycarbonyl)-2-isopropyl-3-oxo-5-phenyl-2,3-dihydro-1H-pyrrol-2-yl)-2-(2-(isopropoxycarbonyl)allyl)hydrazine-1,2-dicarboxylate (60)**

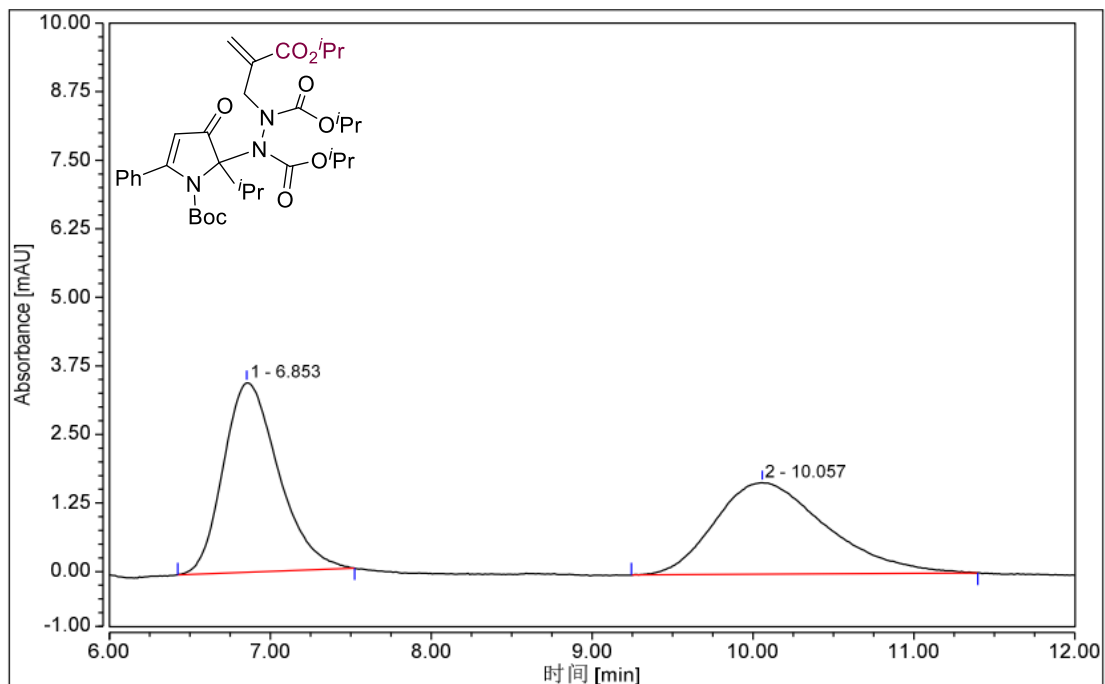

| Peak | RT min | Aera mAU*min | Height mAU | Area % | Height % |
|------|--------|--------------|------------|--------|----------|
| 1    | 6.853  | 1.373        | 3.457      | 50.53  | 67.41    |
| 2    | 10.057 | 1.344        | 1.671      | 49.47  | 32.59    |

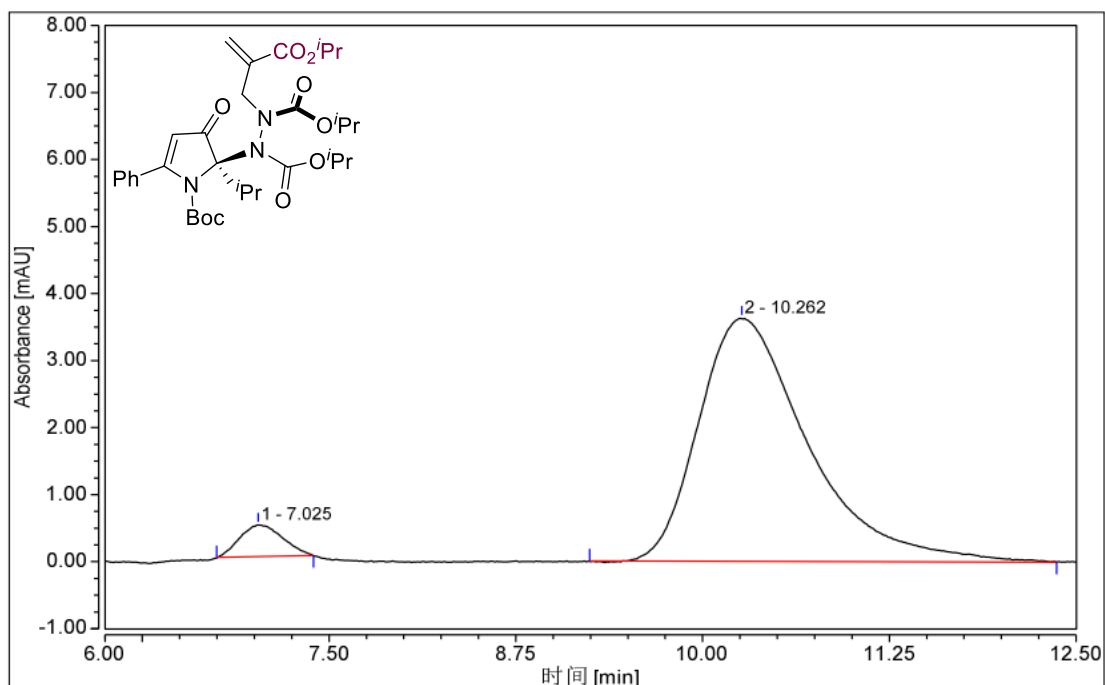

| Peak | RT min | Aera mAU*min | Height mAU | Area % | Height % |
|------|--------|--------------|------------|--------|----------|
| 1    | 7.025  | 0.157        | 0.474      | 4.85   | 11.54    |
| 2    | 10.262 | 3.072        | 3.632      | 95.15  | 88.46    |

diisopropyl (*R,R*)-1-(2-((allyloxy)carbonyl)allyl)-2-(1-(tert-butoxycarbonyl)-2-isopropyl-3-oxo-5-phenyl-2,3-dihydro-1H-pyrrol-2-yl)hydrazine-1,2-dicarboxylate (6p)

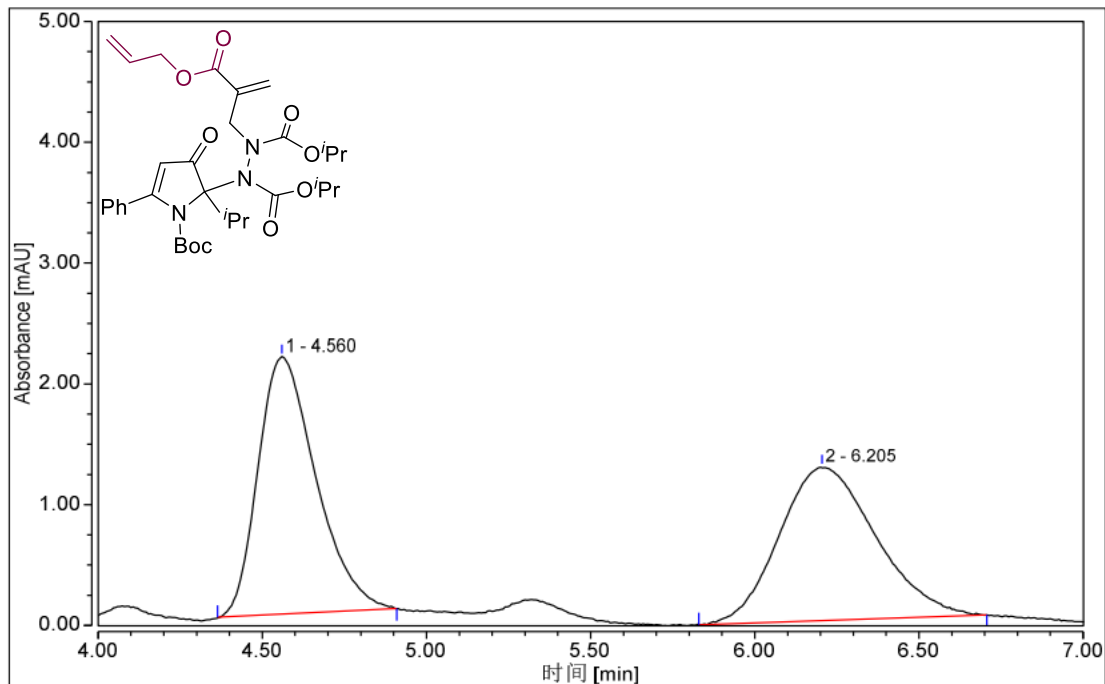

| Peak | RT min | Aera mAU*min | Height mAU | Area % | Height % |
|------|--------|--------------|------------|--------|----------|
| 1    | 4.560  | 0.435        | 2.132      | 50.23  | 62.64    |
| 2    | 6.205  | 0.431        | 1.271      | 49.77  | 37.36    |

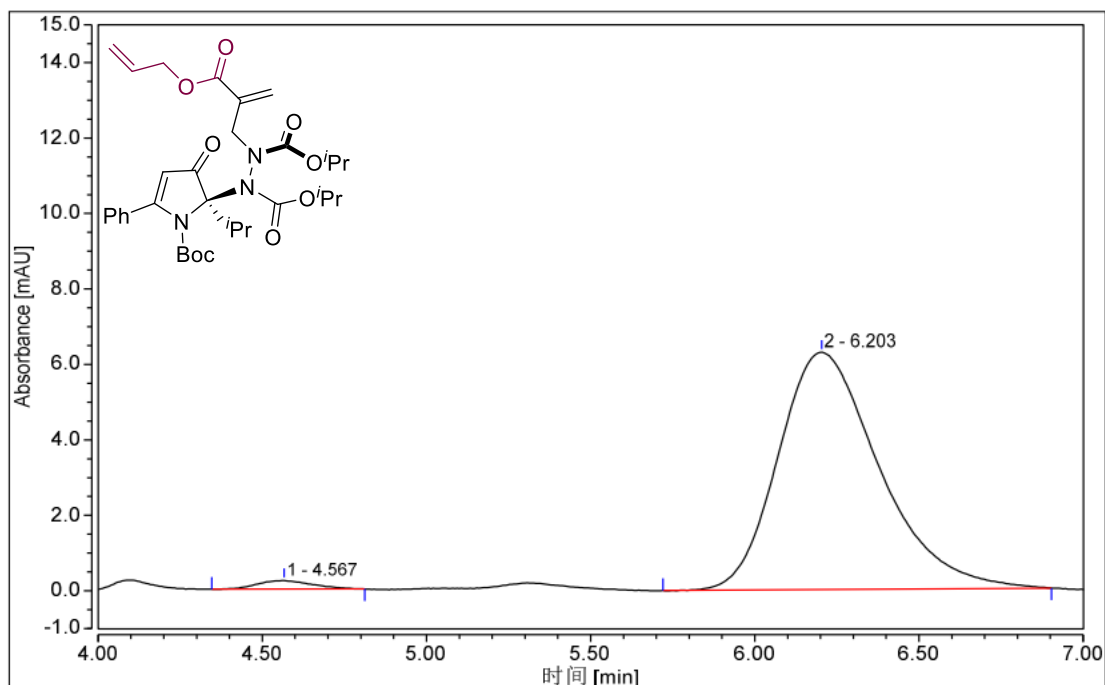

| Peak | RT min | Aera mAU*min | Height mAU | Area % | Height % |
|------|--------|--------------|------------|--------|----------|
| 1    | 4.567  | 0.043        | 0.226      | 1.89   | 3.48     |
| 2    | 6.203  | 2.245        | 6.290      | 98.11  | 96.52    |

**diisopropyl (R, R)-1-(1-(tert-butoxycarbonyl)-2-cyclopentyl-3-oxo-5-phenyl-2,3-dihydro-1H-pyrrol-2-yl)-2-(2-(ethoxycarbonyl)allyl)hydrazine-1,2-dicarboxylate (6q)**

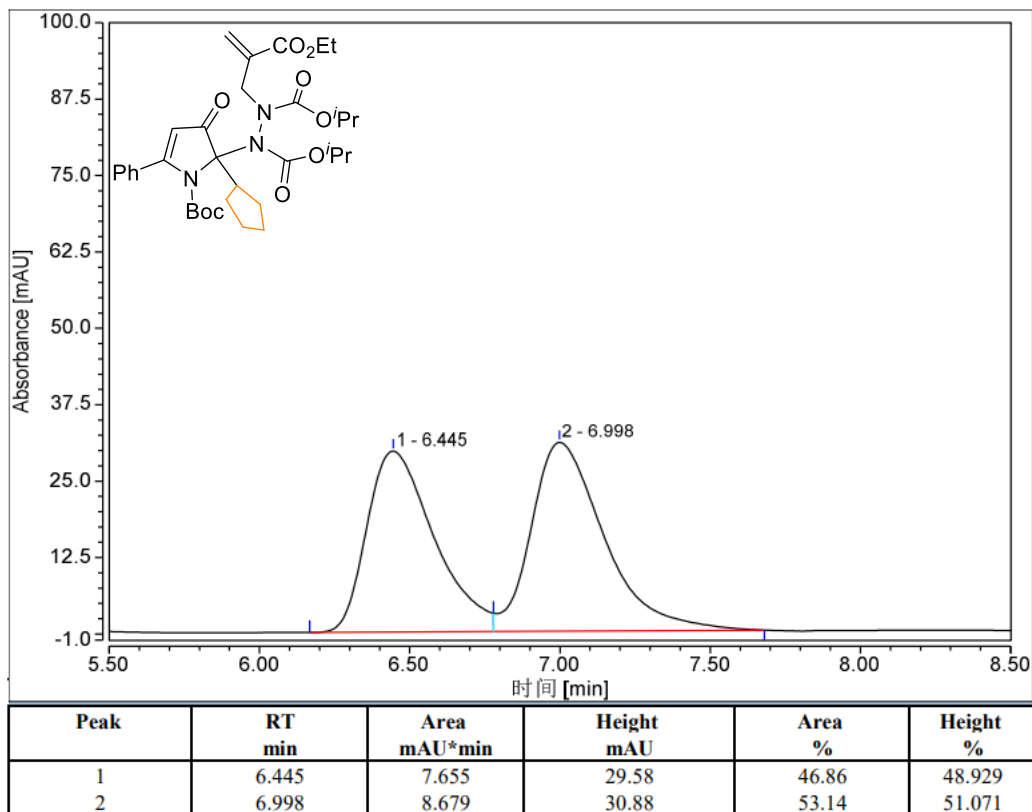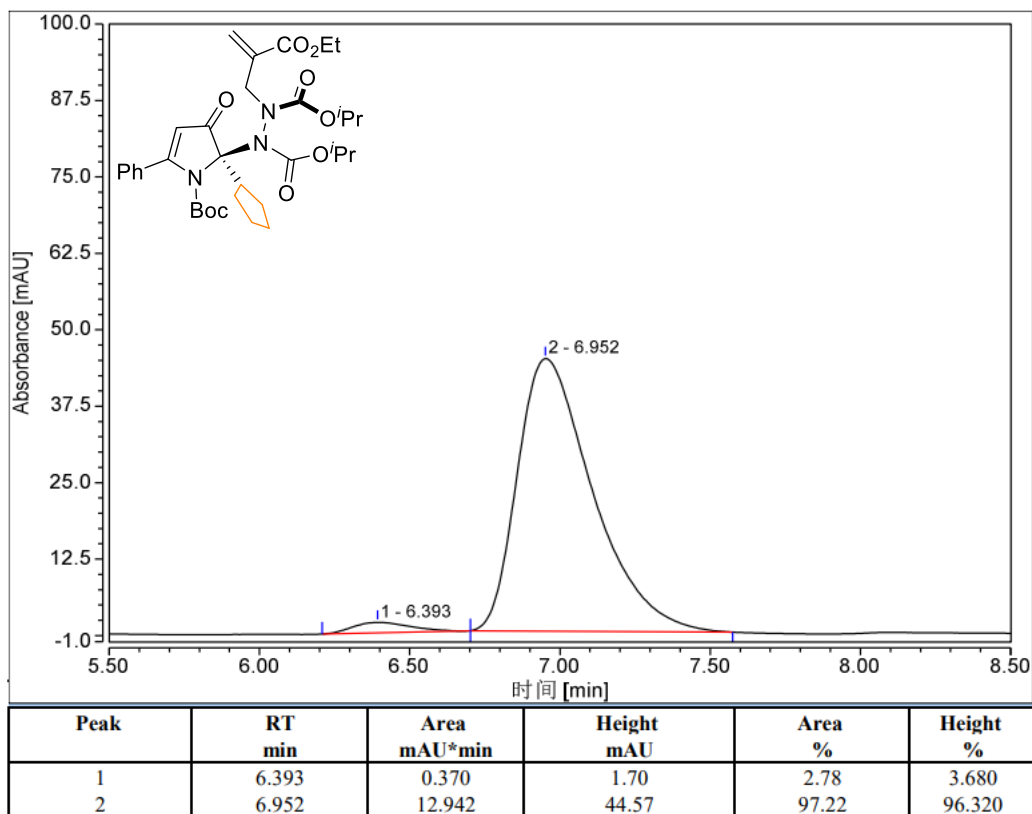



**diisopropyl (R, R)-1-(1-(tert-butoxycarbonyl)-2-cyclohexyl-3-oxo-5-phenyl-2,3-dihydro-1H-pyrrol-2-yl)-2-(2-(ethoxycarbonyl)allyl)hydrazine-1,2-dicarboxylate (6r)**

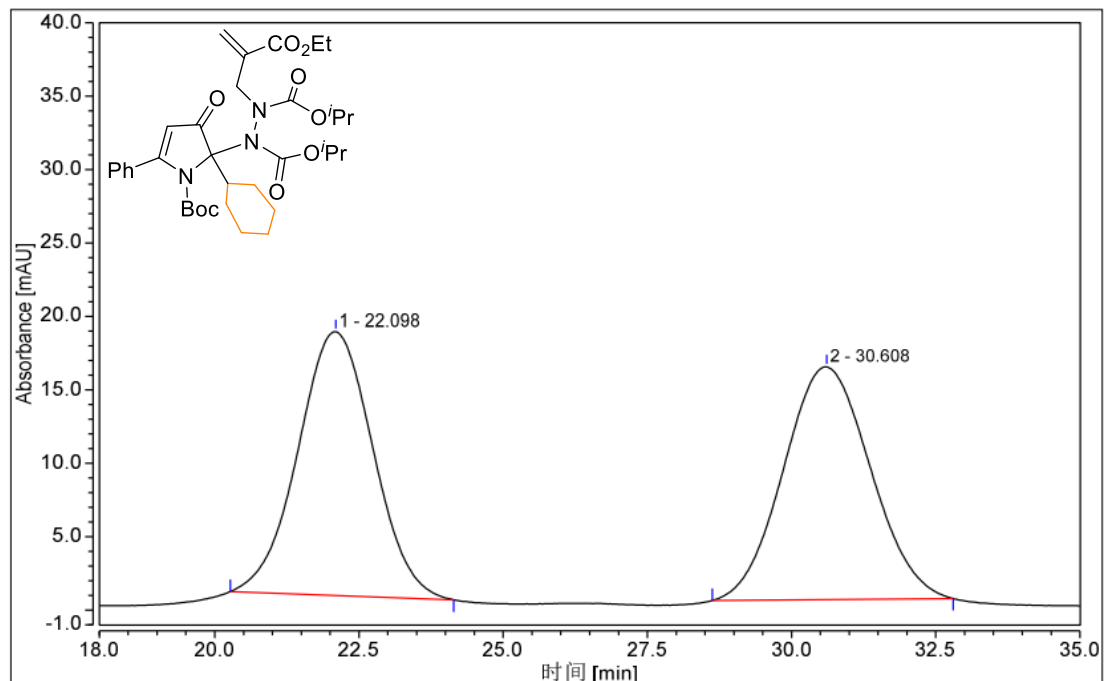

| Peak | RT min | Aera mAU*min | Height mAU | Area % | Height % |
|------|--------|--------------|------------|--------|----------|
| 1    | 22.098 | 27.052       | 17.974     | 49.45  | 53.15    |
| 2    | 30.608 | 27.655       | 15.846     | 50.55  | 46.85    |

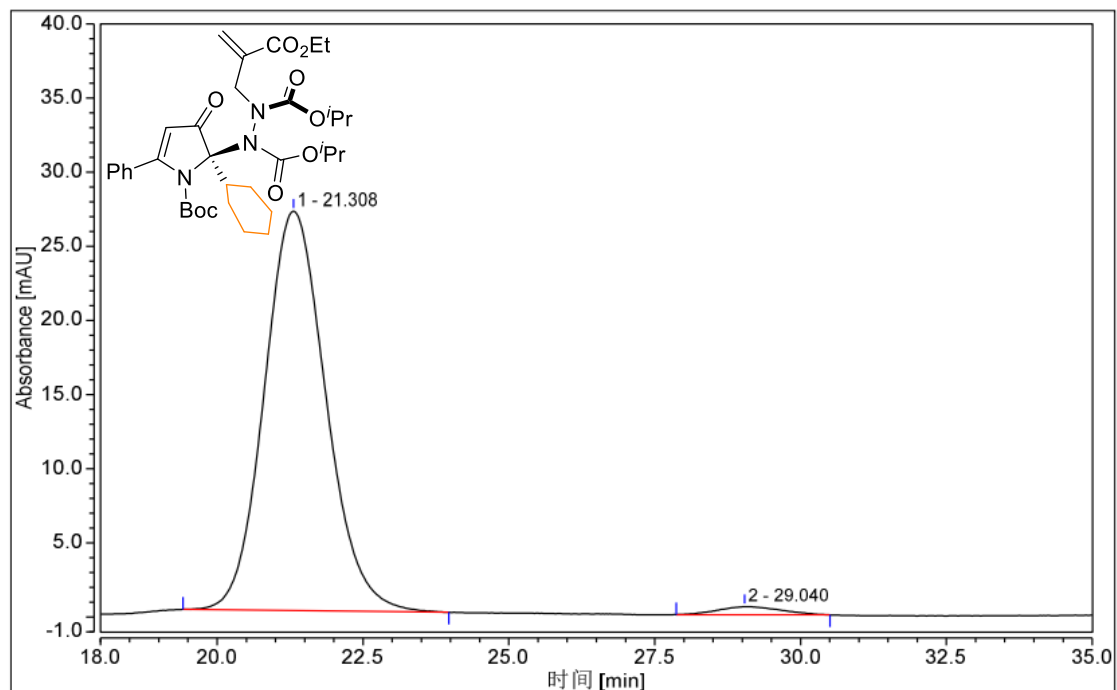

| Peak | RT min | Aera mAU*min | Height mAU | Area % | Height % |
|------|--------|--------------|------------|--------|----------|
| 1    | 21.308 | 32.997       | 26.938     | 97.98  | 98.01    |
| 2    | 29.040 | 0.679        | 0.547      | 2.02   | 1.99     |

diisopropyl (*R, R*)-1-(1-(tert-butoxycarbonyl)-3-oxo-5-phenyl-2-propyl-2,3-dihydro-1H-pyrrol-2-yl)-2-(2-(ethoxycarbonyl)allyl)hydrazine-1,2-dicarboxylate (**6s**)

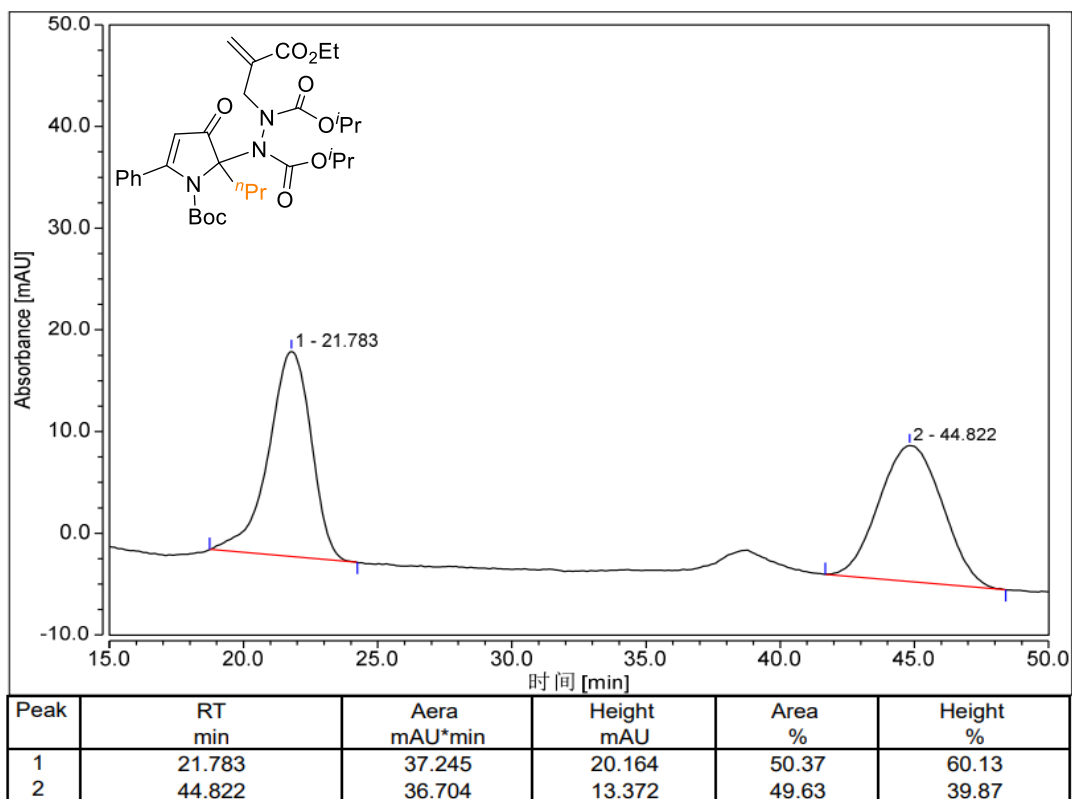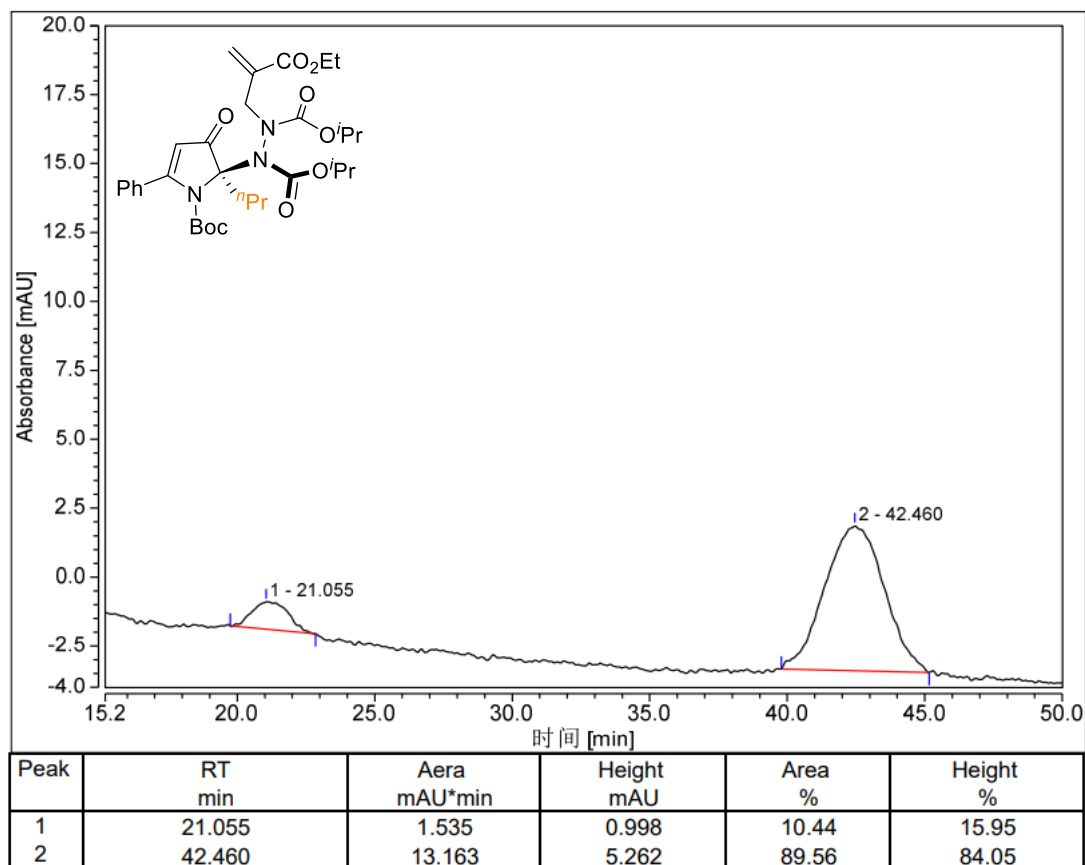

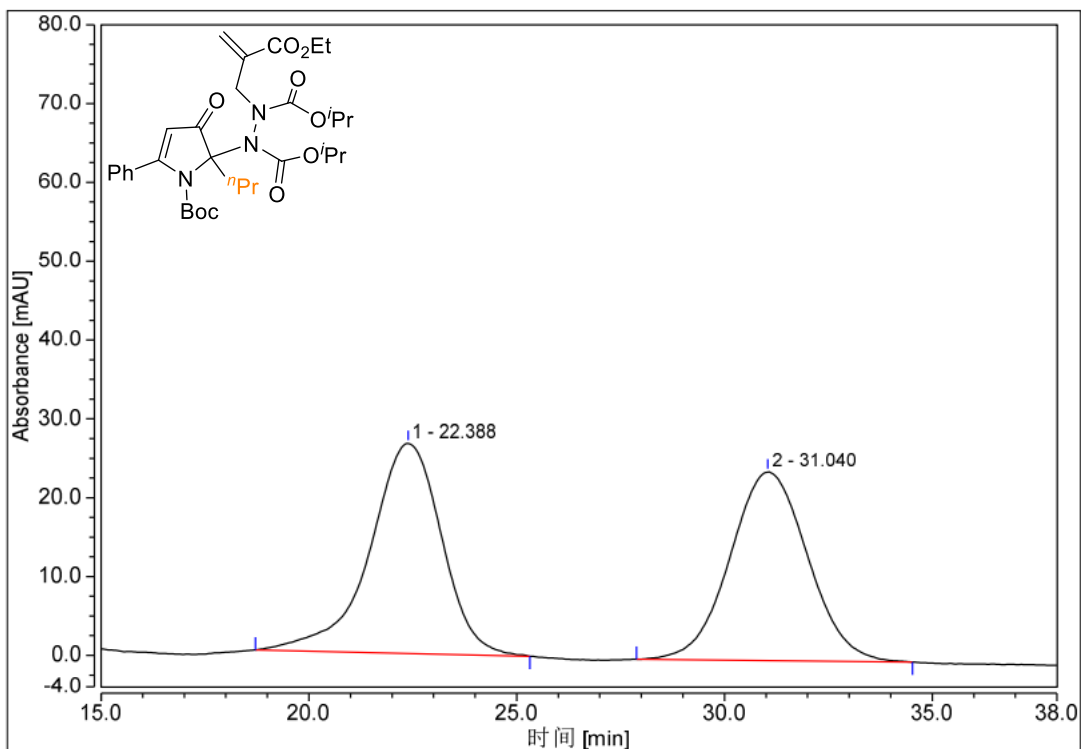

| Peak | RT min | Aera mAU*min | Height mAU | Area % | Height % |
|------|--------|--------------|------------|--------|----------|
| 1    | 22.388 | 53.400       | 26.634     | 50.76  | 52.67    |
| 2    | 31.040 | 51.798       | 23.932     | 49.24  | 47.33    |

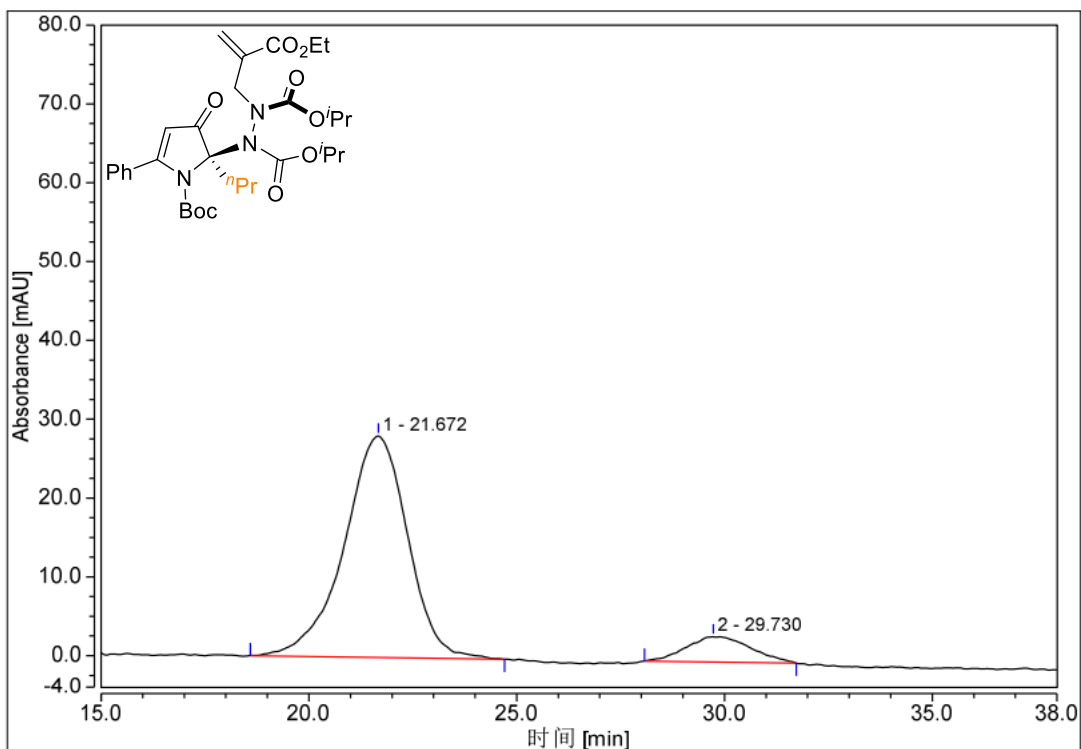

| Peak | RT min | Aera mAU*min | Height mAU | Area % | Height % |
|------|--------|--------------|------------|--------|----------|
| 1    | 21.672 | 49.748       | 28.078     | 89.62  | 89.82    |
| 2    | 29.730 | 5.764        | 3.182      | 10.38  | 10.18    |

**diisopropyl (R, R)-1-(1-(tert-butoxycarbonyl)-2-(4-nitrobenzyl)-3-oxo-5-phenyl-2,3-dihydro-1H-pyrrol-2-yl)-2-(2-(ethoxycarbonyl)allyl)hydrazine-1,2-dicarboxylate (6t)**

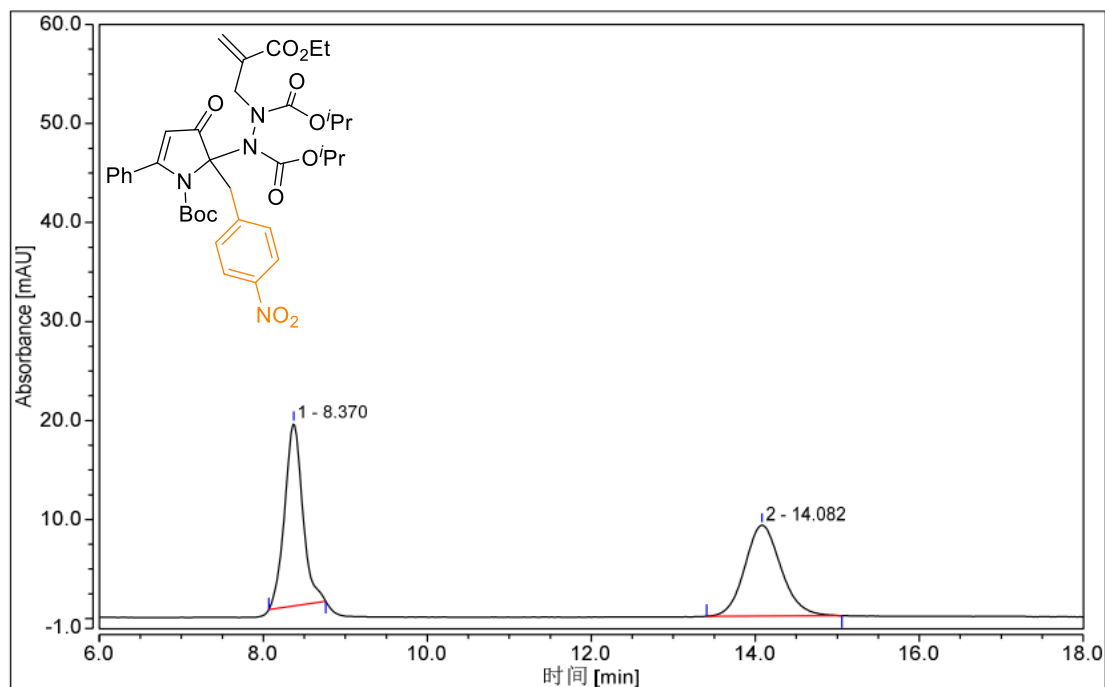

| Peak | RT min | Aera mAU*min | Height mAU | Area % | Height % |
|------|--------|--------------|------------|--------|----------|
| 1    | 8.370  | 4.730        | 18.435     | 50.23  | 66.78    |
| 2    | 14.082 | 4.688        | 9.170      | 49.77  | 33.22    |

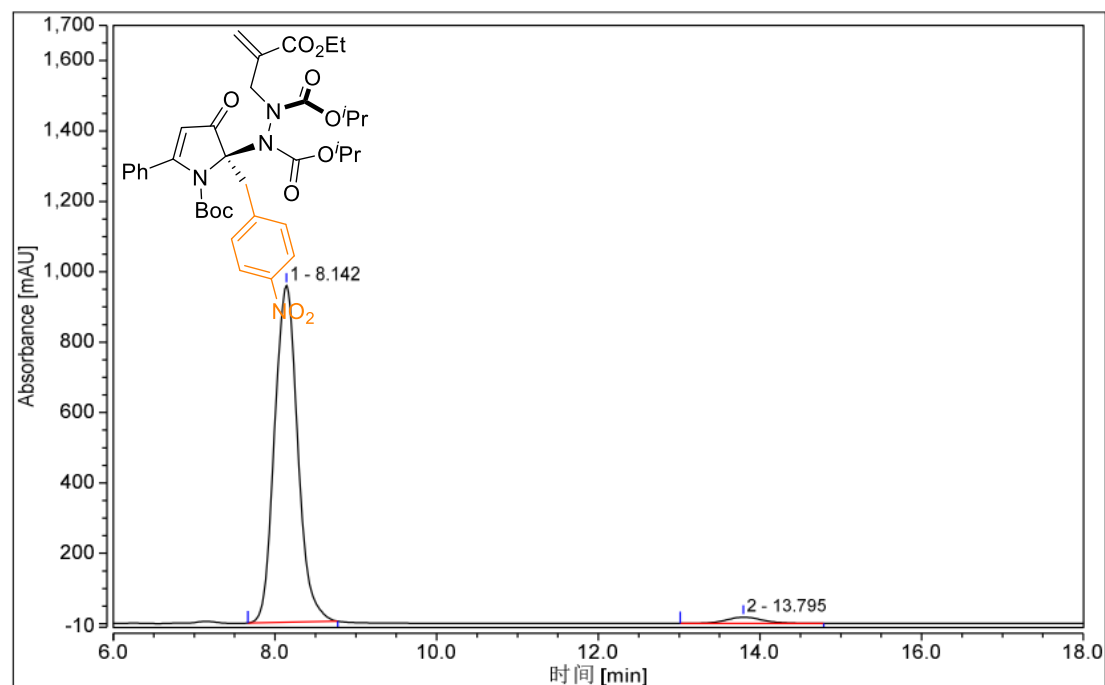

| Peak | RT min | Aera mAU*min | Height mAU | Area % | Height % |
|------|--------|--------------|------------|--------|----------|
| 1    | 8.142  | 317.782      | 957.775    | 97.13  | 98.18    |
| 2    | 13.795 | 9.395        | 17.794     | 2.87   | 1.82     |

**diisopropyl (R, R)-1-(1-(tert-butoxycarbonyl)-3-oxo-2,5-diphenyl-2,3-dihydro-1H-pyrrol-2-yl)-2-(2-(ethoxycarbonyl)allyl)hydrazine-1,2-dicarboxylate (6u)**

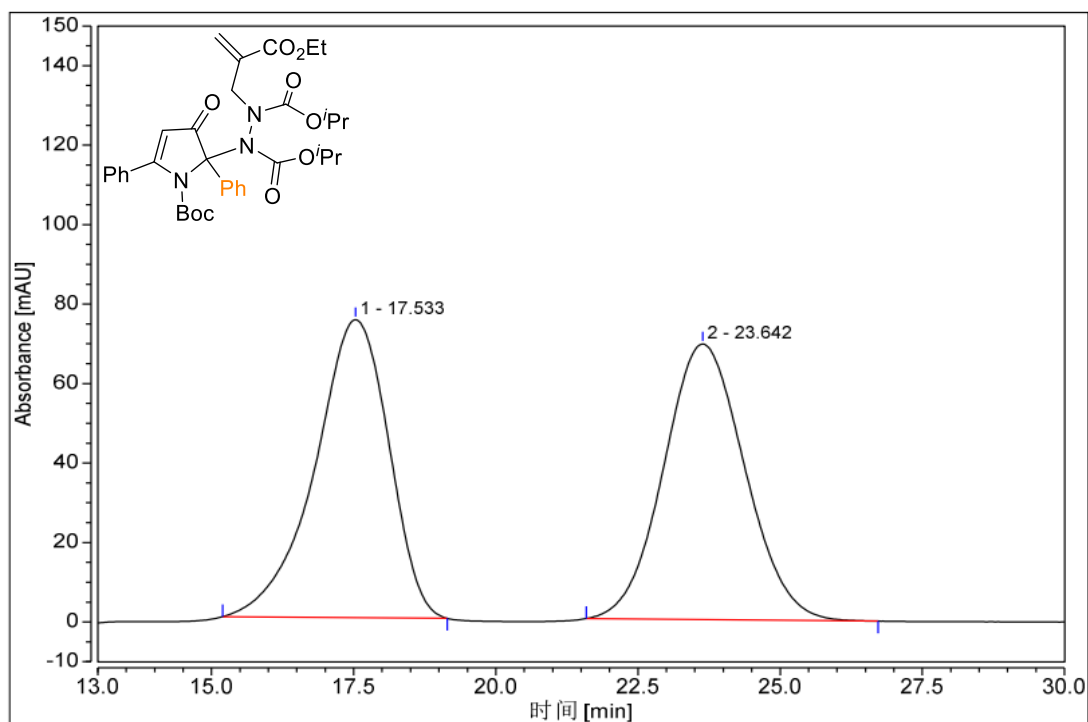

| Peak | RT min | Aera mAU*min | Height mAU | Area % | Height % |
|------|--------|--------------|------------|--------|----------|
| 1    | 17.533 | 112.815      | 74.985     | 49.57  | 51.94    |
| 2    | 23.642 | 114.766      | 69.373     | 50.43  | 48.06    |

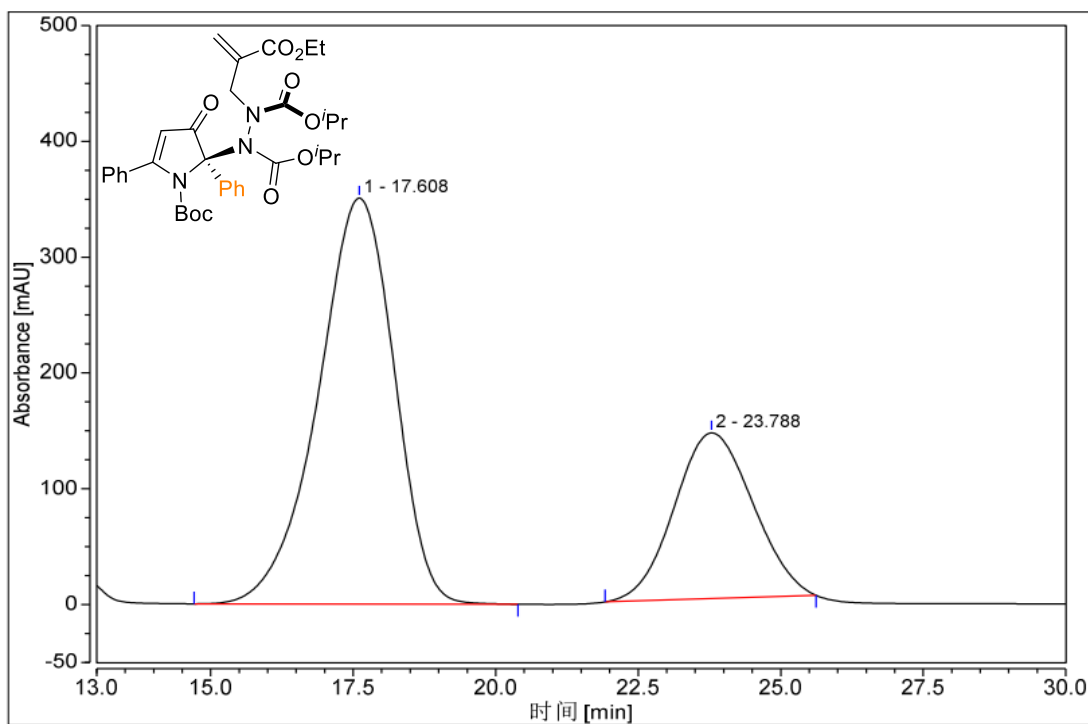

| Peak | RT min | Aera mAU*min | Height mAU | Area % | Height % |
|------|--------|--------------|------------|--------|----------|
| 1    | 17.608 | 541.174      | 350.431    | 70.36  | 71.02    |
| 2    | 23.788 | 228.001      | 142.990    | 29.64  | 28.98    |

diethyl (R)-1-(2-isopropyl-3-oxo-5-phenyl-2,3-dihydro-1H-pyrrol-2-yl)hydrazine-1,2-dicarboxylate (9)

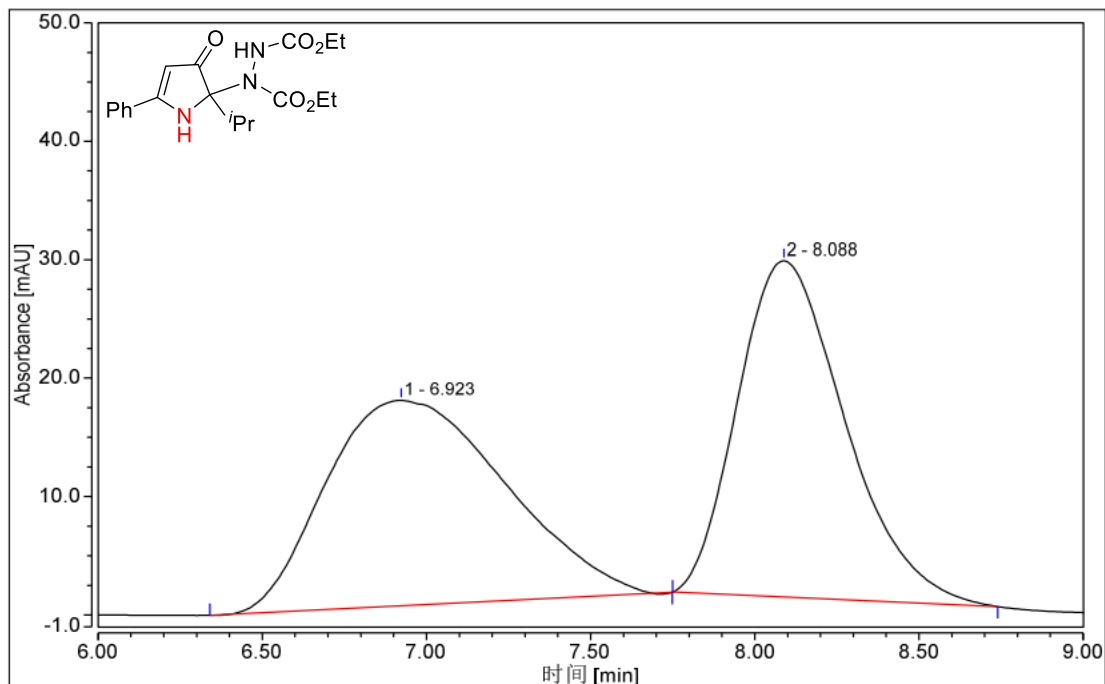

| Peak | RT min | Aera mAU*min | Height mAU | Area % | Height % |
|------|--------|--------------|------------|--------|----------|
| 1    | 6.923  | 10.958       | 17.352     | 50.48  | 37.93    |
| 2    | 8.088  | 10.747       | 28.392     | 49.52  | 62.07    |

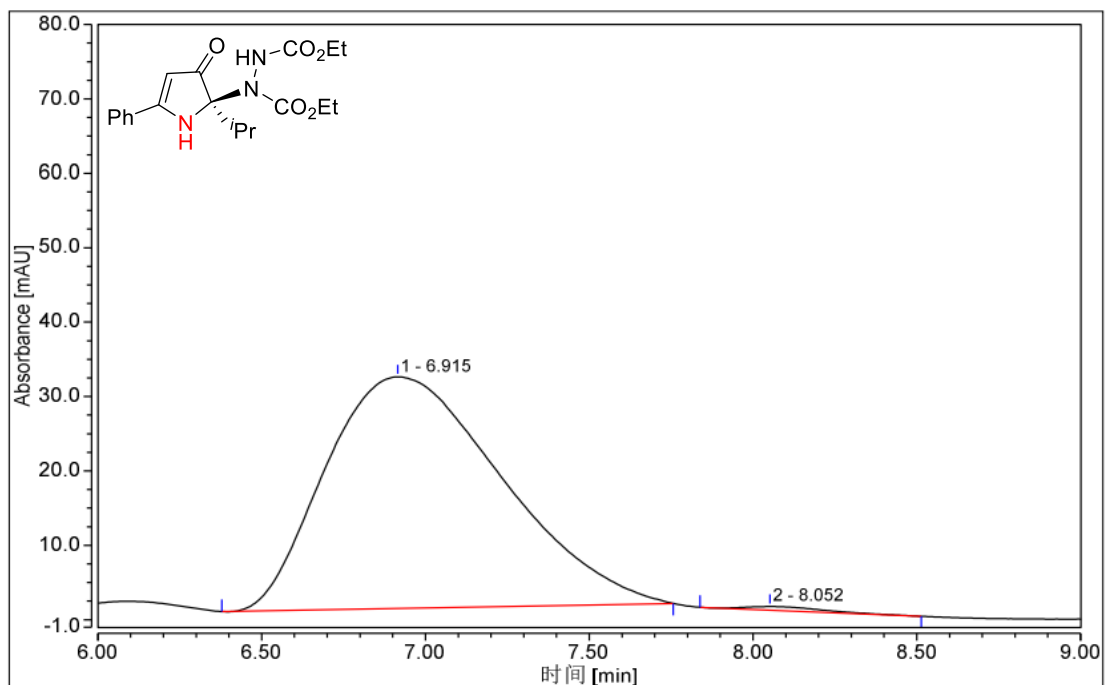

| Peak | RT min | Aera mAU*min | Height mAU | Area % | Height % |
|------|--------|--------------|------------|--------|----------|
| 1    | 6.915  | 19.398       | 31.113     | 99.29  | 98.44    |
| 2    | 8.052  | 0.139        | 0.492      | 0.71   | 1.56     |

diethyl (*R*)-1-(4-bromo-1-(tert-butoxycarbonyl)-2-isopropyl-3-oxo-5-phenyl-2,3-dihydro-1H-pyrrol-2-yl)hydrazine-1,2-dicarboxylate (10)

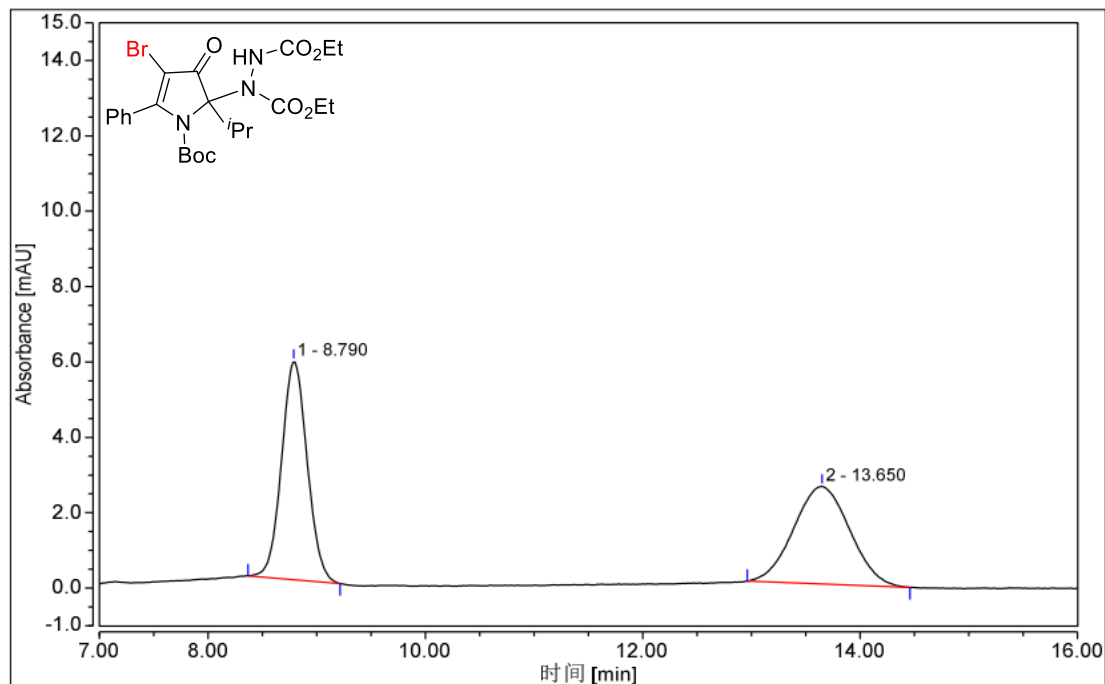

| Peak | RT min | Aera mAU*min | Height mAU | Area % | Height % |
|------|--------|--------------|------------|--------|----------|
| 1    | 8.790  | 1.587        | 5.791      | 50.66  | 69.10    |
| 2    | 13.650 | 1.545        | 2.589      | 49.34  | 30.90    |

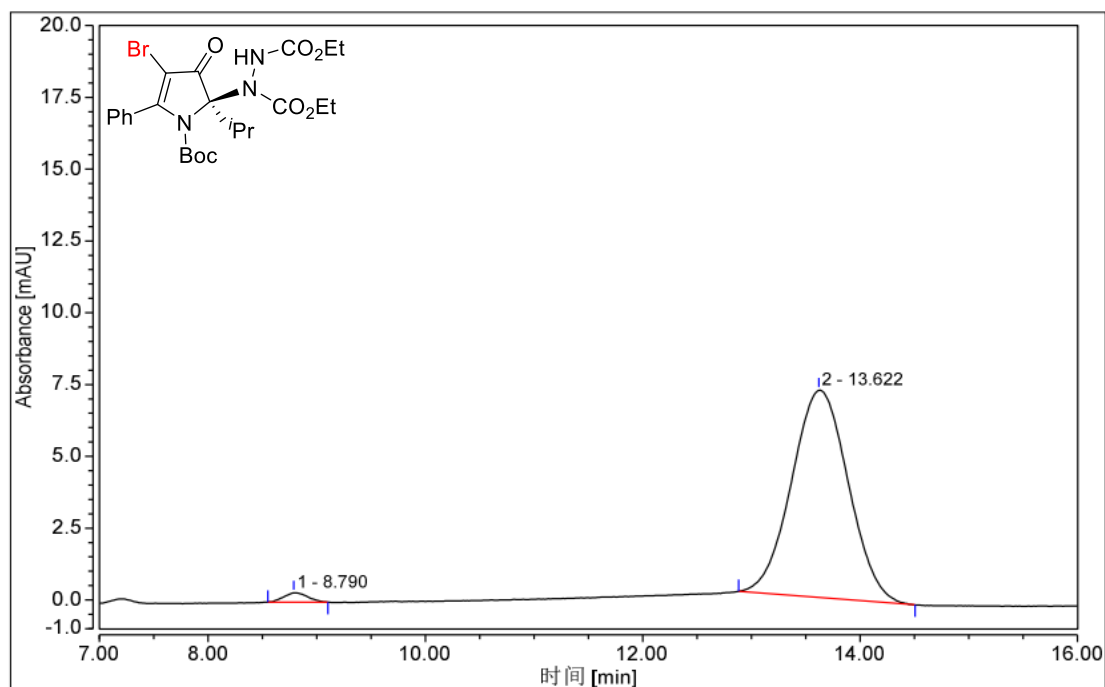

| Peak | RT min | Aera mAU*min | Height mAU | Area % | Height % |
|------|--------|--------------|------------|--------|----------|
| 1    | 8.790  | 0.086        | 0.330      | 1.93   | 4.37     |
| 2    | 13.622 | 4.363        | 7.222      | 98.07  | 95.63    |

diethyl (*R*)-1-(1-(tert-butoxycarbonyl)-4-iodo-2-isopropyl-3-oxo-5-phenyl-2,3-dihydro-1H-pyrrol-2-yl)hydrazine-1,2-dicarboxylate (11)

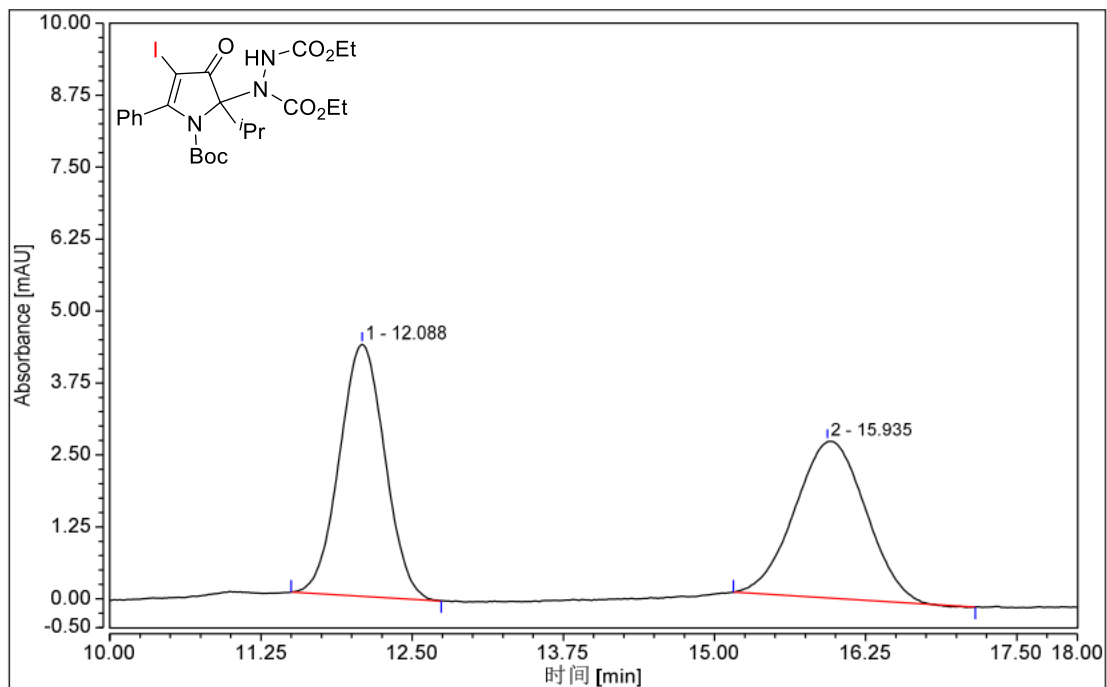

| Peak | RT min | Aera mAU*min | Height mAU | Area % | Height % |
|------|--------|--------------|------------|--------|----------|
| 1    | 12.088 | 1.902        | 4.377      | 50.67  | 61.66    |
| 2    | 15.935 | 1.851        | 2.721      | 49.33  | 38.34    |

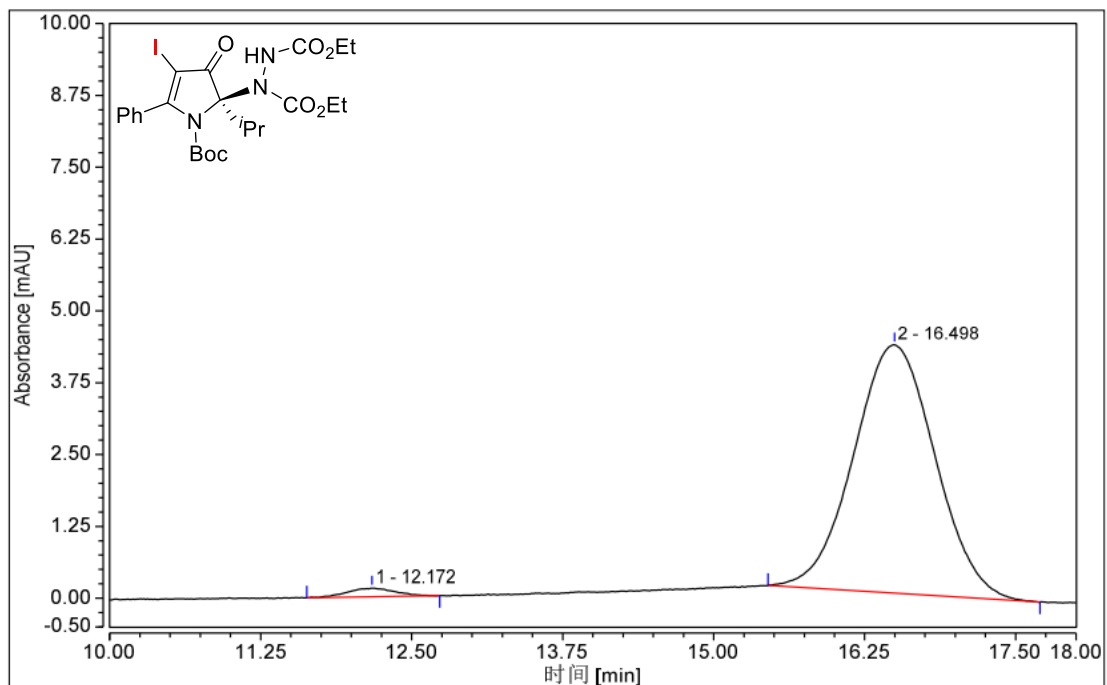

| Peak | RT min | Aera mAU*min | Height mAU | Area % | Height % |
|------|--------|--------------|------------|--------|----------|
| 1    | 12.172 | 0.068        | 0.155      | 1.96   | 3.46     |
| 2    | 16.498 | 3.381        | 4.323      | 98.04  | 96.54    |



diethyl (*R*)-1-(1-(tert-butoxycarbonyl)-2-isopropyl-3-oxo-4,5-diphenyl-2,3-dihydro-1H-pyrrol-2-yl)hydrazine-1,2-dicarboxylate (**12**)

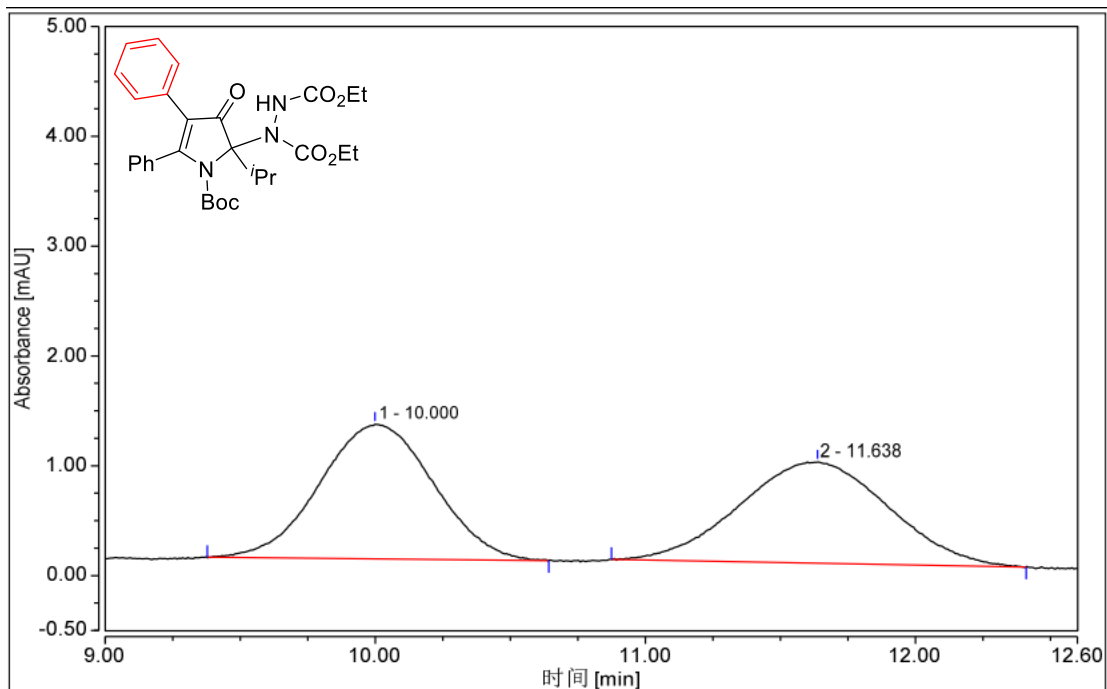

| Peak | RT min | Aera mAU*min | Height mAU | Area % | Height % |
|------|--------|--------------|------------|--------|----------|
| 1    | 10.000 | 0.598        | 1.228      | 50.51  | 57.09    |
| 2    | 11.638 | 0.586        | 0.923      | 49.49  | 42.91    |

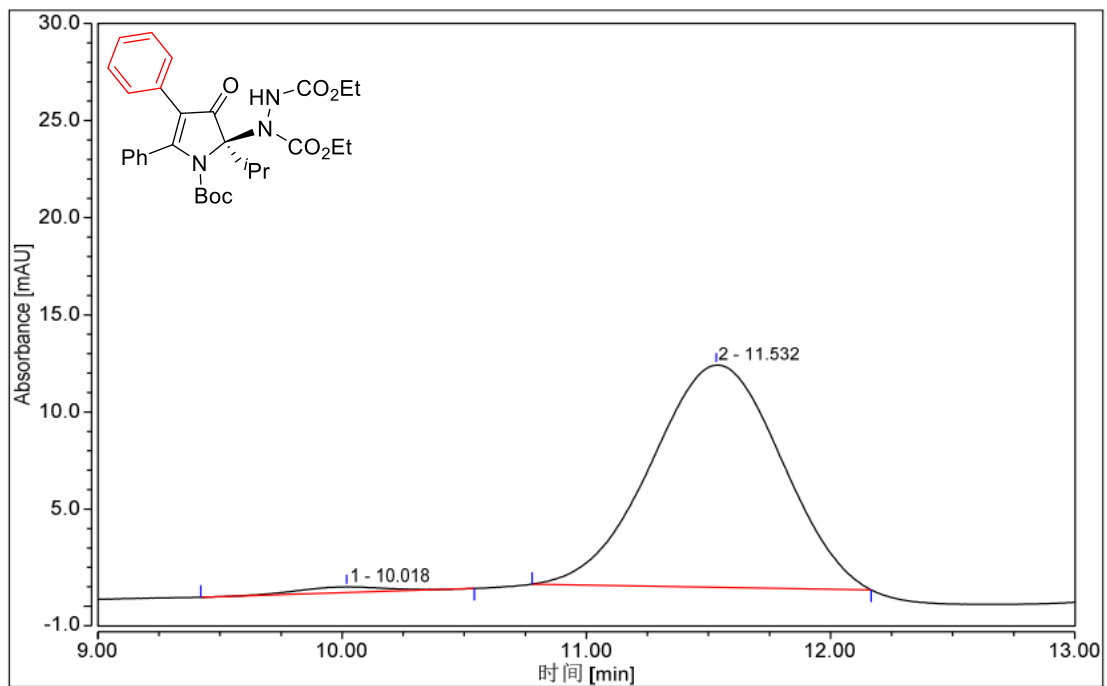

| Peak | RT min | Aera mAU*min | Height mAU | Area % | Height % |
|------|--------|--------------|------------|--------|----------|
| 1    | 10.018 | 0.121        | 0.297      | 1.68   | 2.53     |
| 2    | 11.532 | 7.052        | 11.448     | 98.32  | 97.47    |

diethyl (*R*)-1-(1-(tert-butoxycarbonyl)-4-ethynyl-2-isopropyl-3-oxo-5-phenyl-2,3-dihydro-1H-pyrrol-2-yl)hydrazine-1,2-dicarboxylate (13)

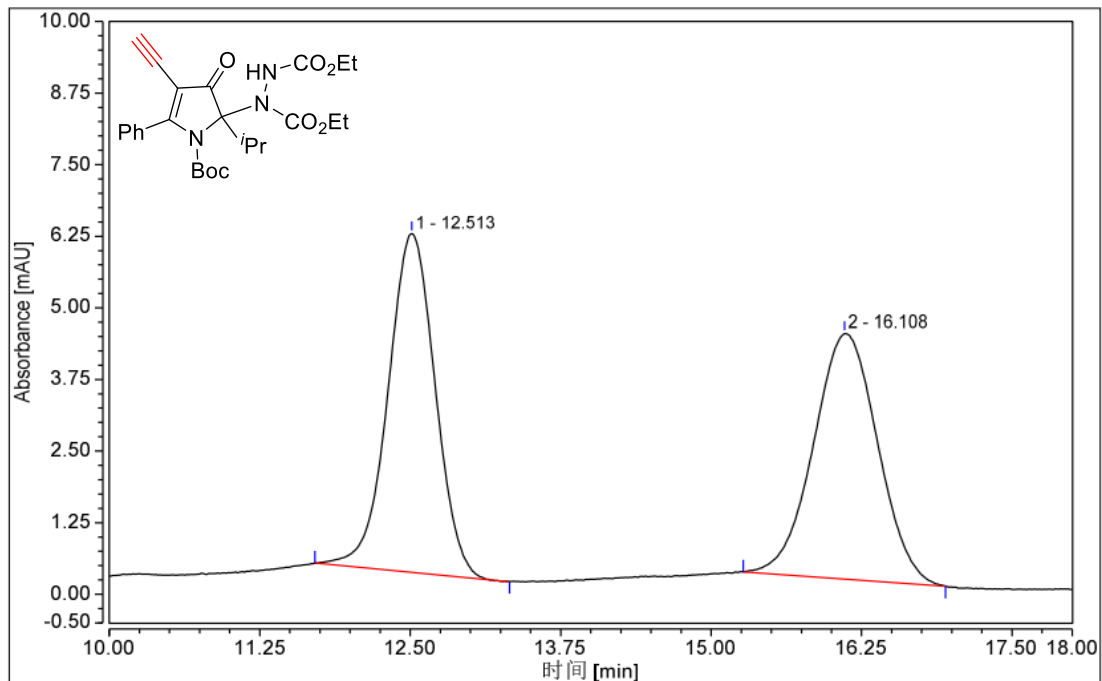

| Peak | RT min | Aera mAU*min | Height mAU | Area % | Height % |
|------|--------|--------------|------------|--------|----------|
| 1    | 12.513 | 2.681        | 5.918      | 50.29  | 57.95    |
| 2    | 16.108 | 2.649        | 4.294      | 49.71  | 42.05    |

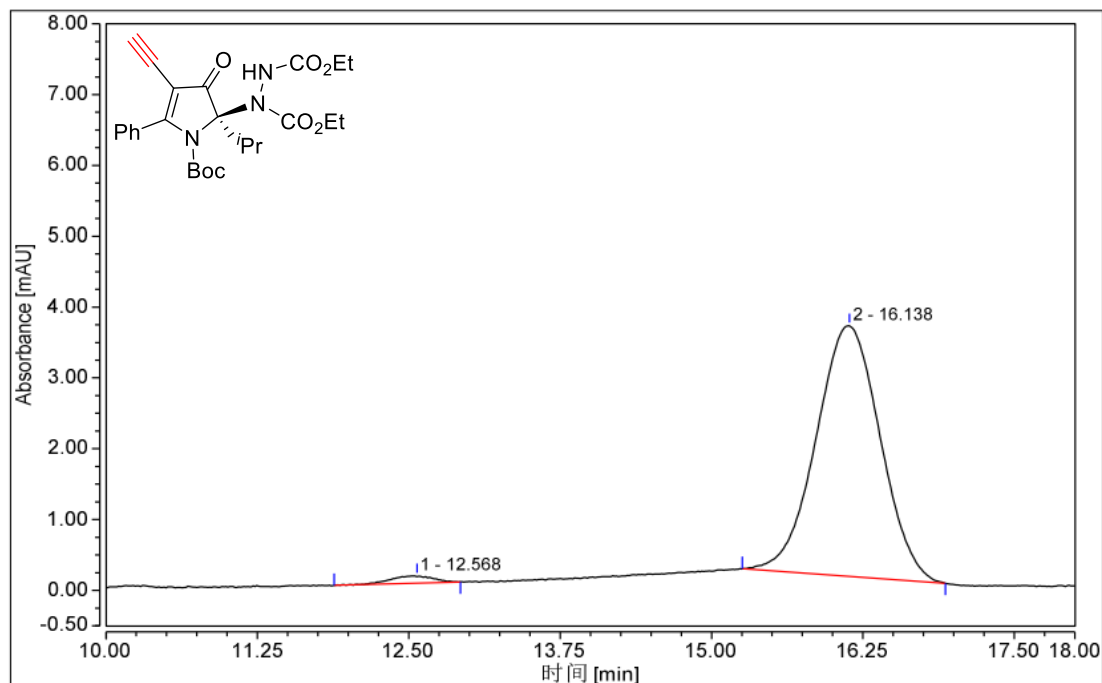

| Peak | RT min | Aera mAU*min | Height mAU | Area % | Height % |
|------|--------|--------------|------------|--------|----------|
| 1    | 12.568 | 0.042        | 0.104      | 1.88   | 2.86     |
| 2    | 16.138 | 2.169        | 3.539      | 98.12  | 97.14    |

**diisopropyl (R)-1-(4-bromo-1-(tert-butoxycarbonyl)-2-isopropyl-3-oxo-5-phenyl-2,3-dihydro-1H-pyrrol-2-yl)-2-(2-(ethoxycarbonyl)allyl)hydrazine-1,2-dicarboxylate (14)**

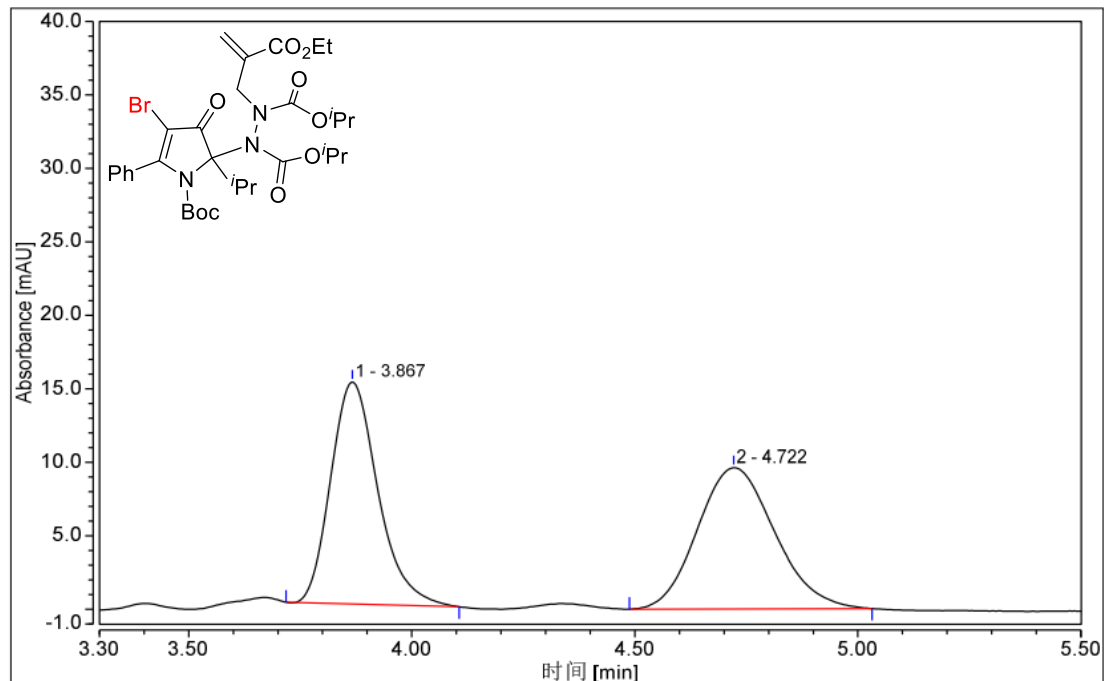

| Peak | RT min | Aera mAU*min | Height mAU | Area % | Height % |
|------|--------|--------------|------------|--------|----------|
| 1    | 3.867  | 1.851        | 15.110     | 49.00  | 61.13    |
| 2    | 4.722  | 1.926        | 9.608      | 51.00  | 38.87    |

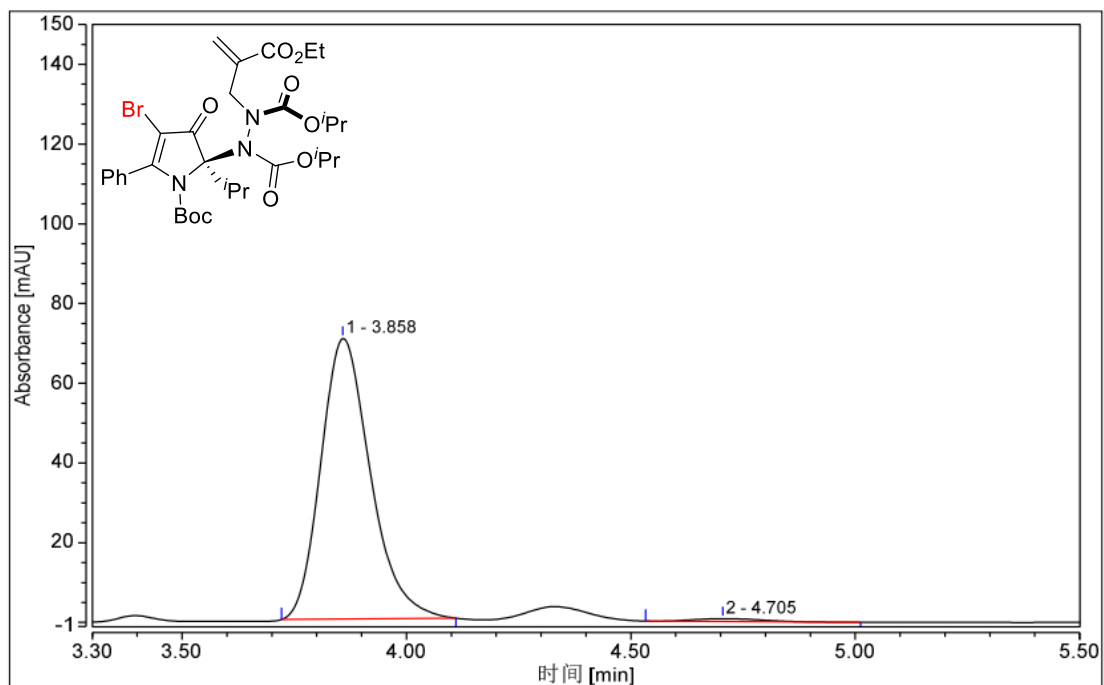

| Peak | RT min | Aera mAU*min | Height mAU | Area % | Height % |
|------|--------|--------------|------------|--------|----------|
| 1    | 3.858  | 9.001        | 70.413     | 98.60  | 98.98    |
| 2    | 4.705  | 0.128        | 0.727      | 1.40   | 1.02     |

**(R, R)-2-((2-(1-(tert-butoxycarbonyl)-2-isopropyl-3-oxo-5-phenyl-2,3-dihydro-1H-pyrrol-2-yl)-1,2-bis(isopropoxycarbonyl)hydrazineyl)methyl)acrylic acid (15)**

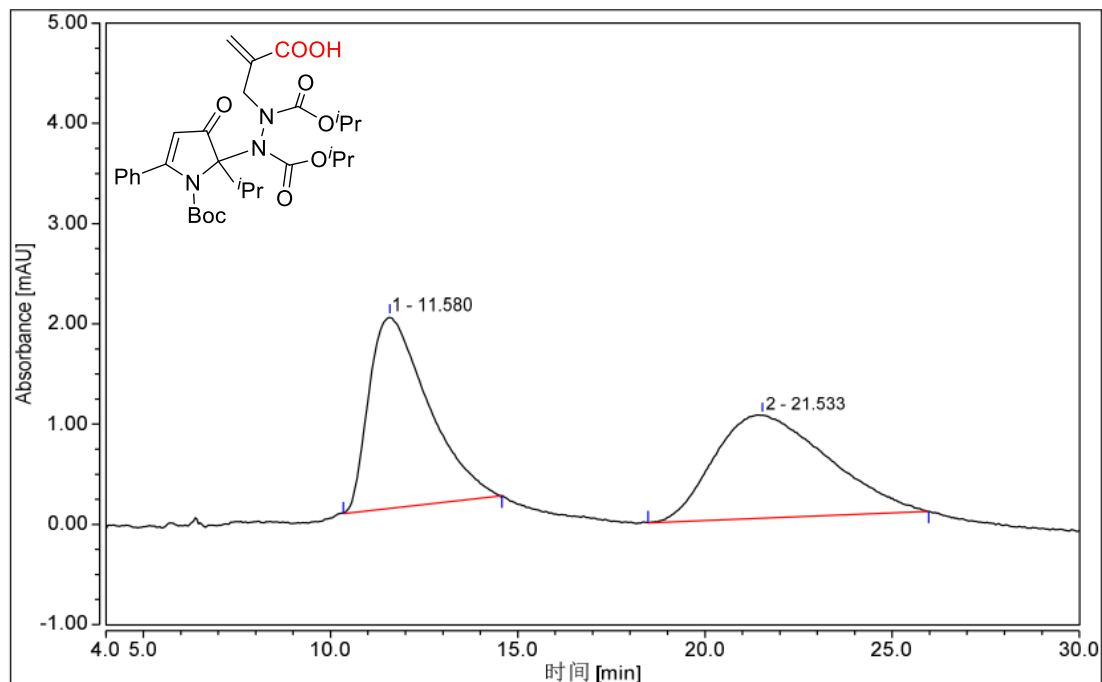

| Peak | RT min | Aera mAU*min | Height mAU | Area % | Height % |
|------|--------|--------------|------------|--------|----------|
| 1    | 11.580 | 3.502        | 1.918      | 49.14  | 64.99    |
| 2    | 21.533 | 3.624        | 1.033      | 50.86  | 35.01    |

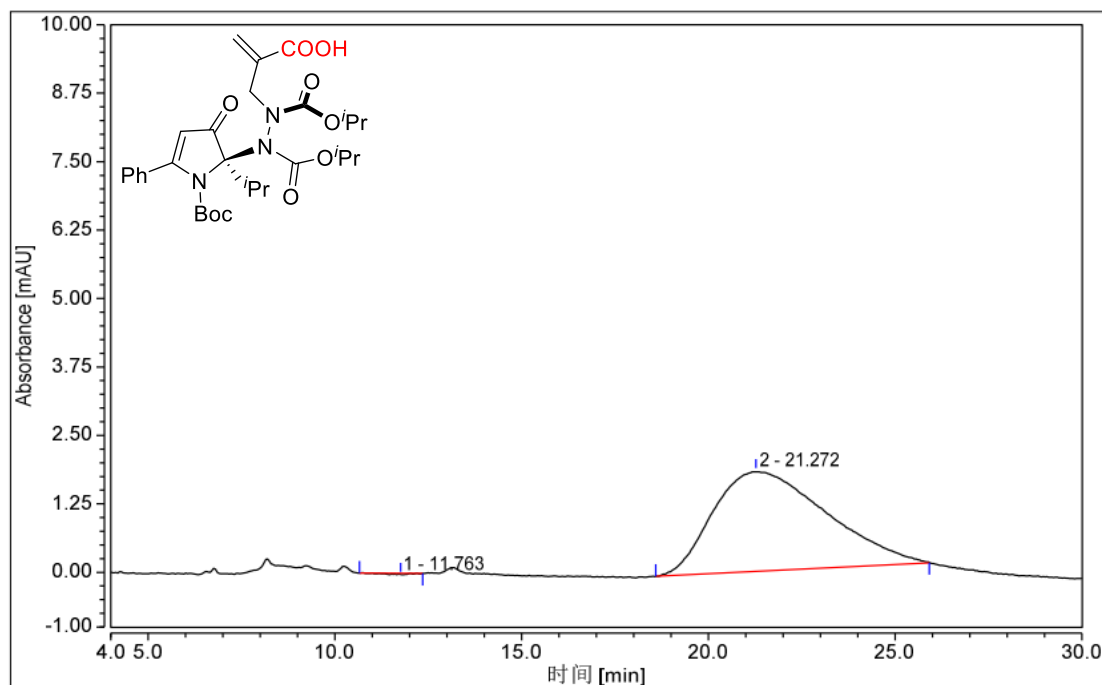

| Peak | RT min | Aera mAU*min | Height mAU | Area % | Height % |
|------|--------|--------------|------------|--------|----------|
| 1    | 11.763 | 0.017        | 0.028      | 0.26   | 1.52     |
| 2    | 21.272 | 6.391        | 1.831      | 99.74  | 98.48    |

## 12. Computational Methods

Geometry optimizations and frequency calculations were performed at M06-2X/6-31G(d) level. IRC calculations were performed to verify the nature of transition states located, except for the N-N rotational transition state of **3c**, whose imaginary frequency was too low for the calculation to succeed. Instead, manual inspections were employed to verify its nature. Higher level single-point energy calculations were performed at M06-2X/6-311+G(2d,p) level. A slightly larger basis set, 6-311++G(2d,p) was used for TDDFT simulations of CD spectra to ensure the accuracy of the result. Solvent effect was incorporated using the SMD<sup>5</sup> implicit reaction field model. Dichloromethane was used as the solvent for the reaction profile of N-alkylation of **3c**, and cyclohexane for the barrier of rotation around the N-N axis of **3c**. Relative free energies and enthalpies were computed at the temperature of 298 K and reported in kcal/mol unless otherwise stated. An entropy correction term, of the magnitude of 7.06 kJ/mol at 298 K, was included to account for the change of state from gaseous to standard state of 1 M.<sup>6</sup> For the Quasi-harmonic approximation treatment of low frequencies, the python program GoodVibes<sup>7</sup> was employed, with a frequency cutoff of 100 cm<sup>-1</sup> and the option of a linked job. Graphics of optimized structures were rendered using the CYLview program.<sup>8</sup> All DFT calculations were carried out with the Gaussian 16 suite of programs.<sup>9</sup>

### Barrier of Rotation around the N–N axis of **3c**

The substrate **3c** also has an N–N axis, whose rotational barrier was calculated to be 22.4 kcal/mol. An estimation of rotational rate constant using the Eyring equation gave a value of  $2.36 \times 10^{-4} \text{ M} \cdot \text{S}^{-1}$ , suggesting a slow but measurable interconversion between the two configurations **3c-1** and **3c-2**. Given this equilibrium, it seems that the reaction diastereoselectivity is governed by steps of N-arylation reaction.

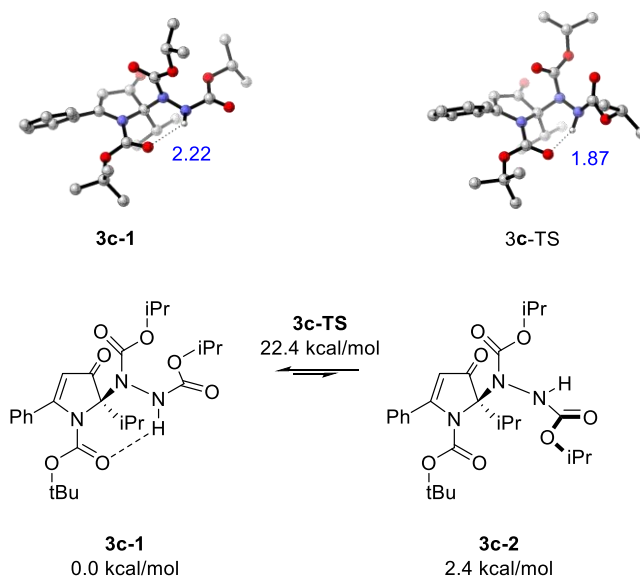

**Figure S1.** Rotation barrier of **3c**

### Diastereoselectivity of *N*-alkylation of **3c** through Morita-Baylis-Hillman Reaction

The diastereoselectivity-determining transition states, **TS4**, contain many low-lying frequencies ( $<100\text{ cm}^{-1}$ ), which may introduce errors to the calculated free energy values. One way to treat such frequencies is to use quasi-harmonic approximation to correct the values. As shown in **Table S2**, after correction, the energy difference for **3c** reduced to 3.0 kcal/mol while that of **3k** to 1.4 kcal/mol. Another less commonly used method is to ignore the entropic contribution entirely and compare the difference in enthalpy instead. Again, this treatment led to reduced energy differences, 2.0 kcal/mol for **3c** and 0.8 kcal/mol for **3k**, which seems to agree with the experimental result better.

**Table S2.** Diastereoselectivity-determining transition states **TS4**

| Entry                                                       | $H_{\text{corr}}^{\text{a}}$ | $G_{\text{corr}}^{\text{a}}$ | $E_{\text{L}}^{\text{a}}$ | $E_{\text{H}}^{\text{b}}$ | $H_{\text{H}}^{\text{b}}$ | $G_{\text{H}}^{\text{b}}$ | $\text{QH-G}_{\text{H}}^{\text{b,c}}$ |
|-------------------------------------------------------------|------------------------------|------------------------------|---------------------------|---------------------------|---------------------------|---------------------------|---------------------------------------|
| <i>RR</i> - <b>TS4</b>                                      | 1.142197                     | 0.967944                     | -2891.180524              | -2892.085129              | -2890.942932              | -2891.117185              | -2891.099924                          |
| <i>RS</i> - <b>TS4</b>                                      | 1.142539                     | 0.971931                     | -2891.178554              | -2892.082296              | -2890.939757              | -2891.110365              | -2891.095097                          |
| <b>3k-RR-TS4</b>                                            | 1.082237                     | 0.912270                     | -2812.596138              | -2813.478135              | -2812.395898              | -2812.565865              | -2812.548528                          |
| <b>3k-RS-TS4</b>                                            | 1.082089                     | 0.914441                     | -2812.593862              | -2813.476777              | -2812.394688              | -2812.562336              | -2812.546319                          |
| $\Delta_{\text{RS-RR}}/\text{kcal}\cdot\text{mol}^{-1}$     |                              |                              |                           |                           | 2.0                       | 4.3                       | 3.0                                   |
| $\Delta_{\text{3k, RS-RR}}/\text{kcal}\cdot\text{mol}^{-1}$ |                              |                              |                           |                           | 0.8                       | 2.2                       | 1.4                                   |

a) at 6-31G(d) level. b) at 6-311+G(2d,p) level. c) Quasi-harmonic approximation corrected

## CD Spectra

To further validate the assignment of configuration of the N-N axis, we turned to simulate CD spectra of conformers of **6a** and compare them to experimentally obtained one (**Figure S2**). Only two of the lowest-energy conformers, namely *RR-6a* and *RS-6a*, were chosen for comparison. Result shown in **Figure S3** is consistent with the assignment of **6a** as *RR-6a*.

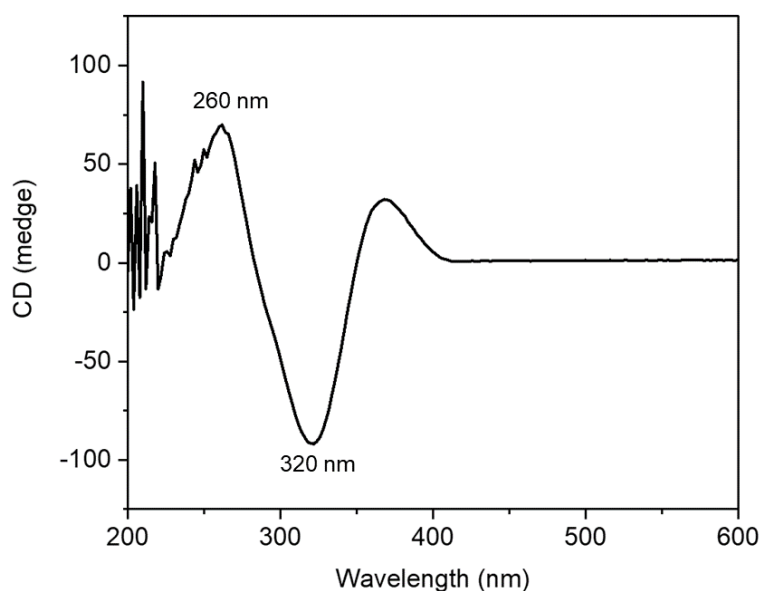

**Figure S2.** Experimental CD spectrum

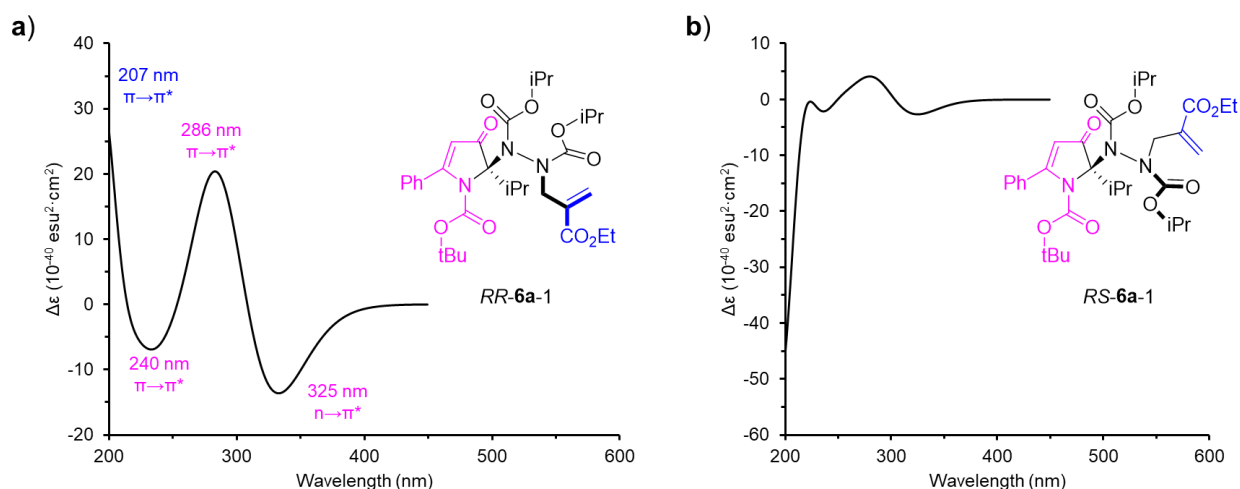

**Figure S3.** Computationally simulated CD spectra of a) *RR-6a* and b) *RS-6a*. The colors of assignment of peaks are based on the location of the corresponding molecular orbitals of the electronic transitions. Peak positions of *RR-6a* were marked to be compared with the experimental spectrum.

## Atomic Coordinates and Associated Thermodynamics Data

### N-alkylation of **3c** to Synthesize *RR-6a*

#### **3c**

|   |             |             |             |
|---|-------------|-------------|-------------|
| C | 2.14504400  | 0.77928000  | 1.09357300  |
| C | 1.68621800  | 1.44421500  | 2.18047100  |
| H | 2.22809800  | 2.20999700  | 2.71822500  |
| C | 0.27112800  | 1.15841600  | 2.34339200  |
| O | -0.53481700 | 1.63936300  | 3.11086000  |
| C | -0.08789800 | 0.04117300  | 1.32197000  |
| N | 1.16084200  | -0.03759600 | 0.52746700  |
| C | 1.32994600  | -1.08538000 | -0.36886700 |
| O | 0.38308000  | -1.59269300 | -0.94169700 |
| O | 2.59762200  | -1.45015000 | -0.46872600 |
| C | 3.04422700  | -2.41211300 | -1.48303600 |
| C | 2.70132900  | -1.89441200 | -2.87385800 |
| H | 3.12533300  | -0.89540600 | -3.01992800 |
| H | 1.62210900  | -1.85588200 | -3.03390500 |
| H | 3.13936500  | -2.56486500 | -3.61969300 |
| C | 4.55153500  | -2.43162500 | -1.26867700 |
| H | 4.97172900  | -1.43246300 | -1.42338500 |
| H | 5.01607900  | -3.12351800 | -1.97699500 |
| H | 4.78932000  | -2.75811000 | -0.25165900 |
| C | 2.43355000  | -3.77812600 | -1.19686900 |
| H | 1.35627100  | -3.77800000 | -1.36992100 |
| H | 2.63025800  | -4.06877000 | -0.15967800 |
| H | 2.89616800  | -4.52052300 | -1.85469400 |
| C | 3.45712800  | 0.99801700  | 0.45434800  |
| C | 5.91938800  | 1.54952500  | -0.73333000 |
| C | 3.52514000  | 1.29790000  | -0.91180700 |



|   |             |             |             |
|---|-------------|-------------|-------------|
| C | 4.62144800  | 0.98549700  | 1.22328400  |
| C | 5.85193600  | 1.25301200  | 0.62565000  |
| C | 4.75219000  | 1.57858000  | -1.50011600 |
| H | 2.61243800  | 1.32521000  | -1.50220700 |
| H | 4.56222200  | 0.75049900  | 2.28212800  |
| H | 6.75689800  | 1.23055400  | 1.22483700  |
| H | 4.80024500  | 1.82086800  | -2.55755300 |
| H | 6.87809000  | 1.76228700  | -1.19652800 |
| C | -0.35247900 | -1.28467800 | 2.08448000  |
| H | -0.59413800 | -2.02487800 | 1.31634400  |
| C | -1.54121600 | -1.16827100 | 3.04270600  |
| H | -1.25961900 | -0.62430900 | 3.94832500  |
| H | -1.85876800 | -2.17400800 | 3.33565500  |
| H | -2.39352500 | -0.65037800 | 2.59658100  |
| C | 0.88620900  | -1.77157600 | 2.84205400  |
| H | 1.17527100  | -1.07542300 | 3.63653800  |
| H | 1.75028300  | -1.92753700 | 2.18784800  |
| H | 0.65215900  | -2.73091900 | 3.31355700  |
| N | -1.22822300 | 0.40478800  | 0.49568900  |
| C | -1.16759300 | 1.60554900  | -0.19638200 |
| O | -0.35016700 | 2.46618700  | 0.05449300  |
| O | -2.10776300 | 1.67617700  | -1.13686700 |
| C | -2.26982300 | 2.95943500  | -1.79515400 |
| H | -1.27097500 | 3.35090100  | -2.00592200 |
| C | -3.02481700 | 3.89582600  | -0.86917300 |
| H | -4.00157800 | 3.46825400  | -0.62072000 |
| H | -3.17836300 | 4.86107500  | -1.36087600 |
| H | -2.46599000 | 4.06275400  | 0.05534300  |
| C | -3.01479100 | 2.66225300  | -3.08044000 |
| H | -2.45089000 | 1.96369300  | -3.70473200 |

|   |             |             |             |
|---|-------------|-------------|-------------|
| H | -3.16545600 | 3.58878900  | -3.64154300 |
| H | -3.99429800 | 2.22548800  | -2.85943900 |
| N | -2.06812200 | -0.58485800 | 0.03738000  |
| C | -3.42366700 | -0.40189900 | 0.20545900  |
| O | -3.93293000 | 0.39027200  | 0.96630800  |
| O | -4.07697600 | -1.26304700 | -0.58387800 |
| C | -5.52084800 | -1.27919300 | -0.45842600 |
| H | -5.85338100 | -0.24239300 | -0.35760000 |
| C | -6.03871400 | -1.88321900 | -1.74809000 |
| H | -7.13211000 | -1.90537500 | -1.73189400 |
| H | -5.67207400 | -2.90816700 | -1.86457900 |
| H | -5.71463800 | -1.29357600 | -2.61019100 |
| C | -5.90980800 | -2.07776300 | 0.77301400  |
| H | -6.99918700 | -2.10154800 | 0.87279700  |
| H | -5.49019700 | -1.62619000 | 1.67585100  |
| H | -5.54563800 | -3.10669100 | 0.68562300  |
| H | -1.74592900 | -1.07916900 | -0.79078300 |

Zero-point correction= 0.619904 (Hartree/Particle)

Thermal correction to Energy= 0.657596

Thermal correction to Enthalpy= 0.658540

Thermal correction to Gibbs Free Energy= 0.549382

Sum of electronic and zero-point Energies= -1702.643752

Sum of electronic and thermal Energies= -1702.606059

Sum of electronic and thermal Enthalpies= -1702.605115

Sum of electronic and thermal Free Energies= -1702.714274

E(RM062X/6-311+G(2d,p)) = -1703.79554975

#### 4a-CONF1

|   |             |             |             |
|---|-------------|-------------|-------------|
| C | -2.30554400 | -0.47509700 | -1.39997200 |
|---|-------------|-------------|-------------|

|   |             |            |             |
|---|-------------|------------|-------------|
| C | -2.38329400 | 1.00065700 | -1.67740800 |
|---|-------------|------------|-------------|

|   |             |             |             |
|---|-------------|-------------|-------------|
| H | -3.41303200 | 1.35759500  | -1.65394500 |
| H | -1.93326800 | 1.23049600  | -2.64440400 |
| C | -3.04857200 | -1.02619900 | -0.22418800 |
| O | -2.98748900 | -2.17575300 | 0.15322800  |
| O | -3.80318900 | -0.09440000 | 0.36572700  |
| C | -4.55376000 | -0.52565100 | 1.51540500  |
| H | -3.85618700 | -0.92205400 | 2.25884600  |
| H | -5.22426500 | -1.33508800 | 1.21214800  |
| C | -5.31112600 | 0.67518200  | 2.03262900  |
| H | -4.62057000 | 1.47391100  | 2.31694000  |
| H | -5.89436800 | 0.38982500  | 2.91252000  |
| H | -5.99653500 | 1.05827200  | 1.27141200  |
| O | -1.71962900 | 1.74906000  | -0.64444900 |
| C | -0.38514100 | 1.80717600  | -0.75012400 |
| O | 0.25768000  | 1.34367400  | -1.66373300 |
| O | 0.06825100  | 2.46239100  | 0.30992400  |
| C | 1.50482400  | 2.69764700  | 0.47198400  |
| C | 2.02168400  | 3.56492700  | -0.66964800 |
| H | 3.05555800  | 3.85506700  | -0.45826200 |
| H | 1.41999400  | 4.47576700  | -0.75300800 |
| H | 1.99707600  | 3.03107100  | -1.62096100 |
| C | 1.57038900  | 3.45307700  | 1.79260800  |
| H | 1.16017400  | 2.84348200  | 2.60338300  |
| H | 0.99950500  | 4.38442900  | 1.73034000  |
| H | 2.61052100  | 3.69513500  | 2.02832600  |
| C | 2.24283000  | 1.36827100  | 0.57715600  |
| H | 1.78944200  | 0.74633500  | 1.35580100  |
| H | 3.28417500  | 1.55938500  | 0.85427900  |
| H | 2.22728500  | 0.82471400  | -0.36870700 |
| C | -1.58663900 | -1.31320800 | -2.14583800 |

|                                              |             |                             |             |
|----------------------------------------------|-------------|-----------------------------|-------------|
| H                                            | -1.01850800 | -0.95733300                 | -2.99988100 |
| H                                            | -1.55497000 | -2.37384300                 | -1.91424500 |
| Zero-point correction=                       |             | 0.288917 (Hartree/Particle) |             |
| Thermal correction to Energy=                |             | 0.306943                    |             |
| Thermal correction to Enthalpy=              |             | 0.307887                    |             |
| Thermal correction to Gibbs Free Energy=     |             | 0.241084                    |             |
| Sum of electronic and zero-point Energies=   |             | -805.531183                 |             |
| Sum of electronic and thermal Energies=      |             | -805.513158                 |             |
| Sum of electronic and thermal Enthalpies=    |             | -805.512214                 |             |
| Sum of electronic and thermal Free Energies= |             | -805.579016                 |             |
| E(RM062X/6-311+G(2d,p)) =                    |             | -806.085072131              |             |

#### 4a-CONF2

|   |             |             |             |
|---|-------------|-------------|-------------|
| C | -1.52237600 | -1.73258000 | 0.01308400  |
| C | -0.61377500 | -1.61913700 | -1.17634000 |
| H | -1.16624700 | -1.34170000 | -2.07555900 |
| H | -0.09406900 | -2.56516000 | -1.34784100 |
| C | -2.37301600 | -0.55388100 | 0.36711500  |
| O | -3.12482600 | -0.50021400 | 1.31476800  |
| O | -2.20763300 | 0.44411100  | -0.50626800 |
| C | -2.98567800 | 1.63180700  | -0.27444100 |
| H | -2.82036000 | 1.96484000  | 0.75387200  |
| H | -4.04507500 | 1.38200900  | -0.38716800 |
| C | -2.52917000 | 2.65909800  | -1.28343300 |
| H | -1.46873500 | 2.88437900  | -1.14036200 |
| H | -3.10175700 | 3.58214800  | -1.15678500 |
| H | -2.67550500 | 2.29361700  | -2.30380700 |
| O | 0.37895400  | -0.61727700 | -0.90630600 |
| C | 0.58741600  | 0.30233800  | -1.85739200 |
| O | 0.04511000  | 0.33121700  | -2.93723700 |

|   |             |             |             |
|---|-------------|-------------|-------------|
| O | 1.50383500  | 1.14340500  | -1.39264100 |
| C | 2.10758700  | 2.14019900  | -2.28030000 |
| C | 1.06942500  | 3.17280900  | -2.70008500 |
| H | 1.55794400  | 3.94393300  | -3.30429900 |
| H | 0.63630100  | 3.65505400  | -1.81819000 |
| H | 0.27252100  | 2.71807200  | -3.29140100 |
| C | 3.16870600  | 2.77646700  | -1.39229000 |
| H | 3.90463300  | 2.03028700  | -1.07784300 |
| H | 2.70924000  | 3.21338100  | -0.50056200 |
| H | 3.68507300  | 3.56790500  | -1.94290700 |
| C | 2.75471000  | 1.44895300  | -3.47545800 |
| H | 3.41841100  | 0.64821400  | -3.13295200 |
| H | 3.35530000  | 2.17895600  | -4.02669400 |
| H | 2.00819400  | 1.03034300  | -4.15233900 |
| C | -1.63006400 | -2.83872000 | 0.74710800  |
| H | -1.03501400 | -3.72088700 | 0.52936400  |
| H | -2.32436800 | -2.88404400 | 1.58071000  |

Zero-point correction= 0.288943 (Hartree/Particle)

Thermal correction to Energy= 0.306901

Thermal correction to Enthalpy= 0.307845

Thermal correction to Gibbs Free Energy= 0.241889

Sum of electronic and zero-point Energies= -805.531641

Sum of electronic and thermal Energies= -805.513683

Sum of electronic and thermal Enthalpies= -805.512739

Sum of electronic and thermal Free Energies= -805.578695

E(RM062X/6-311+G(2d,p)) = -806.085269474

DMAP

|   |             |             |             |
|---|-------------|-------------|-------------|
| N | -0.08665800 | -1.60267000 | -1.19259700 |
|---|-------------|-------------|-------------|

|   |             |             |            |
|---|-------------|-------------|------------|
| C | -0.00641700 | -1.78221400 | 0.13238300 |
|---|-------------|-------------|------------|

|   |             |             |             |
|---|-------------|-------------|-------------|
| H | -0.95432200 | -1.83312100 | 0.66547700  |
| C | 1.08759700  | -1.53989000 | -1.83406300 |
| H | 1.03561900  | -1.39450400 | -2.91177600 |
| C | 1.17195600  | -1.90281000 | 0.85002400  |
| H | 1.12700500  | -2.04252700 | 1.92303700  |
| C | 2.40778400  | -1.83636500 | 0.16637500  |
| C | 2.33057500  | -1.64536000 | -1.23244000 |
| H | 3.22233800  | -1.58269700 | -1.84379400 |
| N | 3.59880500  | -1.94928500 | 0.81479400  |
| C | 4.84009200  | -1.83117400 | 0.07214300  |
| H | 5.67640700  | -1.91296500 | 0.76588900  |
| H | 4.91033400  | -0.86283700 | -0.43828500 |
| H | 4.93568200  | -2.62434700 | -0.67958000 |
| C | 3.62365900  | -2.15307600 | 2.25145900  |
| H | 4.65870000  | -2.25721600 | 2.57591600  |
| H | 3.08318100  | -3.06453700 | 2.53340300  |
| H | 3.17550700  | -1.30701100 | 2.78758700  |

Zero-point correction= 0.164337 (Hartree/Particle)

Thermal correction to Energy= 0.172890

Thermal correction to Enthalpy= 0.173834

Thermal correction to Gibbs Free Energy= 0.129495

Sum of electronic and zero-point Energies= -381.933881

Sum of electronic and thermal Energies= -381.925328

Sum of electronic and thermal Enthalpies= -381.924384

Sum of electronic and thermal Free Energies= -381.968722

E(RM062X/6-311+G(2d,p)) = -382.213973036

## INT1-CONF2

|   |             |             |             |
|---|-------------|-------------|-------------|
| C | -2.21179900 | -1.46591000 | -0.87621800 |
| C | -2.12141900 | -0.46940400 | -1.95386800 |

|   |             |             |             |
|---|-------------|-------------|-------------|
| H | -2.89071600 | 0.29869700  | -1.87665800 |
| H | -2.12691700 | -0.90362300 | -2.95994000 |
| C | -2.90733600 | -1.23274300 | 0.32267600  |
| O | -2.79549100 | -1.86489600 | 1.39115100  |
| O | -3.83318000 | -0.21571600 | 0.24079100  |
| C | -4.31162700 | 0.27860200  | 1.48164100  |
| H | -3.46541200 | 0.54994700  | 2.12461300  |
| H | -4.88363400 | -0.49650600 | 2.00421600  |
| C | -5.17413400 | 1.48729600  | 1.18193600  |
| H | -4.58735900 | 2.25573100  | 0.66978400  |
| H | -5.57211100 | 1.91136100  | 2.10892500  |
| H | -6.01555900 | 1.21055600  | 0.53917300  |
| O | -0.79782900 | 0.21915500  | -1.97442400 |
| C | -0.60356500 | 1.11912400  | -1.02184100 |
| O | -1.46006600 | 1.61658500  | -0.32467500 |
| O | 0.70883300  | 1.39156500  | -0.97532600 |
| C | 1.19134500  | 2.52601600  | -0.19859200 |
| C | 0.87762500  | 2.35625800  | 1.28459100  |
| H | 1.42695800  | 3.11277900  | 1.85498300  |
| H | 1.20280800  | 1.36677900  | 1.62249300  |
| H | -0.18828600 | 2.46392600  | 1.48645000  |
| C | 2.69774500  | 2.47089000  | -0.42361200 |
| H | 2.92839800  | 2.51355200  | -1.49271200 |
| H | 3.10806400  | 1.54191100  | -0.01210200 |
| H | 3.18190200  | 3.31649700  | 0.07385500  |
| C | 0.60813200  | 3.81599800  | -0.76520000 |
| H | 0.83764700  | 3.89750900  | -1.83272000 |
| H | 1.05068300  | 4.67473000  | -0.25065800 |
| H | -0.47490000 | 3.84995000  | -0.62950200 |
| C | -1.24261000 | -2.57856800 | -0.89103400 |

|   |             |             |             |
|---|-------------|-------------|-------------|
| H | -1.08546400 | -3.00317900 | -1.88862000 |
| H | -1.53211600 | -3.37494000 | -0.20156800 |
| N | 0.15528400  | -2.16699100 | -0.44423800 |
| C | 0.32218200  | -1.75190600 | 0.83055800  |
| H | -0.57187300 | -1.79703600 | 1.44851400  |
| C | 1.18953900  | -2.11879200 | -1.30201100 |
| H | 0.98533800  | -2.44777400 | -2.31480600 |
| C | 1.53302700  | -1.30381600 | 1.28821300  |
| H | 1.61034100  | -0.99619500 | 2.32287700  |
| C | 2.64684200  | -1.23130400 | 0.40646400  |
| C | 2.42932000  | -1.66942500 | -0.92572100 |
| H | 3.21773700  | -1.64959500 | -1.66605300 |
| N | 3.84126700  | -0.76090300 | 0.81169700  |
| C | 4.94660400  | -0.67237700 | -0.13233100 |
| H | 5.80316500  | -0.22671000 | 0.37068200  |
| H | 4.68112100  | -0.04312500 | -0.98953800 |
| H | 5.23229700  | -1.66460900 | -0.49894300 |
| C | 4.02080100  | -0.30663200 | 2.18375700  |
| H | 5.05031400  | 0.02480900  | 2.31113800  |
| H | 3.82640400  | -1.11629600 | 2.89512600  |
| H | 3.35312800  | 0.53271200  | 2.41220300  |

Zero-point correction= 0.456991 (Hartree/Particle)

Thermal correction to Energy= 0.483888

Thermal correction to Enthalpy= 0.484833

Thermal correction to Gibbs Free Energy= 0.399283

Sum of electronic and zero-point Energies= -1187.463605

Sum of electronic and thermal Energies= -1187.436708

Sum of electronic and thermal Enthalpies= -1187.435764

Sum of electronic and thermal Free Energies= -1187.521313

E(RM062X/6-311+G(2d,p)) = -1188.29755972



**INT1**

|   |             |             |             |
|---|-------------|-------------|-------------|
| C | -2.30759800 | -0.41940500 | -1.13227800 |
| C | -2.30903700 | 1.03147700  | -1.36692500 |
| H | -3.29464600 | 1.47418400  | -1.22238300 |
| H | -1.93019600 | 1.29396400  | -2.35883300 |
| C | -3.17110300 | -1.02237000 | -0.20024500 |
| O | -3.18491200 | -2.22038100 | 0.13673200  |
| O | -4.07525500 | -0.15081100 | 0.37348100  |
| C | -4.96502600 | -0.72347500 | 1.32213200  |
| H | -4.39526400 | -1.19714700 | 2.12956500  |
| H | -5.56677600 | -1.50707500 | 0.84771500  |
| C | -5.84054300 | 0.39360800  | 1.85122900  |
| H | -5.23137400 | 1.16717600  | 2.32844200  |
| H | -6.54717000 | 0.00339700  | 2.58994700  |
| H | -6.40915500 | 0.85589600  | 1.03862700  |
| O | -1.49974800 | 1.83049900  | -0.40091700 |
| C | -0.19806700 | 1.85110800  | -0.61097000 |
| O | 0.38313000  | 1.34572700  | -1.55159900 |
| O | 0.36875700  | 2.54112100  | 0.38658400  |
| C | 1.80239400  | 2.79922300  | 0.39320900  |
| C | 2.19750200  | 3.61717300  | -0.83185400 |
| H | 3.24407000  | 3.92455300  | -0.73944400 |
| H | 1.57985300  | 4.51905700  | -0.89595200 |
| H | 2.08097300  | 3.03965600  | -1.75021500 |
| C | 1.99033000  | 3.61955500  | 1.66364800  |
| H | 1.67189000  | 3.04646100  | 2.53986400  |
| H | 1.40045700  | 4.53994900  | 1.61570900  |
| H | 3.04467700  | 3.88532300  | 1.78324600  |
| C | 2.57423600  | 1.48695300  | 0.48718200  |

|   |             |             |             |
|---|-------------|-------------|-------------|
| H | 2.19861000  | 0.89188000  | 1.32738600  |
| H | 3.63430500  | 1.70054400  | 0.66128400  |
| H | 2.47350700  | 0.90640100  | -0.43135600 |
| C | -1.37269500 | -1.30844400 | -1.84741200 |
| H | -1.08938800 | -0.91616800 | -2.82787100 |
| H | -1.79274200 | -2.31160300 | -1.96531300 |
| N | -0.03269100 | -1.54295200 | -1.15416100 |
| C | -0.00660500 | -1.76841600 | 0.17470600  |
| H | -0.97659300 | -1.81514600 | 0.65807300  |
| C | 1.11997400  | -1.51545400 | -1.84582000 |
| H | 1.03082500  | -1.32950600 | -2.91009300 |
| C | 1.17041300  | -1.94685200 | 0.85404400  |
| H | 1.12685400  | -2.12175100 | 1.92070200  |
| C | 2.41031300  | -1.87998600 | 0.16192700  |
| C | 2.33906900  | -1.69083500 | -1.24391400 |
| H | 3.22898600  | -1.64280800 | -1.85697300 |
| N | 3.58787600  | -1.96735800 | 0.80602900  |
| C | 4.83434800  | -1.83258200 | 0.06514000  |
| H | 5.66757100  | -1.89158700 | 0.76366700  |
| H | 4.88054700  | -0.86725200 | -0.45178200 |
| H | 4.94228300  | -2.63301400 | -0.67498700 |
| C | 3.61674200  | -2.13620300 | 2.25229400  |
| H | 4.65381900  | -2.19061700 | 2.57947000  |
| H | 3.11040600  | -3.06047500 | 2.55010900  |
| H | 3.13370700  | -1.29181000 | 2.75751900  |

Zero-point correction= 0.456961 (Hartree/Particle)

Thermal correction to Energy= 0.484080

Thermal correction to Enthalpy= 0.485024

Thermal correction to Gibbs Free Energy= 0.398042

Sum of electronic and zero-point Energies= -1187.465498

Sum of electronic and thermal Energies= -1187.438379  
Sum of electronic and thermal Enthalpies= -1187.437435  
Sum of electronic and thermal Free Energies= -1187.524417  
E(RM062X/6-311+G(2d,p)) = -1188.30092019

## INT2

|   |             |             |             |
|---|-------------|-------------|-------------|
| C | -0.36104200 | 3.83126100  | -0.80166700 |
| H | -0.93744000 | 4.42567500  | -0.09977100 |
| H | 0.14856800  | 4.35614300  | -1.60570000 |
| C | -0.29052000 | 2.50582700  | -0.69404400 |
| C | -0.95707800 | 1.76026000  | 0.41703000  |
| O | -0.54268600 | 0.69814000  | 0.83459300  |
| O | -2.00796600 | 2.39862700  | 0.92281300  |
| C | -2.81124500 | 1.61931100  | 1.82808000  |
| H | -3.02056700 | 0.66168800  | 1.34177200  |
| H | -2.23979400 | 1.43512700  | 2.74366800  |
| C | -4.06977900 | 2.41086900  | 2.09931200  |
| H | -4.62031700 | 2.57920900  | 1.16956800  |
| H | -3.83504900 | 3.38001200  | 2.54958600  |
| H | -4.71330800 | 1.85587000  | 2.78798100  |
| C | 0.45401800  | 1.64618300  | -1.68037500 |
| H | 0.82931300  | 2.25720300  | -2.50454100 |
| H | -0.21314900 | 0.86870000  | -2.06566500 |
| N | 1.61210300  | 0.95812000  | -1.06837100 |
| C | 2.70739700  | 1.66616700  | -0.71269100 |
| H | 2.67402100  | 2.72950800  | -0.92478800 |
| C | 3.78833400  | 1.07636900  | -0.12121700 |
| H | 4.63766200  | 1.69535300  | 0.13419100  |
| C | 1.55712700  | -0.37192500 | -0.82644000 |
| H | 0.62687600  | -0.85876600 | -1.11847300 |

|   |             |             |             |
|---|-------------|-------------|-------------|
| C | 2.60480000  | -1.03158200 | -0.24300800 |
| H | 2.50621000  | -2.09549700 | -0.07388000 |
| C | 3.77797600  | -0.32511500 | 0.13990100  |
| N | 4.81958500  | -0.94205100 | 0.71614600  |
| C | 5.99513000  | -0.17869700 | 1.11713900  |
| H | 6.71194000  | -0.85569000 | 1.57892500  |
| H | 5.72918100  | 0.59543800  | 1.84447600  |
| H | 6.46967900  | 0.29490000  | 0.25118400  |
| C | 4.77421900  | -2.37965200 | 0.95544500  |
| H | 5.71576300  | -2.69028600 | 1.40443000  |
| H | 4.63779700  | -2.92667100 | 0.01679200  |
| H | 3.95774500  | -2.63816300 | 1.63804300  |
| C | -2.18297400 | -0.50738400 | -1.27208000 |
| O | -2.54762700 | 0.67073400  | -1.42587600 |
| O | -1.26047500 | -1.12490500 | -1.85414300 |
| O | -2.93753800 | -1.18590000 | -0.31267000 |
| C | -2.64419800 | -2.53942000 | 0.05943000  |
| C | -2.93850700 | -3.49218700 | -1.09849100 |
| H | -3.98161500 | -3.38630700 | -1.41711600 |
| H | -2.77871700 | -4.53077700 | -0.78706000 |
| H | -2.28535100 | -3.26754500 | -1.94334200 |
| C | -1.20756500 | -2.69634200 | 0.56547200  |
| H | -0.49972600 | -2.73017100 | -0.26350500 |
| H | -1.11757000 | -3.62039700 | 1.14840300  |
| H | -0.95242500 | -1.84648100 | 1.20740900  |
| C | -3.61619100 | -2.80311900 | 1.20901600  |
| H | -4.64514000 | -2.61591700 | 0.88554000  |
| H | -3.39498100 | -2.14242100 | 2.05462400  |
| H | -3.54048800 | -3.84073200 | 1.55023300  |

Zero-point correction= 0.455286 (Hartree/Particle)

Thermal correction to Energy= 0.483099  
 Thermal correction to Enthalpy= 0.484043  
 Thermal correction to Gibbs Free Energy= 0.395380  
 Sum of electronic and zero-point Energies= -1187.473336  
 Sum of electronic and thermal Energies= -1187.445522  
 Sum of electronic and thermal Enthalpies= -1187.444578  
 Sum of electronic and thermal Free Energies= -1187.533241  
 E(RM062X/6-311+G(2d,p)) = -1188.31031817

**RR-6a-CONF1**

|   |             |             |             |
|---|-------------|-------------|-------------|
| C | 1.79723600  | -2.26379600 | -0.21946200 |
| C | 0.92748700  | -3.30087900 | -0.28827400 |
| H | 1.18712400  | -4.34592900 | -0.19181800 |
| C | -0.40323900 | -2.78400400 | -0.54868200 |
| O | -1.46417100 | -3.36722100 | -0.62423000 |
| C | -0.25287400 | -1.25286400 | -0.81336000 |
| N | 1.16258300  | -1.04056200 | -0.43193700 |
| C | 1.65633700  | 0.24062000  | -0.25200000 |
| O | 1.13888300  | 1.20464300  | -0.78295400 |
| O | 2.69326300  | 0.25595300  | 0.57368500  |
| C | 3.44962200  | 1.48950600  | 0.80807800  |
| C | 2.56075200  | 2.49383700  | 1.53193600  |
| H | 2.16505100  | 2.05401400  | 2.45374200  |
| H | 1.72706900  | 2.80718600  | 0.89960200  |
| H | 3.15582100  | 3.37397200  | 1.79822400  |
| C | 4.58359300  | 1.01416400  | 1.70597700  |
| H | 4.18507700  | 0.57395400  | 2.62497900  |
| H | 5.22427700  | 1.86015200  | 1.97116100  |
| H | 5.18874400  | 0.26107800  | 1.19083600  |
| C | 3.99501000  | 2.03666100  | -0.50595000 |

|   |             |             |             |
|---|-------------|-------------|-------------|
| H | 3.19578900  | 2.38935800  | -1.16078100 |
| H | 4.57396100  | 1.26562100  | -1.02542100 |
| H | 4.66382000  | 2.87538500  | -0.28820800 |
| C | 3.26264900  | -2.39498400 | -0.09259600 |
| C | 6.02353600  | -2.77135900 | 0.06191400  |
| C | 3.80079300  | -3.23577600 | 0.88309800  |
| C | 4.11177600  | -1.74790100 | -0.99865400 |
| C | 5.48578300  | -1.94157000 | -0.92431900 |
| C | 5.18042100  | -3.41559300 | 0.96375400  |
| H | 3.13828400  | -3.73211300 | 1.58622200  |
| H | 3.69082800  | -1.10449300 | -1.76769400 |
| H | 6.13921600  | -1.44554000 | -1.63581000 |
| H | 5.59422400  | -4.06084600 | 1.73246900  |
| H | 7.09784100  | -2.91640100 | 0.12280800  |
| C | -0.47387600 | -0.91504000 | -2.31356000 |
| H | -0.53756800 | 0.17469400  | -2.35271500 |
| C | -1.76355900 | -1.51017700 | -2.88183000 |
| H | -1.64438000 | -2.57738000 | -3.09361500 |
| H | -2.00147400 | -1.00312800 | -3.82279500 |
| H | -2.60998900 | -1.40872000 | -2.20288400 |
| C | 0.71676900  | -1.34097000 | -3.17559700 |
| H | 0.92949800  | -2.41195400 | -3.08215800 |
| H | 1.62234600  | -0.78037000 | -2.92844500 |
| H | 0.47791300  | -1.14156000 | -4.22491100 |
| N | -1.14366400 | -0.48738100 | 0.05853300  |
| C | -1.15331600 | -0.77359800 | 1.41225200  |
| O | -0.47834400 | -1.65072500 | 1.90834100  |
| O | -1.96398000 | 0.05451300  | 2.07543000  |
| C | -2.11244500 | -0.18487600 | 3.49831500  |
| H | -1.13243500 | -0.47186800 | 3.88818200  |

|   |             |             |             |
|---|-------------|-------------|-------------|
| C | -3.11488500 | -1.30526200 | 3.70458400  |
| H | -4.08833800 | -1.01617000 | 3.29418500  |
| H | -3.23363700 | -1.50762900 | 4.77336400  |
| H | -2.77675200 | -2.22180400 | 3.21317200  |
| C | -2.56115500 | 1.13667200  | 4.08793800  |
| H | -1.82227000 | 1.91929500  | 3.89370900  |
| H | -2.68590200 | 1.03451400  | 5.16969600  |
| H | -3.51906000 | 1.44147500  | 3.65412400  |
| N | -2.01266600 | 0.47556200  | -0.41817700 |
| C | -3.37385500 | 0.18987900  | -0.38240200 |
| O | -4.21211900 | 1.04097300  | -0.60046100 |
| O | -3.61808000 | -1.08873800 | -0.10799600 |
| C | -5.00055000 | -1.51925100 | -0.19472800 |
| H | -5.61307700 | -0.75916000 | 0.29889500  |
| C | -5.40427800 | -1.65721900 | -1.65263900 |
| H | -6.45945700 | -1.94052900 | -1.71535800 |
| H | -4.80763700 | -2.43662300 | -2.13815700 |
| H | -5.26958400 | -0.71401800 | -2.18884900 |
| C | -5.05896200 | -2.83612700 | 0.55232400  |
| H | -6.07487200 | -3.23941000 | 0.50932500  |
| H | -4.77909500 | -2.70621900 | 1.60099100  |
| H | -4.37305200 | -3.55499700 | 0.09409300  |
| C | -1.63770500 | 1.88240100  | -0.21302500 |
| H | -2.45393800 | 2.38304000  | 0.31702100  |
| H | -0.76356200 | 1.88908200  | 0.43513000  |
| C | -1.90156400 | 2.33092300  | -2.67173600 |
| H | -1.63918300 | 2.89406800  | -3.56220300 |
| C | -1.33130600 | 2.60955800  | -1.50099100 |
| C | -0.33716600 | 3.72373800  | -1.44854300 |
| O | 0.19952300  | 4.22531300  | -2.41093900 |

|                                              |             |                             |             |
|----------------------------------------------|-------------|-----------------------------|-------------|
| O                                            | -0.12809700 | 4.13831800                  | -0.19043000 |
| C                                            | 0.79469800  | 5.22943500                  | -0.02838900 |
| H                                            | 0.51039800  | 6.03489100                  | -0.71092800 |
| H                                            | 1.79599100  | 4.88433800                  | -0.30811700 |
| C                                            | 0.72594500  | 5.66682800                  | 1.41679800  |
| H                                            | -0.27972100 | 6.01860400                  | 1.66375600  |
| H                                            | 1.43116900  | 6.48533700                  | 1.58656900  |
| H                                            | 0.98120900  | 4.84288400                  | 2.08967600  |
| H                                            | -2.63951000 | 1.53850400                  | -2.76494000 |
| Zero-point correction=                       |             | 0.754442 (Hartree/Particle) |             |
| Thermal correction to Energy=                |             | 0.800986                    |             |
| Thermal correction to Enthalpy=              |             | 0.801930                    |             |
| Thermal correction to Gibbs Free Energy=     |             | 0.673528                    |             |
| Sum of electronic and zero-point Energies=   |             | -2086.253976                |             |
| Sum of electronic and thermal Energies=      |             | -2086.207432                |             |
| Sum of electronic and thermal Enthalpies=    |             | -2086.206488                |             |
| Sum of electronic and thermal Free Energies= |             | -2086.334890                |             |
| E(RM062X/6-311+G(2d,p)) =                    |             | -2087.65806389              |             |

**RR-6a-CONF2**

|   |             |             |             |
|---|-------------|-------------|-------------|
| C | 1.58825200  | -1.98241100 | -0.74762900 |
| C | 0.72246200  | -3.02038600 | -0.86579800 |
| H | 0.99785300  | -4.05971200 | -0.98019200 |
| C | -0.63378200 | -2.50437300 | -0.85439500 |
| O | -1.69193900 | -3.09757300 | -0.85484100 |
| C | -0.52863100 | -0.94685600 | -0.89925800 |
| N | 0.92513600  | -0.75952200 | -0.67659600 |
| C | 1.42480800  | 0.47676900  | -0.30171600 |
| O | 0.85376300  | 1.50978900  | -0.59175000 |
| O | 2.53305400  | 0.35927200  | 0.41670900  |



|   |             |             |             |
|---|-------------|-------------|-------------|
| C | 3.30005000  | 1.54396400  | 0.81484000  |
| C | 2.47343500  | 2.36665400  | 1.79547800  |
| H | 2.16335600  | 1.74571000  | 2.64296500  |
| H | 1.58497900  | 2.77744800  | 1.31076600  |
| H | 3.08404900  | 3.19158000  | 2.17782800  |
| C | 4.51670700  | 0.93444600  | 1.49729400  |
| H | 4.21096000  | 0.32169100  | 2.35092100  |
| H | 5.17604500  | 1.73009100  | 1.85602700  |
| H | 5.07333700  | 0.30516000  | 0.79514100  |
| C | 3.71612500  | 2.34535700  | -0.41318100 |
| H | 2.85571600  | 2.78804800  | -0.91900000 |
| H | 4.25856800  | 1.70495400  | -1.11685900 |
| H | 4.38812900  | 3.14984100  | -0.09803000 |
| C | 3.05747000  | -2.08649500 | -0.83999800 |
| C | 5.81843600  | -2.38625800 | -1.11896800 |
| C | 3.72560800  | -3.09979000 | -0.14945100 |
| C | 3.77669700  | -1.22712600 | -1.67974000 |
| C | 5.15008500  | -1.38212900 | -1.82275900 |
| C | 5.10519800  | -3.24229500 | -0.28364600 |
| H | 3.16564700  | -3.76401100 | 0.50267700  |
| H | 3.25450000  | -0.44759800 | -2.22938400 |
| H | 5.70100000  | -0.71943200 | -2.48341100 |
| H | 5.62082700  | -4.02421300 | 0.26513000  |
| H | 6.89268500  | -2.50141000 | -1.22653600 |
| C | -0.93549900 | -0.39887600 | -2.29700900 |
| H | -1.02013000 | 0.68165000  | -2.16114100 |
| C | -2.27478900 | -0.94743800 | -2.79282400 |
| H | -2.16155600 | -1.96535000 | -3.17967400 |
| H | -2.63522700 | -0.31421900 | -3.61019200 |
| H | -3.03405900 | -0.98203600 | -2.01190200 |

|   |             |             |             |
|---|-------------|-------------|-------------|
| C | 0.14642200  | -0.64960500 | -3.34976700 |
| H | 0.38482700  | -1.71448800 | -3.44925400 |
| H | 1.06650200  | -0.10220300 | -3.12896900 |
| H | -0.22360200 | -0.30159300 | -4.31925700 |
| N | -1.31805100 | -0.33739900 | 0.17393500  |
| C | -1.21647400 | -0.72172000 | 1.50316800  |
| O | -1.87813700 | -0.22586100 | 2.38991000  |
| O | -0.28645400 | -1.66089000 | 1.65566600  |
| C | -0.08888800 | -2.19414200 | 2.98971500  |
| H | -0.11882700 | -1.35092600 | 3.68552100  |
| C | 1.28890100  | -2.82489100 | 2.96435800  |
| H | 1.30612900  | -3.66632600 | 2.26373800  |
| H | 1.54452600  | -3.19608000 | 3.96089700  |
| H | 2.04279400  | -2.09328000 | 2.65747000  |
| C | -1.19632800 | -3.18361500 | 3.30089500  |
| H | -2.16969800 | -2.68708900 | 3.30518000  |
| H | -1.02976900 | -3.63092200 | 4.28551500  |
| H | -1.20606000 | -3.98111700 | 2.55043600  |
| N | -2.24108500 | 0.66341200  | -0.06511000 |
| C | -3.58833900 | 0.34484000  | 0.07794800  |
| O | -4.45132700 | 1.19948400  | 0.07034200  |
| O | -3.79380100 | -0.96382700 | 0.18695300  |
| C | -5.17347500 | -1.40412800 | 0.23614700  |
| H | -5.72692500 | -0.68912700 | 0.85072600  |
| C | -5.74153600 | -1.43903900 | -1.17166900 |
| H | -6.79320000 | -1.73987400 | -1.13889600 |
| H | -5.19212700 | -2.16236400 | -1.78348600 |
| H | -5.68045000 | -0.45274600 | -1.64052700 |
| C | -5.13637000 | -2.76786900 | 0.89504400  |
| H | -6.14808000 | -3.17994500 | 0.95142100  |

|   |             |             |             |
|---|-------------|-------------|-------------|
| H | -4.73109800 | -2.69678100 | 1.90808000  |
| H | -4.50881100 | -3.44894700 | 0.31216200  |
| C | -1.85667300 | 2.02876200  | 0.32567900  |
| H | -2.63014200 | 2.42781200  | 0.98820400  |
| H | -0.93286200 | 1.95361000  | 0.89634600  |
| C | -2.35140600 | 2.86359400  | -1.99084800 |
| H | -2.16767100 | 3.55778200  | -2.80525500 |
| C | -1.66065200 | 2.94990300  | -0.85562600 |
| C | -0.64147400 | 4.03512100  | -0.72978700 |
| O | -0.17315700 | 4.66260300  | -1.65325100 |
| O | -0.32448800 | 4.26566300  | 0.55267500  |
| C | 0.63132300  | 5.31306300  | 0.79126600  |
| H | 0.31497900  | 6.20865200  | 0.24959300  |
| H | 1.60140300  | 4.99845700  | 0.39099100  |
| C | 0.68036300  | 5.54699200  | 2.28378300  |
| H | -0.29606800 | 5.87258700  | 2.65342800  |
| H | 1.41398900  | 6.32612400  | 2.50944900  |
| H | 0.96664400  | 4.63497000  | 2.81571800  |
| H | -3.11333500 | 2.10074800  | -2.12854300 |

Zero-point correction= 0.754380 (Hartree/Particle)

Thermal correction to Energy= 0.800929

Thermal correction to Enthalpy= 0.801873

Thermal correction to Gibbs Free Energy= 0.673902

Sum of electronic and zero-point Energies= -2086.254571

Sum of electronic and thermal Energies= -2086.208023

Sum of electronic and thermal Enthalpies= -2086.207078

Sum of electronic and thermal Free Energies= -2086.335049

E(RM062X/6-311+G(2d,p)) = -2087.65783943

E(RM062X/6-311+G(2d,p)) = -2087.65824516

**RR-INT3**

|   |             |             |             |
|---|-------------|-------------|-------------|
| C | -1.64791800 | -0.69155500 | -1.07358500 |
| H | -1.13695600 | -1.28538100 | -1.82413900 |
| H | -1.17725500 | 0.23113800  | -0.75315400 |
| C | -2.79275700 | -1.10307400 | -0.52538700 |
| C | -3.42177300 | -2.39537700 | -0.89627900 |
| O | -4.39179600 | -2.85801700 | -0.32271800 |
| O | -2.82819600 | -2.99544000 | -1.92656500 |
| C | -3.19686800 | -4.36224800 | -2.15930900 |
| H | -3.19124500 | -4.89079700 | -1.20228400 |
| H | -4.21317700 | -4.39487800 | -2.56570600 |
| C | -2.17606400 | -4.93409900 | -3.11611000 |
| H | -1.17977100 | -4.86153700 | -2.67047800 |
| H | -2.18198600 | -4.38945500 | -4.06506600 |
| H | -2.40182100 | -5.98536900 | -3.31763400 |
| C | -3.46169100 | -0.33827600 | 0.58450700  |
| H | -2.72107400 | 0.24511400  | 1.13322100  |
| H | -3.98293100 | -1.01393600 | 1.26231500  |
| N | -4.45925300 | 0.62473400  | 0.05551000  |
| C | -4.10832400 | 1.91630000  | -0.13675900 |
| H | -3.10133000 | 2.18037200  | 0.17417300  |
| C | -4.97532200 | 2.82239700  | -0.68367100 |
| H | -4.63915200 | 3.84314200  | -0.80605400 |
| C | -5.69174800 | 0.20021300  | -0.30449600 |
| H | -5.89299300 | -0.85222000 | -0.13333400 |
| C | -6.61258500 | 1.04737700  | -0.85564100 |
| H | -7.58372300 | 0.64927400  | -1.11667200 |
| C | -6.28290400 | 2.41597700  | -1.07383200 |
| N | -7.15736800 | 3.27382500  | -1.61741400 |

|   |             |             |             |
|---|-------------|-------------|-------------|
| C | -6.78223900 | 4.66708300  | -1.82689400 |
| H | -7.62635300 | 5.19458800  | -2.26750300 |
| H | -5.92718000 | 4.74385000  | -2.50674800 |
| H | -6.52553700 | 5.14937400  | -0.87795300 |
| C | -8.48275600 | 2.81398500  | -2.01470300 |
| H | -9.03165400 | 3.65225500  | -2.43970000 |
| H | -9.03905400 | 2.43263700  | -1.15209800 |
| H | -8.41199800 | 2.02343200  | -2.76914200 |
| N | -0.01023600 | -0.79296000 | 1.35900800  |
| N | 0.72756100  | 0.39316500  | 1.55910800  |
| C | 0.11150800  | 1.58051400  | 1.30713500  |
| O | -1.08692100 | 1.73192100  | 1.10653600  |
| O | 0.99053400  | 2.60120400  | 1.30476200  |
| C | 0.48002000  | 3.92136100  | 1.03395000  |
| H | -0.48605800 | 4.01737200  | 1.53713400  |
| C | 1.48995400  | 4.88251300  | 1.63034100  |
| H | 2.45589800  | 4.78344600  | 1.12417500  |
| H | 1.63065100  | 4.68018600  | 2.69605400  |
| H | 1.13954100  | 5.91201300  | 1.51121200  |
| C | 0.31625100  | 4.08769100  | -0.46704000 |
| H | 1.27792300  | 3.91751500  | -0.96395600 |
| H | -0.03002900 | 5.09888000  | -0.70312100 |
| H | -0.41202600 | 3.36862200  | -0.85271900 |
| C | -0.89287700 | -1.05333200 | 2.29639500  |
| O | -1.63791200 | -2.07814000 | 2.25583200  |
| O | -1.04492200 | -0.17655000 | 3.32782400  |
| C | -1.98082300 | -0.51893300 | 4.35875200  |
| H | -2.86816300 | -0.95472700 | 3.88991100  |
| C | -2.33468700 | 0.78974300  | 5.04185300  |
| H | -1.44024900 | 1.23974100  | 5.48549700  |

|   |             |             |             |
|---|-------------|-------------|-------------|
| H | -3.06845000 | 0.61883800  | 5.83559500  |
| H | -2.75546400 | 1.49673300  | 4.32020700  |
| C | -1.35833300 | -1.52800000 | 5.31091800  |
| H | -0.47069100 | -1.09783600 | 5.78800900  |
| H | -1.06756900 | -2.42998300 | 4.76612500  |
| H | -2.07168100 | -1.80649200 | 6.09381600  |
| C | 2.17956500  | 0.30077000  | 1.58524400  |
| C | 2.61889400  | -1.14148200 | 1.94920000  |
| H | 2.07609100  | -1.77956100 | 1.24860700  |
| C | 2.19400200  | -1.52574000 | 3.37088700  |
| H | 2.08198600  | -2.61299300 | 3.42228800  |
| H | 1.24746400  | -1.06419300 | 3.65971800  |
| H | 2.94680500  | -1.21676100 | 4.10406000  |
| C | 4.11985000  | -1.37551700 | 1.77464600  |
| H | 4.71711700  | -0.74804800 | 2.44633500  |
| H | 4.45418300  | -1.19985800 | 0.74700900  |
| H | 4.34067100  | -2.41934300 | 2.02282600  |
| C | 2.82302000  | 1.30360800  | 2.58732200  |
| O | 2.49669500  | 1.39594700  | 3.75278200  |
| C | 3.90403400  | 1.97488000  | 1.88282900  |
| H | 4.65251600  | 2.60578400  | 2.34281400  |
| C | 3.85902300  | 1.62631600  | 0.57462900  |
| N | 2.82455700  | 0.72936800  | 0.30446300  |
| C | 2.19936900  | 0.53442200  | -0.92004400 |
| O | 1.45408000  | -0.39547700 | -1.13906300 |
| O | 2.51179600  | 1.51067600  | -1.77593000 |
| C | 2.20997600  | 1.39196900  | -3.20113800 |
| C | 2.89596300  | 2.62081800  | -3.78464400 |
| H | 2.47977000  | 3.53519600  | -3.34977100 |
| H | 2.74715100  | 2.65036800  | -4.86803400 |

|   |             |             |             |
|---|-------------|-------------|-------------|
| H | 3.97095600  | 2.59194000  | -3.57678000 |
| C | 2.81924600  | 0.11701100  | -3.77422300 |
| H | 2.34728800  | -0.77569700 | -3.35915900 |
| H | 3.89486300  | 0.08553000  | -3.57290100 |
| H | 2.67486900  | 0.11298800  | -4.85923500 |
| C | 0.70311300  | 1.45473300  | -3.41912000 |
| H | 0.20895000  | 0.56965400  | -3.01448700 |
| H | 0.49698400  | 1.51359300  | -4.49278800 |
| H | 0.28895100  | 2.34799900  | -2.94062900 |
| C | 4.87121900  | 1.99237400  | -0.43585000 |
| C | 6.88306900  | 2.66050600  | -2.25493400 |
| C | 5.37519500  | 3.29403200  | -0.47837600 |
| C | 5.38404500  | 1.02274200  | -1.30606000 |
| C | 6.38985800  | 1.35510600  | -2.20599100 |
| C | 6.37347100  | 3.62748800  | -1.39145400 |
| H | 4.97368800  | 4.04643700  | 0.19466100  |
| H | 4.99775500  | 0.00671800  | -1.26816300 |
| H | 6.78974700  | 0.59565200  | -2.87133900 |
| H | 6.75236200  | 4.64427700  | -1.42648200 |
| H | 7.66442000  | 2.92006400  | -2.96271500 |
| C | 0.25992500  | -3.88751300 | 0.30582500  |
| O | 1.01324300  | -3.89546900 | 1.26106800  |
| O | -1.00672900 | -3.55509900 | 0.31688900  |
| H | -1.22074400 | -2.97638600 | 1.15893800  |
| O | 0.60436300  | -4.26204000 | -0.94216200 |
| C | 1.95441200  | -4.71644300 | -1.22269400 |
| C | 2.98615000  | -3.65610300 | -0.83771800 |
| H | 2.64978500  | -2.66706100 | -1.16994200 |
| H | 3.93884500  | -3.88587900 | -1.32721000 |
| H | 3.14076600  | -3.62719100 | 0.24109700  |

|   |            |             |             |
|---|------------|-------------|-------------|
| C | 2.20967800 | -6.04489800 | -0.51801000 |
| H | 2.18284300 | -5.92026700 | 0.56620800  |
| H | 3.19412900 | -6.43018600 | -0.80340100 |
| H | 1.45325000 | -6.78014400 | -0.81228000 |
| C | 1.93970100 | -4.90836100 | -2.73544400 |
| H | 1.72019200 | -3.96022800 | -3.23756600 |
| H | 1.17792800 | -5.64015100 | -3.02276500 |
| H | 2.91423800 | -5.26907300 | -3.07781000 |

Zero-point correction= 1.075169 (Hartree/Particle)

Thermal correction to Energy= 1.141591

Thermal correction to Enthalpy= 1.142536

Thermal correction to Gibbs Free Energy= 0.970673

Sum of electronic and zero-point Energies= -2890.116302

Sum of electronic and thermal Energies= -2890.049880

Sum of electronic and thermal Enthalpies= -2890.048935

Sum of electronic and thermal Free Energies= -2890.220798

E(RM062X/6-311+G(2d,p)) = -2892.09845441

#### **RR-INT4-CONF1**

|   |             |             |             |
|---|-------------|-------------|-------------|
| C | -1.36850200 | 0.49659900  | 0.04235400  |
| H | -0.85641300 | -0.44714300 | 0.23293600  |
| H | -1.63315500 | 0.53983200  | -1.02424500 |
| C | -2.57543700 | 0.63631300  | 0.89991100  |
| C | -2.73922700 | -0.00431500 | 2.12864300  |
| O | -3.77598700 | -0.00839200 | 2.82514600  |
| O | -1.63002800 | -0.70835100 | 2.57685600  |
| C | -1.85987500 | -1.54854900 | 3.69745200  |
| H | -2.19603400 | -0.95395600 | 4.55401100  |
| H | -2.65910300 | -2.26426600 | 3.46850200  |
| C | -0.56201100 | -2.26517900 | 4.00627700  |



|   |             |             |             |
|---|-------------|-------------|-------------|
| H | 0.21188000  | -1.55047600 | 4.30004800  |
| H | -0.20821100 | -2.81472200 | 3.12832500  |
| H | -0.70565200 | -2.97370600 | 4.82815800  |
| C | -3.78069800 | 1.35035900  | 0.42196400  |
| H | -3.57962400 | 1.93728400  | -0.47361500 |
| H | -4.23801000 | 2.00503500  | 1.17171900  |
| N | -4.90983800 | 0.40614100  | 0.04215500  |
| C | -4.84755600 | -0.26485500 | -1.12622000 |
| H | -3.99662100 | -0.03180100 | -1.75761800 |
| C | -5.79464200 | -1.18097200 | -1.49490900 |
| H | -5.69059800 | -1.67587800 | -2.45118000 |
| C | -5.92334600 | 0.16097500  | 0.89332100  |
| H | -5.89234000 | 0.71052800  | 1.82476500  |
| C | -6.91288500 | -0.74595500 | 0.60152900  |
| H | -7.69959000 | -0.89834000 | 1.32816200  |
| C | -6.88493200 | -1.46112400 | -0.62335900 |
| N | -7.83576100 | -2.35638200 | -0.94700700 |
| C | -7.76098500 | -3.07956300 | -2.20869500 |
| H | -8.61457200 | -3.75187300 | -2.27819600 |
| H | -6.84306300 | -3.67462400 | -2.26819100 |
| H | -7.79001700 | -2.39079100 | -3.06010800 |
| C | -8.93032500 | -2.62026000 | -0.02388500 |
| H | -9.59234000 | -3.36246200 | -0.46716900 |
| H | -9.50793700 | -1.70994400 | 0.17064500  |
| H | -8.55631700 | -3.00965100 | 0.92951900  |
| N | -0.27002500 | 1.51463300  | 0.24116200  |
| N | 1.01459100  | 1.12398000  | -0.12361000 |
| C | 1.40871800  | 1.28571700  | -1.43702200 |
| O | 2.55472700  | 1.15003200  | -1.81518500 |
| O | 0.36780000  | 1.57694000  | -2.22574200 |

|   |             |            |             |
|---|-------------|------------|-------------|
| C | 0.66064600  | 1.84374400 | -3.61751500 |
| H | 1.41692200  | 1.12380000 | -3.94217100 |
| C | -0.64564200 | 1.62075500 | -4.35300800 |
| H | -1.41148900 | 2.30950400 | -3.98106100 |
| H | -0.99787700 | 0.59443000 | -4.21390100 |
| H | -0.50499600 | 1.80002100 | -5.42274400 |
| C | 1.18763100  | 3.26084000 | -3.75110400 |
| H | 0.44001000  | 3.97374700 | -3.38623600 |
| H | 1.39956700  | 3.48440100 | -4.80117600 |
| H | 2.10972700  | 3.38316000 | -3.17691300 |
| C | -0.56980100 | 2.84618800 | -0.00180600 |
| O | -1.69959800 | 3.27684900 | -0.12260300 |
| O | 0.53227800  | 3.60456500 | -0.06558900 |
| C | 0.33590000  | 5.03373000 | -0.10814000 |
| H | -0.48034600 | 5.24084400 | -0.80697500 |
| C | 1.64243900  | 5.61360500 | -0.61301000 |
| H | 2.45890400  | 5.32744700 | 0.05618500  |
| H | 1.57448600  | 6.70512700 | -0.64813000 |
| H | 1.87143300  | 5.24663600 | -1.61721900 |
| C | -0.02475500 | 5.53252000 | 1.28141600  |
| H | 0.79498100  | 5.32282600 | 1.97682700  |
| H | -0.93479000 | 5.04724300 | 1.64457100  |
| H | -0.19427400 | 6.61363200 | 1.25911000  |
| C | 2.03964900  | 0.77709200 | 0.86670000  |
| C | 1.43218900  | 0.65096700 | 2.28879600  |
| H | 0.49931900  | 0.09101700 | 2.16238600  |
| C | 1.11521500  | 2.00032700 | 2.94267700  |
| H | 0.40633700  | 1.82951400 | 3.76002500  |
| H | 0.67871000  | 2.71885300 | 2.24935000  |
| H | 2.01828600  | 2.45371600 | 3.36413500  |

|   |            |             |             |
|---|------------|-------------|-------------|
| C | 2.35452600 | -0.15047500 | 3.21262800  |
| H | 3.36883300 | 0.26556800  | 3.23413100  |
| H | 2.41570600 | -1.20264600 | 2.92093400  |
| H | 1.96429900 | -0.10408400 | 4.23411800  |
| C | 3.24553100 | 1.77485800  | 0.84996800  |
| O | 3.13578300 | 2.96665800  | 1.05205400  |
| C | 4.45015900 | 0.99288300  | 0.64864400  |
| H | 5.45993300 | 1.37328800  | 0.71662100  |
| C | 4.10265300 | -0.29572300 | 0.42009300  |
| N | 2.72301800 | -0.48380500 | 0.47324100  |
| C | 2.00899400 | -1.54427400 | -0.07032900 |
| O | 0.87547800 | -1.80605800 | 0.27193700  |
| O | 2.71852300 | -2.17309300 | -1.00079500 |
| C | 2.22725500 | -3.39841300 | -1.62928400 |
| C | 3.39799100 | -3.80125300 | -2.51655200 |
| H | 3.61878100 | -3.01120500 | -3.24073400 |
| H | 3.15388700 | -4.71857200 | -3.06011000 |
| H | 4.29158100 | -3.97860700 | -1.90861100 |
| C | 1.95893700 | -4.46992600 | -0.57883300 |
| H | 1.13073700 | -4.19458300 | 0.07627800  |
| H | 2.85671800 | -4.63961100 | 0.02478200  |
| H | 1.70653300 | -5.40670700 | -1.08567600 |
| C | 0.99373800 | -3.07516300 | -2.46478500 |
| H | 0.14474300 | -2.80931400 | -1.83237100 |
| H | 0.72548800 | -3.94909200 | -3.06682700 |
| H | 1.20916700 | -2.24169900 | -3.14214400 |
| C | 5.04850700 | -1.42068800 | 0.28829400  |
| C | 6.91140700 | -3.49413600 | 0.11558900  |
| C | 6.20380200 | -1.26395800 | -0.48065900 |
| C | 4.83272100 | -2.61988600 | 0.97812400  |

|                                              |            |             |                             |
|----------------------------------------------|------------|-------------|-----------------------------|
| C                                            | 5.76327000 | -3.64895100 | 0.89500700                  |
| C                                            | 7.12888200 | -2.30178600 | -0.57076800                 |
| H                                            | 6.36360800 | -0.33641500 | -1.02269500                 |
| H                                            | 3.93979900 | -2.74054000 | 1.58696200                  |
| H                                            | 5.59362000 | -4.57344400 | 1.43888500                  |
| H                                            | 8.01876600 | -2.17726800 | -1.18000700                 |
| H                                            | 7.63405600 | -4.30160400 | 0.04668300                  |
| Zero-point correction=                       |            |             | 0.922339 (Hartree/Particle) |
| Thermal correction to Energy=                |            |             | 0.978264                    |
| Thermal correction to Enthalpy=              |            |             | 0.979208                    |
| Thermal correction to Gibbs Free Energy=     |            |             | 0.828539                    |
| Sum of electronic and zero-point Energies=   |            |             | -2468.170458                |
| Sum of electronic and thermal Energies=      |            |             | -2468.114533                |
| Sum of electronic and thermal Enthalpies=    |            |             | -2468.113589                |
| Sum of electronic and thermal Free Energies= |            |             | -2468.264257                |
| E(RM062X/6-311+G(2d,p)) = -2469.85495422     |            |             |                             |

**RR-INT4-CONF2**

|   |             |             |             |
|---|-------------|-------------|-------------|
| C | 1.17469300  | -0.54101100 | 0.07018200  |
| H | 0.56263000  | 0.31944300  | 0.34143000  |
| H | 1.37553400  | -0.49444400 | -1.00964800 |
| C | 2.44167800  | -0.55797700 | 0.84202000  |
| C | 2.57353100  | -0.07178900 | 2.14194000  |
| O | 3.63904900  | 0.02928400  | 2.78580000  |
| O | 1.38735400  | 0.33619900  | 2.73283200  |
| C | 1.53523000  | 1.05488300  | 3.94806000  |
| H | 2.11316000  | 0.46528300  | 4.66697300  |
| H | 2.09369000  | 1.98249000  | 3.76681700  |
| C | 0.14724000  | 1.35096800  | 4.47452200  |
| H | -0.37221000 | 0.42067300  | 4.72260400  |

|   |             |             |             |
|---|-------------|-------------|-------------|
| H | -0.44197100 | 1.88727600  | 3.72352800  |
| H | 0.20498600  | 1.96489600  | 5.37888400  |
| C | 3.70630800  | -1.02377200 | 0.23447400  |
| H | 3.54452200  | -1.52893800 | -0.72023900 |
| H | 4.29594000  | -1.68288500 | 0.88164100  |
| N | 4.66560800  | 0.11501100  | -0.07023300 |
| C | 4.43369300  | 0.91745900  | -1.12936600 |
| H | 3.58325400  | 0.64785800  | -1.74670800 |
| C | 5.21612700  | 2.00469500  | -1.40757300 |
| H | 4.98015400  | 2.60160800  | -2.27834400 |
| C | 5.68547100  | 0.39520300  | 0.76256000  |
| H | 5.79171900  | -0.26934800 | 1.60987100  |
| C | 6.51463300  | 1.47065000  | 0.55870100  |
| H | 7.31535200  | 1.64211800  | 1.26537400  |
| C | 6.30650000  | 2.32979200  | -0.55112400 |
| N | 7.09292800  | 3.39601200  | -0.78298100 |
| C | 6.84297600  | 4.25348100  | -1.93322500 |
| H | 7.59275100  | 5.04279800  | -1.95215600 |
| H | 5.85109800  | 4.71492800  | -1.87363100 |
| H | 6.91301200  | 3.68672600  | -2.86778000 |
| C | 8.17856000  | 3.71207700  | 0.13469100  |
| H | 8.67915900  | 4.61541500  | -0.21013100 |
| H | 8.91167300  | 2.89879600  | 0.17159500  |
| H | 7.79785700  | 3.88892100  | 1.14645300  |
| N | 0.20073200  | -1.68798700 | 0.26519800  |
| N | -1.10079300 | -1.41450400 | -0.14646000 |
| C | -1.43450000 | -1.60893500 | -1.47243900 |
| O | -2.57447200 | -1.54909600 | -1.88695500 |
| O | -0.35683900 | -1.83741400 | -2.23392700 |
| C | -0.58947300 | -1.90216000 | -3.66246200 |

|   |             |             |             |
|---|-------------|-------------|-------------|
| H | -1.49537500 | -2.49178100 | -3.82514100 |
| C | -0.77283700 | -0.49431900 | -4.20297300 |
| H | 0.12237300  | 0.10479500  | -4.00305200 |
| H | -1.63748900 | -0.01208300 | -3.73941800 |
| H | -0.93438700 | -0.52832800 | -5.28465100 |
| C | 0.62000200  | -2.60564800 | -4.24386300 |
| H | 1.53410400  | -2.04985600 | -4.00803100 |
| H | 0.52226400  | -2.66802500 | -5.33153800 |
| H | 0.71124300  | -3.61877500 | -3.84422500 |
| C | 0.54266200  | -3.01923100 | 0.05763600  |
| O | -0.26571000 | -3.91431300 | -0.07981500 |
| O | 1.86846700  | -3.20420800 | 0.05219500  |
| C | 2.31443200  | -4.57470300 | -0.08401100 |
| H | 1.64944200  | -5.20011700 | 0.51733900  |
| C | 3.72470900  | -4.61561900 | 0.47093400  |
| H | 4.39864500  | -4.00355000 | -0.13750800 |
| H | 4.09272500  | -5.64593800 | 0.46076800  |
| H | 3.74662800  | -4.24764500 | 1.50069700  |
| C | 2.24127300  | -4.98837800 | -1.54331200 |
| H | 2.86231000  | -4.32308600 | -2.15373500 |
| H | 1.21002700  | -4.94451700 | -1.90104300 |
| H | 2.60952100  | -6.01224400 | -1.66218000 |
| C | -2.19557500 | -1.16318600 | 0.79816000  |
| C | -1.67658600 | -1.06905000 | 2.25681000  |
| H | -0.76441200 | -0.46481600 | 2.20982700  |
| C | -1.33482200 | -2.43510500 | 2.86222500  |
| H | -0.64834100 | -2.28226400 | 3.70208300  |
| H | -0.87175800 | -3.11572700 | 2.14708700  |
| H | -2.23457000 | -2.92852400 | 3.24446300  |
| C | -2.68927700 | -0.34909400 | 3.15264400  |

|   |             |             |             |
|---|-------------|-------------|-------------|
| H | -3.68671300 | -0.79865400 | 3.07930000  |
| H | -2.76748800 | 0.71446400  | 2.90944800  |
| H | -2.37219900 | -0.43404200 | 4.19624800  |
| C | -3.33507500 | -2.22915600 | 0.66660500  |
| O | -3.15821400 | -3.41954100 | 0.80967500  |
| C | -4.57426600 | -1.51108900 | 0.43238700  |
| H | -5.56055100 | -1.95361100 | 0.41479700  |
| C | -4.29517600 | -0.19615800 | 0.27876300  |
| N | -2.93436400 | 0.06891700  | 0.41580600  |
| C | -2.27208500 | 1.24449700  | 0.09610100  |
| O | -1.20639700 | 1.54638300  | 0.59186900  |
| O | -2.94057500 | 1.94023200  | -0.81849600 |
| C | -2.54364400 | 3.30367500  | -1.17298300 |
| C | -3.65646900 | 3.72952400  | -2.12159100 |
| H | -3.69425300 | 3.06456400  | -2.98996100 |
| H | -3.47836100 | 4.75139600  | -2.46897500 |
| H | -4.62473600 | 3.69373700  | -1.61096300 |
| C | -2.52215800 | 4.19594600  | 0.06296400  |
| H | -1.74986300 | 3.88717800  | 0.76978400  |
| H | -3.49691900 | 4.17863100  | 0.56065000  |
| H | -2.31697700 | 5.22491200  | -0.24887200 |
| C | -1.19762200 | 3.27466200  | -1.88765600 |
| H | -0.39577500 | 2.97582000  | -1.21014800 |
| H | -0.97659800 | 4.27348800  | -2.27735000 |
| H | -1.23304600 | 2.57747100  | -2.73080900 |
| C | -5.30845300 | 0.86963500  | 0.13995200  |
| C | -7.31333700 | 2.80403000  | -0.04121500 |
| C | -6.34337700 | 0.72149900  | -0.78522700 |
| C | -5.28433400 | 1.98754500  | 0.98187300  |
| C | -6.28663200 | 2.94684200  | 0.89434500  |

|                                              |             |                             |             |
|----------------------------------------------|-------------|-----------------------------|-------------|
| C                                            | -7.33870100 | 1.69223000                  | -0.87985500 |
| H                                            | -6.35485500 | -0.14512500                 | -1.43978300 |
| H                                            | -4.48473300 | 2.09678000                  | 1.71109000  |
| H                                            | -6.26807300 | 3.80733300                  | 1.55667900  |
| H                                            | -8.13412600 | 1.57724600                  | -1.60977000 |
| H                                            | -8.09201200 | 3.55743200                  | -0.11242000 |
| Zero-point correction=                       |             | 0.922383 (Hartree/Particle) |             |
| Thermal correction to Energy=                |             | 0.978308                    |             |
| Thermal correction to Enthalpy=              |             | 0.979253                    |             |
| Thermal correction to Gibbs Free Energy=     |             | 0.828922                    |             |
| Sum of electronic and zero-point Energies=   |             | -2468.166437                |             |
| Sum of electronic and thermal Energies=      |             | -2468.110512                |             |
| Sum of electronic and thermal Enthalpies=    |             | -2468.109567                |             |
| Sum of electronic and thermal Free Energies= |             | -2468.259897                |             |
| E(RM062X/6-311+G(2d,p)) =                    |             | -2469.85153773              |             |

### **RR-TS3**

|   |            |             |             |
|---|------------|-------------|-------------|
| C | 1.77682000 | -0.15424400 | -1.33915900 |
| H | 1.55096100 | 0.47584400  | -2.19322500 |
| H | 1.02772800 | -0.87031200 | -1.01707500 |
| C | 2.92463300 | -0.02947400 | -0.67025800 |
| C | 3.93527800 | 1.00134200  | -1.02337600 |
| O | 4.92977200 | 1.22216800  | -0.35744100 |
| O | 3.64498900 | 1.65975300  | -2.14510200 |
| C | 4.36848200 | 2.88014100  | -2.36366900 |
| H | 4.30679900 | 3.48524500  | -1.45415600 |
| H | 5.41993100 | 2.64432300  | -2.55661300 |
| C | 3.71497800 | 3.57864700  | -3.53318300 |
| H | 2.67509600 | 3.81233100  | -3.29067300 |
| H | 3.74390900 | 2.95009900  | -4.42840900 |



|   |             |             |             |
|---|-------------|-------------|-------------|
| H | 4.24314600  | 4.51215900  | -3.74942000 |
| C | 3.22027300  | -0.85611800 | 0.55263100  |
| H | 2.29004000  | -1.11318300 | 1.06047200  |
| H | 3.88288400  | -0.32054300 | 1.23143900  |
| N | 3.87730100  | -2.13678200 | 0.19251900  |
| C | 3.14812600  | -3.27292100 | 0.12303400  |
| H | 2.09860400  | -3.17506500 | 0.38630300  |
| C | 3.70843800  | -4.46334000 | -0.25318100 |
| H | 3.07543100  | -5.33983200 | -0.28447600 |
| C | 5.19148400  | -2.15803400 | -0.12635400 |
| H | 5.70557000  | -1.20472600 | -0.05728600 |
| C | 5.82079400  | -3.30873800 | -0.51192800 |
| H | 6.87580900  | -3.26363500 | -0.74599200 |
| C | 5.08961900  | -4.52902500 | -0.59107500 |
| N | 5.67182400  | -5.67757000 | -0.96252900 |
| C | 4.89322200  | -6.90940400 | -1.00894300 |
| H | 5.54968900  | -7.72877600 | -1.29631200 |
| H | 4.08395600  | -6.83417800 | -1.74309600 |
| H | 4.46293200  | -7.13535200 | -0.02784700 |
| C | 7.08602300  | -5.70059300 | -1.31698400 |
| H | 7.35439000  | -6.71061400 | -1.62162700 |
| H | 7.70878000  | -5.41412600 | -0.46283000 |
| H | 7.29021900  | -5.01978000 | -2.14963400 |
| N | 0.08620100  | 0.74601400  | 0.96639600  |
| N | -1.00743600 | -0.09725100 | 1.24056900  |
| C | -0.80942000 | -1.43983600 | 1.17433300  |
| O | 0.26858300  | -1.99463300 | 0.99634100  |
| O | -1.96380300 | -2.11751200 | 1.33356000  |
| C | -1.91296900 | -3.55376100 | 1.23862200  |
| H | -1.00644000 | -3.89261400 | 1.74784500  |

|   |             |             |             |
|---|-------------|-------------|-------------|
| C | -3.14930400 | -4.05643200 | 1.95870600  |
| H | -4.05421200 | -3.71406600 | 1.44556300  |
| H | -3.17070900 | -3.68984100 | 2.98907700  |
| H | -3.15217200 | -5.15037500 | 1.97451500  |
| C | -1.87950700 | -3.95106500 | -0.22730300 |
| H | -2.75672100 | -3.53904000 | -0.73875700 |
| H | -1.88935400 | -5.04099200 | -0.32822200 |
| H | -0.97643500 | -3.56235000 | -0.70621800 |
| C | 0.98927400  | 0.81459100  | 1.93988500  |
| O | 2.01919900  | 1.50562900  | 1.82652200  |
| O | 0.76863200  | 0.06673600  | 3.06666700  |
| C | 1.71408800  | 0.20671100  | 4.13069000  |
| H | 2.71944400  | 0.24819900  | 3.69914300  |
| C | 1.55686400  | -1.03691700 | 4.98760600  |
| H | 0.53796000  | -1.09372500 | 5.38562800  |
| H | 2.25860500  | -1.01568100 | 5.82726300  |
| H | 1.74555200  | -1.93725800 | 4.39447900  |
| C | 1.44199800  | 1.48831500  | 4.90385600  |
| H | 0.43959900  | 1.45562000  | 5.34555000  |
| H | 1.50805300  | 2.35006800  | 4.23423400  |
| H | 2.17233000  | 1.61359300  | 5.71043900  |
| C | -2.35249700 | 0.45982900  | 1.30185200  |
| C | -2.28982700 | 2.00858200  | 1.39763800  |
| H | -1.59766700 | 2.29621200  | 0.60371400  |
| C | -1.71899400 | 2.47650800  | 2.74167100  |
| H | -1.25507600 | 3.45883000  | 2.61174500  |
| H | -0.97241900 | 1.78607000  | 3.13688400  |
| H | -2.51303700 | 2.56349800  | 3.49142400  |
| C | -3.63855600 | 2.68175500  | 1.14157500  |
| H | -4.39215400 | 2.38857500  | 1.88123200  |

|   |             |             |             |
|---|-------------|-------------|-------------|
| H | -4.02825100 | 2.46452300  | 0.14281900  |
| H | -3.50652300 | 3.76607100  | 1.21945600  |
| C | -3.17506500 | -0.11401900 | 2.49410100  |
| O | -2.77911600 | -0.12748200 | 3.64118900  |
| C | -4.46608600 | -0.52228300 | 1.96520400  |
| H | -5.32206900 | -0.81530900 | 2.55782300  |
| C | -4.43504900 | -0.42961900 | 0.61362100  |
| N | -3.21107100 | 0.04926100  | 0.14846600  |
| C | -2.67179300 | -0.12065900 | -1.11870000 |
| O | -1.71406400 | 0.50838100  | -1.51008000 |
| O | -3.32593800 | -1.06596100 | -1.79831400 |
| C | -3.11863200 | -1.23920300 | -3.23531200 |
| C | -4.14996700 | -2.30246800 | -3.59072900 |
| H | -3.94885000 | -3.23055200 | -3.04595900 |
| H | -4.11198500 | -2.51265800 | -4.66367800 |
| H | -5.15708800 | -1.95685200 | -3.33457800 |
| C | -3.41420400 | 0.06128400  | -3.97432700 |
| H | -2.71173700 | 0.84890900  | -3.69506100 |
| H | -4.43514600 | 0.39504200  | -3.76330600 |
| H | -3.32821200 | -0.11476700 | -5.05121100 |
| C | -1.70550400 | -1.74338400 | -3.50401200 |
| H | -0.96197800 | -0.97751000 | -3.27777200 |
| H | -1.61866500 | -2.01926600 | -4.55998800 |
| H | -1.50027600 | -2.63255700 | -2.89930400 |
| C | -5.59570300 | -0.64713400 | -0.27275600 |
| C | -7.87525200 | -0.99937200 | -1.84886100 |
| C | -6.44668300 | -1.73095700 | -0.04515500 |
| C | -5.89554100 | 0.26578400  | -1.29093300 |
| C | -7.03363800 | 0.09279000  | -2.06995500 |
| C | -7.57907000 | -1.90958500 | -0.83705000 |

|   |             |             |             |
|---|-------------|-------------|-------------|
| H | -6.21208600 | -2.43928900 | 0.74443200  |
| H | -5.23895700 | 1.11518900  | -1.46350600 |
| H | -7.26477100 | 0.80999900  | -2.85195500 |
| H | -8.22957300 | -2.76079900 | -0.66115500 |
| H | -8.76024000 | -1.13642200 | -2.46278300 |
| C | 1.34656000  | 4.10178900  | -0.14859500 |
| O | 0.69106900  | 4.39417000  | 0.82813100  |
| O | 1.57681700  | 2.87868700  | -0.59236800 |
| H | 1.26508500  | 2.22615300  | 0.08569100  |
| O | 1.95451900  | 4.96195200  | -0.97717900 |
| C | 1.87161700  | 6.39594500  | -0.74048600 |
| C | 0.42351700  | 6.86470600  | -0.83707200 |
| H | -0.01444300 | 6.53711700  | -1.78572200 |
| H | 0.39443200  | 7.95854700  | -0.80483800 |
| H | -0.17581700 | 6.47282600  | -0.01399100 |
| C | 2.50751900  | 6.74665700  | 0.60090300  |
| H | 1.91783400  | 6.36089800  | 1.43357700  |
| H | 2.57970500  | 7.83504500  | 0.69347600  |
| H | 3.51843700  | 6.32919100  | 0.65662400  |
| C | 2.69588200  | 6.97349400  | -1.88505300 |
| H | 2.26601200  | 6.68737800  | -2.85017000 |
| H | 3.72627500  | 6.60655700  | -1.83669400 |
| H | 2.71151800  | 8.06541000  | -1.81977400 |

Zero-point correction= 1.075062 (Hartree/Particle)

Thermal correction to Energy= 1.141446

Thermal correction to Enthalpy= 1.142390

Thermal correction to Gibbs Free Energy= 0.969303

Sum of electronic and zero-point Energies= -2890.108989

Sum of electronic and thermal Energies= -2890.042605

Sum of electronic and thermal Enthalpies= -2890.041661

Sum of electronic and thermal Free Energies= -2890.214748

E(RM062X/6-311+G(2d,p)) = -2892.09019114

**RR-TS4-CONF1**

|   |             |            |             |
|---|-------------|------------|-------------|
| C | 0.02035100  | 1.58509300 | -0.60276700 |
| H | -0.45324600 | 1.19341000 | -1.49348900 |
| H | 0.93404900  | 1.07006500 | -0.31321700 |
| C | -0.12247000 | 2.92456200 | -0.29828700 |
| C | -1.09813900 | 3.77279900 | -0.94160300 |
| O | -1.27370500 | 4.96442100 | -0.69456900 |
| O | -1.80896400 | 3.14576700 | -1.90724600 |
| C | -2.86420100 | 3.90027500 | -2.50218500 |
| H | -3.60869700 | 4.14041000 | -1.73506100 |
| H | -2.46451000 | 4.84376400 | -2.88800600 |
| C | -3.46303900 | 3.05553100 | -3.60549200 |
| H | -3.86954900 | 2.12862600 | -3.19357500 |
| H | -2.70423300 | 2.80801600 | -4.35439200 |
| H | -4.26806500 | 3.60755700 | -4.10058400 |
| C | 0.58373000  | 3.51341800 | 0.87678800  |
| H | 0.65861500  | 2.79898600 | 1.69818300  |
| H | 0.08149500  | 4.41986900 | 1.21887700  |
| N | 1.99099000  | 3.90817100 | 0.55519800  |
| C | 3.03570500  | 3.17786200 | 0.99342300  |
| H | 2.78410900  | 2.33005000 | 1.62412900  |
| C | 4.32633500  | 3.48511000 | 0.64626400  |
| H | 5.12274500  | 2.85951400 | 1.02694400  |
| C | 2.20223400  | 4.96374300 | -0.26132900 |
| H | 1.30633700  | 5.48229800 | -0.59009000 |
| C | 3.45975300  | 5.33928600 | -0.64467400 |
| H | 3.56561200  | 6.19848600 | -1.29314200 |

|   |             |             |             |
|---|-------------|-------------|-------------|
| C | 4.59186800  | 4.60078500  | -0.19424300 |
| N | 5.84115800  | 4.94047800  | -0.54920800 |
| C | 6.97448400  | 4.16137500  | -0.06800600 |
| H | 7.89354500  | 4.61505600  | -0.43501400 |
| H | 6.92417700  | 3.12864700  | -0.43008500 |
| H | 7.00455800  | 4.15122200  | 1.02664200  |
| C | 6.06766800  | 6.07911600  | -1.43039900 |
| H | 7.13703200  | 6.17671500  | -1.60871800 |
| H | 5.70296200  | 7.00600900  | -0.97527300 |
| H | 5.56579300  | 5.93583900  | -2.39323200 |
| N | -0.96591000 | 0.35403000  | 0.65111800  |
| N | -0.18703100 | -0.70986300 | 1.11112300  |
| C | 0.96254200  | -0.42260600 | 1.79905500  |
| O | 1.32657400  | 0.69854000  | 2.11614800  |
| O | 1.65726700  | -1.53547000 | 2.07638700  |
| C | 2.95617200  | -1.37201800 | 2.68472900  |
| H | 2.88147200  | -0.56986500 | 3.42356800  |
| C | 3.26516200  | -2.69381300 | 3.35922400  |
| H | 3.34217600  | -3.49340700 | 2.61487400  |
| H | 2.48045900  | -2.95347200 | 4.07559600  |
| H | 4.21764700  | -2.62311400 | 3.89260400  |
| C | 3.95688900  | -1.01141200 | 1.60003400  |
| H | 3.96076600  | -1.79216000 | 0.83134700  |
| H | 4.96250800  | -0.92458700 | 2.02314400  |
| H | 3.69132600  | -0.05806000 | 1.13277300  |
| C | -1.63324500 | 1.03138100  | 1.60105000  |
| O | -2.37755000 | 1.98736500  | 1.31454200  |
| O | -1.45043700 | 0.64445600  | 2.87832200  |
| C | -2.25386200 | 1.29042400  | 3.88417700  |
| H | -2.28500300 | 2.36025000  | 3.65836900  |

|   |             |             |             |
|---|-------------|-------------|-------------|
| C | -1.53000800 | 1.04340500  | 5.19440200  |
| H | -1.46433100 | -0.03211400 | 5.39055100  |
| H | -2.07060000 | 1.51701000  | 6.01940500  |
| H | -0.51585300 | 1.45223300  | 5.15766000  |
| C | -3.66014800 | 0.71406900  | 3.86738200  |
| H | -3.62754100 | -0.35530500 | 4.10567100  |
| H | -4.12113000 | 0.84800800  | 2.88401700  |
| H | -4.27989300 | 1.21601600  | 4.61808900  |
| C | -0.53080700 | -2.08085000 | 0.72918000  |
| C | -1.93890300 | -2.13771000 | 0.07100200  |
| H | -1.94486600 | -1.31336800 | -0.64501300 |
| C | -3.06292100 | -1.91947300 | 1.08778900  |
| H | -3.97673500 | -1.62900100 | 0.56014900  |
| H | -2.82435600 | -1.14552100 | 1.81903900  |
| H | -3.27099600 | -2.83947700 | 1.64399600  |
| C | -2.17292600 | -3.44093400 | -0.69404600 |
| H | -2.08475100 | -4.32083900 | -0.04678300 |
| H | -1.48082800 | -3.55322000 | -1.53334500 |
| H | -3.19005100 | -3.43043000 | -1.09965200 |
| C | -0.46288400 | -3.04862500 | 1.95237100  |
| O | -1.04477100 | -2.84521700 | 2.99761200  |
| C | 0.35013500  | -4.18325800 | 1.55262600  |
| H | 0.48195100  | -5.09296100 | 2.12215300  |
| C | 0.90255500  | -3.92057900 | 0.34161500  |
| N | 0.49106500  | -2.69086800 | -0.16101300 |
| C | 1.03415000  | -1.95727300 | -1.20564700 |
| O | 0.39591500  | -1.11177200 | -1.79457800 |
| O | 2.30788500  | -2.28043500 | -1.41835000 |
| C | 3.03341200  | -1.74921000 | -2.57406900 |
| C | 4.38196700  | -2.44859400 | -2.46605200 |

|   |             |             |             |
|---|-------------|-------------|-------------|
| H | 4.88535700  | -2.17507100 | -1.53327000 |
| H | 5.01935000  | -2.15553700 | -3.30535100 |
| H | 4.24897800  | -3.53533500 | -2.48780900 |
| C | 2.33032100  | -2.14139400 | -3.86841700 |
| H | 1.34167000  | -1.68493400 | -3.94268900 |
| H | 2.23322900  | -3.22992500 | -3.93259300 |
| H | 2.93394900  | -1.80187400 | -4.71598200 |
| C | 3.18982200  | -0.23895200 | -2.43412300 |
| H | 2.23523200  | 0.27502700  | -2.55984500 |
| H | 3.88712300  | 0.12116200  | -3.19740700 |
| H | 3.60254100  | 0.00762700  | -1.44964100 |
| C | 1.72655900  | -4.86417700 | -0.43849800 |
| C | 3.21783300  | -6.74738200 | -1.86359600 |
| C | 2.70933100  | -5.61755000 | 0.20811000  |
| C | 1.48532300  | -5.06663100 | -1.80278600 |
| C | 2.22488100  | -6.00795900 | -2.50917200 |
| C | 3.45759900  | -6.55100500 | -0.50576000 |
| H | 2.89389600  | -5.46061300 | 1.26713100  |
| H | 0.70876500  | -4.49528000 | -2.30590300 |
| H | 2.02595800  | -6.16678500 | -3.56483900 |
| H | 4.22776000  | -7.12406600 | 0.00117800  |
| H | 3.79851800  | -7.47771900 | -2.41882600 |
| C | -4.86207500 | 0.83434000  | -0.45797300 |
| O | -5.27178500 | 0.77689300  | 0.68460000  |
| O | -3.68974600 | 1.29702600  | -0.84017300 |
| H | -3.15973700 | 1.60473900  | -0.03702800 |
| O | -5.53303900 | 0.44105200  | -1.54901300 |
| C | -6.88438300 | -0.08822000 | -1.43529200 |
| C | -6.88306600 | -1.37584800 | -0.61758600 |
| H | -6.15585800 | -2.08288300 | -1.03155600 |



|   |             |             |             |
|---|-------------|-------------|-------------|
| H | -7.87475000 | -1.83701800 | -0.66796700 |
| H | -6.63876000 | -1.18219000 | 0.42809500  |
| C | -7.81856600 | 0.96715100  | -0.85194300 |
| H | -7.58326500 | 1.17237800  | 0.19332100  |
| H | -8.85176900 | 0.61149200  | -0.91768600 |
| H | -7.73856000 | 1.89665500  | -1.42543400 |
| C | -7.25314800 | -0.38025400 | -2.88503800 |
| H | -6.55790600 | -1.10628300 | -3.31768900 |
| H | -7.21496200 | 0.53696300  | -3.48093000 |
| H | -8.26586200 | -0.79031200 | -2.93777200 |

Zero-point correction= 1.075044 (Hartree/Particle)

Thermal correction to Energy= 1.141253

Thermal correction to Enthalpy= 1.142197

Thermal correction to Gibbs Free Energy= 0.967944

Sum of electronic and zero-point Energies= -2890.105479

Sum of electronic and thermal Energies= -2890.039271

Sum of electronic and thermal Enthalpies= -2890.038327

Sum of electronic and thermal Free Energies= -2890.212579

E(RM062X/6-311+G(2d,p)) = -2892.08512891

#### **RR-TS4-CONF2**

|   |            |            |            |
|---|------------|------------|------------|
| C | 1.12366500 | 1.13406500 | 1.03208400 |
| H | 0.82149100 | 1.77259700 | 1.85099900 |
| H | 0.54383500 | 1.25000300 | 0.11930200 |
| C | 2.42845000 | 0.70508600 | 0.94991900 |
| C | 3.34069300 | 0.73994400 | 2.07086500 |
| O | 4.47997000 | 0.27714400 | 2.04642900 |
| O | 2.86049300 | 1.37654000 | 3.16140000 |
| C | 3.78583300 | 1.59345000 | 4.22871700 |
| H | 4.20211700 | 0.63852800 | 4.56114600 |

|   |             |             |             |
|---|-------------|-------------|-------------|
| H | 4.61632900  | 2.20953900  | 3.86580800  |
| C | 3.02763900  | 2.28043300  | 5.34322500  |
| H | 2.20474000  | 1.64914800  | 5.69136100  |
| H | 2.61304200  | 3.23296300  | 5.00057500  |
| H | 3.69707900  | 2.47548500  | 6.18605200  |
| C | 2.93676500  | 0.00681600  | -0.26469100 |
| H | 2.14290200  | -0.07607600 | -1.00895800 |
| H | 3.32801800  | -0.99543800 | -0.06674100 |
| N | 4.06324500  | 0.74788700  | -0.91118700 |
| C | 3.80946500  | 1.91313600  | -1.54701200 |
| H | 2.77117700  | 2.22819000  | -1.55684100 |
| C | 4.79844200  | 2.65091100  | -2.13458900 |
| H | 4.52740100  | 3.57025500  | -2.63592000 |
| C | 5.33289700  | 0.30112400  | -0.82324300 |
| H | 5.47226400  | -0.62168700 | -0.27423000 |
| C | 6.38068400  | 0.98282700  | -1.38276600 |
| H | 7.37509600  | 0.57114200  | -1.27598300 |
| C | 6.14987300  | 2.20299400  | -2.07523800 |
| N | 7.14841600  | 2.89698400  | -2.64044800 |
| C | 6.87075100  | 4.14993500  | -3.33201400 |
| H | 7.80607500  | 4.55167400  | -3.71789600 |
| H | 6.42932700  | 4.88411800  | -2.64977000 |
| H | 6.18659900  | 3.99022800  | -4.17205300 |
| C | 8.51774800  | 2.40472800  | -2.55620600 |
| H | 9.17402100  | 3.10386400  | -3.07118100 |
| H | 8.61006800  | 1.42261200  | -3.03186200 |
| H | 8.84191100  | 2.32475600  | -1.51328600 |
| N | -0.24012100 | -0.28838900 | 1.60447500  |
| N | -1.37142500 | -0.38522300 | 0.79550700  |
| C | -1.28756600 | -0.77199900 | -0.51824400 |

|   |             |             |             |
|---|-------------|-------------|-------------|
| O | -2.23423200 | -0.73581800 | -1.28513200 |
| O | -0.05366900 | -1.18475300 | -0.86053000 |
| C | 0.05759600  | -1.72335100 | -2.19996900 |
| H | -0.84963600 | -2.30201200 | -2.39229300 |
| C | 0.17920900  | -0.58721800 | -3.20241800 |
| H | 1.07810000  | 0.00801600  | -3.00129800 |
| H | -0.69788600 | 0.06297300  | -3.15587800 |
| H | 0.25892200  | -0.99101900 | -4.21679400 |
| C | 1.26671100  | -2.63948600 | -2.20074800 |
| H | 2.19439800  | -2.07424800 | -2.06405000 |
| H | 1.32713800  | -3.15872700 | -3.16215800 |
| H | 1.19400400  | -3.38499500 | -1.40360000 |
| C | 0.23002100  | -1.47616700 | 2.01252300  |
| O | -0.20634500 | -2.61842200 | 1.78930200  |
| O | 1.31521400  | -1.30093100 | 2.79736400  |
| C | 2.01711900  | -2.48672500 | 3.20976900  |
| H | 1.27929300  | -3.21800200 | 3.55214200  |
| C | 2.91809900  | -2.05327700 | 4.35067400  |
| H | 3.68483100  | -1.36835200 | 3.97395800  |
| H | 3.41478200  | -2.92507700 | 4.78771700  |
| H | 2.34283800  | -1.54894500 | 5.13315500  |
| C | 2.81297800  | -3.05243100 | 2.04457000  |
| H | 3.54920800  | -2.30956500 | 1.71630100  |
| H | 2.14938700  | -3.31095400 | 1.21476500  |
| H | 3.34759100  | -3.95624200 | 2.35550800  |
| C | -2.66885500 | 0.09955100  | 1.26237500  |
| C | -2.64512300 | 0.37308900  | 2.78985900  |
| H | -1.72249700 | 0.93266900  | 2.95702700  |
| C | -2.59879700 | -0.91788500 | 3.61394000  |
| H | -2.22149400 | -0.68817900 | 4.61585100  |

|   |             |             |             |
|---|-------------|-------------|-------------|
| H | -1.96495200 | -1.68376100 | 3.16329300  |
| H | -3.60027800 | -1.34711000 | 3.72079000  |
| C | -3.82018100 | 1.24221500  | 3.23990100  |
| H | -4.78580900 | 0.79294700  | 2.98062200  |
| H | -3.77410700 | 2.24556900  | 2.80702200  |
| H | -3.78682300 | 1.34623700  | 4.32934000  |
| C | -3.79758600 | -0.91449700 | 0.89418100  |
| O | -3.76765600 | -2.08458100 | 1.21180900  |
| C | -4.83831700 | -0.17015000 | 0.20735000  |
| H | -5.80900800 | -0.55766600 | -0.06927900 |
| C | -4.40013900 | 1.09271400  | -0.01097900 |
| N | -3.12906600 | 1.30070900  | 0.51703300  |
| C | -2.27237500 | 2.36446900  | 0.29226300  |
| O | -1.38836600 | 2.65825400  | 1.07021700  |
| O | -2.53151900 | 2.95996400  | -0.86913100 |
| C | -1.85313000 | 4.19747800  | -1.24976500 |
| C | -2.52059500 | 4.54130400  | -2.57503800 |
| H | -2.35894500 | 3.74192000  | -3.30474600 |
| H | -2.10203600 | 5.47054000  | -2.97242000 |
| H | -3.59848700 | 4.67256200  | -2.43301700 |
| C | -2.11475900 | 5.28940700  | -0.21898900 |
| H | -1.67901700 | 5.03941600  | 0.75001100  |
| H | -3.19148200 | 5.44868700  | -0.10192400 |
| H | -1.66758100 | 6.22444800  | -0.57098300 |
| C | -0.36395700 | 3.92845100  | -1.44386300 |
| H | 0.13285300  | 3.73535600  | -0.49094400 |
| H | 0.10064200  | 4.80115600  | -1.91414600 |
| H | -0.22390400 | 3.06620400  | -2.10535000 |
| C | -5.20897900 | 2.18022900  | -0.59755600 |
| C | -6.85130700 | 4.17970200  | -1.64952000 |

|   |             |             |             |
|---|-------------|-------------|-------------|
| C | -5.95901700 | 1.93813500  | -1.75042100 |
| C | -5.29065100 | 3.42788500  | 0.03224600  |
| C | -6.11229700 | 4.42021100  | -0.48953000 |
| C | -6.77270900 | 2.93900700  | -2.27749700 |
| H | -5.88826500 | 0.97149200  | -2.24048500 |
| H | -4.71856600 | 3.61453900  | 0.93815200  |
| H | -6.17837800 | 5.38235100  | 0.00976100  |
| H | -7.34432900 | 2.74687700  | -3.18026600 |
| H | -7.48851500 | 4.95783500  | -2.05872800 |
| C | -0.81189400 | -4.75046800 | -0.56448200 |
| O | 0.16093900  | -5.20186100 | 0.00825000  |
| O | -1.47274200 | -3.66269500 | -0.22471900 |
| H | -1.02846500 | -3.22913800 | 0.57018500  |
| O | -1.39172300 | -5.27450000 | -1.65185500 |
| C | -0.91685700 | -6.53335200 | -2.20803300 |
| C | 0.50401600  | -6.37436000 | -2.73809600 |
| H | 0.54363300  | -5.55847400 | -3.46727200 |
| H | 0.80790400  | -7.29763200 | -3.24207400 |
| H | 1.20703200  | -6.16814900 | -1.92921600 |
| C | -1.02708700 | -7.64888800 | -1.17311200 |
| H | -0.30580300 | -7.51808600 | -0.36547100 |
| H | -0.84096800 | -8.61142500 | -1.66014500 |
| H | -2.03697700 | -7.66846400 | -0.75017200 |
| C | -1.88762200 | -6.78051600 | -3.35683300 |
| H | -1.85247100 | -5.95225500 | -4.07126600 |
| H | -2.91094500 | -6.87233400 | -2.98013600 |
| H | -1.62178800 | -7.70451900 | -3.87855100 |

Zero-point correction= 1.076026 (Hartree/Particle)

Thermal correction to Energy= 1.141698

Thermal correction to Enthalpy= 1.142642

Thermal correction to Gibbs Free Energy= 0.971660  
 Sum of electronic and zero-point Energies= -2890.103704  
 Sum of electronic and thermal Energies= -2890.038032  
 Sum of electronic and thermal Enthalpies= -2890.037088  
 Sum of electronic and thermal Free Energies= -2890.208069  
 E(RM062X/6-311+G(2d,p)) = -2892.08649840

**RR-TS4-CONF3**

|   |             |             |             |
|---|-------------|-------------|-------------|
| C | -0.30134900 | -0.25511900 | 0.18982200  |
| H | 0.09476900  | -0.02164600 | -0.79177400 |
| H | 0.18867800  | -1.04965400 | 0.73822100  |
| C | -1.56057200 | 0.14852300  | 0.53256000  |
| C | -2.27856100 | 1.15317500  | -0.21658000 |
| O | -3.37346600 | 1.61891000  | 0.13520200  |
| O | -1.70158100 | 1.53052400  | -1.36051500 |
| C | -2.37646800 | 2.54852700  | -2.11022300 |
| H | -3.37820800 | 2.19637700  | -2.37959900 |
| H | -2.49112300 | 3.43596500  | -1.48033600 |
| C | -1.52999100 | 2.83255700  | -3.33045300 |
| H | -1.43082700 | 1.93569400  | -3.94889700 |
| H | -0.53038000 | 3.15855900  | -3.03126500 |
| H | -1.99550400 | 3.61972200  | -3.93049600 |
| C | -2.11278200 | -0.12793700 | 1.89280500  |
| H | -2.23981200 | 0.80015800  | 2.45496100  |
| H | -1.44153100 | -0.78543800 | 2.45156400  |
| N | -3.45010600 | -0.78535400 | 1.85904500  |
| C | -4.52708800 | -0.19994700 | 2.42290700  |
| H | -4.35328400 | 0.76393800  | 2.88643600  |
| C | -5.76525100 | -0.78182300 | 2.39735900  |
| H | -6.58825900 | -0.25393200 | 2.85951500  |

|   |             |             |             |
|---|-------------|-------------|-------------|
| C | -3.58502500 | -1.98770700 | 1.25636800  |
| H | -2.67951600 | -2.39870800 | 0.82373100  |
| C | -4.78682900 | -2.63232100 | 1.18524900  |
| H | -4.82817500 | -3.59011500 | 0.68467800  |
| C | -5.95110100 | -2.02715200 | 1.73682600  |
| N | -7.15830700 | -2.60235100 | 1.63714300  |
| C | -8.32665100 | -1.93215300 | 2.18850000  |
| H | -9.20295400 | -2.55890700 | 2.02863500  |
| H | -8.48646200 | -0.96419800 | 1.69948100  |
| H | -8.21019600 | -1.76954200 | 3.26493200  |
| C | -7.32058900 | -3.82379700 | 0.86020900  |
| H | -6.99177700 | -3.67285500 | -0.17397000 |
| H | -8.37351300 | -4.10148700 | 0.85533400  |
| H | -6.74726500 | -4.64696300 | 1.29981100  |
| N | 1.17957100  | 1.09808500  | 1.06665100  |
| N | 2.43552200  | 1.08443000  | 0.43720900  |
| C | 2.48539300  | 1.28019200  | -0.91819200 |
| O | 1.53338800  | 1.53470000  | -1.63146000 |
| O | 3.74298400  | 1.12135100  | -1.37990300 |
| C | 3.94724400  | 1.24425900  | -2.79976100 |
| H | 3.10372100  | 0.75924300  | -3.30029200 |
| C | 4.00930600  | 2.71267800  | -3.18210200 |
| H | 4.81495600  | 3.20766500  | -2.62919800 |
| H | 3.06400200  | 3.20885100  | -2.94969600 |
| H | 4.20580000  | 2.81593600  | -4.25398900 |
| C | 5.23844500  | 0.50022300  | -3.08494100 |
| H | 6.08113300  | 1.00495600  | -2.59989300 |
| H | 5.42517100  | 0.46964400  | -4.16264100 |
| H | 5.17865600  | -0.52481700 | -2.70417000 |
| C | 0.61060700  | 2.31886500  | 1.14946500  |

|   |             |             |             |
|---|-------------|-------------|-------------|
| O | -0.50100000 | 2.50588300  | 1.65120500  |
| O | 1.34455400  | 3.36021700  | 0.65121700  |
| C | 0.77555500  | 4.66652900  | 0.77552600  |
| H | -0.29769300 | 4.59765900  | 0.57234300  |
| C | 1.46113400  | 5.51891000  | -0.27741200 |
| H | 1.27596300  | 5.11623300  | -1.27760300 |
| H | 2.54278400  | 5.53194600  | -0.10476300 |
| H | 1.08846400  | 6.54737700  | -0.23923900 |
| C | 0.99506800  | 5.19643500  | 2.18491700  |
| H | 2.06814600  | 5.26646500  | 2.39644800  |
| H | 0.53100600  | 4.52772900  | 2.91475200  |
| H | 0.55451500  | 6.19312800  | 2.29440600  |
| C | 3.62359900  | 0.69725800  | 1.19076000  |
| C | 3.31568900  | 0.61556600  | 2.71097600  |
| H | 2.39350200  | 0.03375900  | 2.76932500  |
| C | 3.07472400  | 1.99938600  | 3.32486900  |
| H | 2.47093100  | 1.89440100  | 4.23229300  |
| H | 2.56677200  | 2.67600900  | 2.63662500  |
| H | 4.02354600  | 2.46997800  | 3.60310900  |
| C | 4.40368100  | -0.11744900 | 3.49746500  |
| H | 5.37488500  | 0.38386000  | 3.41886600  |
| H | 4.52074200  | -1.15501800 | 3.17220400  |
| H | 4.12465300  | -0.12755100 | 4.55634900  |
| C | 4.82167300  | 1.66686500  | 0.94309900  |
| O | 4.74966100  | 2.87071800  | 1.07847100  |
| C | 5.97617600  | 0.84844500  | 0.61053700  |
| H | 6.99271700  | 1.20633200  | 0.52042300  |
| C | 5.57041600  | -0.43509600 | 0.45209500  |
| N | 4.21188400  | -0.59079000 | 0.71510000  |
| C | 3.38495100  | -1.60592100 | 0.25816700  |



|   |             |             |             |
|---|-------------|-------------|-------------|
| O | 2.31246500  | -1.84649300 | 0.77040400  |
| O | 3.91276500  | -2.22190700 | -0.79776900 |
| C | 3.29348800  | -3.42039000 | -1.36138900 |
| C | 4.27976900  | -3.81683500 | -2.45229400 |
| H | 4.35566400  | -3.02891900 | -3.20816600 |
| H | 3.94444500  | -4.73672400 | -2.94014600 |
| H | 5.27201000  | -3.98771900 | -2.02108000 |
| C | 3.19644700  | -4.51689600 | -0.30677300 |
| H | 2.52104200  | -4.23616800 | 0.50320900  |
| H | 4.18708200  | -4.73315400 | 0.10647600  |
| H | 2.81605100  | -5.42890900 | -0.77756400 |
| C | 1.93666600  | -3.06022800 | -1.95580000 |
| H | 1.20899400  | -2.82833400 | -1.17599400 |
| H | 1.56554000  | -3.90391500 | -2.54645700 |
| H | 2.03537600  | -2.19316800 | -2.61783900 |
| C | 6.45404000  | -1.58554600 | 0.18093700  |
| C | 8.20353000  | -3.71594100 | -0.27657200 |
| C | 6.28050700  | -2.79823500 | 0.85954000  |
| C | 7.51193700  | -1.44602500 | -0.72130400 |
| C | 8.37987600  | -2.51083900 | -0.95251400 |
| C | 7.15510100  | -3.85508700 | 0.63473600  |
| H | 5.46601100  | -2.90856900 | 1.57183400  |
| H | 7.64159800  | -0.50763100 | -1.25294400 |
| H | 9.19239000  | -2.39768500 | -1.66358400 |
| H | 7.01923300  | -4.78955200 | 1.17102300  |
| H | 8.88144000  | -4.54492300 | -0.45571200 |
| C | -6.44777200 | 0.39949700  | -0.99614000 |
| O | -6.65611800 | 1.55643600  | -1.29170100 |
| O | -5.28237600 | -0.07941300 | -0.58600000 |
| H | -4.65849300 | 0.67475200  | -0.41428600 |

|   |              |             |             |
|---|--------------|-------------|-------------|
| O | -7.33038000  | -0.60241900 | -1.02364300 |
| C | -8.63621100  | -0.40557500 | -1.64961100 |
| C | -9.45043400  | 0.64093700  | -0.89655600 |
| H | -9.52096600  | 0.38086100  | 0.16466800  |
| H | -10.46499200 | 0.66445300  | -1.30709700 |
| H | -9.00949600  | 1.63363900  | -0.99140200 |
| C | -8.45022900  | -0.03951400 | -3.11818400 |
| H | -7.99533700  | 0.94680600  | -3.22717300 |
| H | -9.42526700  | -0.03078400 | -3.61495800 |
| H | -7.81771000  | -0.78272600 | -3.61455100 |
| C | -9.28287300  | -1.77834300 | -1.51838900 |
| H | -9.37716600  | -2.05640200 | -0.46343600 |
| H | -8.68333100  | -2.53727500 | -2.03060600 |
| H | -10.28173500 | -1.76261600 | -1.96399500 |

Zero-point correction= 1.074489 (Hartree/Particle)

Thermal correction to Energy= 1.140781

Thermal correction to Enthalpy= 1.141726

Thermal correction to Gibbs Free Energy= 0.967071

Sum of electronic and zero-point Energies= -2890.095134

Sum of electronic and thermal Energies= -2890.028842

Sum of electronic and thermal Enthalpies= -2890.027898

Sum of electronic and thermal Free Energies= -2890.202552

E(RM062X/6-311+G(2d,p)) = -2892.07731702

#### **RR-TS4-CONF4**

|   |            |             |             |
|---|------------|-------------|-------------|
| C | 0.99809600 | -0.51184100 | 0.01073500  |
| H | 0.31044500 | -0.25683200 | -0.78601100 |
| H | 0.77279500 | -1.43764100 | 0.53185000  |
| C | 2.31978600 | -0.11569900 | -0.10004500 |
| C | 2.75523600 | 0.90579400  | -1.01734500 |

|   |            |             |             |
|---|------------|-------------|-------------|
| O | 3.89878300 | 1.35405100  | -1.06863400 |
| O | 1.79337600 | 1.31437900  | -1.88479800 |
| C | 2.17644600 | 2.31243900  | -2.83052600 |
| H | 2.26756700 | 3.27716300  | -2.31468200 |
| H | 3.15987100 | 2.06620900  | -3.24123600 |
| C | 1.11455100 | 2.34575100  | -3.90816200 |
| H | 0.13507700 | 2.54932100  | -3.46819700 |
| H | 1.07376300 | 1.38424800  | -4.42943100 |
| H | 1.34560000 | 3.12627100  | -4.63991800 |
| C | 3.35391500 | -0.56152600 | 0.87491800  |
| H | 2.91246100 | -1.18136600 | 1.65976200  |
| H | 3.87611300 | 0.27242300  | 1.34992000  |
| N | 4.42947500 | -1.38340700 | 0.23129300  |
| C | 4.15048800 | -2.64120300 | -0.17420400 |
| H | 3.13746300 | -2.98194200 | 0.01167500  |
| C | 5.08322900 | -3.43267000 | -0.78379600 |
| H | 4.79814500 | -4.43421500 | -1.07630300 |
| C | 5.65494000 | -0.86830800 | 0.00419200  |
| H | 5.80113900 | 0.15665800  | 0.32114900  |
| C | 6.64452700 | -1.59407200 | -0.60521400 |
| H | 7.60589700 | -1.12220200 | -0.75691900 |
| C | 6.39529700 | -2.93034400 | -1.02130900 |
| N | 7.34099700 | -3.67986600 | -1.60735200 |
| C | 7.04474800 | -5.04930400 | -2.00897700 |
| H | 7.94100600 | -5.48906900 | -2.44275400 |
| H | 6.24536600 | -5.07488000 | -2.75714800 |
| H | 6.74281400 | -5.65303500 | -1.14664600 |
| C | 8.66883200 | -3.12718100 | -1.84260700 |
| H | 9.28241200 | -3.88272600 | -2.33025500 |
| H | 9.14728000 | -2.84311200 | -0.89925700 |

|   |             |             |             |
|---|-------------|-------------|-------------|
| H | 8.61697000  | -2.24731200 | -2.49247700 |
| N | -0.13717300 | 0.48101200  | 1.33379600  |
| N | -1.35729600 | -0.18637100 | 1.50106800  |
| C | -1.41858300 | -1.38728900 | 2.16329800  |
| O | -2.46321900 | -1.97510400 | 2.38803200  |
| O | -0.20926300 | -1.85722000 | 2.51155400  |
| C | -0.19615900 | -3.13866800 | 3.17775800  |
| H | -1.03631600 | -3.16013600 | 3.87652900  |
| C | -0.34413400 | -4.24783800 | 2.14996000  |
| H | 0.48384200  | -4.21153700 | 1.43246700  |
| H | -1.28937900 | -4.14817600 | 1.61022400  |
| H | -0.32842300 | -5.22357500 | 2.64546200  |
| C | 1.11935800  | -3.19922800 | 3.92829800  |
| H | 1.96306800  | -3.16120200 | 3.23024700  |
| H | 1.18195900  | -4.13402700 | 4.49316600  |
| H | 1.20186200  | -2.36228800 | 4.62688200  |
| C | 0.40572500  | 0.83184600  | 2.54568600  |
| O | -0.11406600 | 0.78135900  | 3.64962500  |
| O | 1.65852200  | 1.30885400  | 2.34788200  |
| C | 2.28282300  | 1.97131100  | 3.45917000  |
| H | 1.50469200  | 2.50363900  | 4.01489500  |
| C | 3.26667600  | 2.95751500  | 2.85554400  |
| H | 4.03133900  | 2.43098500  | 2.27304300  |
| H | 3.76552700  | 3.52410600  | 3.64811500  |
| H | 2.74860900  | 3.65209500  | 2.18955300  |
| C | 2.94707200  | 0.95030900  | 4.36854500  |
| H | 3.72119400  | 0.39926300  | 3.82257100  |
| H | 2.20505900  | 0.24316400  | 4.74726100  |
| H | 3.41880700  | 1.45108700  | 5.22032500  |
| C | -2.63585300 | 0.40120800  | 1.09934300  |

|   |             |             |             |
|---|-------------|-------------|-------------|
| C | -2.45081000 | 1.83810400  | 0.55206000  |
| H | -1.60265200 | 1.77809200  | -0.13119700 |
| C | -2.14747700 | 2.85657700  | 1.65469100  |
| H | -1.71945700 | 3.75542600  | 1.19735700  |
| H | -1.45880000 | 2.47420800  | 2.41049800  |
| H | -3.06646400 | 3.15107000  | 2.17167800  |
| C | -3.65090400 | 2.30969300  | -0.26939400 |
| H | -4.57965000 | 2.30232100  | 0.31307400  |
| H | -3.79466900 | 1.70142900  | -1.16673600 |
| H | -3.46698500 | 3.33946500  | -0.59192100 |
| C | -3.67803500 | 0.37985700  | 2.26416000  |
| O | -3.47606300 | 0.87779200  | 3.35136600  |
| C | -4.88210900 | -0.25209300 | 1.75275400  |
| H | -5.82949400 | -0.30795700 | 2.27075800  |
| C | -4.62708300 | -0.74282200 | 0.51686600  |
| N | -3.32908600 | -0.45841200 | 0.10332400  |
| C | -2.64664800 | -0.97765700 | -0.98380600 |
| O | -1.72336600 | -0.39045600 | -1.50919200 |
| O | -3.11404700 | -2.17533200 | -1.32386400 |
| C | -2.64136800 | -2.85419400 | -2.53041400 |
| C | -3.50768100 | -4.10656800 | -2.55993100 |
| H | -3.34870400 | -4.70372500 | -1.65671200 |
| H | -3.25283000 | -4.71452100 | -3.43282300 |
| H | -4.56681500 | -3.83387100 | -2.61731600 |
| C | -2.89763600 | -1.99628400 | -3.76408300 |
| H | -2.30748400 | -1.07834200 | -3.74540600 |
| H | -3.96025400 | -1.74285800 | -3.83526900 |
| H | -2.62302100 | -2.56857100 | -4.65590300 |
| C | -1.16806100 | -3.21391700 | -2.37075200 |
| H | -0.53635200 | -2.32395800 | -2.39082000 |

|   |             |             |             |
|---|-------------|-------------|-------------|
| H | -0.86944200 | -3.87642700 | -3.18948000 |
| H | -1.01088900 | -3.74312200 | -1.42497700 |
| C | -5.62669600 | -1.37265900 | -0.36926200 |
| C | -7.61085600 | -2.48556500 | -1.98973700 |
| C | -6.49078900 | -2.34191900 | 0.14457500  |
| C | -5.76558300 | -0.95595600 | -1.69862000 |
| C | -6.75675600 | -1.50719200 | -2.50233200 |
| C | -7.47575700 | -2.90086400 | -0.66719200 |
| H | -6.37626400 | -2.66794400 | 1.17425000  |
| H | -5.10358300 | -0.19073400 | -2.09758100 |
| H | -6.86465900 | -1.17256700 | -3.52984700 |
| H | -8.13649900 | -3.66211200 | -0.26399000 |
| H | -8.38071600 | -2.91921600 | -2.62077500 |
| C | 0.36570200  | 3.81793800  | -0.57899000 |
| O | -0.54633000 | 3.52549300  | -1.32372400 |
| O | 0.88929600  | 3.03445200  | 0.35234100  |
| H | 0.44199400  | 2.15334400  | 0.37649200  |
| O | 1.01535600  | 4.98296300  | -0.54410900 |
| C | 0.56232000  | 6.10783600  | -1.35699500 |
| C | 0.70861400  | 5.78918600  | -2.84053000 |
| H | 1.74123400  | 5.50354600  | -3.06804700 |
| H | 0.46673400  | 6.68356200  | -3.42393800 |
| H | 0.03688200  | 4.98328200  | -3.14052800 |
| C | -0.86977600 | 6.47657400  | -0.98372900 |
| H | -1.57627100 | 5.70704500  | -1.29967100 |
| H | -1.13768400 | 7.41886800  | -1.47187100 |
| H | -0.95172700 | 6.61617100  | 0.09939600  |
| C | 1.52209400  | 7.21978700  | -0.95255900 |
| H | 2.55473400  | 6.93083000  | -1.17079900 |
| H | 1.43629600  | 7.42983900  | 0.11788600  |

|                                              |            |            |                             |
|----------------------------------------------|------------|------------|-----------------------------|
| H                                            | 1.28888400 | 8.13234100 | -1.50865000                 |
| Zero-point correction=                       |            |            | 1.075406 (Hartree/Particle) |
| Thermal correction to Energy=                |            |            | 1.141635                    |
| Thermal correction to Enthalpy=              |            |            | 1.142579                    |
| Thermal correction to Gibbs Free Energy=     |            |            | 0.969918                    |
| Sum of electronic and zero-point Energies=   |            |            | -2890.098449                |
| Sum of electronic and thermal Energies=      |            |            | -2890.032219                |
| Sum of electronic and thermal Enthalpies=    |            |            | -2890.031275                |
| Sum of electronic and thermal Free Energies= |            |            | -2890.203937                |
| E(RM062X/6-311+G(2d,p)) =                    |            |            | -2892.07993225              |

**RR-TS4-CONF5**

|   |             |             |             |
|---|-------------|-------------|-------------|
| C | 1.19589000  | -0.75936400 | 0.17586600  |
| H | 0.47912700  | -0.73546400 | -0.63883600 |
| H | 1.09422300  | -1.59146400 | 0.86442700  |
| C | 2.45820800  | -0.22756800 | -0.02175900 |
| C | 2.76987300  | 0.67544500  | -1.10014200 |
| O | 3.86947500  | 1.19476700  | -1.27909900 |
| O | 1.73977400  | 0.89431200  | -1.95513300 |
| C | 2.02828300  | 1.74418600  | -3.06488300 |
| H | 2.30903000  | 2.73696200  | -2.69676200 |
| H | 2.88693100  | 1.34354900  | -3.61477200 |
| C | 0.78915000  | 1.79985900  | -3.92962300 |
| H | -0.05376000 | 2.18682900  | -3.35197600 |
| H | 0.53595400  | 0.80183900  | -4.30105500 |
| H | 0.96332000  | 2.45497100  | -4.78923800 |
| C | 3.54647600  | -0.39113000 | 0.98497400  |
| H | 3.19967500  | -0.95976200 | 1.84903100  |
| H | 3.93947500  | 0.56277900  | 1.34413200  |
| N | 4.72778300  | -1.12797600 | 0.42687300  |

|   |             |             |             |
|---|-------------|-------------|-------------|
| C | 4.62629200  | -2.45300500 | 0.18814800  |
| H | 3.67134000  | -2.90387600 | 0.43676100  |
| C | 5.65854700  | -3.17988800 | -0.33646200 |
| H | 5.51414400  | -4.23983700 | -0.49601700 |
| C | 5.87121700  | -0.48405700 | 0.11934900  |
| H | 5.87721000  | 0.58183900  | 0.30781100  |
| C | 6.95130500  | -1.13847100 | -0.41292300 |
| H | 7.83887000  | -0.56279300 | -0.63760000 |
| C | 6.88727500  | -2.53635300 | -0.66045600 |
| N | 7.92575400  | -3.21576900 | -1.17221600 |
| C | 7.81586200  | -4.64951900 | -1.40962200 |
| H | 8.76427200  | -5.01418500 | -1.79989700 |
| H | 7.02950200  | -4.86849700 | -2.13999200 |
| H | 7.59427900  | -5.18410500 | -0.47990500 |
| C | 9.16170300  | -2.51862600 | -1.50466700 |
| H | 9.87237200  | -3.23670600 | -1.91034100 |
| H | 9.60199200  | -2.05532200 | -0.61519300 |
| H | 8.98368500  | -1.74219100 | -2.25613200 |
| N | -0.06981800 | 0.32989300  | 1.29879500  |
| N | -1.36158300 | -0.22084400 | 1.32201400  |
| C | -1.60021700 | -1.42166400 | 1.94269500  |
| O | -2.71129500 | -1.90876000 | 2.06399000  |
| O | -0.47647800 | -2.00651800 | 2.38866800  |
| C | -0.62762200 | -3.29212600 | 3.02725400  |
| H | -1.50110900 | -3.23918500 | 3.68333600  |
| C | -0.82771800 | -4.36943500 | 1.97446900  |
| H | 0.03500200  | -4.40139900 | 1.29948000  |
| H | -1.73112900 | -4.17567400 | 1.39098900  |
| H | -0.92711700 | -5.34776200 | 2.45490300  |
| C | 0.63961000  | -3.48988800 | 3.83645700  |



|   |             |             |             |
|---|-------------|-------------|-------------|
| H | 1.51312400  | -3.52019200 | 3.17546400  |
| H | 0.58859100  | -4.43435700 | 4.38589000  |
| H | 0.77408100  | -2.67450100 | 4.55299100  |
| C | 0.43862000  | 0.59303700  | 2.54574400  |
| O | 1.61589300  | 0.86458400  | 2.74106400  |
| O | -0.47158700 | 0.55287300  | 3.54812600  |
| C | -0.01824100 | 0.92889400  | 4.85664400  |
| H | 0.97641100  | 0.49919000  | 5.01209600  |
| C | -1.02152100 | 0.32915300  | 5.82417500  |
| H | -2.02066400 | 0.72517600  | 5.61693600  |
| H | -0.74972100 | 0.57677000  | 6.85489600  |
| H | -1.05459800 | -0.76002000 | 5.72320400  |
| C | 0.05165400  | 2.44474600  | 4.95415000  |
| H | -0.94466000 | 2.87380700  | 4.80046700  |
| H | 0.73243600  | 2.84459900  | 4.19764300  |
| H | 0.41185500  | 2.74733100  | 5.94283000  |
| C | -2.53521400 | 0.49989500  | 0.82782000  |
| C | -2.15847800 | 1.90960100  | 0.30705000  |
| H | -1.26003500 | 1.76166600  | -0.29281300 |
| C | -1.86014000 | 2.90319900  | 1.43212300  |
| H | -1.35193600 | 3.77336000  | 1.00330500  |
| H | -1.23521600 | 2.47643400  | 2.21817200  |
| H | -2.78591700 | 3.25097900  | 1.90137500  |
| C | -3.22006400 | 2.49357300  | -0.62550700 |
| H | -4.19865100 | 2.57884800  | -0.13841400 |
| H | -3.33241000 | 1.89913400  | -1.53661900 |
| H | -2.90390600 | 3.49884900  | -0.92140700 |
| C | -3.66473000 | 0.58327000  | 1.90438100  |
| O | -3.50387200 | 1.05752200  | 3.01009300  |
| C | -4.88003000 | 0.07733500  | 1.29071900  |

|   |             |             |             |
|---|-------------|-------------|-------------|
| H | -5.86775600 | 0.11650000  | 1.72886700  |
| C | -4.57604300 | -0.43354000 | 0.07350300  |
| N | -3.22685100 | -0.28248600 | -0.23033100 |
| C | -2.50486500 | -0.87550900 | -1.25267800 |
| O | -1.46712300 | -0.40309600 | -1.66853900 |
| O | -3.07699500 | -2.00504700 | -1.66058200 |
| C | -2.58294700 | -2.71541600 | -2.84007700 |
| C | -3.55227800 | -3.88551600 | -2.94503900 |
| H | -3.49424200 | -4.51305700 | -2.05023100 |
| H | -3.30513900 | -4.49550200 | -3.81874500 |
| H | -4.57889400 | -3.51893600 | -3.04977500 |
| C | -2.68121500 | -1.82373000 | -4.07226000 |
| H | -2.04801600 | -0.93940600 | -3.97619100 |
| H | -3.71763700 | -1.51115100 | -4.23405400 |
| H | -2.35407700 | -2.39115500 | -4.94934300 |
| C | -1.16025700 | -3.20837500 | -2.59560400 |
| H | -0.44335400 | -2.38587700 | -2.61103500 |
| H | -0.89176700 | -3.92560500 | -3.37790800 |
| H | -1.09953700 | -3.71721700 | -1.62782700 |
| C | -5.56031500 | -0.95611300 | -0.89546700 |
| C | -7.51134700 | -1.85485100 | -2.68040800 |
| C | -6.55781300 | -1.83223200 | -0.46219300 |
| C | -5.54809000 | -0.52460700 | -2.22710800 |
| C | -6.52280800 | -0.96865000 | -3.11293900 |
| C | -7.52642100 | -2.28488300 | -1.35576000 |
| H | -6.56011400 | -2.17078700 | 0.56975400  |
| H | -4.77964500 | 0.16756800  | -2.56356700 |
| H | -6.51257200 | -0.62286400 | -4.14233300 |
| H | -8.29182000 | -2.97511700 | -1.01463700 |
| H | -8.26821600 | -2.20567600 | -3.37540300 |

|   |             |            |             |
|---|-------------|------------|-------------|
| C | 0.93239200  | 3.58754900 | -0.49029600 |
| O | 0.00794200  | 3.46729200 | -1.26772500 |
| O | 1.27816800  | 2.72221000 | 0.44999500  |
| H | 0.70219300  | 1.91612500 | 0.44041300  |
| O | 1.77054700  | 4.62375100 | -0.42615400 |
| C | 1.52110500  | 5.82129100 | -1.22239100 |
| C | 1.66351100  | 5.51616200 | -2.70954100 |
| H | 2.65463900  | 5.09971700 | -2.91764200 |
| H | 1.55873400  | 6.44655200 | -3.27723800 |
| H | 0.89875800  | 4.81287900 | -3.04531800 |
| C | 0.15286300  | 6.40352800 | -0.88063800 |
| H | -0.65676500 | 5.77416800 | -1.25374600 |
| H | 0.06167800  | 7.39593600 | -1.33321900 |
| H | 0.05177500  | 6.51163100 | 0.20458000  |
| C | 2.62779400  | 6.76322500 | -0.76413800 |
| H | 3.60951800  | 6.31725600 | -0.95032800 |
| H | 2.53542900  | 6.97105500 | 0.30624200  |
| H | 2.56265000  | 7.70789500 | -1.31168200 |

Zero-point correction= 1.075624 (Hartree/Particle)

Thermal correction to Energy= 1.141612

Thermal correction to Enthalpy= 1.142557

Thermal correction to Gibbs Free Energy= 0.970641

Sum of electronic and zero-point Energies= -2890.099043

Sum of electronic and thermal Energies= -2890.033054

Sum of electronic and thermal Enthalpies= -2890.032110

Sum of electronic and thermal Free Energies= -2890.204026

E(RM062X/6-311+G(2d,p)) = -2892.08032741

#### **RR-TS4-CONF6**

|   |            |             |             |
|---|------------|-------------|-------------|
| C | 1.07769600 | -0.51414000 | -0.58588000 |
|---|------------|-------------|-------------|

|   |             |             |             |
|---|-------------|-------------|-------------|
| H | 0.25571600  | -0.07536700 | -1.14144700 |
| H | 1.06273400  | -1.59849200 | -0.55248200 |
| C | 2.34251000  | 0.08817600  | -0.72986100 |
| C | 2.52665400  | 1.37397600  | -1.32313900 |
| O | 3.58348300  | 2.00230000  | -1.38216200 |
| O | 1.38450100  | 1.90500500  | -1.87953200 |
| C | 1.52789900  | 3.22039400  | -2.40391100 |
| H | 1.81844800  | 3.90575300  | -1.59706400 |
| H | 2.33122000  | 3.23802300  | -3.14749400 |
| C | 0.20303900  | 3.62203900  | -3.01643100 |
| H | -0.60337500 | 3.53281500  | -2.28216300 |
| H | -0.04032300 | 2.98264800  | -3.87081000 |
| H | 0.24894800  | 4.65921300  | -3.36366500 |
| C | 3.56411000  | -0.58422300 | -0.22518600 |
| H | 3.32764800  | -1.38447400 | 0.48098800  |
| H | 4.26304900  | 0.10669900  | 0.25275900  |
| N | 0.86799300  | 2.59663200  | 0.87238600  |
| C | 2.06880300  | 3.02762800  | 1.30923700  |
| H | 2.77375300  | 2.24801000  | 1.56860500  |
| C | 2.33965700  | 4.36581800  | 1.41416900  |
| H | 3.31602000  | 4.66697100  | 1.76825700  |
| C | -0.09045800 | 3.46608200  | 0.49174700  |
| H | -1.00327000 | 3.02465900  | 0.10654600  |
| C | 0.10748200  | 4.81746300  | 0.57527400  |
| H | -0.68853500 | 5.47738100  | 0.25780600  |
| C | 1.34994100  | 5.32543100  | 1.05651500  |
| N | 1.57707100  | 6.64361500  | 1.15815000  |
| C | 2.87034100  | 7.13032400  | 1.62364400  |
| H | 2.85219800  | 8.21870700  | 1.63173300  |
| H | 3.67630600  | 6.79804400  | 0.96080300  |

|   |             |             |             |
|---|-------------|-------------|-------------|
| H | 3.07814200  | 6.77704200  | 2.63896200  |
| C | 0.54688200  | 7.59662900  | 0.76457000  |
| H | 0.30537000  | 7.49816200  | -0.29951300 |
| H | 0.91461600  | 8.60502200  | 0.94576400  |
| H | -0.36598600 | 7.44847900  | 1.35065100  |
| N | 0.24153700  | -0.33156600 | 1.07005400  |
| N | -0.92420700 | -1.10748000 | 1.10062500  |
| C | -0.80110300 | -2.46224600 | 0.84986800  |
| O | 0.24695000  | -3.07392400 | 0.83033400  |
| O | -1.99758400 | -3.00820800 | 0.58763900  |
| C | -2.06312500 | -4.45257600 | 0.55134000  |
| H | -1.19870700 | -4.80597600 | -0.01714400 |
| C | -2.02497600 | -4.99313900 | 1.97022700  |
| H | -2.87364300 | -4.60503100 | 2.54246200  |
| H | -1.09923000 | -4.69886100 | 2.47237500  |
| H | -2.07918000 | -6.08611600 | 1.95412800  |
| C | -3.35260300 | -4.78367400 | -0.17374400 |
| H | -4.21444500 | -4.44302800 | 0.40981400  |
| H | -3.43256800 | -5.86602500 | -0.31061200 |
| H | -3.37895100 | -4.30319400 | -1.15642800 |
| C | 1.09754200  | -0.49453000 | 2.13577400  |
| O | 2.10946700  | 0.18928900  | 2.24419800  |
| O | 0.74727000  | -1.42815100 | 3.03465600  |
| C | 1.63618400  | -1.62571000 | 4.15321300  |
| H | 2.66216000  | -1.55625300 | 3.78109000  |
| C | 1.34275100  | -3.02633100 | 4.65519800  |
| H | 1.52783600  | -3.76198000 | 3.86755500  |
| H | 0.29530300  | -3.10297100 | 4.96612800  |
| H | 1.98068700  | -3.26036100 | 5.51275100  |
| C | 1.39460700  | -0.55822200 | 5.20802000  |

|   |             |             |             |
|---|-------------|-------------|-------------|
| H | 0.37612300  | -0.63553700 | 5.60361800  |
| H | 1.54024400  | 0.43996100  | 4.78648300  |
| H | 2.09706100  | -0.68965600 | 6.03729900  |
| C | -2.23099600 | -0.49067600 | 1.33851800  |
| C | -2.09450100 | 0.89163300  | 2.03607200  |
| H | -1.30899000 | 1.39713200  | 1.48074300  |
| C | -1.65683700 | 0.77734200  | 3.49811900  |
| H | -1.20128000 | 1.72339700  | 3.81056600  |
| H | -0.94078300 | -0.03024600 | 3.65019700  |
| H | -2.51342500 | 0.58067700  | 4.15075000  |
| C | -3.36022900 | 1.74117500  | 1.92192200  |
| H | -4.22806000 | 1.24994900  | 2.37601200  |
| H | -3.59976900 | 1.98193100  | 0.88189500  |
| H | -3.19811400 | 2.68389900  | 2.45520000  |
| C | -3.15220500 | -1.41834900 | 2.19583700  |
| O | -2.81717600 | -1.88277900 | 3.26615700  |
| C | -4.41396200 | -1.53201600 | 1.48939700  |
| H | -5.30665100 | -2.00772700 | 1.87155400  |
| C | -4.29357700 | -0.93836400 | 0.27488600  |
| N | -3.03500800 | -0.37583200 | 0.09743400  |
| C | -2.49961400 | 0.22530900  | -1.03214200 |
| O | -1.64140700 | 1.08482200  | -0.95504400 |
| O | -3.00816200 | -0.28702300 | -2.14184300 |
| C | -2.67829200 | 0.27088300  | -3.45855000 |
| C | -3.51266000 | -0.59258100 | -4.39465100 |
| H | -3.20968800 | -1.64149000 | -4.32109900 |
| H | -3.37330800 | -0.25899500 | -5.42698300 |
| H | -4.57469500 | -0.51429500 | -4.13912900 |
| C | -3.12105100 | 1.72683200  | -3.53283500 |
| H | -2.58895800 | 2.34289900  | -2.80548500 |

|   |             |             |             |
|---|-------------|-------------|-------------|
| H | -4.19880900 | 1.80587600  | -3.35698900 |
| H | -2.90827800 | 2.11254100  | -4.53506400 |
| C | -1.18930900 | 0.09487000  | -3.73254400 |
| H | -0.57786700 | 0.74168400  | -3.09914500 |
| H | -0.99093300 | 0.33866600  | -4.78167300 |
| H | -0.89827700 | -0.94774000 | -3.56500700 |
| C | -5.39006600 | -0.77693300 | -0.70154100 |
| C | -7.54604400 | -0.46870000 | -2.44767600 |
| C | -5.69169000 | 0.48369400  | -1.23025900 |
| C | -6.17964900 | -1.87723100 | -1.04133800 |
| C | -7.25037000 | -1.72288700 | -1.91963200 |
| C | -6.76864700 | 0.63636400  | -2.09535000 |
| H | -5.09018100 | 1.34576100  | -0.95071800 |
| H | -5.94267300 | -2.85417100 | -0.62992000 |
| H | -7.85222700 | -2.58489000 | -2.19007900 |
| H | -7.00347000 | 1.61822000  | -2.49542700 |
| H | -8.38234900 | -0.34874800 | -3.12956200 |
| C | 5.42541800  | -1.79743600 | -1.02958700 |
| O | 5.89453300  | -1.87326400 | 0.08681600  |
| O | 4.28774800  | -1.20121500 | -1.34821100 |
| O | 5.95683200  | -2.29866800 | -2.14945300 |
| C | 7.22164900  | -3.02180400 | -2.10149800 |
| C | 8.33776000  | -2.10185600 | -1.61760500 |
| H | 8.35757900  | -1.18726000 | -2.21933500 |
| H | 9.30024500  | -2.61026600 | -1.73393900 |
| H | 8.20655000  | -1.83490500 | -0.56800200 |
| C | 7.08391200  | -4.27126500 | -1.23771400 |
| H | 6.94759900  | -4.01560500 | -0.18595200 |
| H | 7.98822200  | -4.88004200 | -1.33749300 |
| H | 6.22971000  | -4.86806000 | -1.57416200 |

|                                              |            |             |                             |
|----------------------------------------------|------------|-------------|-----------------------------|
| C                                            | 7.44351400 | -3.40568000 | -3.55949300                 |
| H                                            | 7.50031800 | -2.51053400 | -4.18636800                 |
| H                                            | 6.62170900 | -4.03235100 | -3.91933700                 |
| H                                            | 8.37904800 | -3.96354700 | -3.65995300                 |
| H                                            | 0.69077000 | 1.58193900  | 0.79930500                  |
| Zero-point correction=                       |            |             | 1.076225 (Hartree/Particle) |
| Thermal correction to Energy=                |            |             | 1.142130                    |
| Thermal correction to Enthalpy=              |            |             | 1.143074                    |
| Thermal correction to Gibbs Free Energy=     |            |             | 0.971136                    |
| Sum of electronic and zero-point Energies=   |            |             | -2890.090926                |
| Sum of electronic and thermal Energies=      |            |             | -2890.025021                |
| Sum of electronic and thermal Enthalpies=    |            |             | -2890.024077                |
| Sum of electronic and thermal Free Energies= |            |             | -2890.196015                |
| E(RM062X/6-311+G(2d,p)) =                    |            |             | -2892.07067193              |

#### **RR-TS5**

|   |            |             |            |
|---|------------|-------------|------------|
| C | 1.33173000 | -0.74610200 | 0.60620900 |
| H | 1.21116000 | -0.88423800 | 1.68290700 |
| H | 0.71576800 | 0.11072500  | 0.31999700 |
| C | 2.76261400 | -0.49032500 | 0.24789800 |
| C | 3.84659300 | -0.87907200 | 1.11463100 |
| O | 5.04608900 | -0.72430900 | 0.89154600 |
| O | 3.43257100 | -1.45217000 | 2.27968400 |
| C | 4.45141100 | -1.73839100 | 3.23542000 |
| H | 5.20293000 | -2.40216500 | 2.79722000 |
| H | 4.95971700 | -0.80846200 | 3.51495800 |
| C | 3.77852100 | -2.38242100 | 4.42843800 |
| H | 3.27812700 | -3.30936200 | 4.13253700 |
| H | 3.03210300 | -1.71017000 | 4.86196600 |
| H | 4.52083100 | -2.61841300 | 5.19656600 |



|   |             |             |             |
|---|-------------|-------------|-------------|
| C | 3.08792300  | 0.22518900  | -0.90011300 |
| H | 2.35791400  | 0.26766200  | -1.70324600 |
| H | 4.12561600  | 0.21393300  | -1.22454200 |
| N | 3.01907700  | 2.09864800  | -0.61106100 |
| C | 3.12557300  | 2.98447100  | -1.60695700 |
| H | 3.30962900  | 2.57317800  | -2.59781000 |
| C | 3.01221400  | 4.34373700  | -1.40989900 |
| H | 3.10599200  | 5.00866000  | -2.25872700 |
| C | 2.80001500  | 2.53695800  | 0.62570900  |
| H | 2.71956700  | 1.75605000  | 1.38393600  |
| C | 2.67493500  | 3.87548600  | 0.93481100  |
| H | 2.49759700  | 4.16476000  | 1.96273900  |
| C | 2.77668600  | 4.84079400  | -0.10030100 |
| N | 2.65380600  | 6.16507800  | 0.14607300  |
| C | 2.76776900  | 7.12268100  | -0.94239400 |
| H | 2.65084400  | 8.12854400  | -0.54111700 |
| H | 1.99143500  | 6.95916200  | -1.69884100 |
| H | 3.74784100  | 7.05591600  | -1.42858800 |
| C | 2.41012400  | 6.63017200  | 1.50186100  |
| H | 2.33703100  | 7.71668900  | 1.49431400  |
| H | 3.22680700  | 6.34189900  | 2.17374900  |
| H | 1.47286600  | 6.22263000  | 1.89861400  |
| N | 0.65765900  | -1.89759100 | -0.08813000 |
| N | -0.59507800 | -1.67417100 | -0.61628600 |
| C | -0.72215600 | -1.16935100 | -1.89590500 |
| O | -1.80100200 | -0.98683700 | -2.42369200 |
| O | 0.45853800  | -0.89291600 | -2.45304200 |
| C | 0.40675400  | -0.33435300 | -3.79058200 |
| H | -0.41511900 | -0.82387500 | -4.31855800 |
| C | 0.14848000  | 1.15880300  | -3.69334500 |

|   |             |             |             |
|---|-------------|-------------|-------------|
| H | 0.94246500  | 1.64652600  | -3.11597100 |
| H | -0.81180600 | 1.35230800  | -3.20713700 |
| H | 0.12560500  | 1.60109600  | -4.69405900 |
| C | 1.72885100  | -0.68035000 | -4.44583300 |
| H | 2.56655700  | -0.20698200 | -3.92285300 |
| H | 1.72588200  | -0.32617700 | -5.48095500 |
| H | 1.88243600  | -1.76290500 | -4.44897900 |
| C | 1.32826400  | -2.99409500 | -0.59314700 |
| O | 0.95037800  | -3.66655800 | -1.53072600 |
| O | 2.42440500  | -3.24021300 | 0.13217100  |
| C | 3.42307700  | -4.08447800 | -0.47964700 |
| H | 2.91775700  | -4.97341700 | -0.86835100 |
| C | 4.38565300  | -4.44620300 | 0.63346200  |
| H | 4.90003100  | -3.54375700 | 0.97999900  |
| H | 5.13418100  | -5.15297300 | 0.26309000  |
| H | 3.85774400  | -4.90350600 | 1.47539000  |
| C | 4.11180700  | -3.32429300 | -1.60277300 |
| H | 4.63566400  | -2.45483000 | -1.19070100 |
| H | 3.38690900  | -2.98686900 | -2.34946200 |
| H | 4.84142400  | -3.97296000 | -2.09804800 |
| C | -1.82168700 | -2.04741800 | 0.09838400  |
| C | -1.49744100 | -2.79247600 | 1.42261200  |
| H | -0.66046300 | -2.24695500 | 1.86582100  |
| C | -1.08007100 | -4.25020500 | 1.19850900  |
| H | -0.53890600 | -4.60369700 | 2.08173800  |
| H | -0.45144000 | -4.38766000 | 0.31750800  |
| H | -1.96035700 | -4.88694700 | 1.06365400  |
| C | -2.66513100 | -2.72939800 | 2.40859100  |
| H | -3.59030900 | -3.12038600 | 1.96969800  |
| H | -2.84350600 | -1.70919500 | 2.75843900  |

|   |             |             |             |
|---|-------------|-------------|-------------|
| H | -2.42561600 | -3.34674000 | 3.28025700  |
| C | -2.76414500 | -2.89672800 | -0.81860700 |
| O | -2.41110500 | -3.91895000 | -1.36645500 |
| C | -4.06178200 | -2.24889400 | -0.81400300 |
| H | -4.96328600 | -2.64680100 | -1.25838600 |
| C | -3.95529100 | -1.06268400 | -0.16730500 |
| N | -2.67496000 | -0.85919800 | 0.33684400  |
| C | -2.13942500 | 0.29629600  | 0.89050300  |
| O | -1.24687500 | 0.25790800  | 1.71202000  |
| O | -2.69503500 | 1.38659300  | 0.37591900  |
| C | -2.36644600 | 2.71580500  | 0.89762000  |
| C | -3.23216100 | 3.62612900  | 0.03743200  |
| H | -2.95264700 | 3.53751700  | -1.01697200 |
| H | -3.10090300 | 4.66613800  | 0.34968400  |
| H | -4.28813000 | 3.35709200  | 0.14421400  |
| C | -2.76740700 | 2.81703200  | 2.36438400  |
| H | -2.20230100 | 2.11584800  | 2.98203800  |
| H | -3.83799100 | 2.62168000  | 2.48074500  |
| H | -2.56403300 | 3.83254400  | 2.71880500  |
| C | -0.88415100 | 3.01046600  | 0.68361900  |
| H | -0.25940400 | 2.42819200  | 1.36275800  |
| H | -0.70392900 | 4.07538800  | 0.86544400  |
| H | -0.59531700 | 2.78666200  | -0.34971000 |
| C | -5.07515800 | -0.14205700 | 0.10962900  |
| C | -7.27981100 | 1.48805700  | 0.63791700  |
| C | -5.98526100 | 0.15856200  | -0.90654700 |
| C | -5.27729300 | 0.37231100  | 1.39576400  |
| C | -6.37859000 | 1.17915900  | 1.65819900  |
| C | -7.08086700 | 0.97748800  | -0.64270100 |
| H | -5.82142500 | -0.23631500 | -1.90493300 |

|                                              |             |            |                             |
|----------------------------------------------|-------------|------------|-----------------------------|
| H                                            | -4.57986800 | 0.12793100 | 2.19384500                  |
| H                                            | -6.53517600 | 1.56654800 | 2.66053500                  |
| H                                            | -7.77789000 | 1.21605800 | -1.43999700                 |
| H                                            | -8.13618700 | 2.12287900 | 0.84404700                  |
| Zero-point correction=                       |             |            | 0.920249 (Hartree/Particle) |
| Thermal correction to Energy=                |             |            | 0.975997                    |
| Thermal correction to Enthalpy=              |             |            | 0.976941                    |
| Thermal correction to Gibbs Free Energy=     |             |            | 0.827568                    |
| Sum of electronic and zero-point Energies=   |             |            | -2468.164316                |
| Sum of electronic and thermal Energies=      |             |            | -2468.108568                |
| Sum of electronic and thermal Enthalpies=    |             |            | -2468.107624                |
| Sum of electronic and thermal Free Energies= |             |            | -2468.256997                |
| E(RM062X/6-311+G(2d,p)) =                    |             |            | -2469.84517810              |

**RS-TS4-CONF1**

|   |             |             |             |
|---|-------------|-------------|-------------|
| C | -2.27025800 | 0.60104300  | -0.83724100 |
| H | -2.01715000 | 1.24281100  | -1.67260700 |
| H | -2.07952100 | -0.45469600 | -1.00743800 |
| C | -3.32916400 | 0.97944800  | -0.03135700 |
| C | -3.89515100 | 2.30548200  | -0.06823200 |
| O | -4.80390900 | 2.71039500  | 0.65534400  |
| O | -3.35894300 | 3.09624400  | -1.02723200 |
| C | -3.78435300 | 4.45806400  | -1.03565700 |
| H | -3.56223300 | 4.91044700  | -0.06383400 |
| H | -4.86856600 | 4.50047000  | -1.18676800 |
| C | -3.03647200 | 5.15597300  | -2.15053900 |
| H | -1.96036500 | 5.11252900  | -1.96344800 |
| H | -3.24956800 | 4.68212800  | -3.11381300 |
| H | -3.34422200 | 6.20472400  | -2.20680200 |
| C | -3.75525200 | 0.11445100  | 1.10646500  |

|   |             |             |             |
|---|-------------|-------------|-------------|
| H | -2.91769700 | -0.46698100 | 1.49746500  |
| H | -4.19462500 | 0.71173600  | 1.90749600  |
| N | -4.79577900 | -0.88935500 | 0.71864800  |
| C | -4.48371100 | -2.19269100 | 0.57314500  |
| H | -3.45132000 | -2.45544100 | 0.78459300  |
| C | -5.41345600 | -3.11558700 | 0.16906900  |
| H | -5.10201100 | -4.14659300 | 0.06763800  |
| C | -6.04687500 | -0.46055900 | 0.44201100  |
| H | -6.20563600 | 0.60798400  | 0.55642900  |
| C | -7.03146700 | -1.32093200 | 0.04117900  |
| H | -8.01540800 | -0.91941900 | -0.16045100 |
| C | -6.74814600 | -2.70932200 | -0.10544900 |
| N | -7.69180600 | -3.58521000 | -0.48580200 |
| C | -7.36165000 | -4.99715700 | -0.62930400 |
| H | -8.25941500 | -5.53892000 | -0.92249800 |
| H | -6.59637700 | -5.14598500 | -1.39873500 |
| H | -6.99779700 | -5.41160700 | 0.31682200  |
| C | -9.04614700 | -3.12627900 | -0.76741700 |
| H | -9.65448000 | -3.98373200 | -1.04973900 |
| H | -9.49275800 | -2.65740800 | 0.11580500  |
| H | -9.05362500 | -2.40624800 | -1.59283700 |
| N | -0.50257900 | 0.70788200  | 0.08756500  |
| C | -0.63178600 | 1.04363000  | 1.38256000  |
| O | -1.27679000 | 2.05657700  | 1.71514300  |
| O | -0.09874200 | 0.22278700  | 2.30271700  |
| C | -0.11649700 | 0.68861000  | 3.66560300  |
| H | -1.06910000 | 1.19666800  | 3.83711500  |
| C | -0.02738900 | -0.55125000 | 4.53432800  |
| H | 0.90930900  | -1.08564400 | 4.34917500  |
| H | -0.06377400 | -0.27020500 | 5.59132400  |

|   |             |             |             |
|---|-------------|-------------|-------------|
| H | -0.86080400 | -1.22837300 | 4.32375300  |
| C | 1.03488000  | 1.65790500  | 3.87214600  |
| H | 1.98689000  | 1.15297800  | 3.67982700  |
| H | 0.94492900  | 2.50106200  | 3.18064100  |
| H | 1.03245000  | 2.03858500  | 4.89897400  |
| C | 0.37472300  | 4.37308100  | 0.21066900  |
| O | 1.18439400  | 3.86106400  | 0.96079900  |
| O | -0.87381300 | 3.99477000  | 0.04735100  |
| H | -1.06247700 | 3.19491100  | 0.64257200  |
| O | 0.60766400  | 5.42559200  | -0.58678200 |
| C | 1.88706600  | 6.11908400  | -0.54100000 |
| C | 3.00543200  | 5.19684700  | -1.01320100 |
| H | 2.78714500  | 4.82800600  | -2.02123100 |
| H | 3.94604700  | 5.75617000  | -1.05130100 |
| H | 3.12756200  | 4.34836400  | -0.33725900 |
| C | 2.14281800  | 6.66862600  | 0.85913400  |
| H | 2.33279200  | 5.86706100  | 1.57417500  |
| H | 3.01348900  | 7.33154100  | 0.83271600  |
| H | 1.27881600  | 7.25089500  | 1.19636800  |
| C | 1.68671200  | 7.26145000  | -1.52969500 |
| H | 1.44537600  | 6.86868700  | -2.52225600 |
| H | 0.86917400  | 7.91160400  | -1.20319200 |
| H | 2.60104400  | 7.85766500  | -1.60197300 |
| N | 0.27976400  | -0.41283000 | -0.18544900 |
| C | -0.23897700 | -1.64971700 | 0.10388300  |
| O | -1.25834700 | -1.84801700 | 0.74502500  |
| O | 0.53172700  | -2.63210200 | -0.38733400 |
| C | 0.02608200  | -3.98042400 | -0.28080800 |
| H | -0.38422800 | -4.10308800 | 0.72534800  |
| C | -1.05313300 | -4.19736300 | -1.32794300 |

|   |             |             |             |
|---|-------------|-------------|-------------|
| H | -0.64059200 | -4.02964900 | -2.32859500 |
| H | -1.89142000 | -3.51212200 | -1.17426000 |
| H | -1.42807800 | -5.22421300 | -1.27303800 |
| C | 1.22991500  | -4.87900600 | -0.48431900 |
| H | 1.61651600  | -4.76533800 | -1.50245100 |
| H | 0.94495000  | -5.92459500 | -0.33550900 |
| H | 2.02474600  | -4.62554100 | 0.22344400  |
| C | 1.42009300  | -0.24983900 | -1.09770700 |
| C | 1.77304700  | 1.25891900  | -1.31438500 |
| H | 1.63611100  | 1.72501900  | -0.33493400 |
| C | 0.86537900  | 1.96768400  | -2.32052200 |
| H | -0.18927100 | 1.78390000  | -2.12650300 |
| H | 1.09117100  | 1.65871800  | -3.34710700 |
| H | 1.04071700  | 3.04755300  | -2.24785300 |
| C | 3.23552400  | 1.44555800  | -1.73122700 |
| H | 3.49710300  | 0.83801600  | -2.60561000 |
| H | 3.92511600  | 1.20666700  | -0.91706600 |
| H | 3.39279900  | 2.49356300  | -2.00326200 |
| C | 1.14433400  | -0.97980500 | -2.44303700 |
| O | 0.11641600  | -0.82589500 | -3.07482200 |
| C | 2.30510700  | -1.79741400 | -2.73001000 |
| H | 2.49949500  | -2.32582600 | -3.65325100 |
| C | 3.12425900  | -1.77623600 | -1.64505100 |
| N | 2.62341400  | -0.97371900 | -0.62852200 |
| C | 3.05005500  | -0.87263200 | 0.68968100  |
| O | 2.78589300  | 0.08586900  | 1.38098500  |
| O | 3.72970600  | -1.95941800 | 1.05045900  |
| C | 4.47591200  | -2.00533500 | 2.30758700  |
| C | 5.16929300  | -3.35921700 | 2.23121900  |
| H | 4.43222700  | -4.16688400 | 2.18343400  |

|   |            |             |             |
|---|------------|-------------|-------------|
| H | 5.79177500 | -3.50687300 | 3.11855600  |
| H | 5.80558300 | -3.41123800 | 1.34144700  |
| C | 5.50071300 | -0.87817100 | 2.35856000  |
| H | 5.01834700 | 0.10139100  | 2.34877800  |
| H | 6.19108300 | -0.95103700 | 1.51237300  |
| H | 6.08145200 | -0.96886500 | 3.28192200  |
| C | 3.50585900 | -1.95398700 | 3.48069900  |
| H | 3.05433700 | -0.96475900 | 3.57095800  |
| H | 4.04321000 | -2.18461400 | 4.40614300  |
| H | 2.71319600 | -2.69757300 | 3.34557500  |
| C | 4.46444000 | -2.39646300 | -1.59673900 |
| C | 7.01828100 | -3.52386800 | -1.65906100 |
| C | 4.64070400 | -3.70929200 | -2.03785400 |
| C | 5.57548600 | -1.64365000 | -1.19843100 |
| C | 6.84662300 | -2.20417200 | -1.23598300 |
| C | 5.91489500 | -4.27365200 | -2.05852900 |
| H | 3.77806300 | -4.29030100 | -2.35055300 |
| H | 5.44001800 | -0.61571200 | -0.87120800 |
| H | 7.70552500 | -1.61183900 | -0.93466100 |
| H | 6.04297300 | -5.29949600 | -2.38995600 |
| H | 8.01133100 | -3.96236100 | -1.68056900 |

Zero-point correction= 1.075846 (Hartree/Particle)

Thermal correction to Energy= 1.141594

Thermal correction to Enthalpy= 1.142539

Thermal correction to Gibbs Free Energy= 0.971931

Sum of electronic and zero-point Energies= -2890.102708

Sum of electronic and thermal Energies= -2890.036960

Sum of electronic and thermal Enthalpies= -2890.036015

Sum of electronic and thermal Free Energies= -2890.206623

E(RM062X/6-311+G(2d,p)) = -2892.08229609



**RS-TS4-CONF2**

|   |             |             |             |
|---|-------------|-------------|-------------|
| C | -2.30094500 | 0.50324800  | -0.90766500 |
| H | -2.05691100 | 1.15425600  | -1.73836800 |
| H | -2.06463800 | -0.54356900 | -1.07260400 |
| C | -3.38451800 | 0.83558100  | -0.11570400 |
| C | -3.99143000 | 2.14365000  | -0.14226300 |
| O | -4.91957800 | 2.51106400  | 0.57666500  |
| O | -3.46720200 | 2.96315400  | -1.08372400 |
| C | -3.93115100 | 4.31242200  | -1.07711500 |
| H | -3.75250800 | 4.74909000  | -0.08962000 |
| H | -5.01080500 | 4.32761600  | -1.26319400 |
| C | -3.16751800 | 5.05494900  | -2.15156600 |
| H | -2.09761200 | 5.03871500  | -1.92755900 |
| H | -3.33344100 | 4.59567600  | -3.13107200 |
| H | -3.50366000 | 6.09546400  | -2.19717300 |
| C | -3.78911500 | -0.05675400 | 1.00875200  |
| H | -2.93724000 | -0.62814900 | 1.38419500  |
| H | -4.23520500 | 0.51635000  | 1.82362600  |
| N | -4.81177900 | -1.07406400 | 0.60912200  |
| C | -4.46748700 | -2.36264800 | 0.41288500  |
| H | -3.42353000 | -2.60299800 | 0.59192100  |
| C | -5.38058600 | -3.29760700 | -0.00054900 |
| H | -5.04423400 | -4.31573600 | -0.14294500 |
| C | -6.07957700 | -0.67129100 | 0.37248500  |
| H | -6.26458100 | 0.38817500  | 0.52527000  |
| C | -7.04857700 | -1.54496700 | -0.03781800 |
| H | -8.04763100 | -1.16479300 | -0.20363800 |
| C | -6.73098000 | -2.91939200 | -0.23538500 |
| N | -7.65818100 | -3.80812400 | -0.62639200 |

|   |             |             |             |
|---|-------------|-------------|-------------|
| C | -7.29751600 | -5.20822700 | -0.80717000 |
| H | -8.19032300 | -5.76701600 | -1.08329700 |
| H | -6.55175600 | -5.32410300 | -1.60122900 |
| H | -6.89616300 | -5.63058200 | 0.11997000  |
| C | -9.02604100 | -3.37457900 | -0.88093500 |
| H | -9.61139800 | -4.23440400 | -1.20195600 |
| H | -9.48184500 | -2.95948600 | 0.02439900  |
| H | -9.05688900 | -2.61781000 | -1.67209700 |
| N | -0.55269200 | 0.68361500  | 0.04706900  |
| C | -0.70922500 | 0.96655100  | 1.35147300  |
| O | -1.41605100 | 1.92643700  | 1.71624400  |
| O | -0.12890400 | 0.14952800  | 2.24597600  |
| C | -0.18088800 | 0.56027500  | 3.62523100  |
| H | -1.15824100 | 1.01466400  | 3.80717300  |
| C | -0.03751300 | -0.70758200 | 4.44506400  |
| H | 0.92123000  | -1.19276500 | 4.23745100  |
| H | -0.08327700 | -0.47068000 | 5.51251200  |
| H | -0.84182800 | -1.41108000 | 4.20866500  |
| C | 0.92102400  | 1.57445000  | 3.88118900  |
| H | 1.89777400  | 1.12151700  | 3.68272400  |
| H | 0.79921000  | 2.43718800  | 3.21917600  |
| H | 0.88986100  | 1.91653200  | 4.92099500  |
| C | 0.13984800  | 4.37013000  | 0.33999100  |
| O | 0.97415100  | 3.83970200  | 1.04975200  |
| O | -1.09844000 | 3.96345400  | 0.16822200  |
| H | -1.25219500 | 3.12159700  | 0.71559600  |
| O | 0.33196000  | 5.47441400  | -0.39577700 |
| C | 1.58756000  | 6.20718900  | -0.31575600 |
| C | 2.73380000  | 5.35467300  | -0.84848100 |
| H | 2.52345000  | 5.04184700  | -1.87694400 |

|   |             |             |             |
|---|-------------|-------------|-------------|
| H | 3.65473200  | 5.94709300  | -0.85419900 |
| H | 2.88806800  | 4.47045600  | -0.22706800 |
| C | 1.83516200  | 6.68047900  | 1.11346700  |
| H | 2.06302400  | 5.84542200  | 1.77718300  |
| H | 2.67933300  | 7.37729100  | 1.12114400  |
| H | 0.95261000  | 7.20710500  | 1.49167100  |
| C | 1.34090200  | 7.39948800  | -1.23245900 |
| H | 1.10263200  | 7.05927700  | -2.24496600 |
| H | 0.50619900  | 8.00216700  | -0.86126400 |
| H | 2.23494300  | 8.02839300  | -1.27582700 |
| N | 0.28705700  | -0.38868800 | -0.24840400 |
| C | -0.16276400 | -1.65651700 | 0.02475900  |
| O | -1.17902500 | -1.91905500 | 0.64806600  |
| O | 0.66761000  | -2.58780600 | -0.46800500 |
| C | 0.41094600  | -3.96185300 | -0.10587200 |
| H | -0.65973800 | -4.14790800 | -0.23051700 |
| C | 1.22218300  | -4.79129200 | -1.08149600 |
| H | 2.28999000  | -4.58553200 | -0.94717000 |
| H | 0.94508000  | -4.56133500 | -2.11456500 |
| H | 1.04773400  | -5.85575300 | -0.89916100 |
| C | 0.83039500  | -4.18669300 | 1.33675700  |
| H | 1.89655600  | -3.95988400 | 1.44370300  |
| H | 0.66212800  | -5.23058800 | 1.61926300  |
| H | 0.26002300  | -3.54402300 | 2.01262700  |
| C | 1.42043700  | -0.14226500 | -1.15153700 |
| C | 1.71639100  | 1.38712700  | -1.30209400 |
| H | 1.55585500  | 1.80474600  | -0.30468800 |
| C | 0.79137300  | 2.10678400  | -2.28497200 |
| H | -0.25889200 | 1.88469000  | -2.10556700 |
| H | 1.03200500  | 1.84755100  | -3.32182300 |

|   |            |             |             |
|---|------------|-------------|-------------|
| H | 0.93345600 | 3.18759900  | -2.16694800 |
| C | 3.17356400 | 1.64416400  | -1.70091000 |
| H | 3.46014600 | 1.08404000  | -2.59895000 |
| H | 3.86831400 | 1.39501900  | -0.89427000 |
| H | 3.29407300 | 2.70780900  | -1.92773000 |
| C | 1.16902600 | -0.82070600 | -2.52704300 |
| O | 0.13951600 | -0.66635600 | -3.15643500 |
| C | 2.35228900 | -1.59149500 | -2.84497800 |
| H | 2.56222700 | -2.07569500 | -3.78879300 |
| C | 3.17171900 | -1.58842700 | -1.75976800 |
| N | 2.65158500 | -0.83867300 | -0.71339800 |
| C | 3.05538600 | -0.79790300 | 0.61545600  |
| O | 2.76582900 | 0.12248400  | 1.34710400  |
| O | 3.74570900 | -1.89118200 | 0.93763200  |
| C | 4.49996500 | -1.96763200 | 2.19039500  |
| C | 5.19189800 | -3.31924700 | 2.07512700  |
| H | 4.45371200 | -4.12539000 | 2.01243700  |
| H | 5.82083000 | -3.48990000 | 2.95375200  |
| H | 5.82165600 | -3.34969800 | 1.17972500  |
| C | 5.52419200 | -0.84076500 | 2.26045900  |
| H | 5.04004700 | 0.13833300  | 2.25746100  |
| H | 6.22301100 | -0.90321300 | 1.42085000  |
| H | 6.09594800 | -0.93964000 | 3.18858200  |
| C | 3.54638900 | -1.94224000 | 3.37821900  |
| H | 3.09298600 | -0.95683200 | 3.49612100  |
| H | 4.10143400 | -2.18876200 | 4.28913100  |
| H | 2.75398000 | -2.68600200 | 3.24564300  |
| C | 4.52839100 | -2.17050000 | -1.73892600 |
| C | 7.11477700 | -3.21633200 | -1.85655300 |
| C | 4.74745400 | -3.44154900 | -2.27516500 |

|   |            |             |             |
|---|------------|-------------|-------------|
| C | 5.61331400 | -1.41704500 | -1.27613300 |
| C | 6.90078900 | -1.93661200 | -1.34061900 |
| C | 6.03759500 | -3.96604000 | -2.32299100 |
| H | 3.90457400 | -4.02051900 | -2.64186700 |
| H | 5.44482600 | -0.41850500 | -0.88037300 |
| H | 7.73924200 | -1.34302500 | -0.98843000 |
| H | 6.19906800 | -4.96009500 | -2.72834800 |
| H | 8.12043000 | -3.62336000 | -1.89917700 |

Zero-point correction= 1.075815 (Hartree/Particle)

Thermal correction to Energy= 1.141496

Thermal correction to Enthalpy= 1.142440

Thermal correction to Gibbs Free Energy= 0.972404

Sum of electronic and zero-point Energies= -2890.102826

Sum of electronic and thermal Energies= -2890.037145

Sum of electronic and thermal Enthalpies= -2890.036201

Sum of electronic and thermal Free Energies= -2890.206237

E(RM062X/6-311+G(2d,p)) = -2892.08209233

#### TBHC

|   |             |             |             |
|---|-------------|-------------|-------------|
| O | 0.14910400  | -0.00002600 | 1.47613300  |
| C | 0.06499400  | -0.00000200 | 0.01311200  |
| C | 0.70207100  | 1.26760600  | -0.54335300 |
| H | 0.26825400  | 2.15009900  | -0.06202800 |
| H | 0.49833000  | 1.32760500  | -1.61693300 |
| H | 1.78276400  | 1.27203900  | -0.39255200 |
| C | 0.70209700  | -1.26757400 | -0.54341400 |
| H | 1.78281000  | -1.27192900 | -0.39276300 |
| H | 0.49820900  | -1.32762600 | -1.61696200 |
| H | 0.26841200  | -2.15008100 | -0.06199600 |
| C | -1.43760900 | -0.00001300 | -0.23328800 |

|                                              |             |             |                             |
|----------------------------------------------|-------------|-------------|-----------------------------|
| H                                            | -1.89853100 | 0.88915300  | 0.20734800                  |
| H                                            | -1.89849700 | -0.88927000 | 0.20719900                  |
| H                                            | -1.63479700 | 0.00007300  | -1.30893700                 |
| C                                            | 1.32938700  | -0.00013200 | 2.07439400                  |
| O                                            | 2.42521600  | -0.00024700 | 1.56228900                  |
| O                                            | 1.12323800  | -0.00012700 | 3.39827400                  |
| H                                            | 2.00163400  | -0.00021700 | 3.82072400                  |
| Zero-point correction=                       |             |             | 0.153467 (Hartree/Particle) |
| Thermal correction to Energy=                |             |             | 0.162481                    |
| Thermal correction to Enthalpy=              |             |             | 0.163425                    |
| Thermal correction to Gibbs Free Energy=     |             |             | 0.120154                    |
| Sum of electronic and zero-point Energies=   |             |             | -421.928149                 |
| Sum of electronic and thermal Energies=      |             |             | -421.919135                 |
| Sum of electronic and thermal Enthalpies=    |             |             | -421.918191                 |
| Sum of electronic and thermal Free Energies= |             |             | -421.961462                 |
| E(RM062X/6-311+G(2d,p)) = -422.230428921     |             |             |                             |

#### TS1-CONF2

|   |             |             |             |
|---|-------------|-------------|-------------|
| C | -2.45433000 | 0.07146400  | -1.18653700 |
| C | -2.54241900 | 1.47935300  | -0.71215700 |
| H | -3.47497900 | 1.67439700  | -0.18529600 |
| H | -2.42793800 | 2.19392800  | -1.52906200 |
| C | -3.18462700 | -0.99325600 | -0.53018800 |
| O | -3.08636800 | -2.18959100 | -0.77393000 |
| O | -4.04646700 | -0.54338700 | 0.42268900  |
| C | -4.80487800 | -1.54878300 | 1.09755600  |
| H | -4.12188500 | -2.25823200 | 1.57618500  |
| H | -5.40171400 | -2.10553000 | 0.36772500  |
| C | -5.68014100 | -0.84773100 | 2.11337800  |
| H | -5.06944900 | -0.29537000 | 2.83354800  |

|   |             |             |             |
|---|-------------|-------------|-------------|
| H | -6.28067900 | -1.58158700 | 2.65873400  |
| H | -6.35699100 | -0.14382400 | 1.62029300  |
| O | -1.51134000 | 1.79339600  | 0.28163000  |
| C | -0.34655400 | 2.20946400  | -0.20844700 |
| O | -0.13023200 | 2.50685800  | -1.36374400 |
| O | 0.52458800  | 2.25055800  | 0.79871700  |
| C | 1.87956300  | 2.74917200  | 0.57670200  |
| C | 1.82838500  | 4.21954100  | 0.17819200  |
| H | 2.84664300  | 4.61903700  | 0.13862400  |
| H | 1.26291700  | 4.79238300  | 0.92038400  |
| H | 1.36499200  | 4.34877200  | -0.80165900 |
| C | 2.52236000  | 2.58333500  | 1.94789900  |
| H | 2.52136800  | 1.52878100  | 2.24265400  |
| H | 1.97437900  | 3.15749600  | 2.70117700  |
| H | 3.55639400  | 2.93862200  | 1.91996000  |
| C | 2.60430400  | 1.89087600  | -0.45421100 |
| H | 2.54171400  | 0.83573000  | -0.16929900 |
| H | 3.66070400  | 2.17776400  | -0.47774100 |
| H | 2.18263000  | 2.01726500  | -1.45213000 |
| C | -1.50497400 | -0.30327200 | -2.12515400 |
| H | -1.05359400 | 0.46423000  | -2.74820700 |
| H | -1.59818400 | -1.28540500 | -2.57938000 |
| N | 0.18671200  | -0.80003200 | -1.28210200 |
| C | 0.19649200  | -0.98049400 | 0.03794500  |
| H | -0.70257900 | -0.65455700 | 0.56121900  |
| C | 1.25377300  | -1.18301700 | -1.99171000 |
| H | 1.19655700  | -1.02512500 | -3.06679200 |
| C | 1.26589200  | -1.53210100 | 0.71463400  |
| H | 1.20711000  | -1.64449900 | 1.78960300  |
| C | 2.41031700  | -1.94731100 | -0.01250600 |

|                                              |            |             |                             |
|----------------------------------------------|------------|-------------|-----------------------------|
| C                                            | 2.37264500 | -1.74997300 | -1.41810600                 |
| H                                            | 3.20398600 | -2.03246600 | -2.05131000                 |
| N                                            | 3.48424100 | -2.49746500 | 0.60166200                  |
| C                                            | 4.65112600 | -2.87853400 | -0.17711300                 |
| H                                            | 5.39249900 | -3.31757600 | 0.48965100                  |
| H                                            | 5.10110900 | -2.01144200 | -0.67591400                 |
| H                                            | 4.39107300 | -3.62199700 | -0.93854900                 |
| C                                            | 3.50508800 | -2.61746900 | 2.05020200                  |
| H                                            | 4.45011100 | -3.06536200 | 2.35423700                  |
| H                                            | 2.68945600 | -3.25670300 | 2.40646200                  |
| H                                            | 3.41410000 | -1.63649800 | 2.53279100                  |
| Zero-point correction=                       |            |             | 0.454705 (Hartree/Particle) |
| Thermal correction to Energy=                |            |             | 0.481879                    |
| Thermal correction to Enthalpy=              |            |             | 0.482823                    |
| Thermal correction to Gibbs Free Energy=     |            |             | 0.395112                    |
| Sum of electronic and zero-point Energies=   |            |             | -1187.457266                |
| Sum of electronic and thermal Energies=      |            |             | -1187.430092                |
| Sum of electronic and thermal Enthalpies=    |            |             | -1187.429147                |
| Sum of electronic and thermal Free Energies= |            |             | -1187.516858                |
| E(RM062X/6-311+G(2d,p)) =                    |            |             | -1188.28856031              |

### TS1-CONF3

|   |             |             |             |
|---|-------------|-------------|-------------|
| C | -1.74482800 | -1.76977800 | -1.06618200 |
| C | -2.23555800 | -0.65228700 | -1.91857500 |
| H | -3.21500100 | -0.29751900 | -1.59547400 |
| H | -2.27817400 | -0.93227400 | -2.97390500 |
| C | -2.29428200 | -2.01980200 | 0.25210600  |
| O | -1.77513900 | -2.70662600 | 1.12449400  |
| O | -3.50570900 | -1.44284700 | 0.44359000  |
| C | -4.02226600 | -1.50471300 | 1.77181500  |



|   |             |             |             |
|---|-------------|-------------|-------------|
| H | -3.27325600 | -1.11200900 | 2.46757900  |
| H | -4.21436800 | -2.54814000 | 2.04361500  |
| C | -5.29010600 | -0.67915600 | 1.79893100  |
| H | -5.07552600 | 0.35778500  | 1.52414000  |
| H | -5.72526000 | -0.69142900 | 2.80252800  |
| H | -6.02759200 | -1.07933200 | 1.09680100  |
| O | -1.33028600 | 0.49884100  | -1.95697200 |
| C | -1.31026600 | 1.26558400  | -0.87333300 |
| O | -1.95797200 | 1.08132700  | 0.13442500  |
| O | -0.45774100 | 2.26641000  | -1.10194400 |
| C | -0.31850200 | 3.34962500  | -0.13265500 |
| C | 0.28258900  | 2.81941500  | 1.16340400  |
| H | 0.46654000  | 3.65575000  | 1.84544800  |
| H | 1.23849900  | 2.32870900  | 0.95539500  |
| H | -0.38831200 | 2.11003100  | 1.65208800  |
| C | 0.65601500  | 4.29436500  | -0.82475700 |
| H | 0.23404500  | 4.65832200  | -1.76650500 |
| H | 1.59838400  | 3.78107200  | -1.03909400 |
| H | 0.86352000  | 5.15262200  | -0.17915300 |
| C | -1.66141500 | 4.03841700  | 0.08718700  |
| H | -2.10165500 | 4.31836400  | -0.87558600 |
| H | -1.50392300 | 4.95143900  | 0.66984300  |
| H | -2.35958300 | 3.39567000  | 0.62523300  |
| C | -0.65585400 | -2.52593000 | -1.45921600 |
| H | -0.36380300 | -2.51985800 | -2.50771300 |
| H | -0.45275600 | -3.44990100 | -0.92590300 |
| N | 1.05439700  | -1.75980800 | -0.87655500 |
| C | 1.02031600  | -0.92405200 | 0.16025600  |
| H | 0.02368100  | -0.64660600 | 0.50549800  |
| C | 2.24074900  | -2.15628000 | -1.34604600 |

|   |            |             |             |
|---|------------|-------------|-------------|
| H | 2.21843900 | -2.84856200 | -2.18542500 |
| C | 2.15940200 | -0.44299800 | 0.77368400  |
| H | 2.06038500 | 0.21958800  | 1.62374700  |
| C | 3.43210600 | -0.83557500 | 0.28702000  |
| C | 3.44012200 | -1.72732900 | -0.81634200 |
| H | 4.36601400 | -2.08264200 | -1.25030700 |
| N | 4.57940500 | -0.38493200 | 0.84789300  |
| C | 5.86318500 | -0.83197800 | 0.33396600  |
| H | 6.65789200 | -0.35289900 | 0.90420200  |
| H | 5.98386800 | -0.56080500 | -0.72108000 |
| H | 5.97516300 | -1.91864500 | 0.42900900  |
| C | 4.52450900 | 0.51617400  | 1.98681300  |
| H | 5.54065700 | 0.77847300  | 2.27898200  |
| H | 4.02646100 | 0.04799900  | 2.84417100  |
| H | 3.98831900 | 1.43893700  | 1.73529400  |

Zero-point correction= 0.454611 (Hartree/Particle)

Thermal correction to Energy= 0.481867

Thermal correction to Enthalpy= 0.482811

Thermal correction to Gibbs Free Energy= 0.394165

Sum of electronic and zero-point Energies= -1187.453265

Sum of electronic and thermal Energies= -1187.426009

Sum of electronic and thermal Enthalpies= -1187.425065

Sum of electronic and thermal Free Energies= -1187.513711

E(RM062X/6-311+G(2d,p)) = -1188.28396192

## TS1

|   |            |            |             |
|---|------------|------------|-------------|
| C | 0.48943500 | 2.14347700 | -1.18350600 |
| C | 1.54583800 | 1.15793200 | -1.52501700 |
| H | 2.55324100 | 1.56989400 | -1.43400200 |
| H | 1.41519600 | 0.77512600 | -2.54155600 |

|   |             |             |             |
|---|-------------|-------------|-------------|
| C | 0.63240300  | 2.99593100  | -0.01975200 |
| O | -0.20515800 | 3.77505900  | 0.41511300  |
| O | 1.84501200  | 2.85875600  | 0.57919200  |
| C | 2.06683700  | 3.67796300  | 1.72882300  |
| H | 1.29756800  | 3.46566400  | 2.47846900  |
| H | 1.97338900  | 4.73218100  | 1.44785100  |
| C | 3.45245700  | 3.36068300  | 2.24717100  |
| H | 3.52922200  | 2.30432900  | 2.52090200  |
| H | 3.66795900  | 3.96548800  | 3.13277500  |
| H | 4.20835300  | 3.57770100  | 1.48677000  |
| O | 1.46831500  | 0.01657200  | -0.61348800 |
| C | 2.40453400  | -0.91149500 | -0.78585900 |
| O | 3.27451300  | -0.87592800 | -1.62860700 |
| O | 2.20533200  | -1.86683200 | 0.12173500  |
| C | 3.08806800  | -3.02987800 | 0.17035700  |
| C | 4.51377000  | -2.59336900 | 0.48866900  |
| H | 5.12783500  | -3.47997700 | 0.67552300  |
| H | 4.52431600  | -1.97249800 | 1.39049300  |
| H | 4.95290700  | -2.03120200 | -0.33677200 |
| C | 2.50799600  | -3.84069300 | 1.32228600  |
| H | 1.47005900  | -4.11619900 | 1.11177900  |
| H | 2.53528000  | -3.26112100 | 2.25008500  |
| H | 3.09105800  | -4.75517300 | 1.46356500  |
| C | 2.99634800  | -3.81365800 | -1.13425400 |
| H | 1.95034300  | -4.04413100 | -1.36166400 |
| H | 3.53927300  | -4.75778600 | -1.02516700 |
| H | 3.42830400  | -3.25591200 | -1.96651700 |
| C | -0.70943700 | 2.19459100  | -1.87065100 |
| H | -0.77682200 | 1.72431800  | -2.84856600 |
| H | -1.34131300 | 3.06646600  | -1.73021500 |

|   |             |             |             |
|---|-------------|-------------|-------------|
| N | -2.07038700 | 1.00620900  | -1.09443100 |
| C | -1.76585200 | 0.38121900  | 0.04113100  |
| H | -0.74870200 | 0.53637500  | 0.40077100  |
| C | -3.29535100 | 0.85412600  | -1.60639800 |
| H | -3.49986400 | 1.38892600  | -2.53191200 |
| C | -2.65905700 | -0.42454100 | 0.71762500  |
| H | -2.34501700 | -0.90645200 | 1.63454600  |
| C | -3.96521700 | -0.60576800 | 0.19719100  |
| C | -4.26376500 | 0.07083900  | -1.01403300 |
| H | -5.23643100 | -0.01011500 | -1.48203700 |
| N | -4.88142200 | -1.38305100 | 0.82246600  |
| C | -6.20739700 | -1.54573800 | 0.24987500  |
| H | -6.78405700 | -2.22216500 | 0.87953000  |
| H | -6.15357900 | -1.97478800 | -0.75727800 |
| H | -6.73840300 | -0.58803300 | 0.19182600  |
| C | -4.54578900 | -2.02937600 | 2.08045700  |
| H | -5.41538000 | -2.57908300 | 2.43875800  |
| H | -4.26477600 | -1.29292700 | 2.84223400  |
| H | -3.71633000 | -2.73548700 | 1.95730400  |

Zero-point correction= 0.454079 (Hartree/Particle)

Thermal correction to Energy= 0.481696

Thermal correction to Enthalpy= 0.482640

Thermal correction to Gibbs Free Energy= 0.391330

Sum of electronic and zero-point Energies= -1187.453739

Sum of electronic and thermal Energies= -1187.426122

Sum of electronic and thermal Enthalpies= -1187.425178

Sum of electronic and thermal Free Energies= -1187.516488

E(RM062X/6-311+G(2d,p)) = -1188.28582197

**TS2-CONF2**

|   |             |             |             |
|---|-------------|-------------|-------------|
| C | 1.98578200  | -1.07211900 | -1.18397000 |
| C | 1.24728300  | -2.23939600 | -1.08016500 |
| H | 1.69250300  | -3.07870200 | -0.55858000 |
| H | 0.56650500  | -2.49279300 | -1.88671500 |
| C | 3.10385500  | -0.77986600 | -0.32277800 |
| O | 3.75615900  | 0.26186400  | -0.35392200 |
| O | 3.41481200  | -1.77339600 | 0.54649800  |
| C | 4.53424400  | -1.52654800 | 1.39990400  |
| H | 4.35050000  | -0.62020100 | 1.98588400  |
| H | 5.42660200  | -1.35207900 | 0.78967800  |
| C | 4.69733000  | -2.73975100 | 2.28912600  |
| H | 3.79750100  | -2.90123700 | 2.88962500  |
| H | 5.54501600  | -2.59571100 | 2.96535300  |
| H | 4.88025400  | -3.63635600 | 1.68973100  |
| O | -0.13925400 | -2.18880200 | 0.20490800  |
| C | -1.31135600 | -2.03956700 | -0.27379400 |
| O | -1.62477600 | -1.80814900 | -1.44814200 |
| O | -2.25272800 | -2.16071600 | 0.70935900  |
| C | -3.65897000 | -1.98070700 | 0.42452300  |
| C | -4.15599000 | -3.02908300 | -0.56815400 |
| H | -5.24728900 | -2.97572800 | -0.64419600 |
| H | -3.88674800 | -4.03096400 | -0.21642800 |
| H | -3.72161800 | -2.87243600 | -1.55590800 |
| C | -4.31443400 | -2.20099500 | 1.78503400  |
| H | -3.93692500 | -1.47560900 | 2.51271700  |
| H | -4.09519000 | -3.20764400 | 2.15468600  |
| H | -5.39990600 | -2.08601500 | 1.70711400  |
| C | -3.93157100 | -0.55767300 | -0.05913400 |
| H | -3.51595300 | 0.16116000  | 0.65645800  |
| H | -5.01170500 | -0.38857100 | -0.12440600 |

|   |             |             |             |
|---|-------------|-------------|-------------|
| H | -3.48815600 | -0.38597700 | -1.04171600 |
| C | 1.59621300  | 0.02587900  | -2.11413200 |
| H | 0.88370700  | -0.32797800 | -2.86263300 |
| H | 2.45680000  | 0.46574300  | -2.62430800 |
| N | 0.92799200  | 1.17361200  | -1.41845600 |
| C | 1.63387900  | 2.26271800  | -1.04721300 |
| H | 2.68143600  | 2.25979700  | -1.32011200 |
| C | -0.38144400 | 1.08079000  | -1.09599900 |
| H | -0.88516200 | 0.17216300  | -1.41975700 |
| C | 1.06007100  | 3.29122000  | -0.34748200 |
| H | 1.67889600  | 4.13706200  | -0.08049200 |
| C | -0.31312700 | 3.22897200  | 0.01497600  |
| C | -1.02514900 | 2.07008500  | -0.40436900 |
| H | -2.07768800 | 1.94254300  | -0.18957100 |
| N | -0.90774000 | 4.20948900  | 0.71289900  |
| C | -2.31767900 | 4.10271500  | 1.06550800  |
| H | -2.60141300 | 4.97898800  | 1.64566400  |
| H | -2.50335100 | 3.20836500  | 1.66996200  |
| H | -2.94537000 | 4.06064100  | 0.16891100  |
| C | -0.14308900 | 5.37929300  | 1.12587300  |
| H | -0.79481100 | 6.04322500  | 1.69144500  |
| H | 0.24176400  | 5.92362800  | 0.25676500  |
| H | 0.69923700  | 5.09078200  | 1.76358800  |

Zero-point correction= 0.455209 (Hartree/Particle)

Thermal correction to Energy= 0.482377

Thermal correction to Enthalpy= 0.483321

Thermal correction to Gibbs Free Energy= 0.394511

Sum of electronic and zero-point Energies= -1187.455964

Sum of electronic and thermal Energies= -1187.428797

Sum of electronic and thermal Enthalpies= -1187.427853

Sum of electronic and thermal Free Energies= -1187.516663

E(RM062X/6-311+G(2d,p)) = -1188.29100831

**TS2-CONF3**

|   |             |             |             |
|---|-------------|-------------|-------------|
| C | -1.99639200 | -1.49083000 | -1.20591000 |
| C | -2.47613400 | -0.46495200 | -2.00783000 |
| H | -3.35084700 | 0.07594600  | -1.66516100 |
| H | -2.38237200 | -0.55979200 | -3.08655000 |
| C | -2.35023100 | -1.61466400 | 0.18648900  |
| O | -1.74766500 | -2.31926000 | 0.99440100  |
| O | -3.45689800 | -0.92399400 | 0.54524300  |
| C | -3.68239100 | -0.80073600 | 1.94702700  |
| H | -2.77084700 | -0.42932100 | 2.42720600  |
| H | -3.90779800 | -1.78444600 | 2.37345000  |
| C | -4.83397600 | 0.16304800  | 2.13173300  |
| H | -4.58392700 | 1.13543800  | 1.69830600  |
| H | -5.04701400 | 0.29731400  | 3.19636600  |
| H | -5.73710000 | -0.21430700 | 1.64264900  |
| O | -1.35168300 | 1.02472000  | -2.08855000 |
| C | -1.11640500 | 1.54567800  | -0.93708700 |
| O | -1.80269700 | 1.46882600  | 0.07465400  |
| O | 0.07608700  | 2.22520600  | -0.96563000 |
| C | 0.50675500  | 3.00286200  | 0.17483900  |
| C | 0.77503800  | 2.10838900  | 1.38346200  |
| H | 1.20094100  | 2.70713200  | 2.19606600  |
| H | 1.49468100  | 1.32456900  | 1.12143900  |
| H | -0.14472600 | 1.63691500  | 1.73152600  |
| C | 1.81096600  | 3.62995000  | -0.30941000 |
| H | 1.63050000  | 4.26394500  | -1.18339000 |
| H | 2.52664000  | 2.84977900  | -0.59168100 |

|   |             |             |             |
|---|-------------|-------------|-------------|
| H | 2.25670000  | 4.24182900  | 0.48105300  |
| C | -0.50828300 | 4.09824900  | 0.49599200  |
| H | -0.72669200 | 4.68006000  | -0.40616400 |
| H | -0.09360400 | 4.77678900  | 1.24896800  |
| H | -1.43773500 | 3.67226100  | 0.87595000  |
| C | -0.88527500 | -2.37554000 | -1.65225600 |
| H | -0.75834600 | -2.33569000 | -2.73730700 |
| H | -1.02676800 | -3.41714700 | -1.35344900 |
| N | 0.44226100  | -1.98990000 | -1.06192700 |
| C | 1.02217900  | -2.75149100 | -0.11261800 |
| H | 0.48798100  | -3.65141400 | 0.16503800  |
| C | 1.02403500  | -0.82833000 | -1.43370000 |
| H | 0.47589300  | -0.23177000 | -2.15667000 |
| C | 2.20794800  | -2.39917400 | 0.47612400  |
| H | 2.61823600  | -3.05226200 | 1.23429200  |
| C | 2.85853100  | -1.19282800 | 0.09997600  |
| C | 2.20835800  | -0.40850000 | -0.89333400 |
| H | 2.61190300  | 0.53879500  | -1.22595100 |
| N | 4.01625400  | -0.80555000 | 0.66064700  |
| C | 4.62959900  | 0.45715700  | 0.27000700  |
| H | 5.57426300  | 0.56876900  | 0.79961000  |
| H | 3.98377200  | 1.30564200  | 0.52541400  |
| H | 4.83124900  | 0.47752500  | -0.80598700 |
| C | 4.62928700  | -1.61816700 | 1.70329200  |
| H | 5.56022900  | -1.14737500 | 2.01497300  |
| H | 4.85502700  | -2.62342300 | 1.33212100  |
| H | 3.97135700  | -1.70232400 | 2.57511300  |

Zero-point correction= 0.455433 (Hartree/Particle)

Thermal correction to Energy= 0.482116

Thermal correction to Enthalpy= 0.483061



Thermal correction to Gibbs Free Energy= 0.398578  
 Sum of electronic and zero-point Energies= -1187.455311  
 Sum of electronic and thermal Energies= -1187.428627  
 Sum of electronic and thermal Enthalpies= -1187.427683  
 Sum of electronic and thermal Free Energies= -1187.512166  
 E(RM062X/6-311+G(2d,p)) = -1188.28921322

**TS2**

|   |             |             |             |
|---|-------------|-------------|-------------|
| C | -0.21780000 | 1.93532400  | -1.24236200 |
| C | 1.14497300  | 1.70868200  | -1.27898200 |
| H | 1.80383400  | 2.38399400  | -0.74561100 |
| H | 1.58240500  | 1.26304500  | -2.16725300 |
| C | -0.85640500 | 2.77487200  | -0.25648900 |
| O | -2.06953800 | 2.93945900  | -0.17125900 |
| O | 0.00251000  | 3.40258800  | 0.58427500  |
| C | -0.59718900 | 4.26355200  | 1.55498000  |
| H | -1.29764700 | 3.68694400  | 2.16783700  |
| H | -1.16913200 | 5.04505600  | 1.04384700  |
| C | 0.52117700  | 4.84879700  | 2.38907300  |
| H | 1.08241100  | 4.05631900  | 2.89246500  |
| H | 0.10869200  | 5.51880300  | 3.14903500  |
| H | 1.21259400  | 5.41931200  | 1.76213500  |
| O | 1.62932700  | 0.19980200  | -0.21430700 |
| C | 2.85225100  | -0.15092300 | -0.37430100 |
| O | 3.71060200  | 0.42994500  | -1.03451500 |
| O | 3.11014000  | -1.31065900 | 0.30625900  |
| C | 4.43087000  | -1.89894200 | 0.29231800  |
| C | 5.45537800  | -0.95193000 | 0.91334100  |
| H | 6.41168400  | -1.47162400 | 1.03567800  |
| H | 5.11264600  | -0.62874800 | 1.90237600  |

|   |             |             |             |
|---|-------------|-------------|-------------|
| H | 5.60629300  | -0.07245400 | 0.28649400  |
| C | 4.26552900  | -3.13504100 | 1.17203200  |
| H | 3.50609900  | -3.80300300 | 0.75294800  |
| H | 3.95406000  | -2.84623000 | 2.18096100  |
| H | 5.21097800  | -3.68177800 | 1.24160500  |
| C | 4.82328900  | -2.31531200 | -1.12356000 |
| H | 4.04488600  | -2.95539900 | -1.55339000 |
| H | 5.75782200  | -2.88577200 | -1.09579700 |
| H | 4.95814100  | -1.44273300 | -1.76370700 |
| C | -1.16058200 | 1.19093500  | -2.12219800 |
| H | -0.62376700 | 0.64870600  | -2.90520200 |
| H | -1.90505200 | 1.83998800  | -2.58903900 |
| N | -1.96464600 | 0.17406300  | -1.36554100 |
| C | -3.31201200 | 0.20583800  | -1.38298400 |
| H | -3.76237000 | 0.99589100  | -1.97234500 |
| C | -1.32626300 | -0.76205600 | -0.62761700 |
| H | -0.24005800 | -0.69342200 | -0.60768000 |
| C | -4.07020300 | -0.70266600 | -0.69365700 |
| H | -5.14713900 | -0.61815300 | -0.74749400 |
| C | -3.43736900 | -1.71783800 | 0.07518200  |
| C | -2.01423800 | -1.70802300 | 0.08245000  |
| H | -1.44690700 | -2.42909200 | 0.65557500  |
| N | -4.14214400 | -2.62917100 | 0.76398200  |
| C | -3.45279200 | -3.65643100 | 1.53502700  |
| H | -4.19501400 | -4.31019000 | 1.98981300  |
| H | -2.84424200 | -3.21091300 | 2.32923300  |
| H | -2.80646600 | -4.26088700 | 0.89022300  |
| C | -5.59862700 | -2.58237100 | 0.75870000  |
| H | -5.97839800 | -3.37888300 | 1.39645100  |
| H | -5.99257700 | -2.72694000 | -0.25312600 |

|                                              |             |             |                             |
|----------------------------------------------|-------------|-------------|-----------------------------|
| H                                            | -5.96049600 | -1.62396600 | 1.14555700                  |
| Zero-point correction=                       |             |             | 0.454905 (Hartree/Particle) |
| Thermal correction to Energy=                |             |             | 0.482211                    |
| Thermal correction to Enthalpy=              |             |             | 0.483155                    |
| Thermal correction to Gibbs Free Energy=     |             |             | 0.392729                    |
| Sum of electronic and zero-point Energies=   |             |             | -1187.453901                |
| Sum of electronic and thermal Energies=      |             |             | -1187.426595                |
| Sum of electronic and thermal Enthalpies=    |             |             | -1187.425651                |
| Sum of electronic and thermal Free Energies= |             |             | -1187.516077                |
| E(RM062X/6-311+G(2d,p)) =                    |             |             | -1188.28980386              |

Barrier of Rotation around N–N bond of **3c** in Cyclohexane

cyclohexane-**3c1**-CONF2

|   |             |             |             |
|---|-------------|-------------|-------------|
| C | 2.14032400  | 0.78500200  | 1.09446200  |
| C | 1.68006000  | 1.46406200  | 2.16785600  |
| H | 2.21646700  | 2.24152400  | 2.69313900  |
| C | 0.26087800  | 1.17884500  | 2.33688500  |
| O | -0.53737200 | 1.66115500  | 3.10529100  |
| C | -0.09922500 | 0.05199600  | 1.32254400  |
| N | 1.15558500  | -0.04188800 | 0.53724500  |
| C | 1.32899200  | -1.09335600 | -0.34776000 |
| O | 0.39119200  | -1.61156200 | -0.92575100 |
| O | 2.60204200  | -1.45449000 | -0.43827200 |
| C | 3.06115300  | -2.40023300 | -1.45578500 |
| C | 2.71961800  | -1.87526400 | -2.84498700 |
| H | 3.13925200  | -0.87324800 | -2.98198900 |
| H | 1.64067500  | -1.84083100 | -3.00640700 |
| H | 3.16223400  | -2.53599300 | -3.59681800 |
| C | 4.56820800  | -2.40484600 | -1.23485600 |
| H | 4.97546600  | -1.39759000 | -1.36975900 |

|   |             |             |             |
|---|-------------|-------------|-------------|
| H | 5.04783200  | -3.08010400 | -1.94940000 |
| H | 4.80500500  | -2.74167100 | -0.22122000 |
| C | 2.46173800  | -3.77518100 | -1.18683900 |
| H | 1.38486000  | -3.78016000 | -1.36094500 |
| H | 2.65769700  | -4.07529100 | -0.15240200 |
| H | 2.93041600  | -4.50908000 | -1.85005600 |
| C | 3.45102100  | 0.99389700  | 0.44765300  |
| C | 5.90852200  | 1.51517600  | -0.76337100 |
| C | 3.50852800  | 1.31469400  | -0.91345700 |
| C | 4.62424100  | 0.94510700  | 1.19935200  |
| C | 5.85182500  | 1.19856600  | 0.59070700  |
| C | 4.73272400  | 1.57968400  | -1.51358600 |
| H | 2.58678800  | 1.37320700  | -1.48710700 |
| H | 4.57255100  | 0.69334300  | 2.25455600  |
| H | 6.76361800  | 1.14946100  | 1.17764900  |
| H | 4.77204300  | 1.84048600  | -2.56693100 |
| H | 6.86521500  | 1.71740700  | -1.23501900 |
| C | -0.37764300 | -1.26320300 | 2.09595600  |
| H | -0.61638100 | -2.01063700 | 1.33359100  |
| C | -1.57548100 | -1.12642600 | 3.04088200  |
| H | -1.29739900 | -0.58114600 | 3.94639000  |
| H | -1.91156400 | -2.12599000 | 3.33485100  |
| H | -2.41393600 | -0.59496100 | 2.58521700  |
| C | 0.85276200  | -1.74608700 | 2.86929300  |
| H | 1.14113500  | -1.03923100 | 3.65440400  |
| H | 1.72081100  | -1.91649600 | 2.22379600  |
| H | 0.61155700  | -2.69611700 | 3.35581100  |
| N | -1.22971900 | 0.41006600  | 0.48336200  |
| C | -1.16557300 | 1.61156400  | -0.20555900 |
| O | -0.33858100 | 2.46374400  | 0.03529500  |

|   |             |             |             |
|---|-------------|-------------|-------------|
| O | -2.11511900 | 1.69072800  | -1.13941900 |
| C | -2.27643500 | 2.98064500  | -1.77700800 |
| H | -1.27774100 | 3.36701600  | -1.99960100 |
| C | -3.00532700 | 3.91517900  | -0.82780600 |
| H | -3.97609600 | 3.48897200  | -0.55637800 |
| H | -3.16740400 | 4.88496800  | -1.30805600 |
| H | -2.42280300 | 4.07285500  | 0.08298200  |
| C | -3.04661500 | 2.70644700  | -3.05329000 |
| H | -2.50453400 | 2.00470700  | -3.69289300 |
| H | -3.19543500 | 3.63863300  | -3.60552300 |
| H | -4.02763000 | 2.28034400  | -2.82004700 |
| N | -2.06403800 | -0.58200200 | 0.02356700  |
| C | -3.42238800 | -0.41337300 | 0.18375100  |
| O | -3.94929300 | 0.37567800  | 0.93132300  |
| O | -4.05768000 | -1.29452600 | -0.60483700 |
| C | -5.49797900 | -1.32490600 | -0.48637200 |
| H | -5.84388200 | -0.29068100 | -0.40217000 |
| C | -6.00295500 | -1.95687200 | -1.76851300 |
| H | -7.09611400 | -1.99251600 | -1.76123900 |
| H | -5.62332000 | -2.97884300 | -1.86600100 |
| H | -5.67881000 | -1.38039300 | -2.63913100 |
| C | -5.88742700 | -2.10567700 | 0.75696800  |
| H | -6.97700500 | -2.14559000 | 0.84987500  |
| H | -5.48274700 | -1.62831200 | 1.65274200  |
| H | -5.50637400 | -3.13015400 | 0.69372800  |
| H | -1.73003400 | -1.08959400 | -0.79062000 |

Zero-point correction= 0.620867 (Hartree/Particle)

Thermal correction to Energy= 0.658670

Thermal correction to Enthalpy= 0.659614

Thermal correction to Gibbs Free Energy= 0.549707

Sum of electronic and zero-point Energies= -1702.631169  
 Sum of electronic and thermal Energies= -1702.593366  
 Sum of electronic and thermal Enthalpies= -1702.592422  
 Sum of electronic and thermal Free Energies= -1702.702329  
 E(RM062X/6-311+G(2d,p)) = -1703.78235030

**cyclohexane-3c1**

|   |             |             |             |
|---|-------------|-------------|-------------|
| C | 1.80751000  | 0.09884200  | 1.47539500  |
| C | 1.08354000  | 0.06565900  | 2.61652900  |
| H | 1.39699300  | 0.47395500  | 3.56685000  |
| C | -0.27660600 | -0.34917600 | 2.30031900  |
| O | -1.25727800 | -0.39339400 | 3.00639300  |
| C | -0.28220300 | -0.78174700 | 0.80436100  |
| N | 1.07262400  | -0.36194400 | 0.37635700  |
| C | 1.54502400  | -0.75062800 | -0.86691100 |
| O | 0.79762100  | -0.94225300 | -1.80809900 |
| O | 2.86178800  | -0.90787900 | -0.86402700 |
| C | 3.61190300  | -1.11690300 | -2.10290700 |
| C | 3.37240100  | 0.04685300  | -3.05689500 |
| H | 3.62198700  | 0.99302900  | -2.56546800 |
| H | 2.33609400  | 0.07874900  | -3.39803500 |
| H | 4.02213300  | -0.06557900 | -3.93030000 |
| C | 5.05288700  | -1.12426700 | -1.60949500 |
| H | 5.29066700  | -0.17658300 | -1.11556500 |
| H | 5.73504400  | -1.26574000 | -2.45285800 |
| H | 5.20809400  | -1.93677200 | -0.89346400 |
| C | 3.23216900  | -2.46080100 | -2.71256100 |
| H | 2.20677300  | -2.45343600 | -3.08462300 |
| H | 3.33562200  | -3.25527300 | -1.96642200 |
| H | 3.90806900  | -2.68337300 | -3.54429700 |

|   |             |             |             |
|---|-------------|-------------|-------------|
| C | 3.14424000  | 0.70819600  | 1.32824500  |
| C | 5.62586200  | 1.96229600  | 1.11977100  |
| C | 3.33853900  | 1.72666600  | 0.38811500  |
| C | 4.19065000  | 0.32829000  | 2.16726500  |
| C | 5.43232600  | 0.95100300  | 2.05607900  |
| C | 4.57360400  | 2.35430300  | 0.28987800  |
| H | 2.50962200  | 2.03243400  | -0.24555100 |
| H | 4.03327200  | -0.46400200 | 2.89319800  |
| H | 6.24755200  | 0.64489500  | 2.70414000  |
| H | 4.71709300  | 3.15283200  | -0.43182800 |
| H | 6.59219200  | 2.45025600  | 1.03806600  |
| C | -0.44420500 | -2.32229400 | 0.71413300  |
| H | -0.45438600 | -2.55741600 | -0.35393500 |
| C | -1.76184000 | -2.79829700 | 1.33201400  |
| H | -1.70393800 | -2.80009800 | 2.42357100  |
| H | -1.96199800 | -3.82130700 | 0.99800700  |
| H | -2.60602900 | -2.16679100 | 1.04938300  |
| C | 0.73303600  | -3.06206000 | 1.35642700  |
| H | 0.79614000  | -2.86683900 | 2.43211400  |
| H | 1.69609500  | -2.80519800 | 0.90330100  |
| H | 0.58396900  | -4.13827200 | 1.22625200  |
| N | -1.31601100 | -0.09850000 | 0.04338700  |
| C | -1.31472700 | 1.28719100  | 0.06527200  |
| O | -0.67374200 | 1.93274700  | 0.86592200  |
| O | -2.09857000 | 1.79123600  | -0.89099200 |
| C | -2.26213600 | 3.22968800  | -0.89140200 |
| H | -1.29551800 | 3.67189500  | -0.63548200 |
| C | -3.30368700 | 3.60955700  | 0.14557500  |
| H | -4.26736800 | 3.15777700  | -0.11077900 |
| H | -3.42646400 | 4.69648500  | 0.17359500  |

|   |             |             |             |
|---|-------------|-------------|-------------|
| H | -3.00156600 | 3.26985700  | 1.13965300  |
| C | -2.66772200 | 3.59442500  | -2.30553200 |
| H | -1.90049500 | 3.28950700  | -3.02205200 |
| H | -2.80915500 | 4.67614300  | -2.38442100 |
| H | -3.60730100 | 3.09993100  | -2.57113600 |
| N | -1.92187100 | -0.75103700 | -1.00864400 |
| C | -3.29719000 | -0.74878500 | -1.13425000 |
| O | -3.84665200 | -1.03549300 | -2.17443700 |
| O | -3.90476500 | -0.44065600 | 0.01466500  |
| C | -5.34665800 | -0.54458400 | 0.02213900  |
| H | -5.71539400 | -0.09099700 | -0.90284900 |
| C | -5.75367300 | -2.00715700 | 0.08577500  |
| H | -6.84485000 | -2.09064900 | 0.09332300  |
| H | -5.36616200 | -2.46630700 | 1.00129500  |
| H | -5.37255600 | -2.55352800 | -0.77991600 |
| C | -5.80219600 | 0.24273000  | 1.23493700  |
| H | -6.89376800 | 0.22465900  | 1.30317000  |
| H | -5.47251800 | 1.28295800  | 1.17335300  |
| H | -5.38680100 | -0.19601000 | 2.14740700  |
| H | -1.40665000 | -0.72928600 | -1.88445700 |

Zero-point correction= 0.620793 (Hartree/Particle)

Thermal correction to Energy= 0.658597

Thermal correction to Enthalpy= 0.659541

Thermal correction to Gibbs Free Energy= 0.549462

Sum of electronic and zero-point Energies= -1702.631270

Sum of electronic and thermal Energies= -1702.593465

Sum of electronic and thermal Enthalpies= -1702.592521

Sum of electronic and thermal Free Energies= -1702.702601

E(RM062X/6-311+G(2d,p)) = -1703.78236592



cyclohexane-3c2

|   |             |             |             |
|---|-------------|-------------|-------------|
| C | -1.76551600 | -1.47809700 | 0.21877200  |
| C | -1.46886000 | -2.66558300 | 0.78976600  |
| H | -1.93210100 | -3.61196600 | 0.54893100  |
| C | -0.22068900 | -2.53203300 | 1.52355100  |
| O | 0.44372900  | -3.37884700 | 2.07767600  |
| C | 0.18750900  | -1.02605700 | 1.47288100  |
| N | -0.88271400 | -0.45808300 | 0.61676300  |
| C | -1.22222900 | 0.89174400  | 0.70518600  |
| O | -0.44291400 | 1.75458700  | 1.04315500  |
| O | -2.50969800 | 1.07578700  | 0.41502200  |
| C | -3.04399100 | 2.40935400  | 0.15875300  |
| C | -2.26628100 | 3.07023900  | -0.97367400 |
| H | -2.29103200 | 2.43593700  | -1.86576100 |
| H | -1.22678200 | 3.25005400  | -0.69333300 |
| H | -2.73400800 | 4.02848400  | -1.22080300 |
| C | -4.47374700 | 2.10852600  | -0.27386800 |
| H | -4.47512300 | 1.46809300  | -1.16203000 |
| H | -4.99760100 | 3.04015100  | -0.50773700 |
| H | -5.01491600 | 1.59333700  | 0.52557500  |
| C | -3.02181000 | 3.23267200  | 1.44145800  |
| H | -2.00055000 | 3.46836500  | 1.74318500  |
| H | -3.51408000 | 2.68206400  | 2.24971100  |
| H | -3.56953700 | 4.16705300  | 1.28187300  |
| C | -2.74879100 | -1.27274700 | -0.86086500 |
| C | -4.53538000 | -0.98758600 | -2.98220500 |
| C | -2.35944100 | -0.58590900 | -2.01711800 |
| C | -4.02834800 | -1.81972400 | -0.77387500 |
| C | -4.92206800 | -1.66984100 | -1.83195700 |
| C | -3.24957200 | -0.45127200 | -3.07490500 |

|   |             |             |             |
|---|-------------|-------------|-------------|
| H | -1.35375200 | -0.17657700 | -2.07871300 |
| H | -4.32555100 | -2.34524300 | 0.12908400  |
| H | -5.92128200 | -2.08725000 | -1.75583200 |
| H | -2.94109000 | 0.07196300  | -3.97502000 |
| H | -5.23164200 | -0.87555500 | -3.80769700 |
| C | 0.16967600  | -0.44279000 | 2.90969300  |
| H | 0.40459500  | 0.61826200  | 2.80660100  |
| C | 1.22760500  | -1.08415800 | 3.81049800  |
| H | 0.98789300  | -2.12560500 | 4.03451700  |
| H | 1.27196600  | -0.52851000 | 4.75268800  |
| H | 2.22405300  | -1.06639300 | 3.36027500  |
| C | -1.21531400 | -0.57751100 | 3.54947700  |
| H | -1.47874300 | -1.62760500 | 3.71806300  |
| H | -2.00914000 | -0.11950300 | 2.94989900  |
| H | -1.21145500 | -0.07883200 | 4.52328300  |
| N | 1.51622100  | -0.89003900 | 0.88928600  |
| C | 1.83290200  | -1.62126500 | -0.25487200 |
| O | 1.07762500  | -2.40603300 | -0.77943100 |
| O | 3.08348200  | -1.36673400 | -0.64744100 |
| C | 3.51856300  | -2.04407600 | -1.85035200 |
| H | 2.67845900  | -2.04021700 | -2.55057800 |
| C | 3.91418100  | -3.47083000 | -1.51240300 |
| H | 4.72765400  | -3.47258300 | -0.77963300 |
| H | 4.25909300  | -3.98597000 | -2.41417600 |
| H | 3.06389400  | -4.02052700 | -1.10293500 |
| C | 4.67077200  | -1.21937600 | -2.38837900 |
| H | 4.35052000  | -0.19429400 | -2.59233700 |
| H | 5.04294500  | -1.66053300 | -3.31746400 |
| H | 5.49167300  | -1.19218200 | -1.66468400 |
| N | 2.17217600  | 0.30600000  | 1.08264000  |

|   |            |            |             |
|---|------------|------------|-------------|
| C | 2.14852600 | 1.22040300 | 0.04262700  |
| O | 1.48038400 | 1.10848500 | -0.95836300 |
| O | 2.96995200 | 2.23345500 | 0.33668300  |
| C | 2.99469500 | 3.33079400 | -0.60525000 |
| H | 1.96133600 | 3.52219400 | -0.90957300 |
| C | 3.55529400 | 4.51259200 | 0.16114400  |
| H | 3.57355200 | 5.39812800 | -0.48053900 |
| H | 4.57760100 | 4.30288500 | 0.49149300  |
| H | 2.94215600 | 4.73012200 | 1.03946900  |
| C | 3.83305700 | 2.95512900 | -1.81486900 |
| H | 3.90584500 | 3.80653000 | -2.49859800 |
| H | 3.37830300 | 2.11946400 | -2.35085500 |
| H | 4.84420700 | 2.67585400 | -1.50043800 |
| H | 3.01789800 | 0.26407300 | 1.63960100  |

Zero-point correction= 0.620575 (Hartree/Particle)

Thermal correction to Energy= 0.658315

Thermal correction to Enthalpy= 0.659260

Thermal correction to Gibbs Free Energy= 0.550308

Sum of electronic and zero-point Energies= -1702.628527

Sum of electronic and thermal Energies= -1702.590787

Sum of electronic and thermal Enthalpies= -1702.589842

Sum of electronic and thermal Free Energies= -1702.698794

E(RM062X/6-311+G(2d,p)) = -1703.77937750

#### cyclohexane-3c-TS

|   |             |             |            |
|---|-------------|-------------|------------|
| C | -1.40680500 | -1.60763000 | 0.02723900 |
| C | -0.83624200 | -2.75744900 | 0.44734700 |
| H | -1.06796500 | -3.74706500 | 0.07946500 |
| C | 0.33491500  | -2.43905900 | 1.24280800 |
| O | 1.19561800  | -3.17922500 | 1.66572100 |

|   |             |             |             |
|---|-------------|-------------|-------------|
| C | 0.39370400  | -0.88696000 | 1.40364700  |
| N | -0.79141900 | -0.47065100 | 0.58161600  |
| C | -1.46043300 | 0.72262500  | 0.82350100  |
| O | -0.89405800 | 1.73300000  | 1.20656400  |
| O | -2.76199800 | 0.60900900  | 0.61344000  |
| C | -3.63608100 | 1.78317800  | 0.54186700  |
| C | -3.11782000 | 2.76124000  | -0.50581700 |
| H | -2.99416500 | 2.25160100  | -1.46704300 |
| H | -2.16758700 | 3.20777700  | -0.20813200 |
| H | -3.85225300 | 3.56197000  | -0.63674400 |
| C | -4.95769000 | 1.17024700  | 0.09766900  |
| H | -4.84160300 | 0.68043300  | -0.87489200 |
| H | -5.71964000 | 1.95042700  | 0.01234900  |
| H | -5.29820900 | 0.42589100  | 0.82364000  |
| C | -3.75225900 | 2.41197600  | 1.92434900  |
| H | -2.80559000 | 2.85363600  | 2.23955400  |
| H | -4.05712200 | 1.65808700  | 2.65718100  |
| H | -4.51602700 | 3.19565900  | 1.90192400  |
| C | -2.42911200 | -1.49562900 | -1.02829300 |
| C | -4.29161800 | -1.33975700 | -3.09552300 |
| C | -2.23574600 | -0.58969200 | -2.07719700 |
| C | -3.54934400 | -2.32677100 | -1.02189400 |
| C | -4.48190000 | -2.24284900 | -2.05275500 |
| C | -3.16339600 | -0.51779700 | -3.10905800 |
| H | -1.34421800 | 0.03231900  | -2.08502000 |
| H | -3.69595000 | -3.02189200 | -0.20026400 |
| H | -5.35795800 | -2.88367400 | -2.03985800 |
| H | -3.00490000 | 0.17659400  | -3.92851900 |
| H | -5.01751600 | -1.27832300 | -3.90045100 |
| C | 0.21780200  | -0.50007900 | 2.89908700  |

|   |             |             |             |
|---|-------------|-------------|-------------|
| H | 0.09132900  | 0.58533100  | 2.94805400  |
| C | 1.45522000  | -0.86628700 | 3.71749000  |
| H | 1.65906100  | -1.93872500 | 3.67125400  |
| H | 1.28502300  | -0.58818900 | 4.76265600  |
| H | 2.33864100  | -0.33591900 | 3.35571300  |
| C | -1.04268200 | -1.14193200 | 3.48733200  |
| H | -0.93572400 | -2.22973700 | 3.56306300  |
| H | -1.94284600 | -0.92589800 | 2.90079600  |
| H | -1.20758700 | -0.75617500 | 4.49740300  |
| N | 1.68115000  | -0.44573100 | 0.90520900  |
| C | 2.09848200  | -1.08307100 | -0.32594500 |
| O | 1.35971700  | -1.30102200 | -1.25442400 |
| O | 3.35118800  | -1.47309300 | -0.21188700 |
| C | 3.96308800  | -1.99788500 | -1.41329800 |
| H | 3.56013100  | -1.42918400 | -2.25664500 |
| C | 3.61108800  | -3.46966300 | -1.54435900 |
| H | 3.96601500  | -4.02008800 | -0.66738400 |
| H | 4.08441500  | -3.89070700 | -2.43680400 |
| H | 2.52959600  | -3.60134500 | -1.62918400 |
| C | 5.44834200  | -1.74148300 | -1.25865400 |
| H | 5.63342600  | -0.67263600 | -1.12614400 |
| H | 5.98187100  | -2.08574100 | -2.14951200 |
| H | 5.84050500  | -2.27797200 | -0.38895100 |
| N | 1.80891300  | 0.97830500  | 0.92396800  |
| C | 2.47149600  | 1.64485200  | -0.06943500 |
| O | 3.18951100  | 1.15657400  | -0.91916300 |
| O | 2.23334800  | 2.96165800  | 0.07409200  |
| C | 2.82204100  | 3.82517400  | -0.92253800 |
| H | 3.83432300  | 3.46240800  | -1.12177900 |
| C | 1.99025100  | 3.77130700  | -2.19301000 |

|                                              |            |                             |             |
|----------------------------------------------|------------|-----------------------------|-------------|
| H                                            | 2.41215600 | 4.44104800                  | -2.94863400 |
| H                                            | 0.96321100 | 4.08788200                  | -1.98231900 |
| H                                            | 1.97546000 | 2.75742100                  | -2.60032200 |
| C                                            | 2.86076100 | 5.20605800                  | -0.29784000 |
| H                                            | 3.31617100 | 5.91737600                  | -0.99287300 |
| H                                            | 3.44539600 | 5.19756500                  | 0.62573300  |
| H                                            | 1.84722500 | 5.54773600                  | -0.06535400 |
| H                                            | 0.94940700 | 1.44747700                  | 1.21743000  |
| Zero-point correction=                       |            | 0.619568 (Hartree/Particle) |             |
| Thermal correction to Energy=                |            | 0.656763                    |             |
| Thermal correction to Enthalpy=              |            | 0.657707                    |             |
| Thermal correction to Gibbs Free Energy=     |            | 0.550082                    |             |
| Sum of electronic and zero-point Energies=   |            | -1702.596435                |             |
| Sum of electronic and thermal Energies=      |            | -1702.559240                |             |
| Sum of electronic and thermal Enthalpies=    |            | -1702.558296                |             |
| Sum of electronic and thermal Free Energies= |            | -1702.665922                |             |
| E(RM062X/6-311+G(2d,p)) =                    |            | -1703.74733631              |             |

## Diastereoselectivity of the N-alkylation Reaction

### 3k-RR-TS4

|   |            |             |             |
|---|------------|-------------|-------------|
| C | 1.27748300 | 0.97924300  | -0.74725000 |
| H | 0.63153100 | 1.11383300  | -1.60538100 |
| H | 1.40940400 | -0.05399200 | -0.43685000 |
| C | 2.28042000 | 1.89415300  | -0.50421700 |
| C | 2.35222400 | 3.16987000  | -1.17897600 |
| O | 3.19826000 | 4.03642600  | -0.96712300 |
| O | 1.40542600 | 3.33265900  | -2.13042800 |
| C | 1.33412800 | 4.62328100  | -2.73560200 |
| H | 1.14848700 | 5.37313700  | -1.95956900 |
| H | 2.29422200 | 4.85846800  | -3.20743200 |

|   |             |             |             |
|---|-------------|-------------|-------------|
| C | 0.20794800  | 4.58573300  | -3.74512800 |
| H | -0.73641800 | 4.35707000  | -3.24429500 |
| H | 0.39881500  | 3.82377100  | -4.50723900 |
| H | 0.12052800  | 5.55652400  | -4.24267300 |
| C | 3.18450100  | 1.71928800  | 0.67059700  |
| H | 2.67665300  | 1.19273100  | 1.48095100  |
| H | 3.54954800  | 2.68330700  | 1.02949800  |
| N | 4.39801400  | 0.90290100  | 0.35685100  |
| C | 4.51609300  | -0.36468200 | 0.80047500  |
| H | 3.69705800  | -0.72630600 | 1.41508000  |
| C | 5.59834100  | -1.14226700 | 0.47902300  |
| H | 5.63765300  | -2.15280200 | 0.86301400  |
| C | 5.35248400  | 1.42969900  | -0.44143000 |
| H | 5.16745100  | 2.44680100  | -0.77486100 |
| C | 6.46481200  | 0.71991500  | -0.80058400 |
| H | 7.19674400  | 1.19799700  | -1.43776200 |
| C | 6.63520200  | -0.61732800 | -0.34007400 |
| N | 7.71600800  | -1.34406200 | -0.66544100 |
| C | 7.84411200  | -2.71329900 | -0.18398400 |
| H | 8.78130900  | -3.12897400 | -0.54988800 |
| H | 7.01993300  | -3.33590800 | -0.54873300 |
| H | 7.85248800  | -2.74424400 | 0.91083500  |
| C | 8.75618900  | -0.77155300 | -1.51062700 |
| H | 9.54793100  | -1.50740600 | -1.64079000 |
| H | 9.18607800  | 0.12387800  | -1.04968500 |
| H | 8.36029200  | -0.50695800 | -2.49705100 |
| N | -0.21898200 | 1.08058700  | 0.62247900  |
| N | -0.61409600 | -0.17646500 | 1.08206900  |
| C | 0.30599400  | -0.98902600 | 1.68223700  |
| O | 1.46663900  | -0.68988200 | 1.91410900  |

|   |             |             |             |
|---|-------------|-------------|-------------|
| O | -0.23150400 | -2.18484000 | 1.97458200  |
| C | 0.64417500  | -3.18447400 | 2.53927300  |
| H | 1.31142700  | -2.68365700 | 3.24570600  |
| C | -0.26110000 | -4.16410000 | 3.25906600  |
| H | -0.93207800 | -4.65593600 | 2.54692100  |
| H | -0.86350800 | -3.64975400 | 4.01338600  |
| H | 0.34180900  | -4.93070100 | 3.75452400  |
| C | 1.44011400  | -3.82691400 | 1.41634700  |
| H | 0.75334600  | -4.26745500 | 0.68522100  |
| H | 2.08685600  | -4.61587700 | 1.81257600  |
| H | 2.06501300  | -3.08359200 | 0.91248100  |
| C | 0.01434200  | 1.98652500  | 1.58555100  |
| O | 0.35789000  | 3.15399800  | 1.31379000  |
| O | -0.10766600 | 1.57282900  | 2.86015800  |
| C | -0.02087800 | 2.57260400  | 3.89140300  |
| H | 0.79218500  | 3.25794600  | 3.63519000  |
| C | 0.30553000  | 1.81477200  | 5.16446700  |
| H | -0.49293900 | 1.10145700  | 5.39389100  |
| H | 0.40377000  | 2.51092700  | 6.00290500  |
| H | 1.24376400  | 1.26251400  | 5.05514100  |
| C | -1.33731600 | 3.32691000  | 3.97080500  |
| H | -2.14762500 | 2.62868600  | 4.20822800  |
| H | -1.56021300 | 3.80691000  | 3.01415400  |
| H | -1.29188300 | 4.09076400  | 4.75408000  |
| C | -1.99153900 | -0.59415200 | 0.87819400  |
| C | -2.85385000 | 0.56132800  | 0.38314200  |
| H | -2.48481700 | 0.92146200  | -0.57903200 |
| C | -2.65102000 | -1.14290700 | 2.17961500  |
| O | -2.68391200 | -0.51568800 | 3.21729800  |
| C | -3.26601100 | -2.41331700 | 1.83709000  |



|   |             |             |             |
|---|-------------|-------------|-------------|
| H | -3.92937500 | -2.98140300 | 2.47475800  |
| C | -2.92790100 | -2.73692900 | 0.56361100  |
| N | -2.13033400 | -1.76221900 | -0.03120800 |
| C | -1.28991300 | -1.89702200 | -1.12873200 |
| O | -0.84359800 | -0.93730000 | -1.71851400 |
| O | -1.03697100 | -3.17720900 | -1.39220500 |
| C | -0.35674500 | -3.56997300 | -2.62770200 |
| C | -0.39341600 | -5.09073400 | -2.55386700 |
| H | 0.14729600  | -5.44695800 | -1.67130500 |
| H | 0.07544300  | -5.51644800 | -3.44580500 |
| H | -1.42840600 | -5.44408100 | -2.49718700 |
| C | -1.13636900 | -3.07393000 | -3.83999600 |
| H | -1.15449300 | -1.98347500 | -3.88672200 |
| H | -2.16315000 | -3.45274000 | -3.81163700 |
| H | -0.65756300 | -3.45224200 | -4.74860000 |
| C | 1.07898800  | -3.05819500 | -2.61404300 |
| H | 1.11508500  | -1.97109700 | -2.70270200 |
| H | 1.62409000  | -3.49946400 | -3.45464800 |
| H | 1.57767600  | -3.35857600 | -1.68648800 |
| C | -3.45761000 | -3.89042400 | -0.18952600 |
| C | -4.57210700 | -6.05365800 | -1.55933300 |
| C | -3.56422100 | -5.13594400 | 0.43335300  |
| C | -3.92201200 | -3.72920200 | -1.50065100 |
| C | -4.48157600 | -4.80554700 | -2.17882100 |
| C | -4.11352100 | -6.21606300 | -0.25421100 |
| H | -3.20384800 | -5.25914800 | 1.45079300  |
| H | -3.85681300 | -2.75576800 | -1.98051800 |
| H | -4.84863400 | -4.67159300 | -3.19202100 |
| H | -4.18288300 | -7.18410700 | 0.23215500  |
| H | -5.00375700 | -6.89489300 | -2.09304100 |

|   |             |            |             |
|---|-------------|------------|-------------|
| C | -2.26597500 | 4.01128900 | -0.34250200 |
| O | -2.65660200 | 3.87362900 | 0.80150800  |
| O | -1.02081200 | 3.90265000 | -0.75269800 |
| H | -0.43699500 | 3.60447400 | 0.02103800  |
| O | -3.03627100 | 4.30774800 | -1.39739200 |
| C | -4.46906000 | 4.50602800 | -1.23289000 |
| C | -5.12688900 | 3.22539800 | -0.72791400 |
| H | -4.85413100 | 2.38437400 | -1.37452200 |
| H | -6.21513400 | 3.34174400 | -0.75851100 |
| H | -4.82631400 | 3.00162600 | 0.29703200  |
| C | -4.73716100 | 5.69577200 | -0.31674000 |
| H | -4.43048700 | 5.48512200 | 0.70872600  |
| H | -5.80776000 | 5.92416800 | -0.32456200 |
| H | -4.19597900 | 6.57658200 | -0.67790000 |
| C | -4.93007700 | 4.81505100 | -2.65246500 |
| H | -4.70144000 | 3.97788200 | -3.31926800 |
| H | -4.42688600 | 5.71010600 | -3.03116300 |
| H | -6.01001600 | 4.98854600 | -2.66537600 |
| H | -3.88125200 | 0.19926100 | 0.27509000  |
| H | -2.83127700 | 1.37679900 | 1.11002700  |

Zero-point correction= 1.017705 (Hartree/Particle)

Thermal correction to Energy= 1.081293

Thermal correction to Enthalpy= 1.082237

Thermal correction to Gibbs Free Energy= 0.912270

Sum of electronic and zero-point Energies= -2811.578432

Sum of electronic and thermal Energies= -2811.514845

Sum of electronic and thermal Enthalpies= -2811.513901

Sum of electronic and thermal Free Energies= -2811.683867

E(RM062X/6-311+G(2d,p)) = -2813.47813451

**3k-RS-TS4-CONF2**

|   |             |             |             |
|---|-------------|-------------|-------------|
| C | -2.18338300 | 0.66206700  | -0.80567600 |
| H | -1.87094400 | 1.31983400  | -1.60969200 |
| H | -1.96632000 | -0.39032700 | -0.96697200 |
| C | -3.26276200 | 1.02808400  | -0.03128900 |
| C | -3.86077400 | 2.34292600  | -0.08913500 |
| O | -4.76649900 | 2.74056400  | 0.64064400  |
| O | -3.36461400 | 3.11951500  | -1.07734000 |
| C | -3.77503700 | 4.48644300  | -1.06977400 |
| H | -4.85242200 | 4.54423700  | -1.26145900 |
| H | -3.58515600 | 4.91297400  | -0.08025200 |
| C | -2.97587900 | 5.19960700  | -2.13801200 |
| H | -3.15495300 | 4.75033700  | -3.11988800 |
| H | -1.90851500 | 5.13927300  | -1.90798500 |
| H | -3.26898700 | 6.25311700  | -2.18277900 |
| C | -3.70670400 | 0.14420500  | 1.08674800  |
| H | -4.16152300 | 0.72705600  | 1.88958200  |
| H | -2.87175200 | -0.43804200 | 1.48287000  |
| N | -4.73220200 | -0.85907500 | 0.66459200  |
| C | -5.98857800 | -0.44109300 | 0.39499600  |
| H | -6.16553100 | 0.62045100  | 0.54181000  |
| C | -6.95787300 | -1.30347300 | -0.03741700 |
| H | -7.94752900 | -0.91099400 | -0.22880000 |
| C | -4.39984200 | -2.15315600 | 0.48143700  |
| H | -3.36512600 | -2.40769500 | 0.69251600  |
| C | -5.31362600 | -3.07686500 | 0.04514400  |
| H | -4.98645600 | -4.09972100 | -0.08514800 |
| C | -6.65298100 | -2.68239600 | -0.22433500 |
| N | -7.58177000 | -3.56023700 | -0.63478000 |
| C | -8.93953000 | -3.11125100 | -0.91588200 |

|   |             |             |             |
|---|-------------|-------------|-------------|
| H | -9.53048400 | -3.96588700 | -1.24045800 |
| H | -8.94716300 | -2.35960500 | -1.71249400 |
| H | -9.40495000 | -2.68410400 | -0.02112600 |
| C | -7.23404500 | -4.96495400 | -0.80584700 |
| H | -8.12589600 | -5.51244700 | -1.10638400 |
| H | -6.86273500 | -5.39191800 | 0.13163700  |
| H | -6.46894200 | -5.09000200 | -1.57978100 |
| N | -0.42691300 | 0.72005300  | 0.21804700  |
| N | 0.34222600  | -0.39454300 | -0.10363700 |
| C | -0.13465400 | -1.64414500 | 0.19488200  |
| O | -1.16236700 | -1.88123800 | 0.80696500  |
| O | 0.71127000  | -2.58854600 | -0.25066400 |
| C | 0.25201700  | -3.95715800 | -0.20690500 |
| H | -0.22021600 | -4.11716200 | 0.76636000  |
| C | -0.74610500 | -4.18844100 | -1.32877300 |
| H | -0.27143600 | -3.99975300 | -2.29743200 |
| H | -1.60963600 | -3.52468500 | -1.22694500 |
| H | -1.09907800 | -5.22422700 | -1.30813900 |
| C | 1.50090700  | -4.80505200 | -0.34464400 |
| H | 1.96053200  | -4.64291200 | -1.32532300 |
| H | 1.24566200  | -5.86449800 | -0.25057500 |
| H | 2.22942000  | -4.54703700 | 0.42944100  |
| C | -0.56308600 | 0.99207900  | 1.52083400  |
| O | -1.23043200 | 1.97605000  | 1.90619000  |
| O | -0.00817200 | 0.14593000  | 2.40679900  |
| C | -0.02887100 | 0.55772300  | 3.78627300  |
| H | -1.00446300 | 1.00638100  | 3.99129400  |
| C | 1.07158400  | 1.57925400  | 4.02092500  |
| H | 2.04919600  | 1.13042900  | 3.81759700  |
| H | 1.04976100  | 1.93094500  | 5.05765900  |

|   |             |             |             |
|---|-------------|-------------|-------------|
| H | 0.93981600  | 2.43577600  | 3.35331600  |
| C | 0.14167800  | -0.70851800 | 4.60356600  |
| H | 1.10404400  | -1.18199000 | 4.38524300  |
| H | -0.65578900 | -1.42232100 | 4.37621600  |
| H | 0.10578600  | -0.47201600 | 5.67142400  |
| C | 1.37322700  | -0.20996900 | -1.11485600 |
| C | 1.51128100  | 1.25776600  | -1.50998700 |
| H | 1.73337500  | 1.85631400  | -0.62489500 |
| C | 1.07935700  | -1.03655400 | -2.39662400 |
| O | 0.00222900  | -0.99852600 | -2.96014100 |
| C | 2.30623600  | -1.72108600 | -2.74743200 |
| H | 2.49439900  | -2.25514900 | -3.66868400 |
| C | 3.20664600  | -1.53493100 | -1.74497700 |
| N | 2.70287800  | -0.73733400 | -0.72452700 |
| C | 3.15206400  | -0.64039200 | 0.59071700  |
| O | 2.81242200  | 0.25836400  | 1.32506600  |
| O | 3.94846800  | -1.66477800 | 0.89086000  |
| C | 4.72308400  | -1.68418300 | 2.13043500  |
| C | 5.56580400  | -2.94325000 | 1.97449800  |
| H | 4.92532200  | -3.82583500 | 1.88196100  |
| H | 6.20982800  | -3.06887300 | 2.84976500  |
| H | 6.19513200  | -2.87185500 | 1.08104800  |
| C | 5.61400000  | -0.45058300 | 2.21982800  |
| H | 5.02453900  | 0.46489700  | 2.29854600  |
| H | 6.26410600  | -0.38806000 | 1.34098900  |
| H | 6.24749400  | -0.53375500 | 3.10849700  |
| C | 3.77641200  | -1.80156400 | 3.31806800  |
| H | 3.19413800  | -0.88686800 | 3.44245200  |
| H | 4.35554100  | -1.98144900 | 4.22943000  |
| H | 3.09085300  | -2.64292600 | 3.17058000  |

|   |             |             |             |
|---|-------------|-------------|-------------|
| C | 4.61512100  | -1.97516300 | -1.78275500 |
| C | 7.28347100  | -2.77100400 | -1.98177700 |
| C | 4.93222400  | -3.25650600 | -2.23765400 |
| C | 5.64116100  | -1.08757000 | -1.43636300 |
| C | 6.96911600  | -1.48330700 | -1.54233900 |
| C | 6.26439000  | -3.65493200 | -2.32816600 |
| H | 4.13434500  | -3.94365500 | -2.50424800 |
| H | 5.39405700  | -0.08449500 | -1.09736800 |
| H | 7.76091800  | -0.78752800 | -1.28137100 |
| H | 6.50403600  | -4.65706900 | -2.66996800 |
| H | 8.32136200  | -3.08095800 | -2.05664900 |
| C | 1.75903300  | 5.81172500  | -0.95131000 |
| C | 1.46677400  | 6.83000000  | -2.04744400 |
| H | 0.72886000  | 7.56086200  | -1.70227200 |
| H | 1.07214700  | 6.33032400  | -2.93777300 |
| H | 2.38364200  | 7.36029700  | -2.32088700 |
| C | 2.73679100  | 4.75477300  | -1.45541900 |
| H | 2.98906400  | 4.04077600  | -0.66979400 |
| H | 3.65513800  | 5.24438700  | -1.79562800 |
| H | 2.30040200  | 4.21665300  | -2.30402500 |
| C | 2.26300700  | 6.51313500  | 0.30591500  |
| H | 2.48784900  | 5.79569400  | 1.09640100  |
| H | 1.50979800  | 7.22041000  | 0.66869100  |
| H | 3.17317300  | 7.07308300  | 0.06823100  |
| O | 0.45292000  | 5.21915100  | -0.70984500 |
| C | 0.29637100  | 4.25783800  | 0.21272400  |
| O | 1.18360300  | 3.79066000  | 0.90201400  |
| O | -0.97191200 | 3.91695900  | 0.24755300  |
| H | -1.09383400 | 3.13147700  | 0.88717100  |
| H | 0.58570100  | 1.61563600  | -1.96654700 |

|                                              |            |            |                             |
|----------------------------------------------|------------|------------|-----------------------------|
| H                                            | 2.32739700 | 1.33853200 | -2.23485200                 |
| Zero-point correction=                       |            |            | 1.017961 (Hartree/Particle) |
| Thermal correction to Energy=                |            |            | 1.081267                    |
| Thermal correction to Enthalpy=              |            |            | 1.082211                    |
| Thermal correction to Gibbs Free Energy=     |            |            | 0.915517                    |
| Sum of electronic and zero-point Energies=   |            |            | -2811.577452                |
| Sum of electronic and thermal Energies=      |            |            | -2811.514147                |
| Sum of electronic and thermal Enthalpies=    |            |            | -2811.513202                |
| Sum of electronic and thermal Free Energies= |            |            | -2811.679897                |
| E(RM062X/6-311+G(2d,p)) =                    |            |            | -2813.47764516              |

**3k-RS-TS4-CONF3**

|   |             |             |             |
|---|-------------|-------------|-------------|
| C | -2.18348000 | 0.66220600  | -0.80557500 |
| H | -1.87098500 | 1.31991900  | -1.60961200 |
| H | -1.96648700 | -0.39021000 | -0.96681900 |
| C | -3.26281900 | 1.02833600  | -0.03119600 |
| C | -3.86076600 | 2.34320700  | -0.08912500 |
| O | -4.76661600 | 2.74085900  | 0.64049100  |
| O | -3.36438300 | 3.11980200  | -1.07720800 |
| C | -3.77479600 | 4.48673500  | -1.06972500 |
| H | -3.58509400 | 4.91326800  | -0.08016700 |
| H | -4.85214700 | 4.54453600  | -1.26160200 |
| C | -2.97544800 | 5.19989700  | -2.13782300 |
| H | -1.90812300 | 5.13954600  | -1.90762100 |
| H | -3.15436700 | 4.75063700  | -3.11973200 |
| H | -3.26854000 | 6.25340900  | -2.18262900 |
| C | -3.70689600 | 0.14449900  | 1.08682100  |
| H | -2.87199500 | -0.43774600 | 1.48305900  |
| H | -4.16179600 | 0.72738700  | 1.88958300  |
| N | -4.73236100 | -0.85877700 | 0.66457600  |

|   |             |             |             |
|---|-------------|-------------|-------------|
| C | -4.40005600 | -2.15290500 | 0.48165600  |
| H | -3.36539700 | -2.40748600 | 0.69295900  |
| C | -5.31382400 | -3.07660800 | 0.04531400  |
| H | -4.98670200 | -4.09950500 | -0.08478700 |
| C | -5.98865300 | -0.44074100 | 0.39466700  |
| H | -6.16556500 | 0.62083600  | 0.54130600  |
| C | -6.95792400 | -1.30310800 | -0.03781900 |
| H | -7.94751500 | -0.91058100 | -0.22944900 |
| C | -6.65310100 | -2.68208200 | -0.22446400 |
| N | -7.58188600 | -3.55992000 | -0.63492400 |
| C | -7.23425300 | -4.96470100 | -0.80564100 |
| H | -8.12611600 | -5.51219300 | -1.10614400 |
| H | -6.46907700 | -5.08998800 | -1.57946700 |
| H | -6.86307800 | -5.39147900 | 0.13198000  |
| C | -8.93954300 | -3.11086100 | -0.91641000 |
| H | -9.53050800 | -3.96550600 | -1.24094200 |
| H | -9.40511900 | -2.68349100 | -0.02184200 |
| H | -8.94693100 | -2.35937900 | -1.71317700 |
| N | -0.42693500 | 0.72009000  | 0.21813600  |
| C | -0.56306300 | 0.99220100  | 1.52090800  |
| O | -1.23026200 | 1.97628700  | 1.90622300  |
| O | -0.00826100 | 0.14600600  | 2.40690400  |
| C | -0.02886000 | 0.55784600  | 3.78635900  |
| H | -1.00440300 | 1.00659700  | 3.99141500  |
| C | 0.14162800  | -0.70838900 | 4.60367400  |
| H | 1.10394900  | -1.18193600 | 4.38530800  |
| H | 0.10581100  | -0.47186600 | 5.67153000  |
| H | -0.65590200 | -1.42213800 | 4.37637800  |
| C | 1.07170000  | 1.57928100  | 4.02094200  |
| H | 2.04926300  | 1.13034200  | 3.81763200  |



|   |             |             |             |
|---|-------------|-------------|-------------|
| H | 0.94001400  | 2.43577400  | 3.35328000  |
| H | 1.04992300  | 1.93103600  | 5.05765400  |
| C | 0.29684700  | 4.25786300  | 0.21265100  |
| O | 1.18400200  | 3.79057100  | 0.90196200  |
| O | -0.97148000 | 3.91713700  | 0.24744200  |
| H | -1.09351100 | 3.13169900  | 0.88708000  |
| O | 0.45353100  | 5.21916400  | -0.70990500 |
| C | 1.75972900  | 5.81155600  | -0.95135900 |
| C | 2.73733900  | 4.75446100  | -1.45545700 |
| H | 2.30088800  | 4.21641400  | -2.30407700 |
| H | 3.65576800  | 5.24394000  | -1.79564200 |
| H | 2.98948800  | 4.04041900  | -0.66983200 |
| C | 2.26379200  | 6.51289800  | 0.30586800  |
| H | 2.48853900  | 5.79542800  | 1.09635400  |
| H | 3.17403200  | 7.07272600  | 0.06818600  |
| H | 1.51067600  | 7.22027200  | 0.66864300  |
| C | 1.46762200  | 6.82987200  | -2.04749500 |
| H | 1.07291800  | 6.33025300  | -2.93782200 |
| H | 0.72981900  | 7.56084600  | -1.70232300 |
| H | 2.38457000  | 7.36003100  | -2.32094000 |
| N | 0.34210300  | -0.39458500 | -0.10351100 |
| C | -0.13487200 | -1.64413600 | 0.19506300  |
| O | -1.16262500 | -1.88112900 | 0.80711600  |
| O | 0.71101600  | -2.58861600 | -0.25039300 |
| C | 0.25164300  | -3.95718700 | -0.20666700 |
| H | -0.22076400 | -4.11712500 | 0.76652400  |
| C | -0.74631700 | -4.18840800 | -1.32869000 |
| H | -0.27147200 | -3.99981500 | -2.29728100 |
| H | -1.60979200 | -3.52455100 | -1.22703300 |
| H | -1.09941200 | -5.22415300 | -1.30807000 |

|   |            |             |             |
|---|------------|-------------|-------------|
| C | 1.50048300 | -4.80519200 | -0.34417300 |
| H | 1.96032600 | -4.64307000 | -1.32475300 |
| H | 1.24512300 | -5.86461700 | -0.25018300 |
| H | 2.22885900 | -4.54726600 | 0.43007100  |
| C | 1.37307500 | -0.21014800 | -1.11478500 |
| C | 1.51123900 | 1.25755400  | -1.51001400 |
| H | 1.73344300 | 1.85614800  | -0.62497800 |
| C | 1.07907700 | -1.03679500 | -2.39648600 |
| O | 0.00191100 | -0.99875800 | -2.95992800 |
| C | 2.30590600 | -1.72139200 | -2.74735000 |
| H | 2.49399300 | -2.25547800 | -3.66860400 |
| C | 3.20639800 | -1.53520800 | -1.74497200 |
| N | 2.70271500 | -0.73757700 | -0.72450700 |
| C | 3.15197200 | -0.64065500 | 0.59071000  |
| O | 2.81238900 | 0.25809800  | 1.32508800  |
| O | 3.94837200 | -1.66506100 | 0.89079700  |
| C | 4.72307700 | -1.68448200 | 2.13031400  |
| C | 5.56575300 | -2.94357200 | 1.97430900  |
| H | 4.92524100 | -3.82614100 | 1.88182600  |
| H | 6.20985000 | -3.06921200 | 2.84952000  |
| H | 6.19500400 | -2.87219400 | 1.08080400  |
| C | 5.61403400 | -0.45090600 | 2.21963500  |
| H | 5.02460600 | 0.46459100  | 2.29839800  |
| H | 6.26406900 | -0.38840100 | 1.34074100  |
| H | 6.24759900 | -0.53409400 | 3.10825100  |
| C | 3.77649700 | -1.80183900 | 3.31802400  |
| H | 3.19427700 | -0.88711700 | 3.44247800  |
| H | 4.35569400 | -1.98177100 | 4.22933400  |
| H | 3.09088600 | -2.64316600 | 3.17057800  |
| C | 4.61488100 | -1.97540200 | -1.78284200 |

|   |            |             |             |
|---|------------|-------------|-------------|
| C | 7.28324900 | -2.77114000 | -1.98202900 |
| C | 4.93200200 | -3.25675300 | -2.23770400 |
| C | 5.64091000 | -1.08774700 | -1.43657300 |
| C | 6.96887400 | -1.48343500 | -1.54262900 |
| C | 6.26417800 | -3.65512700 | -2.32829900 |
| H | 4.13413200 | -3.94394700 | -2.50420600 |
| H | 5.39379000 | -0.08466200 | -1.09761600 |
| H | 7.76066600 | -0.78761000 | -1.28175500 |
| H | 6.50384200 | -4.65727000 | -2.67007200 |
| H | 8.32114800 | -3.08105200 | -2.05696600 |
| H | 0.58566900 | 1.61547800  | -1.96655200 |
| H | 2.32732100 | 1.33820100  | -2.23492900 |

Zero-point correction= 1.017963 (Hartree/Particle)

Thermal correction to Energy= 1.081268

Thermal correction to Enthalpy= 1.082212

Thermal correction to Gibbs Free Energy= 0.915520

Sum of electronic and zero-point Energies= -2811.577451

Sum of electronic and thermal Energies= -2811.514146

Sum of electronic and thermal Enthalpies= -2811.513201

Sum of electronic and thermal Free Energies= -2811.679893

E(RM062X/6-311+G(2d,p)) = -2813.47764531

### 3k-RS-TS4-CONF4

|   |             |             |             |
|---|-------------|-------------|-------------|
| C | -2.23676700 | 0.62144000  | -0.89786400 |
| H | -1.94758100 | 1.31176400  | -1.68278500 |
| H | -1.98420400 | -0.41800300 | -1.08788200 |
| C | -3.32236400 | 0.92755000  | -0.10698100 |
| C | -3.94150100 | 2.23392800  | -0.09881000 |
| O | -4.84569100 | 2.58309700  | 0.65690900  |
| O | -3.46345100 | 3.06352400  | -1.05238500 |

|   |             |             |             |
|---|-------------|-------------|-------------|
| C | -3.90532000 | 4.41921300  | -0.98861500 |
| H | -3.70814600 | 4.81442900  | 0.01246300  |
| H | -4.98686300 | 4.45783800  | -1.16034100 |
| C | -3.14223800 | 5.19008500  | -2.04312200 |
| H | -2.07016800 | 5.15066800  | -1.83178100 |
| H | -3.32535700 | 4.77065100  | -3.03733700 |
| H | -3.46390600 | 6.23615000  | -2.04610400 |
| C | -3.72665400 | -0.00293600 | 0.98819800  |
| H | -2.87318600 | -0.58585000 | 1.34199500  |
| H | -4.16853200 | 0.54435200  | 1.82269700  |
| N | -4.74908300 | -1.00522300 | 0.55723500  |
| C | -4.40486400 | -2.28757300 | 0.32153000  |
| H | -3.36079300 | -2.53367600 | 0.49276000  |
| C | -5.31866800 | -3.20968300 | -0.11795900 |
| H | -4.98248100 | -4.22310700 | -0.29108800 |
| C | -6.01809200 | -0.59648200 | 0.33735300  |
| H | -6.20497500 | 0.45666400  | 0.52633100  |
| C | -6.98733900 | -1.45751600 | -0.09766100 |
| H | -7.98759200 | -1.07363300 | -0.24605500 |
| C | -6.66959600 | -2.82487800 | -0.33914200 |
| N | -7.59748800 | -3.70092300 | -0.75565200 |
| C | -7.24079600 | -5.09773900 | -0.96790000 |
| H | -8.13639900 | -5.64871700 | -1.25053000 |
| H | -6.49945900 | -5.19859200 | -1.76815800 |
| H | -6.83551600 | -5.53990800 | -0.05183900 |
| C | -8.96468800 | -3.25861700 | -0.99931000 |
| H | -9.54599000 | -4.10414800 | -1.36284000 |
| H | -9.42764900 | -2.88466000 | -0.07965500 |
| H | -8.99093400 | -2.46763200 | -1.75626600 |
| N | -0.48295300 | 0.71883600  | 0.13060200  |

|   |             |             |             |
|---|-------------|-------------|-------------|
| C | -0.64405700 | 0.96170300  | 1.43654700  |
| O | -1.34802300 | 1.91685700  | 1.82911400  |
| O | -0.07546800 | 0.11574300  | 2.31388300  |
| C | -0.11948700 | 0.50167300  | 3.70000300  |
| H | -1.10711800 | 0.92413300  | 3.90337100  |
| C | 0.07276100  | -0.77580000 | 4.49468400  |
| H | 1.04295600  | -1.22810100 | 4.26563300  |
| H | 0.03450100  | -0.55983600 | 5.56684000  |
| H | -0.71286400 | -1.49910200 | 4.25555400  |
| C | 0.95536400  | 1.54316400  | 3.96389100  |
| H | 1.94466200  | 1.11767100  | 3.76651100  |
| H | 0.81323900  | 2.40616600  | 3.30658500  |
| H | 0.91300800  | 1.87843000  | 5.00546200  |
| C | 0.18978500  | 4.28653000  | 0.28336600  |
| O | 1.04779700  | 3.82167400  | 1.01054500  |
| O | -1.06785200 | 3.90909400  | 0.23100200  |
| H | -1.20387800 | 3.10468700  | 0.84258200  |
| O | 0.37145600  | 5.28030300  | -0.59849200 |
| C | 1.67060500  | 5.91890000  | -0.74098100 |
| C | 2.70912100  | 4.90867500  | -1.21838400 |
| H | 2.34468800  | 4.39268100  | -2.11336400 |
| H | 3.63293700  | 5.43538800  | -1.47912700 |
| H | 2.93086800  | 4.17150400  | -0.44510200 |
| C | 2.07580300  | 6.59248100  | 0.56617000  |
| H | 2.27829100  | 5.85654300  | 1.34549400  |
| H | 2.97866800  | 7.18925300  | 0.40145300  |
| H | 1.27893900  | 7.26242500  | 0.90578600  |
| C | 1.41299100  | 6.96473500  | -1.81972300 |
| H | 1.08397700  | 6.48434500  | -2.74651800 |
| H | 0.63668300  | 7.66459700  | -1.49524600 |

|   |             |             |             |
|---|-------------|-------------|-------------|
| H | 2.32896100  | 7.52717400  | -2.02280200 |
| N | 0.33761100  | -0.35487200 | -0.20292300 |
| C | -0.09188200 | -1.63103800 | 0.05440100  |
| O | -1.11174100 | -1.92625700 | 0.65487000  |
| O | 0.78361600  | -2.52797200 | -0.42873100 |
| C | 0.53404700  | -3.92184000 | -0.14752100 |
| H | -0.53430300 | -4.10755200 | -0.29092000 |
| C | 1.35856100  | -4.69052000 | -1.16131300 |
| H | 2.42227800  | -4.46575500 | -1.02436900 |
| H | 1.06995100  | -4.42376400 | -2.18224600 |
| H | 1.20940900  | -5.76548700 | -1.02352000 |
| C | 0.94118900  | -4.21995300 | 1.28486400  |
| H | 2.00764100  | -4.00593200 | 1.41321600  |
| H | 0.76461000  | -5.27517200 | 1.51509600  |
| H | 0.36840100  | -3.60737100 | 1.98630300  |
| C | 1.39245700  | -0.09367200 | -1.17501300 |
| C | 1.52903500  | 1.39899700  | -1.46358100 |
| H | 1.71927600  | 1.93809900  | -0.53352700 |
| C | 1.13573200  | -0.83031600 | -2.51769800 |
| O | 0.07705700  | -0.74741600 | -3.11025900 |
| C | 2.36949300  | -1.49646100 | -2.87644000 |
| H | 2.58077400  | -1.97733500 | -3.82162000 |
| C | 3.24142800  | -1.37927000 | -1.83932600 |
| N | 2.71559500  | -0.63932400 | -0.78689500 |
| C | 3.12597300  | -0.62476300 | 0.54458100  |
| O | 2.78149900  | 0.24126300  | 1.31503400  |
| O | 3.89143000  | -1.68061900 | 0.81691200  |
| C | 4.66258800  | -1.75332700 | 2.05868100  |
| C | 5.45539300  | -3.04071300 | 1.87692900  |
| H | 4.78012700  | -3.89616500 | 1.77307300  |

|   |            |             |             |
|---|------------|-------------|-------------|
| H | 6.09879300 | -3.20694200 | 2.74585300  |
| H | 6.08196900 | -2.97826400 | 0.98083100  |
| C | 5.59812700 | -0.55497400 | 2.17011100  |
| H | 5.04045800 | 0.38141000  | 2.23972700  |
| H | 6.27072500 | -0.51328800 | 1.30774400  |
| H | 6.20650000 | -0.66293800 | 3.07356500  |
| C | 3.72104800 | -1.85333500 | 3.25247000  |
| H | 3.18174100 | -0.91682500 | 3.40405700  |
| H | 4.30347000 | -2.07780600 | 4.15191800  |
| H | 2.99705300 | -2.66040600 | 3.10022200  |
| C | 4.64389300 | -1.83752100 | -1.86634000 |
| C | 7.30304500 | -2.66824300 | -2.04808000 |
| C | 4.95250400 | -3.08978200 | -2.40276200 |
| C | 5.67431300 | -0.99569900 | -1.43158000 |
| C | 6.99795800 | -1.40861400 | -1.52846700 |
| C | 6.27954900 | -3.50641200 | -2.48408100 |
| H | 4.15045200 | -3.73954700 | -2.74176200 |
| H | 5.43538400 | -0.01328000 | -1.03167500 |
| H | 7.79368100 | -0.74759500 | -1.19810500 |
| H | 6.51190100 | -4.48598700 | -2.89024400 |
| H | 8.33728500 | -2.99164800 | -2.11599100 |
| H | 0.61527300 | 1.78102400  | -1.92412600 |
| H | 2.36684500 | 1.53382600  | -2.15471800 |

Zero-point correction= 1.018169 (Hartree/Particle)

Thermal correction to Energy= 1.081358

Thermal correction to Enthalpy= 1.082302

Thermal correction to Gibbs Free Energy= 0.915067

Sum of electronic and zero-point Energies= -2811.576773

Sum of electronic and thermal Energies= -2811.513585

Sum of electronic and thermal Enthalpies= -2811.512640

Sum of electronic and thermal Free Energies= -2811.679876

E(RM062X/6-311+G(2d,p)) = -2813.47697217

**3k-RS-TS4**

|   |             |             |             |
|---|-------------|-------------|-------------|
| C | -2.21586000 | 0.71201100  | -0.77597900 |
| H | -1.89998700 | 1.34551000  | -1.59732300 |
| H | -1.99682200 | -0.34487500 | -0.90460100 |
| C | -3.28968300 | 1.09957400  | -0.00810900 |
| C | -3.85398100 | 2.43034800  | -0.06398300 |
| O | -4.76460700 | 2.84326500  | 0.64939300  |
| O | -3.30952100 | 3.20473300  | -1.02812700 |
| C | -3.71196800 | 4.57418200  | -1.04241200 |
| H | -3.48012500 | 5.02630100  | -0.07267700 |
| H | -4.79554500 | 4.63375500  | -1.19135900 |
| C | -2.95441100 | 5.25394100  | -2.16181000 |
| H | -1.87861800 | 5.19008900  | -1.97870900 |
| H | -3.18058200 | 4.78173900  | -3.12291600 |
| H | -3.24238000 | 6.30816400  | -2.21995300 |
| C | -3.76275200 | 0.22566400  | 1.10545700  |
| H | -2.93273100 | -0.32114000 | 1.55850100  |
| H | -4.28047400 | 0.81063800  | 1.86790500  |
| N | -4.72982000 | -0.81655700 | 0.64265600  |
| C | -4.35787200 | -2.10743900 | 0.52805700  |
| H | -3.34156200 | -2.33356200 | 0.83811100  |
| C | -5.20993600 | -3.06179100 | 0.03541800  |
| H | -4.85264600 | -4.08053400 | -0.03412900 |
| C | -5.96616700 | -0.43454600 | 0.25349600  |
| H | -6.17816700 | 0.62560400  | 0.35548400  |
| C | -6.87545100 | -1.32792800 | -0.24056100 |
| H | -7.85092800 | -0.96188400 | -0.53131300 |



|   |             |             |             |
|---|-------------|-------------|-------------|
| C | -6.52428300 | -2.70260100 | -0.37159700 |
| N | -7.38838100 | -3.60719100 | -0.85789600 |
| C | -6.98514600 | -5.00056600 | -0.99719500 |
| H | -7.81650900 | -5.56691000 | -1.41361300 |
| H | -6.12620700 | -5.09435700 | -1.67029900 |
| H | -6.72142700 | -5.43049700 | -0.02507900 |
| C | -8.72317200 | -3.19458300 | -1.27309700 |
| H | -9.26981200 | -4.07085200 | -1.61696000 |
| H | -9.27201400 | -2.74794600 | -0.43760300 |
| H | -8.67339200 | -2.46919200 | -2.09244500 |
| N | -0.43815500 | 0.82472600  | 0.23368500  |
| C | -0.56822600 | 1.21614000  | 1.50535800  |
| O | -1.25619500 | 2.21729200  | 1.80091800  |
| O | 0.03771200  | 0.48442700  | 2.45700800  |
| C | -0.09349000 | 0.94947900  | 3.81171500  |
| H | -0.06724500 | 2.04246400  | 3.80053700  |
| C | -1.41734100 | 0.46899100  | 4.38303300  |
| H | -1.47262000 | -0.62403700 | 4.32941300  |
| H | -1.51465500 | 0.77252000  | 5.43048300  |
| H | -2.25048000 | 0.89627900  | 3.81882200  |
| C | 1.10732600  | 0.40300500  | 4.55837500  |
| H | 1.10601300  | -0.69227400 | 4.53580300  |
| H | 2.03131900  | 0.76235900  | 4.09763500  |
| H | 1.08198300  | 0.72969900  | 5.60258500  |
| C | 0.49315800  | 4.30488200  | 0.07051700  |
| O | 1.30072400  | 3.81439500  | 0.83599700  |
| O | -0.79561700 | 4.04338300  | 0.03129900  |
| H | -1.01239500 | 3.30772700  | 0.69884300  |
| O | 0.76731800  | 5.21339800  | -0.87770600 |
| C | 2.11854500  | 5.72557300  | -1.04372500 |

|   |             |             |             |
|---|-------------|-------------|-------------|
| C | 3.07305900  | 4.59867200  | -1.42653600 |
| H | 2.67167600  | 4.04355400  | -2.28142700 |
| H | 4.03789300  | 5.02619800  | -1.71849700 |
| H | 3.23073400  | 3.91035300  | -0.59473400 |
| C | 2.56483500  | 6.45765200  | 0.21773600  |
| H | 2.68892800  | 5.76708200  | 1.05309300  |
| H | 3.52055500  | 6.95683900  | 0.02840000  |
| H | 1.82748500  | 7.21998900  | 0.49036300  |
| C | 1.96602200  | 6.70578500  | -2.20112000 |
| H | 1.61301900  | 6.18661400  | -3.09765500 |
| H | 1.24575500  | 7.48911400  | -1.94551600 |
| H | 2.92884000  | 7.17460600  | -2.42414700 |
| N | 0.33028100  | -0.31489100 | 0.00549400  |
| C | -0.16886800 | -1.53197900 | 0.38816700  |
| O | -1.18002200 | -1.70480500 | 1.04826800  |
| O | 0.63226700  | -2.52626300 | -0.03331600 |
| C | 0.12635100  | -3.87315200 | 0.08933200  |
| H | -0.33366800 | -3.96718600 | 1.07680700  |
| C | -0.89953600 | -4.12195400 | -1.00356100 |
| H | -0.43368800 | -4.00572600 | -1.98785200 |
| H | -1.73256200 | -3.41677000 | -0.92615800 |
| H | -1.29584500 | -5.13896000 | -0.92186300 |
| C | 1.34021300  | -4.77331300 | -0.02585700 |
| H | 1.79835300  | -4.66368900 | -1.01445700 |
| H | 1.04460800  | -5.81796400 | 0.10750800  |
| H | 2.08373600  | -4.51748100 | 0.73421300  |
| C | 1.33405800  | -0.22034300 | -1.04756400 |
| C | 1.53410300  | 1.22474300  | -1.49652900 |
| H | 1.80388400  | 1.83656500  | -0.63358700 |
| C | 0.95483700  | -1.07737700 | -2.28673200 |

|   |             |             |             |
|---|-------------|-------------|-------------|
| O | -0.14097700 | -1.01478500 | -2.81093100 |
| C | 2.13667000  | -1.82565700 | -2.66039300 |
| H | 2.26684000  | -2.39562300 | -3.57007300 |
| C | 3.08257900  | -1.64384600 | -1.70050300 |
| N | 2.65181000  | -0.79611500 | -0.68680600 |
| C | 3.16042600  | -0.69168400 | 0.60662600  |
| O | 2.89233500  | 0.23416100  | 1.33656100  |
| O | 3.92482600  | -1.74581100 | 0.88759500  |
| C | 4.77615000  | -1.78424300 | 2.07443400  |
| C | 5.58719400  | -3.05544900 | 1.85767400  |
| H | 4.92699500  | -3.92559700 | 1.78858400  |
| H | 6.27459900  | -3.20414200 | 2.69562100  |
| H | 6.16904200  | -2.98326100 | 0.93255000  |
| C | 5.69227700  | -0.56669400 | 2.11823300  |
| H | 5.12759700  | 0.35689200  | 2.25718300  |
| H | 6.27603500  | -0.49818700 | 1.19434100  |
| H | 6.38930500  | -0.67824400 | 2.95469900  |
| C | 3.90191800  | -1.89453200 | 3.31597200  |
| H | 3.32633500  | -0.98062200 | 3.46669800  |
| H | 4.53390200  | -2.06453700 | 4.19353000  |
| H | 3.21056800  | -2.73817300 | 3.21783200  |
| C | 4.47230000  | -2.13622900 | -1.78150200 |
| C | 7.10177800  | -3.02972100 | -2.06466500 |
| C | 4.72651400  | -3.44840300 | -2.18432700 |
| C | 5.54100000  | -1.26747900 | -1.52903700 |
| C | 6.84934400  | -1.71198600 | -1.67740000 |
| C | 6.03990500  | -3.89525600 | -2.31624200 |
| H | 3.89571200  | -4.12071400 | -2.37883200 |
| H | 5.34125700  | -0.24151500 | -1.22946800 |
| H | 7.67404000  | -1.03094300 | -1.48951700 |

|                                              |            |             |                             |
|----------------------------------------------|------------|-------------|-----------------------------|
| H                                            | 6.23136000 | -4.92067400 | -2.61695400                 |
| H                                            | 8.12460300 | -3.37774800 | -2.17242500                 |
| H                                            | 0.61980200 | 1.61695900  | -1.94675900                 |
| H                                            | 2.33971500 | 1.23995000  | -2.23722600                 |
| Zero-point correction=                       |            |             | 1.017697 (Hartree/Particle) |
| Thermal correction to Energy=                |            |             | 1.081145                    |
| Thermal correction to Enthalpy=              |            |             | 1.082089                    |
| Thermal correction to Gibbs Free Energy=     |            |             | 0.914441                    |
| Sum of electronic and zero-point Energies=   |            |             | -2811.576165                |
| Sum of electronic and thermal Energies=      |            |             | -2811.512718                |
| Sum of electronic and thermal Enthalpies=    |            |             | -2811.511774                |
| Sum of electronic and thermal Free Energies= |            |             | -2811.679422                |
| E(RM062X/6-311+G(2d,p)) =                    |            |             | -2813.47677735              |

#### **RR-TS4**

|   |             |            |             |
|---|-------------|------------|-------------|
| C | 0.02035100  | 1.58509300 | -0.60276700 |
| H | -0.45324600 | 1.19341000 | -1.49348900 |
| H | 0.93404900  | 1.07006500 | -0.31321700 |
| C | -0.12247000 | 2.92456200 | -0.29828700 |
| C | -1.09813900 | 3.77279900 | -0.94160300 |
| O | -1.27370500 | 4.96442100 | -0.69456900 |
| O | -1.80896400 | 3.14576700 | -1.90724600 |
| C | -2.86420100 | 3.90027500 | -2.50218500 |
| H | -3.60869700 | 4.14041000 | -1.73506100 |
| H | -2.46451000 | 4.84376400 | -2.88800600 |
| C | -3.46303900 | 3.05553100 | -3.60549200 |
| H | -3.86954900 | 2.12862600 | -3.19357500 |
| H | -2.70423300 | 2.80801600 | -4.35439200 |
| H | -4.26806500 | 3.60755700 | -4.10058400 |
| C | 0.58373000  | 3.51341800 | 0.87678800  |

|   |             |             |             |
|---|-------------|-------------|-------------|
| H | 0.65861500  | 2.79898600  | 1.69818300  |
| H | 0.08149500  | 4.41986900  | 1.21887700  |
| N | 1.99099000  | 3.90817100  | 0.55519800  |
| C | 3.03570500  | 3.17786200  | 0.99342300  |
| H | 2.78410900  | 2.33005000  | 1.62412900  |
| C | 4.32633500  | 3.48511000  | 0.64626400  |
| H | 5.12274500  | 2.85951400  | 1.02694400  |
| C | 2.20223400  | 4.96374300  | -0.26132900 |
| H | 1.30633700  | 5.48229800  | -0.59009000 |
| C | 3.45975300  | 5.33928600  | -0.64467400 |
| H | 3.56561200  | 6.19848600  | -1.29314200 |
| C | 4.59186800  | 4.60078500  | -0.19424300 |
| N | 5.84115800  | 4.94047800  | -0.54920800 |
| C | 6.97448400  | 4.16137500  | -0.06800600 |
| H | 7.89354500  | 4.61505600  | -0.43501400 |
| H | 6.92417700  | 3.12864700  | -0.43008500 |
| H | 7.00455800  | 4.15122200  | 1.02664200  |
| C | 6.06766800  | 6.07911600  | -1.43039900 |
| H | 7.13703200  | 6.17671500  | -1.60871800 |
| H | 5.70296200  | 7.00600900  | -0.97527300 |
| H | 5.56579300  | 5.93583900  | -2.39323200 |
| N | -0.96591000 | 0.35403000  | 0.65111800  |
| N | -0.18703100 | -0.70986300 | 1.11112300  |
| C | 0.96254200  | -0.42260600 | 1.79905500  |
| O | 1.32657400  | 0.69854000  | 2.11614800  |
| O | 1.65726700  | -1.53547000 | 2.07638700  |
| C | 2.95617200  | -1.37201800 | 2.68472900  |
| H | 2.88147200  | -0.56986500 | 3.42356800  |
| C | 3.26516200  | -2.69381300 | 3.35922400  |
| H | 3.34217600  | -3.49340700 | 2.61487400  |

|   |             |             |             |
|---|-------------|-------------|-------------|
| H | 2.48045900  | -2.95347200 | 4.07559600  |
| H | 4.21764700  | -2.62311400 | 3.89260400  |
| C | 3.95688900  | -1.01141200 | 1.60003400  |
| H | 3.96076600  | -1.79216000 | 0.83134700  |
| H | 4.96250800  | -0.92458700 | 2.02314400  |
| H | 3.69132600  | -0.05806000 | 1.13277300  |
| C | -1.63324500 | 1.03138100  | 1.60105000  |
| O | -2.37755000 | 1.98736500  | 1.31454200  |
| O | -1.45043700 | 0.64445600  | 2.87832200  |
| C | -2.25386200 | 1.29042400  | 3.88417700  |
| H | -2.28500300 | 2.36025000  | 3.65836900  |
| C | -1.53000800 | 1.04340500  | 5.19440200  |
| H | -1.46433100 | -0.03211400 | 5.39055100  |
| H | -2.07060000 | 1.51701000  | 6.01940500  |
| H | -0.51585300 | 1.45223300  | 5.15766000  |
| C | -3.66014800 | 0.71406900  | 3.86738200  |
| H | -3.62754100 | -0.35530500 | 4.10567100  |
| H | -4.12113000 | 0.84800800  | 2.88401700  |
| H | -4.27989300 | 1.21601600  | 4.61808900  |
| C | -0.53080700 | -2.08085000 | 0.72918000  |
| C | -1.93890300 | -2.13771000 | 0.07100200  |
| H | -1.94486600 | -1.31336800 | -0.64501300 |
| C | -3.06292100 | -1.91947300 | 1.08778900  |
| H | -3.97673500 | -1.62900100 | 0.56014900  |
| H | -2.82435600 | -1.14552100 | 1.81903900  |
| H | -3.27099600 | -2.83947700 | 1.64399600  |
| C | -2.17292600 | -3.44093400 | -0.69404600 |
| H | -2.08475100 | -4.32083900 | -0.04678300 |
| H | -1.48082800 | -3.55322000 | -1.53334500 |
| H | -3.19005100 | -3.43043000 | -1.09965200 |

|   |             |             |             |
|---|-------------|-------------|-------------|
| C | -0.46288400 | -3.04862500 | 1.95237100  |
| O | -1.04477100 | -2.84521700 | 2.99761200  |
| C | 0.35013500  | -4.18325800 | 1.55262600  |
| H | 0.48195100  | -5.09296100 | 2.12215300  |
| C | 0.90255500  | -3.92057900 | 0.34161500  |
| N | 0.49106500  | -2.69086800 | -0.16101300 |
| C | 1.03415000  | -1.95727300 | -1.20564700 |
| O | 0.39591500  | -1.11177200 | -1.79457800 |
| O | 2.30788500  | -2.28043500 | -1.41835000 |
| C | 3.03341200  | -1.74921000 | -2.57406900 |
| C | 4.38196700  | -2.44859400 | -2.46605200 |
| H | 4.88535700  | -2.17507100 | -1.53327000 |
| H | 5.01935000  | -2.15553700 | -3.30535100 |
| H | 4.24897800  | -3.53533500 | -2.48780900 |
| C | 2.33032100  | -2.14139400 | -3.86841700 |
| H | 1.34167000  | -1.68493400 | -3.94268900 |
| H | 2.23322900  | -3.22992500 | -3.93259300 |
| H | 2.93394900  | -1.80187400 | -4.71598200 |
| C | 3.18982200  | -0.23895200 | -2.43412300 |
| H | 2.23523200  | 0.27502700  | -2.55984500 |
| H | 3.88712300  | 0.12116200  | -3.19740700 |
| H | 3.60254100  | 0.00762700  | -1.44964100 |
| C | 1.72655900  | -4.86417700 | -0.43849800 |
| C | 3.21783300  | -6.74738200 | -1.86359600 |
| C | 2.70933100  | -5.61755000 | 0.20811000  |
| C | 1.48532300  | -5.06663100 | -1.80278600 |
| C | 2.22488100  | -6.00795900 | -2.50917200 |
| C | 3.45759900  | -6.55100500 | -0.50576000 |
| H | 2.89389600  | -5.46061300 | 1.26713100  |
| H | 0.70876500  | -4.49528000 | -2.30590300 |

|   |             |             |             |
|---|-------------|-------------|-------------|
| H | 2.02595800  | -6.16678500 | -3.56483900 |
| H | 4.22776000  | -7.12406600 | 0.00117800  |
| H | 3.79851800  | -7.47771900 | -2.41882600 |
| C | -4.86207500 | 0.83434000  | -0.45797300 |
| O | -5.27178500 | 0.77689300  | 0.68460000  |
| O | -3.68974600 | 1.29702600  | -0.84017300 |
| H | -3.15973700 | 1.60473900  | -0.03702800 |
| O | -5.53303900 | 0.44105200  | -1.54901300 |
| C | -6.88438300 | -0.08822000 | -1.43529200 |
| C | -6.88306600 | -1.37584800 | -0.61758600 |
| H | -6.15585800 | -2.08288300 | -1.03155600 |
| H | -7.87475000 | -1.83701800 | -0.66796700 |
| H | -6.63876000 | -1.18219000 | 0.42809500  |
| C | -7.81856600 | 0.96715100  | -0.85194300 |
| H | -7.58326500 | 1.17237800  | 0.19332100  |
| H | -8.85176900 | 0.61149200  | -0.91768600 |
| H | -7.73856000 | 1.89665500  | -1.42543400 |
| C | -7.25314800 | -0.38025400 | -2.88503800 |
| H | -6.55790600 | -1.10628300 | -3.31768900 |
| H | -7.21496200 | 0.53696300  | -3.48093000 |
| H | -8.26586200 | -0.79031200 | -2.93777200 |

Zero-point correction= 1.075044 (Hartree/Particle)

Thermal correction to Energy= 1.141253

Thermal correction to Enthalpy= 1.142197

Thermal correction to Gibbs Free Energy= 0.967944

Sum of electronic and zero-point Energies= -2890.105479

Sum of electronic and thermal Energies= -2890.039271

Sum of electronic and thermal Enthalpies= -2890.038327

Sum of electronic and thermal Free Energies= -2890.212579

E(RM062X/6-311+G(2d,p)) = -2892.08512891



**RS-TS4**

|   |             |             |             |
|---|-------------|-------------|-------------|
| C | -2.27025800 | 0.60104300  | -0.83724100 |
| H | -2.01715000 | 1.24281100  | -1.67260700 |
| H | -2.07952100 | -0.45469600 | -1.00743800 |
| C | -3.32916400 | 0.97944800  | -0.03135700 |
| C | -3.89515100 | 2.30548200  | -0.06823200 |
| O | -4.80390900 | 2.71039500  | 0.65534400  |
| O | -3.35894300 | 3.09624400  | -1.02723200 |
| C | -3.78435300 | 4.45806400  | -1.03565700 |
| H | -3.56223300 | 4.91044700  | -0.06383400 |
| H | -4.86856600 | 4.50047000  | -1.18676800 |
| C | -3.03647200 | 5.15597300  | -2.15053900 |
| H | -1.96036500 | 5.11252900  | -1.96344800 |
| H | -3.24956800 | 4.68212800  | -3.11381300 |
| H | -3.34422200 | 6.20472400  | -2.20680200 |
| C | -3.75525200 | 0.11445100  | 1.10646500  |
| H | -2.91769700 | -0.46698100 | 1.49746500  |
| H | -4.19462500 | 0.71173600  | 1.90749600  |
| N | -4.79577900 | -0.88935500 | 0.71864800  |
| C | -4.48371100 | -2.19269100 | 0.57314500  |
| H | -3.45132000 | -2.45544100 | 0.78459300  |
| C | -5.41345600 | -3.11558700 | 0.16906900  |
| H | -5.10201100 | -4.14659300 | 0.06763800  |
| C | -6.04687500 | -0.46055900 | 0.44201100  |
| H | -6.20563600 | 0.60798400  | 0.55642900  |
| C | -7.03146700 | -1.32093200 | 0.04117900  |
| H | -8.01540800 | -0.91941900 | -0.16045100 |
| C | -6.74814600 | -2.70932200 | -0.10544900 |
| N | -7.69180600 | -3.58521000 | -0.48580200 |

|   |             |             |             |
|---|-------------|-------------|-------------|
| C | -7.36165000 | -4.99715700 | -0.62930400 |
| H | -8.25941500 | -5.53892000 | -0.92249800 |
| H | -6.59637700 | -5.14598500 | -1.39873500 |
| H | -6.99779700 | -5.41160700 | 0.31682200  |
| C | -9.04614700 | -3.12627900 | -0.76741700 |
| H | -9.65448000 | -3.98373200 | -1.04973900 |
| H | -9.49275800 | -2.65740800 | 0.11580500  |
| H | -9.05362500 | -2.40624800 | -1.59283700 |
| N | -0.50257900 | 0.70788200  | 0.08756500  |
| C | -0.63178600 | 1.04363000  | 1.38256000  |
| O | -1.27679000 | 2.05657700  | 1.71514300  |
| O | -0.09874200 | 0.22278700  | 2.30271700  |
| C | -0.11649700 | 0.68861000  | 3.66560300  |
| H | -1.06910000 | 1.19666800  | 3.83711500  |
| C | -0.02738900 | -0.55125000 | 4.53432800  |
| H | 0.90930900  | -1.08564400 | 4.34917500  |
| H | -0.06377400 | -0.27020500 | 5.59132400  |
| H | -0.86080400 | -1.22837300 | 4.32375300  |
| C | 1.03488000  | 1.65790500  | 3.87214600  |
| H | 1.98689000  | 1.15297800  | 3.67982700  |
| H | 0.94492900  | 2.50106200  | 3.18064100  |
| H | 1.03245000  | 2.03858500  | 4.89897400  |
| C | 0.37472300  | 4.37308100  | 0.21066900  |
| O | 1.18439400  | 3.86106400  | 0.96079900  |
| O | -0.87381300 | 3.99477000  | 0.04735100  |
| H | -1.06247700 | 3.19491100  | 0.64257200  |
| O | 0.60766400  | 5.42559200  | -0.58678200 |
| C | 1.88706600  | 6.11908400  | -0.54100000 |
| C | 3.00543200  | 5.19684700  | -1.01320100 |
| H | 2.78714500  | 4.82800600  | -2.02123100 |

|   |             |             |             |
|---|-------------|-------------|-------------|
| H | 3.94604700  | 5.75617000  | -1.05130100 |
| H | 3.12756200  | 4.34836400  | -0.33725900 |
| C | 2.14281800  | 6.66862600  | 0.85913400  |
| H | 2.33279200  | 5.86706100  | 1.57417500  |
| H | 3.01348900  | 7.33154100  | 0.83271600  |
| H | 1.27881600  | 7.25089500  | 1.19636800  |
| C | 1.68671200  | 7.26145000  | -1.52969500 |
| H | 1.44537600  | 6.86868700  | -2.52225600 |
| H | 0.86917400  | 7.91160400  | -1.20319200 |
| H | 2.60104400  | 7.85766500  | -1.60197300 |
| N | 0.27976400  | -0.41283000 | -0.18544900 |
| C | -0.23897700 | -1.64971700 | 0.10388300  |
| O | -1.25834700 | -1.84801700 | 0.74502500  |
| O | 0.53172700  | -2.63210200 | -0.38733400 |
| C | 0.02608200  | -3.98042400 | -0.28080800 |
| H | -0.38422800 | -4.10308800 | 0.72534800  |
| C | -1.05313300 | -4.19736300 | -1.32794300 |
| H | -0.64059200 | -4.02964900 | -2.32859500 |
| H | -1.89142000 | -3.51212200 | -1.17426000 |
| H | -1.42807800 | -5.22421300 | -1.27303800 |
| C | 1.22991500  | -4.87900600 | -0.48431900 |
| H | 1.61651600  | -4.76533800 | -1.50245100 |
| H | 0.94495000  | -5.92459500 | -0.33550900 |
| H | 2.02474600  | -4.62554100 | 0.22344400  |
| C | 1.42009300  | -0.24983900 | -1.09770700 |
| C | 1.77304700  | 1.25891900  | -1.31438500 |
| H | 1.63611100  | 1.72501900  | -0.33493400 |
| C | 0.86537900  | 1.96768400  | -2.32052200 |
| H | -0.18927100 | 1.78390000  | -2.12650300 |
| H | 1.09117100  | 1.65871800  | -3.34710700 |

|   |            |             |             |
|---|------------|-------------|-------------|
| H | 1.04071700 | 3.04755300  | -2.24785300 |
| C | 3.23552400 | 1.44555800  | -1.73122700 |
| H | 3.49710300 | 0.83801600  | -2.60561000 |
| H | 3.92511600 | 1.20666700  | -0.91706600 |
| H | 3.39279900 | 2.49356300  | -2.00326200 |
| C | 1.14433400 | -0.97980500 | -2.44303700 |
| O | 0.11641600 | -0.82589500 | -3.07482200 |
| C | 2.30510700 | -1.79741400 | -2.73001000 |
| H | 2.49949500 | -2.32582600 | -3.65325100 |
| C | 3.12425900 | -1.77623600 | -1.64505100 |
| N | 2.62341400 | -0.97371900 | -0.62852200 |
| C | 3.05005500 | -0.87263200 | 0.68968100  |
| O | 2.78589300 | 0.08586900  | 1.38098500  |
| O | 3.72970600 | -1.95941800 | 1.05045900  |
| C | 4.47591200 | -2.00533500 | 2.30758700  |
| C | 5.16929300 | -3.35921700 | 2.23121900  |
| H | 4.43222700 | -4.16688400 | 2.18343400  |
| H | 5.79177500 | -3.50687300 | 3.11855600  |
| H | 5.80558300 | -3.41123800 | 1.34144700  |
| C | 5.50071300 | -0.87817100 | 2.35856000  |
| H | 5.01834700 | 0.10139100  | 2.34877800  |
| H | 6.19108300 | -0.95103700 | 1.51237300  |
| H | 6.08145200 | -0.96886500 | 3.28192200  |
| C | 3.50585900 | -1.95398700 | 3.48069900  |
| H | 3.05433700 | -0.96475900 | 3.57095800  |
| H | 4.04321000 | -2.18461400 | 4.40614300  |
| H | 2.71319600 | -2.69757300 | 3.34557500  |
| C | 4.46444000 | -2.39646300 | -1.59673900 |
| C | 7.01828100 | -3.52386800 | -1.65906100 |
| C | 4.64070400 | -3.70929200 | -2.03785400 |

|                                              |            |             |                             |
|----------------------------------------------|------------|-------------|-----------------------------|
| C                                            | 5.57548600 | -1.64365000 | -1.19843100                 |
| C                                            | 6.84662300 | -2.20417200 | -1.23598300                 |
| C                                            | 5.91489500 | -4.27365200 | -2.05852900                 |
| H                                            | 3.77806300 | -4.29030100 | -2.35055300                 |
| H                                            | 5.44001800 | -0.61571200 | -0.87120800                 |
| H                                            | 7.70552500 | -1.61183900 | -0.93466100                 |
| H                                            | 6.04297300 | -5.29949600 | -2.38995600                 |
| H                                            | 8.01133100 | -3.96236100 | -1.68056900                 |
| Zero-point correction=                       |            |             | 1.075846 (Hartree/Particle) |
| Thermal correction to Energy=                |            |             | 1.141594                    |
| Thermal correction to Enthalpy=              |            |             | 1.142539                    |
| Thermal correction to Gibbs Free Energy=     |            |             | 0.971931                    |
| Sum of electronic and zero-point Energies=   |            |             | -2890.102708                |
| Sum of electronic and thermal Energies=      |            |             | -2890.036960                |
| Sum of electronic and thermal Enthalpies=    |            |             | -2890.036015                |
| Sum of electronic and thermal Free Energies= |            |             | -2890.206623                |
| E(RM062X/6-311+G(2d,p)) =                    |            |             | -2892.08229609              |

### 13. Reference

- (1) N. Gouault, M. Le Roch, C. Cornée, M. David and P. Uriac, Synthesis of Substituted Pyrrolin-4-ones from Amino Acids in Mild Conditions via a Gold-Catalyzed Approach. *J. Org. Chem.*, 2009, **74**, 5614-5617
- (2) R. Spina, E. Colacino, B. Gabriele, G. Salerno, J. Martinez and F. Lamaty, Preparation of enantioenriched iodinated pyrrolinones by iodocyclization of  $\alpha$ -amino-ynones. *Org. Biomol. Chem.*, 2012, **10**, 9085-9089.
- (3) H. Li, W. Shi, C. Wang, H. Liu, W. Wang, Y. Wu and H. Guo, Phosphine-Catalyzed Cascade Annulation of MBH Carbonates and Diazenes: Synthesis of Hexahydrocyclopenta[c]pyrazole Derivatives. *Org. Lett.*, 2021, **23**, 5571-5575.
- (4) J. Jiang, X. Wang, S. Liu, S. Zhang, B. Yang, Y. Zhao and S. Lu, Enantioselective Cascade Annulation of  $\alpha$ -Amino-ynones and Enals Enabled by Gold and Oxidative NHC Relay Catalysis. *Angew. Chem. Int. Ed.*, 2022, **61**, e202115464.
- (5) A. V. Marenich, C. J. Cramer and D. G. Truhlar, Universal Solvation Model Based on Solute Electron Density and on a Continuum Model of the Solvent Defined by the Bulk Dielectric Constant and Atomic Surface Tensions. *J. Phys. Chem. B*, 2009, **113**, 6378-6396.
- (6) R. E. Plata and D. A. Singleton, Case Study of the Mechanism of Alcohol-Mediated Morita Baylis–Hillman Reactions. The Importance of Experimental Observations. *J. Am. Chem. Soc.*, 2015, **137**, 3811-3826.
- (7) G. Luchini, J. Alegre-Requena, I. Funes-Ardoiz and R. Paton, GoodVibes: automated thermochemistry for heterogeneous computational chemistry data. *F1000Research* 2020, **9**.
- (8) C. Y. Legault, *CYLview, 1.0b*, Université de Sherbrooke, 2009 (<http://www.cylview.org>).
- (9) M. J. Frisch, G. W. Trucks, H. B. Schlegel, G. E. Scuseria, M. A. Robb, J. R. Cheeseman, G. Scalmani, V. Barone, G. A. Petersson, H. Nakatsuji, et al *Gaussian 16 Rev. C.01*, Wallingford, CT, 2016.
